# Supplementary material for: Modular construction of sulfinimidate esters: expanding chemical space and enabling late-stage diversification
Source: Royal Society of Chemistry journal article supplement (doi:10.1039/d4qo00502c), 2024-01-01

## Supporting Information

### Modular Construction of Sulfinimidate Esters: Expanding Chemical Space and Enabling Late-Stage Diversification

Ruyi Li, Huaqin Wu, Hang Liu, Junjie Bai, Zao Zhang, Muiyang Zhu, Pengcheng Lian and  
Xiaobing Wan\*

*Key Laboratory of Organic Synthesis of Jiangsu Province, College of Chemistry, Chemical  
Engineering and Materials Science, Soochow University, Suzhou, 215123, China*

\* To whom correspondence should be addressed. E-mail: wanxb@suda.edu.cn

### Table of Contents

|                                                     |            |
|-----------------------------------------------------|------------|
| <b>1. General information .....</b>                 | <b>S2</b>  |
| <b>2. General procedure .....</b>                   | <b>S3</b>  |
| <b>3. Optimization of reaction conditions .....</b> | <b>S4</b>  |
| <b>4. X-Ray diffraction data analysis .....</b>     | <b>S6</b>  |
| <b>5. Characterization data of products .....</b>   | <b>S8</b>  |
| <b>6. NMR Spectra .....</b>                         | <b>S84</b> |

## General Information

Column chromatography was generally performed on silica gel (300-400 mesh) and reactions were monitored by thin layer chromatography (TLC) using UV light to visualize the course of the reactions.

The  $^1\text{H}$  NMR (400 MHz) and  $^{13}\text{C}$  NMR (100 MHz) and  $^{19}\text{F}$  NMR (376 MHz) data were recorded with Chloroform-*d* as solvent at room temperature. The chemical shifts ( $\delta$ ) are reported in ppm and coupling constants (*J*) in Hz.  $^1\text{H}$  NMR spectra was recorded with Chloroform-*d* ( $\delta = 7.26$  ppm) as internal reference;  $^{13}\text{C}$  NMR spectra was recorded with Chloroform-*d* ( $\delta = 77.0$  ppm) as internal reference. IR and HRMS were performed by the State-authorized Analytical Center in Soochow University.

## General procedure

### General procedure for *N*-sulfonyl sulfinimidate esters synthesis

To a 25 mL sealed tube, were added trichloroisocyanuric acid (0.3 mmol, 1.5 equiv., 69.7 mg), Ca(OH)<sub>2</sub> (0.4 mmol, 2.0 equiv., 29.6 mg), sulfamide (0.2 mmol) and thiol (0.4 mmol, 2.0 equiv.). Subsequently, Benzotrifluoride (2.0 mL), H<sub>2</sub>O (50 μL) and alcohol (0.4 mmol, 2.0 equiv.) were added under air. The mixture was stirred in oil bath at 25 °C for 12 h. When over, the reaction mixture was quenched with sodium thiosulfate and diluted with ethyl acetate (20 mL), then washed with NaCl (saturated in water, 3×20 mL) and dried over MgSO<sub>4</sub>. The solvent was removed under reduced pressure and the residue was purified by silica gel column chromatography (ethyl acetate/ petroleum ether) to afford desired products.

### General procedure for *N*-acyl sulfinimidate esters synthesis

To a 25 mL sealed tube, were added trichloroisocyanuric acid (0.3 mmol, 1.5 equiv., 69.7 mg), K<sub>3</sub>PO<sub>4</sub> (0.4 mmol, 2.0 equiv., 84.9 mg), amide (0.2 mmol) and thiol (0.4 mmol, 2.0 equiv.). Subsequently, cyclohexane (2.0 mL) and alcohol (0.4 mmol, 2.0 equiv.) were added under air. The mixture was stirred in oil bath at 25 °C for 12 h. When over, the reaction mixture was quenched with sodium thiosulfate and diluted with ethyl acetate (20 mL), then washed with NaCl (saturated in water, 3×20 mL) and dried over MgSO<sub>4</sub>. The solvent was removed under reduced pressure and the residue was purified by silica gel column chromatography (ethyl acetate/ petroleum ether) to afford desired products.

## Optimization of reaction conditions

**Table S1 Optimization of reaction conditions for *N*-sulfonyl sulfinimidate esters<sup>a</sup>**

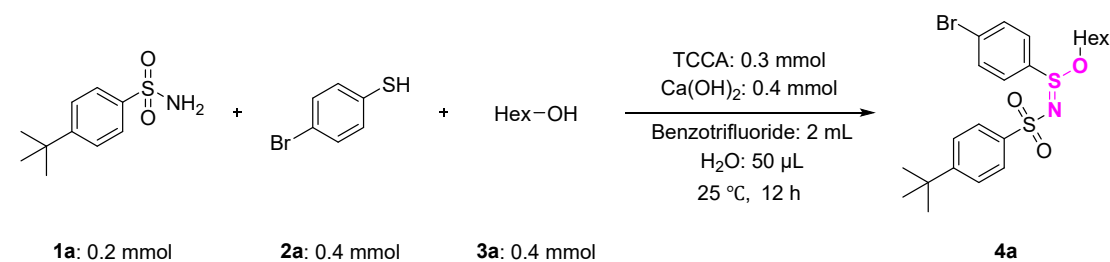

| Entry | Variation from “standard conditions”                                 | Yield(%) <sup>b</sup> |
|-------|----------------------------------------------------------------------|-----------------------|
| 1     | none                                                                 | 85                    |
| 2     | Absence of H <sub>2</sub> O                                          | 79                    |
| 3     | CCl <sub>4</sub> instead of Benzotrifluoride                         | 66                    |
| 4     | DCM instead of Benzotrifluoride                                      | 70                    |
| 5     | MeCN instead of Benzotrifluoride                                     | < 5                   |
| 6     | Cyclohexane instead of Benzotrifluoride                              | 73                    |
| 7     | EA instead of Benzotrifluoride                                       | < 5                   |
| 8     | DMF instead of Benzotrifluoride                                      | < 5                   |
| 9     | DMSO instead of Benzotrifluoride                                     | < 5                   |
| 10    | Acetone instead of Benzotrifluoride                                  | < 5                   |
| 11    | THF instead of Benzotrifluoride                                      | < 5                   |
| 12    | Na <sub>3</sub> PO <sub>4</sub> instead of Ca(OH) <sub>2</sub>       | 60                    |
| 13    | Ba(OH) <sub>2</sub> ·H <sub>2</sub> O instead of Ca(OH) <sub>2</sub> | 58                    |
| 14    | Cs <sub>2</sub> CO <sub>3</sub> instead of Ca(OH) <sub>2</sub>       | 57                    |
| 15    | DMAP instead of Ca(OH) <sub>2</sub>                                  | 36                    |
| 16    | Et <sub>3</sub> N instead of Ca(OH) <sub>2</sub>                     | 63                    |
| 17    | pyridine instead of Ca(OH) <sub>2</sub>                              | 51                    |
| 18    | t-BuOCl instead of TCCA                                              | 41                    |
| 19    | DCDMH instead of TCCA                                                | 19                    |
| 20    | NCS instead of TCCA                                                  | 36                    |

<sup>a</sup> Standard conditions: sulfamides, sulfamides and sulfamates (0.2 mmol), alcohols (0.4 mmol), thiols (0.4 mmol), chlorine source (0.3 mmol), base (0.4 mmol), H<sub>2</sub>O (50 μL) in solvent (2.0 mL), under air at 25°C for 12 h.

**Table S2 Optimization of reaction conditions for *N*-acyl sulfinimidate esters<sup>a</sup>**

$\text{1bi: 0.2 mmol} + \text{2a: 0.4 mmol} + \text{3a: 0.4 mmol} \xrightarrow[\text{Cyclohexane: 2 mL, 25 }^\circ\text{C, 12 h}]{\text{TCCA: 0.3 mmol, K}_3\text{PO}_4: 0.4 \text{ mmol}}$

| Entry | Variation from “standard conditions”                                                        | Yield(%) <sup>b</sup> |
|-------|---------------------------------------------------------------------------------------------|-----------------------|
| 1     | none                                                                                        | 68                    |
| 2     | CCl <sub>4</sub> instead of Cyclohexane                                                     | 39                    |
| 3     | MeCN instead of Cyclohexane                                                                 | < 5                   |
| 4     | Benzotrifluoride instead of Cyclohexane                                                     | 53                    |
| 5     | EA instead of Cyclohexane                                                                   | < 5                   |
| 6     | DMF instead of Cyclohexane                                                                  | < 5                   |
| 7     | DMSO instead of Cyclohexane                                                                 | < 5                   |
| 8     | THF instead of Cyclohexane                                                                  | < 5                   |
| 9     | Ca(OH) <sub>2</sub> instead of K <sub>3</sub> PO <sub>4</sub>                               | 30                    |
| 10    | K <sub>3</sub> PO <sub>4</sub> ·3H <sub>2</sub> O instead of K <sub>3</sub> PO <sub>4</sub> | 41                    |
| 11    | Na <sub>3</sub> PO <sub>4</sub> instead of K <sub>3</sub> PO <sub>4</sub>                   | 43                    |
| 12    | DMAP instead of K <sub>3</sub> PO <sub>4</sub>                                              | < 5                   |
| 13    | Et <sub>3</sub> N instead of K <sub>3</sub> PO <sub>4</sub>                                 | < 5                   |
| 14    | pyridine instead of K <sub>3</sub> PO <sub>4</sub>                                          | < 5                   |
| 15    | t-BuOCl instead of TCCA                                                                     | < 5                   |
| 16    | DCDMH instead of TCCA                                                                       | 16                    |
| 17    | NCS instead of TCCA                                                                         | < 5                   |

<sup>a</sup> Standard conditions: amides and carbamates (0.2 mmol), alcohols (0.4 mmol), thiols (0.4 mmol), chlorine source (0.3 mmol), base (0.4 mmol) in solvent (2.0 mL), under air at 25°C for 12 h.

## X-Ray diffraction analysis

### X-Ray single-crystal data of product 4b

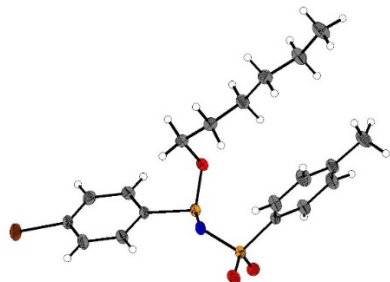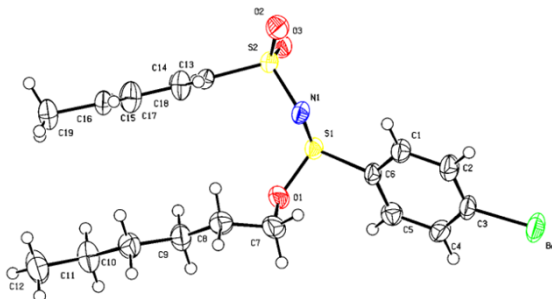

---

|                                           |                                                                  |               |
|-------------------------------------------|------------------------------------------------------------------|---------------|
| Empirical formula                         | C <sub>19</sub> H <sub>24</sub> BrNO <sub>3</sub> S <sub>2</sub> |               |
| Formula weight                            | 458.42                                                           |               |
| Temperature/K                             | 223.00                                                           |               |
| Crystal system                            | triclinic                                                        |               |
| Space group                               | P-1                                                              |               |
| Unit cell dimensions                      | a = 7.9637(6) Å                                                  | α = 78.595(5) |
|                                           | b = 8.4266(5) Å                                                  | β = 76.521(6) |
|                                           | c = 16.2353(10) Å                                                | γ = 84.394(5) |
| Volume/Å <sup>3</sup>                     | 1037.05(12)                                                      |               |
| Z                                         | 2                                                                |               |
| Z'                                        | 1                                                                |               |
| Wavelength/Å                              | 0.71073                                                          |               |
| D <sub>calc</sub> /g cm <sup>-3</sup>     | 1.468                                                            |               |
| μ/mm <sup>-1</sup>                        | 2.201                                                            |               |
| F(000)                                    | 472.0                                                            |               |
| Crystal size/mm <sup>3</sup>              | 0.30×0.20×0.05                                                   |               |
| Radiation type                            | Mo Kα                                                            |               |
| 2θ range for data collection/°            | 2.469 to 29.129                                                  |               |
| Measured reflections                      | 11652                                                            |               |
| Independent reflections                   | 5275 [R <sub>int</sub> = 0.0407]                                 |               |
| Reflections with I > 2(I)                 | 3375                                                             |               |
| restraints/parameters                     | 0/237                                                            |               |
| Goodness-of-fit on F <sup>2</sup>         | 1.037                                                            |               |
| Final R indexes [I >= 2σ (I)]             | R <sub>1</sub> = 0.0500, wR <sub>2</sub> = 0.0840                |               |
| Final R indexes [all data]                | R <sub>1</sub> = 0.0938, wR <sub>2</sub> = 0.1018                |               |
| Largest diff. peak/hole/e Å <sup>-3</sup> | 0.541/-0.638                                                     |               |

---



## Characterization Data of Products

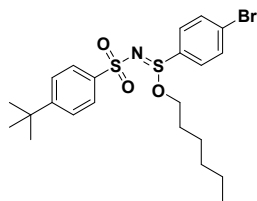

### 4a

petroleum ether / ethyl acetate = 15:1 – 6:1, a yellow solid, 85% yield (84.8 mg). mp: 62 – 64 °C.  $^1\text{H}$  NMR (400 MHz, Chloroform-*d*)  $\delta$  7.87 – 7.84 (m, 2H), 7.68 – 7.63 (m, 4H), 7.47 – 7.44 (m, 2H), 3.88 (dt,  $J = 9.3, 6.7$  Hz, 1H), 3.41 (dt,  $J = 9.3, 6.8$  Hz, 1H), 1.42 – 1.36 (m, 2H), 1.29 (s, 9H), 1.23 – 1.10 (m, 6H), 0.80 (t,  $J = 7.1$  Hz, 3H).  $^{13}\text{C}$  NMR (100 MHz, Chloroform-*d*)  $\delta$  155.5, 140.2, 134.7, 132.7, 128.8, 128.2, 126.1, 125.7, 65.8, 34.9, 31.03, 30.97, 28.7, 25.0, 22.2, 13.8. HRMS (ESI-TOF): Anal Calcd. For.  $\text{C}_{22}\text{H}_{30}\text{BrNO}_3\text{S}_2 + \text{Na}^+$ : 524.0723, found: 524.0708. IR (neat,  $\text{cm}^{-1}$ ):  $\nu$  2957, 2871, 1314, 1153, 1021, 1001, 825, 793, 629.

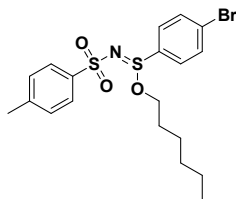

### 4b

petroleum ether / ethyl acetate = 15:1 – 5:1, a colorless solid, 91% yield (83.2 mg). mp: 80 – 82 °C.  $^1\text{H}$  NMR (400 MHz, Chloroform-*d*)  $\delta$  7.86 – 7.83 (m, 2H), 7.70 – 7.65 (m, 4H), 7.29 – 7.27 (m, 2H), 4.03 (dq,  $J = 9.8, 7.1$  Hz, 1H), 3.60 (dq,  $J = 9.8, 7.1$  Hz, 1H), 2.40 (s, 3H), 1.13 (t,  $J = 7.1$  Hz, 3H).  $^{13}\text{C}$  NMR (100 MHz, Chloroform-*d*)  $\delta$  142.5, 140.4, 134.8, 132.8, 129.3, 128.8, 128.2, 126.3, 65.8, 31.1, 28.8, 25.1, 22.3, 21.4, 13.8. HRMS (ESI-TOF): Anal Calcd. For.  $\text{C}_{19}\text{H}_{24}\text{BrNO}_3\text{S}_2 + \text{Na}^+$ : 482.0253, found: 482.0257. IR (neat,  $\text{cm}^{-1}$ ):  $\nu$  3353, 3259, 2957, 2931, 2860, 1736, 1242, 1146, 1003, 816, 698.

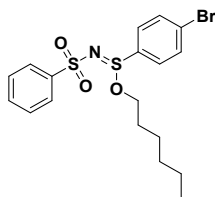

### 4c



petroleum ether / ethyl acetate = 15:1 – 8:1, a white solid, 76% yield (67.3 mg). mp: 80 – 82 °C. **<sup>1</sup>H NMR** (400 MHz, Chloroform-*d*) δ 7.96 – 7.93 (m, 2H), 7.68 – 7.63 (m, 4H), 7.52 – 7.43 (m, 3H), 3.88 (dt, *J* = 9.6, 6.6 Hz, 1H), 3.43 (dt, *J* = 9.6, 6.7 Hz, 1H), 1.44 – 1.36 (m, 2H), 1.23 – 1.09 (m, 6H), 0.82 (t, *J* = 7.1 Hz, 3H). **<sup>13</sup>C NMR** (100 MHz, Chloroform-*d*) δ 143.2, 134.6, 132.8, 131.9, 128.81, 128.77, 128.3, 126.3, 65.9, 31.0, 28.8, 25.0, 22.3, 13.8. **HRMS** (ESI-TOF): Anal Calcd. For. C<sub>18</sub>H<sub>22</sub>BrNO<sub>3</sub>S<sub>2</sub>+H<sup>+</sup>: 444.0298, found: 444.0302. **IR** (neat, cm<sup>-1</sup>): ν 2956, 2928, 1328, 1143, 1001, 819, 738, 636.

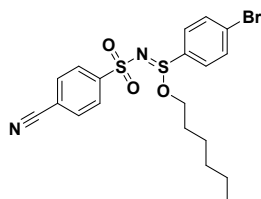

#### 4d

petroleum ether / ethyl acetate = 15:1 – 6:1, a yellow solid, 59% yield (55.2 mg). mp: 78 – 80 °C. **<sup>1</sup>H NMR** (400 MHz, Chloroform-*d*) δ 8.07 – 8.04 (m, 2H), 7.77 – 7.75 (m, 2H), 7.71 – 7.63 (m, 4H), 3.96 – 3.89 (m, 1H), 3.52 – 3.46 (m, 1H), 1.46 – 1.42 (m, 2H), 1.23 – 1.12 (m, 6H), 0.83 (t, *J* = 7.1 Hz, 3H). **<sup>13</sup>C NMR** (100 MHz, Chloroform-*d*) δ 147.3, 134.0, 133.0, 132.7, 128.8, 128.7, 127.0, 117.4, 115.6, 66.5, 31.0, 28.8, 25.0, 22.3, 13.8. **HRMS** (ESI-TOF): Anal Calcd. For. C<sub>19</sub>H<sub>21</sub>BrN<sub>2</sub>O<sub>3</sub>S<sub>2</sub>+Na<sup>+</sup>: 491.0070, found: 491.0058. **IR** (neat, cm<sup>-1</sup>): ν 3346, 3090, 2956, 2935, 2921, 2859, 2230, 1568, 1467, 1319, 1147, 992, 890, 823, 807, 636.

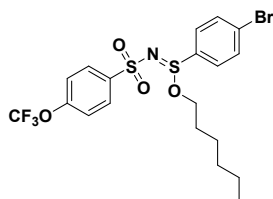

#### 4e

petroleum ether / ethyl acetate = 20:1 – 10:1, a yellow solid, 92% yield (97.0 mg). mp: 46 – 48 °C. **<sup>1</sup>H NMR** (400 MHz, Chloroform-*d*) δ 8.01 – 7.97 (m, 2H), 7.69 – 7.64 (m, 4H), 7.29 – 7.27 (m, 2H), 3.92 – 3.86 (m, 1H), 3.47 – 3.41 (m, 1H), 1.45 – 1.37 (m, 2H), 1.22 – 1.09 (m, 6H), 0.81 (t, *J* = 6.8 Hz, 3H). **<sup>13</sup>C NMR** (100 MHz, Chloroform-*d*) δ 151.5 (q, *J* = 1.9 Hz), 141.7, 134.3, 132.9, 128.8, 128.5, 128.4, 120.7, 120.1 (q, *J* = 259.2 Hz), 66.1, 31.0, 28.8, 25.0, 22.2, 13.7. **<sup>19</sup>F NMR** (376 MHz, Chloroform-*d*) δ

-57.77 (s, 3F). **HRMS** (ESI-TOF): Anal Calcd. For.  $C_{19}H_{21}BrF_3NO_4S_2+Na^+$ : 551.9920, found: 551.9918.

**IR** (neat,  $cm^{-1}$ ):  $\nu$  2959, 2930, 2874, 1469, 1321, 1247, 1222, 1163, 1149, 995, 790, 697.

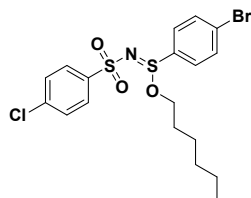

#### 4f

petroleum ether / ethyl acetate = 15:1 – 7:1, a white solid, 89% yield (84.9 mg). mp: 78 – 80 °C. **<sup>1</sup>H NMR** (400 MHz, Chloroform-*d*)  $\delta$  7.90 – 7.87 (m, 2H), 7.70 – 7.63 (m, 4H), 7.44 – 7.41 (m, 2H), 3.93 – 3.87 (m, 1H), 3.45 (dt,  $J = 9.6, 6.6$  Hz, 1H), 1.46 – 1.38 (m, 2H), 1.23 – 1.11 (m, 6H), 0.83 (t,  $J = 7.1$  Hz, 3H). **<sup>13</sup>C NMR** (100 MHz, Chloroform-*d*)  $\delta$  141.8, 138.2, 134.4, 132.9, 129.0, 128.8, 128.5, 127.8, 66.1, 31.1, 28.8, 25.1, 22.3, 13.8. **HRMS** (ESI-TOF): Anal Calcd. For.  $C_{18}H_{21}BrClNO_3S_2+Na^+$ : 501.9707, found: 501.9690. **IR** (neat,  $cm^{-1}$ ):  $\nu$  3092, 2952, 2922, 2854, 1468, 1319, 1150, 993, 796, 623.

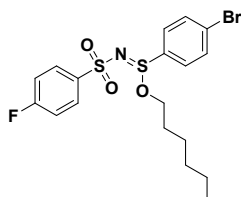

#### 4g

petroleum ether / ethyl acetate = 15:1 – 7:1, a yellow solid, 96% yield (88.5 mg). mp: 61 – 63 °C. **<sup>1</sup>H NMR** (400 MHz, Chloroform-*d*)  $\delta$  7.98 – 7.93 (m, 2H), 7.70 – 7.63 (m, 4H), 7.16 – 7.10 (m, 2H), 3.94 – 3.88 (m, 1H), 3.46 (dt,  $J = 9.6, 6.7$  Hz, 1H), 1.47 – 1.39 (m, 2H), 1.24 – 1.11 (m, 6H), 0.83 (t,  $J = 7.1$  Hz, 3H). **<sup>13</sup>C NMR** (100 MHz, Chloroform-*d*)  $\delta$  164.5 (d,  $J = 253.4$  Hz), 139.4 (d,  $J = 3.3$  Hz), 134.5, 132.9, 129.0 (d,  $J = 9.1$  Hz), 128.8, 128.4, 115.9 (d,  $J = 22.4$  Hz), 66.0, 31.1, 28.8, 25.1, 22.3, 13.8. **<sup>19</sup>F NMR** (376 MHz, Chloroform-*d*)  $\delta$  -106.58 (s, 1F). **HRMS** (ESI-TOF): Anal Calcd. For.  $C_{18}H_{21}BrFNO_3S_2+Na^+$ : 486.0002, found: 486.0005. **IR** (neat,  $cm^{-1}$ ):  $\nu$  3359, 3258, 2957, 2928, 2869, 1313, 1288, 1145, 1012, 1001, 912, 834, 819, 697, 667.

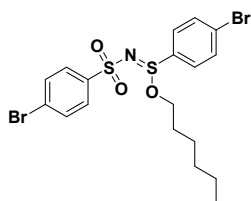

#### 4h

petroleum ether / ethyl acetate =15:1 – 7:1, a colorless solid, 88% yield (92.0 mg). mp: 78 – 80 °C. **<sup>1</sup>H NMR** (400 MHz, Chloroform-*d*) δ 7.83 – 7.80 (m, 2H), 7.70 – 7.63 (m, 4H), 7.61 – 7.58 (m, 2H), 3.91 (dt, *J* = 9.6, 6.6 Hz, 1H), 3.45 (dt, *J* = 9.6, 6.7 Hz, 1H), 1.47 – 1.39 (m, 2H), 1.24 – 1.12 (m, 6H), 0.84 (t, *J* = 7.1 Hz, 3H). **<sup>13</sup>C NMR** (100 MHz, Chloroform-*d*) δ 142.3, 134.4, 132.9, 132.0, 128.8, 128.5, 128.0, 126.7, 66.1, 31.1, 28.8, 25.1, 22.3, 13.9. **HRMS** (ESI-TOF): Anal Calcd. For. C<sub>18</sub>H<sub>21</sub>Br<sub>2</sub>NO<sub>3</sub>S<sub>2</sub>+Na<sup>+</sup>: 543.9222, found: 543.9219. **IR** (neat, cm<sup>-1</sup>): ν 2951, 2923, 2857, 1570, 1468, 1318, 1066, 884, 819, 794, 729, 699, 609.

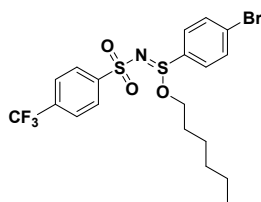

#### 4i

petroleum ether / ethyl acetate =15:1 – 7:1, a white solid, 97% yield (99.1 mg). mp: 74 – 76 °C. **<sup>1</sup>H NMR** (400 MHz, Chloroform-*d*) δ 8.10 – 8.08 (m, 2H), 7.75 – 7.73 (m, 2H), 7.72 – 7.64 (m, 4H), 3.91 (dt, *J* = 9.6, 6.6 Hz, 1H), 3.47 (dt, *J* = 9.6, 6.7 Hz, 1H), 1.46 – 1.37 (m, 2H), 1.23 – 1.10 (m, 6H), 0.83 (t, *J* = 7.1 Hz, 3H). **<sup>13</sup>C NMR** (100 MHz, Chloroform-*d*) δ 146.7 (q, *J* = 1.2 Hz), 134.2, 133.7 (q, *J* = 33.1 Hz), 133.0, 128.8, 128.7, 126.9, 126.0 (q, *J* = 3.6 Hz), 123.3 (q, *J* = 270.9 Hz), 66.3, 31.0, 28.8, 25.1, 22.3, 13.8. **<sup>19</sup>F NMR** (376 MHz, Chloroform-*d*) δ -63.02 (s, 3F). **HRMS** (ESI-TOF): Anal Calcd. For. C<sub>19</sub>H<sub>21</sub>BrF<sub>3</sub>NO<sub>3</sub>S<sub>2</sub>+Na<sup>+</sup>: 533.9991, found: 534.0006. **IR** (neat, cm<sup>-1</sup>): ν 2963, 2928, 1316, 1149, 1137, 1090, 1076, 1001, 913, 821, 804, 726, 710, 616.

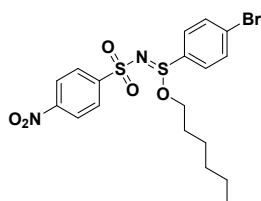

**4j**

petroleum ether / ethyl acetate = 15:1 – 8:1, a yellow solid, 86% yield (83.9 mg). mp: 126 – 128 °C. **<sup>1</sup>H NMR** (400 MHz, Chloroform-*d*) δ 8.33 – 8.30 (m, 2H), 8.15 – 8.11 (m, 2H), 7.72 – 7.64 (m, 4H), 3.96 (dt, *J* = 9.6, 6.6 Hz, 1H), 3.52 (dt, *J* = 9.6, 6.6 Hz, 1H), 1.50 – 1.43 (m, 2H), 1.23 – 1.11 (m, 6H), 0.82 (t, *J* = 7.0 Hz, 3H). **<sup>13</sup>C NMR** (100 MHz, Chloroform-*d*) δ 149.6, 148.9, 134.0, 133.1, 128.9, 128.7, 127.6, 124.1, 66.6, 31.0, 28.9, 25.1, 22.3, 13.8. **HRMS** (ESI-TOF): Anal Calcd. For. C<sub>18</sub>H<sub>21</sub>BrN<sub>2</sub>O<sub>5</sub>S<sub>2</sub>+Na<sup>+</sup>: 510.9968, found: 510.9961. **IR** (neat, cm<sup>-1</sup>): ν 3335, 3251, 2955, 2923, 2854, 1520, 1347, 1150, 993, 730, 684, 615.

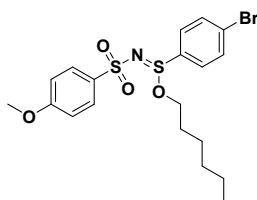**4k**

petroleum ether / ethyl acetate = 15:1 – 5:1, a light yellow solid, 80% yield (75.7 mg). mp: 58 – 60 °C. **<sup>1</sup>H NMR** (400 MHz, Chloroform-*d*) δ 7.88 – 7.83 (m, 2H), 7.67 – 7.61 (m, 4H), 6.93 – 6.89 (m, 2H), 3.88 (dt, *J* = 9.6, 6.6 Hz, 1H), 3.80 (s, 3H), 3.41 (dt, *J* = 9.5, 6.7 Hz, 1H), 1.43 – 1.37 (m, 2H), 1.22 – 1.08 (m, 6H), 0.80 (t, *J* = 7.1 Hz, 3H). **<sup>13</sup>C NMR** (100 MHz, Chloroform-*d*) δ 162.2, 135.1, 134.7, 132.7, 128.8, 128.3, 128.1, 113.8, 65.7, 55.4, 31.0, 28.8, 25.0, 22.2, 13.8. **HRMS** (ESI-TOF): Anal Calcd. For. C<sub>19</sub>H<sub>24</sub>BrNO<sub>4</sub>S<sub>2</sub>+H<sup>+</sup>: 476.0383, found: 476.0388. **IR** (neat, cm<sup>-1</sup>): ν 2950, 2925, 2869, 2859, 1386, 1142, 1066, 995, 821, 808, 731, 697, 666.

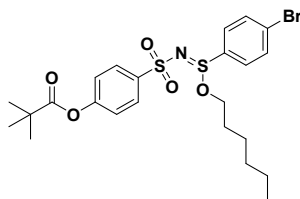**4l**

petroleum ether / ethyl acetate = 20:1 – 10:1, a viscous waxy oil, 49% yield (53.2 mg). **<sup>1</sup>H NMR** (400 MHz, Chloroform-*d*) δ 7.98 – 7.95 (m, 2H), 7.69 – 7.64 (m, 4H), 7.18 – 7.15 (m, 2H), 3.92 (dt, *J* = 9.6, 6.6 Hz, 1H), 3.46 (dt, *J* = 9.6, 6.7 Hz, 1H), 1.49 – 1.42 (m, 2H), 1.33 (s, 9H), 1.24 – 1.14 (m, 6H), 0.83

(t,  $J = 7.1$  Hz, 3H).  $^{13}\text{C}$  NMR (100 MHz, Chloroform-*d*)  $\delta$  176.3, 153.8, 140.4, 134.6, 132.9, 128.8, 128.4, 127.9, 122.0, 66.1, 39.1, 31.1, 28.9, 27.0, 25.1, 22.3, 13.9. HRMS (ESI-TOF): Anal Calcd. For.  $\text{C}_{23}\text{H}_{30}\text{BrNO}_3\text{S}_2+\text{Na}^+$ : 568.0621, found: 568.0621. IR (neat,  $\text{cm}^{-1}$ ):  $\nu$  3084, 2956, 2930, 2871, 1747, 1149, 1108, 1001, 894, 689, 606.

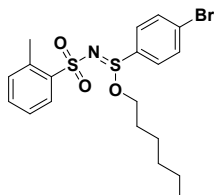

#### 4m

petroleum ether / ethyl acetate = 20:1 – 10:1, a light yellow solid, 84% yield (76.8 mg). mp: 71 – 73 °C.  $^1\text{H}$  NMR (400 MHz, Chloroform-*d*)  $\delta$  8.08 – 8.05 (m, 1H), 7.71 – 7.66 (m, 4H), 7.42 – 7.38 (m, 1H), 7.30 – 7.26 (m, 2H), 3.91 (dt,  $J = 9.6, 6.6$  Hz, 1H), 3.46 (dt,  $J = 9.5, 6.6$  Hz, 1H), 2.75 (s, 3H), 1.45 – 1.35 (m, 2H), 1.24 – 1.11 (m, 6H), 0.84 (t,  $J = 7.1$  Hz, 3H).  $^{13}\text{C}$  NMR (100 MHz, Chloroform-*d*)  $\delta$  141.3, 136.9, 134.8, 132.8, 132.03, 132.01, 128.7, 128.2, 127.5, 125.8, 66.2, 31.0, 28.8, 25.0, 22.2, 20.5, 13.8. HRMS (ESI-TOF): Anal Calcd. For.  $\text{C}_{19}\text{H}_{24}\text{BrNO}_3\text{S}_2+\text{H}^+$ : 458.0454, found: 458.0454. IR (neat,  $\text{cm}^{-1}$ ):  $\nu$  3376, 3272, 2956, 2922, 2856, 1568, 1469, 1307, 1153, 999, 824, 760, 697, 688.

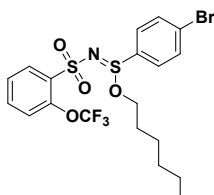

#### 4n

petroleum ether / ethyl acetate = 15:1 – 8:1, a colorless solid, 83% yield (87.5 mg). mp: 77 – 79 °C.  $^1\text{H}$  NMR (400 MHz, Chloroform-*d*)  $\delta$  8.17 – 8.14 (m, 1H), 7.69 – 7.64 (m, 4H), 7.57 – 7.53 (m, 1H), 7.39 – 7.35 (m, 1H), 7.32 – 7.29 (m, 1H), 4.11 (dt,  $J = 9.6, 6.6$  Hz, 1H), 3.61 (dt,  $J = 9.7, 6.6$  Hz, 1H), 1.59 – 1.52 (m, 2H), 1.26 – 1.16 (m, 6H), 0.83 (t,  $J = 6.9$  Hz, 3H).  $^{13}\text{C}$  NMR (100 MHz, Chloroform-*d*)  $\delta$  145.8 (q,  $J = 1.9$  Hz), 134.8, 134.4, 133.7, 132.8, 130.2, 128.7, 128.4, 126.2, 120.2 (q,  $J = 260.6$  Hz), 119.6 (q,  $J = 1.8$  Hz), 66.7, 31.1, 29.0, 25.1, 22.3, 13.8.  $^{19}\text{F}$  NMR (376 MHz, Chloroform-*d*)  $\delta$  -55.94 (s, 3F).

**HRMS** (ESI-TOF): Anal Calcd. For.  $C_{19}H_{21}BrF_3NO_4S_2+Na^+$ : 551.9920, found: 551.9925. **IR** (neat,  $cm^{-1}$ ):  $\nu$  2957, 2925, 2875, 1471, 1241, 1217, 1162, 1150, 1069, 994, 768, 700.

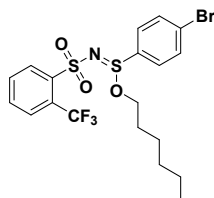

#### 4o

petroleum ether / ethyl acetate = 15:1 – 8:1, a light yellow solid, 79% yield (80.7 mg). mp: 91 – 93 °C.  **$^1H$  NMR** (400 MHz, Chloroform-*d*)  $\delta$  8.37 – 8.35 (m, 1H), 7.83 – 7.81 (m, 1H), 7.71 – 7.61 (m, 6H), 4.03 (dt,  $J = 9.6, 6.6$  Hz, 1H), 3.53 (dt,  $J = 9.6, 6.6$  Hz, 1H), 1.51 – 1.44 (m, 2H), 1.24 – 1.14 (m, 6H), 0.83 (t,  $J = 7.0$  Hz, 3H).  **$^{13}C$  NMR** (100 MHz, Chloroform-*d*)  $\delta$  141.5 (q,  $J = 0.9$  Hz), 134.3, 132.7, 132.2, 132.0, 130.4, 128.7, 128.3, 127.9 (q,  $J = 6.3$  Hz), 127.2 (q,  $J = 33.2$  Hz), 122.7 (q,  $J = 274.5$  Hz), 66.2, 30.9, 28.7, 24.9, 22.1, 13.7.  **$^{19}F$  NMR** (376 MHz, Chloroform-*d*)  $\delta$  -57.35 (s, 3F). **HRMS** (ESI-TOF): Anal Calcd. For.  $C_{19}H_{21}BrF_3NO_3S_2+Na^+$ : 535.9971, found: 535.9971. **IR** (neat,  $cm^{-1}$ ):  $\nu$  2959, 2937, 1470, 1322, 1305, 1267, 1144, 997, 882, 837, 798, 780, 703.

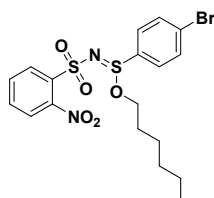

#### 4p

petroleum ether / ethyl acetate = 15:1 – 7:1, a light yellow solid, 74% yield (72.2 mg). mp: 94 – 96 °C.  **$^1H$  NMR** (400 MHz, Chloroform-*d*)  $\delta$  8.26 – 8.21 (m, 1H), 7.71 – 7.61 (m, 7H), 4.14 (dt,  $J = 9.7, 6.6$  Hz, 1H), 3.65 (dt,  $J = 9.6, 6.6$  Hz, 1H), 1.60 – 1.53 (m, 2H), 1.26 – 1.16 (m, 6H), 0.83 (t,  $J = 6.8$  Hz, 3H).  **$^{13}C$  NMR** (100 MHz, Chloroform-*d*)  $\delta$  147.5, 135.6, 134.5, 133.0, 132.8, 132.0, 130.3, 128.8, 128.5, 124.1, 67.2, 31.1, 28.9, 25.0, 22.3, 13.8. **HRMS** (ESI-TOF): Anal Calcd. For.  $C_{18}H_{21}BrN_2O_5S_2+H^+$ : 489.0149, found: 489.0156. **IR** (neat,  $cm^{-1}$ ):  $\nu$  2964, 2919, 2855, 1540, 1319, 1149, 1019, 1001, 879, 839, 798, 785, 728, 702.

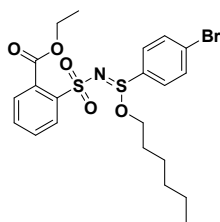

#### 4q

petroleum ether / ethyl acetate = 15:1 – 6:1, a viscous waxy oil, 60% yield (61.8 mg). **<sup>1</sup>H NMR** (400 MHz, Chloroform-*d*)  $\delta$  8.16 – 8.12 (m, 1H), 7.67 – 7.62 (m, 4H), 7.55 – 7.51 (m, 3H), 4.42 – 4.27 (m, 2H), 4.09 (dt, *J* = 9.6, 6.6 Hz, 1H), 3.57 (dt, *J* = 9.6, 6.7 Hz, 1H), 1.55 – 1.48 (m, 2H), 1.34 (t, *J* = 7.2 Hz, 3H), 1.24 – 1.15 (m, 6H), 0.82 (t, *J* = 6.9 Hz, 3H). **<sup>13</sup>C NMR** (100 MHz, Chloroform-*d*)  $\delta$  167.4, 140.7, 135.1, 132.6, 131.8, 131.7, 130.3, 128.9, 128.6, 127.9, 66.4, 62.0, 31.0, 28.9, 25.0, 22.2, 13.9, 13.8. **HRMS** (ESI-TOF): Anal Calcd. For. C<sub>21</sub>H<sub>26</sub>BrNO<sub>5</sub>S<sub>2</sub>+H<sup>+</sup>: 516.0509, found: 516.0504. **IR** (neat, cm<sup>-1</sup>):  $\nu$  3086, 2956, 2929, 2859, 1725, 1290, 1255, 1059, 1021, 1002, 754, 733.

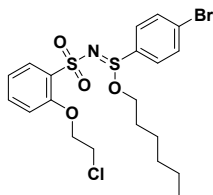

#### 4r

petroleum ether / ethyl acetate = 15:1 – 4:1, a viscous waxy oil, 63% yield (65.6 mg). **<sup>1</sup>H NMR** (400 MHz, Chloroform-*d*)  $\delta$  8.08 – 8.05 (m, 1H), 7.66 – 7.61 (m, 4H), 7.49 – 7.45 (m, 1H), 7.10 – 7.06 (m, 1H), 6.95 – 6.93 (m, 1H), 4.31 – 4.18 (m, 2H), 4.14 (dt, *J* = 9.7, 6.6 Hz, 1H), 3.81 – 3.70 (m, 2H), 3.57 (dt, *J* = 9.7, 6.6 Hz, 1H), 1.60 – 1.53 (m, 2H), 1.27 – 1.17 (m, 6H), 0.84 (t, *J* = 6.9 Hz, 3H). **<sup>13</sup>C NMR** (100 MHz, Chloroform-*d*)  $\delta$  155.1, 135.3, 133.9, 132.6, 131.4, 129.9, 128.9, 127.9, 121.4, 114.3, 70.0, 66.0, 41.5, 31.1, 29.0, 25.2, 22.3, 13.9. **HRMS** (ESI-TOF): Anal Calcd. For. C<sub>20</sub>H<sub>25</sub>BrClNO<sub>4</sub>S<sub>2</sub>+Na<sup>+</sup>: 545.9969, found: 545.9969. **IR** (neat, cm<sup>-1</sup>):  $\nu$  2956, 2928, 2859, 1588, 1473, 1150, 1066, 1022, 1002, 891, 825, 798, 755, 732.

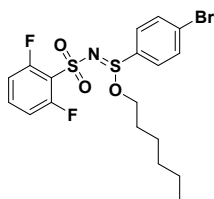

#### 4s

petroleum ether / ethyl acetate = 15:1 – 7:1, a light yellow solid, 83% yield (79.5 mg). mp: 59 – 61 °C.

**<sup>1</sup>H NMR** (400 MHz, Chloroform-*d*) δ 7.70 – 7.66 (m, 4H), 7.47 – 7.40 (m, 1H), 6.97 – 6.92 (m, 2H), 4.10 (dt, *J* = 9.6, 6.6 Hz, 1H), 3.60 (dt, *J* = 9.6, 6.6 Hz, 1H), 1.56 – 1.49 (m, 2H), 1.24 – 1.14 (m, 6H), 0.81 (t, *J* = 6.8 Hz, 3H). **<sup>13</sup>C NMR** (100 MHz, Chloroform-*d*) δ 159.1 (dd, *J* = 258.5, 4.0 Hz), 134.3, 133.7 (t, *J* = 10.9 Hz), 132.9, 128.7, 128.5, 120.4 (t, *J* = 15.7 Hz), 112.8 (dd, *J* = 23.5, 3.6 Hz), 66.8, 31.0, 28.9, 25.0, 22.2, 13.8. **<sup>19</sup>F NMR** (376 MHz, Chloroform-*d*) δ -107.04 (s, 2F). **HRMS** (ESI-TOF): Anal Calcd. For. C<sub>18</sub>H<sub>20</sub>BrF<sub>2</sub>NO<sub>3</sub>S<sub>2</sub>+Na<sup>+</sup>: 503.9908, found: 503.9903. **IR** (neat, cm<sup>-1</sup>): ν 2957, 2921, 2857, 1609, 1465, 1331, 1159, 1000, 803, 789, 637.

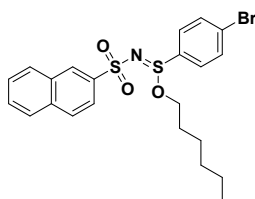

#### 4t

petroleum ether / ethyl acetate = 15:1 – 6:1, a viscous waxy oil, 87% yield (85.8 mg). **<sup>1</sup>H NMR** (400 MHz, Chloroform-*d*) δ 8.52 (s, 1H), 7.96 – 7.90 (m, 3H), 7.87 – 7.85 (m, 1H), 7.86 – 7.64 (m, 4H), 7.61 – 7.54 (m, 2H), 3.89 (dt, *J* = 9.5, 6.7 Hz, 1H), 3.42 (dt, *J* = 9.5, 6.7 Hz, 1H), 1.37 – 1.27 (m, 2H), 1.13 – 0.97 (m, 6H), 0.76 (t, *J* = 7.2 Hz, 3H). **<sup>13</sup>C NMR** (100 MHz, Chloroform-*d*) δ 140.1, 134.6, 134.4, 132.8, 132.1, 129.12, 129.08, 128.8, 128.34, 128.30, 127.7, 127.3, 126.9, 122.3, 65.9, 31.0, 28.8, 25.0, 22.2, 13.8. **HRMS** (ESI-TOF): Anal Calcd. For. C<sub>22</sub>H<sub>24</sub>BrNO<sub>3</sub>S<sub>2</sub>+Na<sup>+</sup>: 518.0253, found: 518.0237. **IR** (neat, cm<sup>-1</sup>): ν 2953, 2929, 2858, 1470, 1307, 1148, 1127, 1020, 999, 731, 659.

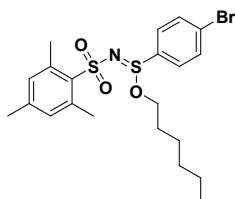



**4u**

petroleum ether / ethyl acetate = 20:1 – 10:1, a colorless oil, 62% yield (60.1 mg). mp: 63 – 65 °C. **<sup>1</sup>H NMR** (400 MHz, Chloroform-*d*) δ 7.69 – 7.64 (m, 4H), 6.90 (s, 2H), 3.82 (dt, *J* = 9.5, 6.7 Hz, 1H), 3.37 (dt, *J* = 9.5, 6.7 Hz, 1H), 2.72 (s, 6H), 2.26 (s, 3H), 1.41 – 1.30 (m, 2H), 1.25 – 1.18 (m, 2H), 1.12 – 1.07 (m, 4H), 0.83 (t, *J* = 7.2 Hz, 3H). **<sup>13</sup>C NMR** (100 MHz, Chloroform-*d*) δ 141.3, 138.2, 137.6, 135.1, 132.8, 131.5, 128.9, 128.2, 65.5, 31.2, 28.9, 25.1, 23.1, 22.4, 20.9, 13.9. **HRMS** (ESI-TOF): Anal Calcd. For. C<sub>21</sub>H<sub>28</sub>BrNO<sub>3</sub>S<sub>2</sub>+Na<sup>+</sup>: 510.0566, found: 510.0567. **IR** (neat, cm<sup>-1</sup>): ν 3371, 3262, 2971, 2947, 2923, 2855, 1306, 1002, 784, 659.

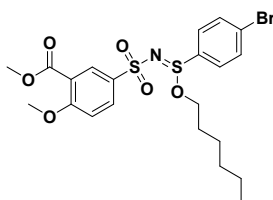**4v**

petroleum ether / ethyl acetate = 15:1 – 2:1, a viscous waxy oil, 90% yield (95.6 mg). **<sup>1</sup>H NMR** (400 MHz, Chloroform-*d*) δ 8.39 – 8.33 (m, 1H), 8.05 – 8.02 (m, 1H), 7.69 – 7.63 (m, 4H), 7.04 – 7.02 (m, 1H), 3.97 – 3.88 (m, 4H), 3.86 (s, 3H), 3.47 (dt, *J* = 9.6, 6.7 Hz, 1H), 1.48 – 1.41 (m, 2H), 1.23 – 1.11 (m, 6H), 0.82 (t, *J* = 7.1 Hz, 3H). **<sup>13</sup>C NMR** (100 MHz, Chloroform-*d*) δ 165.0, 161.5, 134.9, 134.6, 132.8, 131.7, 130.3, 128.8, 128.4, 120.1, 111.9, 66.1, 56.3, 52.2, 31.1, 28.9, 25.1, 22.3, 13.8. **HRMS** (ESI-TOF): Anal Calcd. For. C<sub>21</sub>H<sub>26</sub>BrNO<sub>6</sub>S<sub>2</sub>+Na<sup>+</sup>: 554.0278, found: 554.0276. **IR** (neat, cm<sup>-1</sup>): ν 3086, 2953, 2858, 1732, 1281, 1146, 1019, 1000, 871, 785, 732, 658.

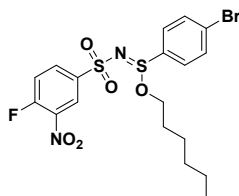**4w**

petroleum ether / ethyl acetate = 15:1 – 5:1, a viscous waxy oil, 87% yield (88.0 mg). **<sup>1</sup>H NMR** (400 MHz, Chloroform-*d*) δ 8.63 – 8.61 (m, 1H), 8.23 – 8.19 (m, 1H), 7.73 – 7.65 (m, 4H), 7.44 – 7.39 (m, 1H), 3.99 (dt, *J* = 9.6, 6.6 Hz, 1H), 3.55 (dt, *J* = 9.6, 6.6 Hz, 1H), 1.53 – 1.47 (m, 2H), 1.24 – 1.14 (m,

6H), 0.82 (t,  $J = 7.0$  Hz, 3H).  $^{13}\text{C}$  NMR (100 MHz, Chloroform-*d*)  $\delta$  157.0 (d,  $J = 271.2$  Hz), 140.5 (d,  $J = 4.2$  Hz), 137.0 (d,  $J = 8.6$  Hz), 133.8, 133.4 (d,  $J = 9.7$  Hz), 133.1, 128.9, 128.7, 124.9 (d,  $J = 2.1$  Hz), 119.3 (d,  $J = 21.9$  Hz), 66.8, 31.0, 28.9, 25.1, 22.3, 13.8.  $^{19}\text{F}$  NMR (376 MHz, Chloroform-*d*)  $\delta$  -111.43 (s, 1F). HRMS (ESI-TOF): Anal Calcd. For.  $\text{C}_{18}\text{H}_{20}\text{BrFN}_2\text{O}_5\text{S}_2+\text{Na}^+$ : 528.9874, found: 528.9870. IR (neat,  $\text{cm}^{-1}$ ):  $\nu$  3091, 2956, 2929, 2859, 1537, 1162, 1021, 1000, 897, 817, 733, 657.

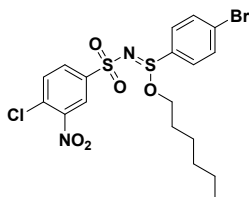

#### 4x

petroleum ether / ethyl acetate = 15:1 – 8:1, a yellow solid, 87% yield (90.8 mg). mp: 65 – 67 °C.  $^1\text{H}$  NMR (400 MHz, Chloroform-*d*)  $\delta$  8.41 – 8.40 (m, 1H), 8.08 – 8.05 (m, 1H), 7.73 – 7.65 (m, 5H), 3.97 (dt,  $J = 9.6, 6.6$  Hz, 1H), 3.53 (dt,  $J = 9.6, 6.6$  Hz, 1H), 1.52 – 1.44 (m, 2H), 1.24 – 1.13 (m, 6H), 0.82 (t,  $J = 7.0$  Hz, 3H).  $^{13}\text{C}$  NMR (100 MHz, Chloroform-*d*)  $\delta$  147.9, 143.8, 134.1, 133.4, 132.9, 130.9, 130.8, 129.2, 129.0, 124.0, 67.1, 31.3, 29.2, 25.4, 22.6, 14.1. HRMS (ESI-TOF): Anal Calcd. For.  $\text{C}_{18}\text{H}_{20}\text{BrClN}_2\text{O}_5\text{S}_2+\text{Na}^+$ : 546.9558, found: 546.9555. IR (neat,  $\text{cm}^{-1}$ ):  $\nu$  3342, 3086, 2959, 2925, 2858, 1538, 1321, 1140, 994, 841, 799, 641.

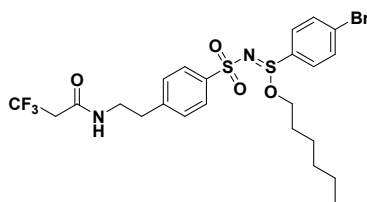

#### 4y

petroleum ether / ethyl acetate = 15:1 – 2:1, a yellow solid, 65% yield (77.5 mg). mp: 168 – 170 °C.  $^1\text{H}$  NMR (400 MHz, Chloroform-*d*)  $\delta$  7.82 – 7.78 (m, 2H), 7.70 – 7.61 (m, 4H), 7.28 – 7.26 (m, 2H), 6.52 (t,  $J = 5.9$  Hz, 1H), 3.92 (dt,  $J = 9.6, 6.6$  Hz, 1H), 3.51 – 3.44 (m, 3H), 3.01 (q,  $J = 10.6$  Hz, 2H), 2.86 (t,  $J = 6.9$  Hz, 2H), 1.48 – 1.40 (m, 2H), 1.24 – 1.11 (m, 6H), 0.82 (t,  $J = 7.1$  Hz, 3H).  $^{13}\text{C}$  NMR (100 MHz, Chloroform-*d*)  $\delta$  163.0 (q,  $J = 3.8$  Hz), 143.4, 141.2, 134.4, 132.9, 129.3, 128.8, 128.5, 126.5, 124.0 (q,  $J = 276.8$  Hz), 66.2, 41.2 (q,  $J = 29.1$  Hz), 40.5, 35.0, 31.1, 28.8, 25.1, 22.3, 13.8.  $^{19}\text{F}$  NMR (376 MHz,

Chloroform-*d*)  $\delta$  -62.95 (s, 3F). **HRMS** (ESI-TOF): Anal Calcd. For.  $C_{23}H_{28}BrF_3N_2O_4S_2+H^+$ : 599.0679, found: 599.0680. **IR** (neat,  $cm^{-1}$ ):  $\nu$  3350, 3198, 3089, 2956, 2930, 2870, 1663, 1158, 1133, 1067, 572, 542.

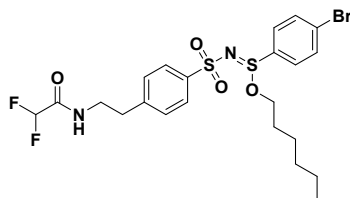

#### 4z

petroleum ether / ethyl acetate = 15:1 – 2:1, a viscous waxy oil, 61% yield (68.8 mg). **<sup>1</sup>H NMR** (400 MHz, Chloroform-*d*)  $\delta$  7.85 – 7.83 (m, 2H), 7.69 – 7.61 (m, 4H), 7.29 – 7.27 (m, 2H), 6.80 (t,  $J$  = 6.3 Hz, 1H), 5.83 (t,  $J$  = 54.3 Hz, 1H), 3.92 (dt,  $J$  = 9.6, 6.6 Hz, 1H), 3.55 (q,  $J$  = 6.8 Hz, 2H), 3.48 (dt,  $J$  = 9.6, 6.7 Hz, 1H), 2.90 (t,  $J$  = 7.2 Hz, 2H), 1.48 – 1.41 (m, 2H), 1.23 – 1.12 (m, 6H), 0.82 (t,  $J$  = 7.0 Hz, 3H). **<sup>13</sup>C NMR** (100 MHz, Chloroform-*d*)  $\delta$  162.7 (t,  $J$  = 24.8 Hz), 142.7, 141.5, 134.5, 132.9, 129.2, 128.8, 128.4, 126.6, 108.3 (t,  $J$  = 251.9 Hz), 66.2, 40.0, 34.9, 31.0, 28.8, 25.0, 22.3, 13.8. **<sup>19</sup>F NMR** (376 MHz, Chloroform-*d*)  $\delta$  -126.20 (s, 2F). **HRMS** (ESI-TOF): Anal Calcd. For.  $C_{22}H_{27}BrF_2N_2O_4S_2+Na^+$ : 589.0436, found: 589.0436. **IR** (neat,  $cm^{-1}$ ):  $\nu$  3322, 3088, 2955, 2929, 2859, 1697, 1292, 1025, 1000, 822, 688.

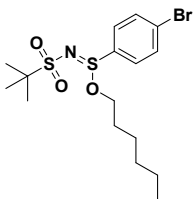

#### 4aa

petroleum ether / ethyl acetate = 15:1 – 8:1, a yellow solid, 71% yield (60.1 mg). mp: 49 – 51 °C. **<sup>1</sup>H NMR** (400 MHz, Chloroform-*d*)  $\delta$  7.76 – 7.70 (m, 4H), 4.18 (dt,  $J$  = 9.8, 6.6 Hz, 1H), 3.71 (dt,  $J$  = 9.8, 6.7 Hz, 1H), 1.67 – 1.60 (m, 2H), 1.41 (s, 9H), 1.31 – 1.21 (m, 6H), 0.84 (t,  $J$  = 6.8 Hz, 3H). **<sup>13</sup>C NMR** (100 MHz, Chloroform-*d*)  $\delta$  135.7, 132.9, 128.6, 128.2, 66.9, 59.3, 31.2, 29.1, 25.2, 24.5, 22.4, 13.9. **HRMS** (ESI-TOF): Anal Calcd. For.  $C_{16}H_{26}BrNO_3S_2+Na^+$ : 446.0430, found: 446.0439. **IR** (neat,  $cm^{-1}$ ):  $\nu$  3171, 3086, 2957, 2932, 2869, 1472, 1281, 1113, 1001, 989, 909, 735, 667.

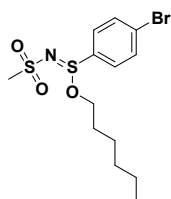

#### 4ab

petroleum ether / ethyl acetate = 15:1 – 6:1, a yellow solid, 64% yield (48.8 mg). mp: 38 – 40 °C. **<sup>1</sup>H NMR** (400 MHz, Chloroform-*d*) δ 7.73 – 7.69 (m, 4H), 4.14 (dt, *J* = 9.8, 6.6 Hz, 1H), 3.63 (dt, *J* = 9.7, 6.6 Hz, 1H), 3.07 (s, 3H), 1.66 – 1.59 (m, 2H), 1.31 – 1.19 (m, 6H), 0.84 (t, *J* = 6.8 Hz, 3H). **<sup>13</sup>C NMR** (100 MHz, Chloroform-*d*) δ 134.8, 132.9, 128.7, 128.4, 66.4, 43.3, 31.1, 29.1, 25.2, 22.3, 13.8. **HRMS** (ESI-TOF): Anal Calcd. For. C<sub>18</sub>H<sub>21</sub>BrClNO<sub>3</sub>S<sub>2</sub>+H<sup>+</sup>: 384.0121, found: 384.0103. **IR** (neat, cm<sup>-1</sup>): ν 3088, 2957, 2926, 2857, 1325, 1137, 1003, 928, 805, 719.

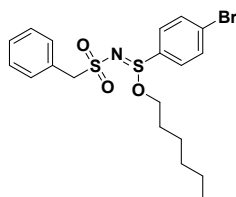

#### 4ac

petroleum ether / ethyl acetate = 15:1 – 7:1, a yellow solid, 72% yield (65.8 mg). mp: 110-112 °C. **<sup>1</sup>H NMR** (400 MHz, Chloroform-*d*) δ 7.61 – 7.58 (m, 2H), 7.47 – 7.43 (m, 2H), 7.24 – 7.17 (m, 3H), 7.15 – 7.11 (m, 2H), 4.33 – 4.21 (m, 2H), 3.93 (dt, *J* = 9.7, 6.6 Hz, 1H), 3.47 (dt, *J* = 9.7, 6.6 Hz, 1H), 1.50 – 1.43 (m, 2H), 1.19 – 1.11 (m, 6H), 0.77 (t, *J* = 6.8 Hz, 3H). **<sup>13</sup>C NMR** (100 MHz, Chloroform-*d*) δ 135.2, 132.6, 130.9, 130.1, 128.5, 128.4, 128.3, 128.1, 67.1, 60.7, 31.1, 29.0, 25.0, 22.3, 13.8. **HRMS** (ESI-TOF): Anal Calcd. For. C<sub>19</sub>H<sub>24</sub>BrNO<sub>3</sub>S<sub>2</sub>+H<sup>+</sup>: 458.0454, found: 458.0438. **IR** (neat, cm<sup>-1</sup>): ν 3381, 3314, 3274, 3246, 1321, 1145, 1123, 1001, 778, 740, 697.

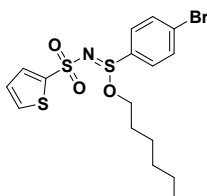

#### 4ad

petroleum ether / ethyl acetate = 15:1 – 5:1, a viscous waxy oil, 88% yield (79.0 mg). **<sup>1</sup>H NMR** (400 MHz, Chloroform-*d*)  $\delta$  7.70 – 7.65 (m, 4H), 7.62 – 7.61 (m, 1H), 7.50 – 7.48 (m, 1H), 7.02 – 7.00 (m, 1H), 3.99 (dt, *J* = 9.6, 6.6 Hz, 1H), 3.50 (dt, *J* = 9.6, 6.7 Hz, 1H), 1.50 – 1.44 (m, 2H), 1.24 – 1.12 (m, 6H), 0.82 (t, *J* = 7.0 Hz, 3H). **<sup>13</sup>C NMR** (100 MHz, Chloroform-*d*)  $\delta$  144.6, 134.3, 132.8, 130.8, 130.6, 128.8, 128.4, 126.9, 66.4, 31.0, 28.8, 25.0, 22.2, 13.8. **HRMS** (ESI-TOF): Anal Calcd. For. C<sub>16</sub>H<sub>20</sub>BrNO<sub>3</sub>S<sub>3</sub>+Na<sup>+</sup>: 471.9681, found: 471.9677. **IR** (neat, cm<sup>-1</sup>):  $\nu$  3089, 2955, 2926, 2858, 1312, 1142, 1019, 1000, 890, 716, 667.

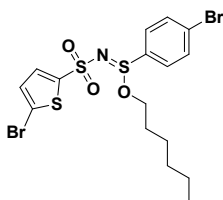

#### 4ae

petroleum ether / ethyl acetate = 20:1 – 10:1, a light yellow solid, 81% yield (85.4 mg). mp: 50 – 52 °C. **<sup>1</sup>H NMR** (400 MHz, Chloroform-*d*)  $\delta$  7.71 – 7.65 (m, 4H), 7.37 – 7.36 (m, 1H), 6.99 – 6.98 (m, 1H), 4.01 (dt, *J* = 9.5, 6.6 Hz, 1H), 3.50 (dt, *J* = 9.6, 6.7 Hz, 1H), 1.53 – 1.45 (m, 2H), 1.25 – 1.15 (m, 6H), 0.82 (t, *J* = 7.0 Hz, 3H). **<sup>13</sup>C NMR** (100 MHz, Chloroform-*d*)  $\delta$  145.4, 134.0, 132.9, 130.6, 129.8, 128.8, 128.6, 118.6, 66.5, 31.0, 28.8, 25.0, 22.3, 13.8. **HRMS** (ESI-TOF): Anal Calcd. For. C<sub>16</sub>H<sub>19</sub>Br<sub>2</sub>NO<sub>3</sub>S<sub>3</sub>+H<sup>+</sup>: 529.8947, found: 529.8944. **IR** (neat, cm<sup>-1</sup>):  $\nu$  3092, 3076, 2951, 2924, 2854, 1319, 1141, 989, 794, 605, 588.

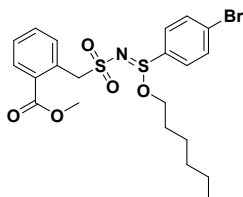

#### 4af

petroleum ether / ethyl acetate = 15:1 – 6:1, a viscous waxy oil, 75% yield (77.3 mg). **<sup>1</sup>H NMR** (400 MHz, Chloroform-*d*)  $\delta$  7.85 – 7.83 (m, 1H), 7.66 – 7.62 (m, 2H), 7.53 – 7.50 (m, 2H), 7.45 – 7.42 (m, 1H), 7.39 – 7.31 (m, 2H), 5.00 (dd, *J* = 140.6, 13.4 Hz, 2H), 4.02 (dt, *J* = 9.8, 6.6 Hz, 1H), 3.70 (s, 3H), 3.53 (dt, *J* = 9.8, 6.7 Hz, 1H), 1.56 – 1.49 (m, 2H), 1.24 – 1.14 (m, 6H), 0.81 (t, *J* = 6.9 Hz, 3H). **<sup>13</sup>C**

**NMR** (100 MHz, Chloroform-*d*)  $\delta$  167.3, 135.2, 133.3, 132.5, 131.8, 131.1, 130.78, 130.75, 128.5, 128.2, 128.0, 66.9, 57.4, 52.0, 31.0, 29.0, 25.0, 22.3, 13.8. **HRMS** (ESI-TOF): Anal Calcd. For.  $C_{21}H_{26}BrNO_5S_2+Na^+$ : 538.0328, found: 538.0326. **IR** (neat,  $cm^{-1}$ ):  $\nu$  3088, 2956, 2929, 2859, 1707, 1471, 1186, 1142, 1066, 926, 817, 737.

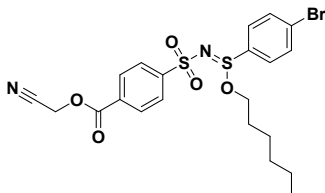

#### 4ag

petroleum ether / ethyl acetate = 15:1 – 5:1, a yellow solid, 74% yield (77.8 mg). mp: 82 – 84 °C. **<sup>1</sup>H NMR** (400 MHz, Chloroform-*d*)  $\delta$  8.16 – 8.12 (m, 2H), 8.07 – 8.04 (m, 2H), 7.71 – 7.63 (m, 4H), 4.98 (s, 2H), 3.92 (dt,  $J = 9.6, 6.6$  Hz, 1H), 3.49 (dt,  $J = 9.6, 6.6$  Hz, 1H), 1.48 – 1.40 (m, 2H), 1.23 – 1.10 (m, 6H), 0.82 (t,  $J = 7.1$  Hz, 3H). **<sup>13</sup>C NMR** (100 MHz, Chloroform-*d*)  $\delta$  163.7, 148.2, 134.2, 133.0, 130.8, 130.5, 128.74, 128.68, 126.6, 114.0, 66.4, 49.2, 31.0, 28.8, 25.0, 22.3, 13.8. **HRMS** (ESI-TOF): Anal Calcd. For.  $C_{21}H_{23}BrN_2O_5S_2+Na^+$ : 551.0104, found: 551.0103. **IR** (neat,  $cm^{-1}$ ):  $\nu$  3089, 2956, 2929, 2859, 1738, 1261, 1152, 999, 760, 730, 692, 621.

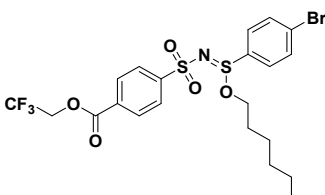

#### 4ah

petroleum ether / ethyl acetate = 15:1 – 8:1, a yellow oil, 75% yield (85.4 mg). **<sup>1</sup>H NMR** (400 MHz, Chloroform-*d*)  $\delta$  8.18 – 8.15 (m, 2H), 8.07 – 8.04 (m, 2H), 7.71 – 7.63 (m, 4H), 4.71 (q,  $J = 8.4$  Hz, 2H), 3.92 (dt,  $J = 9.6, 6.6$  Hz, 1H), 3.48 (dt,  $J = 9.5, 6.6$  Hz, 1H), 1.47 – 1.39 (m, 2H), 1.23 – 1.11 (m, 6H), 0.81 (t,  $J = 7.1$  Hz, 3H). **<sup>13</sup>C NMR** (100 MHz, Chloroform-*d*)  $\delta$  163.6, 148.0, 134.2, 133.0, 131.3, 130.5, 128.8, 128.6, 126.6, 122.8 (q,  $J = 277.2$  Hz), 66.3, 61.0 (q,  $J = 36.9$  Hz), 31.0, 28.8, 25.0, 22.2, 13.8. **<sup>19</sup>F NMR** (376 MHz, Chloroform-*d*)  $\delta$  -73.62 (s, 3F). **HRMS** (ESI-TOF): Anal Calcd. For.

$C_{21}H_{23}BrF_3NO_5S_2+H^+$ : 570.0226, found: 570.0218. **IR** (neat,  $cm^{-1}$ ):  $\nu$  2957, 2931, 2860, 1740, 1290, 1252, 1152, 1104, 908, 760, 620.

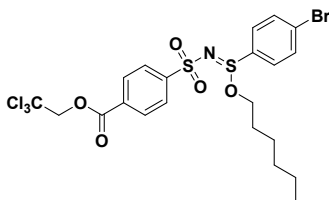

#### 4ai

petroleum ether / ethyl acetate = 20:1 – 10:1, a viscous waxy oil, 81% yield (100.0 mg).  **$^1H$  NMR** (400 MHz, Chloroform-*d*)  $\delta$  8.22 – 8.19 (m, 2H), 8.07 – 8.04 (m, 2H), 7.69 – 7.64 (m, 4H), 4.96 (s, 2H), 3.92 (dt,  $J$  = 9.6, 6.6 Hz, 1H), 3.47 (dt,  $J$  = 9.6, 6.6 Hz, 1H), 1.46 – 1.48 (m, 2H), 1.22 – 1.08 (m, 6H), 0.80 (t,  $J$  = 7.1 Hz, 3H).  **$^{13}C$  NMR** (100 MHz, Chloroform-*d*)  $\delta$  163.5, 147.9, 134.2, 132.9, 131.6, 130.5, 128.7, 128.6, 126.6, 94.6, 74.5, 66.2, 31.0, 28.8, 25.0, 22.2, 13.8. **HRMS** (ESI-TOF): Anal Calcd. For.  $C_{21}H_{23}BrCl_3NO_5S_2+Na^+$ : 641.9139, found: 641.9138. **IR** (neat,  $cm^{-1}$ ):  $\nu$  3089, 2956, 2928, 2859, 1740, 1256, 1151, 1000, 733, 1712, 689.

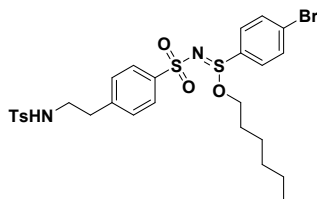

#### 4aj

petroleum ether / ethyl acetate = 15:1 – 3:1, a light yellow solid, 62% yield (79.4 mg). mp: 126 – 128 °C.  **$^1H$  NMR** (400 MHz, Chloroform-*d*)  $\delta$  7.81 – 7.79 (m, 2H), 7.68 – 7.62 (m, 6H), 7.26 – 7.23 (m, 2H), 7.19 – 7.17 (m, 2H), 5.06 – 5.00 (m, 1H), 3.94 (dt,  $J$  = 9.6, 6.6 Hz, 1H), 3.48 (dt,  $J$  = 9.6, 6.7 Hz, 1H), 3.16 (q,  $J$  = 6.8 Hz, 2H), 2.80 (t,  $J$  = 7.1 Hz, 2H), 2.39 (s, 3H), 1.48 – 1.41 (m, 2H), 1.24 – 1.11 (m, 6H), 0.81 (t,  $J$  = 7.0 Hz, 3H).  **$^{13}C$  NMR** (100 MHz, Chloroform-*d*)  $\delta$  143.5, 142.6, 141.5, 136.7, 134.6, 132.8, 129.7, 129.2, 128.8, 128.3, 126.9, 126.6, 66.2, 43.7, 35.7, 31.0, 28.8, 25.0, 22.3, 21.4, 13.8. **HRMS** (ESI-TOF): Anal Calcd. For.  $C_{27}H_{33}BrN_2O_5S_3+Na^+$ : 665.0607, found: 665.0593. **IR** (neat,  $cm^{-1}$ ):  $\nu$  3380, 3272, 2956, 2927, 2857, 1329, 1144, 813, 550.

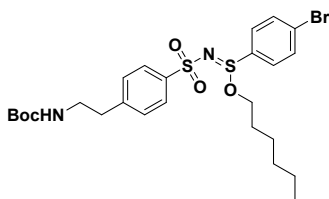

#### 4ak

petroleum ether / ethyl acetate = 15:1 – 4:1, a viscous waxy oil, 74% yield (86.7mg). **<sup>1</sup>H NMR** (400 MHz, Chloroform-*d*)  $\delta$  7.89 – 7.85 (m, 2H), 7.69 – 7.64 (m, 4H), 7.29 – 7.27 (m, 2H), 4.58 (s, 1H), 3.94 (dt,  $J$  = 9.6, 6.5 Hz, 1H), 3.48 (dt,  $J$  = 9.6, 6.6 Hz, 1H), 3.35 (q,  $J$  = 6.8 Hz, 2H), 2.83 (t,  $J$  = 7.0 Hz, 2H), 1.47 – 1.42 (m, 2H), 1.40 (s, 9H), 1.24 – 1.12 (m, 6H), 0.83 (t,  $J$  = 7.1 Hz, 3H). **<sup>13</sup>C NMR** (100 MHz, Chloroform-*d*)  $\delta$  155.7, 143.6, 141.3, 134.7, 132.8, 129.2, 128.8, 128.3, 126.6, 79.4, 66.1, 41.4, 36.0, 31.1, 28.9, 28.3, 25.1, 22.3, 13.9. **HRMS** (ESI-TOF): Anal Calcd. For. C<sub>25</sub>H<sub>35</sub>BrN<sub>2</sub>O<sub>5</sub>S<sub>2</sub>+Na<sup>+</sup>: 611.1043, found: 611.1043. **IR** (neat, cm<sup>-1</sup>):  $\nu$  3376, 2957, 2930, 2870, 1700, 1148, 1024, 1000, 794, 732.

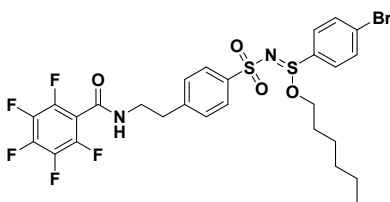

#### 4al

petroleum ether / ethyl acetate = 15:1 – 3:1, a viscous waxy oil, 90% yield (122.4 mg). **<sup>1</sup>H NMR** (400 MHz, Chloroform-*d*)  $\delta$  7.71 – 7.64 (m, 4H), 7.59 – 7.56 (m, 2H), 7.31 – 7.29 (m, 2H), 7.07 (t,  $J$  = 5.9 Hz, 1H), 3.85 (dt,  $J$  = 9.6, 6.6 Hz, 1H), 3.65 (q,  $J$  = 6.6 Hz, 2H), 3.42 (dt,  $J$  = 9.6, 6.7 Hz, 1H), 2.95 (t,  $J$  = 6.9 Hz, 2H), 1.44 – 1.37 (m, 2H), 1.21 – 1.10 (m, 6H), 0.80 (t,  $J$  = 7.1 Hz, 3H). **<sup>13</sup>C NMR** (100 MHz, Chloroform-*d*)  $\delta$  157.6, 143.3, 141.0, 134.3, 132.8, 129.3, 128.6, 128.4, 126.3, 66.2, 40.9, 34.8, 31.0, 28.7, 25.0, 22.2, 13.7. **<sup>19</sup>F NMR** (376 MHz, Chloroform-*d*)  $\delta$  -140.82 – -140.92 (m, 2F), -151.79 – -151.90 (m, 1F), -160.49 – -160.64 (m, 2F). **HRMS** (ESI-TOF): Anal Calcd. For. C<sub>27</sub>H<sub>26</sub>BrF<sub>5</sub>N<sub>2</sub>O<sub>4</sub>S<sub>2</sub>+H<sup>+</sup>: 681.0511, found: 681.0513. **IR** (neat, cm<sup>-1</sup>):  $\nu$  3317, 2932, 2860, 1683, 1517, 1501, 1322, 1146, 990, 797, 732.



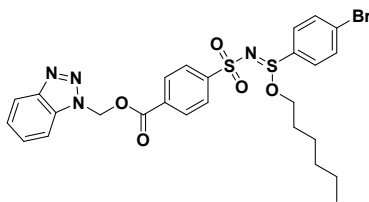

#### 4am

petroleum ether / ethyl acetate = 15:1 – 3:1, a light yellow solid, 67% yield (82.8 mg). mp: 130 – 132 °C.

**<sup>1</sup>H NMR** (400 MHz, Chloroform-*d*) δ 8.12 – 8.09 (m, 2H), 8.06 – 8.04 (m, 1H), 7.99 – 7.96 (m, 2H), 7.86 – 7.83 (m, 1H), 7.67 – 7.57 (m, 4H), 7.57 – 7.53 (m, 1H), 7.42 – 7.38 (m, 1H), 6.84 (s, 2H), 3.89 (dt, *J* = 9.6, 6.6 Hz, 1H), 3.46 (dt, *J* = 9.6, 6.6 Hz, 1H), 1.44 – 1.36 (m, 2H), 1.16 – 1.04 (m, 6H), 0.75 (t, *J* = 7.0 Hz, 3H). **<sup>13</sup>C NMR** (100 MHz, Chloroform-*d*) δ 164.2, 148.0, 145.9, 134.1, 132.9, 132.7, 131.3, 130.5, 128.7, 128.6, 128.5, 126.5, 124.6, 120.0, 109.9, 68.5, 66.4, 30.9, 28.7, 24.9, 22.2, 13.7. **HRMS** (ESI-TOF): Anal Calcd. For. C<sub>26</sub>H<sub>27</sub>BrN<sub>4</sub>O<sub>5</sub>S<sub>2</sub>+Na<sup>+</sup>: 643.0478, found: 643.0463. **IR** (neat, cm<sup>-1</sup>): ν 3085, 2957, 2926, 2860, 1737, 1330, 1143, 1002, 739, 548.

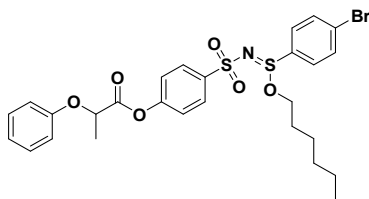

#### 4an

petroleum ether / ethyl acetate = 15:1 – 5:1, a viscous waxy oil, 78% yield (94.7 mg). **<sup>1</sup>H NMR** (400 MHz, Chloroform-*d*) δ 7.98 – 7.94 (m, 2H), 7.69 – 7.62 (m, 4H), 7.32 – 7.27 (m, 2H), 7.16 – 7.12 (m, 2H), 7.02 – 6.93 (m, 1H), 6.97 – 6.92 (m, 2H), 4.99 (q, *J* = 6.8 Hz, 1H), 3.92 (dt, *J* = 9.6, 6.6 Hz, 1H), 3.47 (dt, *J* = 9.6, 6.7 Hz, 1H), 1.77 (d, *J* = 6.8 Hz, 3H), 1.48 – 1.41 (m, 2H), 1.25 – 1.13 (m, 6H), 0.82 (t, *J* = 7.1 Hz, 3H). **<sup>13</sup>C NMR** (100 MHz, Chloroform-*d*) δ 170.1, 157.2, 152.7, 141.0, 134.4, 132.8, 129.6, 128.8, 128.4, 128.0, 121.9, 121.7, 115.1, 72.4, 66.2, 31.0, 28.8, 25.0, 22.2, 18.4, 13.8. **HRMS** (ESI-TOF): Anal Calcd. For. C<sub>27</sub>H<sub>30</sub>BrNO<sub>6</sub>S<sub>2</sub>+Na<sup>+</sup>: 632.0570, found: 632.0565. **IR** (neat, cm<sup>-1</sup>): ν 2955, 2930, 2870, 1774, 1588, 1491, 1146, 1089, 1024, 1000, 753, 689.

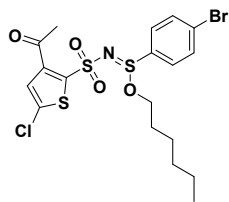

#### 4ao

petroleum ether / ethyl acetate = 15:1 – 6:1, a viscous waxy oil, 74% yield (77.7 mg). **<sup>1</sup>H NMR** (400 MHz, Chloroform-*d*)  $\delta$  7.68 – 7.63 (m, 4H), 7.15 (s, 1H), 4.13 (dt, *J* = 9.7, 6.6 Hz, 1H), 3.66 (dt, *J* = 9.7, 6.6 Hz, 1H), 2.49 (s, 3H), 1.62 – 1.56 (m, 2H), 1.26 – 1.17 (m, 6H), 0.82 (t, *J* = 6.7 Hz, 3H). **<sup>13</sup>C NMR** (100 MHz, Chloroform-*d*)  $\delta$  192.7, 145.9, 138.6, 134.7, 133.8, 132.7, 128.7, 128.4, 128.3, 67.5, 31.0, 29.9, 29.0, 25.0, 22.3, 13.8. **HRMS** (ESI-TOF): Anal Calcd. For. C<sub>18</sub>H<sub>21</sub>BrClNO<sub>4</sub>S<sub>3</sub>+Na<sup>+</sup>: 549.9377, found: 549.9387. **IR** (neat, cm<sup>-1</sup>):  $\nu$  2955, 2925, 2857, 1685, 1406, 1307, 1139, 1021, 1002, 732, 643.

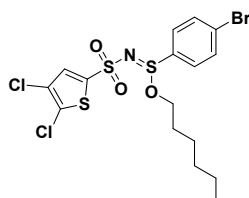

#### 4ap

petroleum ether / ethyl acetate = 20:1 – 10:1, a white solid, 87% yield (89.9 mg). mp: 58 – 60 °C. **<sup>1</sup>H NMR** (400 MHz, Chloroform-*d*)  $\delta$  7.75 – 7.67 (m, 4H), 7.40 (s, 1H), 4.04 (dt, *J* = 9.6, 6.6 Hz, 1H), 3.54 (dt, *J* = 9.5, 6.6 Hz, 1H), 1.57 – 1.50 (m, 2H), 1.27 – 1.16 (m, 6H), 0.85 (t, *J* = 6.9 Hz, 3H). **<sup>13</sup>C NMR** (100 MHz, Chloroform-*d*)  $\delta$  141.2, 133.8, 133.1, 130.1, 129.4, 128.9, 128.8, 124.2, 66.8, 31.1, 28.9, 25.1, 22.3, 13.9. **HRMS** (ESI-TOF): Anal Calcd. For. C<sub>16</sub>H<sub>18</sub>BrCl<sub>2</sub>NO<sub>3</sub>S<sub>3</sub>+H<sup>+</sup>: 517.9082, found: 517.9073. **IR** (neat, cm<sup>-1</sup>):  $\nu$  3088, 2956, 2916, 2855, 1321, 1138, 986, 877, 616, 539.

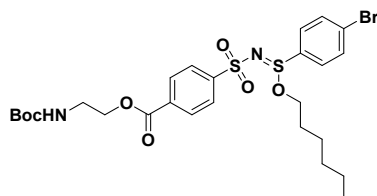

#### 4aq

petroleum ether / ethyl acetate = 15:1 – 4:1, a viscous waxy oil, 74% yield (93.3 mg). **<sup>1</sup>H NMR** (400 MHz, Chloroform-*d*)  $\delta$  8.13 – 8.10 (m, 2H), 8.00 – 7.98 (m, 2H), 7.68 – 7.62 (m, 4H), 4.91 (s, 1H), 4.36

(t,  $J = 5.4$  Hz, 2H), 3.91 (dt,  $J = 9.6, 6.6$  Hz, 1H), 3.53 – 3.45(m, 3H), 1.45 – 1.41 (m, 2H), 1.39 (s, 9H), 1.22 – 1.09 (m, 6H), 0.81 (t,  $J = 7.1$  Hz, 3H).  $^{13}\text{C NMR}$  (100 MHz, Chloroform-*d*)  $\delta$  165.1, 155.8, 147.2, 134.3, 132.93, 132.89, 130.2, 128.8, 128.6, 126.4, 79.6, 66.3, 64.8, 39.5, 31.0, 28.8, 28.3, 25.0, 22.3, 13.8. **HRMS** (ESI-TOF): Anal Calcd. For.  $\text{C}_{26}\text{H}_{35}\text{BrN}_2\text{O}_7\text{S}_2+\text{Na}^+$ : 655.0941, found: 655.0940. **IR** (neat,  $\text{cm}^{-1}$ ):  $\nu$  2957, 2930, 2860, 1715, 1268, 1152, 1088, 1025, 999, 762, 729, 692, 620.

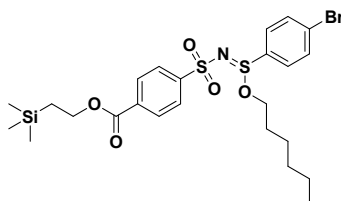

#### 4ar

petroleum ether / ethyl acetate = 20:1 – 10:1, a light red solid, 71% yield (83.4 mg). mp: 58 – 60 °C.  $^1\text{H NMR}$  (400 MHz, Chloroform-*d*)  $\delta$  8.12 – 8.09 (m, 2H), 8.01 – 7.99 (m, 2H), 7.68 – 7.62 (m, 4H), 4.42 – 4.38 (m, 2H), 3.88 (dt,  $J = 9.4, 6.6$  Hz, 1H), 3.43 (dt,  $J = 9.5, 6.6$  Hz, 1H), 1.43 – 1.35 (m, 2H), 1.22 – 1.09 (m, 8H), 0.80 (t,  $J = 7.1$  Hz, 3H), 0.05 (s, 9H).  $^{13}\text{C NMR}$  (100 MHz, Chloroform-*d*)  $\delta$  165.3, 146.9, 134.3, 133.6, 132.9, 129.9, 128.7, 128.5, 126.3, 66.1, 63.8, 31.0, 28.7, 25.0, 22.2, 17.3, 13.8, -1.6. **HRMS** (ESI-TOF): Anal Calcd. For.  $\text{C}_{24}\text{H}_{34}\text{BrNO}_5\text{S}_2\text{Si}+\text{Na}^+$ : 610.0724, found: 610.0724. **IR** (neat,  $\text{cm}^{-1}$ ):  $\nu$  2953, 2928, 2856, 1713, 1320, 1273, 1106, 994, 827, 800, 694, 615.

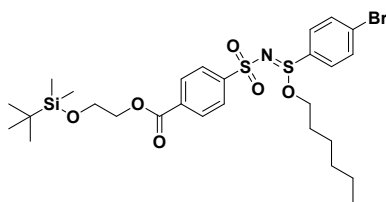

#### 4as

petroleum ether / ethyl acetate = 20:1 – 10:1, a white solid, 80% yield (103.2 mg). mp: 68 – 70 °C.  $^1\text{H NMR}$  (400 MHz, Chloroform-*d*)  $\delta$  8.14 – 8.11 (m, 2H), 8.03 – 7.99 (m, 2H), 7.69 – 7.62 (m, 4H), 4.40 – 4.37 (m, 2H), 3.93 – 3.87 (m, 3H), 3.48 – 3.43 (m, 1H), 1.45 – 1.37 (m, 2H), 1.22 – 1.08 (m, 6H), 0.86 (s, 9H), 0.80 (t,  $J = 7.1$  Hz, 3H), 0.04 (s, 6H).  $^{13}\text{C NMR}$  (100 MHz, Chloroform-*d*)  $\delta$  165.2, 147.1, 134.3, 133.2, 132.9, 130.1, 128.8, 128.5, 126.3, 66.6, 66.2, 61.1, 31.0, 28.8, 25.7, 25.0, 22.3, 18.2, 13.8, -5.4.

**HRMS** (ESI-TOF): Anal Calcd. For.  $C_{27}H_{40}BrNO_6S_2Si+H^+$ : 648.1302, found: 648.1295. **IR** (neat,  $cm^{-1}$ ):  $\nu$  3091, 2951, 2925, 2852, 1712, 1320, 1274, 994, 799, 615, 516.

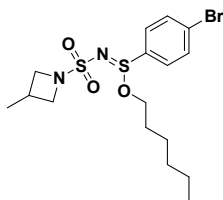

#### 4at

petroleum ether / ethyl acetate = 15:1 – 6:1, a viscous waxy oil, 63% yield (54.9 mg).  **$^1H$  NMR** (400 MHz, Chloroform-*d*)  $\delta$  7.77 – 7.70 (m, 4H), 4.19 (dt,  $J = 9.8, 6.6$  Hz, 1H), 3.98 – 3.90 (m, 2H), 3.71 (dt,  $J = 9.7, 6.7$  Hz, 1H), 3.54 – 3.40 (m, 1H), 3.45 – 3.41 (m, 1H), 2.67 – 2.54 (m, 1H), 1.67 – 1.60 (m, 2H), 1.30 – 1.16 (m, 6H), 1.17 (d,  $J = 6.8$  Hz, 3H), 0.84 (t,  $J = 6.9$  Hz, 3H).  **$^{13}C$  NMR** (100 MHz, Chloroform-*d*)  $\delta$  135.4, 132.8, 128.7, 128.2, 67.0, 57.8, 31.1, 29.2, 25.2, 23.5, 22.3, 18.9, 13.8. **HRMS** (ESI-TOF): Anal Calcd. For.  $C_{16}H_{25}BrN_2O_3S_2+H^+$ : 437.0563, found: 437.0571. **IR** (neat,  $cm^{-1}$ ):  $\nu$  3086, 2957, 2928, 2871, 1471, 1324, 1152, 1021, 1000, 898, 731, 632.

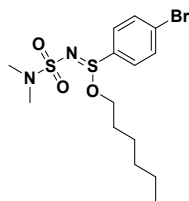

#### 4au

petroleum ether / ethyl acetate = 20:1 – 8:1, a colorless oil, 74% yield (60.7 mg).  **$^1H$  NMR** (400 MHz, Chloroform-*d*)  $\delta$  7.74 – 7.69 (m, 4H), 4.16 (dt,  $J = 9.8, 6.6$  Hz, 1H), 3.67 (dt,  $J = 9.8, 6.7$  Hz, 1H), 2.77 (s, 6H), 1.66 – 1.59 (m, 2H), 1.30 – 1.21 (m, 6H), 0.84 (t,  $J = 6.8$  Hz, 3H).  **$^{13}C$  NMR** (100 MHz, Chloroform-*d*)  $\delta$  135.5, 132.8, 128.7, 128.1, 66.6, 38.8, 31.1, 29.2, 25.2, 22.3, 13.8. **HRMS** (ESI-TOF): Anal Calcd. For.  $C_{14}H_{23}BrN_2O_3S_2+H^+$ : 411.0407, found: 411.0407 **IR** (neat,  $cm^{-1}$ ):  $\nu$  3086, 2951, 2929, 2871, 1469, 1140, 1028, 1004, 701.

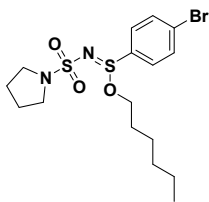

#### 4av

petroleum ether / ethyl acetate = 15:1 – 5:1, a colorless oil, 78% yield (68.0 mg). **<sup>1</sup>H NMR** (400 MHz, Chloroform-*d*) δ 7.72 – 7.67(m, 4H), 4.14 (dt, *J* = 9.6, 6.6 Hz, 1H), 3.67 (dt, *J* = 9.7, 6.7 Hz, 1H), 3.35 – 3.22 (m, 4H), 1.89 – 1.82 (m, 4H), 1.65 – 1.58 (m, 2H), 1.30 – 1.19 (m, 6H), 0.83 (t, *J* = 6.8 Hz, 3H). **<sup>13</sup>C NMR** (100 MHz, Chloroform-*d*) δ 135.6, 132.7, 128.6, 128.0, 66.5, 48.5, 31.1, 29.2, 25.24, 25.18, 22.3, 13.8. **HRMS** (ESI-TOF): Anal Calcd. For. C<sub>16</sub>H<sub>25</sub>BrN<sub>2</sub>O<sub>3</sub>S<sub>2</sub>+H<sup>+</sup>: 439.0543, found: 439.0542. **IR** (neat, cm<sup>-1</sup>): ν 3086, 2954, 2929, 2859, 1468, 1324, 1142, 1027, 994, 917, 824, 723, 620.

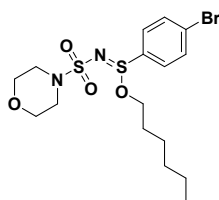

#### 4aw

petroleum ether / ethyl acetate = 15:1 – 4:1, a viscous waxy oil, 75% yield (67.8 mg). **<sup>1</sup>H NMR** (400 MHz, Chloroform-*d*) δ 7.75 – 7.67 (s, 4H), 4.16 (dt, *J* = 9.7, 6.5 Hz, 1H), 3.80 – 3.70 (m, 4H), 3.66 (dt, *J* = 9.7, 6.7 Hz, 1H), 3.79 – 3.71 (m, 4H), 1.66 – 1.59 (m, 2H), 1.31 – 1.19 (m, 6H), 0.84 (t, *J* = 6.8 Hz, 3H). **<sup>13</sup>C NMR** (100 MHz, Chloroform-*d*) δ 135.1, 132.9, 128.6, 128.3, 66.6, 66.0, 46.7, 31.1, 29.1, 25.2, 22.3, 13.8. **HRMS** (ESI-TOF): Anal Calcd. For. C<sub>16</sub>H<sub>25</sub>BrN<sub>2</sub>O<sub>4</sub>S<sub>2</sub>+Na<sup>+</sup>: 475.0332, found: 475.0324. **IR** (neat, cm<sup>-1</sup>): ν 3086, 2956, 2923, 2856, 1319, 1294, 1260, 1148, 1113, 1029, 1003, 939, 764, 720.

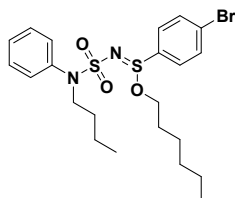

#### 4ax

petroleum ether / ethyl acetate = 20:1 – 12:1, a yellow liquid, 79% yield (81.2 mg). **<sup>1</sup>H NMR** (400 MHz, Chloroform-*d*) δ 7.71 – 7.67 (m, 2H), 7.63 – 7.59 (m, 2H), 7.38 – 7.35 (m, 2H), 7.32 – 7.27 (m, 2H), 7.25

– 7.21 (m, 1H), 4.02 (dt,  $J = 9.8, 6.6$  Hz, 1H), 3.76 – 3.61 (m, 2H), 3.54 (dt,  $J = 9.8, 6.7$  Hz, 1H), 1.59 – 1.52 (m, 2H), 1.48 – 1.41 (m, 2H), 1.38 – 1.31 (m, 2H), 1.28 – 1.18 (m, 6H), 0.85 (t,  $J = 7.3$  Hz, 6H).  $^{13}\text{C NMR}$  (100 MHz, Chloroform- $d$ )  $\delta$  140.8, 135.6, 132.6, 128.8, 128.6, 128.3, 128.0, 127.2, 67.1, 50.9, 31.1, 30.3, 29.1, 25.1, 22.3, 19.7, 13.8, 13.6. **HRMS** (ESI-TOF): Anal Calcd. For.  $\text{C}_{22}\text{H}_{31}\text{BrN}_2\text{O}_3\text{S}_2 + \text{H}^+$ : 515.1033, found: 515.1028. **IR** (neat,  $\text{cm}^{-1}$ ):  $\nu$  3087, 2956, 2930, 2870, 1326, 1138, 1002, 883, 695.

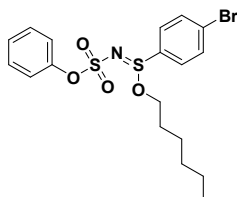

#### 4ay

petroleum ether / ethyl acetate = 20:1 – 10:1, a colorless liquid, 76% yield (69.8 mg).  $^1\text{H NMR}$  (400 MHz, Chloroform- $d$ )  $\delta$  7.71 – 7.68 (m, 2H), 7.63 – 7.60 (m, 2H), 7.33 – 7.29 (m, 4H), 7.24 – 7.19 (m, 1H), 4.10 (dt,  $J = 9.6, 6.6$  Hz, 1H), 3.61 (dt,  $J = 9.6, 6.7$  Hz, 1H), 1.61 – 1.54 (m, 2H), 1.26 – 1.18 (m, 6H), 0.83 (t,  $J = 6.8$  Hz, 3H).  $^{13}\text{C NMR}$  (100 MHz, Chloroform- $d$ )  $\delta$  150.7, 133.9, 132.9, 129.5, 128.8, 128.7, 126.4, 122.0, 67.9, 31.0, 29.0, 25.0, 22.3, 13.8. **HRMS** (ESI-TOF): Anal Calcd. For.  $\text{C}_{18}\text{H}_{22}\text{BrNO}_4\text{S}_2 + \text{Na}^+$ : 482.0066, found: 482.0066. **IR** (neat,  $\text{cm}^{-1}$ ):  $\nu$  2955, 2927, 2859, 1488, 1471, 1347, 1165, 1146, 1022, 1004, 854, 775, 690.

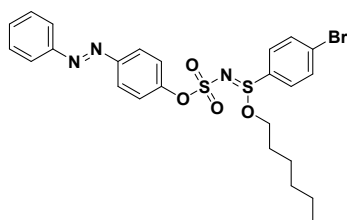

#### 4az

petroleum ether / ethyl acetate = 15:1 – 5:1, a red solid, 60% yield (67.6 mg). mp: 72 – 74 °C.  $^1\text{H NMR}$  (400 MHz, Chloroform- $d$ )  $\delta$  7.92 – 7.88 (m, 4H), 7.73 – 7.70 (m, 2H), 7.67 – 7.64 (m, 2H), 7.54 – 7.45 (m, 5H), 4.13 (dt,  $J = 9.6, 6.6$  Hz, 1H), 3.64 (dt,  $J = 9.6, 6.7$  Hz, 1H), 1.62 – 1.57 (m, 2H), 1.26 – 1.19 (m, 6H), 0.82 (t,  $J = 6.7$  Hz, 3H).  $^{13}\text{C NMR}$  (100 MHz, Chloroform- $d$ )  $\delta$  152.5, 152.4, 150.5, 133.9, 133.0, 131.2, 129.1, 129.0, 128.7, 124.1, 122.9, 122.5, 68.1, 31.1, 29.0, 25.1, 22.3, 13.8. **HRMS** (ESI-

TOF): Anal Calcd. For.  $C_{24}H_{26}BrN_3O_4S_2+Na^+$ : 586.0441, found: 586.0413. **IR** (neat,  $cm^{-1}$ ):  $\nu$  3101, 3068, 2977, 2940, 1720, 1313, 1144, 1004, 730, 689.

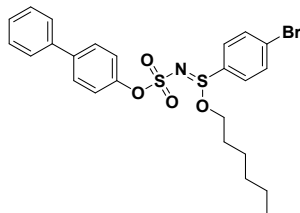

#### 4ba

petroleum ether / ethyl acetate = 15:1 – 5:1, a colorless solid, 65% yield (69.6 mg). mp: 72 – 74 °C.  **$^1H$  NMR** (400 MHz, Chloroform-*d*)  $\delta$  7.72 – 7.69 (m, 2H), 7.67 – 7.63 (m, 2H), 7.55 – 7.50 (m, 4H), 7.46 – 7.42 (m, 2H), 7.40 – 7.33 (m, 3H), 4.14 (dt,  $J$  = 9.6, 6.6 Hz, 1H), 3.65 (dt,  $J$  = 9.6, 6.7 Hz, 1H), 1.64 – 1.58 (m, 2H), 1.29 – 1.17 (m, 6H), 0.83 (t,  $J$  = 6.8 Hz, 3H).  **$^{13}C$  NMR** (100 MHz, Chloroform-*d*)  $\delta$  150.1, 139.9, 139.6, 134.1, 133.0, 128.9, 128.8, 128.7, 128.1, 127.5, 127.0, 122.3, 68.0, 31.1, 29.1, 25.1, 22.3, 13.8. **HRMS** (ESI-TOF): Anal Calcd. For.  $C_{24}H_{26}BrNO_4S_2+Na^+$ : 560.0359, found: 560.0360. **IR** (neat,  $cm^{-1}$ ):  $\nu$  3091, 3077, 2955, 2920, 2863, 1338, 1148, 1001, 869, 758, 694.

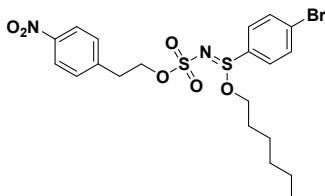

#### 4bb

petroleum ether / ethyl acetate = 15:1 – 3:1, a viscous waxy oil, 83% yield (88.3 mg).  **$^1H$  NMR** (400 MHz, Chloroform-*d*)  $\delta$  8.10 – 8.06 (m, 2H), 7.72 – 7.68 (m, 2H), 7.66 – 7.62 (m, 2H), 7.40 – 7.37 (m, 2H), 4.43 (t,  $J$  = 6.4 Hz, 2H), 4.09 (dt,  $J$  = 9.7, 6.6 Hz, 1H), 3.61 (dt,  $J$  = 9.7, 6.6 Hz, 1H), 3.14 (t,  $J$  = 6.4 Hz, 2H), 1.60 – 1.53 (m, 2H), 1.26 – 1.15 (m, 6H), 0.83 (t,  $J$  = 6.8 Hz, 3H).  **$^{13}C$  NMR** (100 MHz, Chloroform-*d*)  $\delta$  146.9, 145.0, 134.2, 133.1, 129.9, 128.9, 128.7, 123.7, 69.4, 67.6, 35.2, 31.1, 29.1, 25.2, 22.4, 13.9. **HRMS** (ESI-TOF): Anal Calcd. For.  $C_{20}H_{25}BrN_2O_6S_2+H^+$ : 535.0390, found: 525.0370. **IR** (neat,  $cm^{-1}$ ):  $\nu$  3088, 2955, 2931, 2870, 1720, 1342, 1314, 1156, 1006, 889, 804, 731.

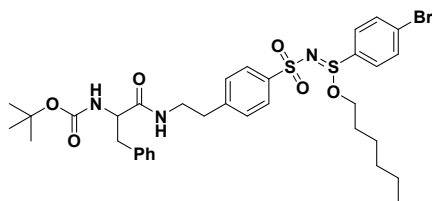

#### 4bc

petroleum ether / ethyl acetate = 15:1 – 2:1, a yellow solid, 55% yield (80.7 mg). mp: 55 – 57 °C. **<sup>1</sup>H NMR** (400 MHz, Chloroform-*d*) δ 7.88 – 7.86 (m, 2H), 7.73 – 7.68 (m, 4H), 7.33 – 7.27 (m, 3H), 7.22 – 7.18 (m, 4H), 6.07 (t, *J* = 4.8 Hz, 1H), 5.13 – 5.11 (m, 1H), 4.32 – 4.27 (m, 1H), 3.99 (dt, *J* = 9.6, 6.6 Hz, 1H), 3.56 – 3.37 (m, 3H), 3.05 (d, *J* = 7.1 Hz, 2H), 2.81 – 2.68 (m, 2H), 1.53 – 1.47 (m, 2H), 1.42 (s, 9H), 1.29 – 1.18 (m, 6H), 0.88 (t, *J* = 7.1 Hz, 3H). **<sup>13</sup>C NMR** (100 MHz, Chloroform-*d*) δ 171.2, 155.3, 143.2, 141.4, 136.6, 134.7, 132.8, 129.2, 129.0, 128.8, 128.6, 128.3, 126.9, 126.6, 80.1, 66.1, 55.9, 40.2, 38.6, 35.4, 31.1, 28.8, 28.2, 25.1, 22.3, 13.8. **HRMS** (ESI-TOF): Anal Calcd. For. C<sub>34</sub>H<sub>44</sub>BrN<sub>3</sub>O<sub>6</sub>S<sub>2</sub>+Na<sup>+</sup>: 758.1727, found: 758.1725. **IR** (neat, cm<sup>-1</sup>): ν 2957, 2928, 1655, 1293, 1148, 1025, 1001, 732, 697.

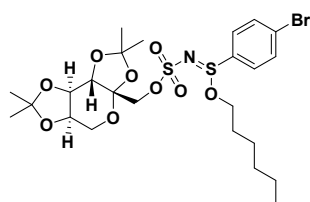

#### 4bd

petroleum ether / ethyl acetate = 15:1 – 6:1, a viscous waxy oil, 77% yield (96.3 mg). **<sup>1</sup>H NMR** (400 MHz, Chloroform-*d*) δ 7.75 – 7.70 (m, 4H), 4.59 – 4.54 (m, 1H), 4.38 – 4.37 (m, 1H), 4.25 – 4.14 (m, 4H), 3.88 – 3.84 (m, 1H), 3.74 – 3.65 (m, 2H), 1.66 – 1.59 (m, 2H), 1.48 (d, *J* = 13.8 Hz, 3H), 1.40 – 1.37 (m, 6H), 1.30 – 1.19 (m, 9H), 0.84 (t, *J* = 6.8 Hz, 3H). **<sup>13</sup>C NMR** (100 MHz, Chloroform-*d*) δ 134.4, 134.3, 132.9, 128.9, 128.8, 128.64, 128.60, 109.01, 108.99, 100.98, 100.96, 70.61, 70.60, 69.95, 69.92, 69.5, 69.4, 67.6, 67.4, 61.2, 31.1, 29.1, 26.5, 26.4, 25.7, 25.2, 25.1, 24.0, 23.9, 22.3, 13.8. **HRMS** (ESI-TOF): Anal Calcd. For. C<sub>24</sub>H<sub>36</sub>BrNO<sub>9</sub>S<sub>2</sub>+H<sup>+</sup>: 626.1088, found: 626.1082. **IR** (neat, cm<sup>-1</sup>): ν 3089, 2988, 2934, 2872, 1348, 1159, 1068, 1050, 997, 886, 830, 817.



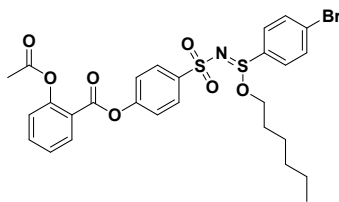

#### 4be

petroleum ether / ethyl acetate = 15:1 – 5:1, a yellow solid, 63% yield (78.3 mg). mp: 48 – 50 °C. **<sup>1</sup>H NMR** (400 MHz, Chloroform-*d*) δ 8.19 – 8.17 (m, 1H), 8.03 – 8.00 (m, 2H), 7.70 – 7.62 (m, 5H), 7.40 – 7.35 (m, 1H), 7.31 – 7.27 (m, 2H), 7.18 – 7.15 (m, 1H), 3.96 (dt, *J* = 9.6, 6.6 Hz, 1H), 3.50 (dt, *J* = 9.6, 6.7 Hz, 1H), 2.28 (s, 3H), 1.52 – 1.45 (m, 2H), 1.25 – 1.15 (m, 6H), 0.83 (t, *J* = 7.0 Hz, 3H). **<sup>13</sup>C NMR** (100 MHz, Chloroform-*d*) δ 169.5, 162.1, 153.1, 151.2, 140.8, 134.9, 134.5, 132.8, 132.0, 128.8, 128.4, 128.0, 126.2, 124.0, 122.1, 121.8, 66.2, 31.0, 28.8, 25.1, 22.3, 20.9, 13.8. **HRMS** (ESI-TOF): Anal Calcd. For. C<sub>27</sub>H<sub>28</sub>BrNO<sub>7</sub>S<sub>2</sub>+Na<sup>+</sup>: 646.0363, found: 646.0363. **IR** (neat, cm<sup>-1</sup>): ν 3735, 3619, 2924, 1730, 1195, 1152, 1017, 921.

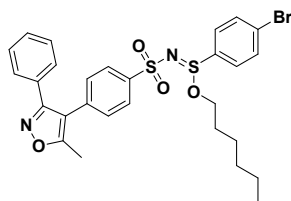

#### 4bf

petroleum ether / ethyl acetate = 15:1 – 5:1, a viscous waxy oil, 85% yield (102.0 mg). **<sup>1</sup>H NMR** (400 MHz, Chloroform-*d*) δ 7.94 – 7.91 (m, 2H), 7.70 – 7.65 (m, 4H), 7.36 – 7.34 (m, 3H), 7.30 – 7.26 (m, 4H), 3.98 (dt, *J* = 9.6, 6.5 Hz, 1H), 3.53 (dt, *J* = 9.7, 6.7 Hz, 1H), 2.44 (s, 3H), 1.51 – 1.44 (m, 2H), 1.23 – 1.13 (m, 6H), 0.80 (t, *J* = 6.8 Hz, 3H). **<sup>13</sup>C NMR** (100 MHz, Chloroform-*d*) δ 167.0, 160.9, 142.2, 134.5, 134.3, 132.8, 129.9, 129.5, 128.7, 128.5, 128.4, 128.3, 126.6, 114.5, 66.2, 31.0, 28.8, 25.1, 22.2, 13.8, 11.6. **HRMS** (ESI-TOF): Anal Calcd. For. C<sub>28</sub>H<sub>29</sub>BrN<sub>2</sub>O<sub>4</sub>S<sub>2</sub>+Na<sup>+</sup>: 625.0624, found: 625.0630. **IR** (neat, cm<sup>-1</sup>): ν 2955, 2928, 2859, 1339, 1149, 1026, 1001, 901, 696, 611.

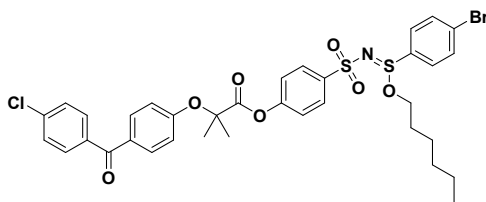

#### 4bg

petroleum ether / ethyl acetate = 15:1 – 6:1, a viscous waxy oil, 71% yield (107.8 mg). <sup>1</sup>H NMR (400 MHz, Chloroform-*d*) δ 7.97 – 7.95 (m, 2H), 7.77 – 7.75 (m, 2H), 7.69 – 7.62 (m, 6H), 7.43 – 7.41 (d, *J* = 8.2 Hz, 2H), 7.11 – 7.09 (m, 2H), 6.97 – 6.95 (m, 2H), 3.92 (dt, *J* = 9.6, 6.6 Hz, 1H), 3.46 (dt, *J* = 9.6, 6.7 Hz, 1H), 1.80 (s, 6H), 1.47 – 1.40 (m, 2H), 1.23 – 1.11 (m, 6H), 0.80 (t, *J* = 7.0 Hz, 3H). <sup>13</sup>C NMR (100 MHz, Chloroform-*d*) δ 194.0, 171.7, 159.2, 152.8, 141.1, 138.4, 136.1, 134.4, 132.8, 132.0, 131.0, 130.7, 128.7, 128.5, 128.4, 128.0, 121.6, 117.2, 79.3, 66.1, 31.0, 28.8, 25.3, 25.0, 22.2, 13.8. HRMS (ESI-TOF): Anal Calcd. For. C<sub>35</sub>H<sub>35</sub>BrClNO<sub>7</sub>S<sub>2</sub>+Na<sup>+</sup>: 782.0620, found: 782.0613. IR (neat, cm<sup>-1</sup>): ν 3086, 2955, 2929, 2870, 1760, 1597, 1148, 1088, 1000, 927, 762.

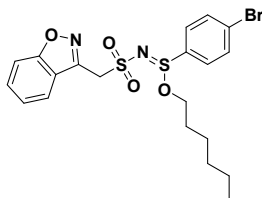

#### 4bh

petroleum ether / ethyl acetate = 15:1 – 5:1, a yellow solid, 72% yield (71.7 mg). mp: 135 – 137 °C. <sup>1</sup>H NMR (400 MHz, Chloroform-*d*) δ 7.96 – 7.94 (m, 1H), 7.68 – 7.65 (m, 2H), 7.59 – 7.50 (m, 4H), 7.35 – 7.31 (m, 1H), 4.80 (dd, *J* = 3.2, 5.8 Hz, 2H), 4.08 (dt, *J* = 9.6, 6.5 Hz, 1H), 3.54 (dt, *J* = 9.6, 6.7 Hz, 1H), 1.59 – 1.52 (m, 2H), 1.26 – 1.17 (m, 6H), 0.83 (t, *J* = 6.9 Hz, 3H). <sup>13</sup>C NMR (100 MHz, Chloroform-*d*) δ 163.5, 150.4, 134.3, 132.7, 130.2, 128.7, 128.4, 124.1, 122.8, 120.9, 109.6, 67.0, 51.6, 31.1, 28.9, 25.0, 22.3, 13.8. HRMS (ESI-TOF): Anal Calcd. For. C<sub>20</sub>H<sub>23</sub>BrN<sub>2</sub>O<sub>4</sub>S<sub>2</sub>+Na<sup>+</sup>: 521.0175, found: 521.0176. IR (neat, cm<sup>-1</sup>): ν 3328, 3265, 3085, 2989, 2931, 1516, 1384, 1329, 1143, 1036, 1006, 915, 818, 737.

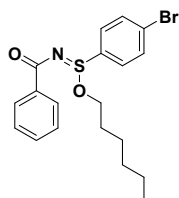

#### 4bi

petroleum ether / ethyl acetate = 20:1 – 10:1, a yellow solid, 68% yield (55.4 mg). mp: 38 – 40 °C. **<sup>1</sup>H NMR** (400 MHz, Chloroform-*d*) δ 8.28 – 8.25 (m, 2H), 7.93 – 7.89 (m, 2H), 7.75 – 7.72 (m, 2H), 7.54 – 7.49 (m, 1H), 7.46 – 7.41 (m, 2H), 4.26 (dt, *J* = 9.9, 6.6 Hz, 1H), 3.92 (dt, *J* = 9.8, 6.6 Hz, 1H), 1.68 – 1.61 (m, 2H), 1.31 – 1.20 (m, 6H), 0.83 (t, *J* = 6.8 Hz, 3H). **<sup>13</sup>C NMR** (100 MHz, Chloroform-*d*) δ 178.3, 135.9, 135.6, 132.6, 131.9, 129.4, 129.3, 128.0, 127.7, 68.5, 31.2, 29.6, 25.2, 22.4, 13.9. **HRMS** (ESI-TOF): Anal Calcd. For. C<sub>19</sub>H<sub>22</sub>BrNO<sub>2</sub>S+Na<sup>+</sup>: 430.0447, found: 430.0441. **IR** (neat, cm<sup>-1</sup>): ν 3050, 3010, 2954, 2931, 2858, 1600, 1566, 1314, 1285, 1275, 887, 705.

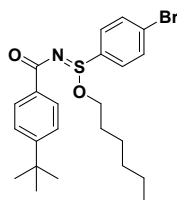

#### 4bj

petroleum ether / ethyl acetate = 20:1 – 12:1, a yellow oil, 70% yield (64.8 mg). **<sup>1</sup>H NMR** (400 MHz, Chloroform-*d*) δ 8.21 – 8.18 (m, 2H), 7.92 – 7.89 (m, 2H), 7.75 – 7.71 (m, 2H), 7.48 – 7.44 (m, 2H), 4.25 (dt, *J* = 9.8, 6.6 Hz, 1H), 3.90 (dt, *J* = 9.9, 6.6 Hz, 1H), 1.67 – 1.60 (m, 2H), 1.35 (s, 9H), 1.31 – 1.20 (m, 6H), 0.83 (t, *J* = 6.8 Hz, 3H). **<sup>13</sup>C NMR** (100 MHz, Chloroform-*d*) δ 178.3, 155.4, 136.1, 132.9, 132.6, 129.31, 129.29, 127.6, 125.0, 68.3, 34.9, 31.21, 31.18, 29.6, 25.2, 22.4, 13.9. **HRMS** (ESI-TOF): Anal Calcd. For. C<sub>23</sub>H<sub>30</sub>BrNO<sub>2</sub>S+H<sup>+</sup>: 464.1254, found: 464.1256. **IR** (neat, cm<sup>-1</sup>): ν 3085, 2956, 2929, 2868, 1607, 1312, 1281, 1184, 1125, 1009, 895, 776, 735, 709.

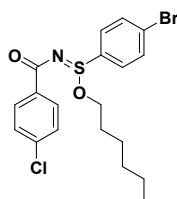

#### 4bk

petroleum ether / ethyl acetate = 20:1 – 10:1, a colorless oil, 70% yield (61.7 mg). **<sup>1</sup>H NMR** (400 MHz, Chloroform-*d*) δ 8.20 – 8.17 (m, 2H), 7.90 – 7.87 (m, 2H), 7.76 – 7.72 (m, 2H), 7.41 – 7.38 (m, 2H), 4.25 (dt, *J* = 9.8, 6.6 Hz, 1H), 3.92 (dt, *J* = 9.8, 6.6 Hz, 1H), 1.67 – 1.60 (m, 2H), 1.30 – 1.20 (m, 6H), 0.83 (t, *J* = 6.8 Hz, 3H). **<sup>13</sup>C NMR** (100 MHz, Chloroform-*d*) δ 177.3, 138.1, 135.7, 134.1, 132.7, 130.8, 129.2,

128.2, 127.8, 68.8, 31.2, 29.6, 25.2, 22.4, 13.9. **HRMS** (ESI-TOF): Anal Calcd. For.  $C_{19}H_{21}BrClNO_2S+Na^+$ : 464.0058, found: 464.0067. **IR** (neat,  $cm^{-1}$ ):  $\nu$  3084, 2955, 2927, 2858, 1609, 1271, 1009, 889, 761, 735.

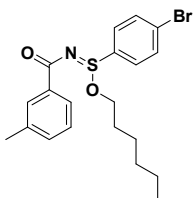

#### 4bl

petroleum ether / ethyl acetate = 20:1 – 12:1, a yellow oil, 46% yield (38.7 mg).  **$^1H$  NMR** (400 MHz, Chloroform-*d*)  $\delta$  8.08 – 8.05 (m, 2H), 7.92 – 7.88 (m, 2H), 7.76 – 7.72 (m, 2H), 7.33 – 7.32 (m, 2H), 4.26 (dt,  $J = 9.8, 6.6$  Hz, 1H), 3.93 (dt,  $J = 9.9, 6.6$  Hz, 1H), 2.42 (s, 3H), 1.68 – 1.61 (m, 2H), 1.32 – 1.20 (m, 6H), 0.83 (t,  $J = 6.7$  Hz, 3H).  **$^{13}C$  NMR** (100 MHz, Chloroform-*d*)  $\delta$  178.6, 137.6, 136.0, 135.5, 132.7, 132.6, 129.9, 129.3, 127.9, 127.6, 126.6, 68.6, 31.2, 29.6, 25.2, 22.4, 21.3, 13.9. **HRMS** (ESI-TOF): Anal Calcd. For.  $C_{20}H_{24}BrNO_2S+H^+$ : 424.0764, found: 424.0763. **IR** (neat,  $cm^{-1}$ ):  $\nu$  3083, 2954, 2927, 2858, 1579, 1276, 1200, 1066, 874, 746, 731.

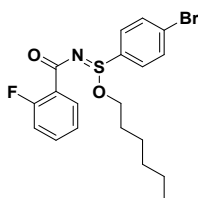

#### 4bm

petroleum ether / ethyl acetate = 20:1 – 10:1, a yellow oil, 74% yield (62.9 mg).  **$^1H$  NMR** (400 MHz, Chloroform-*d*)  $\delta$  8.08 – 8.04 (m, 1H), 7.92 – 7.87 (m, 2H), 7.73 – 7.69 (m, 2H), 7.46 – 7.41 (m, 1H), 7.19 – 7.08 (m, 2H), 4.27 (dt,  $J = 9.9, 6.6$  Hz, 1H), 3.92 (dt,  $J = 9.9, 6.6$  Hz, 1H), 1.68 – 1.61 (dt,  $J = 14.4, 6.7$  Hz, 2H), 1.33 – 1.19 (m, 6H), 0.83 (t,  $J = 6.8$  Hz, 3H).  **$^{13}C$  NMR** (100 MHz, Chloroform-*d*)  $\delta$  176.4 (d,  $J = 4.2$  Hz), 161.8 (d,  $J = 256.9$  Hz), 135.5, 132.9 (d,  $J = 8.8$  Hz), 132.6, 132.0 (d,  $J = 1.5$  Hz), 129.4, 127.7, 124.4 (d,  $J = 10.0$  Hz), 123.6 (d,  $J = 3.8$  Hz), 116.6 (d,  $J = 23.1$  Hz), 68.7, 31.2, 29.6, 25.1, 22.4, 13.9.  **$^{19}F$  NMR** (376 MHz, Chloroform-*d*)  $\delta$  -109.72 (d,  $J = 2.1$  Hz, 1F). **HRMS** (ESI-TOF): Anal Calcd.

For.  $C_{19}H_{21}BrFNO_2S+H^+$ : 428.0513, found: 428.0512. **IR** (neat,  $cm^{-1}$ ):  $\nu$  3083, 2955, 2928, 2858, 1608, 1302, 1129, 1066, 756, 731, 696.

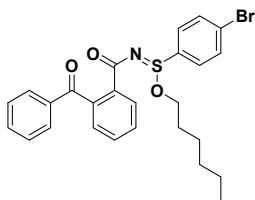

#### 4bn

petroleum ether / ethyl acetate = 15:1 – 8:1, a viscous waxy oil, 56% yield (57.2 mg).  **$^1H$  NMR** (400 MHz, Chloroform-*d*)  $\delta$  8.22 – 8.20 (m, 1H), 7.71 – 7.68 (m, 2H), 7.64 – 7.60 (m, 2H), 7.58 – 7.53 (m, 4H), 7.46 – 7.42 (m, 1H), 7.37 – 7.35 (m, 1H), 7.33 – 7.29 (m, 2H), 3.55 (dt,  $J = 9.7, 6.5$  Hz, 1H), 3.28 (dt,  $J = 9.7, 6.6$  Hz, 1H), 1.38 – 1.31 (m, 2H), 1.23 – 1.17 (m, 2H), 1.14 – 1.08 (m, 4H), 0.82 (t,  $J = 7.2$  Hz, 3H).  **$^{13}C$  NMR** (100 MHz, Chloroform-*d*)  $\delta$  197.5, 177.3, 141.1, 137.9, 134.9, 134.6, 132.5, 132.4, 131.3, 129.7, 129.4, 129.3, 129.2, 128.2, 127.8, 127.3, 67.3, 31.1, 29.2, 25.0, 22.3, 13.9. **HRMS** (ESI-TOF): Anal Calcd. For.  $C_{26}H_{26}BrNO_3S+H^+$ : 514.0870, found: 514.0871. **IR** (neat,  $cm^{-1}$ ):  $\nu$  3084, 3062, 2954, 2925, 2856, 1669, 1280, 1066, 862, 699.

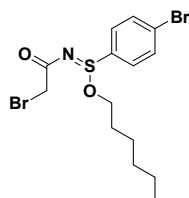

#### 4bo

petroleum ether / ethyl acetate = 20:1 – 10:1, a colorless oil, 45% yield (38.1 mg).  **$^1H$  NMR** (400 MHz, Chloroform-*d*)  $\delta$  7.81 – 7.77 (m, 2H), 7.73 – 7.68 (m, 2H), 4.20 (dt,  $J = 9.9, 6.6$  Hz, 1H), 4.04 (dd,  $J = 18.9, 12.0$  Hz, 2H), 3.87 (dt,  $J = 9.8, 6.6$  Hz, 1H), 1.66 – 1.59 (m, 2H), 1.31 – 1.21 (m, 6H), 0.85 (t,  $J = 6.9$  Hz, 3H).  **$^{13}C$  NMR** (100 MHz, Chloroform-*d*)  $\delta$  179.4, 134.9, 132.7, 129.1, 128.1, 69.3, 31.8, 31.2, 29.5, 25.1, 22.4, 13.9. **HRMS** (ESI-TOF): Anal Calcd. For.  $C_{14}H_{19}Br_2NO_2S+Na^+$ : 447.9375, found: 447.9370. **IR** (neat,  $cm^{-1}$ ):  $\nu$  3084, 2954, 2928, 2858, 1624, 1470, 1284, 1163, 1066, 818, 733.

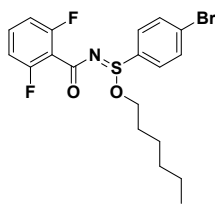

#### 4bp

petroleum ether / ethyl acetate = 20:1 – 10:1, a yellow oil, 64% yield (56.7 mg). **<sup>1</sup>H NMR** (400 MHz, Chloroform-*d*)  $\delta$  7.85 – 7.81 (m, 2H), 7.72 – 7.68 (m, 2H), 7.34 – 7.26 (m, 1H), 6.95 – 6.89 (m, 2H), 4.27 (dt,  $J$  = 9.8, 6.6 Hz, 1H), 3.88 (dt,  $J$  = 9.8, 6.6 Hz, 1H), 1.71 – 1.64 (m, 2H), 1.34 – 1.22 (m, 6H), 0.85 (t,  $J$  = 6.8 Hz, 3H). **<sup>13</sup>C NMR** (100 MHz, Chloroform-*d*)  $\delta$  173.4, 161.4 (d,  $J$  = 7.3 Hz), 158.9 (d,  $J$  = 7.3 Hz), 134.8, 132.7, 130.6 (t,  $J$  = 10.2 Hz), 129.3, 128.0, 116.9 (t,  $J$  = 20.2 Hz), 111.9 – 111.5 (m), 68.6, 31.2, 29.5, 25.2, 22.4, 13.9. **<sup>19</sup>F NMR** (376 MHz, Chloroform-*d*)  $\delta$  -112.07 (s, 2F). **HRMS** (ESI-TOF): Anal Calcd. For. C<sub>19</sub>H<sub>20</sub>BrF<sub>2</sub>NO<sub>2</sub>S+H<sup>+</sup>: 444.0439, found: 444.0439. **IR** (neat, cm<sup>-1</sup>):  $\nu$  3087, 2955, 2929, 2859, 1616, 1464, 1287, 1120, 1005, 853, 729.

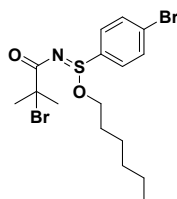

#### 4bq

petroleum ether / ethyl acetate = 30:1 – 20:1, a yellow oil, 42% yield (37.9 mg). **<sup>1</sup>H NMR** (400 MHz, Chloroform-*d*)  $\delta$  7.83 – 7.80 (m, 2H), 7.72 – 7.69 (m, 2H), 4.20 (dt,  $J$  = 9.9, 6.6 Hz, 1H), 3.81 (dt,  $J$  = 9.8, 6.6 Hz, 1H), 2.03 (s, 6H), 1.66 – 1.59 (m, 2H), 1.30 – 1.20 (m, 6H), 0.85 (t,  $J$  = 6.9 Hz, 3H). **<sup>13</sup>C NMR** (100 MHz, Chloroform-*d*)  $\delta$  184.4, 135.4, 132.7, 129.3, 127.8, 68.4, 61.9, 31.7, 31.7, 31.2, 29.5, 25.2, 22.4, 13.9. **HRMS** (ESI-TOF): Anal Calcd. For. C<sub>16</sub>H<sub>23</sub>Br<sub>2</sub>NO<sub>2</sub>S+H<sup>+</sup>: 453.9869, found: 453.9869. **IR** (neat, cm<sup>-1</sup>):  $\nu$  3083, 2956, 2927, 2858, 1620, 1283, 1163, 879, 731.

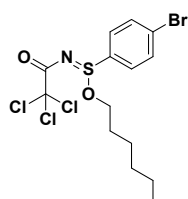

#### 4br

petroleum ether / ethyl acetate = 20:1 – 15:1, a colorless oil, 71% yield (63.5 mg). **<sup>1</sup>H NMR** (400 MHz, Chloroform-*d*) δ 7.85 – 7.83 (m, 2H), 7.76 – 7.73 (m, 2H), 4.23 (dt, *J* = 9.8, 6.6 Hz, 1H), 3.84 (dt, *J* = 9.8, 6.5 Hz, 1H), 1.68 – 1.61 (m, 2H), 1.31 – 1.21 (m, 6H), 0.85 (t, *J* = 6.8 Hz, 3H). **<sup>13</sup>C NMR** (100 MHz, Chloroform-*d*) δ 173.3, 134.0, 133.0, 129.3, 128.7, 69.2, 31.1, 29.4, 25.1, 22.4, 13.9. **HRMS** (ESI-TOF): Anal Calcd. For. C<sub>14</sub>H<sub>17</sub>BrCl<sub>3</sub>NO<sub>2</sub>S+Na<sup>+</sup>: 471.9101, found: 471.9101. **IR** (neat, cm<sup>-1</sup>): ν 3087, 2955, 2929, 2859, 1656, 1241, 1067, 873, 811, 677.

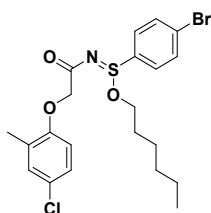

#### 4bs

petroleum ether / ethyl acetate = 15:1 – 8:1, a colorless oil, 70% yield (67.9 mg). **<sup>1</sup>H NMR** (400 MHz, Chloroform-*d*) δ 7.70 – 7.65 (m, 4H), 7.12 – 7.11 (m, 1H), 7.05 – 7.02 (m, 1H), 6.69 – 6.67 (m, 1H), 4.76 (dd, *J* = 16.0, 17.5 Hz, 2H), 4.14 (dt, *J* = 9.8, 6.7 Hz, 1H), 3.85 (dt, *J* = 9.8, 6.6 Hz, 1H), 2.29 (s, 3H), 1.64 – 1.57 (m, 2H), 1.30 – 1.20 (m, 6H), 0.85 (t, *J* = 6.8 Hz, 3H). **<sup>13</sup>C NMR** (100 MHz, Chloroform-*d*) δ 181.2, 155.2, 135.1, 132.6, 130.5, 129.0, 128.9, 128.0, 126.1, 125.3, 112.3, 69.2, 69.1, 31.2, 29.5, 25.1, 22.4, 16.2, 13.9. **HRMS** (ESI-TOF): Anal Calcd. For. C<sub>21</sub>H<sub>25</sub>BrClNO<sub>3</sub>S+H<sup>+</sup>: 486.0500, found: 486.0503. **IR** (neat, cm<sup>-1</sup>): ν 3084, 2955, 2923, 2854, 1647, 1489, 1208, 1183, 1135, 1065, 868, 802, 733.

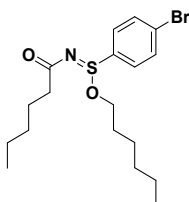

#### 4bt

petroleum ether / ethyl acetate = 20:1 – 10:1, a yellow oil, 61% yield (48.9 mg). **<sup>1</sup>H NMR** (400 MHz, Chloroform-*d*) δ 7.80 – 7.75 (m, 2H), 7.69 – 7.65 (m, 2H), 4.16 (dt, *J* = 9.9, 6.6 Hz, 1H), 3.86 (dt, *J* = 9.9, 6.6 Hz, 1H), 2.49 – 2.46 (m, 2H), 1.73 – 1.66 (m, 2H), 1.65 – 1.58 (m, 2H), 1.35 – 1.31 (m, 4H), 1.30 – 1.21 (m, 6H), 0.90 – 0.82 (m, 6H). **<sup>13</sup>C NMR** (100 MHz, Chloroform-*d*) δ 187.5, 135.9, 132.5, 129.1, 127.4, 68.7, 38.8, 31.6, 31.2, 29.6, 25.8, 25.2, 22.45, 22.39, 14.0, 13.9. **HRMS** (ESI-TOF): Anal

Calcd. For.  $C_{18}H_{28}BrNO_2S+Na^+$ : 426.0896, found: 426.0901. **IR** (neat,  $cm^{-1}$ ):  $\nu$  3084, 2955, 2927, 2858, 1621, 1171, 1066, 869, 731.

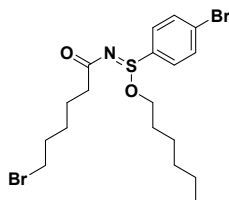

#### 4bu

petroleum ether / ethyl acetate = 15:1 – 6:1, a yellow oil, 41% yield (39.3 mg).  **$^1H$  NMR** (400 MHz, Chloroform-*d*)  $\delta$  7.79 – 7.76 (m, 2H), 7.70 – 7.67 (m, 2H), 4.17 (dt,  $J = 9.9, 6.6$  Hz, 1H), 3.87 (dt,  $J = 9.9, 6.6$  Hz, 1H), 3.41 (t,  $J = 6.8$  Hz, 2H), 2.53 – 2.49 (m, 2H), 1.93 – 1.86 (m, 2H), 1.77 – 1.69 (m, 2H), 1.66 – 1.59 (m, 2H), 1.55 – 1.47 (m, 2H), 1.30 – 1.21 (m, 6H), 0.85 (t,  $J = 6.9$  Hz, 3H).  **$^{13}C$  NMR** (100 MHz, Chloroform-*d*)  $\delta$  186.9, 135.8, 132.6, 129.1, 127.6, 68.8, 38.4, 33.8, 32.6, 31.2, 29.7, 27.9, 25.2, 25.1, 22.4, 13.9. **HRMS** (ESI-TOF): Anal Calcd. For.  $C_{18}H_{27}Br_2NO_2S+Na^+$ : 502.0022, found: 502.0021. **IR** (neat,  $cm^{-1}$ ):  $\nu$  3083, 2954, 2929, 2958, 1620, 1470, 1254, 1066, 1009, 865, 818, 731.

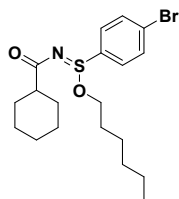

#### 4bv

petroleum ether / ethyl acetate = 30:1 – 20:1, a colorless oil, 48% yield (39.7 mg).  **$^1H$  NMR** (400 MHz, Chloroform-*d*)  $\delta$  7.78 – 7.75 (m, 2H), 7.68 – 7.65 (m, 2H), 4.15 (dt,  $J = 9.9, 6.6$  Hz, 1H), 3.84 (dt,  $J = 9.9, 6.6$  Hz, 1H), 2.45 (tt,  $J = 11.4, 3.6$  Hz, 1H), 1.99 – 1.96 (m, 2H), 1.79 – 1.73 (m, 2H), 1.66 – 1.57 (m, 3H), 1.55 – 1.44 (m, 2H), 1.35 – 1.19 (m, 9H), 0.84 (t,  $J = 6.8$  Hz, 3H).  **$^{13}C$  NMR** (100 MHz, Chloroform-*d*)  $\delta$  190.0, 136.1, 132.5, 129.2, 127.4, 68.4, 47.1, 31.2, 30.1, 30.0, 29.6, 26.0, 25.9, 25.8, 25.2, 22.4, 13.9. **HRMS** (ESI-TOF): Anal Calcd. For.  $C_{19}H_{28}BrNO_2S+H^+$ : 414.1097, found: 414.1019. **IR** (neat,  $cm^{-1}$ ):  $\nu$  3083, 2926, 2853, 1617, 1246, 1168, 1008, 865, 730.



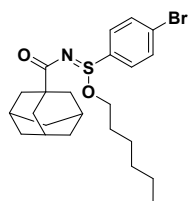

#### 4bw

petroleum ether / ethyl acetate = 20:1 – 10:1, a colorless solid, 42% yield (39.1 mg). mp: 70 – 72 °C. **<sup>1</sup>H NMR** (400 MHz, Chloroform-*d*) δ 7.81 – 7.77 (m, 2H), 7.70 – 7.66 (m, 2H), 4.15 (dt, *J* = 9.9, 6.6 Hz, 1H), 3.82 (dt, *J* = 10.0, 6.6 Hz, 1H), 2.03 – 2.02 (m, 3H), 1.99 – 1.98 (m, 6H), 1.73 – 1.72 (m, 6H), 1.63 – 1.56 (m, 2H), 1.29 – 1.20 (m, 6H), 0.85 (t, *J* = 6.9 Hz, 3H). **<sup>13</sup>C NMR** (100 MHz, Chloroform-*d*) δ 191.9, 136.4, 132.5, 129.3, 127.3, 68.1, 42.9, 39.8, 36.7, 31.2, 29.7, 28.4, 25.2, 22.4, 13.9. **HRMS** (ESI-TOF): Anal Calcd. For. C<sub>23</sub>H<sub>32</sub>BrNO<sub>2</sub>S+H<sup>+</sup>: 466.1410, found: 466.1411. **IR** (neat, cm<sup>-1</sup>): ν 2955, 2918, 2900, 2850, 1616, 1234, 1079, 866, 822, 694.

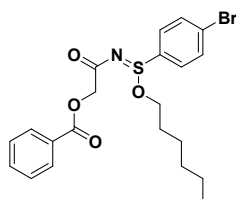

#### 4bx

petroleum ether / ethyl acetate = 15:1 – 8:1, a yellow oil, 70% yield (65.1 mg). **<sup>1</sup>H NMR** (400 MHz, Chloroform-*d*) δ 8.14 – 8.12 (m, 2H), 7.74 – 7.70 (m, 2H), 7.65 – 7.60 (m, 2H), 7.59 – 7.54 (m, 1H), 7.46 – 7.42 (m, 2H), 5.01 (dd, *J* = 15.6, 31.8 Hz, 2H), 4.18 (dt, *J* = 9.9, 6.6 Hz, 1H), 3.84 (dt, *J* = 9.9, 6.6 Hz, 1H), 1.65 – 1.58 (m, 2H), 1.29 – 1.19 (m, 6H), 0.84 (t, *J* = 6.8 Hz, 3H). **<sup>13</sup>C NMR** (100 MHz, Chloroform-*d*) δ 179.9, 166.2, 135.1, 133.0, 132.6, 129.9, 129.8, 129.1, 128.3, 127.9, 69.1, 64.8, 31.1, 29.5, 25.1, 22.4, 13.9. **HRMS** (ESI-TOF): Anal Calcd. For. C<sub>21</sub>H<sub>24</sub>BrNO<sub>4</sub>S+H<sup>+</sup>: 466.0683, found: 466.0685. **IR** (neat, cm<sup>-1</sup>): ν 3086, 2954, 2929, 2858, 1723, 1647, 1210, 1112, 1067, 866, 707.

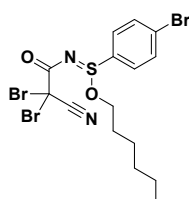

#### 4by

petroleum ether / ethyl acetate = 20:1 – 12:1, a colorless oil, 74% yield (77.8 mg).  $^1\text{H NMR}$  (400 MHz, Chloroform-*d*)  $\delta$  7.87 – 7.83 (m, 2H), 7.79 – 7.76 (m, 2H), 4.23 (dt,  $J = 9.7, 6.6$  Hz, 1H), 3.82 (dt,  $J = 9.7, 6.5$  Hz, 1H), 1.68 – 1.63 (m, 2H), 1.32 – 1.22 (m, 6H), 0.86 (t,  $J = 6.8$  Hz, 3H).  $^{13}\text{C NMR}$  (100 MHz, Chloroform-*d*)  $\delta$  170.6, 133.20, 133.18, 129.3, 129.2, 115.5, 69.4, 31.2, 31.1, 29.4, 25.1, 22.4, 13.9. **HRMS** (ESI-TOF): Anal Calcd. For.  $\text{C}_{15}\text{H}_{17}\text{Br}_3\text{N}_2\text{O}_2\text{S}+\text{Na}^+$ : 552.8413, found: 552.8419. **IR** (neat,  $\text{cm}^{-1}$ ):  $\nu$  3345, 2955, 2928, 2858, 1716, 1652, 1362, 1173, 1068, 1009, 820, 737.

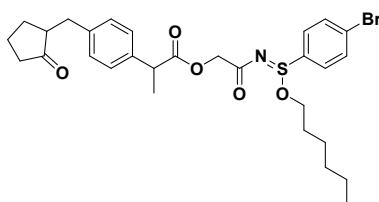

#### 4bz

petroleum ether / ethyl acetate = 15:1 – 3:1, a viscous waxy oil, 41% yield (48.3 mg).  $^1\text{H NMR}$  (400 MHz, Chloroform-*d*)  $\delta$  7.73 – 7.64 (m, 4H), 7.28 – 7.25 (m, 2H), 7.11 – 7.09 (m, 2H), 4.87 – 4.62 (m, 2H), 4.13 (dq,  $J = 9.8, 6.7$  Hz, 1H), 3.87 – 3.73 (m, 2H), 3.11 (dd,  $J = 13.9, 4.0$  Hz, 1H), 2.51 – 2.45 (m, 1H), 2.36 – 2.28 (m, 2H), 2.14 – 2.03 (m, 2H), 1.98 – 1.90 (m, 1H), 1.75 – 1.67 (m, 1H), 1.62 – 1.48 (m, 6H), 1.30 – 1.19 (m, 6H), 0.85 (t,  $J = 6.7$  Hz, 3H).  $^{13}\text{C NMR}$  (100 MHz, Chloroform-*d*)  $\delta$  179.79, 179.78, 174.13, 174.10, 138.7, 138.2, 135.1, 135.0, 132.6, 129.1, 129.05, 129.98, 127.9, 127.7, 68.7, 68.50, 68.48, 64.68, 64.65, 50.9, 44.8, 38.1, 35.1, 31.1, 29.5, 29.4, 29.2, 25.1, 22.3, 20.4, 18.83, 18.81, 13.9. **HRMS** (ESI-TOF): Anal Calcd. For.  $\text{C}_{29}\text{H}_{36}\text{BrNO}_5\text{S}+\text{Na}^+$ : 614.1370, found: 614.1374. **IR** (neat,  $\text{cm}^{-1}$ ):  $\nu$  2956, 2928, 2857, 1736, 1648, 1151, 1066, 822, 733.

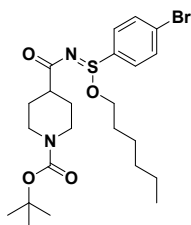

#### 4ca

petroleum ether / ethyl acetate = 15:1 – 3:1, a yellow oil, 52% yield (53.5 mg).  $^1\text{H NMR}$  (400 MHz, Chloroform-*d*)  $\delta$  7.77 – 7.74 (m, 2H), 7.69 – 7.66 (m, 2H), 4.16 – 4.06 (m, 3H), 3.82 (dt,  $J = 9.9, 6.6$  Hz, 1H), 2.82 (t,  $J = 12.3$  Hz, 2H), 2.56 (tt,  $J = 11.2, 3.8$  Hz, 1H), 1.96 – 1.92 (m, 2H), 1.74 – 1.65 (m, 2H),

1.63 – 1.56 (m, 2H), 1.44 (s, 9H), 1.28 – 1.19 (m, 6H), 0.83 (t,  $J = 6.8$  Hz, 3H).  $^{13}\text{C}$  NMR (100 MHz, Chloroform- $d$ )  $\delta$  188.1, 154.8, 135.7, 132.6, 129.1, 127.6, 79.3, 68.5, 44.9, 31.2, 29.6, 29.03, 28.98, 28.4, 25.2, 22.4, 13.9. **HRMS** (ESI-TOF): Anal Calcd. For.  $\text{C}_{23}\text{H}_{35}\text{BrN}_2\text{O}_4\text{S}+\text{H}^+$ : 515.1574, found: 515.1574. **IR** (neat,  $\text{cm}^{-1}$ ):  $\nu$  2954, 2926, 2856, 1687, 1365, 1160, 1034, 867, 731.

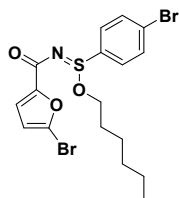

#### 4cb

petroleum ether / ethyl acetate = 15:1 – 8:1, a viscous waxy oil, 59% yield (56.0 mg).  $^1\text{H}$  NMR (400 MHz, Chloroform- $d$ )  $\delta$  7.86 – 7.83 (m, 2H), 7.73 – 7.70 (m, 2H), 7.16 (d,  $J = 3.4$  Hz, 1H), 6.42 (d,  $J = 3.5$  Hz, 1H), 4.23 (dt,  $J = 9.9, 6.7$  Hz, 1H), 3.91 (dt,  $J = 9.8, 6.6$  Hz, 1H), 1.67 – 1.60 (m, 2H), 1.30 – 1.18 (m, 6H), 0.82 (t,  $J = 6.8$  Hz, 3H).  $^{13}\text{C}$  NMR (100 MHz, Chloroform- $d$ )  $\delta$  168.4, 151.9, 135.3, 132.7, 129.2, 127.9, 126.1, 118.4, 113.7, 69.1, 31.1, 29.6, 25.1, 22.4, 13.9. **HRMS** (ESI-TOF): Anal Calcd. For.  $\text{C}_{17}\text{H}_{19}\text{Br}_2\text{NO}_3\text{S}+\text{Na}^+$ : 499.9325, found: 499.9326. **IR** (neat,  $\text{cm}^{-1}$ ):  $\nu$  3086, 2954, 2926, 2857, 1619, 1462, 1294, 1147, 1123, 1009, 876, 761, 730.

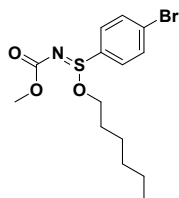

#### 4cc

petroleum ether / ethyl acetate = 15:1 – 7:1, a colorless oil, 59% yield (42.6 mg).  $^1\text{H}$  NMR (400 MHz, Chloroform- $d$ )  $\delta$  7.79 – 7.75 (m, 2H), 7.69 – 7.65 (m, 2H), 4.12 (dt,  $J = 9.8, 6.7$  Hz, 1H), 3.77 (s, 3H), 3.64 (dt,  $J = 9.9, 6.6$  Hz, 1H), 1.62 – 1.55 (m, 2H), 1.29 – 1.18 (m, 6H), 0.84 (t,  $J = 6.8$  Hz, 3H).  $^{13}\text{C}$  NMR (100 MHz, Chloroform- $d$ )  $\delta$  164.7, 135.2, 132.6, 129.1, 127.8, 66.5, 53.4, 31.1, 29.4, 25.1, 22.4, 13.9. **HRMS** (ESI-TOF): Anal Calcd. For.  $\text{C}_{14}\text{H}_{20}\text{BrNO}_3\text{S}+\text{H}^+$ : 362.0421, found: 362.0418. **IR** (neat,  $\text{cm}^{-1}$ ):  $\nu$  3085, 2952, 2929, 2858, 1658, 1241, 1066, 895, 736.

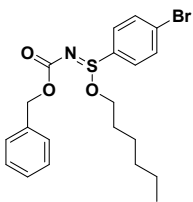

#### 4cd

petroleum ether / ethyl acetate = 15:1 – 7:1, a colorless oil, 78% yield (68.2 mg). **<sup>1</sup>H NMR** (400 MHz, Chloroform-*d*)  $\delta$  7.80 – 7.76 (m, 2H), 7.69 – 7.66 (m, 2H), 7.44 – 7.41 (m, 2H), 7.37 – 7.29 (m, 3H), 5.21 (dd,  $J$  = 12.8 Hz, 13.3 Hz, 2H), 4.13 (dt,  $J$  = 9.8, 6.6 Hz, 1H), 3.66 (dt,  $J$  = 9.8, 6.6 Hz, 1H), 1.62 – 1.55 (m, 2H), 1.28 – 1.18 (m, 6H), 0.85 (t,  $J$  = 6.9 Hz, 3H). **<sup>13</sup>C NMR** (100 MHz, Chloroform-*d*)  $\delta$  164.1, 136.6, 135.2, 132.6, 129.2, 128.4, 128.3, 128.0, 127.8, 68.1, 66.7, 31.2, 29.4, 25.2, 22.4, 13.9. **HRMS** (ESI-TOF): Anal Calcd. For. C<sub>20</sub>H<sub>24</sub>BrNO<sub>3</sub>S+H<sup>+</sup>: 440.0713, found: 440.0714. **IR** (neat, cm<sup>-1</sup>):  $\nu$  3088, 3032, 2954, 2929, 2858, 1655, 1229, 890, 733, 695.

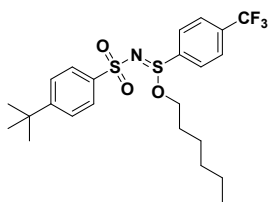

#### 5a

petroleum ether / ethyl acetate = 15:1 – 7:1, a colorless solid, 87% yield (85.1 mg). mp: 52 – 54 °C. **<sup>1</sup>H NMR** (400 MHz, Chloroform-*d*)  $\delta$  7.96 – 7.94 (m, 2H), 7.90 – 7.86 (m, 2H), 7.81 – 7.79 (m, 2H), 7.50 – 7.46 (m, 2H), 3.96 (dt,  $J$  = 9.6, 6.6 Hz, 1H), 3.48 (dt,  $J$  = 9.6, 6.7 Hz, 1H), 1.48 – 1.40 (m, 2H), 1.31 (s, 9H), 1.25 – 1.12 (m, 6H), 0.83 (t,  $J$  = 7.0 Hz, 3H). **<sup>13</sup>C NMR** (100 MHz, Chloroform-*d*)  $\delta$  155.7, 140.1, 139.8, 134.8 (q,  $J$  = 33.5 Hz), 128.1, 126.5 (q,  $J$  = 3.7 Hz), 126.2, 125.8, 123.0 (q,  $J$  = 273.3 Hz), 66.5, 35.0, 31.1, 31.0, 28.9, 25.1, 22.3, 13.8. **<sup>19</sup>F NMR** (376 MHz, Chloroform-*d*)  $\delta$  -63.12 (s, 3F). **HRMS** (ESI-TOF): Anal Calcd. For. C<sub>23</sub>H<sub>30</sub>F<sub>3</sub>NO<sub>3</sub>S<sub>2</sub>+H<sup>+</sup>: 490.1692, found: 490.1687. **IR** (neat, cm<sup>-1</sup>):  $\nu$  3101, 3060, 2966, 2934, 2871, 1321, 1298, 1151, 1130, 1108, 1028, 1006, 904, 840, 634.

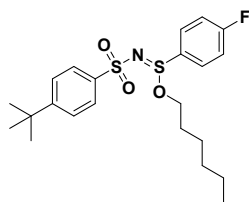

## 5b

petroleum ether / ethyl acetate = 15:1 – 7:1, a yellow oil, 75% yield (65.9 mg). **<sup>1</sup>H NMR** (400 MHz, Chloroform-*d*)  $\delta$  7.89 – 7.86 (m, 2H), 7.85 – 7.80 (m, 2H), 7.48 – 7.45 (m, 2H), 7.26 – 7.20 (m, 2H), 3.89 (dt,  $J = 9.6, 6.6$  Hz, 1H), 3.42 (dt,  $J = 9.6, 6.7$  Hz, 1H), 1.44 – 1.36 (m, 2H), 1.30 (s, 9H), 1.24 – 1.11 (m, 6H), 0.82 (t,  $J = 7.1$  Hz, 3H). **<sup>13</sup>C NMR** (100 MHz, Chloroform-*d*)  $\delta$  165.4 (d,  $J = 256.0$  Hz), 155.5, 140.3, 131.3 (d,  $J = 3.2$  Hz), 130.0 (d,  $J = 9.4$  Hz), 126.1, 125.7, 116.9 (d,  $J = 22.8$  Hz), 65.6, 35.0, 31.1, 31.0, 28.8, 25.1, 22.3, 13.8. **<sup>19</sup>F NMR** (376 MHz, Chloroform-*d*)  $\delta$  -104.55 (s, 1F). **HRMS** (ESI-TOF): Anal Calcd. For. C<sub>22</sub>H<sub>30</sub>FNO<sub>3</sub>S<sub>2</sub>+H<sup>+</sup>: 440.1724, found: 440.1721. **IR** (neat, cm<sup>-1</sup>):  $\nu$  3100, 2958, 2932, 2870, 1491, 1151, 1021, 1002, 838, 793, 627.

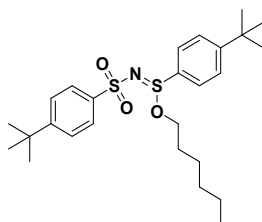

## 5c

petroleum ether / ethyl acetate = 15:1 – 8:1, a viscous waxy oil, 83% yield (79.2 mg). **<sup>1</sup>H NMR** (400 MHz, Chloroform-*d*)  $\delta$  7.90 – 7.87 (m, 2H), 7.74 – 7.71 (m, 2H), 7.56 – 7.52 (m, 2H), 7.48 – 7.44 (m, 2H), 3.92 (dt,  $J = 9.6, 6.6$  Hz, 1H), 3.45 (dt,  $J = 9.7, 6.7$  Hz, 1H), 1.44 – 1.37 (m, 2H), 1.32 (s, 18H), 1.31 (s, 18H), 1.24 – 1.11 (m, 6H), 0.83 (t,  $J = 7.0$  Hz, 3H). **<sup>13</sup>C NMR** (100 MHz, Chloroform-*d*)  $\delta$  157.0, 155.3, 140.6, 132.4, 127.2, 126.5, 126.2, 125.6, 65.4, 35.1, 34.9, 31.14, 31.06, 31.0, 28.9, 25.1, 22.3, 13.9. **HRMS** (ESI-TOF): Anal Calcd. For. C<sub>23</sub>H<sub>30</sub>BrNO<sub>5</sub>S<sub>2</sub>+H<sup>+</sup>: 478.2445, found: 478.2437. **IR** (neat, cm<sup>-1</sup>):  $\nu$  3067, 2958, 2869, 1314, 1021, 1002, 837, 793, 638.

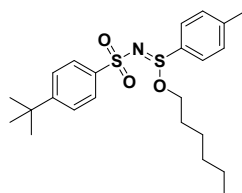

## 5d

petroleum ether / ethyl acetate = 15:1 – 6:1, a yellow solid, 83% yield (72.2 mg). mp: 61 – 63 °C. **<sup>1</sup>H NMR** (400 MHz, Chloroform-*d*)  $\delta$  7.89 – 7.86 (m, 2H), 7.69 – 7.66 (m, 2H), 7.47 – 7.43 (m, 2H), 7.33

– 7.31 (m, 2H), 3.86 (dt,  $J = 9.5, 6.6$  Hz, 1H), 3.38 (dt,  $J = 9.6, 6.8$  Hz, 1H), 2.40 (s, 3H), 1.41 – 1.34 (m, 2H), 1.30 (s, 9H), 1.23 – 1.09 (m, 6H), 0.81 (t,  $J = 7.1$  Hz, 3H).  $^{13}\text{C NMR}$  (100 MHz, Chloroform- $d$ )  $\delta$  155.3, 144.0, 140.6, 132.3, 130.1, 127.3, 126.1, 125.6, 65.0, 34.9, 31.1, 31.0, 28.8, 25.1, 22.3, 21.4, 13.8. **HRMS** (ESI-TOF): Anal Calcd. For.  $\text{C}_{23}\text{H}_{33}\text{NO}_3\text{S}_2 + \text{H}^+$ : 436.1975, found: 436.1967. **IR** (neat,  $\text{cm}^{-1}$ ):  $\nu$  2949, 2871, 1314, 1308, 1153, 1003, 794, 624.

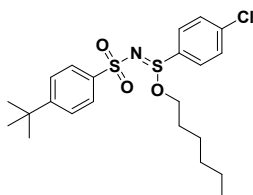

### 5e

petroleum ether / ethyl acetate = 15:1 – 8:1, a viscous waxy oil, 79% yield (71.9 mg).  $^1\text{H NMR}$  (400 MHz, Chloroform- $d$ )  $\delta$  7.89 – 7.85 (m, 2H), 7.76 – 7.73 (m, 2H), 7.53 – 7.46 (m, 4H), 3.89 (dt,  $J = 9.5, 6.6$  Hz, 1H), 3.42 (dt,  $J = 9.5, 6.7$  Hz, 1H), 1.43 – 1.37 (m, 2H), 1.30 (s, 9H), 1.24 – 1.12 (m, 6H), 0.82 (t,  $J = 7.1$  Hz, 3H).  $^{13}\text{C NMR}$  (100 MHz, Chloroform- $d$ )  $\delta$  155.6, 140.2, 139.8, 134.1, 129.8, 128.8, 126.1, 125.7, 65.7, 35.0, 31.1, 31.0, 28.8, 25.1, 22.3, 13.8. **HRMS** (ESI-TOF): Anal Calcd. For.  $\text{C}_{22}\text{H}_{30}\text{ClNO}_3\text{S}_2 + \text{Na}^+$ : 478.1248, found: 478.1247. **IR** (neat,  $\text{cm}^{-1}$ ):  $\nu$  3088, 2957, 2929, 2869, 1437, 1313, 1153, 1023, 1001, 793, 635.

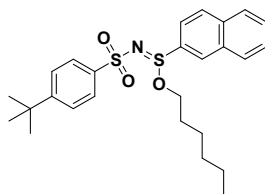

### 5f

petroleum ether / ethyl acetate = 15:1 – 6:1, a colorless oil, 79% yield (74.4 mg).  $^1\text{H NMR}$  (400 MHz, Chloroform- $d$ )  $\delta$  8.40 (s, 1H), 7.98 – 7.93 (m, 4H), 7.90 – 7.88 (m, 1H), 7.75 – 7.72 (m, 1H), 7.66 – 7.58 (m, 2H), 7.49 – 7.47 (m, 2H), 3.91 (dt,  $J = 9.6, 6.6$  Hz, 1H), 3.39 (dt,  $J = 9.5, 6.7$  Hz, 1H), 1.42 – 1.36 (m, 2H), 1.30 (s, 9H), 1.21 – 1.08 (m, 6H), 0.80 (t,  $J = 7.1$  Hz, 3H).  $^{13}\text{C NMR}$  (100 MHz, Chloroform- $d$ )  $\delta$  155.4, 140.5, 135.0, 132.4, 132.3, 129.7, 129.11, 129.06, 128.8, 127.9, 127.7, 126.2, 125.7, 122.1, 65.2, 34.9, 31.1, 31.0, 28.8, 25.1, 22.3, 13.8. **HRMS** (ESI-TOF): Anal Calcd. For.  $\text{C}_{26}\text{H}_{33}\text{NO}_3\text{S}_2 + \text{H}^+$ :

472.1975, found: 472.1970. **IR** (neat,  $\text{cm}^{-1}$ ):  $\nu$  3057, 2956, 2931, 2867, 1306, 1152, 1018, 1003, 794, 630.

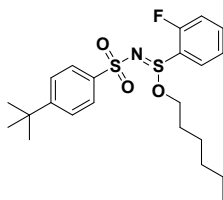

### 5g

petroleum ether / ethyl acetate = 15:1 – 7:1, a colorless solid, 86% yield (75.5 mg). mp: 55 – 57 °C.  **$^1\text{H}$  NMR** (400 MHz, Chloroform-*d*)  $\delta$  8.14 – 8.10 (m, 1H), 7.88 – 7.85 (m, 2H), 7.64 – 7.58 (m, 1H), 7.48 – 7.44 (m, 2H), 7.35 – 7.31 (m, 1H), 7.23 – 7.18 (m, 1H), 3.98 (dt,  $J = 9.5, 6.5$  Hz, 1H), 3.53 (dt,  $J = 9.4, 6.7$  Hz, 1H), 1.46 – 1.39 (m, 2H), 1.30 (s, 9H), 1.24 – 1.12 (m, 6H), 0.81 (t,  $J = 7.1$  Hz, 3H).  **$^{13}\text{C}$  NMR** (100 MHz, Chloroform-*d*)  $\delta$  160.0 (d,  $J = 255.2$  Hz), 155.6, 140.4, 135.7 (d,  $J = 8.2$  Hz), 128.4, 126.2, 125.8, 125.1 (d,  $J = 3.6$  Hz), 123.6 (d,  $J = 13.1$  Hz), 116.7 (d,  $J = 19.8$  Hz), 67.1, 35.0, 31.15, 31.12, 28.9, 25.0, 22.4, 13.9.  **$^{19}\text{F}$  NMR** (376 MHz, Chloroform-*d*)  $\delta$  -111.8 (s, 1F). **HRMS** (ESI-TOF): Anal Calcd. For.  $\text{C}_{22}\text{H}_{30}\text{FNO}_3\text{S}_2+\text{H}^+$ : 440.1724, found: 440.1728. **IR** (neat,  $\text{cm}^{-1}$ ):  $\nu$  3091, 2957, 2929, 2871, 1471, 1305, 1156, 1026, 1011, 796, 764, 635.

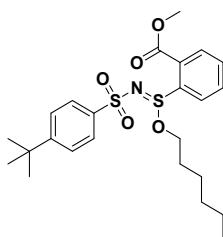

### 5h

petroleum ether / ethyl acetate = 15:1 – 4:1, a viscous waxy oil, 74% yield (70.9 mg).  **$^1\text{H}$  NMR** (400 MHz, Chloroform-*d*)  $\delta$  8.49 – 8.46 (m, 1H), 8.07 – 8.05 (m, 1H), 7.89 – 7.85 (m, 2H), 7.74 – 7.70 (m, 1H), 7.67 – 7.63 (m, 1H), 7.45 – 7.42 (m, 2H), 4.00 (dt,  $J = 9.4, 6.7$  Hz, 1H), 3.92 (s, 3H), 3.68 (dt,  $J = 9.4, 6.7$  Hz, 1H), 1.45 – 1.39 (m, 2H), 1.28 (s, 9H), 1.23 – 1.10 (m, 6H), 0.80 (t,  $J = 7.0$  Hz, 3H).  **$^{13}\text{C}$  NMR** (100 MHz, Chloroform-*d*)  $\delta$  165.0, 155.2, 140.7, 137.6, 133.2, 132.7, 131.4, 128.7, 127.3, 126.1, 125.5, 69.1, 52.9, 34.9, 31.1, 31.0, 29.0, 25.0, 22.3, 13.8. **HRMS** (ESI-TOF): Anal Calcd. For.

$C_{24}H_{33}NO_5S_2+H^+$ : 480.1873, found: 480.1868. **IR** (neat,  $cm^{-1}$ ):  $\nu$  2956, 2869, 1721, 1281, 1152, 1108, 1019, 1004, 632.

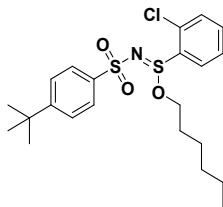

### 5i

petroleum ether / ethyl acetate = 15:1 – 5:1, a colorless solid, 85% yield (77.4 mg). mp: 58 – 60 °C.  **$^1H$  NMR** (400 MHz, Chloroform-*d*)  $\delta$  8.26 – 8.24 (m, 1H), 7.88 – 7.85 (m, 2H), 7.56 – 7.51 (m, 1H), 7.48 – 7.43 (m, 4H), 3.97 (dt,  $J$  = 9.5, 6.5 Hz, 1H), 3.54 (dt,  $J$  = 9.5, 6.7 Hz, 1H), 1.45 – 1.39 (m, 2H), 1.30 (s, 9H), 1.24 – 1.11 (m, 6H), 0.81 (t,  $J$  = 7.1 Hz, 3H).  **$^{13}C$  NMR** (100 MHz, Chloroform-*d*)  $\delta$  155.4, 140.4, 134.5, 134.1, 133.9, 130.7, 128.7, 127.6, 126.1, 125.7, 67.2, 35.0, 31.1, 31.0, 28.8, 25.0, 22.3, 13.8. **HRMS** (ESI-TOF): Anal Calcd. For.  $C_{22}H_{30}ClNO_3S_2+H^+$ : 458.1399, found: 458.1398. **IR** (neat,  $cm^{-1}$ ):  $\nu$  3074, 2958, 2925, 2860, 1450, 1310, 1020, 1008, 773, 633.

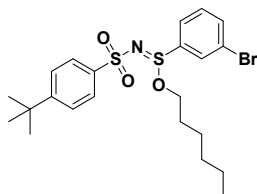

### 5j

petroleum ether / ethyl acetate = 20:1 – 10:1, a viscous waxy oil, 74% yield (73.9 mg).  **$^1H$  NMR** (400 MHz, Chloroform-*d*)  $\delta$  7.94 – 7.93 (m, 1H), 7.89 – 7.85 (m, 2H), 7.71 – 7.68 (m, 2H), 7.49 – 7.45 (m, 2H), 7.43 – 7.39 (m, 1H), 3.90 (dt,  $J$  = 9.5, 6.6 Hz, 1H), 3.43 (dt,  $J$  = 9.6, 6.7 Hz, 1H), 1.45 – 1.36 (m, 2H), 1.30 (s, 9H), 1.24 – 1.10 (m, 6H), 0.82 (t,  $J$  = 7.1 Hz, 3H).  **$^{13}C$  NMR** (100 MHz, Chloroform-*d*)  $\delta$  155.6, 140.2, 137.6, 136.1, 130.9, 130.0, 126.1, 126.0, 125.7, 123.5, 66.0, 34.9, 31.1, 31.0, 28.8, 25.0, 22.3, 13.8. **HRMS** (ESI-TOF): Anal Calcd. For.  $C_{22}H_{30}BrNO_3S_2+H^+$ : 502.0903, found: 502.0902. **IR** (neat,  $cm^{-1}$ ):  $\nu$  3068, 2957, 2931, 2869, 1460, 1153, 1007, 991, 891, 788, 633.



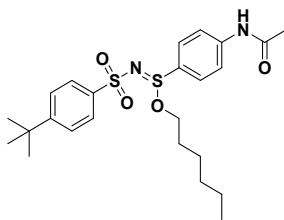

### 5k

petroleum ether / ethyl acetate = 15:1 – 2:1, a yellow oil, 84% yield (80.3 mg). **<sup>1</sup>H NMR** (400 MHz, Chloroform-*d*)  $\delta$  9.12 (s, 1H), 7.99 – 7.95 (m, 2H), 7.89 – 7.86 (m, 2H), 7.72 – 7.68 (m, 2H), 7.51 – 7.48 (m, 2H), 3.72 (dt,  $J = 9.5, 6.6$  Hz, 1H), 3.29 (dt,  $J = 9.4, 6.7$  Hz, 1H), 2.18 (s, 3H), 1.32 (s, 9H), 1.28 – 1.25 (m, 2H), 1.21 – 1.16 (m, 2H), 1.10 – 1.04 (m, 4H), 0.81 (t,  $J = 7.2$  Hz, 3H). **<sup>13</sup>C NMR** (100 MHz, Chloroform-*d*)  $\delta$  169.8, 155.9, 143.8, 140.1, 128.3, 128.1, 126.1, 125.9, 120.0, 65.0, 35.0, 31.11, 31.05, 28.7, 25.1, 24.5, 22.3, 13.9. **HRMS** (ESI-TOF): Anal Calcd. For. C<sub>24</sub>H<sub>34</sub>N<sub>2</sub>O<sub>4</sub>S<sub>2</sub>+H<sup>+</sup>: 479.2033, found: 479.2042. **IR** (neat, cm<sup>-1</sup>):  $\nu$  3327, 3187, 2958, 2929, 2869, 1703, 1590, 1527, 1312, 1149, 1019, 1000, 794, 630.

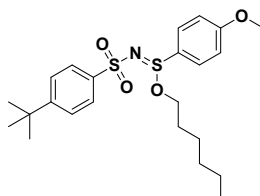

### 5l

petroleum ether / ethyl acetate = 15:1 – 7:1, a viscous waxy oil, 70% yield (63.2 mg). **<sup>1</sup>H NMR** (400 MHz, Chloroform-*d*)  $\delta$  7.89 – 7.86 (m, 2H), 7.75 – 7.72 (m, 2H), 7.47 – 7.44 (m, 2H), 7.03 – 6.99 (m, 2H), 3.87 – 3.81 (m, 4H), 3.38 (dt,  $J = 9.6, 6.8$  Hz, 1H), 1.41 – 1.33 (m, 2H), 1.30 (s, 9H), 1.24 – 1.09 (m, 6H), 0.82 (t,  $J = 7.1$  Hz, 3H). **<sup>13</sup>C NMR** (100 MHz, Chloroform-*d*)  $\delta$  163.4, 155.3, 140.6, 129.3, 126.4, 126.1, 125.6, 114.9, 64.7, 55.6, 34.9, 31.12, 31.05, 28.8, 25.1, 22.3, 13.8. **HRMS** (ESI-TOF): Anal Calcd. For. C<sub>23</sub>H<sub>33</sub>NO<sub>4</sub>S<sub>2</sub>+H<sup>+</sup>: 452.1924, found: 452.1926. **IR** (neat, cm<sup>-1</sup>):  $\nu$  3242, 2956, 2931, 2860, 1594, 1496, 1255, 1165, 1024, 831.

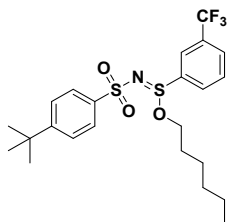

### 5m

petroleum ether / ethyl acetate = 15:1 – 7:1, a yellow oil, 83% yield (81.2 mg). **<sup>1</sup>H NMR** (400 MHz, Chloroform-*d*) δ 8.02 – 7.99 (m, 2H), 7.90 – 7.84 (m, 3H), 7.73 – 7.69 (m, 1H), 7.50 – 7.47 (m, 2H), 3.96 (dt, *J* = 9.6, 6.6 Hz, 1H), 3.49 (dt, *J* = 9.6, 6.7 Hz, 1H), 1.49 – 1.42 (m, 2H), 1.31 (s, 9H), 1.24 – 1.13 (m, 6H), 0.83 (t, *J* = 7.0 Hz, 3H). **<sup>13</sup>C NMR** (100 MHz, Chloroform-*d*) δ 155.7, 140.1, 137.5, 132.2 (q, *J* = 33.6 Hz), 130.8, 130.3, 129.7 (q, *J* = 3.6 Hz), 126.1, 125.8, 124.4 (q, *J* = 3.8 Hz), 123.0 (q, *J* = 271.5 Hz), 66.6, 35.0, 31.1, 31.0, 28.9, 25.1, 22.3, 13.8. **<sup>19</sup>F NMR** (376 MHz, Chloroform-*d*) δ -62.82 (s, 3F). **HRMS** (ESI-TOF): Anal Calcd. For. C<sub>23</sub>H<sub>30</sub>F<sub>3</sub>NO<sub>3</sub>S<sub>2</sub>+H<sup>+</sup>: 490.1692, found: 490.1684. **IR** (neat, cm<sup>-1</sup>): ν 3074, 2960, 2871, 1323, 1153, 1132, 1021, 1010, 994, 792, 693, 638.

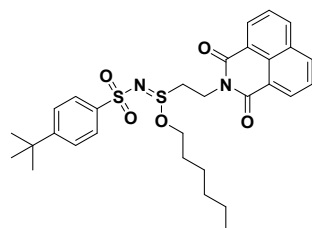

### 5n

petroleum ether / ethyl acetate = 15:1 – 3:1, a white solid, 38% yield (43.2 mg). mp: 111 – 113 °C. **<sup>1</sup>H NMR** (400 MHz, Chloroform-*d*) δ 8.60 – 8.58 (m, 2H), 8.26 – 8.23 (m, 2H), 7.85 – 7.82 (m, 2H), 7.79 – 7.75 (m, 2H), 7.44 – 7.41 (m, 2H), 4.62 – 4.48 (m, 2H), 4.10 (dt, *J* = 9.5, 6.7 Hz, 1H), 4.00 (dt, *J* = 9.5, 6.8 Hz, 1H), 3.67 (dt, *J* = 13.9, 5.8 Hz, 1H), 3.45 – 3.38 (m, 1H), 1.56 – 1.49 (m, 2H), 1.29 (s, 9H), 1.24 – 1.17 (m, 6H), 0.84 (t, *J* = 6.9 Hz, 3H). **<sup>13</sup>C NMR** (100 MHz, Chloroform-*d*) δ 163.9, 155.3, 140.5, 134.6, 131.7, 131.6, 128.1, 127.1, 126.2, 125.6, 122.0, 70.8, 52.1, 35.0, 34.2, 31.2, 31.1, 29.4, 25.1, 22.4, 13.9. **HRMS** (ESI-TOF): Anal Calcd. For. C<sub>30</sub>H<sub>36</sub>N<sub>2</sub>O<sub>5</sub>S<sub>2</sub>+H<sup>+</sup>: 569.2139, found: 569.2138. **IR** (neat, cm<sup>-1</sup>): ν 2961, 2902, 2870, 1700, 1684, 1148, 993, 778, 628.

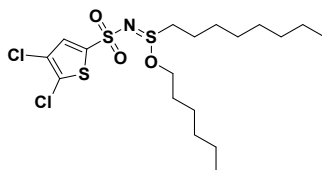

### 5o

petroleum ether / ethyl acetate = 15:1 – 8:1, a viscous waxy oil, 59% yield (56.1 mg). **<sup>1</sup>H NMR** (400 MHz, Chloroform-*d*)  $\delta$  7.35 (s, 1H), 4.11 – 4.02 (m, 2H), 3.19 – 3.06 (m, 2H), 1.69 – 1.61 (m, 4H), 1.38 – 1.22 (m, 16H), 0.90 – 0.85 (m, 6H). **<sup>13</sup>C NMR** (100 MHz, Chloroform-*d*)  $\delta$  141.6, 129.7, 129.0, 124.1, 71.1, 52.5, 31.6, 31.2, 29.4, 29.0, 28.8, 28.2, 25.1, 22.5, 22.4, 14.0, 13.9. **HRMS** (ESI-TOF): Anal Calcd. For. C<sub>18</sub>H<sub>31</sub>Cl<sub>2</sub>NO<sub>3</sub>S<sub>3</sub>+Na<sup>+</sup>: 498.0736, found: 498.0735. **IR** (neat, cm<sup>-1</sup>):  $\nu$  3247, 3092, 2956, 2926, 2857, 1322, 1164, 1139, 1022, 923.

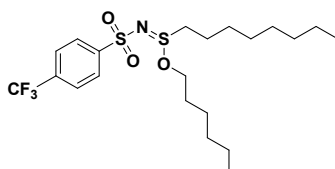

### 5p

petroleum ether / ethyl acetate = 15:1 – 6:1, a colorless oil, 42% yield (39.4 mg). **<sup>1</sup>H NMR** (400 MHz, Chloroform-*d*)  $\delta$  8.04 – 8.02 (m, 2H), 7.73 – 7.71 (m, 2H), 4.06 – 3.96 (m, 2H), 3.16 – 3.03 (m, 2H), 1.64 – 1.53 (m, 4H), 1.31 – 1.19 (m, 16H), 0.88 – 0.84 (m, 6H). **<sup>13</sup>C NMR** (100 MHz, Chloroform-*d*)  $\delta$  147.0 (q, *J* = 1.2 Hz), 133.5 (q, *J* = 33.1 Hz), 126.8, 125.8 (q, *J* = 3.7 Hz), 123.3 (q, *J* = 272.7 Hz), 70.5, 52.5, 31.5, 31.2, 29.4, 28.9, 28.8, 28.1, 25.1, 22.53, 22.48, 22.4, 14.0, 13.9. **<sup>19</sup>F NMR** (376 MHz, Chloroform-*d*)  $\delta$  -63.03 (s, 3F). **HRMS** (ESI-TOF): Anal Calcd. For. C<sub>21</sub>H<sub>34</sub>F<sub>3</sub>NO<sub>3</sub>S<sub>2</sub>+H<sup>+</sup>: 470.2005, found: 470.2005. **IR** (neat, cm<sup>-1</sup>):  $\nu$  2957, 2928, 2858, 1321, 1152, 1132, 1062, 1005, 709.

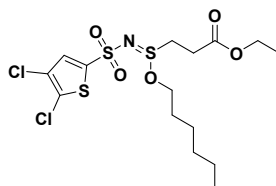

### 5q

petroleum ether / ethyl acetate = 15:1 – 7:1, a viscous waxy oil, 55% yield (50.9 mg). **<sup>1</sup>H NMR** (400 MHz, Chloroform-*d*) δ 7.33 (s, 1H), 4.17 – 4.08 (m, 4H), 3.47 – 3.40 (m, 1H), 3.30 (dt, *J* = 13.3, 6.0 Hz, 1H), 2.85 – 2.71 (m, 2H), 1.70 – 1.63 (m, 2H), 1.34 – 1.23 (m, 9H), 0.90 – 0.86 (m, 3H). **<sup>13</sup>C NMR** (100 MHz, Chloroform-*d*) δ 170.1, 141.3, 129.8, 129.1, 124.1, 71.9, 61.7, 47.5, 31.2, 29.5, 27.3, 25.1, 22.4, 14.0, 13.9. **HRMS** (ESI-TOF): Anal Calcd. For. C<sub>15</sub>H<sub>23</sub>Cl<sub>2</sub>NO<sub>5</sub>S<sub>3</sub>+Na<sup>+</sup>: 487.9979, found: 487.9983. **IR** (neat, cm<sup>-1</sup>): ν 3098, 2957, 1931, 2871, 1727, 1316, 1137, 1019, 907, 617.

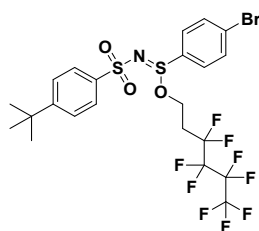

### 6a

petroleum ether / ethyl acetate = 15:1 – 7:1, a colorless solid, 78% yield (103.1 mg). mp: 109 – 111 °C. **<sup>1</sup>H NMR** (400 MHz, Chloroform-*d*) δ 7.89 – 7.86 (m, 2H), 7.72 – 7.67 (m, 4H), 7.51 – 7.47 (m, 2H), 4.21 (dt, *J* = 10.7, 6.3 Hz, 1H), 3.72 (dt, *J* = 10.7, 6.5 Hz, 1H), 2.32 – 2.18 (m, 2H), 1.30 (s, 9H). **<sup>13</sup>C NMR** (100 MHz, Chloroform-*d*) δ 156.1, 139.7, 133.9, 133.0, 128.9, 128.8, 126.2, 125.9, 56.8, 56.72, 56.67, 35.0, 31.0, 30.9, 30.8, 30.6. **<sup>19</sup>F NMR** (376 MHz, Chloroform-*d*) δ -81.04 – -81.11 (m, 3F), -113.37 – -113.60 (m, 2F), -124.38 – -124.46 (m, 2F), -126.00 – -126.10 (m, 2F). **HRMS** (ESI-TOF): Anal Calcd. For. C<sub>22</sub>H<sub>21</sub>BrF<sub>9</sub>NO<sub>3</sub>S<sub>2</sub>+Na<sup>+</sup>: 685.9875, found: 685.9868. **IR** (neat, cm<sup>-1</sup>): ν 2970, 2902, 1231, 1218, 1133, 976, 825, 799, 706.

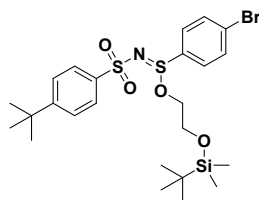

### 6b

petroleum ether / ethyl acetate = 15:1 – 7:1, a colorless oil, 70% yield (80.2 mg). **<sup>1</sup>H NMR** (400 MHz, Chloroform-*d*) δ 7.88 – 7.85 (m, 2H), 7.71 – 7.63 (m, 4H), 7.48 – 7.45 (m, 2H), 4.08 – 4.02 (m, 1H), 3.68 – 3.63 (m, 3H), 1.31 (s, 9H), 0.84 (s, 9H), 0.01 (d, *J* = 7.4 Hz, 6H). **<sup>13</sup>C NMR** (100 MHz, Chloroform-*d*) δ 155.6, 140.1, 134.9, 132.7, 129.0, 128.3, 126.2, 125.7, 67.9, 61.3, 35.0, 31.0, 25.7, 18.1, -5.4, -5.5.

**HRMS** (ESI-TOF): Anal Calcd. For.  $C_{24}H_{36}BrNO_4Si+Na^+$ : 596.0931, found: 596.0920. **IR** (neat,  $cm^{-1}$ ):  $\nu$  2964, 2929, 2872, 1639, 1279, 1152, 1001, 839, 780, 732, 633.

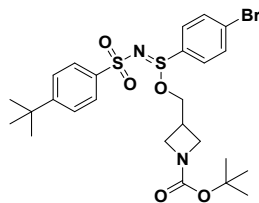

### 6c

petroleum ether / ethyl acetate = 15:1 – 3:1, a white solid, 63% yield (73.6 mg). mp: 121 – 123 °C. **<sup>1</sup>H NMR** (400 MHz, Chloroform-*d*)  $\delta$  7.87 – 7.83 (m, 2H), 7.70 – 7.65 (m, 4H), 7.49 – 7.46 (m, 2H), 4.07 – 4.03 (m, 1H), 3.86 – 3.82 (m, 2H), 3.55 – 3.51 (m, 1H), 3.47 – 3.44 (m, 2H), 2.58 – 2.52 (m, 1H), 1.38 (s, 9H), 1.30 (s, 9H). **<sup>13</sup>C NMR** (100 MHz, Chloroform-*d*)  $\delta$  156.0, 155.9, 139.8, 134.2, 133.0, 128.8, 128.7, 126.1, 125.8, 79.6, 65.9, 35.0, 31.0, 29.6, 28.2, 27.8. **HRMS** (ESI-TOF): Anal Calcd. For.  $C_{25}H_{33}BrN_2O_5S_2+H^+$ : 587.1067, found: 587.1070. **IR** (neat,  $cm^{-1}$ ):  $\nu$  3085, 2962, 2925, 2869, 1598, 1253, 1152, 999, 883, 766.

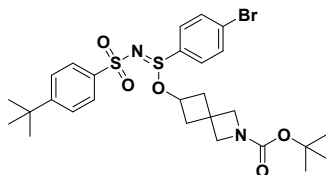

### 6d

petroleum ether / ethyl acetate = 15:1 – 2:1, a viscous waxy oil, 80% yield (97.6 mg). **<sup>1</sup>H NMR** (400 MHz, Chloroform-*d*)  $\delta$  7.83 – 7.80 (m, 2H), 7.67 – 7.62 (m, 4H), 7.47 – 7.44 (m, 2H), 4.55 – 4.48 (m, 1H), 3.74 – 3.69 (m, 4H), 2.34 – 2.28 (m, 1H), 2.14 – 2.01 (m, 3H), 1.36 (s, 9H), 1.29 (s, 9H). **<sup>13</sup>C NMR** (100 MHz, Chloroform-*d*)  $\delta$  155.8, 155.7, 140.0, 135.0, 132.8, 128.7, 128.4, 126.1, 125.7, 79.4, 66.3, 42.0, 41.8, 35.0, 31.0, 30.7, 28.2. **HRMS** (ESI-TOF): Anal Calcd. For.  $C_{27}H_{35}BrN_2O_5S_2+Na^+$ : 633.1063, found: 633.1061. **IR** (neat,  $cm^{-1}$ ):  $\nu$  3350, 2972, 2932, 2877, 1681, 1418, 1199, 1086, 1046, 1004, 880, 637.

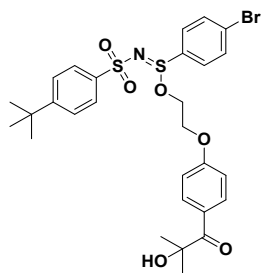

### 6e

petroleum ether / ethyl acetate = 15:1 – 2:1, a viscous waxy oil, 70% yield (87.0 mg). **<sup>1</sup>H NMR** (400 MHz, Chloroform-*d*)  $\delta$  8.06 – 8.02 (m, 2H), 7.90 – 7.86 (m, 2H), 7.72 – 7.66 (m, 4H), 7.50 – 7.47 (m, 2H), 6.87 – 6.84 (m, 2H), 4.41 – 4.36 (m, 1H), 4.18 – 4.07 (m, 3H), 4.00 – 3.95 (m, 1H), 1.62 (s, 6H), 1.31 (s, 9H). **<sup>13</sup>C NMR** (100 MHz, Chloroform-*d*)  $\delta$  202.5, 161.7, 156.0, 139.7, 134.4, 132.9, 132.4, 129.0, 128.7, 126.6, 126.2, 125.9, 114.1, 75.9, 65.9, 63.7, 35.1, 31.1, 28.6. **HRMS** (ESI-TOF): Anal Calcd. For. C<sub>28</sub>H<sub>32</sub>BrNO<sub>6</sub>S<sub>2</sub>+Na<sup>+</sup>: 644.0747, found: 644.0747. **IR** (neat, cm<sup>-1</sup>):  $\nu$  3083, 2961, 2924, 2869, 1598, 1253, 999, 791, 632.

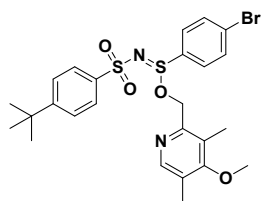

### 6f

petroleum ether / ethyl acetate = 15:1 – 3:1, a viscous waxy oil, 70% yield (79.0 mg). **<sup>1</sup>H NMR** (400 MHz, Chloroform-*d*)  $\delta$  8.14 (s, 1H), 7.91 – 7.88 (m, 2H), 7.77 – 7.73 (m, 2H), 7.67 – 7.63 (m, 2H), 7.49 – 7.46 (m, 2H), 5.18 (d, *J* = 11.0 Hz, 1H), 4.66 (d, *J* = 11.0 Hz, 1H), 3.72 (s, 3H), 2.22 (s, 3H), 2.12 (s, 3H), 1.31 (s, 9H). **<sup>13</sup>C NMR** (100 MHz, Chloroform-*d*)  $\delta$  164.2, 155.6, 151.5, 149.4, 140.1, 134.7, 132.8, 129.2, 128.4, 127.0, 126.6, 126.2, 125.8, 66.8, 59.9, 35.0, 31.1, 13.3, 10.6. **HRMS** (ESI-TOF): Anal Calcd. For. C<sub>25</sub>H<sub>29</sub>BrN<sub>2</sub>O<sub>4</sub>S<sub>2</sub>+H<sup>+</sup>: 567.0805, found: 567.0803. **IR** (neat, cm<sup>-1</sup>):  $\nu$  3063, 2963, 2904, 2869, 1570, 1471, 1265, 1085, 1065, 1002, 726, 630.

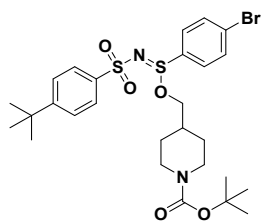

### 6g

petroleum ether / ethyl acetate = 15:1 – 4:1, a viscous waxy oil, 84% yield (102.8 mg). **<sup>1</sup>H NMR** (400 MHz, Chloroform-*d*)  $\delta$  7.87 – 7.84 (m, 2H), 7.70 – 7.64 (m, 4H), 7.49 – 7.45 (m, 2H), 4.01 (s, 2H),  $\delta$  3.75 (dd,  $J = 9.5, 6.2$  Hz, 1H), 3.20 (dd,  $J = 9.5, 6.5$  Hz, 1H), 2.56 (t,  $J = 11.5$  Hz, 2H), 1.63 – 1.41 (m, 15H), 1.30 (s, 9H), 1.00 – 0.88 (m, 2H). **<sup>13</sup>C NMR** (100 MHz, Chloroform-*d*)  $\delta$  155.7, 154.5, 140.2, 134.4, 132.9, 128.8, 128.5, 126.2, 125.8, 79.5, 68.7, 35.8, 35.0, 31.1, 28.3. **HRMS** (ESI-TOF): Anal Calcd. For. C<sub>27</sub>H<sub>37</sub>BrN<sub>2</sub>O<sub>5</sub>S<sub>2</sub>+H<sup>+</sup>: 615.1380, found:615.1387. **IR** (neat, cm<sup>-1</sup>):  $\nu$  3086, 2966, 2868, 1684, 1151, 1001, 910, 728, 636.

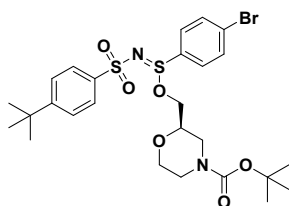

### 6h

petroleum ether / ethyl acetate = 15:1 – 4:1, a viscous waxy oil, 80% yield (98.3 mg). **<sup>1</sup>H NMR** (400 MHz, Chloroform-*d*)  $\delta$  7.87 – 7.83 (m, 2H), 7.70 – 7.63 (m, 4H), 7.48 – 7.44 (m, 2H), 3.98 – 3.91 (m, 1H), 3.77 – 3.67 (m, 3H), 3.52 – 3.34 (m, 3H), 2.87 – 2.74 (m, 1H), 2.53 – 2.38 (m, 1H), 1.42 (s, 9H), 1.28 (s, 9H). **<sup>13</sup>C NMR** (100 MHz, Chloroform-*d*)  $\delta$  155.7 (d,  $J = 3.6$  Hz), 154.3 (d,  $J = 1.9$  Hz), 139.8 (d,  $J = 5.0$  Hz), 134.3 (d,  $J = 26.5$  Hz), 132.8 (d,  $J = 5.1$  Hz), 128.9 (d,  $J = 3.9$  Hz), 128.5 (d,  $J = 5.7$  Hz), 126.1 (d,  $J = 1.4$  Hz), 125.8 (d,  $J = 2.2$  Hz), 80.3, 72.9, 72.8, 66.1, 34.9, 31.0, 28.2. **HRMS** (ESI-TOF): Anal Calcd. For. C<sub>26</sub>H<sub>35</sub>BrN<sub>2</sub>O<sub>6</sub>S<sub>2</sub>+H<sup>+</sup>: 617.1173, found: 617.1171. **IR** (neat, cm<sup>-1</sup>):  $\nu$  3086, 2967, 2907, 2867, 1736, 1694, 1239, 1154, 1001, 950, 791, 731, 637.

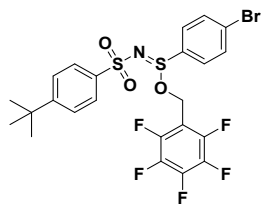

**6i**

petroleum ether / ethyl acetate = 15:1 – 7:1, a yellow solid, 64% yield (76.2 mg). mp: 139 – 141 °C. <sup>1</sup>H NMR (400 MHz, Chloroform-*d*) δ 7.94 – 7.93 (m, 1H), 7.89 – 7.85 (m, 2H), 7.71 – 7.68 (m, 2H), 7.49 – 7.45 (m, 2H), 7.43 – 7.39 (m, 1H), 3.90 (dt, *J* = 9.5, 6.6 Hz, 1H), 3.43 (dt, *J* = 9.6, 6.7 Hz, 1H), 1.45 – 1.36 (m, 2H), 1.30 (s, 9H), 1.24 – 1.10 (m, 6H), 0.82 (t, *J* = 7.1 Hz, 3H). <sup>19</sup>F NMR (376 MHz, Chloroform-*d*) δ -140.98 – -141.08 (m, 2F), -150.49 – -150.61 (m, 1F), -160.71 – -160.86 (m, 2F). <sup>13</sup>C NMR (100 MHz, Chloroform-*d*) δ 156.0, 139.6, 133.8, 133.0, 129.1, 129.0, 126.2, 125.9, 53.5, 35.0, 31.0. HRMS (ESI-TOF): Anal Calcd. For. C<sub>23</sub>H<sub>19</sub>BrF<sub>5</sub>NO<sub>3</sub>S<sub>2</sub>+Na<sup>+</sup>: 619.9782, found: 619.9783. IR (neat, cm<sup>-1</sup>): ν 2966, 2904, 1720, 1313, 1150, 1000, 920, 732, 635.

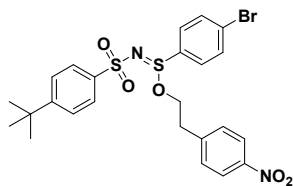

**6j**

petroleum ether / ethyl acetate = 15:1 – 4:1, a yellow solid, 75% yield (84.6 mg). mp: 123 – 125 °C. <sup>1</sup>H NMR (400 MHz, Chloroform-*d*) δ 8.10 – 8.07 (m, 2H), 7.87 – 7.84 (m, 2H), 7.62 – 7.58 (m, 2H), 7.55 – 7.52 (m, 2H), 7.49 – 7.46 (m, 2H), 7.24 – 7.20 (m, 2H), 4.24 (dt, *J* = 10.1, 6.4 Hz, 1H), 3.72 (dt, *J* = 10.1, 6.9 Hz, 1H), 2.90 – 2.82 (m, 2H), 1.29 (s, 9H). <sup>13</sup>C NMR (100 MHz, Chloroform-*d*) δ 155.9, 146.9, 144.3, 139.8, 134.2, 132.8, 129.7, 128.7, 128.6, 126.1, 125.8, 123.6, 64.6, 35.1, 35.0, 31.0. HRMS (ESI-TOF): Anal Calcd. For. C<sub>24</sub>H<sub>25</sub>BrN<sub>2</sub>O<sub>5</sub>S<sub>2</sub>+H<sup>+</sup>: 567.0441, found: 567.0450. IR (neat, cm<sup>-1</sup>): ν 2967, 2931, 2902, 1515, 1346, 1282, 1144, 998, 747, 641.

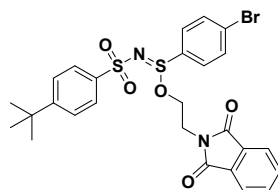

**6k**



petroleum ether / ethyl acetate = 15:1 – 3:1, a white solid, 58% yield (68.2 mg). mp: 110 – 112 °C. <sup>1</sup>H NMR (400 MHz, Chloroform-*d*) δ 7.86 – 7.80 (m, 4H), 7.76 – 7.71 (m, 2H), 7.65 – 7.61 (m, 2H), 7.53 – 7.46 (m, 4H), 4.09 – 4.05 (m, 1H), 3.89 – 3.80 (m, 2H), 3.71 – 3.66 (m, 1H), 1.31 (s, 9H). <sup>13</sup>C NMR (100 MHz, Chloroform-*d*) δ 167.6, 155.8, 139.7, 134.4, 134.2, 132.8, 131.7, 128.8, 128.6, 126.2, 125.9, 123.4, 62.1, 36.9, 35.0, 31.1. HRMS (ESI-TOF): Anal Calcd. For. C<sub>26</sub>H<sub>25</sub>BrN<sub>2</sub>O<sub>5</sub>S<sub>2</sub>+Na<sup>+</sup>: 611.0281, found:611.0281. IR (neat, cm<sup>-1</sup>): ν 2967, 2904, 1720, 1409, 1312, 1148, 1000, 731, 635.

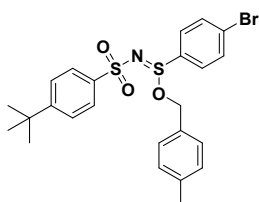

### 6l

petroleum ether / ethyl acetate = 20:1 – 10:1, a yellow solid, 48% yield (49.8 mg). mp: 150 – 152 °C. <sup>1</sup>H NMR (400 MHz, Chloroform-*d*) δ 7.93 – 7.90 (m, 2H), 7.71 – 7.65 (m, 4H), 7.50 – 7.47 (m, 2H), 7.09 – 7.07(m, 2H), 6.96 – 6.94 (m, 2H), 4.84 (d, *J* = 10.8 Hz, 1H), 4.42 (d, *J* = 10.8 Hz, 1H), 2.32 (s, 3H), 1.33 (s, 9H). <sup>13</sup>C NMR (100 MHz, Chloroform-*d*) δ 155.7, 140.2, 139.1, 134.7, 132.8, 130.6, 129.3, 129.1, 129.0, 128.4, 126.3, 125.9, 67.3, 35.0, 31.1, 21.2. HRMS (ESI-TOF): Anal Calcd. For. C<sub>24</sub>H<sub>26</sub>BrNO<sub>3</sub>S<sub>2</sub>+Na<sup>+</sup>: 542.0430, found:542.0431. IR (neat, cm<sup>-1</sup>): ν 2962, 2922, 2855, 1464, 1291, 1152, 1024, 1003, 795, 727, 632.

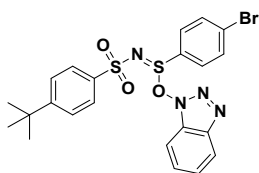

### 6m

petroleum ether / ethyl acetate = 20:1 – 15:1, a viscous waxy oil, 40% yield (42.6 mg). <sup>1</sup>H NMR (400 MHz, Chloroform-*d*) δ 8.10 – 8.07(m, 1H), 8.03 – 7.99 (m, 3H), 7.85 – 7.82 (m, 2H), 7.77 – 7.74 (m, 2H), 7.68 – 7.64 (m, 1H), 7.56 – 7.53 (m, 2H), 7.48 – 7.44 (m, 1H), 1.33 (s, 9H). <sup>13</sup>C NMR (100 MHz, Chloroform-*d*) δ 157.5, 142.7, 138.4, 133.2, 132.7, 131.1, 130.6, 129.7, 129.0, 126.9, 126.2, 125.6, 120.0,

110.3, 35.2, 31.0. **HRMS** (ESI-TOF): Anal Calcd. For.  $C_{22}H_{21}BrN_4O_3S_2+Na^+$ : 551.0131, found: 555.0137. **IR** (neat,  $cm^{-1}$ ):  $\nu$  3085, 2960, 2930, 2870, 1685, 1163, 1149, 1068, 1004, 746.

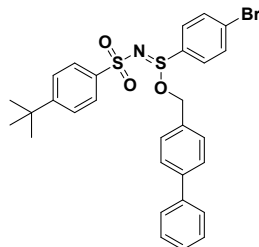

### 6n

petroleum ether / ethyl acetate = 15:1 – 6:1, a colorless solid, 66% yield (76.7 mg). mp: 114 – 116 °C.  **$^1H$  NMR** (400 MHz, Chloroform-*d*)  $\delta$  7.95 – 7.92 (m, 2H), 7.73 – 7.67 (m, 4H), 7.55 – 7.48 (m, 6H), 7.46 – 7.41 (m, 2H), 7.37 – 7.33 (m, 1H), 7.17 – 7.13 m, 2H), 4.94 (d,  $J$  = 10.9 Hz, 1H), 4.50 (d,  $J$  = 10.9 Hz, 1H), 1.32 (s, 9H).  **$^{13}C$  NMR** (100 MHz, Chloroform-*d*)  $\delta$  155.8, 142.0, 140.2, 140.1, 134.6, 132.9, 132.6, 129.5, 129.0, 128.8, 128.5, 127.6, 127.4, 127.0, 126.3, 125.9, 66.9, 35.0, 31.1. **HRMS** (ESI-TOF): Anal Calcd. For.  $C_{29}H_{28}BrNO_3S_2+Na^+$ : 604.0587, found: 604.0588. **IR** (neat,  $cm^{-1}$ ):  $\nu$  2966, 2908, 2872, 1719, 1384, 1312, 1142, 1000, 730, 635.

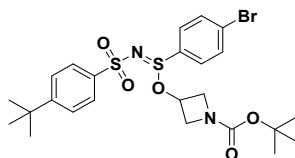

### 6o

petroleum ether / ethyl acetate = 15:1 – 4:1, a viscous waxy oil, 61% yield (69.6 mg).  **$^1H$  NMR** (400 MHz, Chloroform-*d*)  $\delta$  7.85 – 7.81 (m, 2H), 7.70 – 7.68 (m, 4H), 7.50 – 7.46 (m, 2H), 4.91 (s, 1H), 3.87 (s, 1H), 3.74 – 3.70 (m, 2H), 3.59 (s, 1H), 1.36 (s, 9H), 1.31 (s, 9H).  **$^{13}C$  NMR** (100 MHz, Chloroform-*d*)  $\delta$  156.1, 155.6, 139.6, 133.1, 128.6, 126.1, 125.9, 100.0, 80.1, 35.0, 31.0, 28.2. **HRMS** (ESI-TOF): Anal Calcd. For.  $C_{24}H_{31}BrN_2O_5S_2+H^+$ : 573.0911, found: 573.0925. **IR** (neat,  $cm^{-1}$ ):  $\nu$  2967, 2904, 2883, 1718, 1312, 1149, 998, 731, 634.

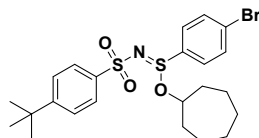

### 6p

petroleum ether / ethyl acetate = 20:1 – 10:1, a yellow solid, 60% yield (61.3 mg). mp: 113 – 115 °C. **<sup>1</sup>H NMR** (400 MHz, Chloroform-*d*) δ 7.87 – 7.84 (m, 2H), 7.67 – 7.63 (s, 4H), 7.48 – 7.44 (m, 2H), 4.56 – 4.50 (m, 1H), 1.96 – 1.88 (m, 1H), 1.74 – 1.45 (m, 9H), 1.30 (s, 9H), 1.27 – 1.20 (m, 2H). **<sup>13</sup>C NMR** (100 MHz, Chloroform-*d*) δ 155.5, 140.4, 136.3, 132.6, 128.6, 127.9, 126.1, 125.7, 82.8, 35.0, 34.9, 31.0, 27.99, 27.97, 22.3, 22.2. **HRMS** (ESI-TOF): Anal Calcd. For. C<sub>23</sub>H<sub>30</sub>BrNO<sub>3</sub>S<sub>2</sub>+Na<sup>+</sup>: 536.0723, found: 536.0719. **IR** (neat, cm<sup>-1</sup>): ν 2927, 2861, 1304, 1151, 1025, 999, 819, 776, 732, 633.

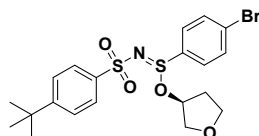

### 6q

petroleum ether / ethyl acetate = 15:1 – 2:1, a viscous waxy oil, 42% yield (40.7 mg). **<sup>1</sup>H NMR** (400 MHz, Chloroform-*d*) δ 7.88 – 7.83 (m, 2H), 7.70 – 7.65 (m, 4H), 7.50 – 7.46 (m, 2H), 5.07 – 4.99 (m, 1H), 3.84 – 3.53 (m, 4H), 2.08 – 1.79 (m, 2H), 1.31 (d, *J* = 1.3 Hz, 9H). **<sup>13</sup>C NMR** (100 MHz, Chloroform-*d*) δ 155.91, 155.89, 139.9, 135.23, 135.19, 133.0, 132.9, 128.73, 128.68, 128.6, 128.5, 126.2, 126.1, 125.88, 125.86, 79.0, 78.5, 73.0, 72.9, 66.8, 66.7, 35.0, 33.6, 33.4, 31.0. **HRMS** (ESI-TOF): Anal Calcd. For. C<sub>20</sub>H<sub>24</sub>BrNO<sub>4</sub>S<sub>2</sub>+H<sup>+</sup>: 486.0403, found: 486.0403. **IR** (neat, cm<sup>-1</sup>): ν 2966, 2908, 2872, 1719, 1409, 1146, 1000, 730, 635.

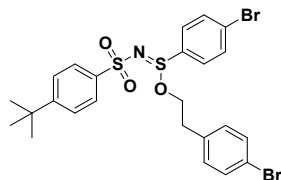

### 6r

petroleum ether / ethyl acetate = 15:1 – 5:1, a colorless solid, 90% yield (107.5 mg). mp: 100 – 102 °C. **<sup>1</sup>H NMR** (400 MHz, Chloroform-*d*) δ 7.88 – 7.85 (m, 2H), 7.59 – 7.56 (m, 2H), 7.50 – 7.45 (m, 4H),

7.35 – 7.32 (m, 2H), 6.89 – 6.86 (m, 2H), 4.10 (dt,  $J = 9.9, 6.4$  Hz, 1H), 3.61 (dt,  $J = 9.9, 7.1$  Hz, 1H), 2.72 – 2.60 (m, 2H), 1.29 (s, 9H).  $^{13}\text{C NMR}$  (100 MHz, Chloroform-*d*)  $\delta$  155.7, 139.9, 135.5, 134.2, 132.7, 131.5, 130.5, 128.7, 128.3, 126.1, 125.8, 120.6, 65.4, 34.9, 34.6, 31.0. **HRMS** (ESI-TOF): Anal Calcd. For.  $\text{C}_{24}\text{H}_{25}\text{Br}_2\text{NO}_3\text{S}_2+\text{Na}^+$ : 619.9535, found: 615.9537. **IR** (neat,  $\text{cm}^{-1}$ ):  $\nu$  3082, 3059, 2963, 2930, 2868, 1298, 1284, 813, 745, 641.

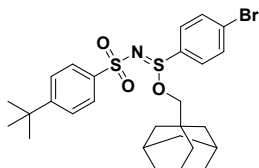

### 6s

petroleum ether / ethyl acetate = 15:1 – 8:1, a colorless solid, 87% yield (98.0 mg). mp: 140 – 142 °C.  $^1\text{H NMR}$  (400 MHz, Chloroform-*d*)  $\delta$  7.90 – 7.86 (m, 2H), 7.70 – 7.65 (m, 4H), 7.49 – 7.46 (m, 2H), 3.38 (d,  $J = 9.1$  Hz, 1H), 2.85 (d,  $J = 9.1$  Hz, 1H), 1.89 – 1.87 (m, 3H), 1.68 – 1.63 (m, 3H), 1.54 – 1.50 (m, 3H), 1.31 (s, 9H), 1.26 (d,  $J = 2.9$  Hz, 6H).  $^{13}\text{C NMR}$  (100 MHz, Chloroform-*d*)  $\delta$  155.5, 140.5, 134.6, 132.8, 129.0, 128.2, 126.2, 125.8, 74.2, 38.8, 36.6, 35.0, 33.3, 31.1, 27.7. **HRMS** (ESI-TOF): Anal Calcd. For.  $\text{C}_{27}\text{H}_{34}\text{BrNO}_3\text{S}_2+\text{H}^+$ : 566.1216, found: 566.1217. **IR** (neat,  $\text{cm}^{-1}$ ):  $\nu$  3264, 3088, 2902, 2848, 1717, 1251, 1159, 1032, 1000, 818, 739.

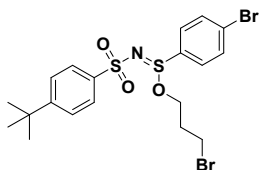

### 6t

petroleum ether / ethyl acetate = 15:1 – 5:1, a colorless solid, 86% yield (92.0 mg). mp: 77 – 79 °C.  $^1\text{H NMR}$  (400 MHz, Chloroform-*d*)  $\delta$  7.88 – 7.85 (m, 2H), 7.71 – 7.67 (m, 4H), 7.50 – 7.46 (m, 2H), 4.08 – 4.02 (m, 1H), 3.60 – 3.54 (m, 1H), 3.29 – 3.20 (m, 2H), 1.97 – 1.89 (m, 2H), 1.31 (s, 9H).  $^{13}\text{C NMR}$  (100 MHz, Chloroform-*d*)  $\delta$  155.8, 140.0, 134.2, 132.9, 128.9, 128.6, 126.1, 125.8, 62.6, 35.0, 31.7, 31.0, 28.6. **HRMS** (ESI-TOF): Anal Calcd. For.  $\text{C}_{19}\text{H}_{23}\text{Br}_2\text{NO}_3\text{S}_2+\text{H}^+$ : 537.9539, found: 537.9537. **IR** (neat,  $\text{cm}^{-1}$ ):  $\nu$  2962, 2923, 2902, 1307, 983, 961, 869, 801, 628.

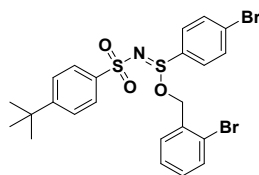

### 6u

petroleum ether / ethyl acetate = 15:1 – 6:1, a light yellow solid, 85% yield (99.1 mg). mp: 116 – 118 °C. **<sup>1</sup>H NMR** (400 MHz, Chloroform-*d*) δ 7.92 – 7.89 (m, 2H), 7.77 – 7.72 (m, 2H), 7.69 – 7.65 (m, 2H), 7.50 – 7.45 (m, 3H), 7.24 – 7.15 (m, 2H), 7.13 – 7.10 (m, 1H), 4.98 (d, *J* = 11.4 Hz, 1H), 4.60 (d, *J* = 11.3 Hz, 1H), 1.31 (s, 9H). **<sup>13</sup>C NMR** (100 MHz, Chloroform-*d*) δ 155.7, 140.0, 134.4, 133.4, 132.9, 132.8, 131.3, 130.6, 129.0, 128.6, 127.6, 126.2, 125.9, 124.2, 66.7, 35.0, 31.1. **HRMS** (ESI-TOF): Anal Calcd. For. C<sub>23</sub>H<sub>23</sub>Br<sub>2</sub>NO<sub>3</sub>S<sub>2</sub>+Na<sup>+</sup>: 607.9358, found: 607.9354. **IR** (neat, cm<sup>-1</sup>): ν 3087, 2965, 2926, 2872, 1639, 1279, 1152, 1000, 846, 779, 731, 663.

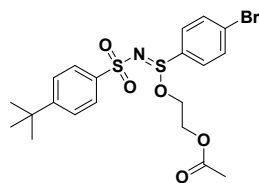

### 6v

petroleum ether / ethyl acetate = 15:1 – 5:1, a viscous waxy oil, 50% yield (50.1 mg). **<sup>1</sup>H NMR** (400 MHz, Chloroform-*d*) δ 7.87 – 7.84 (m, 2H), 7.68 (s, 4H), 7.50 – 7.45 (m, 2H), 4.15 – 4.10 (m, 1H), 4.07 – 4.00 (m, 2H), 3.72 – 3.66 (m, 1H), 2.01 (s, 3H), 1.30 (s, 9H). **<sup>13</sup>C NMR** (100 MHz, Chloroform-*d*) δ 170.4, 155.9, 139.8, 134.4, 132.9, 128.9, 128.7, 126.2, 125.8, 63.1, 61.7, 35.0, 31.0, 20.6. **HRMS** (ESI-TOF): Anal Calcd. For. C<sub>20</sub>H<sub>24</sub>BrNO<sub>5</sub>S<sub>2</sub>+H<sup>+</sup>: 502.0353, found: 502.0354. **IR** (neat, cm<sup>-1</sup>): ν 3087, 2963, 2905, 2870, 1741, 1227, 997, 877, 789, 633.

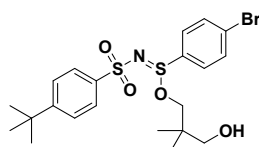

### 6w

petroleum ether / ethyl acetate = 15:1 – 3:1, a colorless solid, 62% yield (62.1 mg). mp: 143 – 145 °C. **<sup>1</sup>H NMR** (400 MHz, Chloroform-*d*) δ 7.88 – 7.85 (m, 2H), 7.72 – 7.65 (m, 4H), 7.50 – 7.47 (m, 2H), 4.00 (d, *J* = 9.1 Hz, 1H), 3.42 (d, *J* = 11.2 Hz, 1H), 3.21 (d, *J* = 11.2 Hz, 1H), 3.01 (d, *J* = 9.1 Hz, 1H), 2.62 (s, 1H), 1.32 (s, 9H), 0.79 (d, *J* = 2.0 Hz, 6H). **<sup>13</sup>C NMR** (100 MHz, Chloroform-*d*) δ 155.9, 139.5, 134.2, 133.0, 128.9, 128.5, 126.3, 125.9, 68.5, 66.9, 36.6, 35.1, 31.1, 21.25, 21.21. **HRMS** (ESI-TOF): Anal Calcd. For. C<sub>21</sub>H<sub>28</sub>BrNO<sub>4</sub>S<sub>2</sub>+Na<sup>+</sup>: 526.0515, found: 526.0515. **IR** (neat, cm<sup>-1</sup>): ν 2962, 2925, 2902, 2876, 1287, 1149, 1033, 1004, 917, 829, 803, 740, 697, 638.

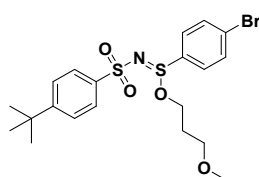

#### 6x

petroleum ether / ethyl acetate = 15:1 – 5:1, a viscous waxy oil, 79% yield (77.0 mg). **<sup>1</sup>H NMR** (400 MHz, Chloroform-*d*) δ 7.87 – 7.83 (m, 2H), 7.68 – 7.62 (m, 4H), 7.47 – 7.44 (m, 2H), 4.00 (dt, *J* = 9.8, 6.2 Hz, 1H), 3.55 (dt, *J* = 9.8, 6.5 Hz, 1H), 3.28 – 3.22 (m, 2H), 3.20 (s, 3H), 1.69 – 1.63 (m, 2H), 1.29 (s, 9H). **<sup>13</sup>C NMR** (100 MHz, Chloroform-*d*) δ 155.6, 140.1, 134.5, 132.7, 128.8, 128.3, 126.1, 125.7, 68.2, 62.9, 58.5, 34.9, 31.0, 29.1. **HRMS** (ESI-TOF): Anal Calcd. For. C<sub>20</sub>H<sub>26</sub>BrNO<sub>4</sub>S<sub>2</sub>+H<sup>+</sup>: 490.0539, found: 490.0538. **IR** (neat, cm<sup>-1</sup>): ν 2962, 2870, 1471, 1152, 1109, 1023, 999, 782, 632.

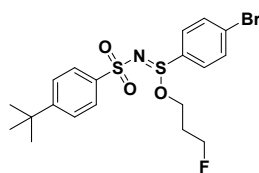

#### 6y

petroleum ether / ethyl acetate = 15:1 – 5:1, a viscous waxy oil, 83% yield (78.9 mg). **<sup>1</sup>H NMR** (400 MHz, Chloroform-*d*) δ 7.88 – 7.84 (m, 2H), 7.70 – 7.65 (m, 4H), 7.49 – 7.46 (m, 2H), 4.42 – 4.33 (m, 1H), 4.31 – 4.21 (m, 1H), 4.05 (dt, *J* = 10.0, 6.0 Hz, 1H), 3.56 (dt, *J* = 10.0, 6.3 Hz, 1H), 1.85 – 1.79 (m, 1H), 1.79 – 1.72 (m, 1H), 1.30 (s, 9H). **<sup>13</sup>C NMR** (100 MHz, Chloroform-*d*) δ 155.8, 140.0, 134.2, 132.9, 128.8, 128.5, 126.1, 125.8, 79.7 (d, *J* = 166.1 Hz), 61.1 (d, *J* = 5.0 Hz), 35.0, 31.0, 29.9 (d, *J* = 20.0 Hz).

**<sup>19</sup>F NMR** (376 MHz, Chloroform-*d*)  $\delta$  18.96 (m, 1F). **HRMS** (ESI-TOF): Anal Calcd. For. C<sub>19</sub>H<sub>23</sub>BrFNO<sub>3</sub>S<sub>2</sub>+H<sup>+</sup>: 478.0340, found: 478.0334. **IR** (neat, cm<sup>-1</sup>):  $\nu$  3086, 2964, 2906, 2869, 1306, 1021, 997, 911, 782, 633.

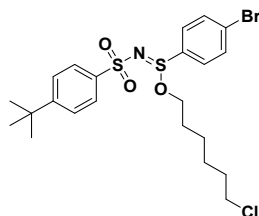

### 6z

petroleum ether / ethyl acetate = 15:1 – 5:1, a viscous waxy oil, 83% yield (88.5 mg). **<sup>1</sup>H NMR** (400 MHz, Chloroform-*d*)  $\delta$  7.87 – 7.84 (m, 2H), 7.69 – 7.64 (m, 4H), 7.48 – 7.45 (m, 2H), 3.94 (dt, *J* = 9.7, 6.5 Hz, 1H), 3.48 – 3.42 (m, 3H), 1.71 – 1.64 (m, 2H), 1.48 – 1.41 (m, 2H), 1.36 – 1.28 (m, 11H), 1.24 – 1.18 (m, 2H). **<sup>13</sup>C NMR** (100 MHz, Chloroform-*d*)  $\delta$  155.6, 140.2, 134.6, 132.8, 128.8, 128.3, 126.1, 125.7, 65.4, 44.7, 34.9, 32.1, 31.0, 28.7, 26.1, 24.7. **HRMS** (ESI-TOF): Anal Calcd. For. C<sub>22</sub>H<sub>29</sub>BrClNO<sub>3</sub>S<sub>2</sub>+Na<sup>+</sup>: 558.0333, found: 558.0329. **IR** (neat, cm<sup>-1</sup>):  $\nu$  2959, 2867, 1288, 1152, 1022, 998, 793, 731, 633.

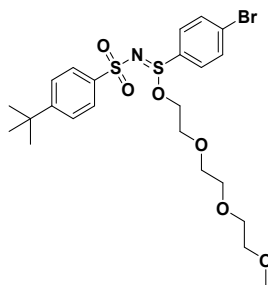

### 6aa

petroleum ether / ethyl acetate = 15:1 – 2:1, a yellow oil, 73% yield (81.9 mg). **<sup>1</sup>H NMR** (400 MHz, Chloroform-*d*)  $\delta$  7.86 – 7.83 (m, 2H), 7.73 – 7.69 (m, 2H), 7.67 – 7.63 (m, 2H), 7.47 – 7.44 (m, 2H), 4.15 – 4.10 (m, 1H), 3.74 – 3.69 (m, 1H), 3.59 – 3.48 (m, 10H), 3.32 (s, 3H), 1.29 (s, 9H). **<sup>13</sup>C NMR** (100 MHz, Chloroform-*d*)  $\delta$  155.6, 140.0, 134.7, 132.7, 129.1, 128.3, 126.1, 125.7, 71.7, 70.41, 70.37, 70.36, 68.8, 65.5, 58.9, 34.9, 31.0. **HRMS** (ESI-TOF): Anal Calcd. For. C<sub>23</sub>H<sub>32</sub>BrNO<sub>6</sub>S<sub>2</sub>+Na<sup>+</sup>: 584.0747, found: 584.0739. **IR** (neat, cm<sup>-1</sup>):  $\nu$  3246, 3089, 2960, 2872, 1333, 1164, 1109, 1089, 1002, 834, 630.

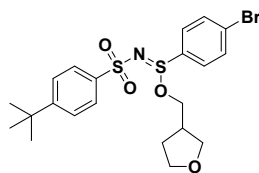

### 6ab

petroleum ether / ethyl acetate = 15:1 – 7:1, a viscous waxy oil, 78% yield (77.9 mg). **<sup>1</sup>H NMR** (400 MHz, Chloroform-*d*)  $\delta$  7.89 – 7.85 (m, 2H), 7.74 – 7.64 (m, 4H), 7.49 – 7.45 (m, 2H), 3.96 – 3.29 (m, 5H), 1.86 – 1.34 (m, 4H), 1.31 (s, 9H). **<sup>13</sup>C NMR** (100 MHz, Chloroform-*d*)  $\delta$  155.7, 155.6, 140.12, 140.06, 134.8, 134.4, 132.8, 132.7, 129.04, 129.00, 128.4, 128.3, 126.2, 126.1, 125.8, 76.4, 76.2, 68.4, 68.32, 68.26, 66.6, 35.0, 31.0, 27.7, 27.4, 25.6, 25.3. **HRMS** (ESI-TOF): Anal Calcd. For. C<sub>21</sub>H<sub>26</sub>BrNO<sub>6</sub>S<sub>2</sub>+Na<sup>+</sup>: 524.0359, found: 524.0358. **IR** (neat, cm<sup>-1</sup>):  $\nu$  3082, 2970, 2902, 1318, 1157, 1084, 1021, 1000, 918, 793, 728, 632.

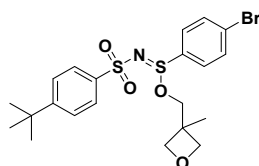

### 6ac

petroleum ether / ethyl acetate = 15:1 – 7:1, a colorless solid, 70% yield (69.9 mg). mp: 128 – 130 °C. **<sup>1</sup>H NMR** (400 MHz, Chloroform-*d*)  $\delta$  7.89 – 7.86 (m, 2H), 7.73 – 7.68 (m, 4H), 7.50 – 7.46 (m, 2H), 4.23 – 4.17 (m, 4H), 3.99 (d, *J* = 9.5 Hz, 1H), 3.41 (d, *J* = 9.5 Hz, 1H), 1.30 (s, 9H), 1.14 (s, 3H). **<sup>13</sup>C NMR** (100 MHz, Chloroform-*d*)  $\delta$  155.9, 140.0, 134.2, 133.0, 128.8, 128.7, 126.2, 125.9, 78.9, 68.5, 39.0, 35.0, 31.0, 20.7. **HRMS** (ESI-TOF): Anal Calcd. For. C<sub>21</sub>H<sub>26</sub>BrNO<sub>4</sub>S<sub>2</sub>+H<sup>+</sup>: 500.0560, found: 500.0560. **IR** (neat, cm<sup>-1</sup>):  $\nu$  2967, 2868, 1317, 1157, 998, 909, 799, 740, 631.

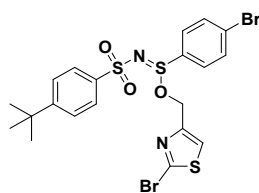

### 6ad



petroleum ether / ethyl acetate = 15:1 – 5:1, a yellow solid, 60% yield (70.8 mg). mp: 131 – 133 °C. <sup>1</sup>H NMR (400 MHz, Chloroform-*d*) δ 7.88 – 7.85 (m, 2H), 7.72 – 7.64 (m, 4H), 7.48 – 7.45 (m, 2H), 7.16 (s, 1H), 5.02 (d, *J* = 12.3 Hz, 1H), 4.66 (d, *J* = 12.1 Hz, 1H), 1.30 (s, 9H). <sup>13</sup>C NMR (100 MHz, Chloroform-*d*) δ 155.8, 149.8, 139.7, 136.7, 134.2, 132.8, 129.0, 128.7, 126.2, 125.9, 123.5, 61.6, 35.0, 31.0. HRMS (ESI-TOF): Anal Calcd. For. C<sub>20</sub>H<sub>20</sub>Br<sub>2</sub>N<sub>2</sub>O<sub>3</sub>S<sub>3</sub>+H<sup>+</sup>: 590.9076, found: 590.9076. IR (neat, cm<sup>-1</sup>): ν 2968, 2902, 1719, 1386, 1312, 1146, 1002, 791, 733, 640.

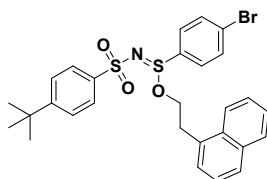

#### 6ae

petroleum ether / ethyl acetate = 15:1 – 5:1, a viscous waxy oil, 84% yield (95.6 mg). <sup>1</sup>H NMR (400 MHz, Chloroform-*d*) δ 7.94 – 7.90 (m, 2H), 7.85 – 7.82 (m, 1H), 7.75 – 7.73 (m, 1H), 7.68 – 7.66 (m, 1H), 7.51 – 7.48 (m, 2H), 7.47 – 7.41 (m, 2H), 7.40 – 7.37 (m, 2H), 7.35 – 7.29 (m, 3H), 7.19 – 7.17 (m, 1H), 4.22 (dt, *J* = 9.9, 6.5 Hz, 1H), 3.81 (dt, *J* = 9.9, 7.3 Hz, 1H), 3.26 – 3.15 (m, 2H), 1.30 (s, 9H). <sup>13</sup>C NMR (100 MHz, Chloroform-*d*) δ 155.7, 140.1, 134.0, 133.7, 132.4, 132.3, 131.5, 128.8, 128.6, 128.1, 127.6, 127.4, 126.20, 126.18, 125.8, 125.7, 125.3, 123.0, 65.2, 34.9, 32.4, 31.0. HRMS (ESI-TOF): Anal Calcd. For. C<sub>28</sub>H<sub>28</sub>BrNO<sub>3</sub>S<sub>2</sub>+H<sup>+</sup>: 572.0747, found: 572.0746. IR (neat, cm<sup>-1</sup>): ν 3087, 2966, 2906, 2872, 1720, 1312, 1149, 1000, 730, 635.

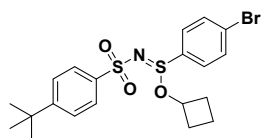

#### 6af

petroleum ether / ethyl acetate = 15:1 – 5:1, a viscous waxy oil, 61% yield (57.2 mg). <sup>1</sup>H NMR (400 MHz, Chloroform-*d*) δ 7.87 – 7.83 (m, 2H), 7.69 – 7.64 (m, 4H), 7.48 – 7.45 (m, 2H), 4.67 – 4.59 (m, 1H), 2.05 – 1.86 (m, 3H), 1.83 – 1.75 (m, 1H), 1.67 – 1.58 (m, 1H), 1.41 – 1.34 (m, 1H), 1.30 (s, 9H). <sup>13</sup>C NMR (100 MHz, Chloroform-*d*) δ 155.6, 140.2, 135.5, 132.7, 128.8, 128.2, 126.2, 125.7, 71.0, 35.0,

31.72, 31.69, 31.1, 13.1. **HRMS** (ESI-TOF): Anal Calcd. For.  $C_{20}H_{24}BrNO_3S_2+H^+$ : 470.0454, found: 470.0456. **IR** (neat,  $cm^{-1}$ ):  $\nu$  3086, 2961, 2905, 2869, 1306, 1019, 996, 782, 726, 633.

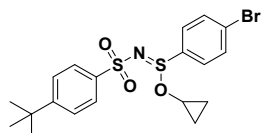

### 6ag

petroleum ether / ethyl acetate = 15:1 – 5:1, a viscous waxy oil, 78% yield (71.0 mg).  **$^1H$  NMR** (400 MHz, Chloroform-*d*)  $\delta$  7.88 – 7.85 (m, 2H), 7.69 – 7.64 (m, 4H), 7.48 – 7.45 (m, 2H), 3.83 – 3.79 (m, 1H), 1.30 (s, 9H), 0.77 – 0.72 (m, 1H), 0.69 – 0.61 (m, 2H), 0.56 – 0.51 (m, 1H).  **$^{13}C$  NMR** (100 MHz, Chloroform-*d*)  $\delta$  155.7, 140.0, 135.1, 132.7, 128.7, 128.3, 126.2, 125.7, 52.1, 35.0, 31.0, 6.2, 6.0. **HRMS** (ESI-TOF): Anal Calcd. For.  $C_{19}H_{22}BrNO_3S_2+Na^+$ : 478.0117, found: 478.0116. **IR** (neat,  $cm^{-1}$ ):  $\nu$  3086, 2963, 2904, 2869, 1305, 1152, 1021, 999, 787, 633.

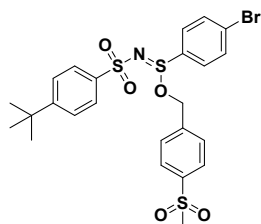

### 6ah

petroleum ether / ethyl acetate = 15:1 – 2:1, a colorless solid, 83% yield (96.8 mg). mp: 139 – 141 °C.  **$^1H$  NMR** (400 MHz, Chloroform-*d*)  $\delta$  7.88 – 7.84 (m, 4H), 7.72 – 7.67 (m, 4H), 7.49 – 7.45 (m, 2H), 7.35 – 7.33 (m, 2H), 5.04 (d,  $J = 11.8$  Hz, 1H), 4.53 (d,  $J = 11.8$  Hz, 1H), 3.02 (s, 3H), 1.29 (s, 9H).  **$^{13}C$  NMR** (100 MHz, Chloroform-*d*)  $\delta$  156.0, 140.8, 140.0, 139.7, 134.1, 133.0, 129.2, 128.8, 127.6, 126.2, 125.9, 64.9, 44.3, 35.0, 31.0. **HRMS** (ESI-TOF): Anal Calcd. For.  $C_{24}H_{26}BrNO_5S_3+H^+$ : 586.0209, found: 586.0213. **IR** (neat,  $cm^{-1}$ ):  $\nu$  2967, 2903, 1720, 1312, 1148, 1000, 730, 635.

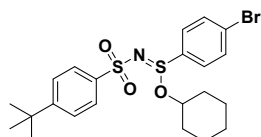

### 6ai

petroleum ether / ethyl acetate = 15:1 – 8:1, a yellow solid, 80% yield (79.5 mg). mp: 79 – 81 °C. **<sup>1</sup>H NMR** (400 MHz, Chloroform-*d*) δ 7.88 – 7.84 (m, 2H), 7.67 – 7.63 (m, 4H), 7.48 – 7.44 (m, 2H), 4.36 – 4.30 (m, 1H), 1.88 – 1.84 (m, 1H), 1.65 – 1.49 (m, 3H), 1.47 – 1.38 (m, 2H), 1.30 (s, 9H), 1.28 – 1.24 (m, 2H), 1.19 – 1.13 (m, 2H). **<sup>13</sup>C NMR** (100 MHz, Chloroform-*d*) δ 155.5, 140.4, 136.3, 132.6, 128.6, 127.9, 126.1, 125.7, 80.0, 35.0, 32.83, 32.78, 31.0, 24.8, 23.6, 23.5. **HRMS** (ESI-TOF): Anal Calcd. For. C<sub>22</sub>H<sub>28</sub>BrNO<sub>3</sub>S<sub>2</sub>+Na<sup>+</sup>: 520.0587, found: 520.0583. **IR** (neat, cm<sup>-1</sup>): ν 3089, 2930, 2856, 1318, 1152, 990, 918, 752, 738, 626.

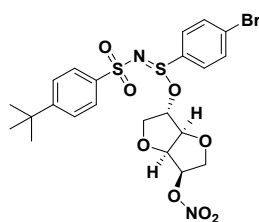

### 6aj

petroleum ether / ethyl acetate = 15:1 – 3:1, a viscous waxy oil, 67% yield (78.8 mg). **<sup>1</sup>H NMR** (400 MHz, Chloroform-*d*) δ 7.88 – 7.83 (m, 2H), 7.69 – 7.68 (m, 4H), 7.51 – 7.47 (m, 2H), 5.29 – 5.24 (m, 1H), 4.90 – 4.80 (m, 2H), 4.32 (dd, *J* = 78.4, 4.9 Hz, 1H), 3.90 (dt, *J* = 11.4, 2.8 Hz, 1H), 3.82 – 3.76 (m, 2H), 3.70 – 3.56 (m, 1H), δ 1.31 (d, *J* = 1.3 Hz, 1H). **<sup>13</sup>C NMR** (100 MHz, Chloroform-*d*) δ 156.2, 156.1, 139.475, 139.466, 134.7, 134.4, 133.1, 133.0, 129.1, 128.9, 128.72, 128.66, 126.3, 126.2, 126.0, 125.9, 86.7, 86.6, 81.41, 81.38, 81.0, 80.9, 80.5, 79.2, 73.34, 73.29, 69.18, 69.16, 35.0, 31.03, 30.98. **HRMS** (ESI-TOF): Anal Calcd. For. C<sub>22</sub>H<sub>25</sub>BrN<sub>2</sub>O<sub>8</sub>S<sub>2</sub>+Na<sup>+</sup>: 611.0128, found: 611.0124. **IR** (neat, cm<sup>-1</sup>): ν 3088, 2965, 2925, 2872, 1639, 1279, 1153, 1000, 849, 778, 730, 633.

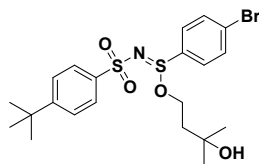

### 6ak

petroleum ether / ethyl acetate = 15:1 – 2:1, a yellow solid, 62% yield (62.1 mg). mp: 84 – 86 °C. **<sup>1</sup>H NMR** (400 MHz, Chloroform-*d*) δ 7.87 – 7.84 (m, 2H), 7.69 – 7.64 (m, 4H), 7.49 – 7.45 (m, 2H), 4.17 (dt, *J* = 10.0, 6.9 Hz, 1H), 3.64 (dt, *J* = 10.0, 6.8 Hz, 1H), 1.98 (s, 1H), 1.68 – 1.60 (m, 2H), 1.30 (s, 9H),

1.10 (d,  $J = 8.2$  Hz, 6H).  $^{13}\text{C}$  NMR (100 MHz, Chloroform- $d$ )  $\delta$  155.7, 140.0, 134.4, 132.8, 128.9, 128.4, 126.2, 125.8, 69.5, 62.6, 41.8, 35.0, 31.0, 29.6, 29.5. HRMS (ESI-TOF): Anal Calcd. For.  $\text{C}_{21}\text{H}_{28}\text{BrNO}_4\text{S}_2 + \text{Na}^+$ : 526.0515, found: 526.0512. IR (neat,  $\text{cm}^{-1}$ ):  $\nu$  3473, 3088, 2965, 2930, 2906, 2871, 1148, 1025, 1001, 730, 633.

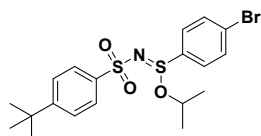

### 6al

petroleum ether / ethyl acetate = 15:1 – 7:1, a viscous waxy oil, 81% yield (74.0 mg).  $^1\text{H}$  NMR (400 MHz, Chloroform- $d$ )  $\delta$  7.86 – 7.83 (m, 2H), 7.67 – 7.62 (m, 4H), 7.47 – 7.44 (m, 2H), 4.72 – 4.62 (m, 1H), 1.29 – 1.28 (m, 12H), 1.11 (d,  $J = 6.3$  Hz, 3H).  $^{13}\text{C}$  NMR (100 MHz, Chloroform- $d$ )  $\delta$  155.5, 140.3, 136.0, 132.6, 128.6, 128.0, 126.1, 125.7, 75.3, 34.9, 31.0, 23.2, 23.1. HRMS (ESI-TOF): Anal Calcd. For.  $\text{C}_{19}\text{H}_{24}\text{BrNO}_3\text{S}_2 + \text{Na}^+$ : 482.0253, found: 482.0253. IR (neat,  $\text{cm}^{-1}$ ):  $\nu$  3086, 2965, 2819, 1304, 1151, 996, 832, 730, 633.

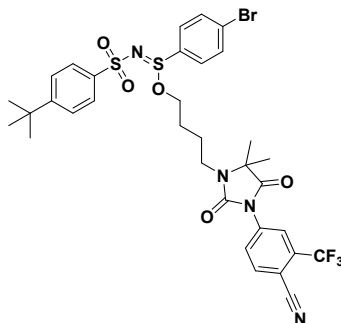

### 6am

petroleum ether / ethyl acetate = 5:1 – 1.5:1, a viscous waxy oil, 89% yield (136.4 mg).  $^1\text{H}$  NMR (400 MHz, Chloroform- $d$ )  $\delta$  8.13 (d,  $J = 2.1$  Hz, 1H), 8.00 – 7.97 (m, 1H), 7.89 – 7.86 (m, 1H), 7.82 – 7.79 (m, 2H), 7.67 – 7.62 (m, 4H), 7.47 – 7.44 (m, 2H), 4.13 (dt,  $J = 9.9, 5.9$  Hz, 1H), 3.59 (dt,  $J = 9.7, 5.7$  Hz, 1H), 3.34 (t,  $J = 7.2$  Hz, 2H), 1.76 – 1.65 (m, 4H), 1.51 (d,  $J = 3.9$  Hz, 6H), 1.29 (s, 9H).  $^{13}\text{C}$  NMR (100 MHz, Chloroform- $d$ )  $\delta$  174.5, 155.7, 152.8, 139.8, 136.4, 135.1, 134.3, 133.2 (q,  $J = 33.2$  Hz), 132.8, 128.7, 128.4, 127.9, 126.0, 125.7, 122.9 (q,  $J = 4.9$  Hz), 121.8 (q,  $J = 272.6$  Hz), 114.9, 107.9 (q,  $J = 1.9$  Hz), 64.7, 61.8, 39.5, 34.9, 30.9, 26.5, 25.6, 23.3, 23.2.  $^{19}\text{F}$  NMR (376 MHz, Chloroform- $d$ )  $\delta$  -61.93 (s,

3F). **HRMS** (ESI-TOF): Anal Calcd. For.  $C_{33}H_{34}BrF_3N_4O_5S_2+H^+$ : 767.1179, found: 767.1180. **IR** (neat,  $cm^{-1}$ ):  $\nu$  2966, 2908, 2872, 1719, 1409, 1312, 1141, 1000, 730, 635.

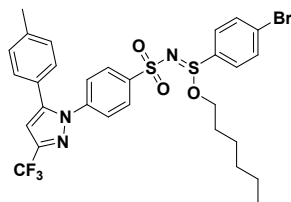

### 7a

petroleum ether / ethyl acetate = 15:1 – 6:1, a viscous waxy oil, 90% yield (120.1 mg).  **$^1H$  NMR** (400 MHz, Chloroform-*d*)  $\delta$  7.96 – 7.91 (m, 2H), 7.71 – 7.62 (m, 2H), 7.66 – 7.62 (m, 2H), 7.44 – 7.40 (m, 2H), 7.15 – 7.13 (m, 2H), 7.09 – 7.07 (m, 2H), 6.71 (s, 1H), 3.97 (dt,  $J = 9.6, 6.6$  Hz, 1H), 3.52 (dt,  $J = 9.6, 6.7$  Hz, 1H), 2.36 (s, 3H), 1.52 – 1.45 (m, 2H), 1.24 – 1.14 (m, 6H), 0.82 (t,  $J = 7.0$  Hz, 3H).  **$^{13}C$  NMR** (100 MHz, Chloroform-*d*)  $\delta$  145.1, 143.7 (q,  $J = 38.1$  Hz), 142.7, 141.8, 139.6, 134.3, 132.9, 129.6, 128.7, 128.6, 128.5, 127.3, 125.6, 125.2, 121.0 (q,  $J = 269.1$  Hz), 106.0 (q,  $J = 1.9$  Hz), 66.3, 31.0, 28.8, 25.1, 22.2, 21.2, 13.7.  **$^{19}F$  NMR** (376 MHz, Chloroform-*d*)  $\delta$  -62.36 (s, 3F). **HRMS** (ESI-TOF): Anal Calcd. For.  $C_{29}H_{29}BrF_3N_3O_3S_2+Na^+$ : 692.0658, found: 692.0659. **IR** (neat,  $cm^{-1}$ ):  $\nu$  2956, 2930, 2860, 1734, 1147, 1235, 1151, 1133, 1002, 973, 801, 632.

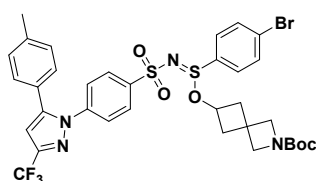

### 7b

petroleum ether / ethyl acetate = 10:1 – 2:1, a viscous waxy oil, 78% yield (121.4 mg).  **$^1H$  NMR** (400 MHz, Chloroform-*d*)  $\delta$  7.91 – 7.88 (m, 2H), 7.70 – 7.67 (m, 2H), 7.62 – 7.59 (m, 2H), 7.44 – 7.40 (m, 2H), 7.16 – 7.14 (m, 2H), 7.10 – 7.07 (m, 2H), 6.72 (s, 1H), 4.66 – 4.59 (m, 1H), 3.83 – 3.76 (m, 4H), 2.52 – 2.46 (m, 1H), 2.36 (s, 3H), 2.29 – 2.19 (m, 2H), 2.16 – 2.11 (m, 1H), 1.39 (s, 9H).  **$^{13}C$  NMR** (100 MHz, Chloroform-*d*)  $\delta$  155.9, 145.1, 143.9 (q,  $J = 37.5$  Hz), 142.4, 142.0, 139.7, 134.6, 133.0, 129.7, 128.8, 128.64, 128.63, 127.4, 125.6, 125.3, 121.0 (q,  $J = 267.5$  Hz), 106.1 (q,  $J = 1.6$  Hz), 79.5, 67.0, 42.2, 41.9, 30.9, 28.2, 21.3.  **$^{19}F$  NMR** (376 MHz, Chloroform-*d*)  $\delta$  -62.39 (s, 3F). **HRMS** (ESI-TOF):

Anal Calcd. For.  $C_{33}H_{34}BrF_3N_4O_5S_2+Na^+$ : 801.0999, found: 801.0987 **IR** (neat,  $cm^{-1}$ ):  $\nu$  2977, 2934, 2874, 1694, 1271, 1152, 1134, 975, 729.

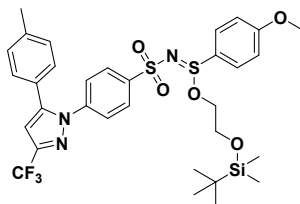

### 7c

petroleum ether / ethyl acetate = 10:1 – 3:1, a viscous waxy oil, 68% yield (94.3 mg).  **$^1H$  NMR** (400 MHz, Chloroform-*d*)  $\delta$  7.96 – 7.92 (m, 2H), 7.74 – 7.70 (m, 2H), 7.42 – 7.39 (m, 2H), 7.15 – 7.13 (m, 2H), 7.09 – 7.07 (m, 2H), 7.03 – 6.99 (m, 2H), 6.72 (s, 1H), 4.05 – 4.00 (m, 1H), 3.86 (s, 3H), 3.70 – 3.61 (m, 3H), 2.36 (s, 3H), 0.84 (s, 9H), 0.02 (s, 3H), 0.00 (s, 3H).  **$^{13}C$  NMR** (100 MHz, Chloroform-*d*)  $\delta$  163.6, 145.1, 143.8 (q,  $J = 38.2$  Hz), 143.0, 141.7, 139.6, 129.6, 129.4, 128.6, 127.4, 126.0, 125.7, 125.3, 121.1 (q,  $J = 267.4$  Hz), 115.0, 106.0 (q,  $J = 1.8$  Hz), 67.0, 61.3, 55.7, 25.7, 21.2, 18.2, -5.4, -5.5.  **$^{19}F$  NMR** (376 MHz, Chloroform-*d*)  $\delta$  -62.38 (s, 3F). **HRMS** (ESI-TOF): Anal Calcd. For.  $C_{32}H_{38}F_3N_3O_5S_2Si+Na^+$ : 716.1867, found: 716.1866. **IR** (neat,  $cm^{-1}$ ):  $\nu$  2954, 2930, 2901, 2858, 1593, 1496, 1471, 1260, 1236, 1151, 1133, 1086, 829, 802.

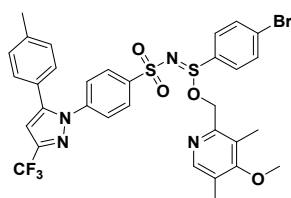

### 7d

petroleum ether / ethyl acetate = 10:1 – 2:1, a viscous waxy oil, 75% yield (109.8 mg).  **$^1H$  NMR** (400 MHz, Chloroform-*d*)  $\delta$  8.15 (s, 1H), 7.98 – 7.94 (m, 2H), 7.74 – 7.71 (m, 2H), 7.68 – 7.65 (m, 2H), 7.43 – 7.40 (m, 2H), 7.14 – 7.12 (m, 2H), 7.09 – 7.07 (m, 2H), 6.72 (s, 1H), 5.17 (d,  $J = 11.1$  Hz, 1H), 4.69 (d,  $J = 11.1$  Hz, 1H), 3.74 (s, 3H), 2.36 (s, 3H), 2.23 (s, 3H), 2.15 (s, 3H).  **$^{13}C$  NMR** (100 MHz, Chloroform-*d*)  $\delta$  164.4, 151.0, 149.3, 145.2, 143.9 (q,  $J = 38.1$  Hz), 142.6, 142.0, 139.7, 134.2, 132.9, 129.7, 129.1, 128.8, 128.7, 127.5, 127.2, 126.7, 125.7, 125.4, 121.1 (q,  $J = 267.4$  Hz), 106.1 (q,  $J = 1.6$  Hz), 66.9, 60.0, 21.3, 13.3, 10.7.  **$^{19}F$  NMR** (376 MHz, Chloroform-*d*)  $\delta$  -62.40 (s, 3F). **HRMS** (ESI-

TOF): Anal Calcd. For.  $C_{32}H_{28}BrF_3N_4O_4S_2+H^+$ : 733.0761, found: 733.0758. **IR** (neat,  $cm^{-1}$ ):  $\nu$  3061, 2925, 1471, 1235, 1158, 1132, 1094, 974, 727.

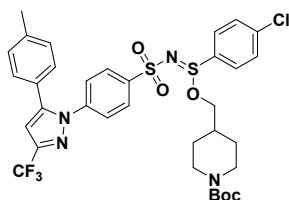

### 7e

petroleum ether / ethyl acetate = 10:1 – 2:1, a viscous waxy oil, 97% yield (142.8 mg). **<sup>1</sup>H NMR** (400 MHz, Chloroform-*d*)  $\delta$  7.94 – 7.91 (m, 2H), 7.71 – 7.67 (m, 2H), 7.55 – 7.51 (m, 2H), 7.43 – 7.40 (m, 2H), 7.15 – 7.13 (m, 2H), 7.09 – 7.06 (m, 2H), 6.71 (s, 1H), 4.05 (s, 2H), 3.88 – 3.84 (m, 1H), 3.28 (t,  $J$  = 8.0 Hz, 1H), 2.72 – 2.52 (t,  $J$  = 13.1 Hz, 2H), 2.35 (s, 3H), 1.66 – 1.47 (m, 3H), 1.41 (s, 9H), 1.07 – 0.95 (m, 2H). **<sup>13</sup>C NMR** (100 MHz, Chloroform-*d*)  $\delta$  154.6, 145.1, 143.9 (q,  $J$  = 38.6 Hz), 142.6, 142.0, 140.3, 139.6, 133.4, 130.1, 129.6, 128.6, 127.4, 125.6, 125.4, 121.0 (q,  $J$  = 267.6 Hz), 106.0 (q,  $J$  = 1.4 Hz), 79.4, 69.2, 35.8, 28.4, 28.3, 28.2, 21.2. **<sup>19</sup>F NMR** (376 MHz, Chloroform-*d*)  $\delta$  -62.40 (s, 3F). **HRMS** (ESI-TOF): Anal Calcd. For.  $C_{34}H_{36}BrF_3N_4O_3S_2+Na^+$ : 761.1631, found: 761.1613. **IR** (neat,  $cm^{-1}$ ):  $\nu$  2976, 2932, 2859, 1683, 1235, 1150, 1005, 971, 908, 728.

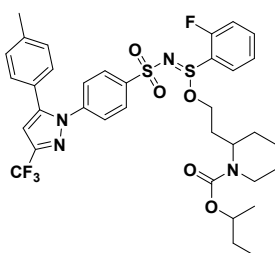

### 7f

petroleum ether / ethyl acetate = 10:1 – 2:1, a viscous waxy oil, 92% yield (135.1 mg). **<sup>1</sup>H NMR** (400 MHz, Chloroform-*d*)  $\delta$  8.05 – 8.01 (m, 1H), 7.94 – 7.90 (m, 2H), 7.65 – 7.60 (m, 1H), 7.42 – 7.39 (m, 2H), 7.35 – 7.31 (m, 1H), 7.24 – 7.19 (m, 1H), 7.15 – 7.13 (m, 2H), 7.08 – 7.06 (m, 2H), 6.71 (s, 1H), 4.67 – 4.60 (m, 1H), 4.24 – 4.20 (m, 1H), 4.14 – 4.01 (m, 1H), 3.94 – 3.91 (m, 1H), 3.69 – 3.59 (m, 1H), 2.66 – 2.60 (m, 1H), 2.35 (s, 3H), 2.03 – 1.94 (m, 1H), 1.67 – 1.29 (m, 9H), 1.13 – 1.08 (m, 3H), 0.84 – 0.80 (m, 3H). **<sup>13</sup>C NMR** (100 MHz, Chloroform-*d*)  $\delta$  161.2 (d,  $J$  = 3.9 Hz), 158.6 (d,  $J$  = 4.2 Hz), 155.3, 145.1, 143.8 (q,  $J$  = 38.3 Hz), 142.7, 141.9, 139.6, 135.9 (d,  $J$  = 8.2 Hz), 129.6, 128.6, 128.0 (d,  $J$  = 1.9

Hz), 128.0, 127.4, 125.6, 125.3, 125.2, 123.1 (d,  $J = 12.4$  Hz), 121.0 (q,  $J = 267.4$  Hz), 116.7 (d,  $J = 19.8$  Hz), 106.0 (q,  $J = 1.7$  Hz), 72.95, 72.92, 72.89, 72.85, 65.5, 64.9, 47.48, 47.45, 47.4, 38.89, 38.86, 38.82, 38.79, 38.77, 29.71, 29.68, 29.65, 29.6, 28.91, 28.88, 28.86, 28.6, 28.5, 28.4, 28.3, 25.21, 25.19, 25.17, 21.2, 19.61, 19.56, 18.8, 9.61, 9.59, 9.55.  **$^{19}\text{F}$  NMR** (376 MHz, Chloroform-*d*)  $\delta$  -62.43 (s, 3F), -111.38 – -111.51(m, 1F). **HRMS** (ESI-TOF): Anal Calcd. For.  $\text{C}_{35}\text{H}_{38}\text{F}_4\text{N}_4\text{O}_5\text{S}_2+\text{Na}^+$ : 757.2112, found: 757.2093. **IR** (neat,  $\text{cm}^{-1}$ ):  $\nu$  3101, 3068, 2975, 2939, 1720, 1313, 1145, 1090, 1005, 729.

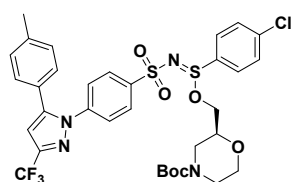

### 7g

petroleum ether / ethyl acetate = 10:1 – 2:1, a viscous waxy oil, 88% yield (130.0 mg).  **$^1\text{H}$  NMR** (400 MHz, Chloroform-*d*)  $\delta$  7.95 – 7.92 (m, 2H), 7.76 – 7.71 (m, 2H), 7.54 – 7.50 (m, 2H), 7.44 – 7.40 (m, 2H), 7.15 – 7.13 (m, 2H), 7.08 – 7.06 (m, 2H), 6.71 (s, 1H), 4.02 (s, 1H), 3.80 – 3.74 (m, 3H), 3.58 – 3.38 (m, 3H), 2.90 – 2.79 (m, 1H), 2.70 – 2.40 (m, 1H), 2.35 (s, 3H), 1.423 – 1.417 (m, 9H).  **$^{13}\text{C}$  NMR** (100 MHz, Chloroform-*d*)  $\delta$  154.48, 154.47, 145.2, 143.9 (q,  $J = 38.1, 37.6$  Hz), 142.50, 142.47, 142.11, 142.08, 140.46, 140.44, 139.7, 133.53, 133.45, 130.11, 130.09, 129.7, 128.87, 128.6, 128.7, 127.52, 127.51, 125.7, 125.53, 125.49, 121.1 (q,  $J = 268.7$  Hz), 106.1 (q,  $J = 1.3$  Hz), 80.4, 73.0, 72.9, 66.35, 66.32, 66.29, 28.3, 21.3.  **$^{19}\text{F}$  NMR** (376 MHz, Chloroform-*d*)  $\delta$  -62.38 – -62.39 (m, 3F). **HRMS** (ESI-TOF): Anal Calcd. For.  $\text{C}_{33}\text{H}_{34}\text{BrF}_3\text{N}_4\text{O}_6\text{S}_2+\text{H}^+$ : 739.1634, found: 739.1621. **IR** (neat,  $\text{cm}^{-1}$ ):  $\nu$  3091, 3070, 2976, 2928, 2867, 1692, 1410, 1236, 1151, 1133, 1005, 728.

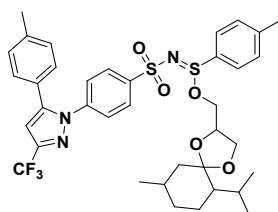

### 7h

petroleum ether / ethyl acetate = 10:1 – 3:1, a viscous waxy oil, 97% yield (141.5 mg).  **$^1\text{H}$  NMR** (400 MHz, Chloroform-*d*)  $\delta$  7.96 – 7.92 (m, 2H), 7.70 – 7.65 (m, 2H), 7.42 – 7.40 (m, 2H), 7.36 – 7.33 (m,



2H), 7.15 – 7.13 (m, 2H), 7.09 – 7.07 (m, 2H), 6.71 (s, 1H), 4.23 – 3.89 (m, 3H), 3.69 – 3.37 (m, 2H), 2.42 (s, 3H), 2.36 (s, 3H), 2.07 – 1.48 (m, 5H), 1.32 – 1.24 (m, 2H), 0.91 – 0.60 (m, 11H). <sup>13</sup>C NMR (100 MHz, Chloroform-*d*) δ 145.1, 144.8, 144.74, 144.71, 144.67, 144.6, 143.8 (q, *J* = 38.6 Hz), 142.72, 142.69, 142.67, 142.65, 142.59, 141.9, 141.84, 141.82, 139.6, 131.9, 131.8, 131.7, 131.6, 131.5, 131.3, 130.4 (q, *J* = 2.1 Hz), 129.6, 128.6, 127.41, 127.364, 127.358, 127.32, 127.26, 127.2, 125.64, 125.61, 125.29, 125.26, 125.2, 121.0 (q, *J* = 268.9 Hz), 113.68, 113.65, 113.45, 113.36, 113.33, 113.29, 113.22, 113.16, 106.0 (q, *J* = 1.9 Hz), 74.14, 74.12, 73.9, 73.8, 72.7, 72.6, 72.3, 72.2, 66.5, 66.14, 66.06, 65.9, 65.8, 65.7, 65.43, 65.38, 65.3, 65.1, 64.3, 64.1, 49.58, 49.56, 49.2, 49.1, 48.4, 48.3, 48.1, 47.9, 46.19, 46.18, 45.6, 45.4, 43.55, 43.52, 43.4, 34.4, 34.33, 34.29, 34.18, 34.16, 30.6, 30.5, 30.29, 30.27, 30.22, 30.16, 30.1, 30.0, 24.8, 24.7, 24.4, 24.31, 24.28, 24.25, 24.04, 24.01, 23.49, 23.47, 23.38, 23.34, 23.28, 23.26, 23.20, 23.19, 23.1, 23.01, 22.98, 22.9, 21.99, 22.96, 21.90, 21.86, 21.8, 21.5, 21.2, 18.8, 18.7, 18.33, 18.29, 18.04, 18.00, 17.84, 17.74. <sup>19</sup>F NMR (376 MHz, Chloroform-*d*) δ -62.38 – -62.39 (m, 3F). **HRMS** (ESI-TOF): Anal Calcd. For. C<sub>37</sub>H<sub>42</sub>F<sub>3</sub>N<sub>3</sub>O<sub>5</sub>S<sub>2</sub>+Na<sup>+</sup>: 752.2411, found: 752.2411. **IR** (neat, cm<sup>-1</sup>): ν 2952, 2928, 2870, 1498, 1236, 1152, 1135, 1007, 803, 730.

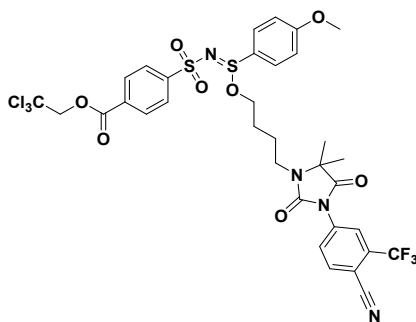

### 8a

petroleum ether / ethyl acetate = 5:1 – 1:1, a viscous waxy oil, 57% yield (95.3 mg). <sup>1</sup>H NMR (400 MHz, Chloroform-*d*) δ 8.20 – 8.17 (m, 2H), 8.14 – 8.13 (m, 1H), 8.04 – 7.98 (m, 3H), 7.90 – 7.87 (m, 1H), 7.72 – 7.68 (m, 2H), 7.03 – 6.99 (m, 2H), 4.95 (s, 2H), 4.11 (dt, *J* = 9.8, 5.9 Hz, 1H), 3.84 (s, 3H), 3.57 (dt, *J* = 9.7, 5.6 Hz, 1H), 3.34 (t, *J* = 7.2 Hz, 2H), 1.74 – 1.65 (m, 4H), 1.53 (s, 3H), 1.52 (s, 3H). <sup>13</sup>C NMR (100 MHz, Chloroform-*d*) δ 174.5, 163.8, 163.6, 152.8, 148.0, 136.4, 135.1, 133.3 (q, *J* = 33.3 Hz), 131.5, 130.5, 129.2, 127.9, 126.5, 125.5, 123.0 (q, *J* = 4.9 Hz), 121.9 (q, *J* = 274.3 Hz), 115.1, 115.0, 108.0 (q, *J* = 2.0 Hz), 94.6, 74.5, 64.1, 61.9, 55.7, 39.6, 26.6, 25.7, 23.33, 23.31. <sup>19</sup>F NMR (376 MHz, Chloroform-*d*) δ -61.96 (s, 3F). **HRMS** (ESI-TOF): Anal Calcd. For. C<sub>33</sub>H<sub>30</sub>Cl<sub>3</sub>F<sub>3</sub>N<sub>4</sub>O<sub>8</sub>S<sub>2</sub>+H<sup>+</sup>: 839.0566,

found: 839.0565. **IR** (neat,  $\text{cm}^{-1}$ ):  $\nu$  3096, 2987, 2940, 2255, 2233, 1720, 1410, 1313, 1142, 996, 834, 729.

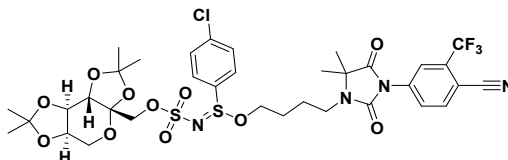

### 8b

petroleum ether / ethyl acetate = 5:1 – 1.5:1, a viscous waxy oil, 80% yield (135.7 mg).  **$^1\text{H}$  NMR** (400 MHz, Chloroform-*d*)  $\delta$  8.133 – 8.128 (m, 1H), 8.00 – 7.98 (m, 1H), 7.91 – 7.89 (m, 1H), 7.85 – 7.81 (m, 2H), 7.59 – 7.55 (m, 2H), 4.58 – 4.54 (m, 1H), 4.35 (t,  $J = 2.4$  Hz, 1H), 4.30 – 4.13 (m, 4H), 3.88 – 3.83 (m, 1H), 3.73 – 3.65 (m, 2H), 3.38 – 3.35 (m, 2H), 1.82 – 1.74 (m, 4H), 1.54 – 1.45 (m, 9H), 1.53 – 1.46 (m, 6H), 1.29 (d,  $J = 7.3$  Hz, 3H).  **$^{13}\text{C}$  NMR** (100 MHz, Chloroform-*d*)  $\delta$  174.55, 174.54, 152.9, 140.5, 140.4, 136.4, 135.2, 133.4 (q,  $J = 33.2$  Hz), 133.2 (q,  $J = 15.3$  Hz), 130.1, 128.9, 128.8, 127.9, 123.3, 123.2, 123.00 (q,  $J = 4.7$  Hz), 122.97 (q,  $J = 4.9$  Hz), 121.9 (q,  $J = 274.1$  Hz), , 115.0, 109.03, 108.99, 108.98, 108.1 (q,  $J = 2.0$  Hz), 100.92, 100.89, 70.5, 70.1, 70.0, 69.92, 69.88, 69.7, 69.6, 61.92, 61.91, 61.19, 61.16, 39.5, 26.7, 26.5, 26.4, 25.74, 25.67, 25.2, 23.93, 23.90, 23.35, 23.32.  **$^{19}\text{F}$  NMR** (376 MHz, Chloroform-*d*)  $\delta$  -61.99 (s, 3F). **HRMS** (ESI-TOF): Anal Calcd. For.  $\text{C}_{35}\text{H}_{40}\text{ClF}_3\text{N}_4\text{O}_{11}\text{S}_2 + \text{H}^+$ : 849.1849, found: 849.1840. **IR** (neat,  $\text{cm}^{-1}$ ):  $\nu$  2988, 2939, 2255, 2233, 1720, 1410, 1313, 1159, 1141, 1070, 1053, 995, 832, 729.

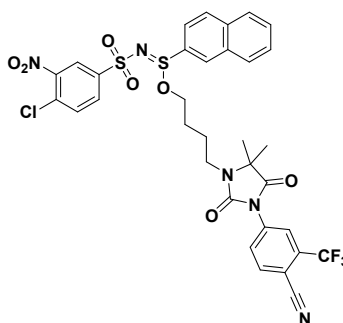

### 8c

petroleum ether / ethyl acetate = 5:1 – 1.5:1, a viscous waxy oil, 85% yield (129.4 mg).  **$^1\text{H}$  NMR** (400 MHz, Chloroform-*d*)  $\delta$  8.434 – 8.429 (m, 1H), 8.37 – 8.36 (m, 1H), 8.133 – 8.128 (m, 1H), 8.10 – 8.07 (m, 1H), 8.03 – 7.95 (m, 3H), 7.92 – 7.86 (m, 2H), 7.76 – 7.73 (m, 1H), 7.69 – 7.60 (m, 3H), 4.15 (dt,  $J$

= 9.8, 5.7 Hz, 1H), 3.64 – 3.58 (m, 1H), 3.33 (t,  $J = 6.9$  Hz, 2H), 1.75 – 1.66 (m, 4H), 1.52 (s, 6H), 1.51 (s, 6H).  $^{13}\text{C NMR}$  (100 MHz, Chloroform- $d$ )  $\delta$  174.5, 152.8, 147.5, 143.4, 136.4, 135.2, 135.1, 133.2 (q,  $J = 33.1$  Hz), 132.6, 132.3, 130.9, 130.5, 130.5, 130.2, 129.6, 129.1, 129.0, 128.05, 127.96, 127.9, 123.6, 122.9 (q,  $J = 4.9$  Hz), 121.9 (q,  $J = 272.6$  Hz), 121.5, 115.0, 107.9 (q,  $J = 2.1$  Hz), 65.2, 61.8, 39.5, 26.5, 25.6, 23.25, 23.23.  $^{19}\text{F NMR}$  (376 MHz, Chloroform- $d$ )  $\delta$  -61.91 (s, 3F). **HRMS** (ESI-TOF): Anal Calcd. For.  $\text{C}_{33}\text{H}_{27}\text{ClF}_3\text{N}_5\text{O}_7\text{S}_2+\text{H}^+$ : 762.1066, found: 762.1067. **IR** (neat,  $\text{cm}^{-1}$ ):  $\nu$  3094, 3064, 2978, 2941, 2887, 1719, 1409, 1312, 1138, 1009, 728.

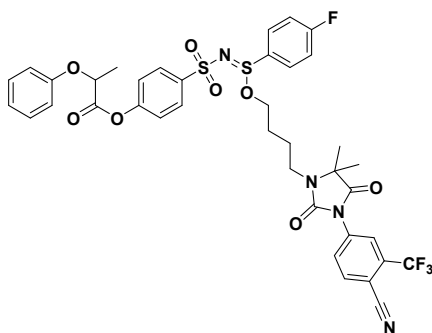

#### 8d

petroleum ether / ethyl acetate = 5:1 – 1:1, a viscous waxy oil, 55% yield (89.6 mg).  $^1\text{H NMR}$  (400 MHz, Chloroform- $d$ )  $\delta$  8.14 – 8.13 (m, 1H), 7.99 – 7.93 (m, 3H), 7.90 – 7.88 (m, 1H), 7.82 – 7.77 (m, 2H), 7.33 – 7.27 (m, 2H), 7.26 – 7.21 (m, 2H), 7.16 – 7.12 (m, 2H), 7.03 – 6.99 (m, 1H), 6.96 – 6.92 (m, 2H), 4.99 (q,  $J = 6.8$  Hz, 1H), 4.08 (dt,  $J = 9.7, 5.9$  Hz, 1H), 3.56 – 3.50 (m, 1H), 3.31 (t,  $J = 7.2$  Hz, 2H), 1.78 (d,  $J = 6.8$  Hz, 3H), 1.71 – 1.61 (m, 4H), 1.50 – 1.48 (m, 6H).  $^{13}\text{C NMR}$  (100 MHz, Chloroform- $d$ )  $\delta$  174.6, 170.4, 165.7 (d,  $J = 257.0$  Hz), 157.3, 152.9, 152.8, 141.0, 136.5, 135.2, 133.5 (q,  $J = 33.2$  Hz), 130.6 (d,  $J = 2.9$  Hz), 130.0 (d,  $J = 9.4$  Hz), 129.7, 128.1, 127.9, 126.4, 124.9, 124.1 (q,  $J = 163.8$  Hz), 123.0 (q,  $J = 4.8$  Hz), 122.9, 121.7, 117.2 (d,  $J = 22.9$  Hz), 115.1, 115.0, 108.1 (q,  $J = 2.1$  Hz), 72.4, 64.5, 61.9, 39.5, 26.5, 25.7, 23.30, 23.27, 18.5.  $^{19}\text{F NMR}$  (376 MHz, Chloroform- $d$ )  $\delta$  -61.99 (s, 3F), -103.59 (s, 1F). **HRMS** (ESI-TOF): Anal Calcd. For.  $\text{C}_{38}\text{H}_{34}\text{F}_4\text{N}_4\text{O}_8\text{S}_2+\text{H}^+$ : 815.1827, found: 815.1827. **IR** (neat,  $\text{cm}^{-1}$ ):  $\nu$  3101, 3068, 2923, 2852, 1719, 1409, 1313, 1145, 1004, 729.

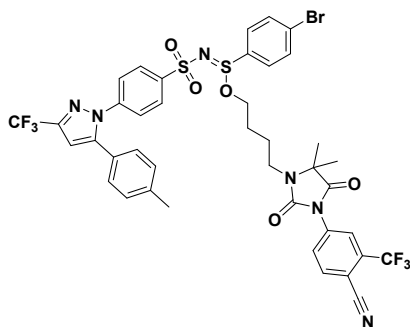

### 8e

petroleum ether / ethyl acetate = 5:1 – 1:1, a viscous waxy oil, 86% yield (160.7 mg). **<sup>1</sup>H NMR** (400 MHz, Chloroform-*d*)  $\delta$  8.134 – 8.129 (m, 1H), 7.99 – 7.97 (m, 1H), 7.93 – 7.87 (m, 3H), 7.71 – 7.67 (m, 2H), 7.64 – 7.60 (m, 2H), 7.44 – 7.41 (m, 2H), 7.15 – 7.13 (m, 2H), 7.08 – 7.06 (m, 2H), 6.71 (s, 1H), 4.11 (dt,  $J = 9.6, 5.8$  Hz, 1H), 3.57 (dt,  $J = 9.7, 5.6$  Hz, 1H), 3.33 (t,  $J = 7.1$  Hz, 2H), 2.36 (s, 3H), 1.72 – 1.62 (m, 4H), 1.52 (s, 3H), 1.51 (s, 3H). **<sup>13</sup>C NMR** (100 MHz, Chloroform-*d*)  $\delta$  174.5, 152.8, 145.2, 143.8 (q,  $J = 38.2$  Hz), 142.5, 142.0, 139.7, 136.4, 135.1, 133.9, 133.4 (q,  $J = 33.1$  Hz), 133.0, 129.6, 128.8, 128.7, 128.6, 127.9, 127.3, 125.5, 125.4, 123.0 (q,  $J = 5.0$  Hz), 121.9 (q,  $J = 272.6$  Hz), 121.0 (q,  $J = 267.5$  Hz), 115.0, 108.0 (q,  $J = 2.1$  Hz), 106.0 (q,  $J = 1.8$  Hz), 64.9, 61.9, 39.4, 26.5, 25.6, 23.3, 23.2, 21.2. **<sup>19</sup>F NMR** (376 MHz, Chloroform-*d*)  $\delta$  -61.96 (s, 3F), -62.31 (s, 3F). **HRMS** (ESI-TOF): Anal Calcd. For. C<sub>40</sub>H<sub>33</sub>BrF<sub>6</sub>N<sub>6</sub>O<sub>5</sub>S<sub>2</sub>+Na<sup>+</sup>: 957.0934, found: 957.0932. **IR** (neat, cm<sup>-1</sup>):  $\nu$  2979, 2941, 1720, 1409, 1313, 1236, 1133, 1002, 909, 728.

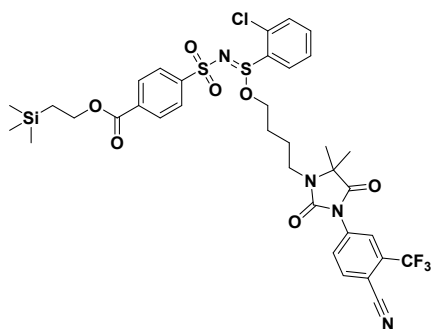

### 8f

petroleum ether / ethyl acetate = 5:1 – 1:1, a viscous waxy oil, 80% yield (129.6 mg). **<sup>1</sup>H NMR** (400 MHz, Chloroform-*d*)  $\delta$  8.18 – 8.16 (m, 1H), 8.125 – 8.120 (m, 1H), 8.10 – 8.07 (m, 2H), 7.99 – 7.94 (m, 3H), 7.88 – 7.86 (m, 1H), 7.57 – 7.53 (m, 1H), 7.49 – 7.44 (m, 2H), 4.41 – 4.37 (m, 2H), 4.18 (dt,  $J = 9.7, 5.6$  Hz, 1H), 3.77 – 3.72 (m, 1H), 3.32 (t,  $J = 7.1$  Hz, 2H), 1.74 – 1.65 (m, 4H), 1.50 (s, 6H), 1.12 –

1.08 (m, 2H), 0.04 (s, 9H).  $^{13}\text{C}$  NMR (100 MHz, Chloroform-*d*)  $\delta$  174.5, 165.3, 152.8, 146.7, 136.4, 135.1, 134.8, 133.8, 133.6, 133.4, 133.3 (q,  $J = 32.9$  Hz), 130.8, 129.9, 128.4, 127.9, 127.8, 126.2, 122.9 (q,  $J = 4.9$  Hz), 121.9 (q,  $J = 272.5$  Hz), 114.9, 107.9 (q,  $J = 2.1$  Hz), 66.8, 63.8, 61.8, 39.5, 26.5, 25.6, 23.3, 17.3, -1.6.  $^{19}\text{F}$  NMR (376 MHz, Chloroform-*d*)  $\delta$  -61.96 (s, 3F). HRMS (ESI-TOF): Anal Calcd. For.  $\text{C}_{35}\text{H}_{38}\text{ClF}_3\text{N}_4\text{O}_7\text{S}_2\text{Si}+\text{Na}^+$ : 833.1484, found: 833.1482. IR (neat,  $\text{cm}^{-1}$ ):  $\nu$  3089, 2954, 2900, 1719, 1409, 1313, 1272, 1143, 1008, 837, 762, 730.

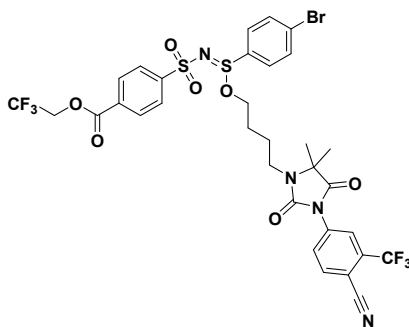

### 8g

petroleum ether / ethyl acetate = 5:1 – 1.5:1, a viscous waxy oil, 74% yield (123.7 mg).  $^1\text{H}$  NMR (400 MHz, Chloroform-*d*)  $\delta$  8.16 – 8.13 (m, 3H), 8.02 – 7.97 (m, 3H), 7.89 – 7.87 (m, 1H), 7.70 – 7.66 (m, 2H), 7.65 – 7.61 (m, 2H), 4.70 (q,  $J = 8.3$  Hz, 2H), 4.13 (dt,  $J = 9.8, 5.7$  Hz, 1H), 3.62 (dt,  $J = 9.6, 5.5$  Hz, 1H), 3.33 (t,  $J = 7.1$  Hz, 2H), 1.73 – 1.65 (m, 4H), 1.52 (d,  $J = 2.9$  Hz, 6H).  $^{13}\text{C}$  NMR (100 MHz, Chloroform-*d*)  $\delta$  174.5, 163.5, 152.8, 147.7, 136.4, 135.1, 133.9, 133.3 (q,  $J = 33.2$  Hz), 133.1, 131.4, 130.5, 128.9, 128.7, 127.9, 126.5, 123.0 (q,  $J = 4.9$  Hz), 122.8 (q,  $J = 275.6$  Hz), 121.9 (q,  $J = 272.5$  Hz), 115.0, 108.0 (q,  $J = 2.1$  Hz), 65.2, 61.9, 61.0 (q,  $J = 36.8$  Hz), 39.5, 26.5, 25.6, 23.29, 23.26.  $^{19}\text{F}$  NMR (376 MHz, Chloroform-*d*)  $\delta$  -61.98 (s, 3F), -73.58 (s, 3F). HRMS (ESI-TOF): Anal Calcd. For.  $\text{C}_{32}\text{H}_{27}\text{BrF}_6\text{N}_4\text{O}_7\text{S}_2+\text{Na}^+$ : 859.0301, found: 859.0298. IR (neat,  $\text{cm}^{-1}$ ):  $\nu$  2977, 2941, 1720, 1384, 1312, 1296, 1149, 1000, 729.

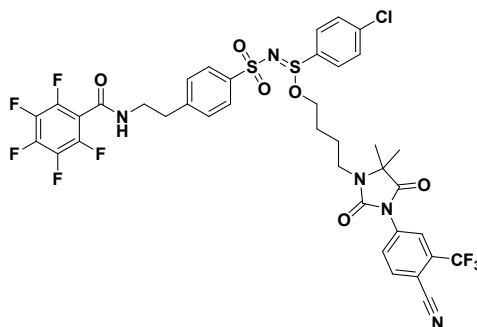

### 8h

petroleum ether / ethyl acetate = 2:1 – 1:2, a viscous waxy oil, 69% yield (124.6 mg). **<sup>1</sup>H NMR** (400 MHz, Chloroform-*d*)  $\delta$  8.121 – 8.116 (m, 1H), 7.99 – 7.96 (m, 1H), 7.88 – 7.86 (m, 1H), 7.75 – 7.72 (m, 2H), 7.69 – 7.65 (m, 2H), 7.52 – 7.47 (m, 2H), 7.32 – 7.30 (m, 2H), 6.73 (t,  $J$  = 5.9 Hz, 1H), 4.05 (dt,  $J$  = 9.7, 5.8 Hz, 1H), 3.66 (q,  $J$  = 6.6 Hz, 2H), 3.55 (dt,  $J$  = 9.7, 5.8 Hz, 1H), 3.30 (t,  $J$  = 7.1 Hz, 2H), 2.96 (t,  $J$  = 6.9 Hz, 2H), 1.73 – 1.60 (m, 4H), 1.51 (s, 3H), 1.50 (s, 3H). **<sup>13</sup>C NMR** (100 MHz, Chloroform-*d*)  $\delta$  174.5, 157.4, 152.8, 143.3, 141.0, 140.1, 136.4, 135.2, 133.5, 133.3 (q,  $J$  = 33.3 Hz), 130.0, 129.3, 128.6, 127.9, 126.4, 122.9 (q,  $J$  = 4.9 Hz), 121.9 (q,  $J$  = 274.2 Hz), 114.9, 107.9 (q,  $J$  = 2.0 Hz), 65.0, 61.9, 40.9, 39.5, 34.9, 26.5, 25.6, 23.25, 23.22. **<sup>19</sup>F NMR** (376 MHz, Chloroform-*d*)  $\delta$  -62.02 (s, 3F), -140.74 – -140.85 (m, 2F), -151.25 – -151.38 (m, 1F), -160.21 – -160.37 (m, 2F). **HRMS** (ESI-TOF): Anal Calcd. For. C<sub>38</sub>H<sub>30</sub>ClF<sub>8</sub>N<sub>5</sub>O<sub>6</sub>S<sub>2</sub>+Na<sup>+</sup>: 926.1091, found: 926.1095. **IR** (neat, cm<sup>-1</sup>):  $\nu$  3329, 2978, 2941, 2230, 1720, 1474, 1410, 1313, 1144, 991, 728.

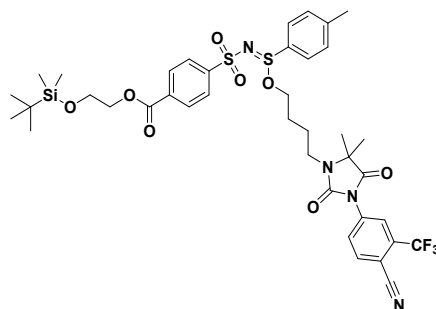

### 8i

petroleum ether / ethyl acetate = 5:1 – 1.5:1, a viscous waxy oil, 62% yield (105.2 mg). **<sup>1</sup>H NMR** (400 MHz, Chloroform-*d*)  $\delta$  8.14 – 8.10 (m, 3H), 8.00 – 7.97 (m, 3H), 7.89 – 7.87 (m, 1H), 7.65 – 7.61 (m, 2H), 7.34 – 7.32 (m, 2H), 4.39 – 4.36 (m, 2H), 4.10 (dt,  $J$  = 9.7, 5.8 Hz, 1H), 3.92 – 3.90 (m, 2H), 3.57 (dt,  $J$  = 9.7, 5.6 Hz, 1H), 3.33 (t,  $J$  = 7.2 Hz, 2H), 2.40 (s, 3H), 1.75 – 1.64 (m, 4H), 1.52 (s, 3H), 1.51 (s,

3H), 0.85 (s, 9H), 0.04 (s, 6H). **<sup>13</sup>C NMR** (100 MHz, Chloroform-*d*)  $\delta$  174.5, 165.2, 152.8, 147.1, 144.6, 136.4, 135.1, 133.3 (q,  $J = 33.3$  Hz), 133.2, 131.6, 130.4, 130.0, 127.9, 127.1, 126.3, 122.9 (q,  $J = 4.8$  Hz), 121.9 (q,  $J = 274.2$  Hz), 115.0, 108.0 (q,  $J = 2.0$  Hz), 66.6, 64.4, 61.9, 61.0, 39.5, 26.5, 25.7, 23.28, 23.26, 21.4, 18.2, -5.4. **<sup>19</sup>F NMR** (376 MHz, Chloroform-*d*)  $\delta$  -61.97 (s, 3F). **HRMS** (ESI-TOF): Anal Calcd. For. C<sub>39</sub>H<sub>47</sub>F<sub>3</sub>N<sub>4</sub>O<sub>8</sub>S<sub>2</sub>Si+Na<sup>+</sup>: 871.2449, found: 871.2443. **IR** (neat, cm<sup>-1</sup>):  $\nu$  2988, 2939, 2256, 2233, 1720, 1410, 1313, 1159, 1141, 1070, 1053, 995, 832, 729.

# NMR Spectra

## <sup>1</sup>H NMR (400 MHz, Chloroform-*d*) of compound 4a

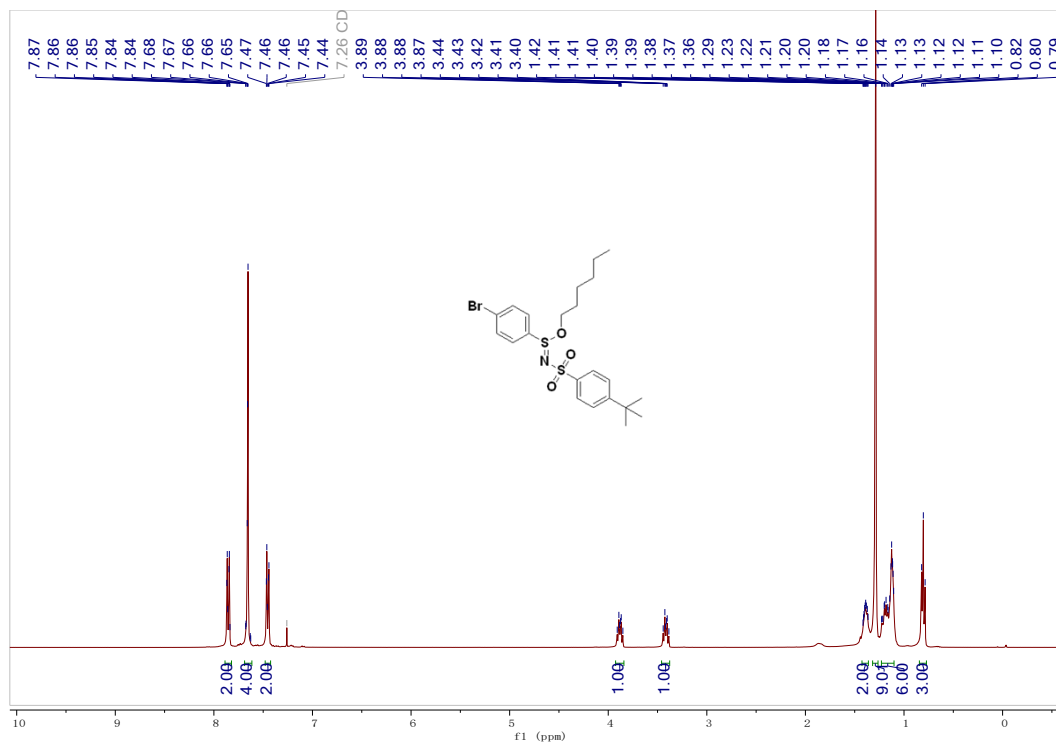

## <sup>13</sup>C NMR (100 MHz, Chloroform-*d*) of compound 4a

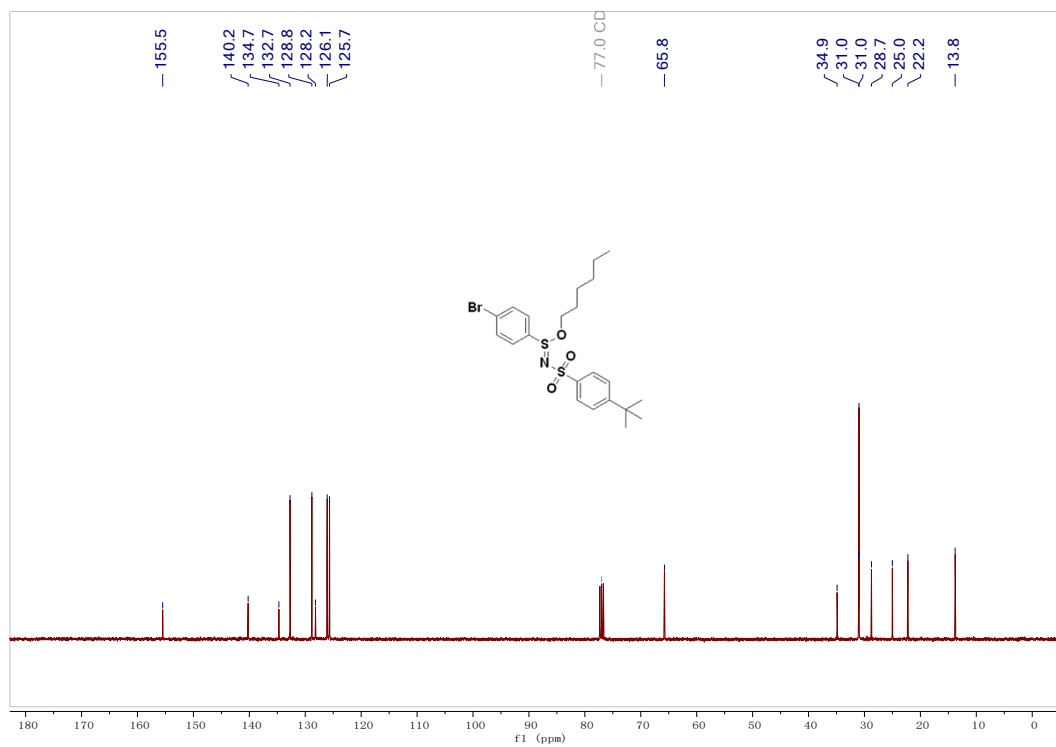



**<sup>1</sup>H NMR (400 MHz, Chloroform-*d*) of compound 4b**

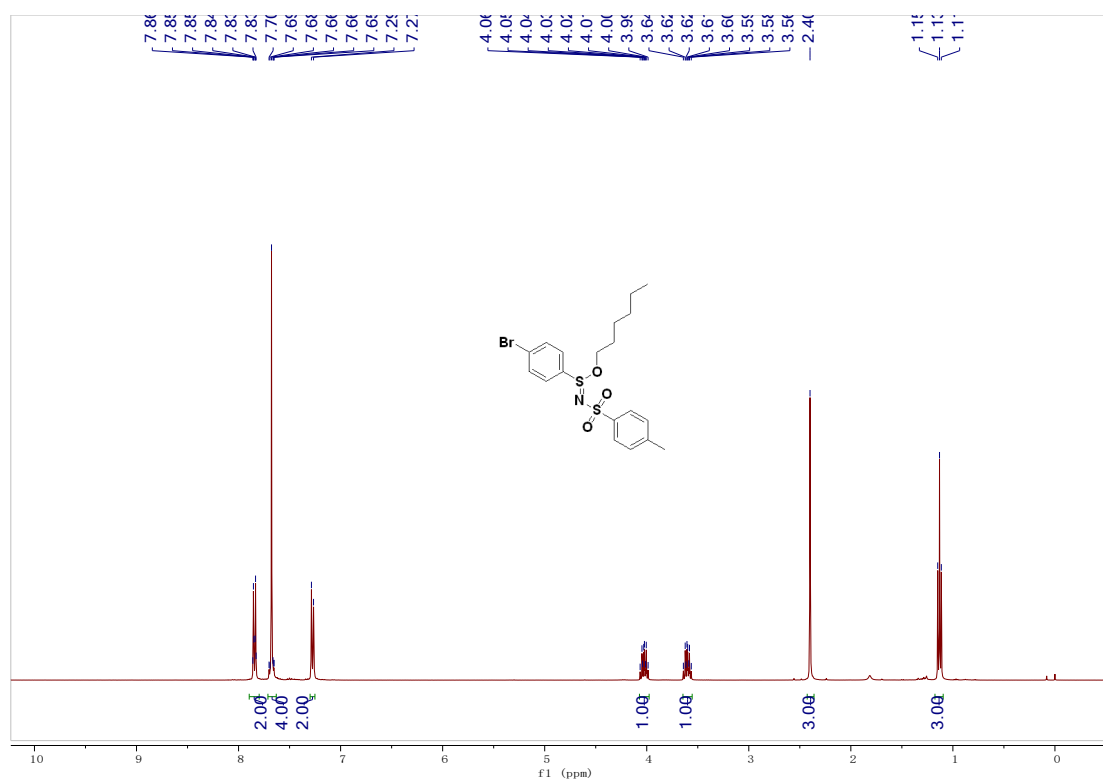

**<sup>13</sup>C NMR (100 MHz, Chloroform-*d*) of compound 4b**

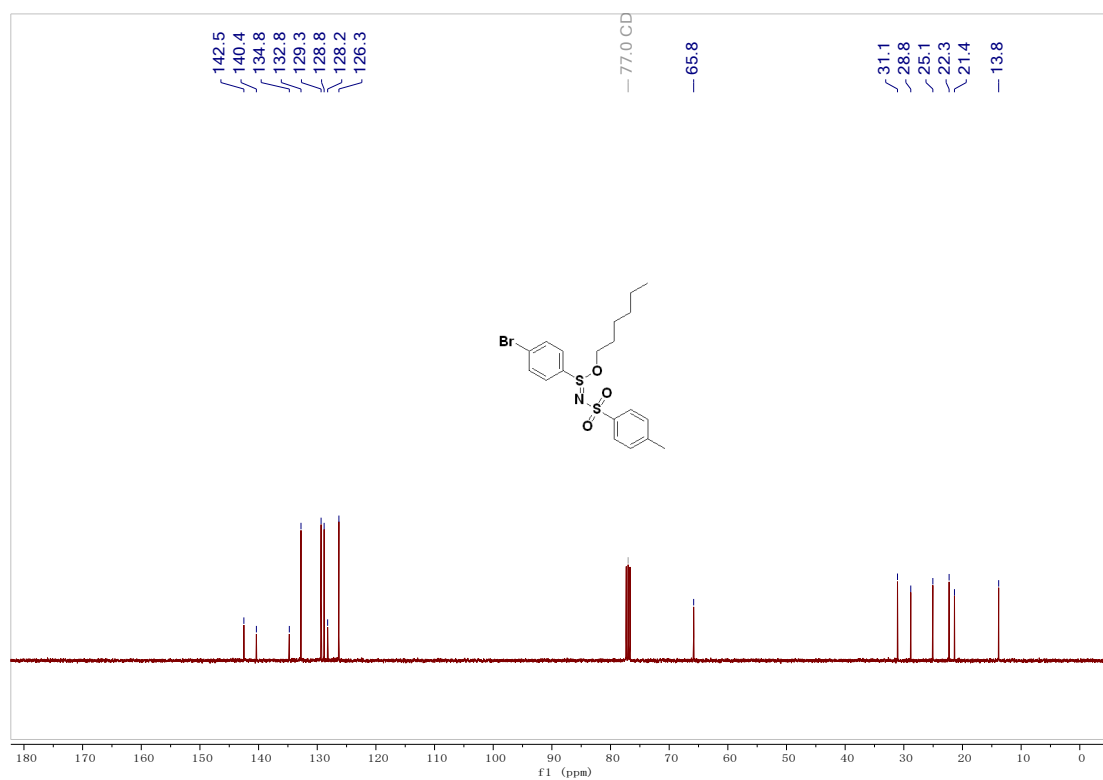

<sup>1</sup>H NMR (400 MHz, Chloroform-*d*) of compound **4c**

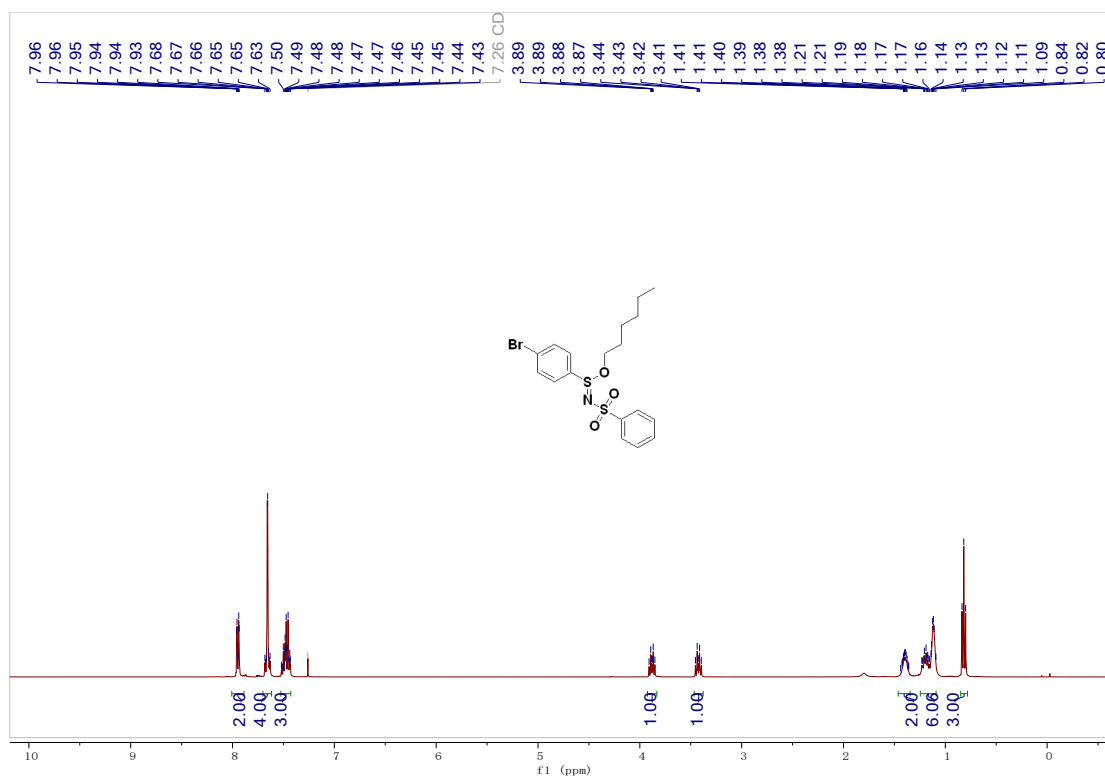

<sup>13</sup>C NMR (100 MHz, Chloroform-*d*) of compound **4c**

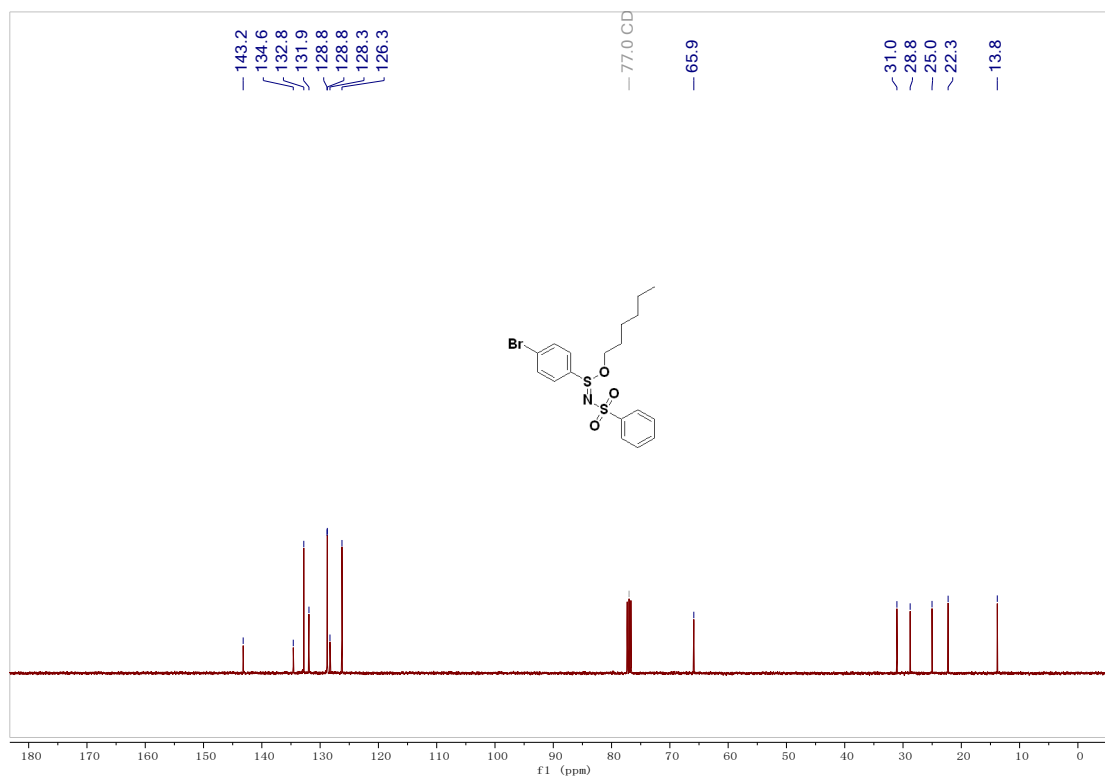

**<sup>1</sup>H NMR (400 MHz, Chloroform-*d*) of compound 4d**

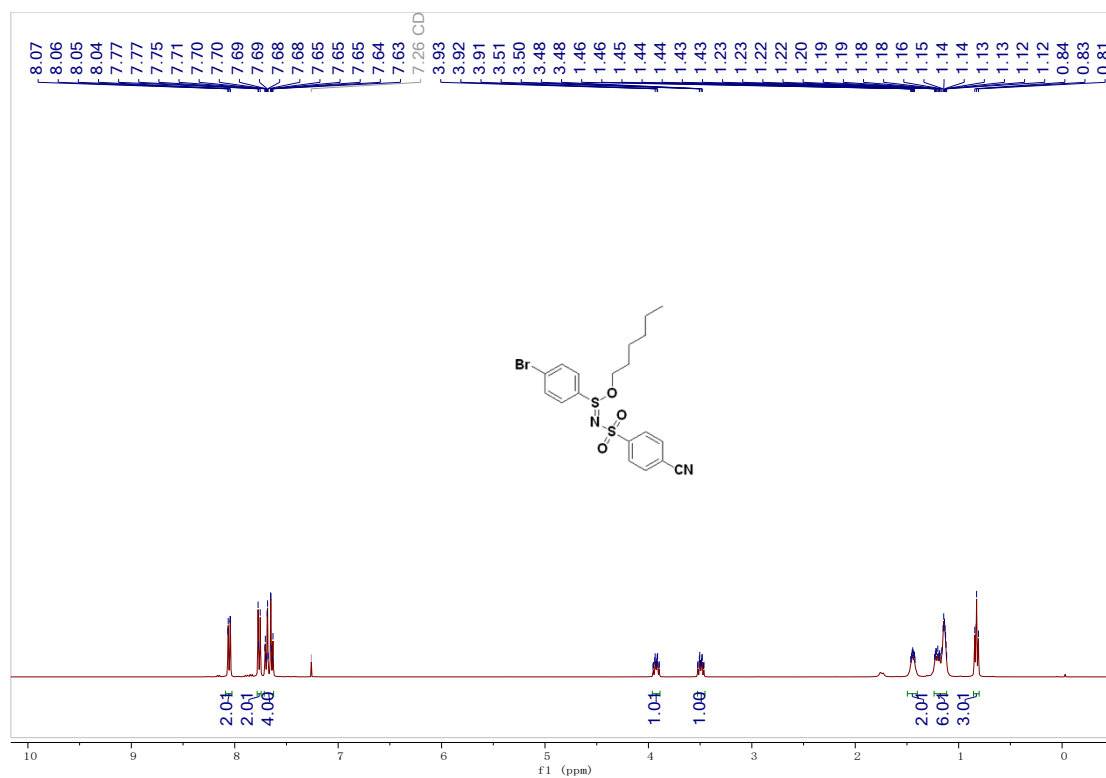

**<sup>13</sup>C NMR (100 MHz, Chloroform-*d*) of compound 4d**

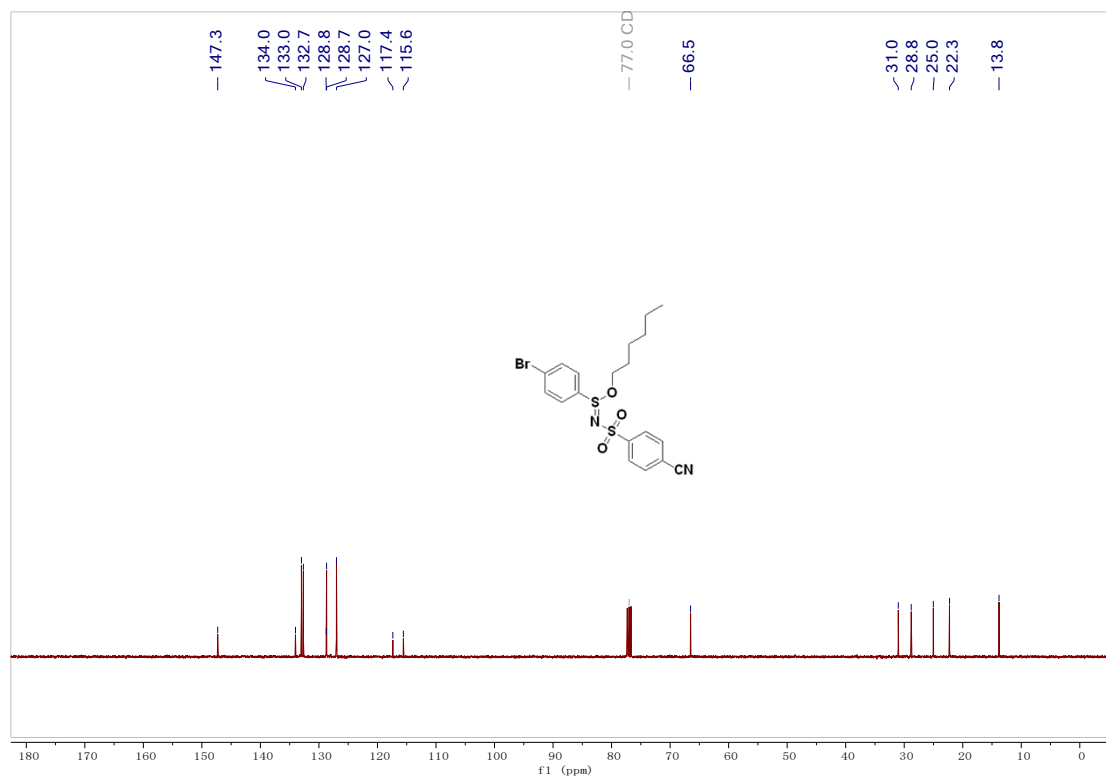

**<sup>1</sup>H NMR (400 MHz, Chloroform-*d*) of compound 4e**

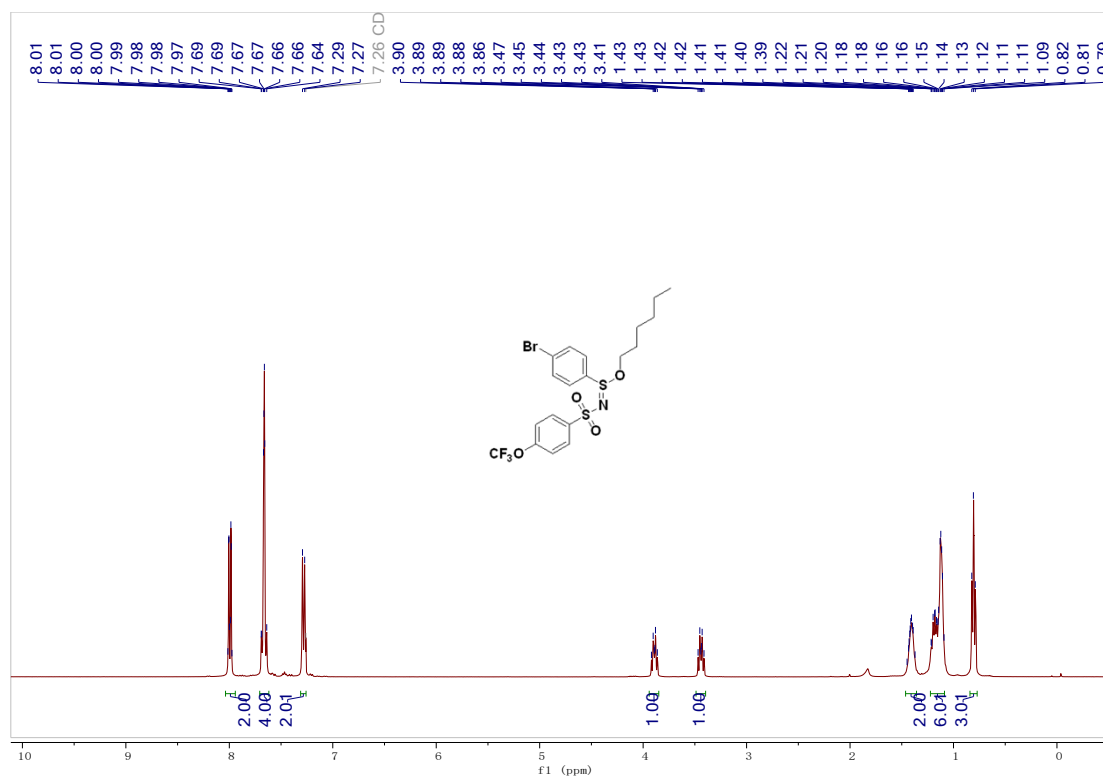

**<sup>13</sup>C NMR (100 MHz, Chloroform-*d*) of compound 4e**

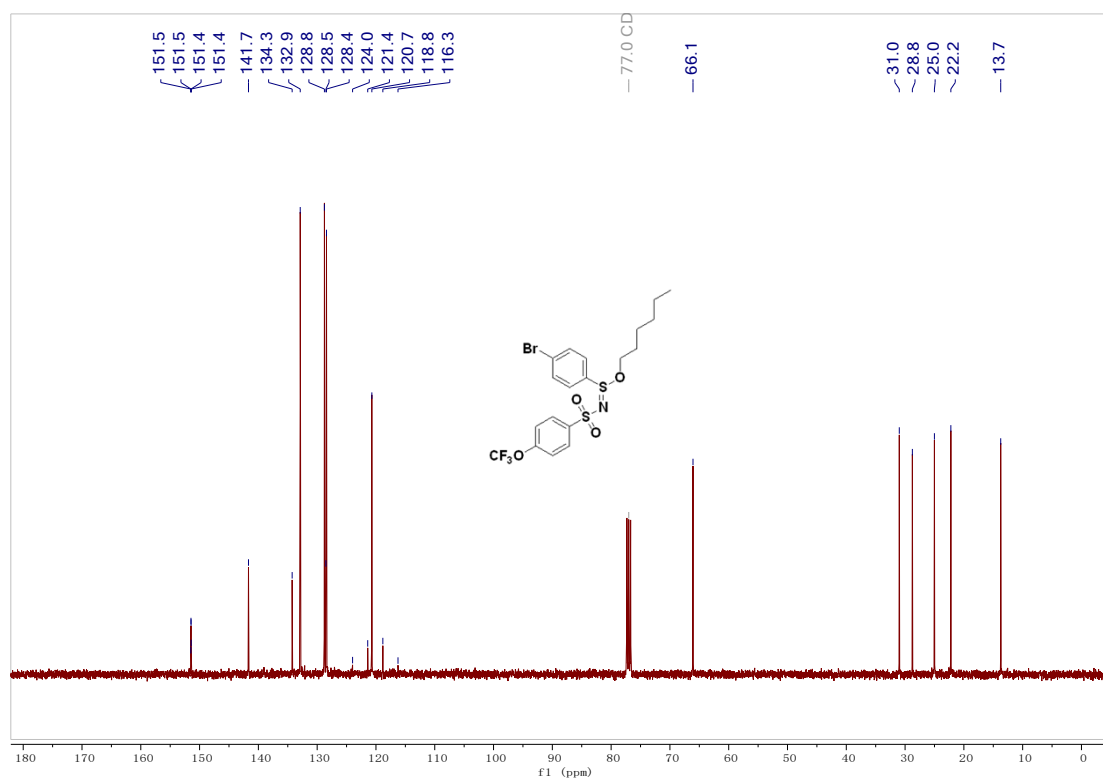

**<sup>19</sup>F NMR (376 MHz, Chloroform-d) of compound 4e**

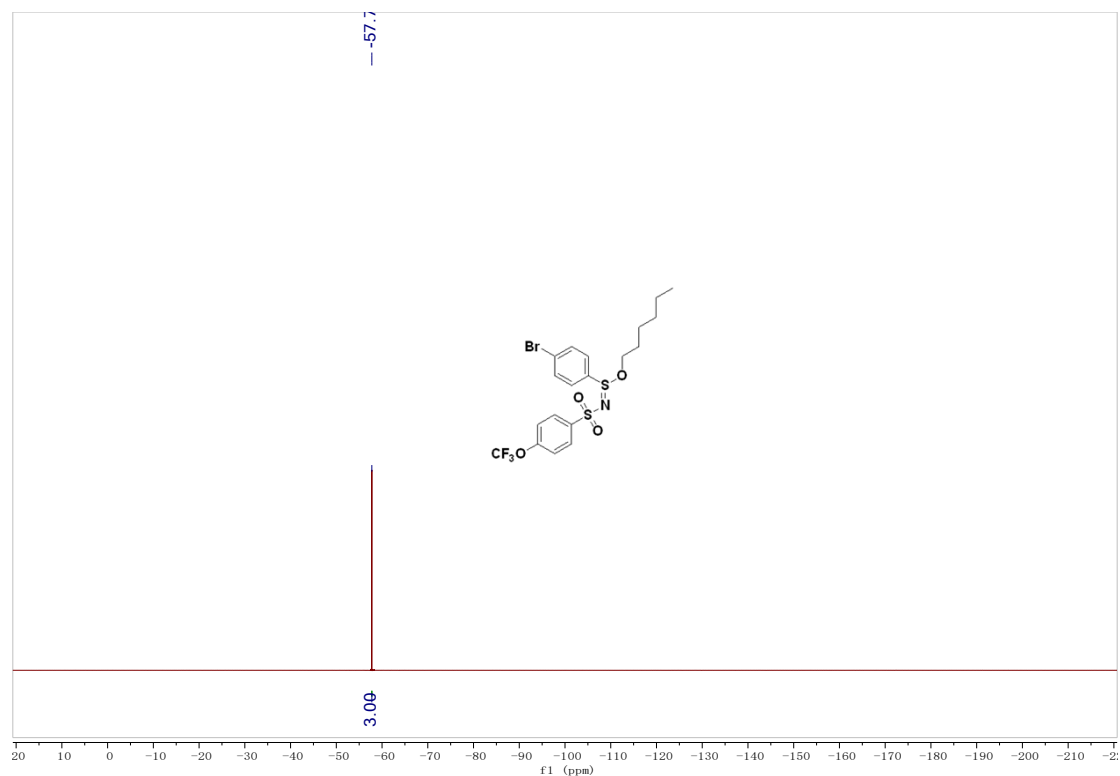

**<sup>1</sup>H NMR (400 MHz, Chloroform-d) of compound 4f**

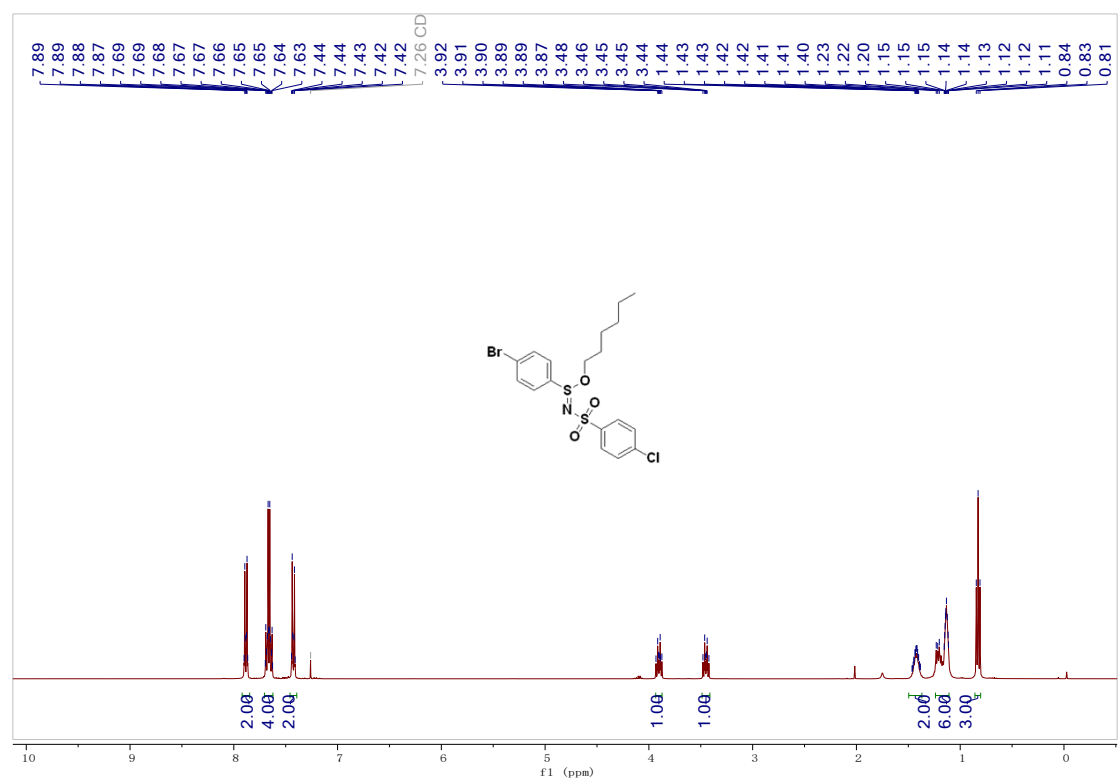

<sup>13</sup>C NMR (100 MHz, Chloroform-*d*) of compound **4f**

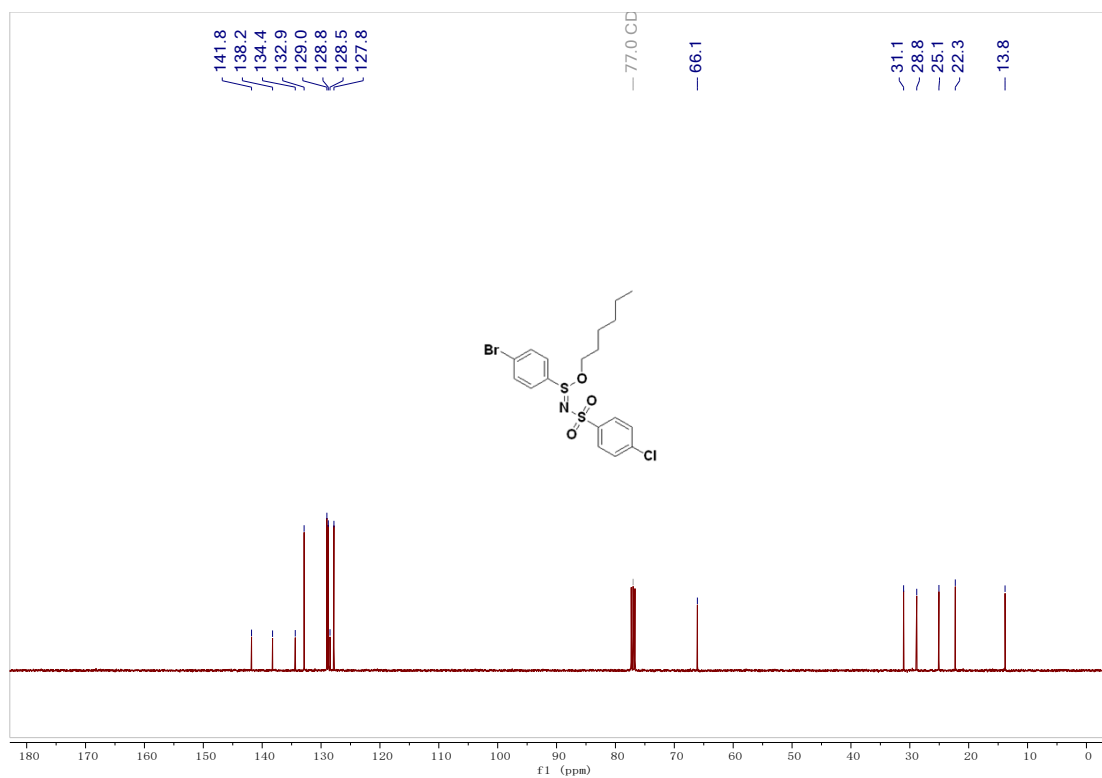

<sup>1</sup>H NMR (400 MHz, Chloroform-*d*) of compound **4g**

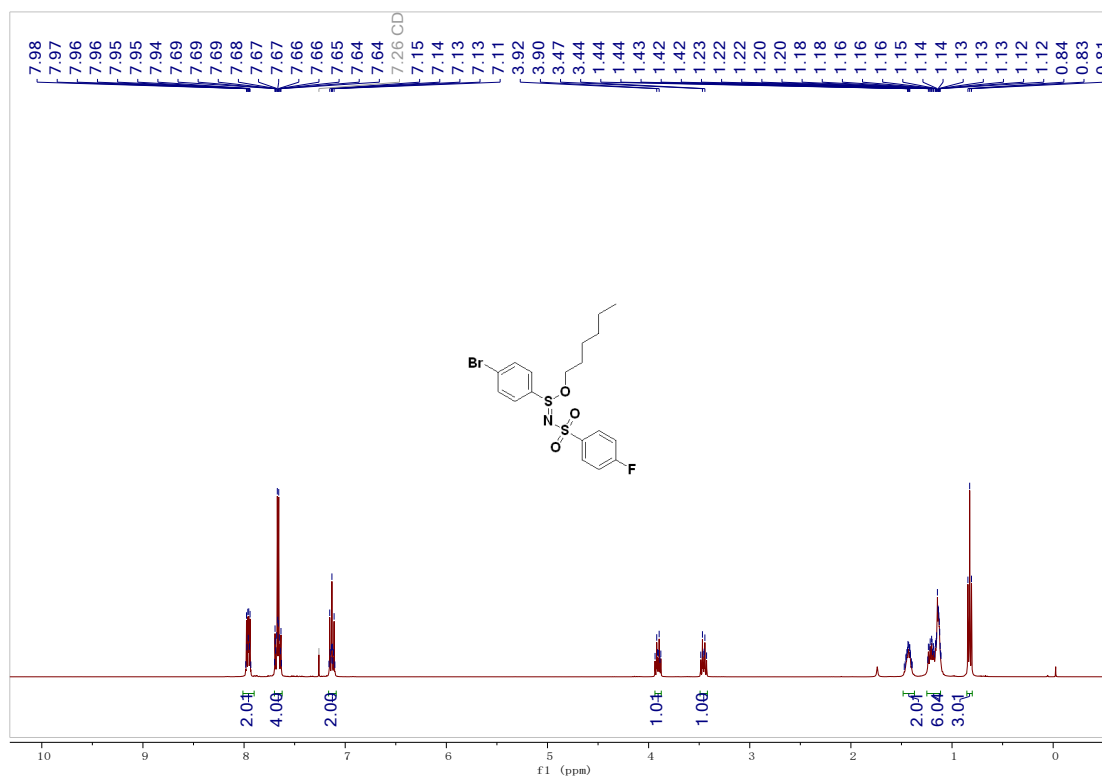

**<sup>13</sup>C NMR (100 MHz, Chloroform-*d*) of compound 4g**

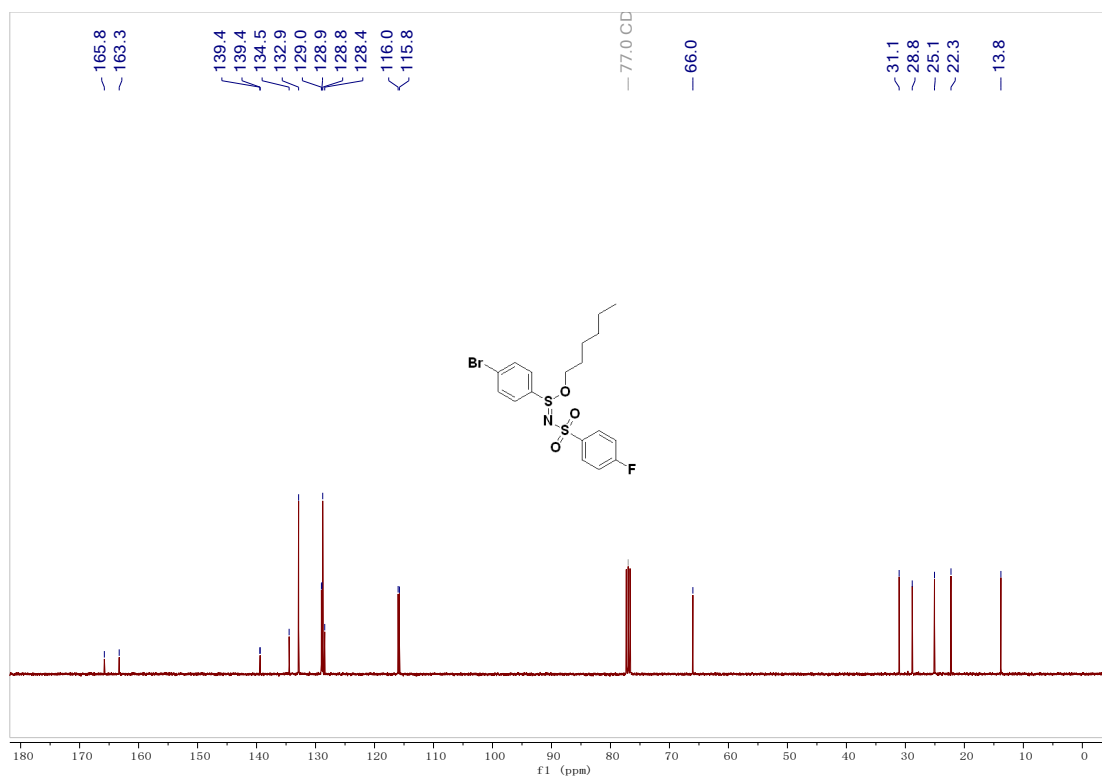

**<sup>19</sup>F NMR (376 MHz, Chloroform-*d*) of compound 4g**

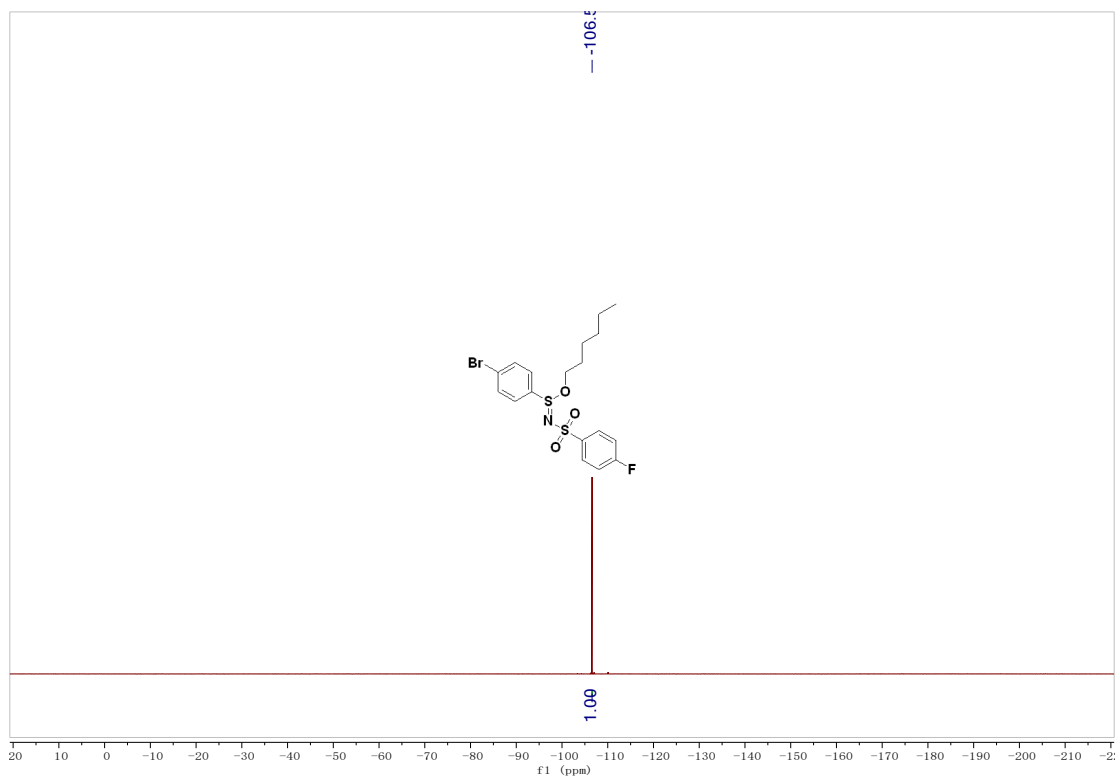

<sup>1</sup>H NMR (400 MHz, Chloroform-*d*) of compound **4h**

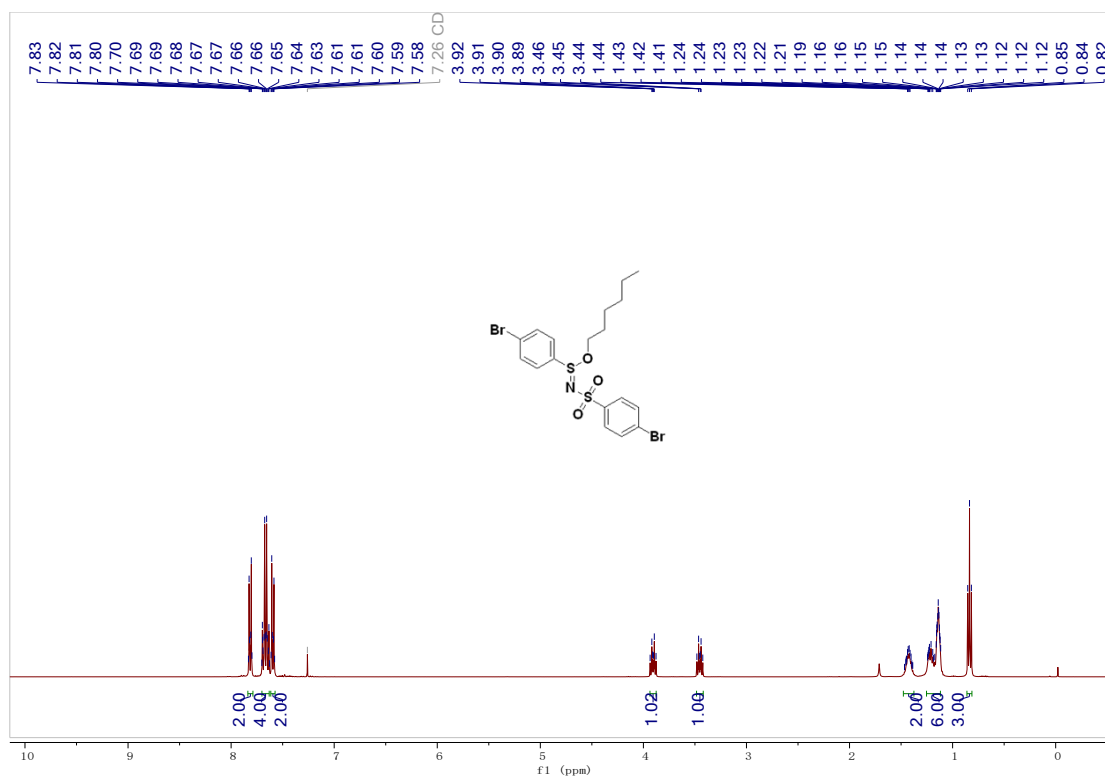

<sup>13</sup>C NMR (100 MHz, Chloroform-*d*) of compound **4h**

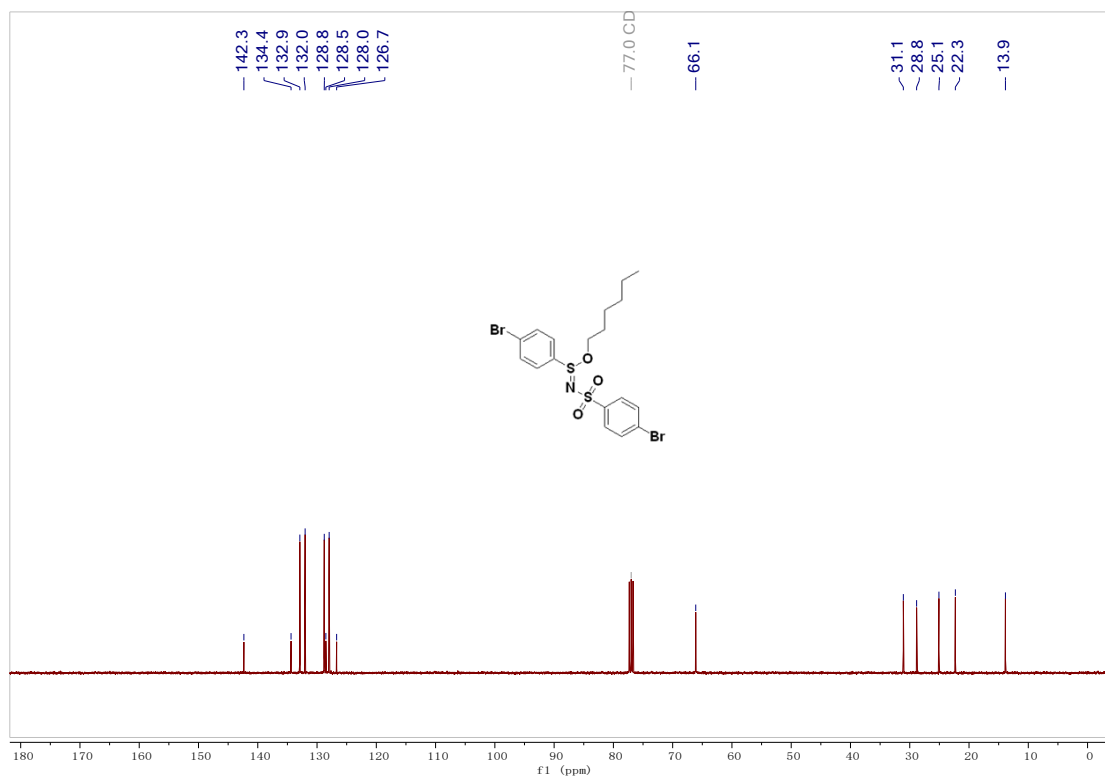



<sup>1</sup>H NMR (400 MHz, Chloroform-*d*) of compound **4i**

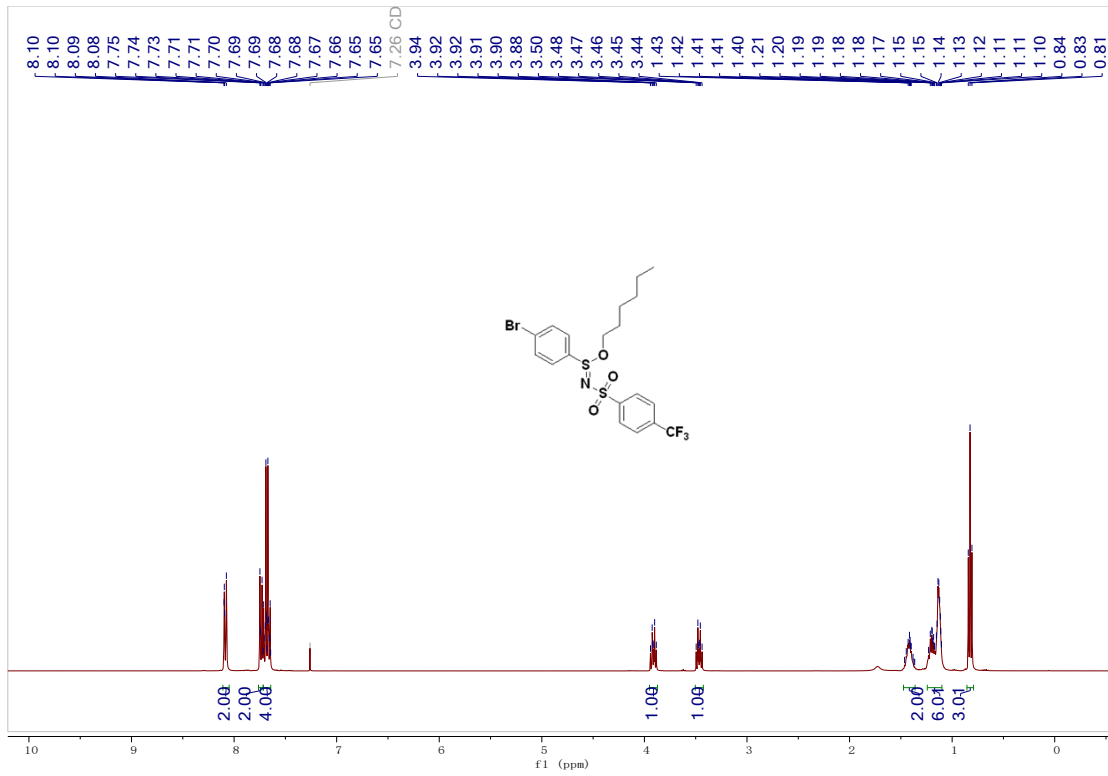

<sup>13</sup>C NMR (100 MHz, Chloroform-*d*) of compound **4i**

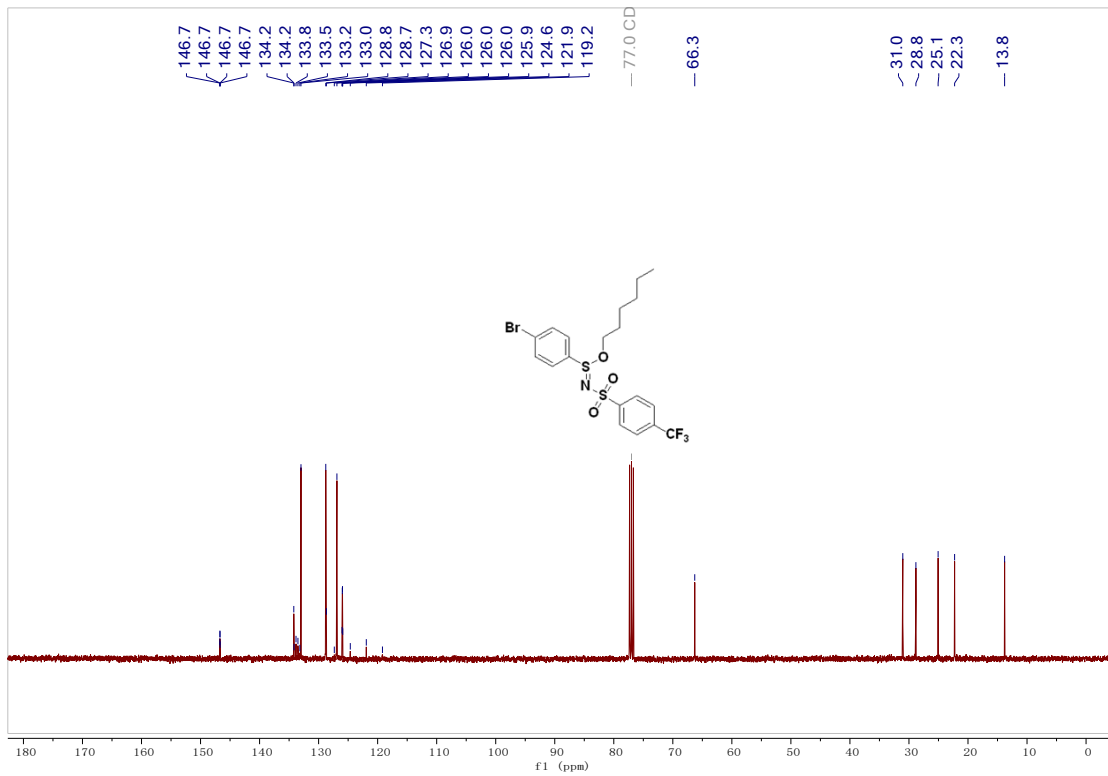

**<sup>19</sup>F NMR (376 MHz, Chloroform-*d*) of compound 4i**

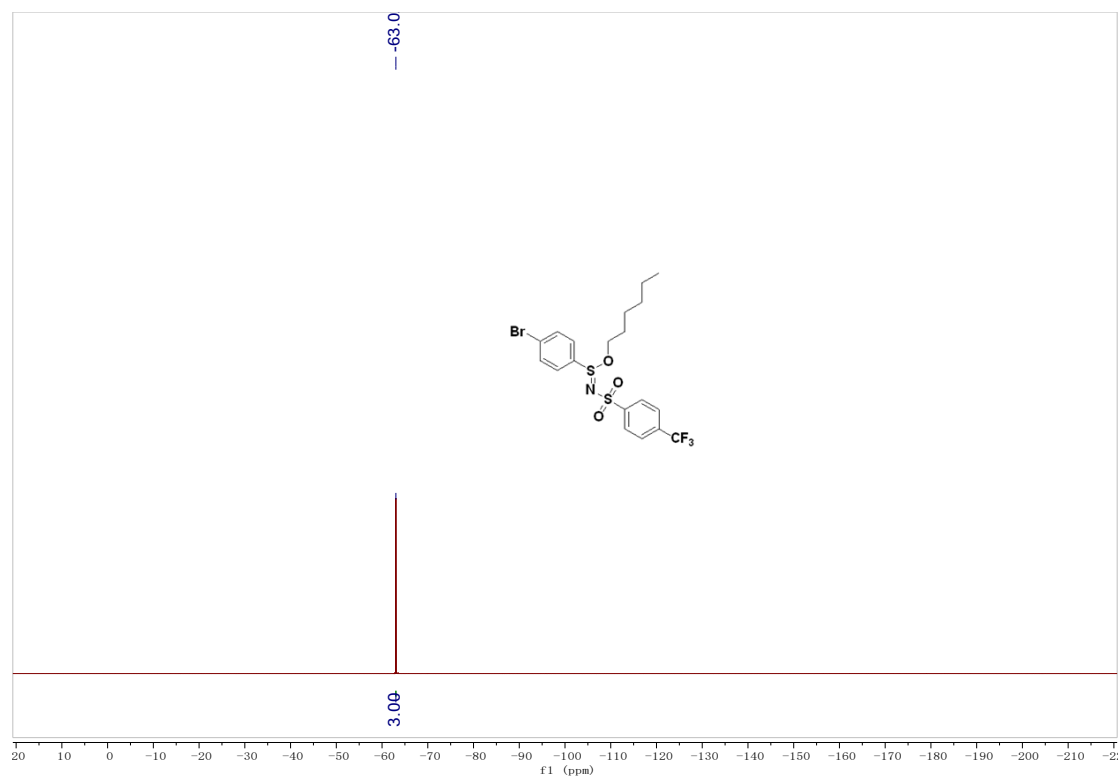

**<sup>1</sup>H NMR (400 MHz, Chloroform-*d*) of compound 4j**

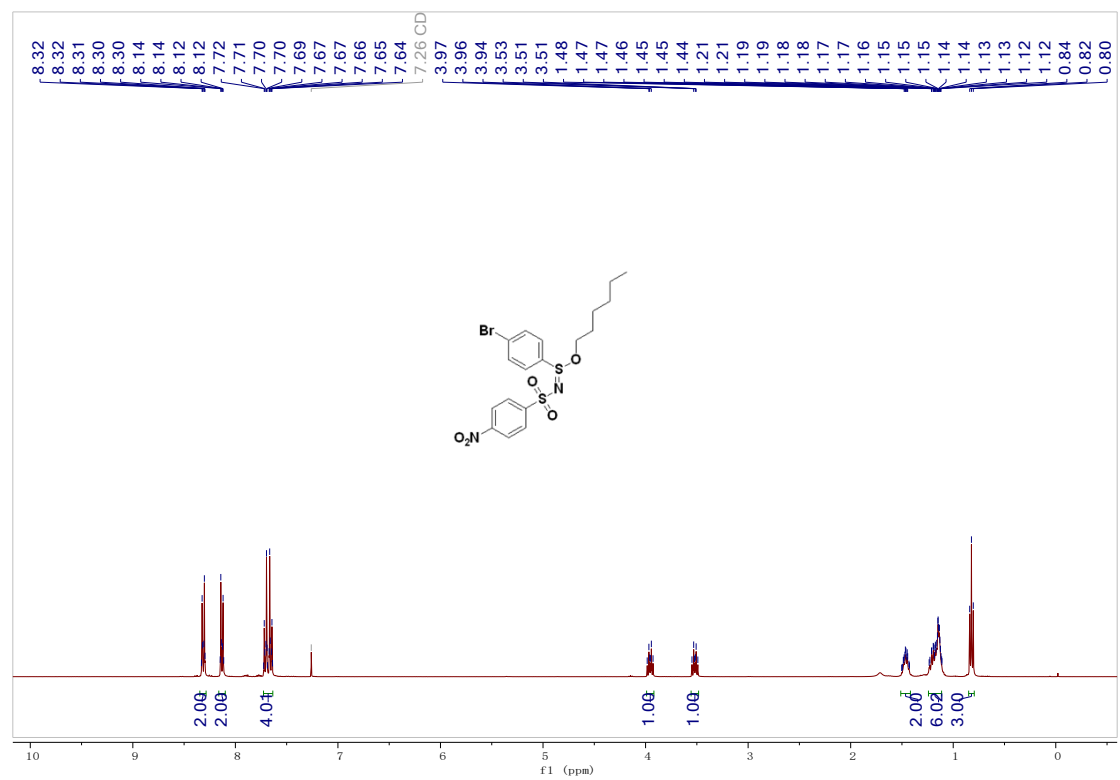

<sup>13</sup>C NMR (100 MHz, Chloroform-*d*) of compound **4j**

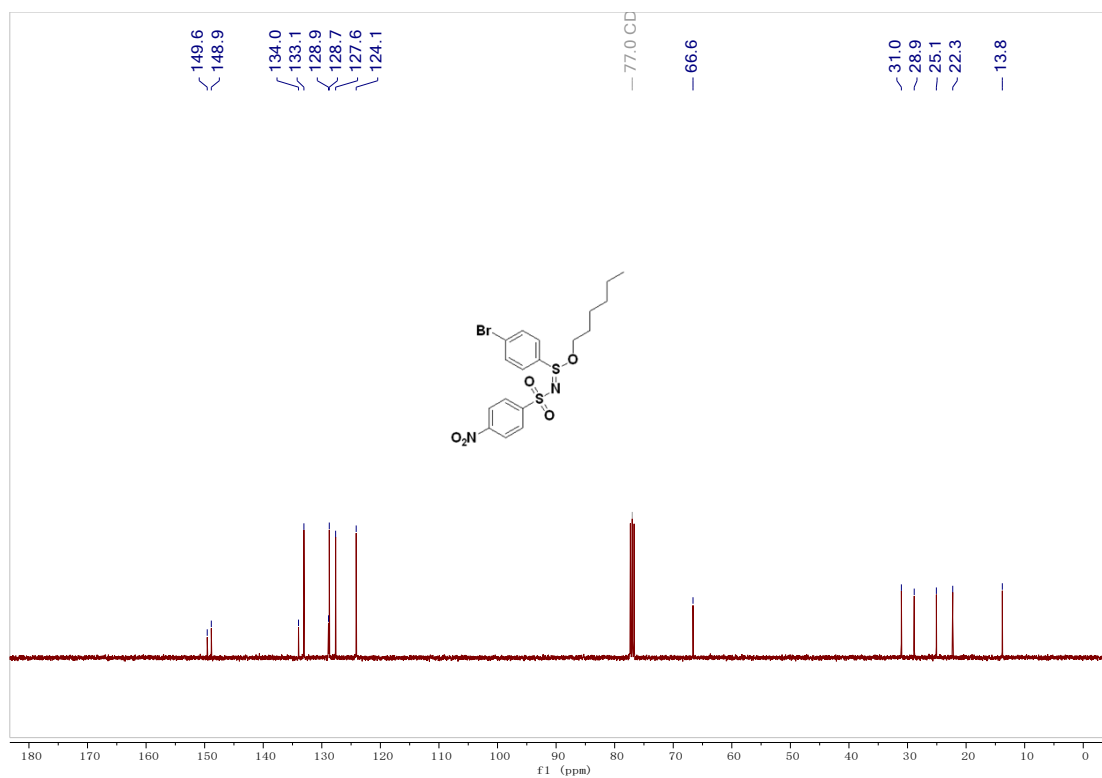

<sup>1</sup>H NMR (400 MHz, Chloroform-*d*) of compound **4k**

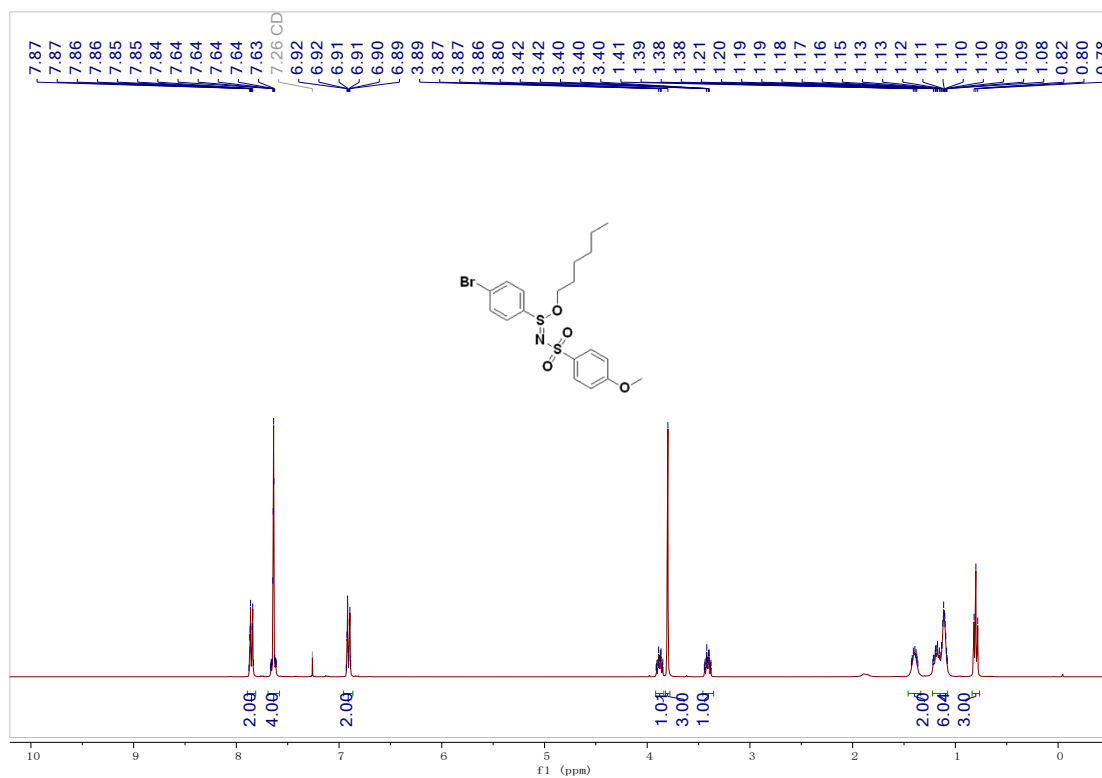

<sup>13</sup>C NMR (100 MHz, Chloroform-*d*) of compound **4k**

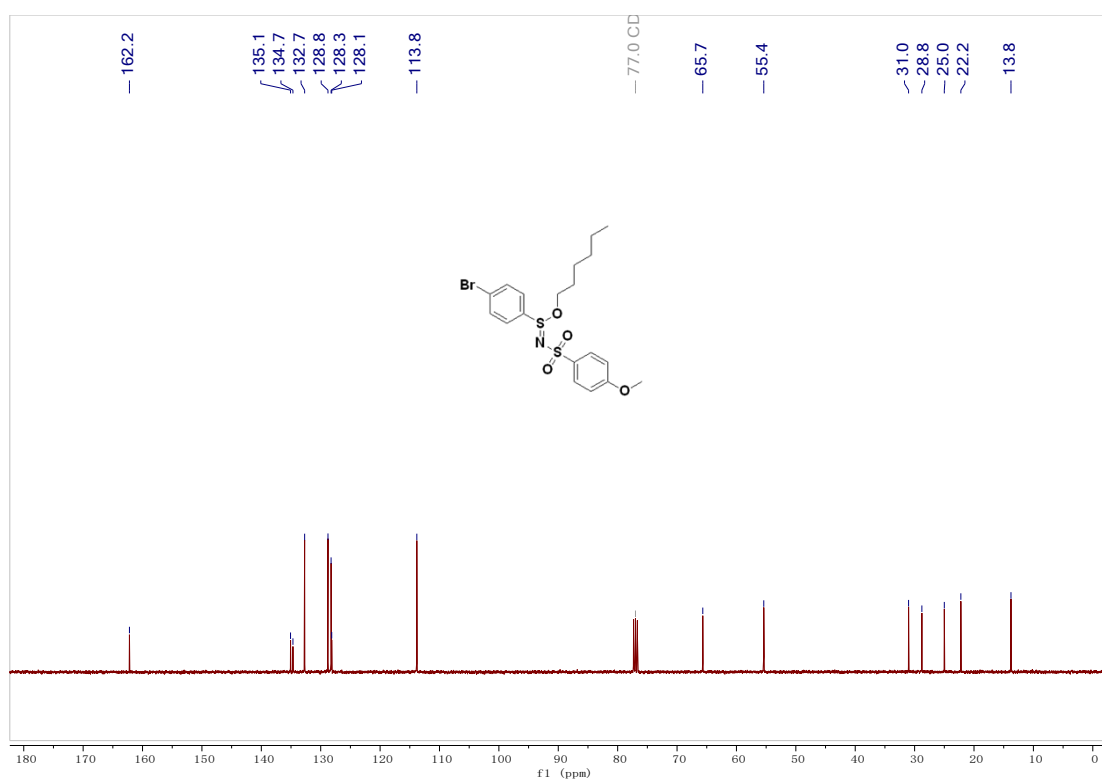

<sup>1</sup>H NMR (400 MHz, Chloroform-*d*) of compound **4l**

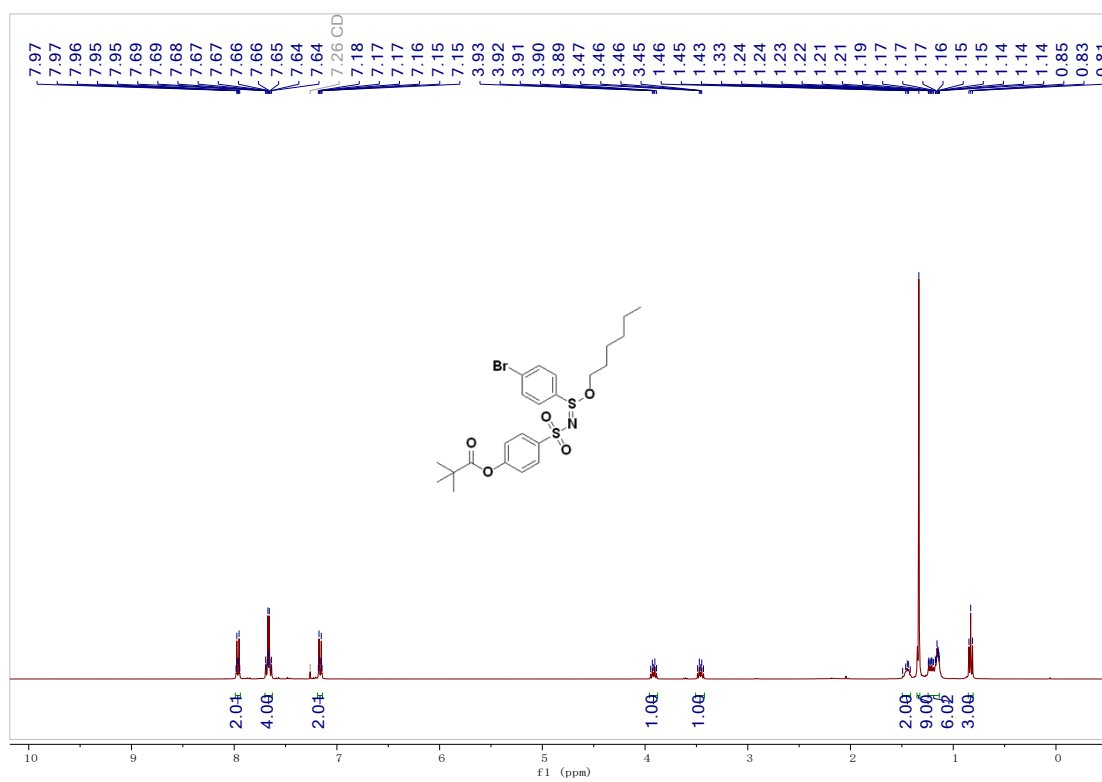

**<sup>13</sup>C NMR (100 MHz, Chloroform-*d*) of compound 4l**

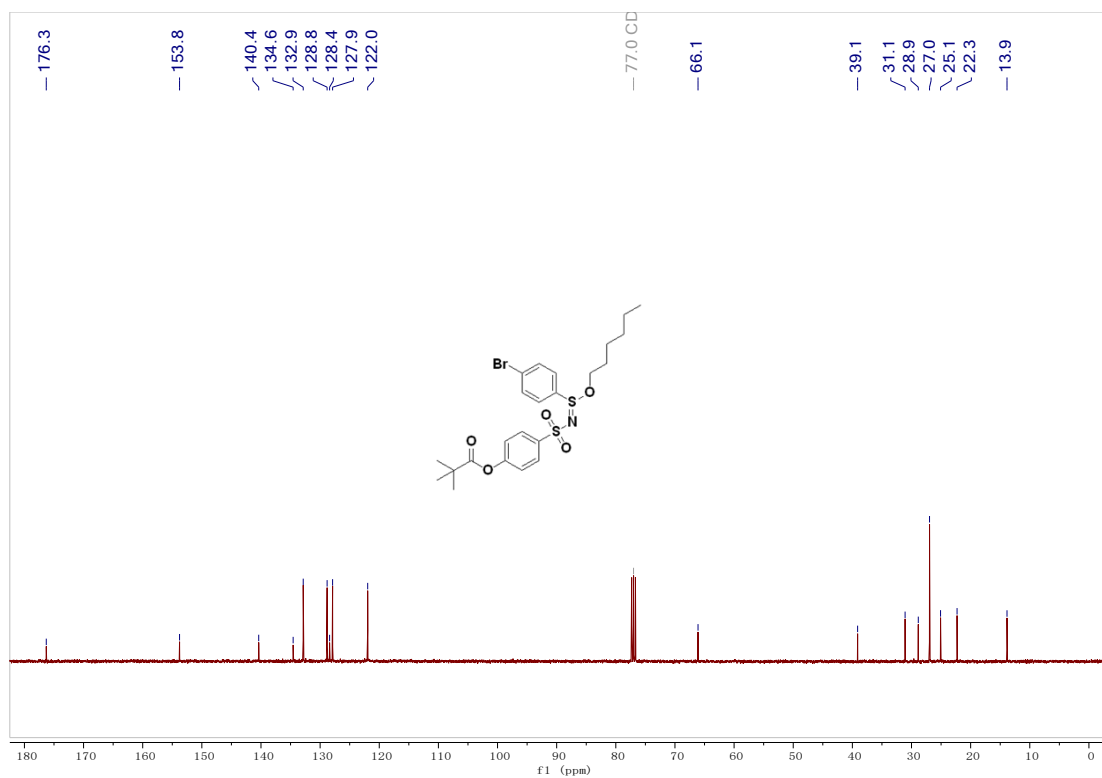

**<sup>1</sup>H NMR (400 MHz, Chloroform-*d*) of compound 4m**

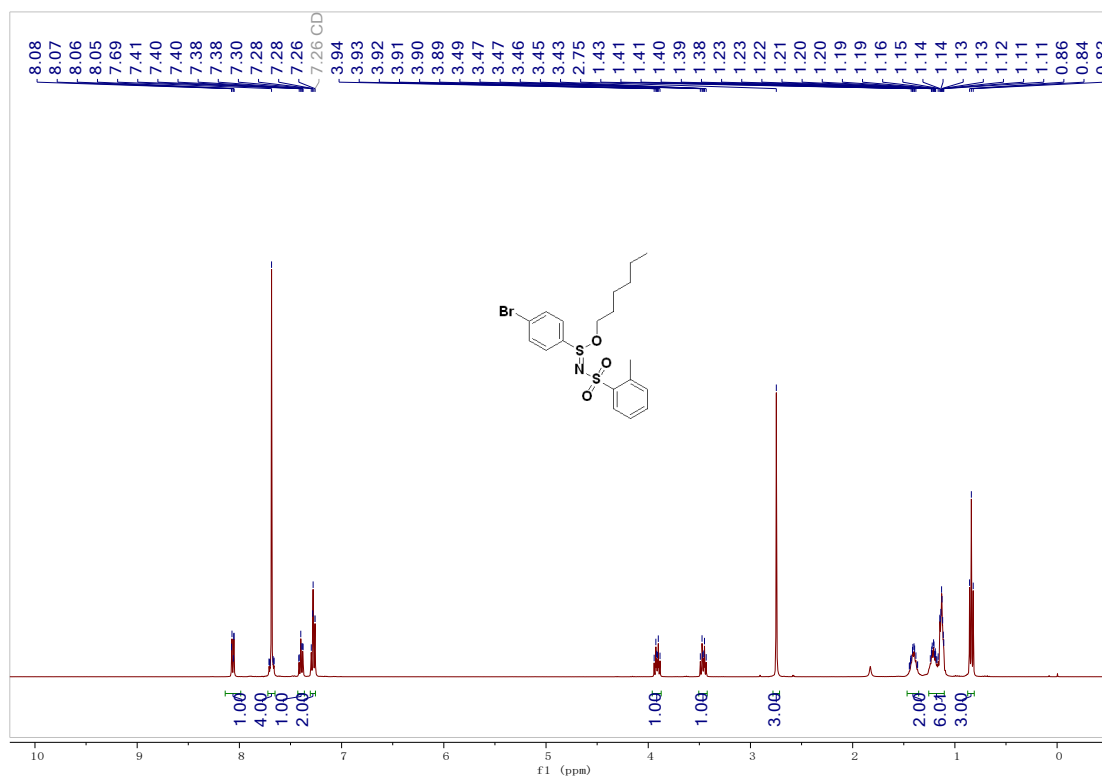

**<sup>13</sup>C NMR (100 MHz, Chloroform-*d*) of compound 4m**

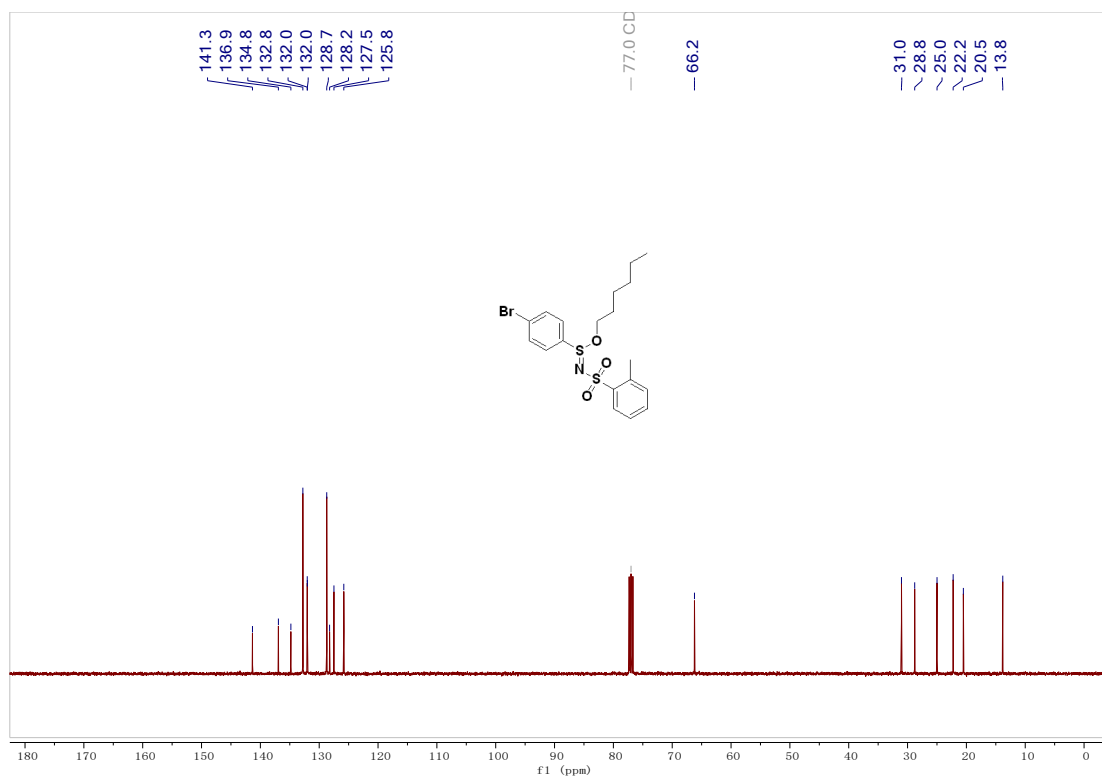

**<sup>1</sup>H NMR (400 MHz, Chloroform-*d*) of compound 4n**

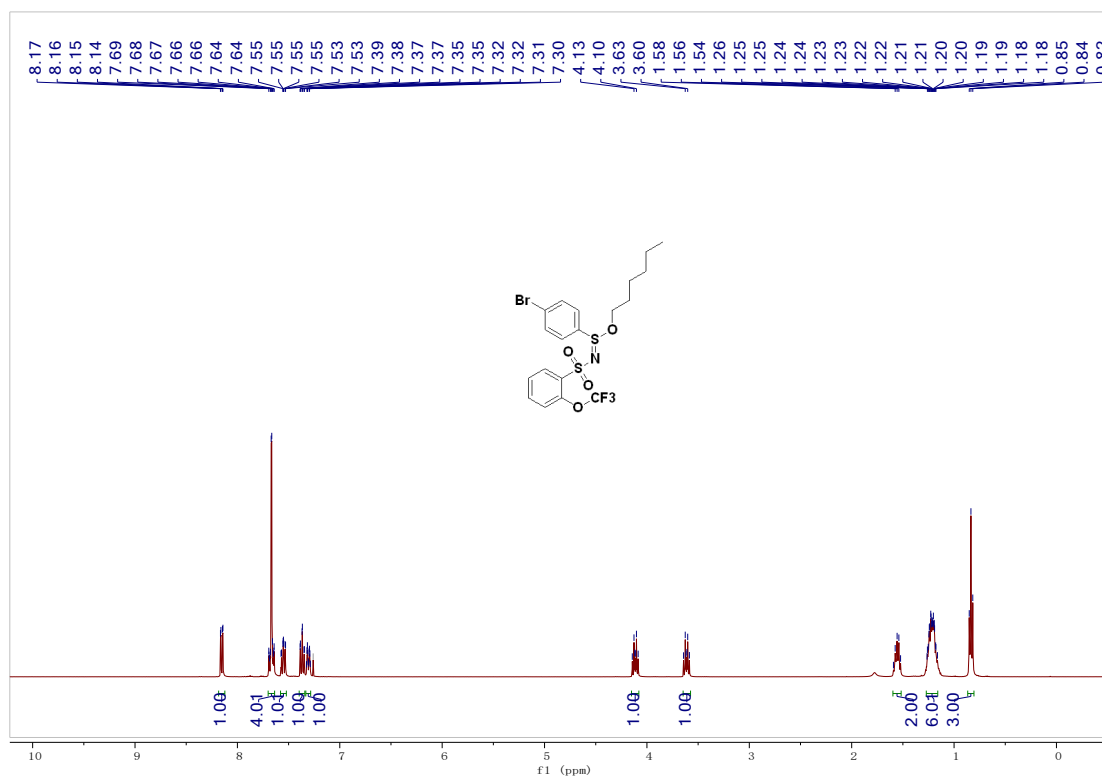

**<sup>13</sup>C NMR (100 MHz, Chloroform-*d*) of compound 4n**

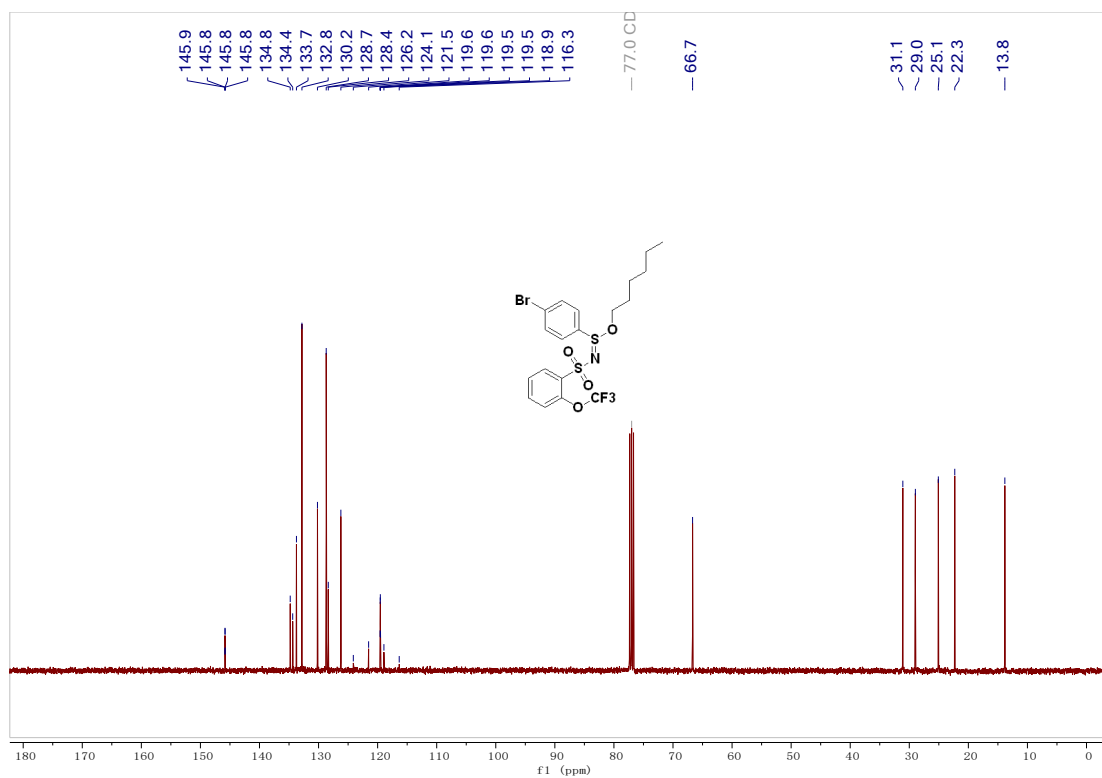

**<sup>19</sup>F NMR (376 MHz, Chloroform-*d*) of compound 4n**

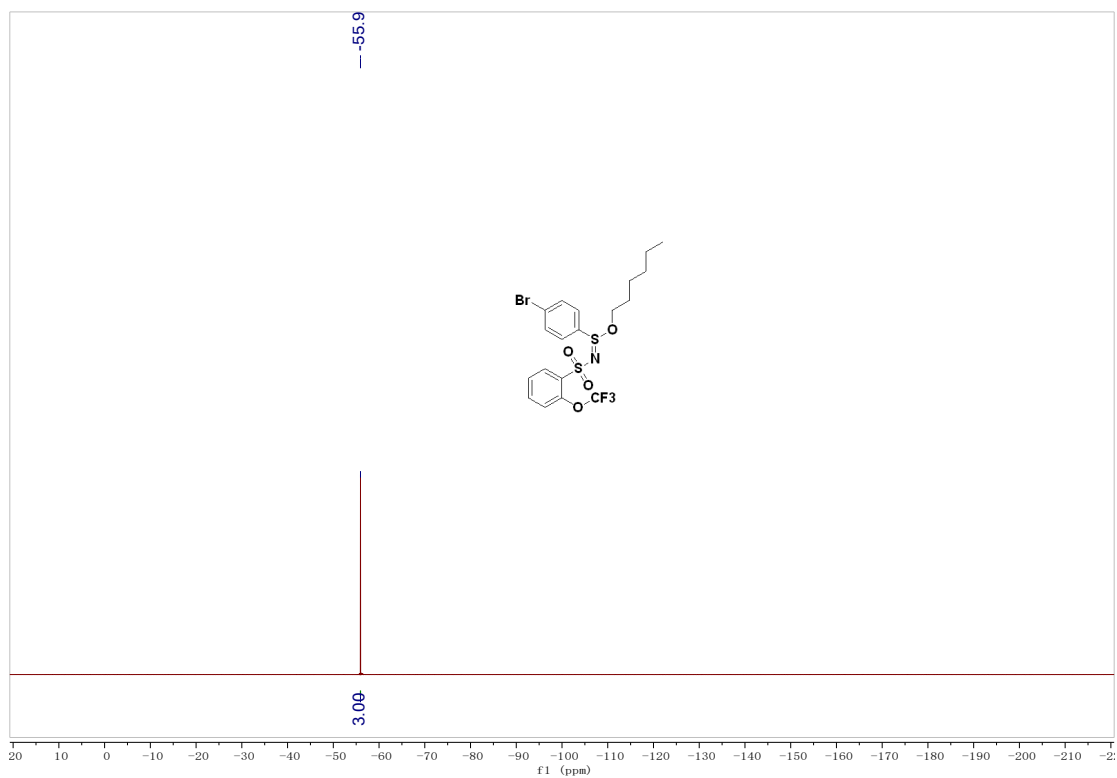

<sup>1</sup>H NMR (400 MHz, Chloroform-*d*) of compound **4o**

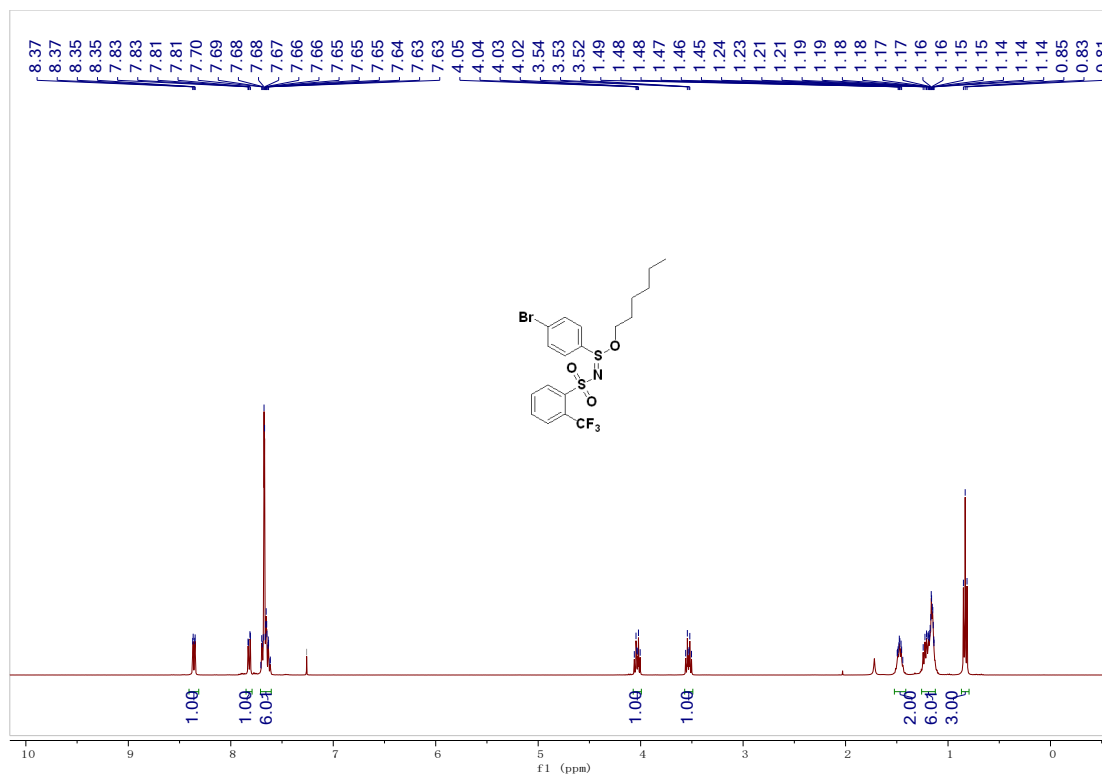

<sup>13</sup>C NMR (100 MHz, Chloroform-*d*) of compound **4o**

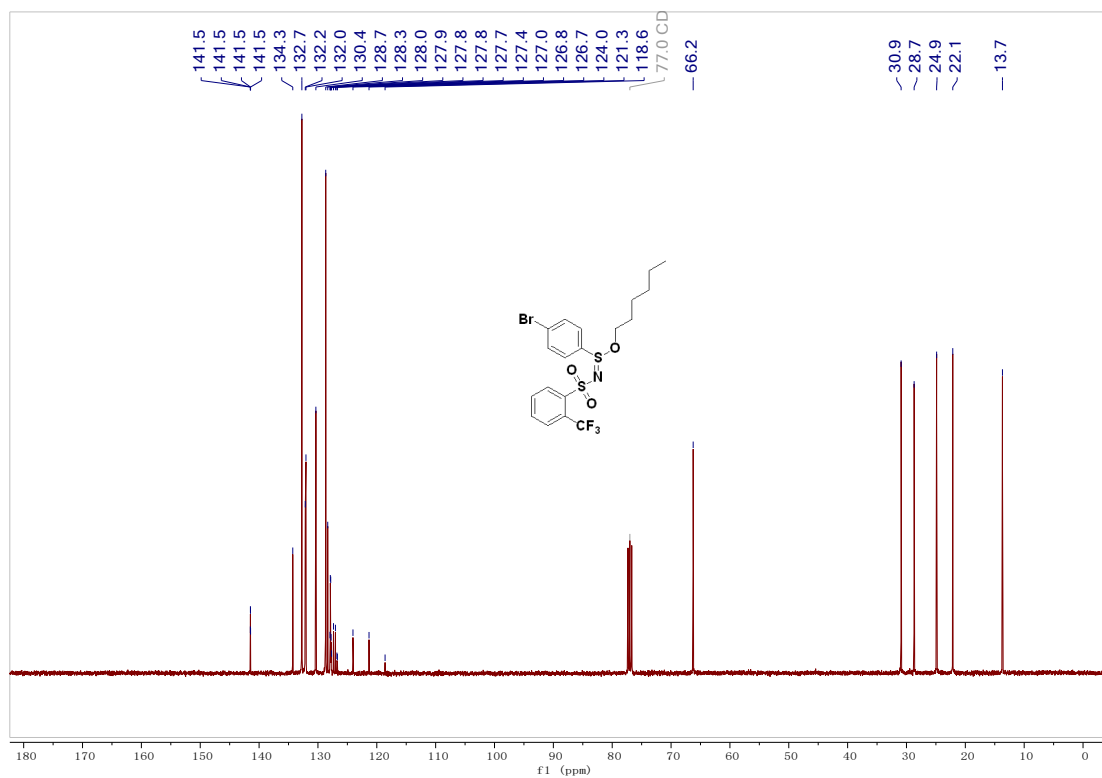



**<sup>19</sup>F NMR (376 MHz, Chloroform-*d*) of compound 4o**

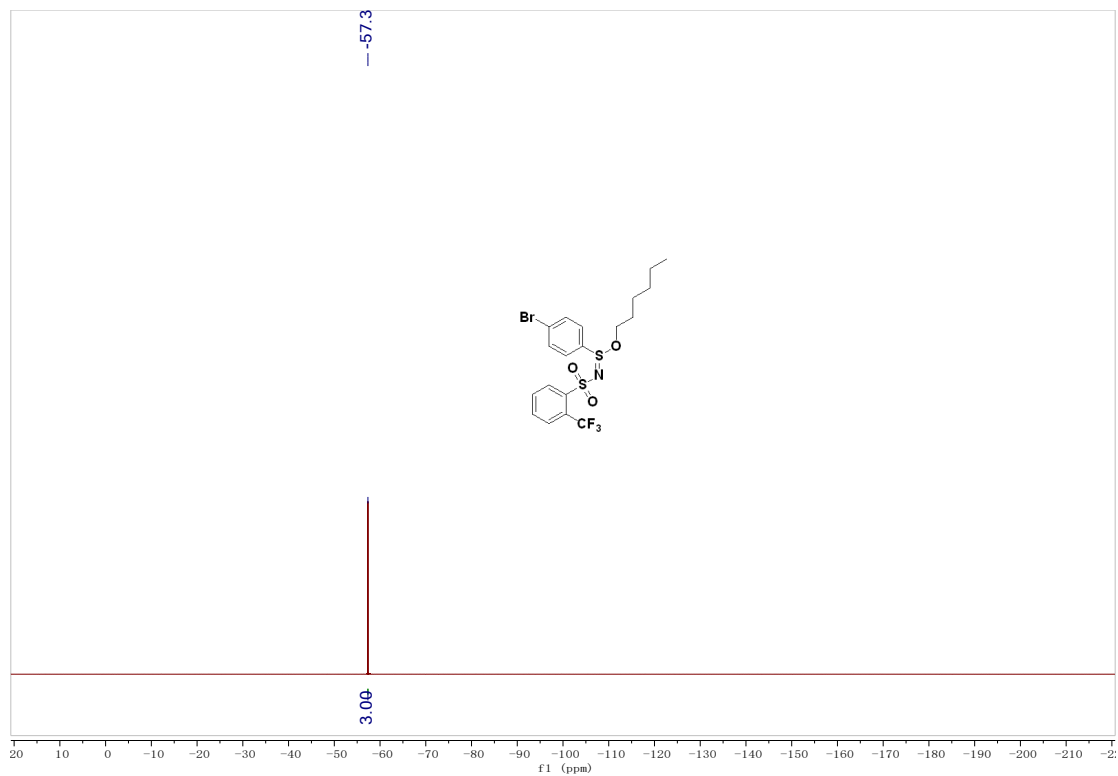

**<sup>1</sup>H NMR (400 MHz, Chloroform-*d*) of compound 4p**

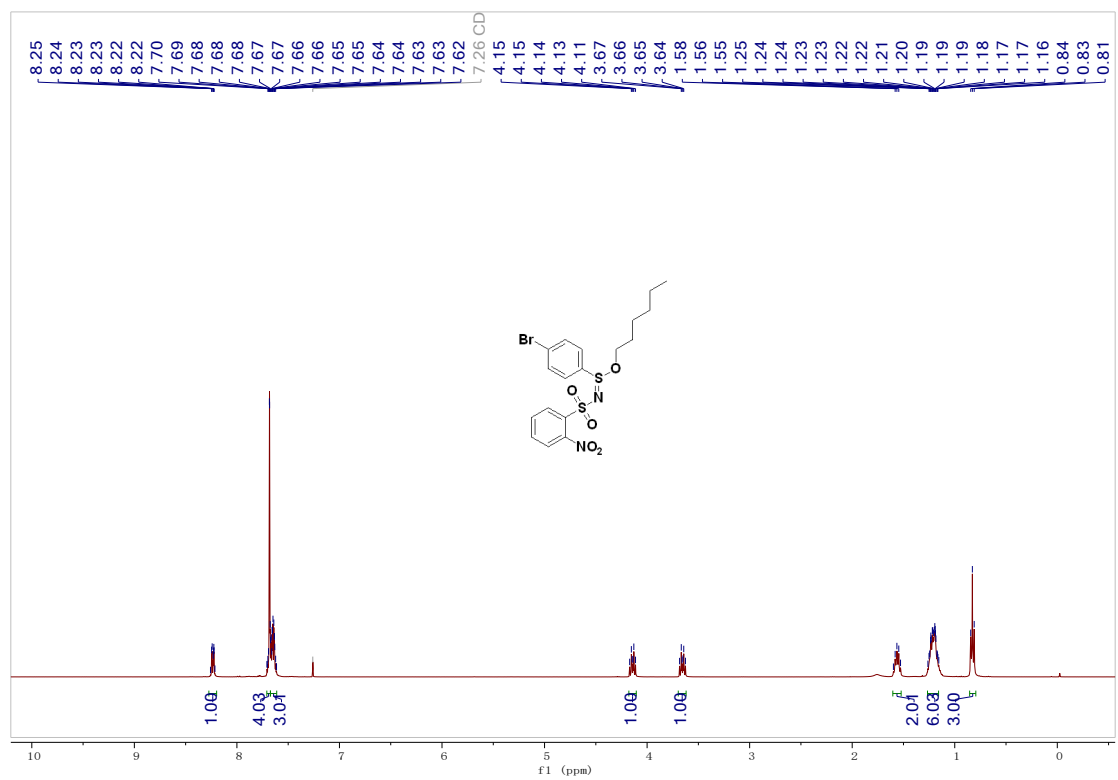

<sup>13</sup>C NMR (100 MHz, Chloroform-*d*) of compound **4p**

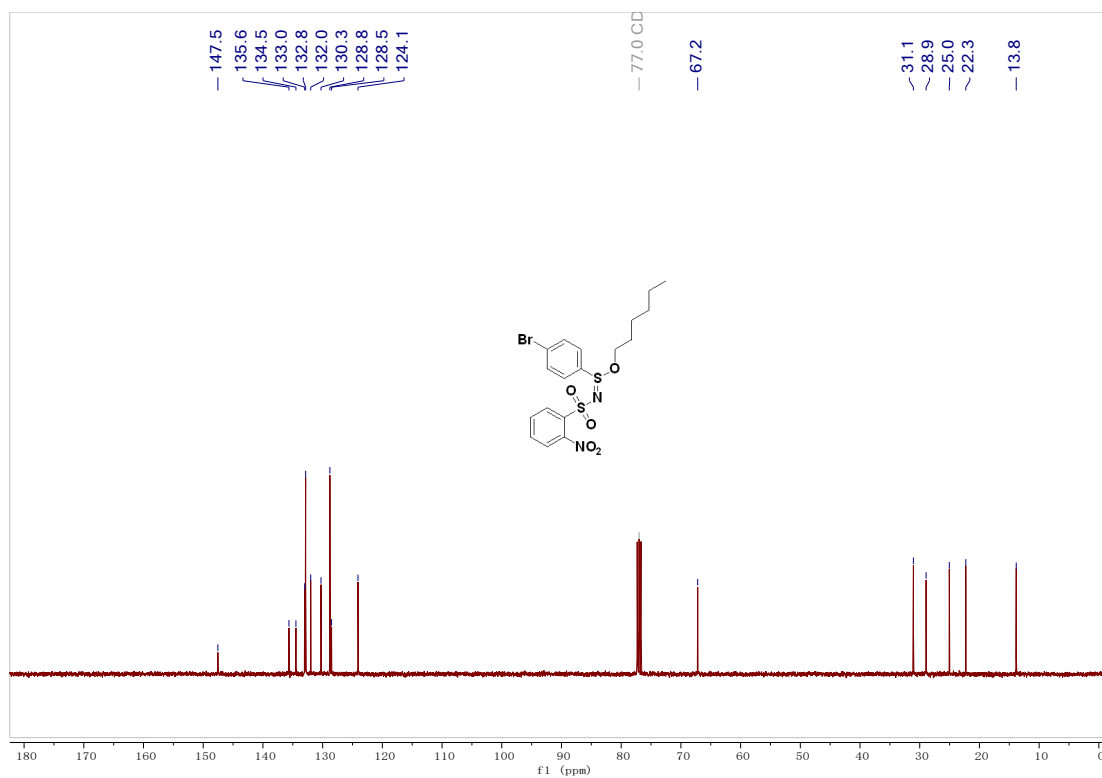

<sup>1</sup>H NMR (400 MHz, Chloroform-*d*) of compound **4q**

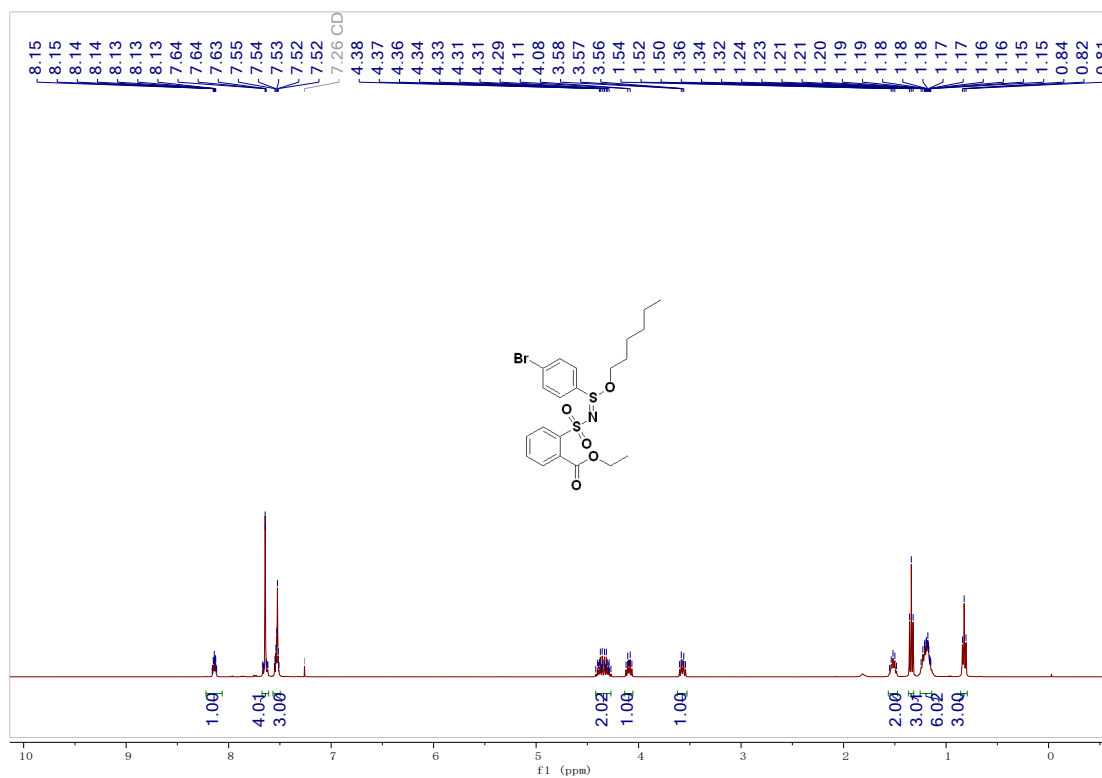

<sup>13</sup>C NMR (100 MHz, Chloroform-*d*) of compound **4q**

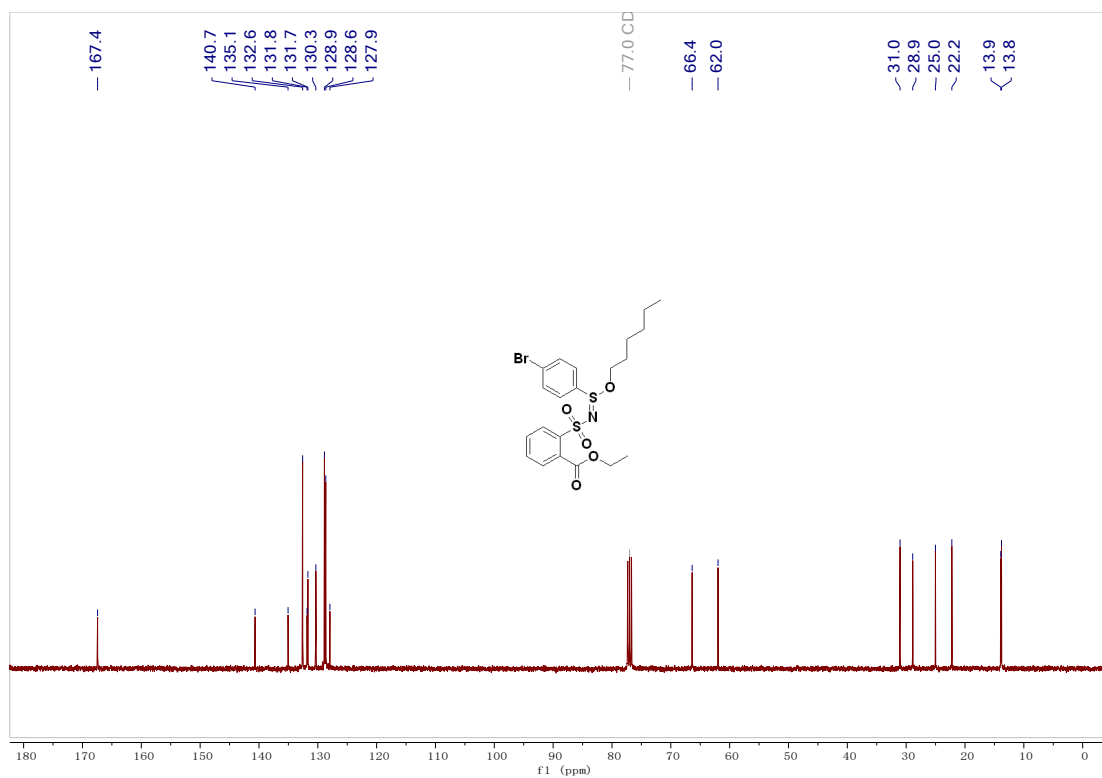

<sup>1</sup>H NMR (400 MHz, Chloroform-*d*) of compound **4r**

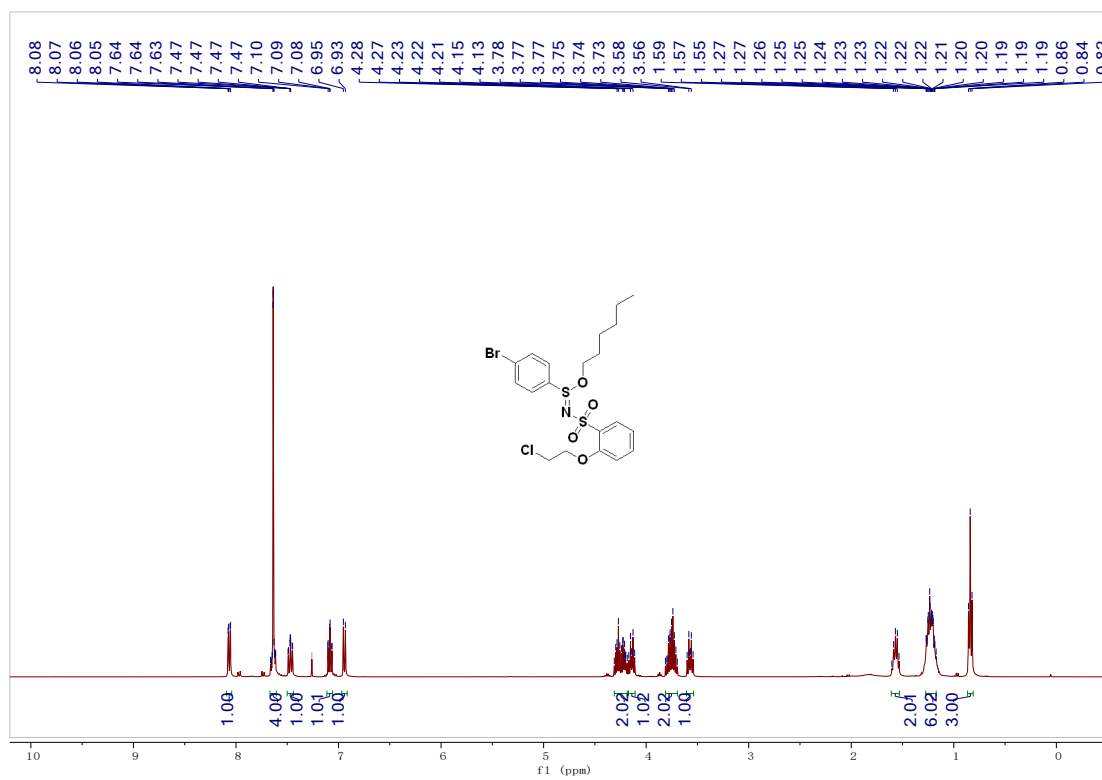

<sup>13</sup>C NMR (100 MHz, Chloroform-*d*) of compound **4r**

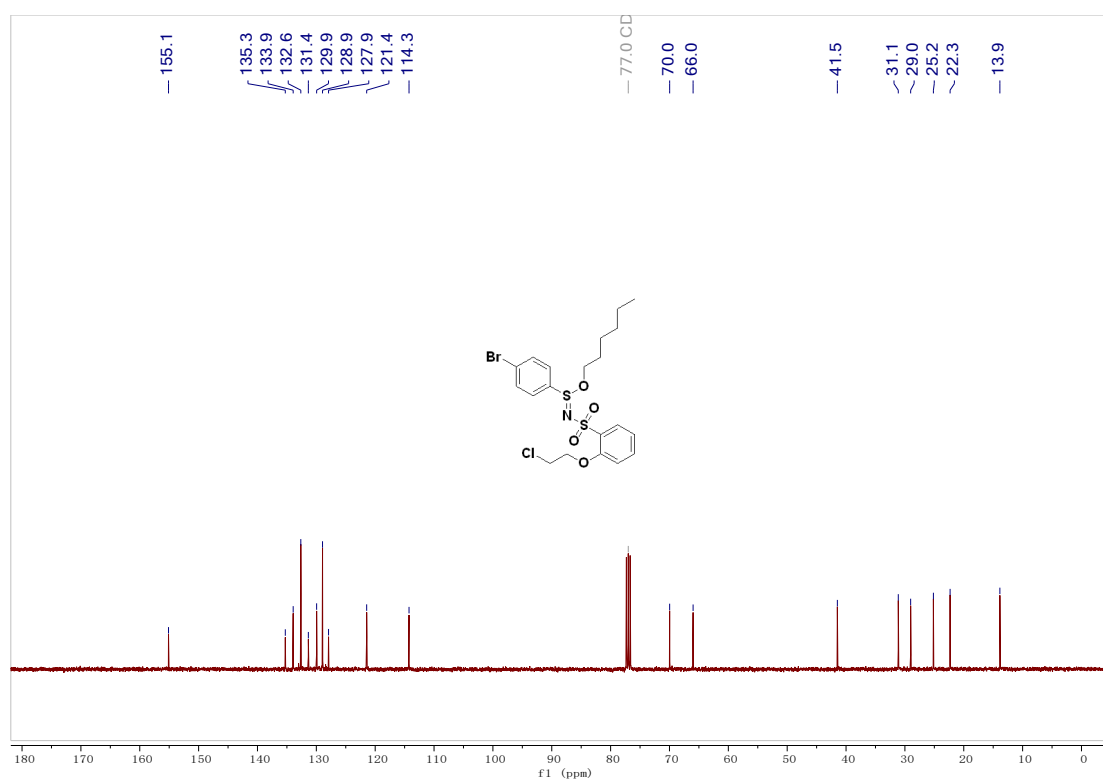

<sup>1</sup>H NMR (400 MHz, Chloroform-*d*) of compound **4s**

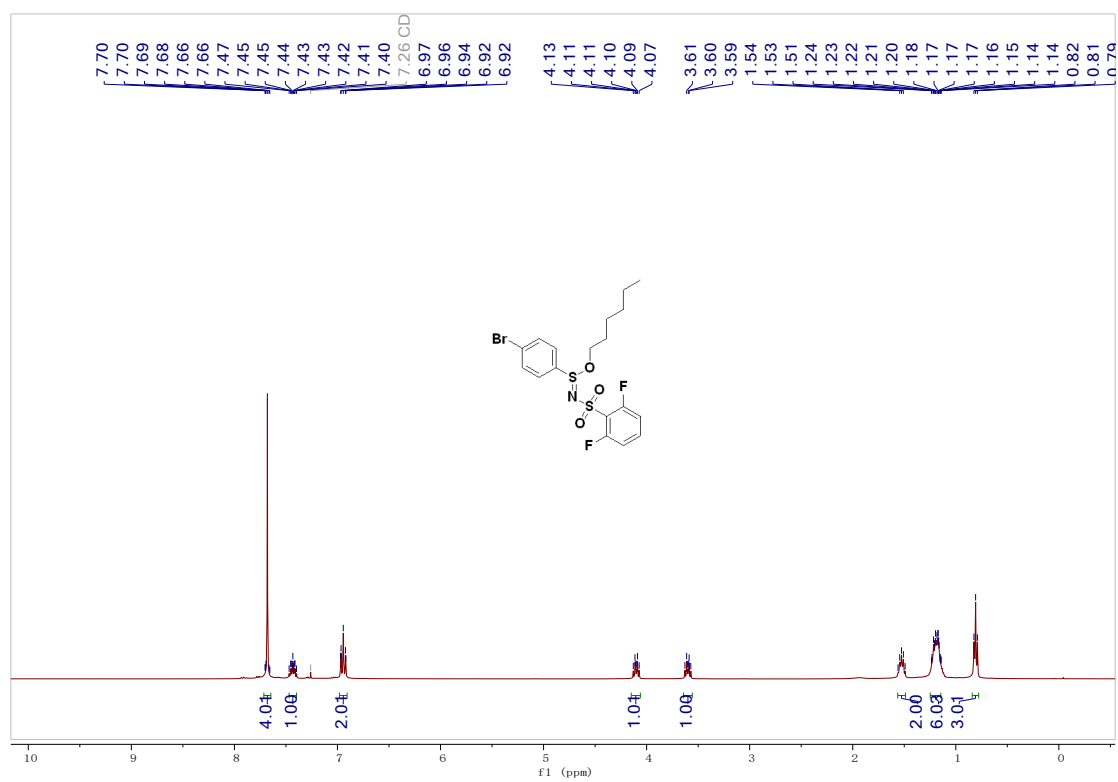

<sup>13</sup>C NMR (100 MHz, Chloroform-*d*) of compound **4s**

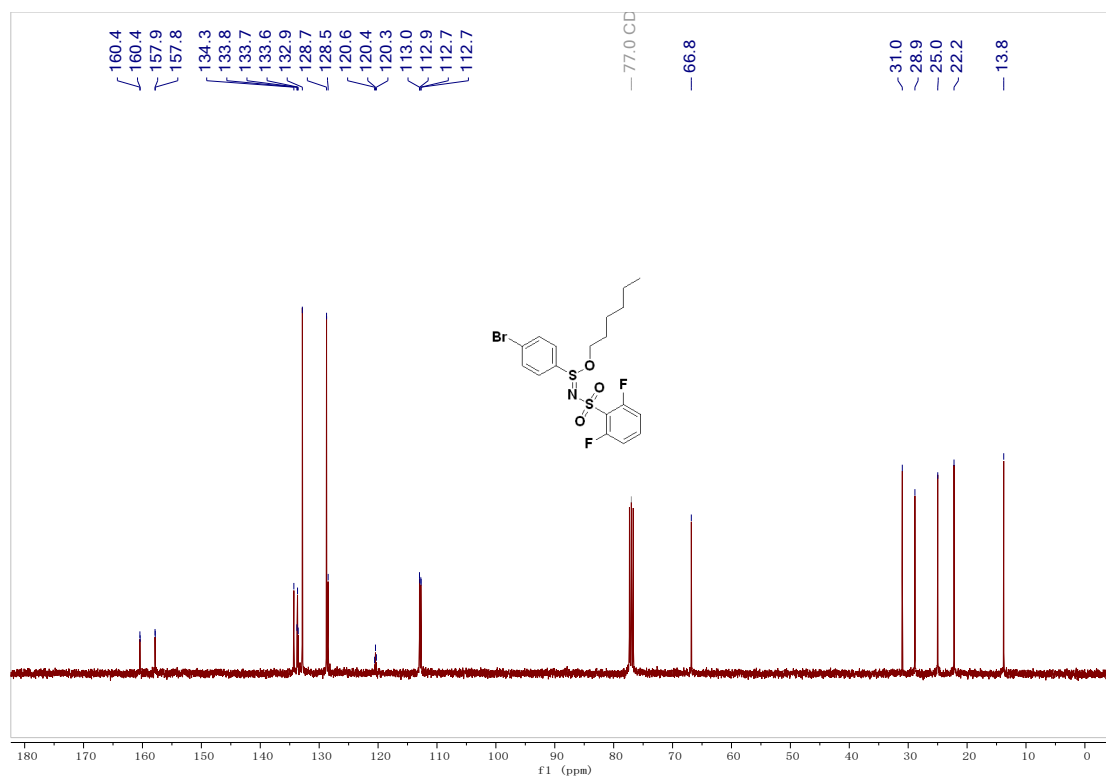

<sup>19</sup>F NMR (376 MHz, Chloroform-*d*) of compound **4s**

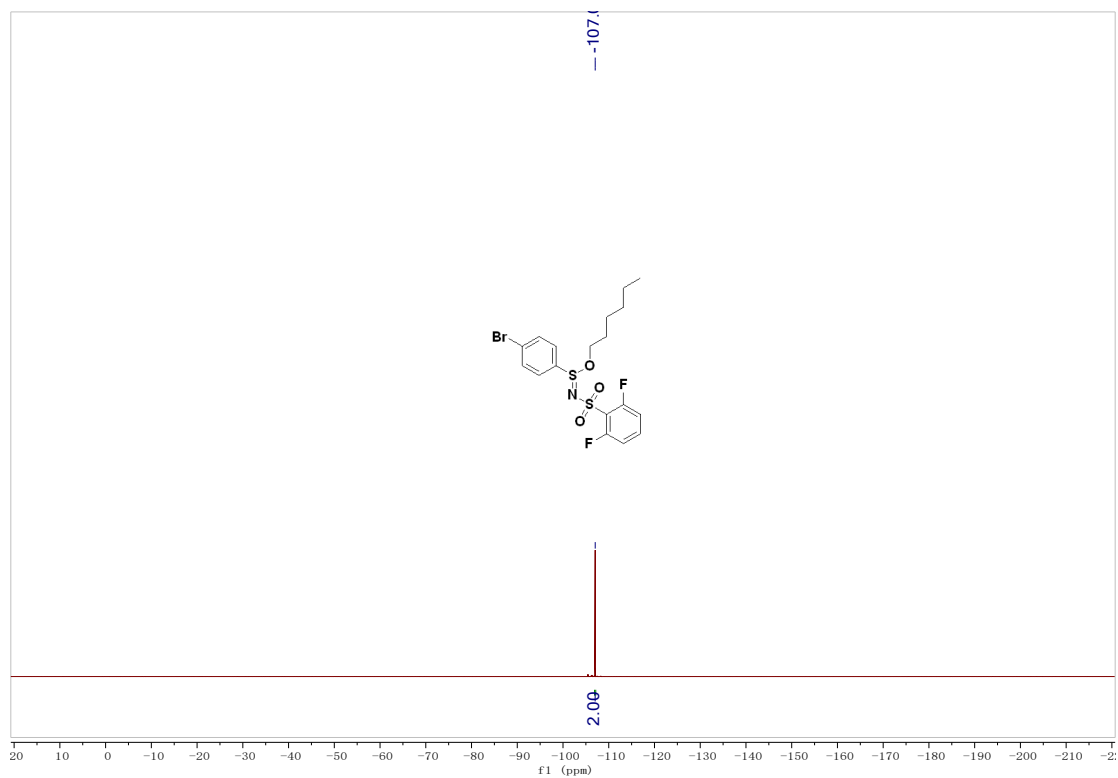

**<sup>1</sup>H NMR (400 MHz, Chloroform-*d*) of compound 4t**

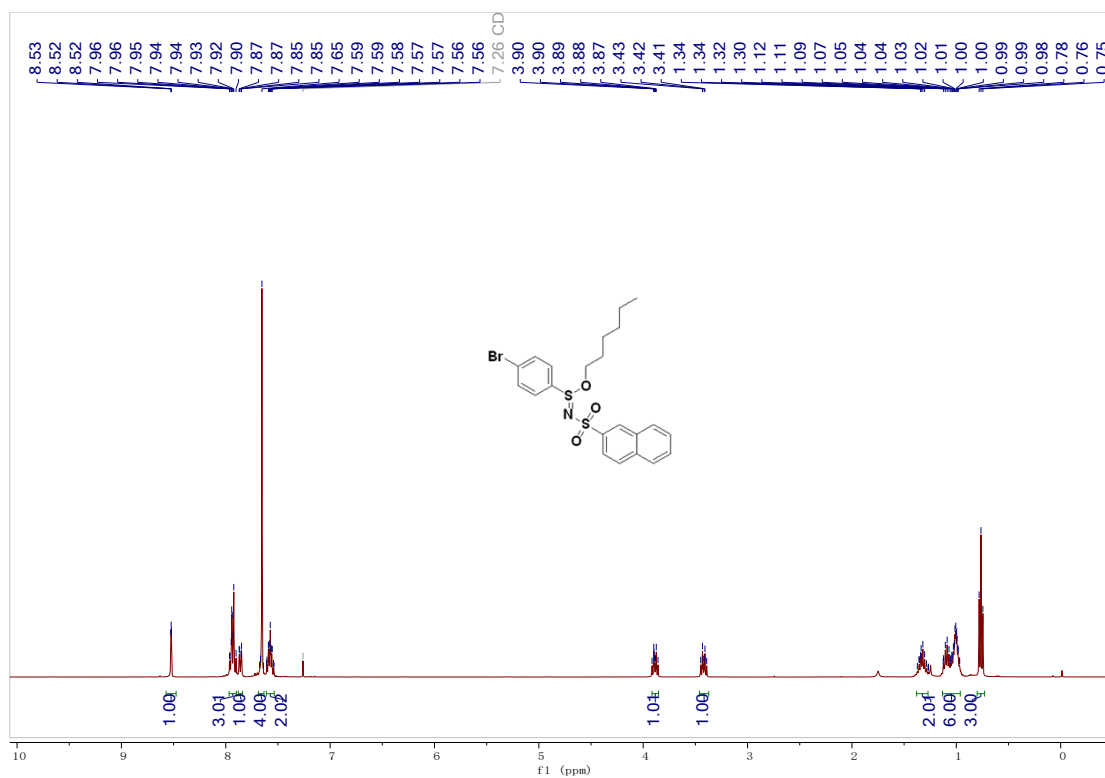

**<sup>13</sup>C NMR (100 MHz, Chloroform-*d*) of compound 4t**

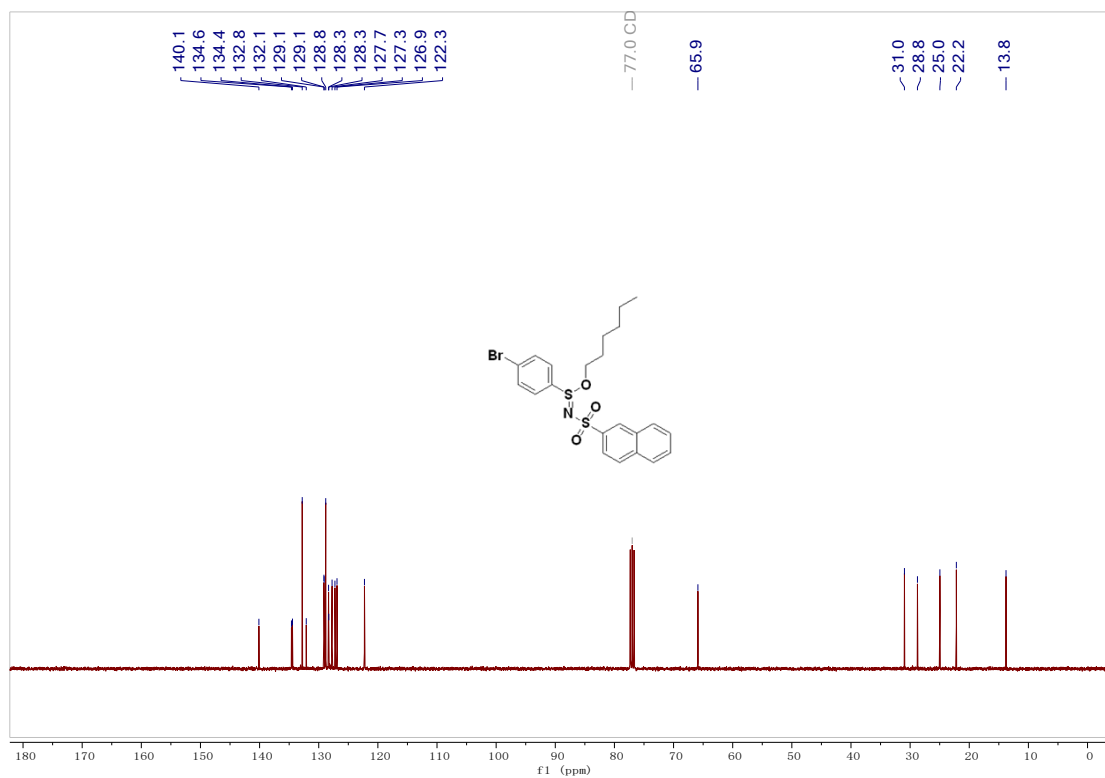

<sup>1</sup>H NMR (400 MHz, Chloroform-*d*) of compound **4u**

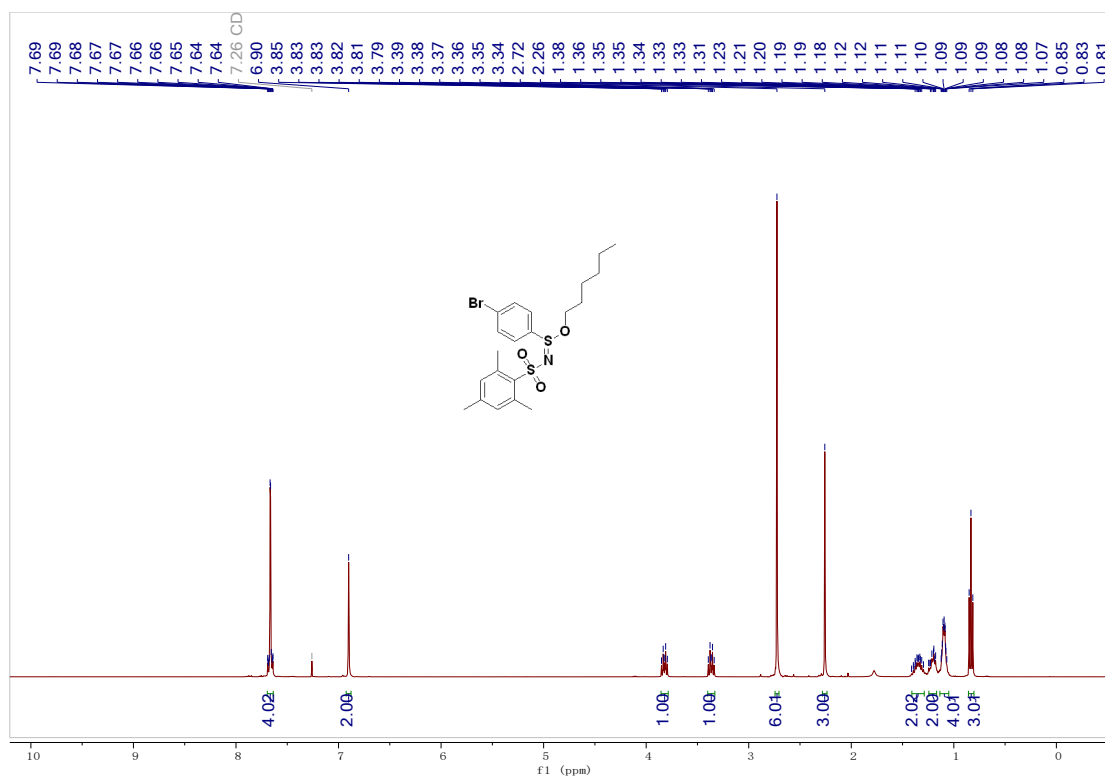

<sup>13</sup>C NMR (100 MHz, Chloroform-*d*) of compound **4u**

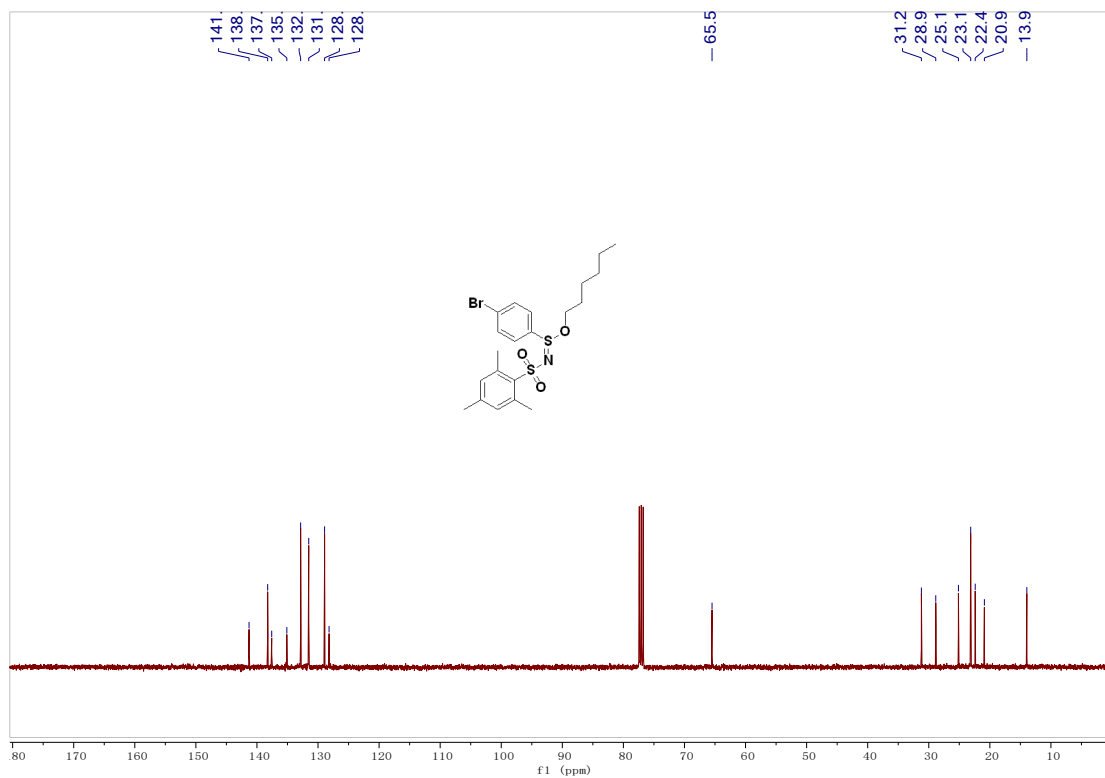

<sup>1</sup>H NMR (400 MHz, Chloroform-*d*) of compound 4v

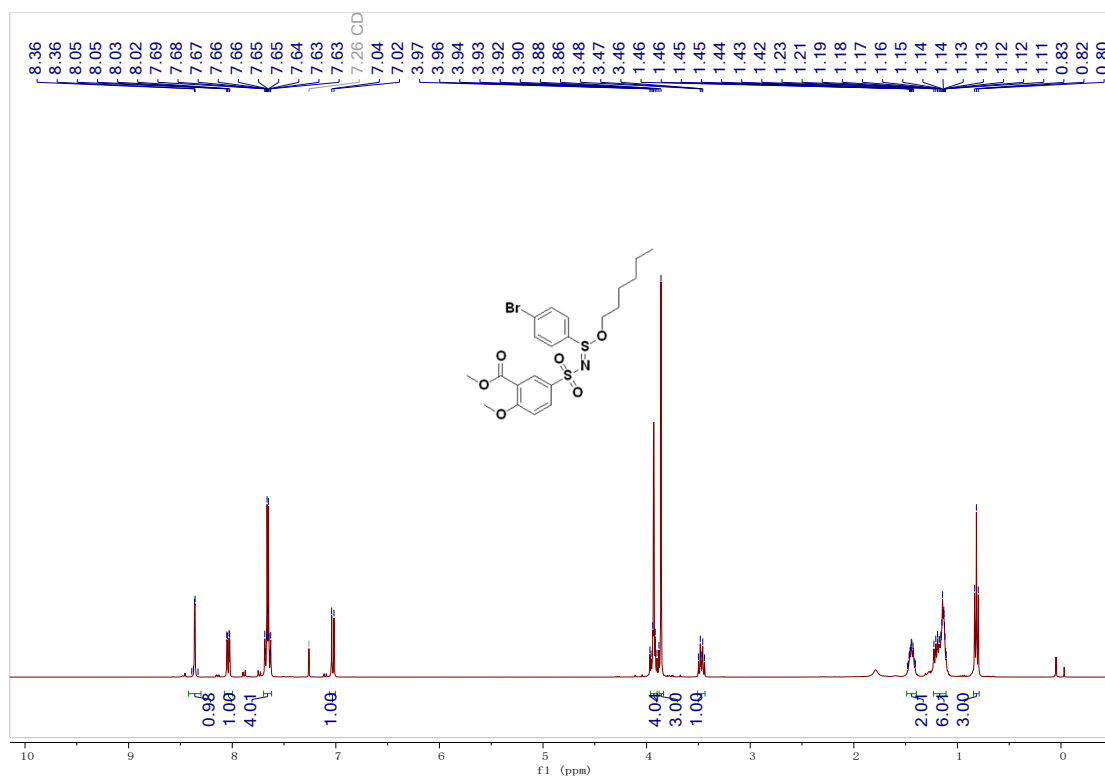

<sup>13</sup>C NMR (100 MHz, Chloroform-*d*) of compound 4v

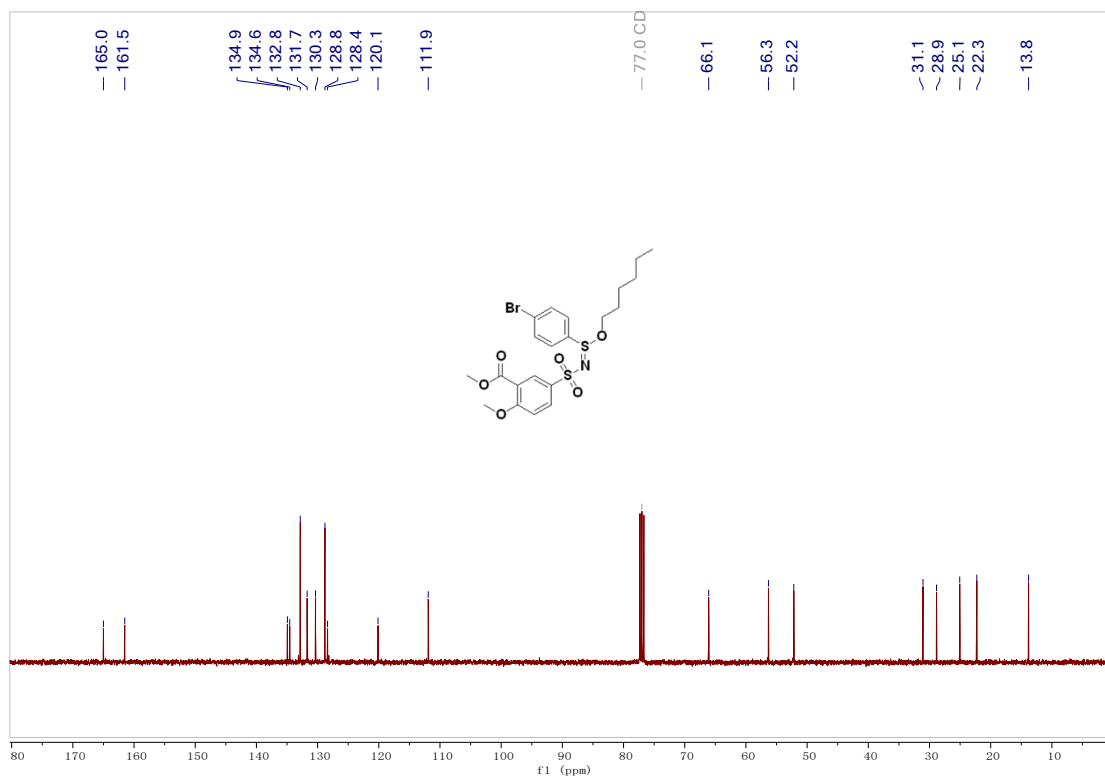



<sup>1</sup>H NMR (400 MHz, Chloroform-*d*) of compound **4w**

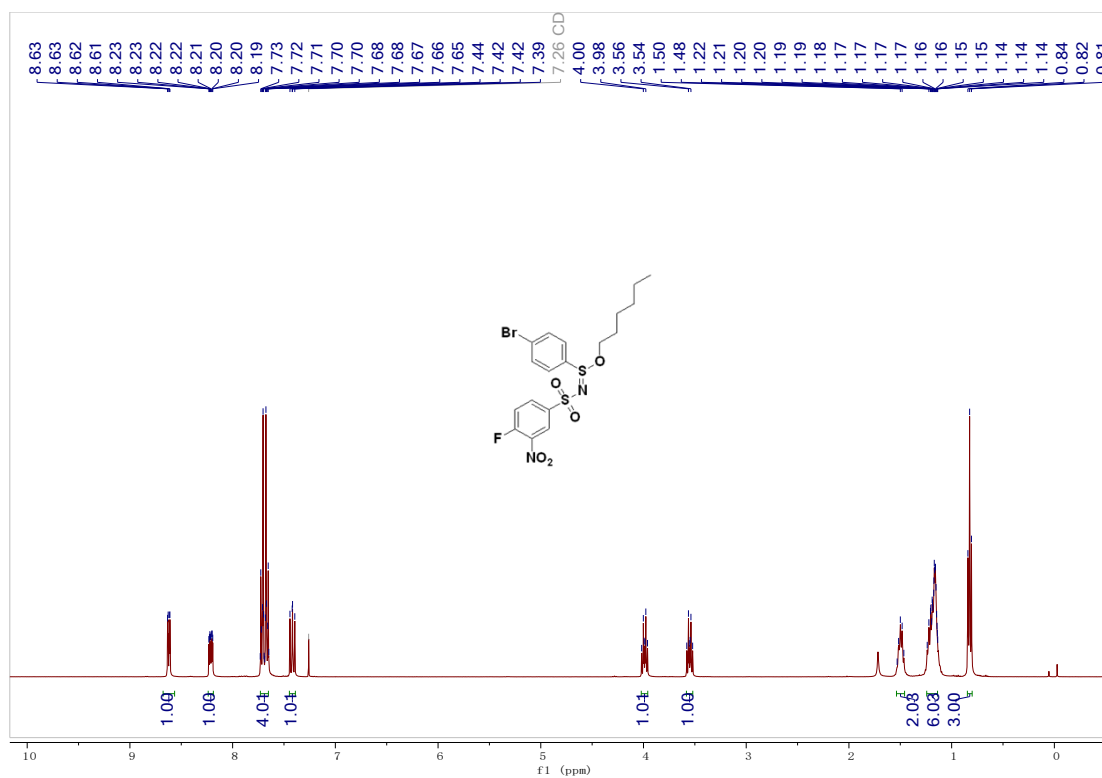

<sup>13</sup>C NMR (100 MHz, Chloroform-*d*) of compound **4w**

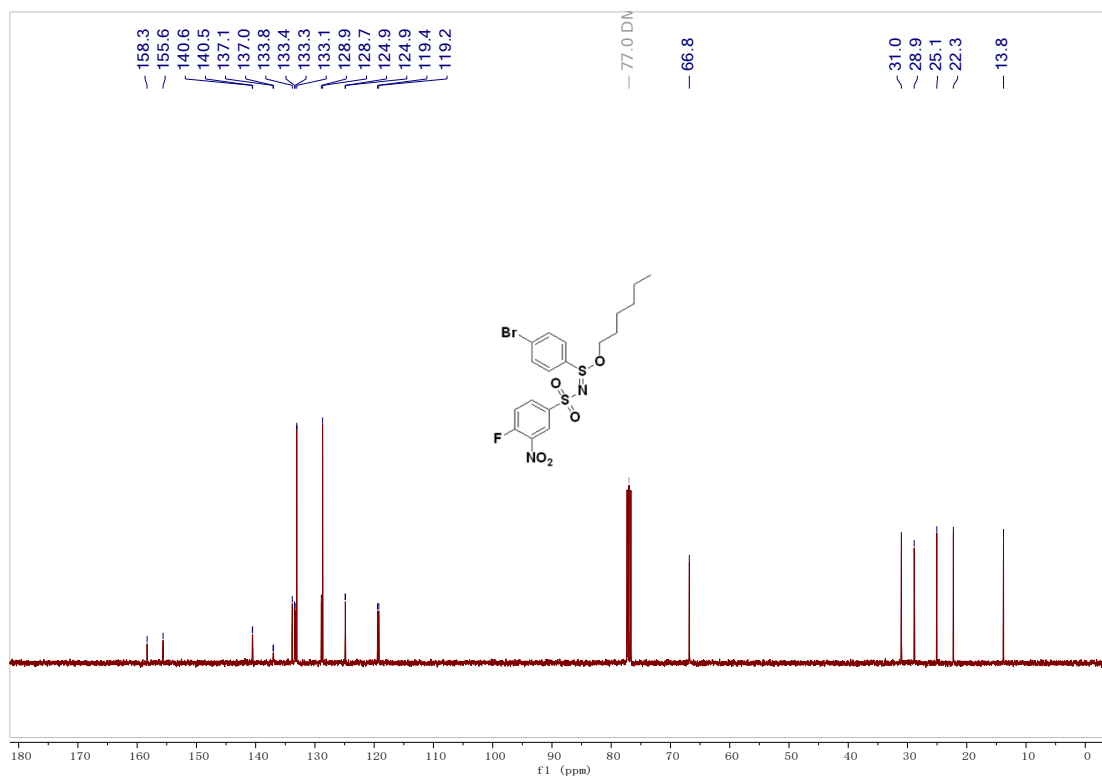

<sup>1</sup>H NMR (400 MHz, Chloroform-*d*) of compound 4x

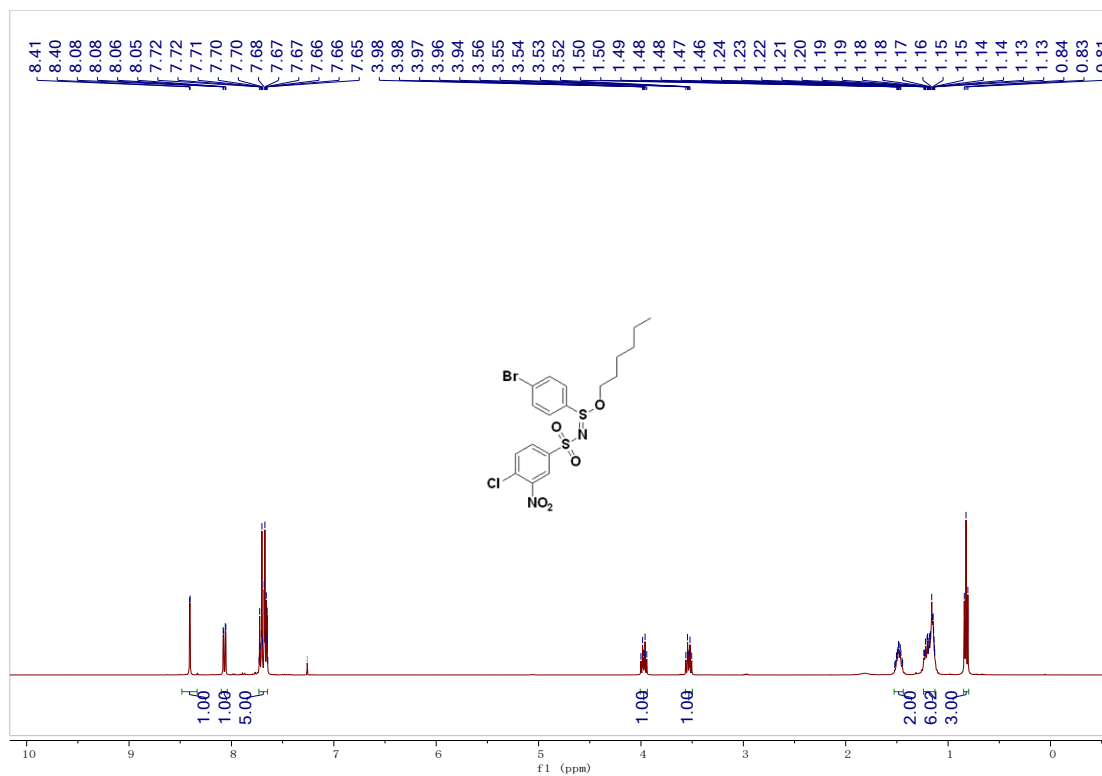

<sup>13</sup>C NMR (100 MHz, Chloroform-*d*) of compound 4x

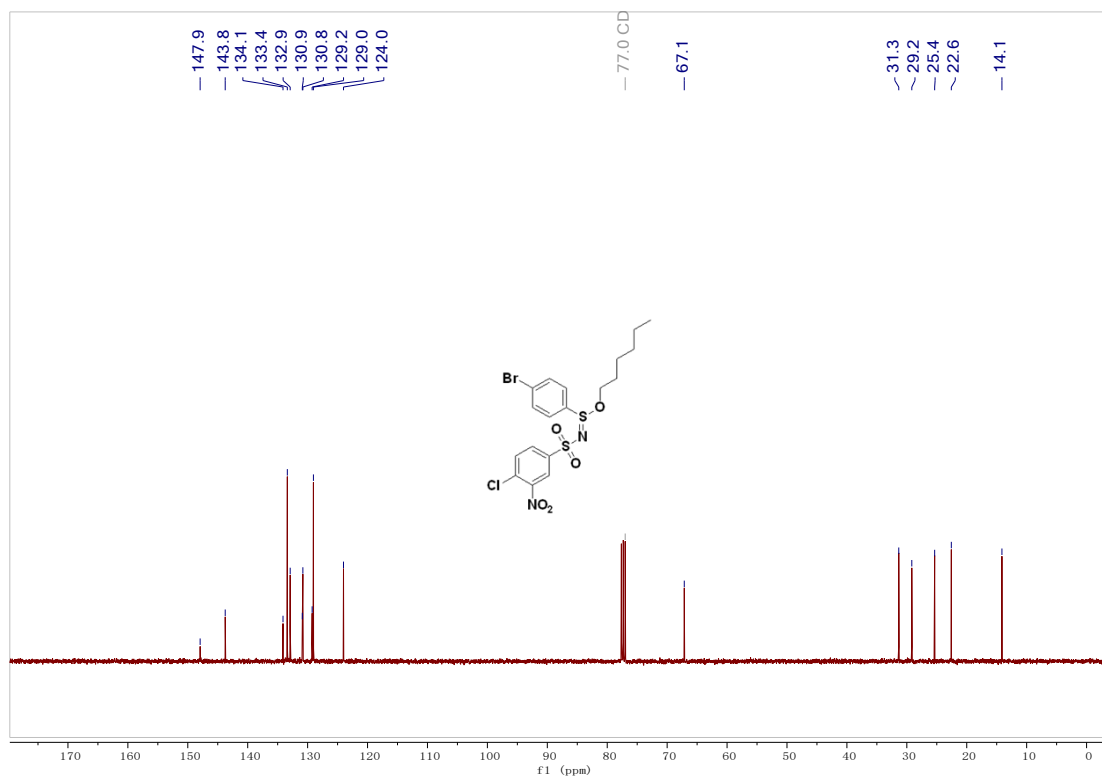

**<sup>1</sup>H NMR (400 MHz, Chloroform-*d*) of compound 4y**

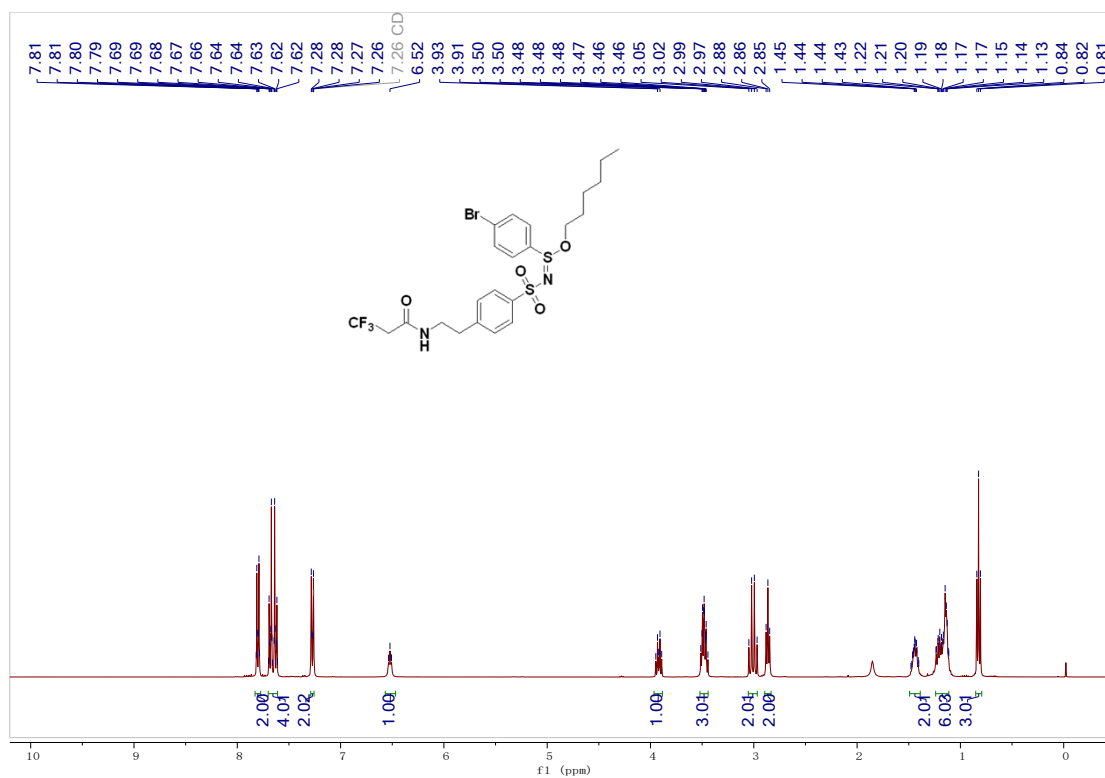

**<sup>13</sup>C NMR (100 MHz, Chloroform-*d*) of compound 4y**

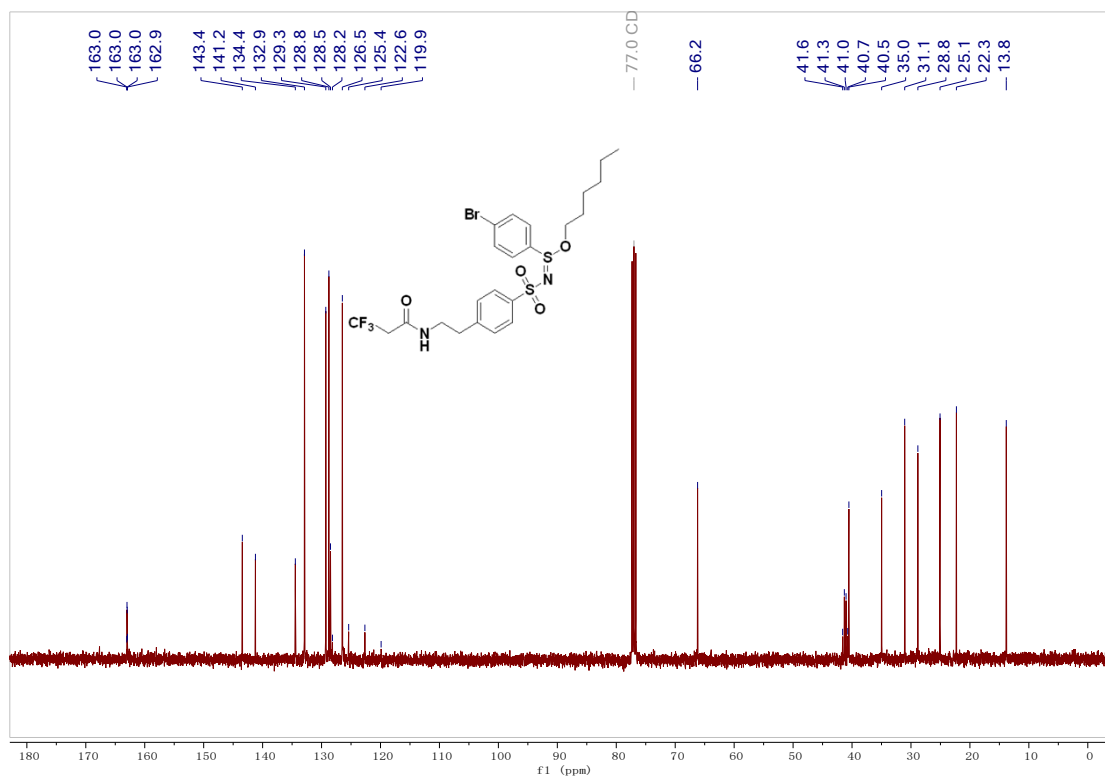

**<sup>19</sup>F NMR (376 MHz, Chloroform-d) of compound 4y**

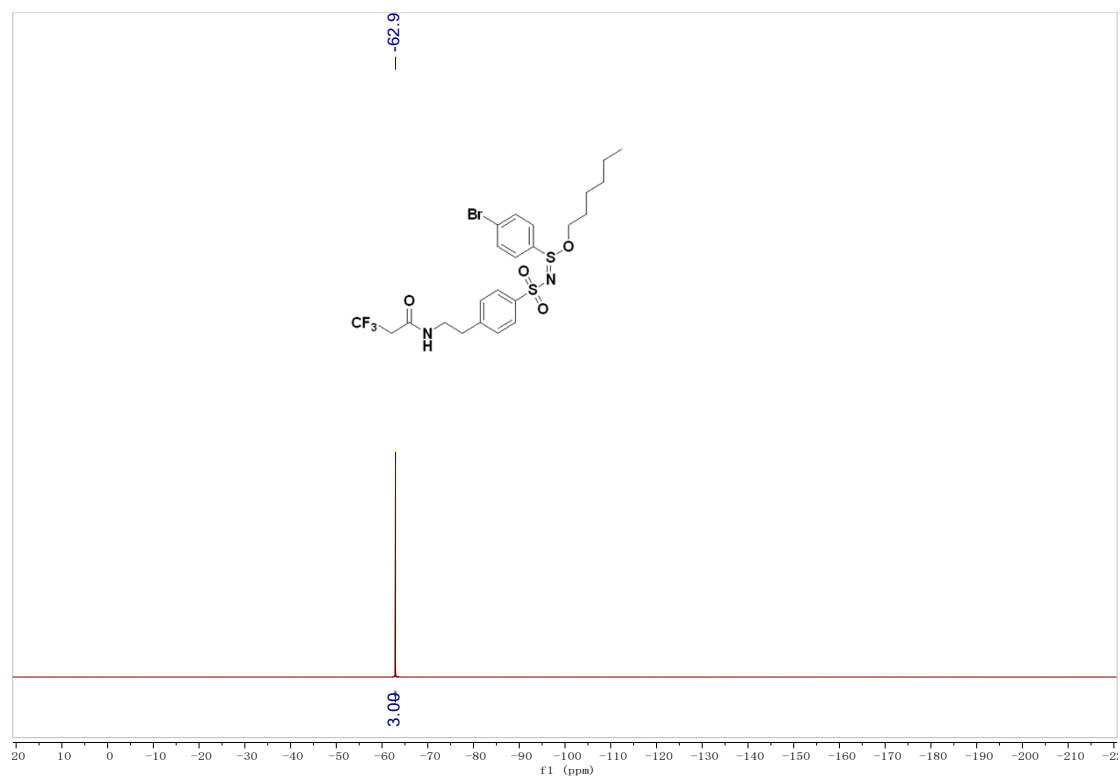

**<sup>1</sup>H NMR (400 MHz, Chloroform-d) of compound 4z**

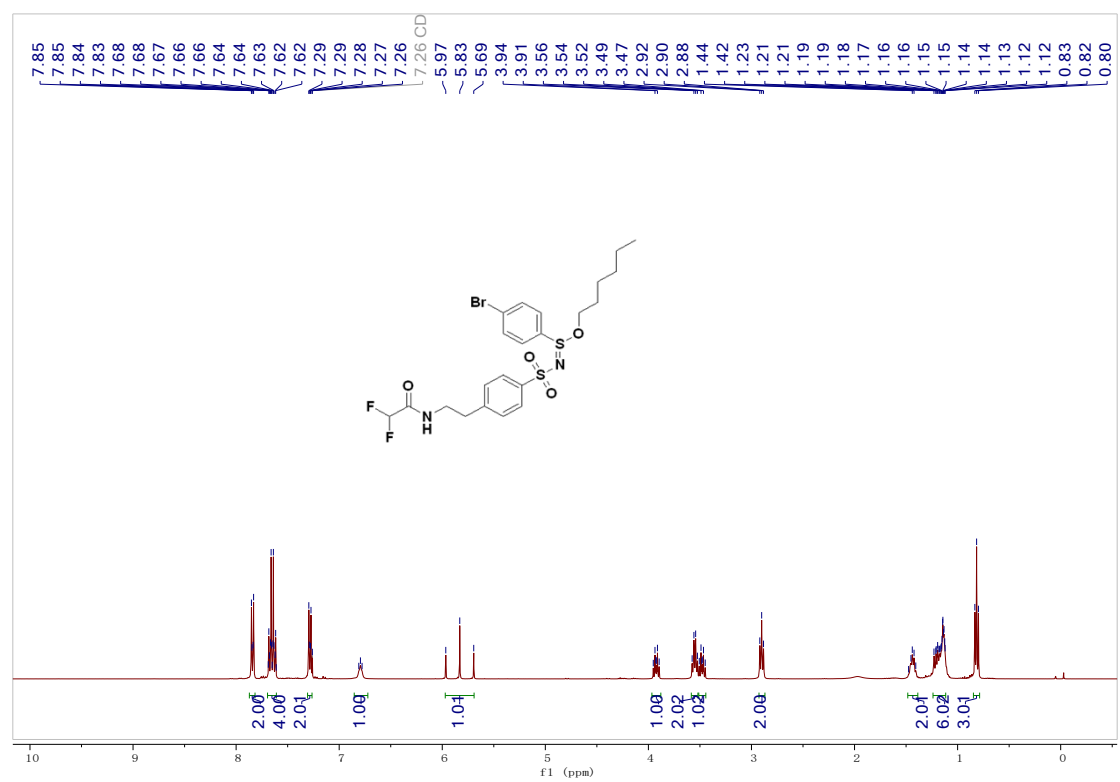

<sup>13</sup>C NMR (100 MHz, Chloroform-*d*) of compound **4z**

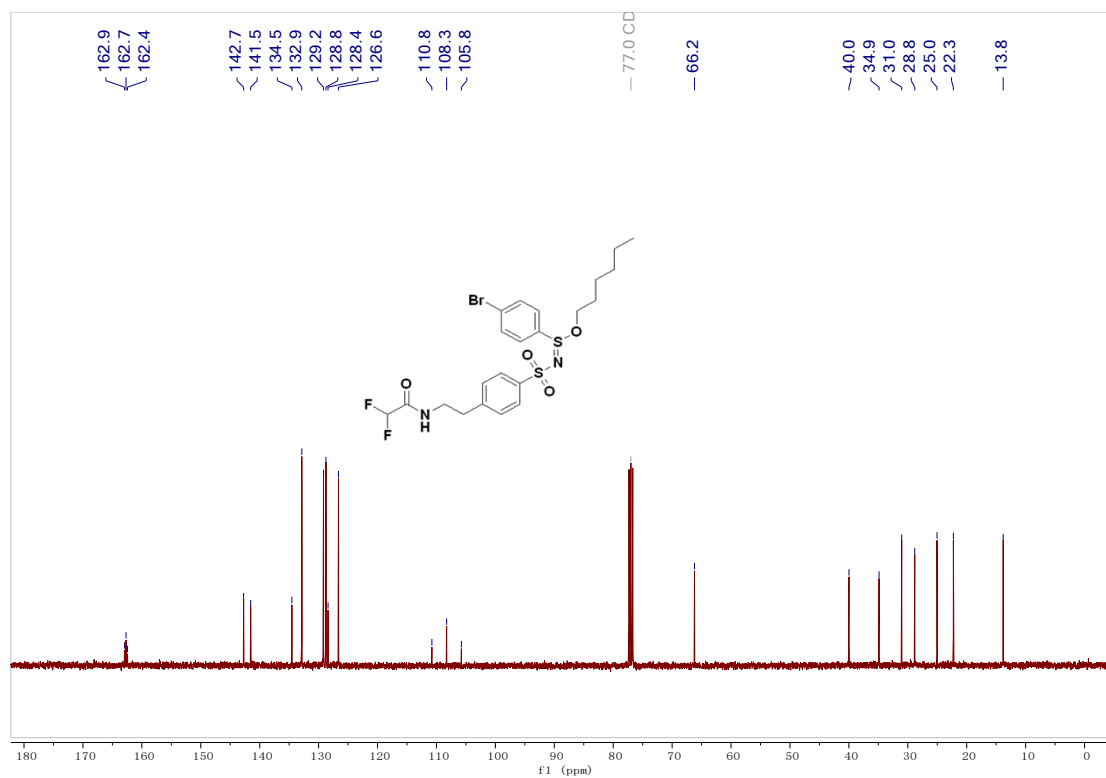

<sup>19</sup>F NMR (376 MHz, Chloroform-*d*) of compound **4z**

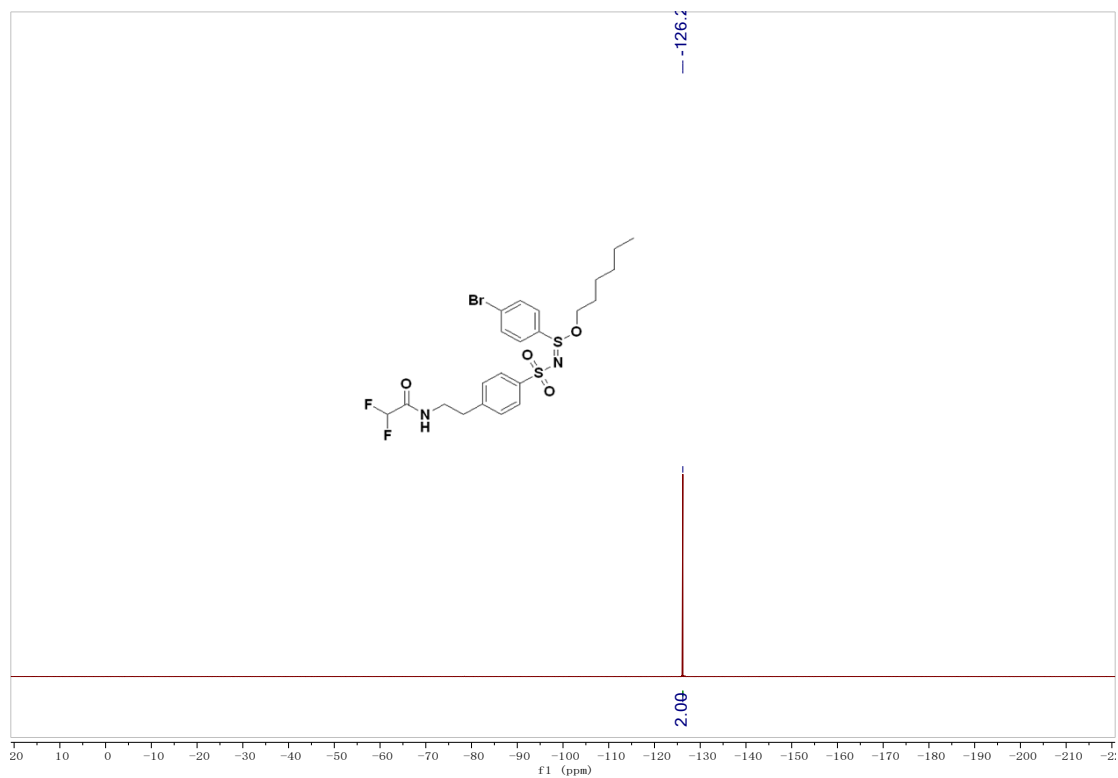

**<sup>1</sup>H NMR (400 MHz, Chloroform-*d*) of compound 4aa**

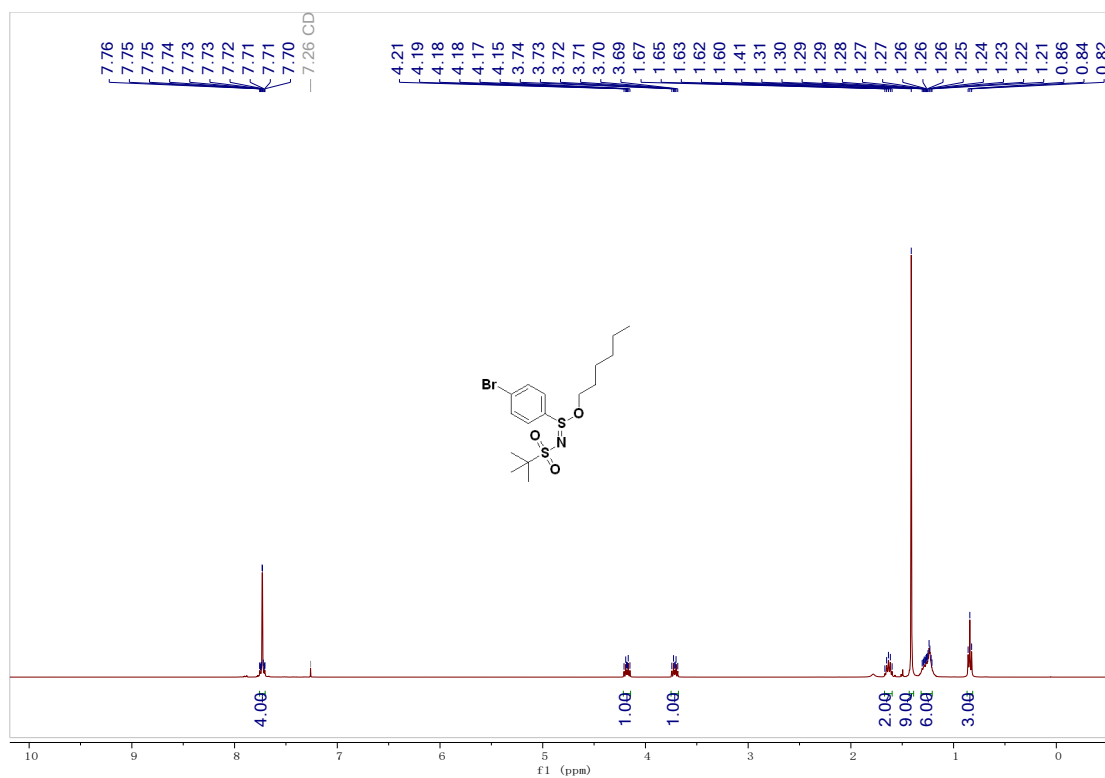

**<sup>13</sup>C NMR (100 MHz, Chloroform-*d*) of compound 4aa**

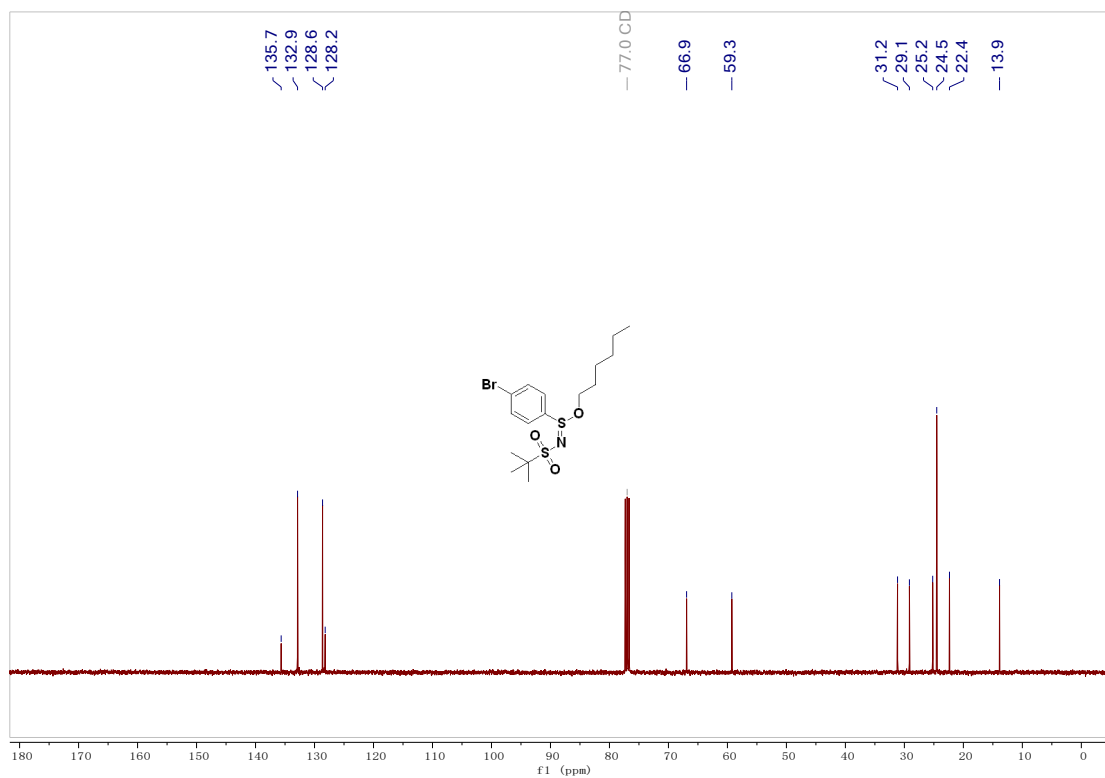

**<sup>1</sup>H NMR (400 MHz, Chloroform-*d*) of compound 4ab**

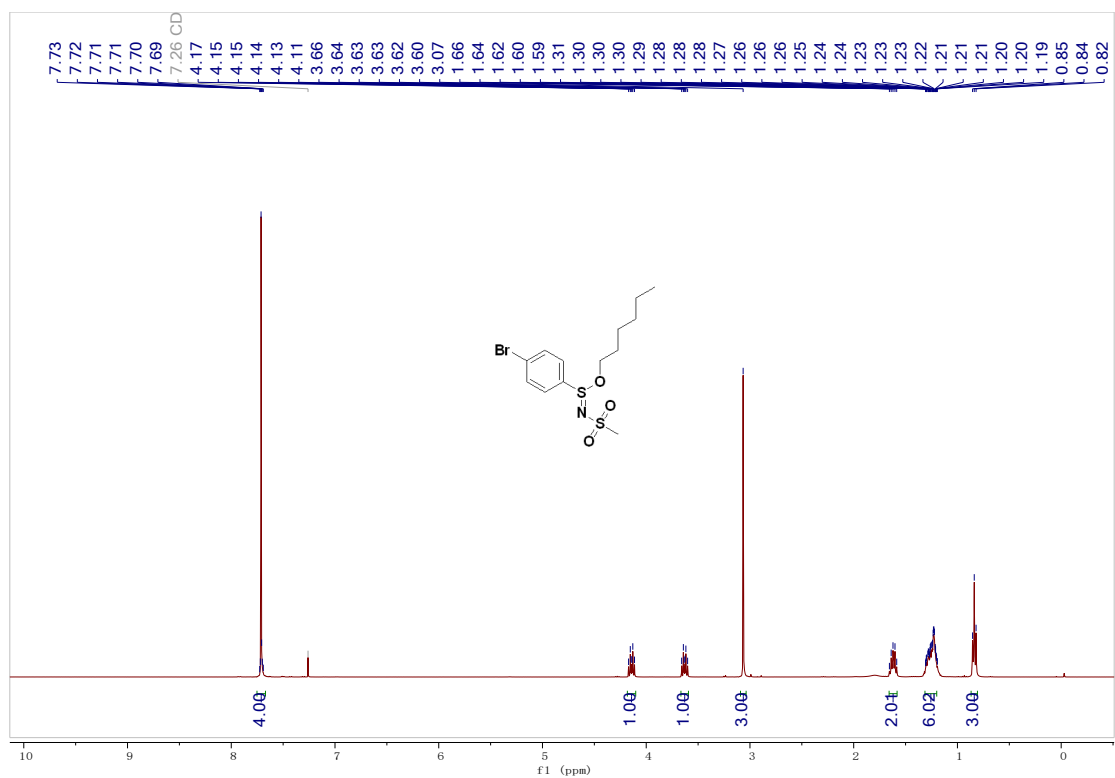

**<sup>13</sup>C NMR (100 MHz, Chloroform-*d*) of compound 4ab**

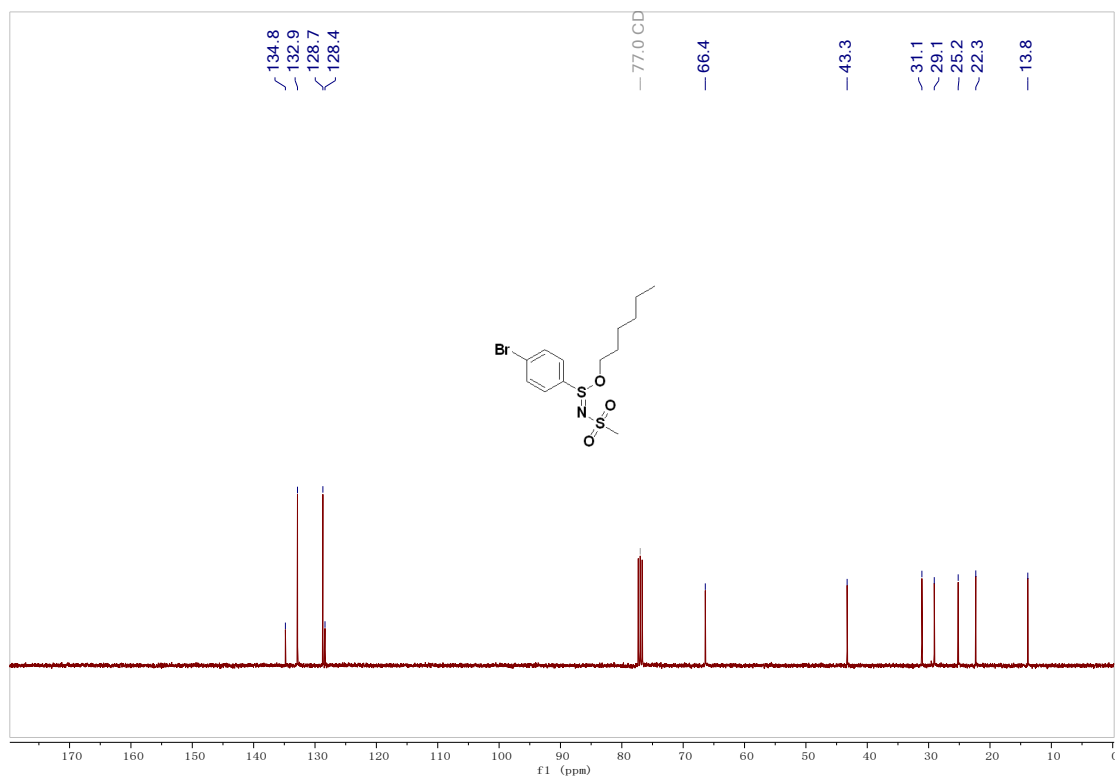

**<sup>1</sup>H NMR (400 MHz, Chloroform-*d*) of compound 4ac**

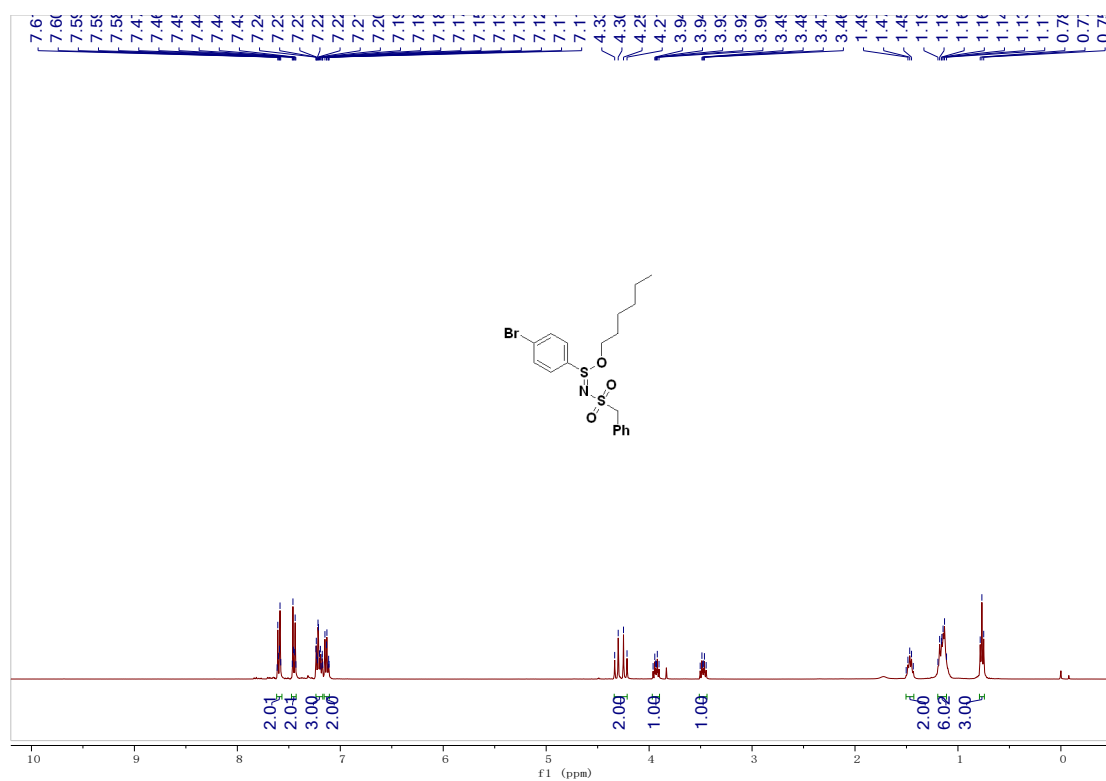

**<sup>13</sup>C NMR (100 MHz, Chloroform-*d*) of compound 4ac**

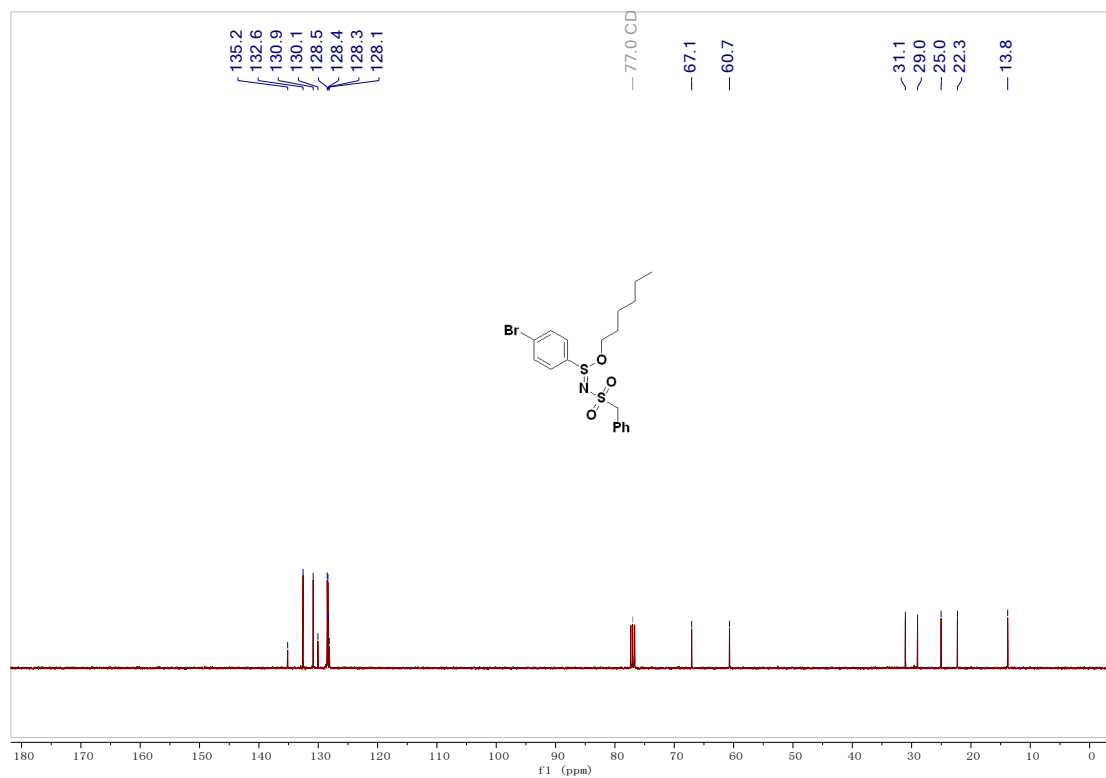



**<sup>1</sup>H NMR (400 MHz, Chloroform-*d*) of compound 4ad**

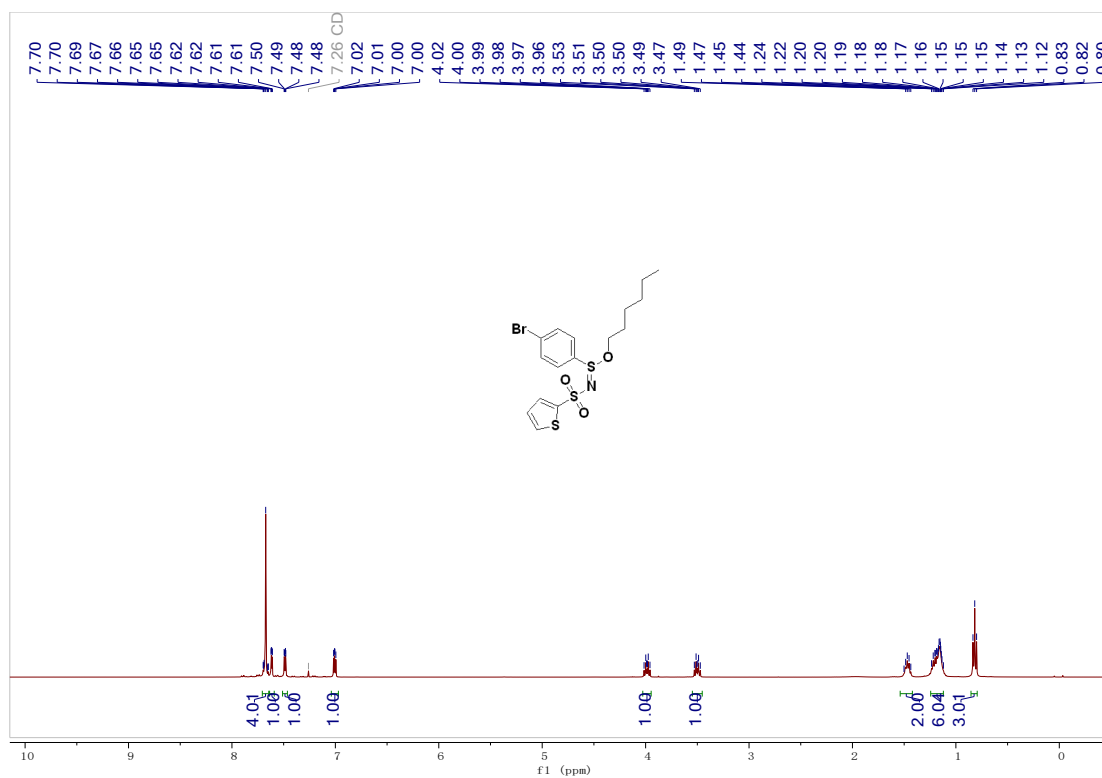

**<sup>13</sup>C NMR (100 MHz, Chloroform-*d*) of compound 4ad**

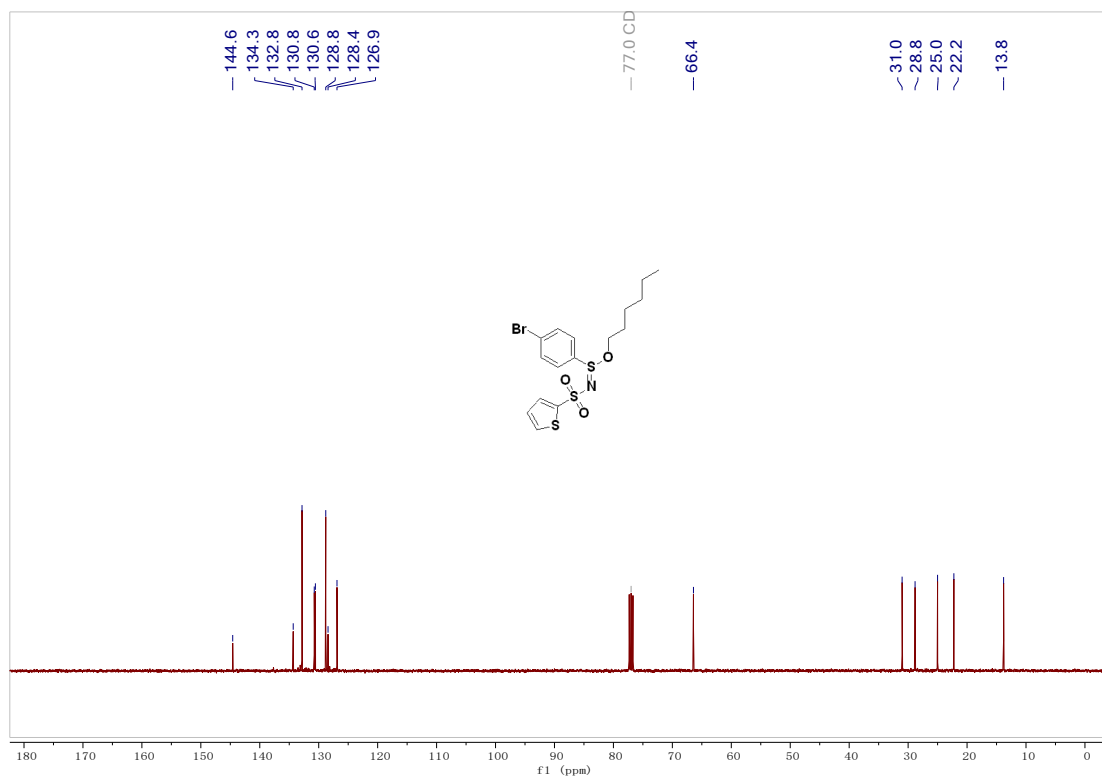

**<sup>1</sup>H NMR (400 MHz, Chloroform-*d*) of compound 4ae**

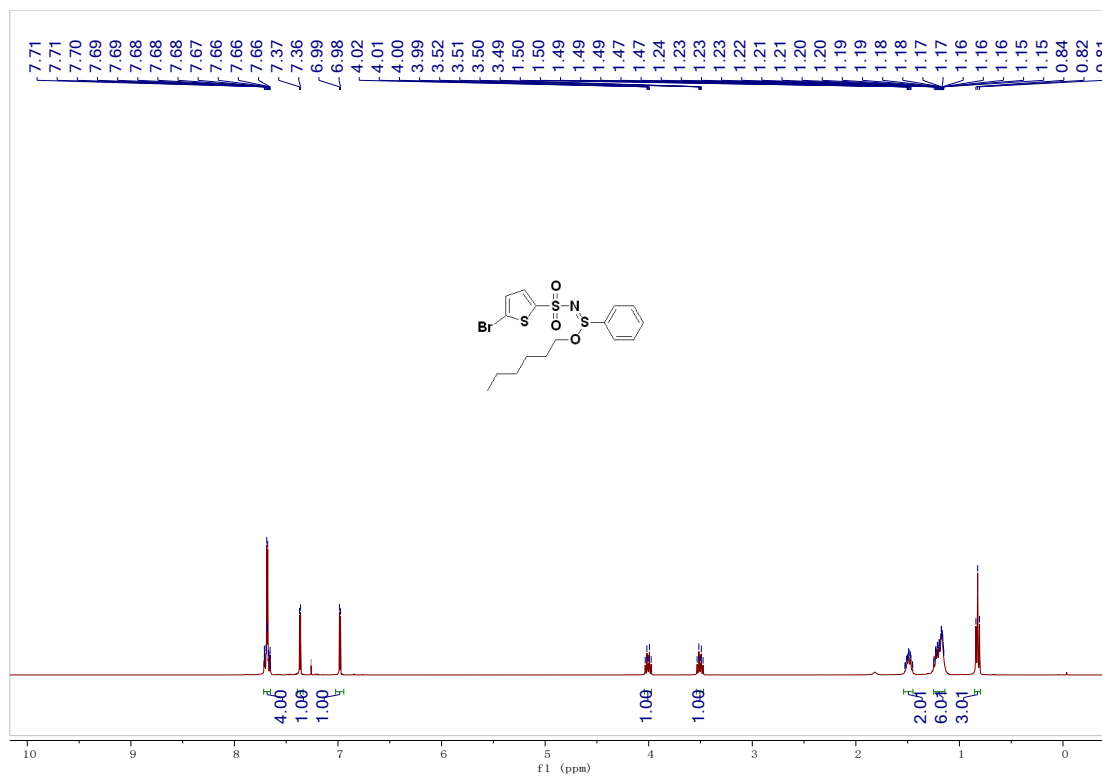

**<sup>13</sup>C NMR (100 MHz, Chloroform-*d*) of compound 4ae**

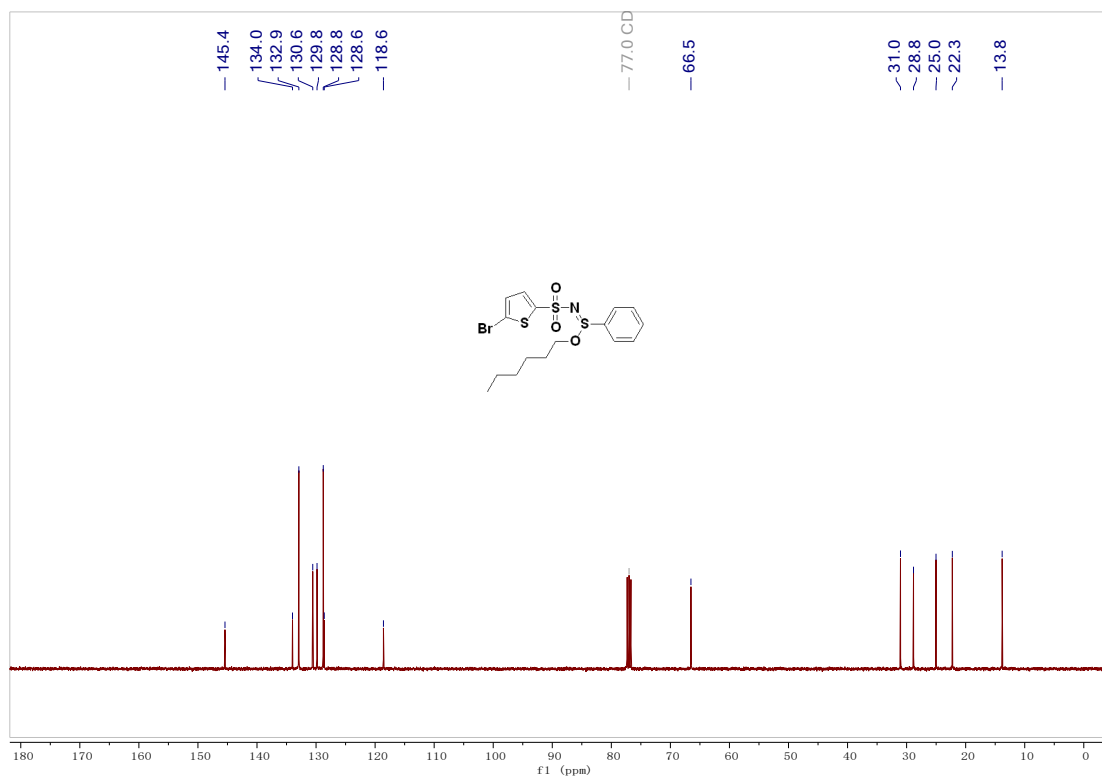

**<sup>1</sup>H NMR (400 MHz, Chloroform-*d*) of compound 4af**

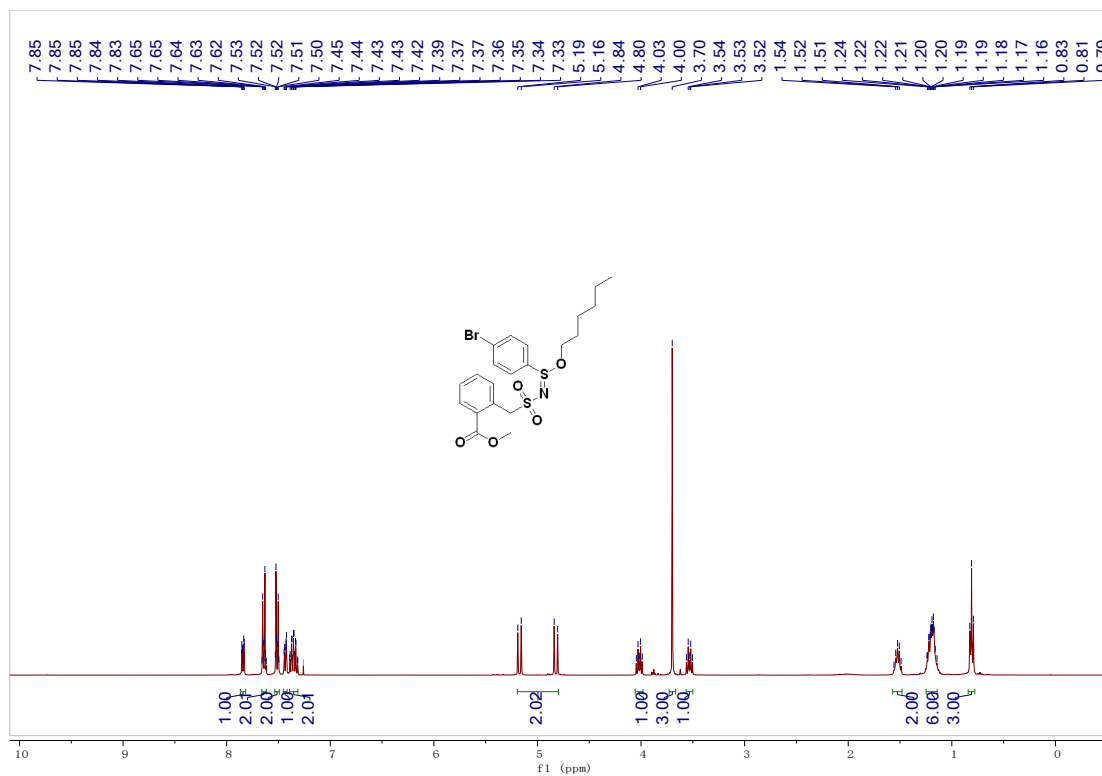

**<sup>13</sup>C NMR (100 MHz, Chloroform-*d*) of compound 4af**

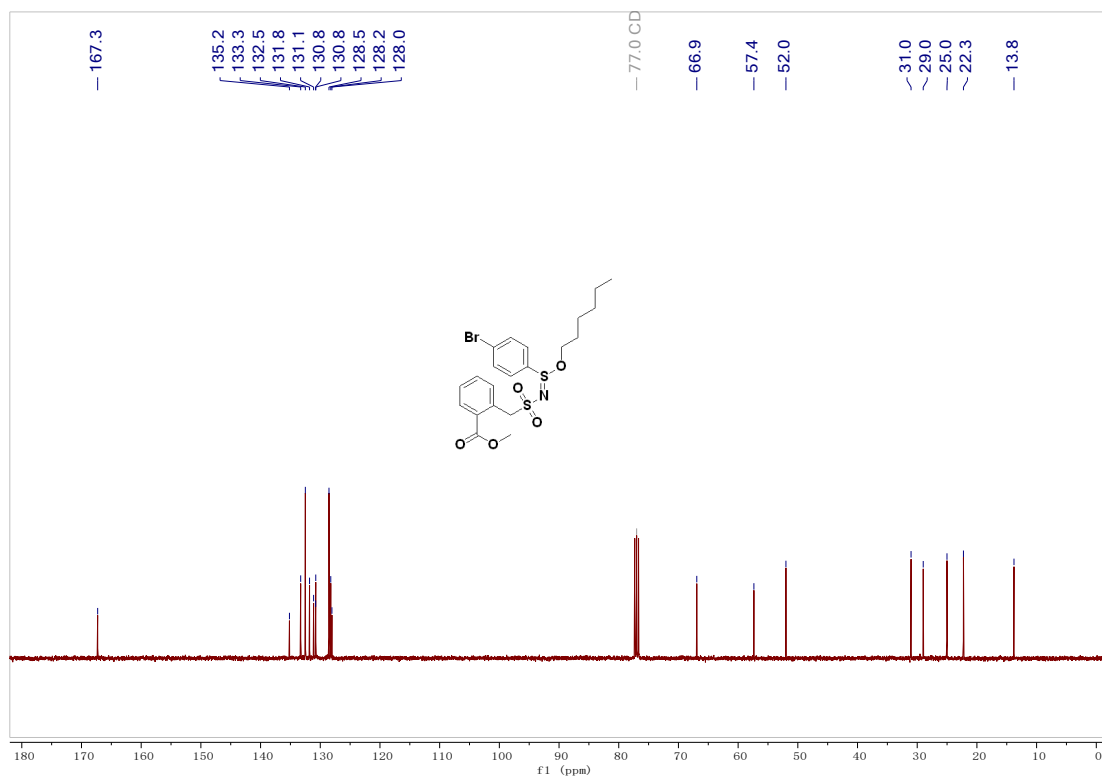

**<sup>1</sup>H NMR (400 MHz, Chloroform-*d*) of compound 4ag**

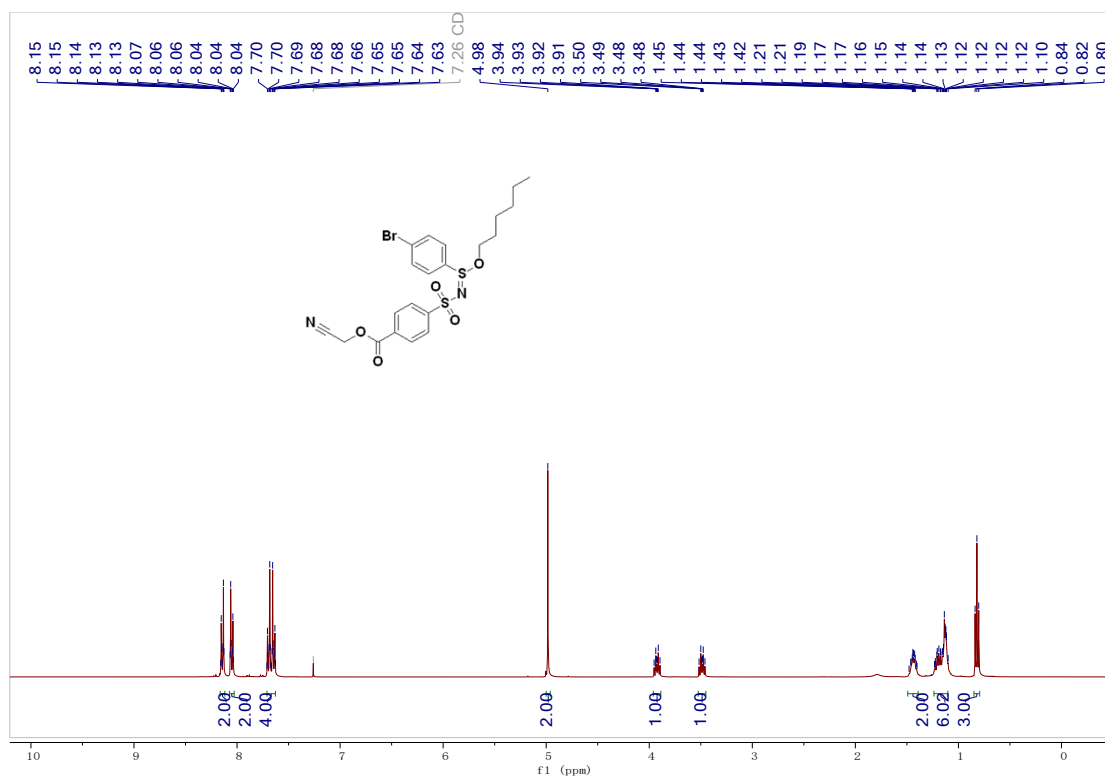

**<sup>13</sup>C NMR (100 MHz, Chloroform-*d*) of compound 4ag**

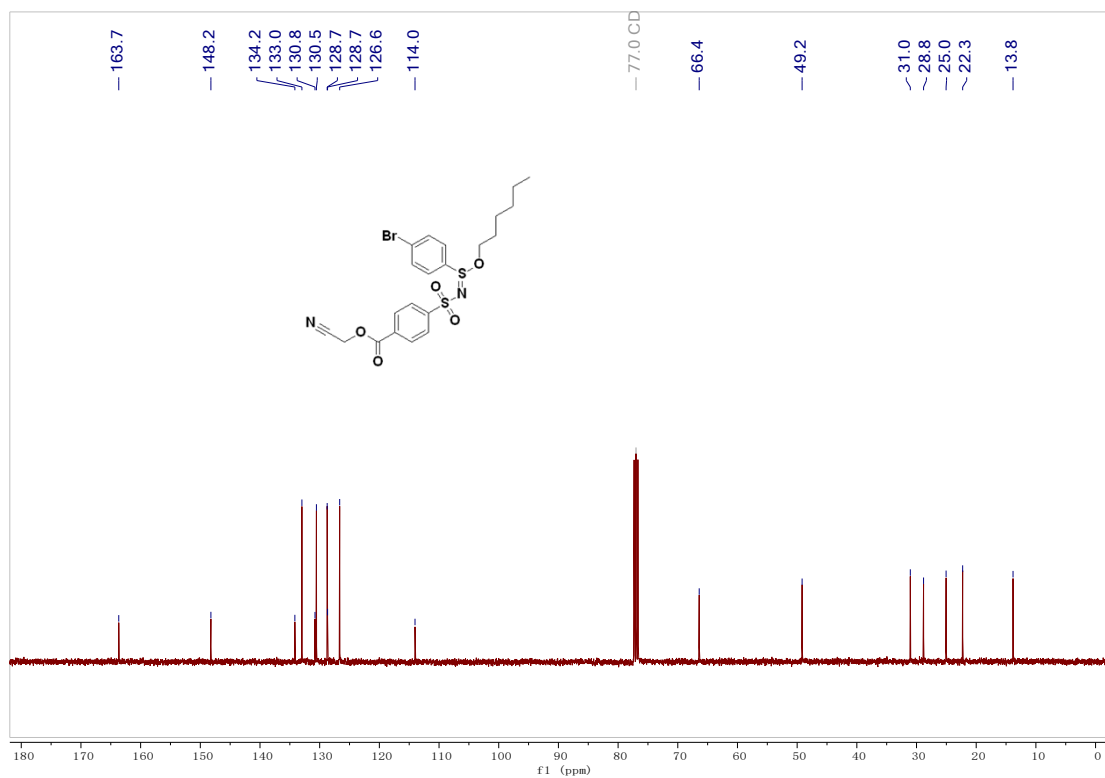

**<sup>1</sup>H NMR (400 MHz, Chloroform-*d*) of compound 4ah**

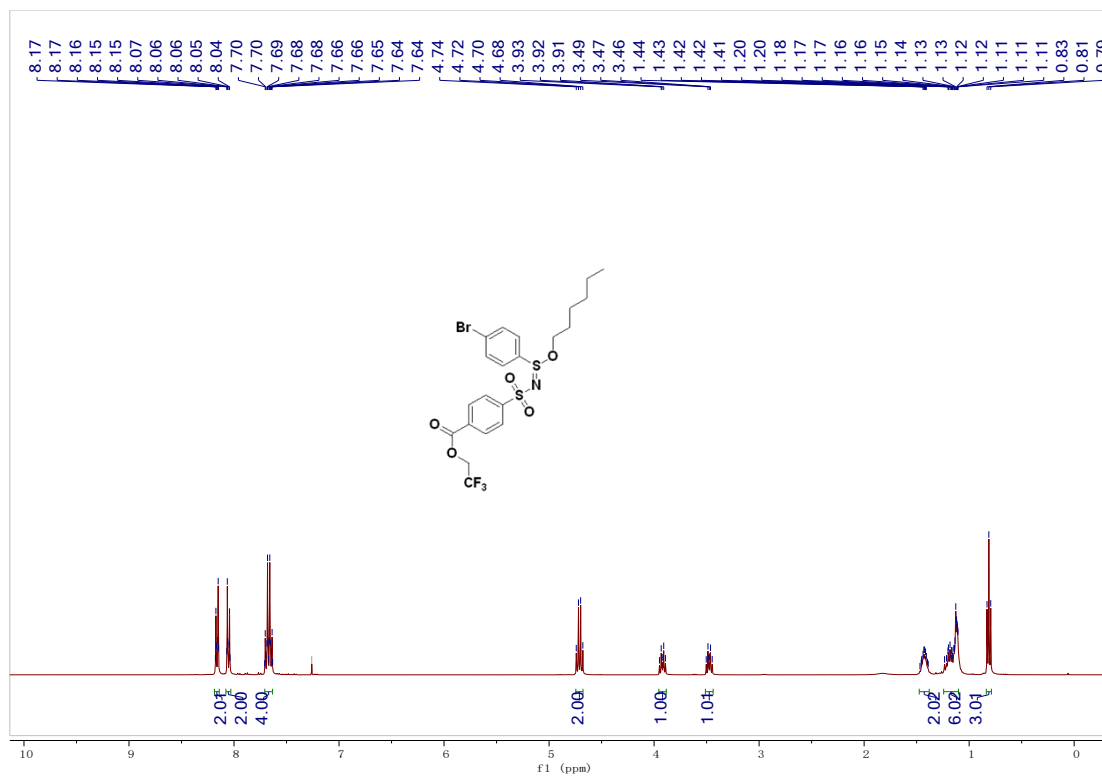

**<sup>13</sup>C NMR (100 MHz, Chloroform-*d*) of compound 4ah**

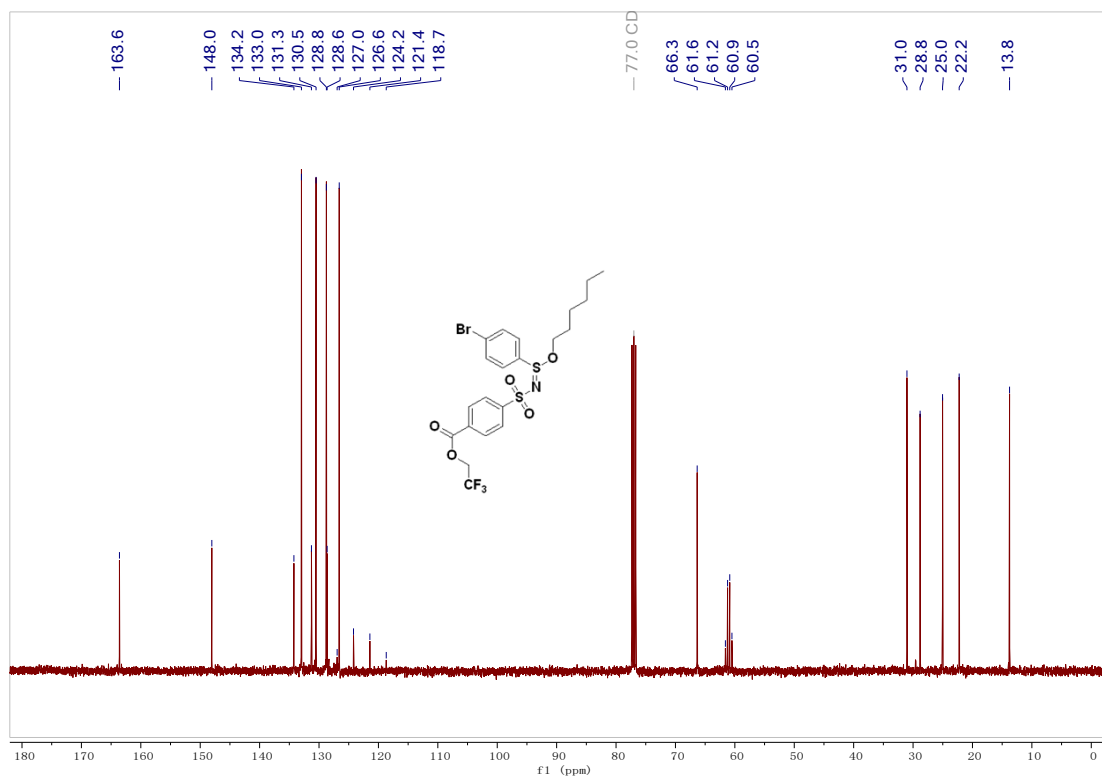

**<sup>19</sup>F NMR (376 MHz, Chloroform-d) of compound 4ah**

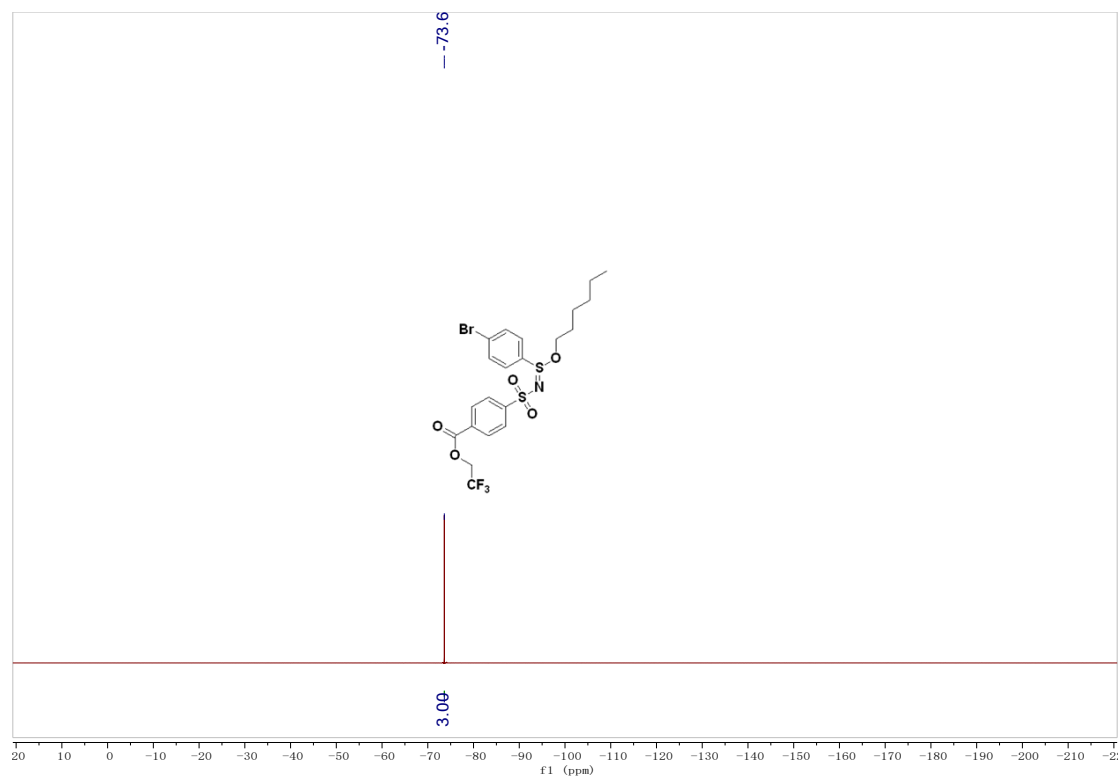

**<sup>1</sup>H NMR (400 MHz, Chloroform-d) of compound 4ai**

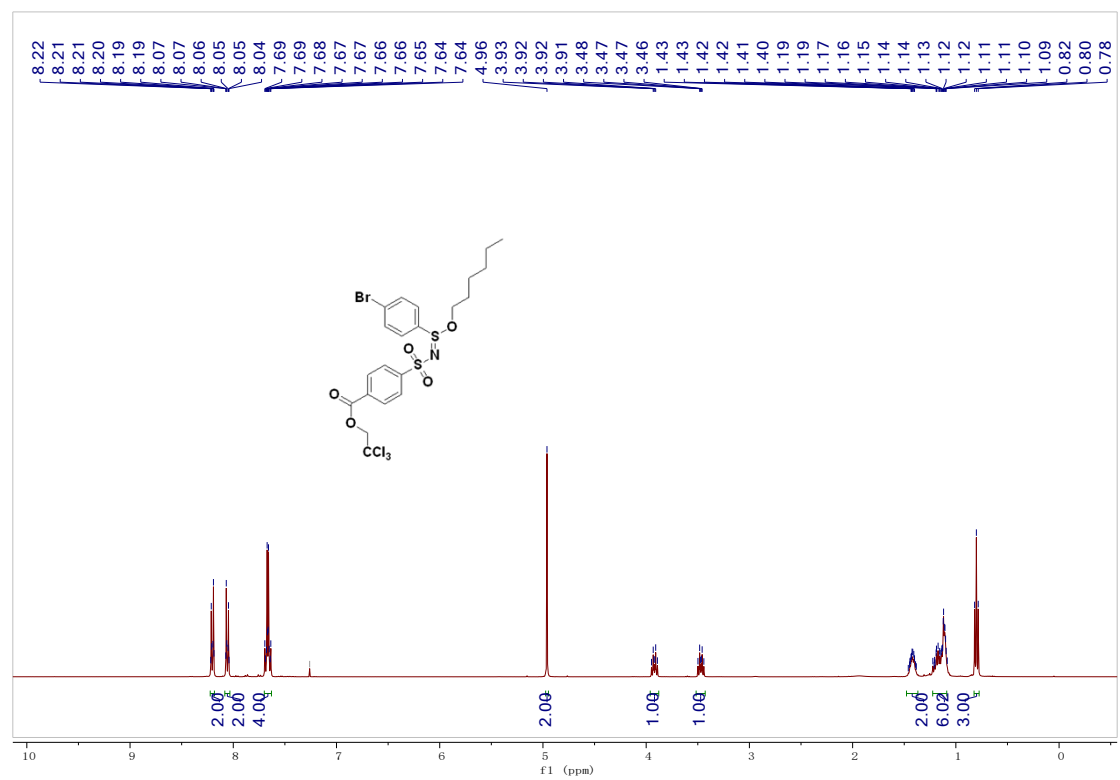

**<sup>13</sup>C NMR (100 MHz, Chloroform-*d*) of compound 4ai**

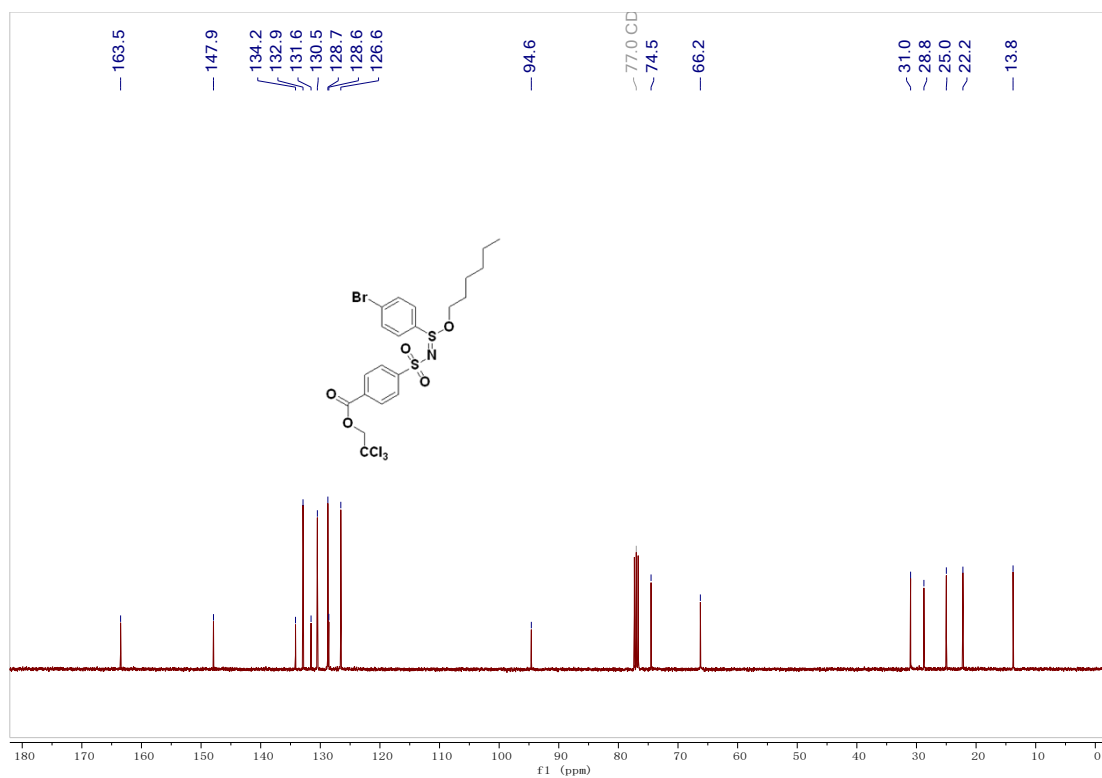

**<sup>1</sup>H NMR (400 MHz, Chloroform-*d*) of compound 4aj**

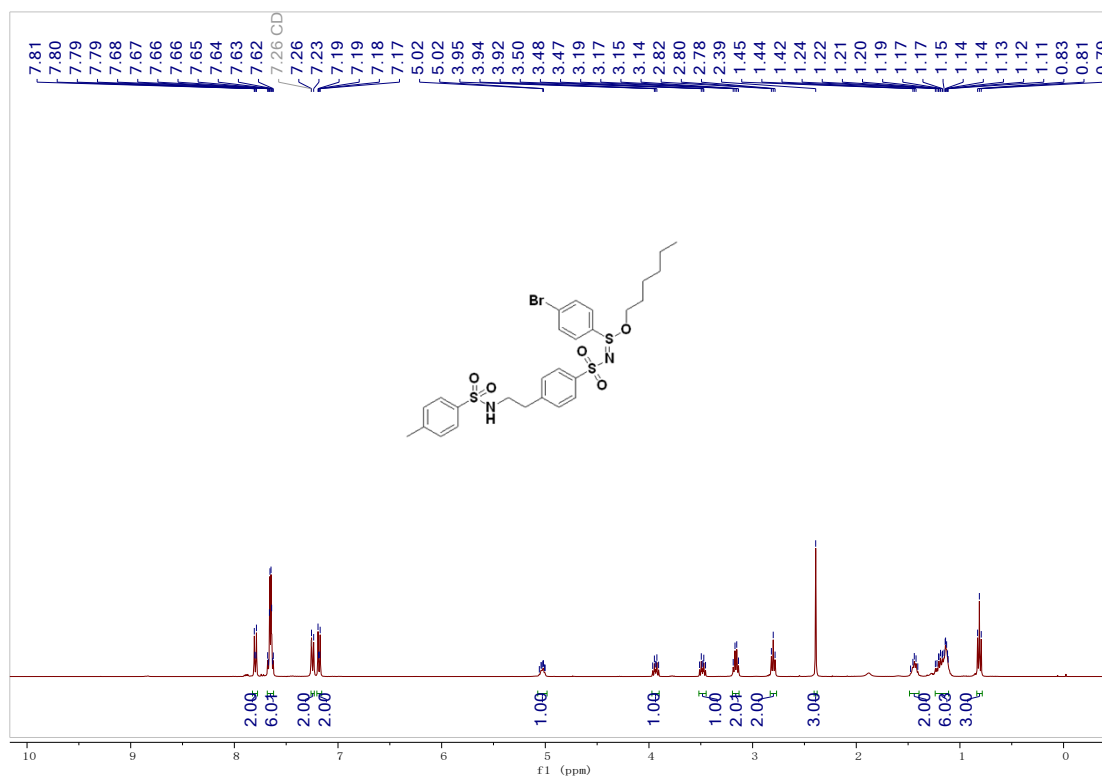

<sup>13</sup>C NMR (100 MHz, Chloroform-*d*) of compound **4aj**

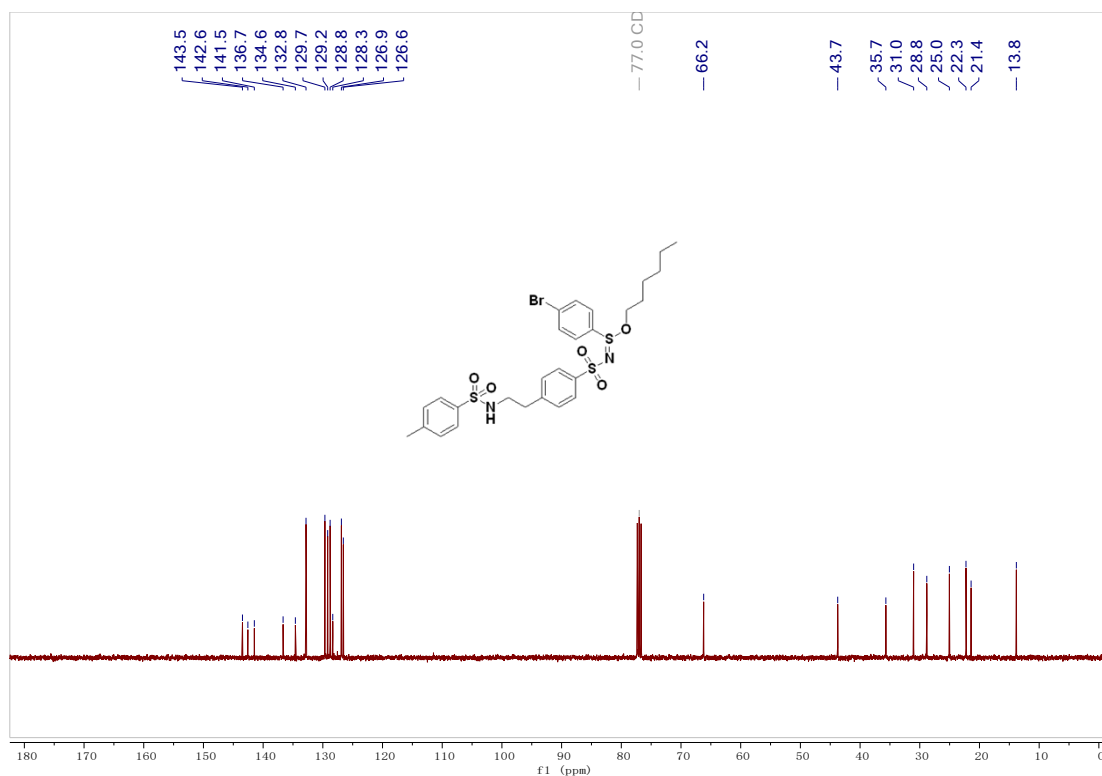

<sup>1</sup>H NMR (400 MHz, Chloroform-*d*) of compound **4ak**

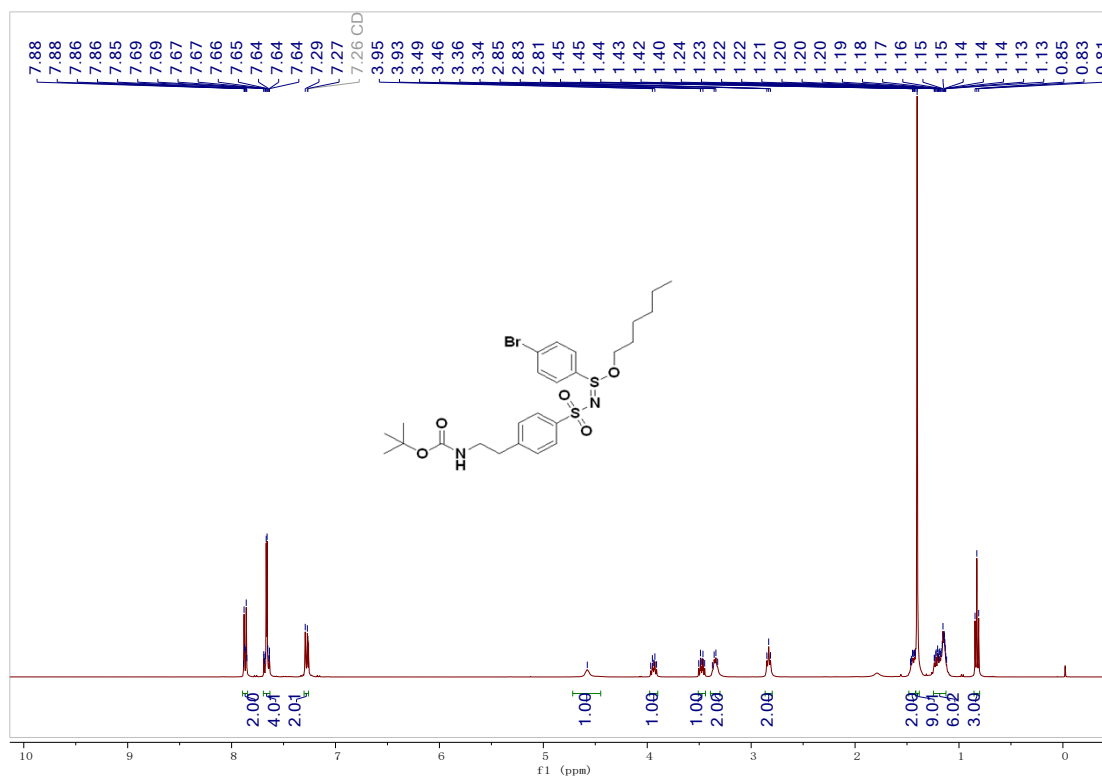



<sup>13</sup>C NMR (100 MHz, Chloroform-*d*) of compound **4ak**

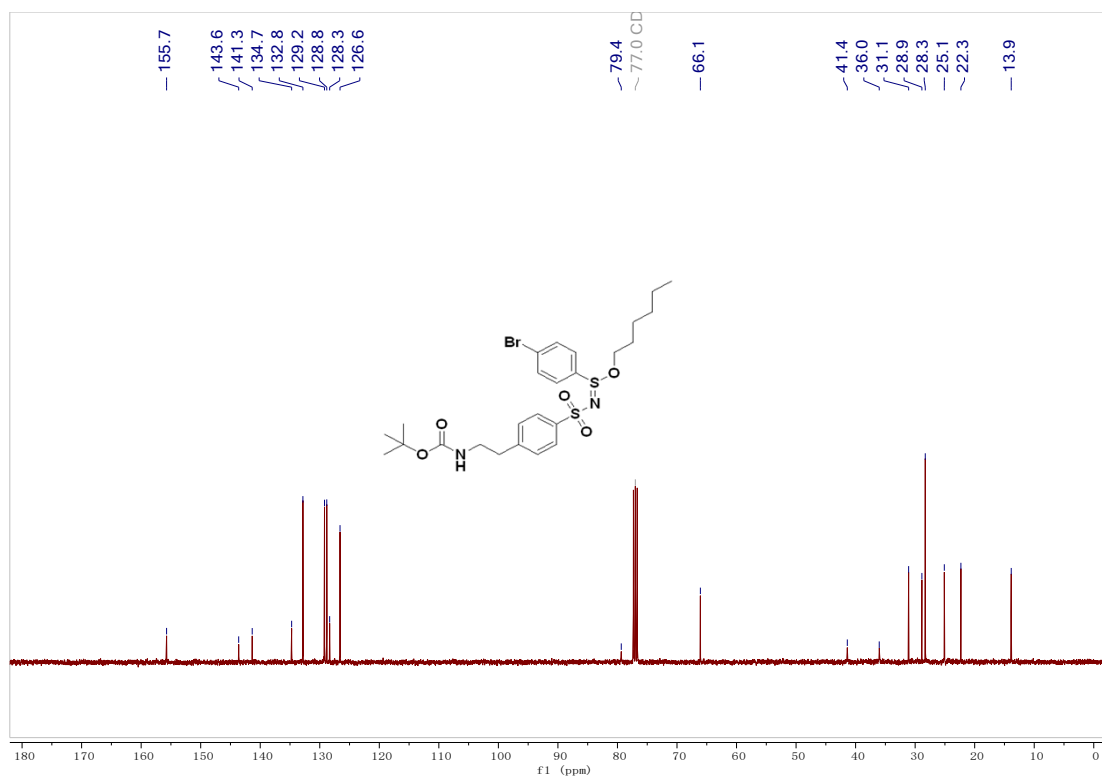

<sup>1</sup>H NMR (400 MHz, Chloroform-*d*) of compound **4al**

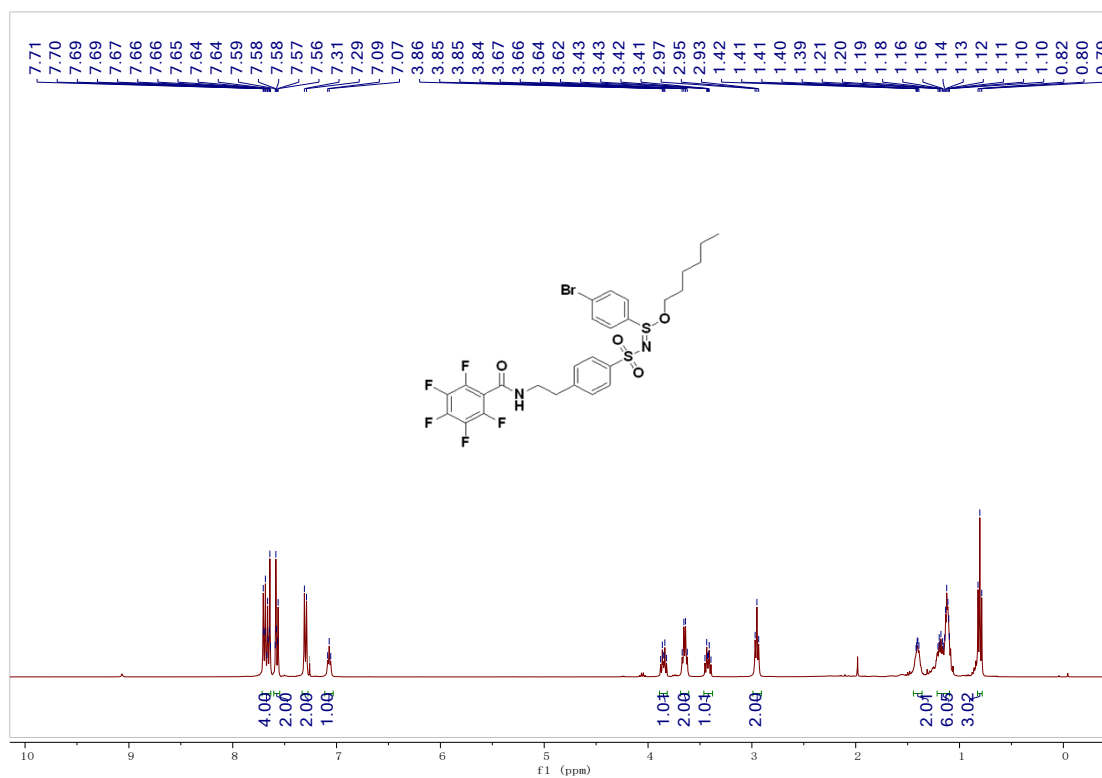

**<sup>13</sup>C NMR (100 MHz, Chloroform-*d*) of compound 4aI**

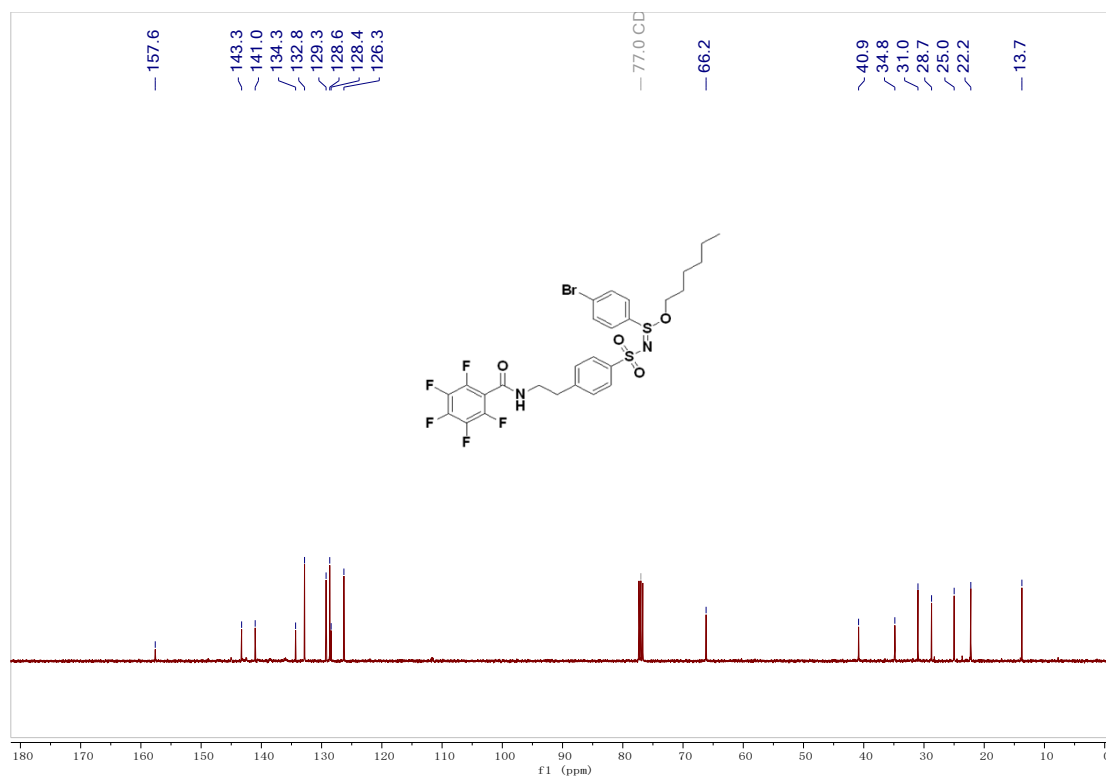

**<sup>19</sup>F NMR (376 MHz, Chloroform-*d*) of compound 4aI**

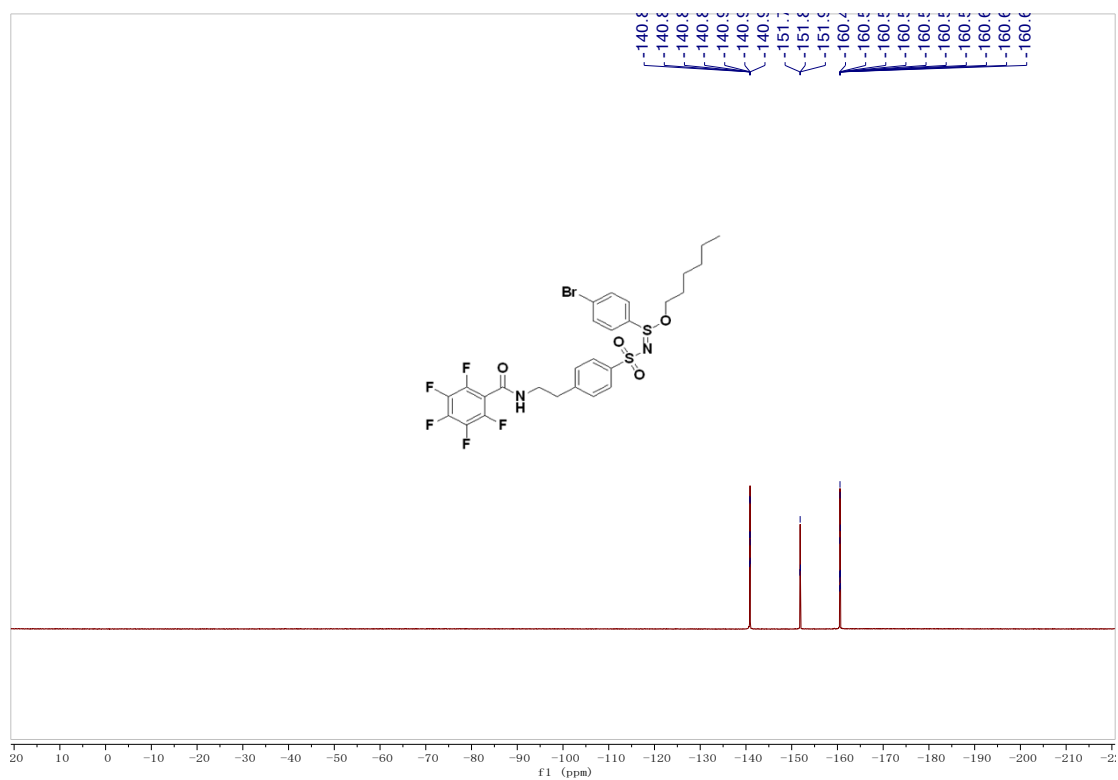

<sup>1</sup>H NMR (400 MHz, Chloroform-*d*) of compound **4am**

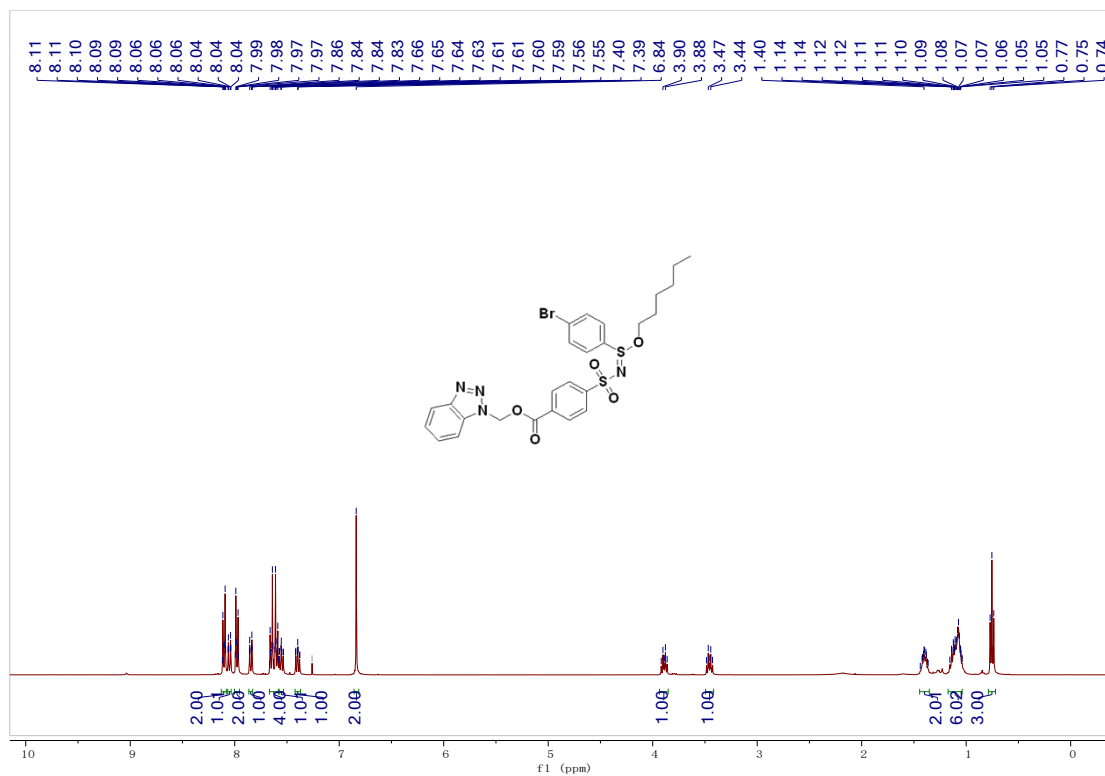

<sup>13</sup>C NMR (100 MHz, Chloroform-*d*) of compound **4am**

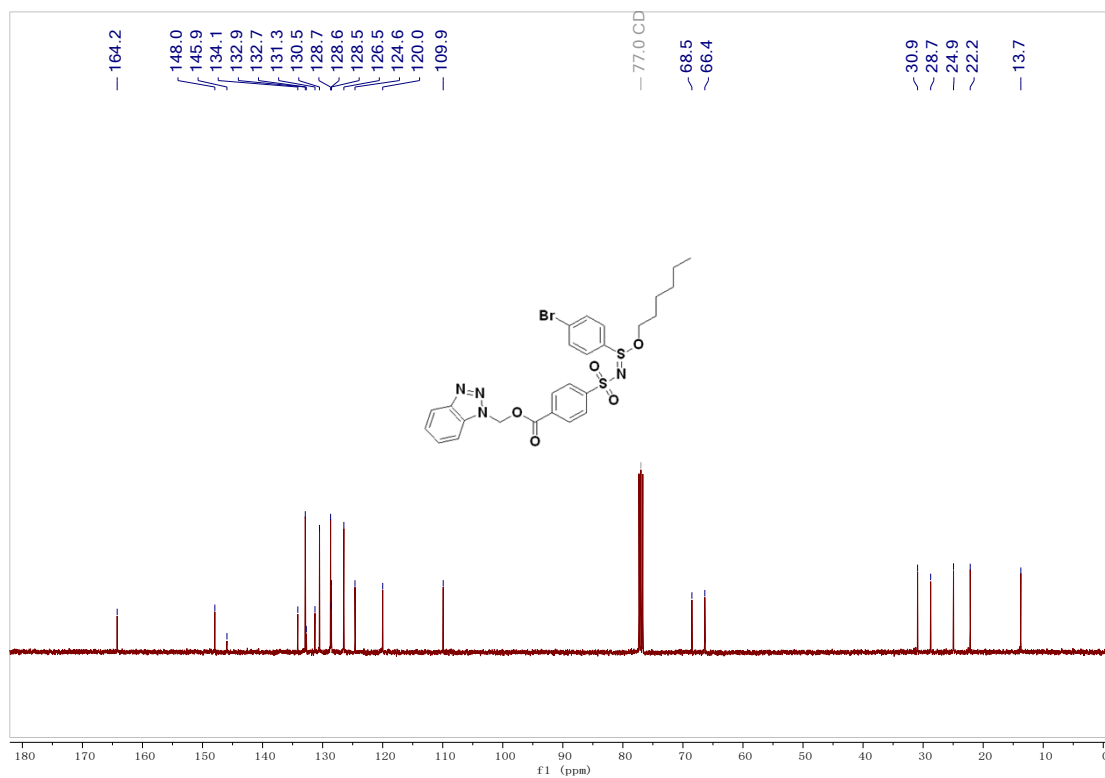

**<sup>1</sup>H NMR (400 MHz, Chloroform-*d*) of compound 4an**

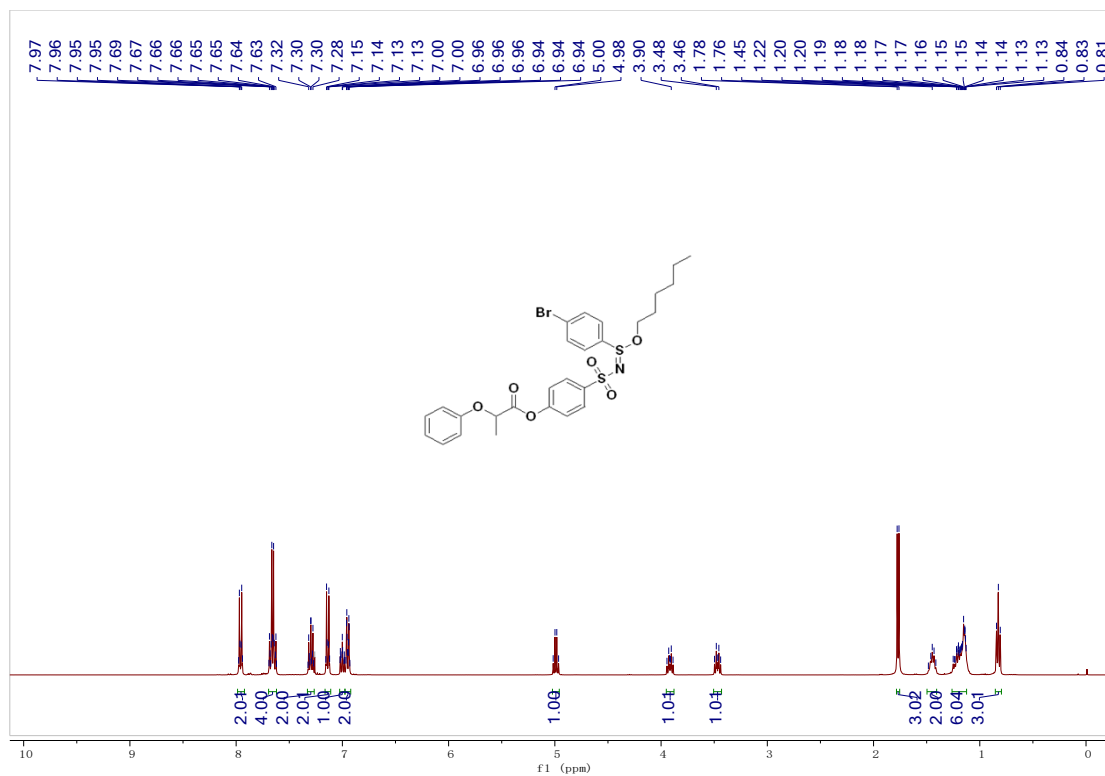

**<sup>13</sup>C NMR (100 MHz, Chloroform-*d*) of compound 4an**

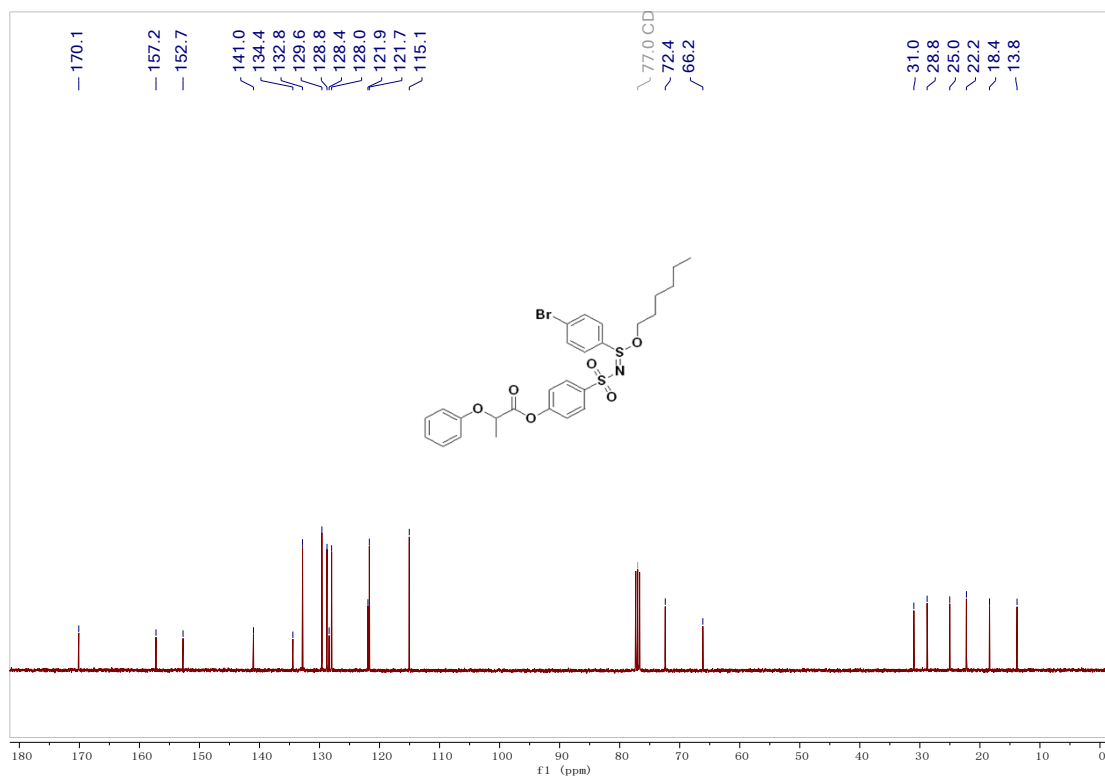

**<sup>1</sup>H NMR (400 MHz, Chloroform-*d*) of compound 4ao**

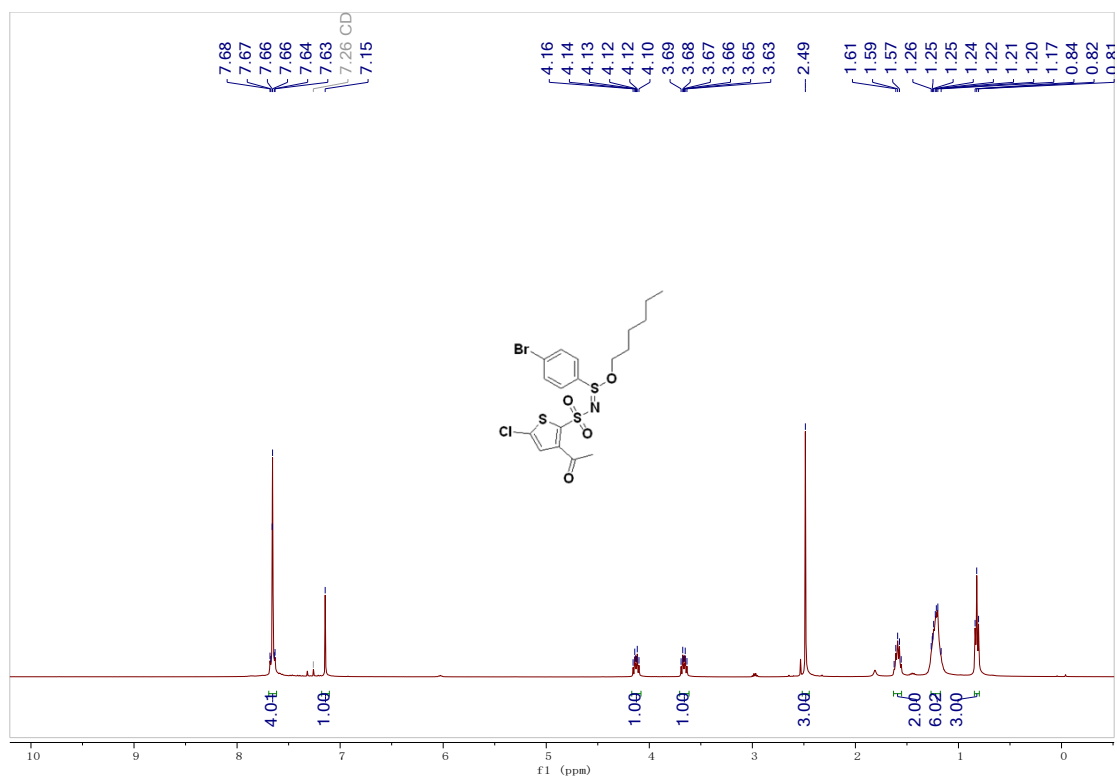

**<sup>13</sup>C NMR (100 MHz, Chloroform-*d*) of compound 4ao**

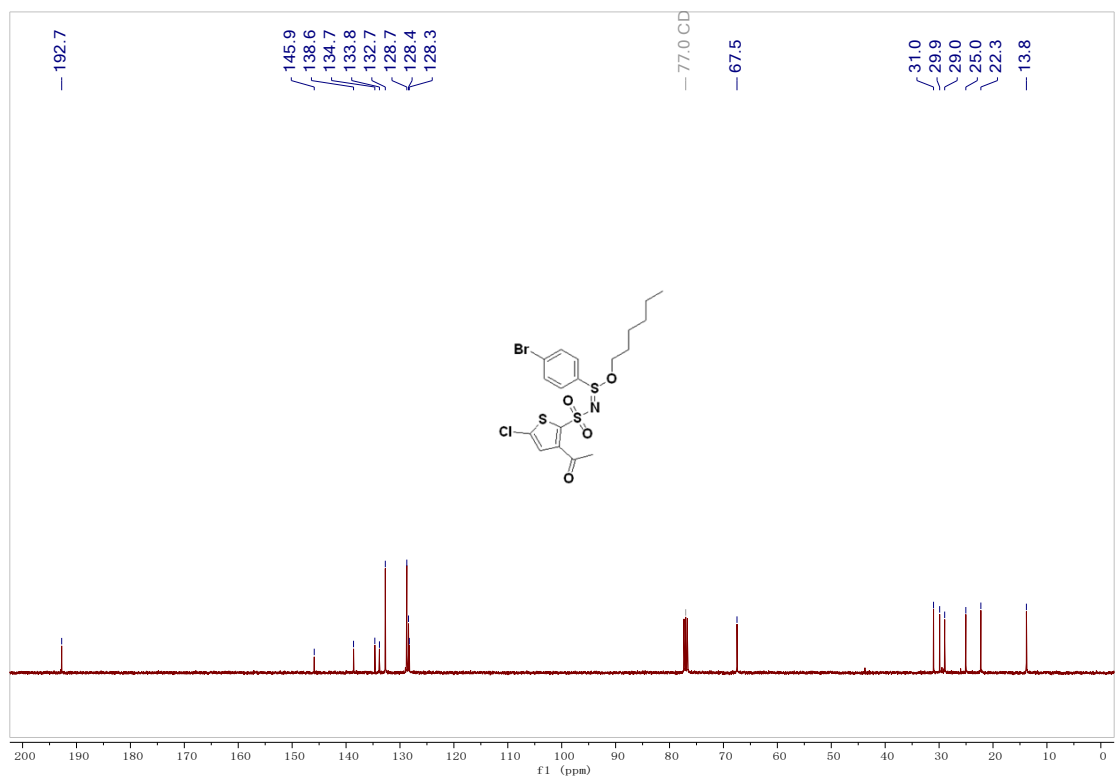

**<sup>1</sup>H NMR (400 MHz, Chloroform-*d*) of compound 4ap**

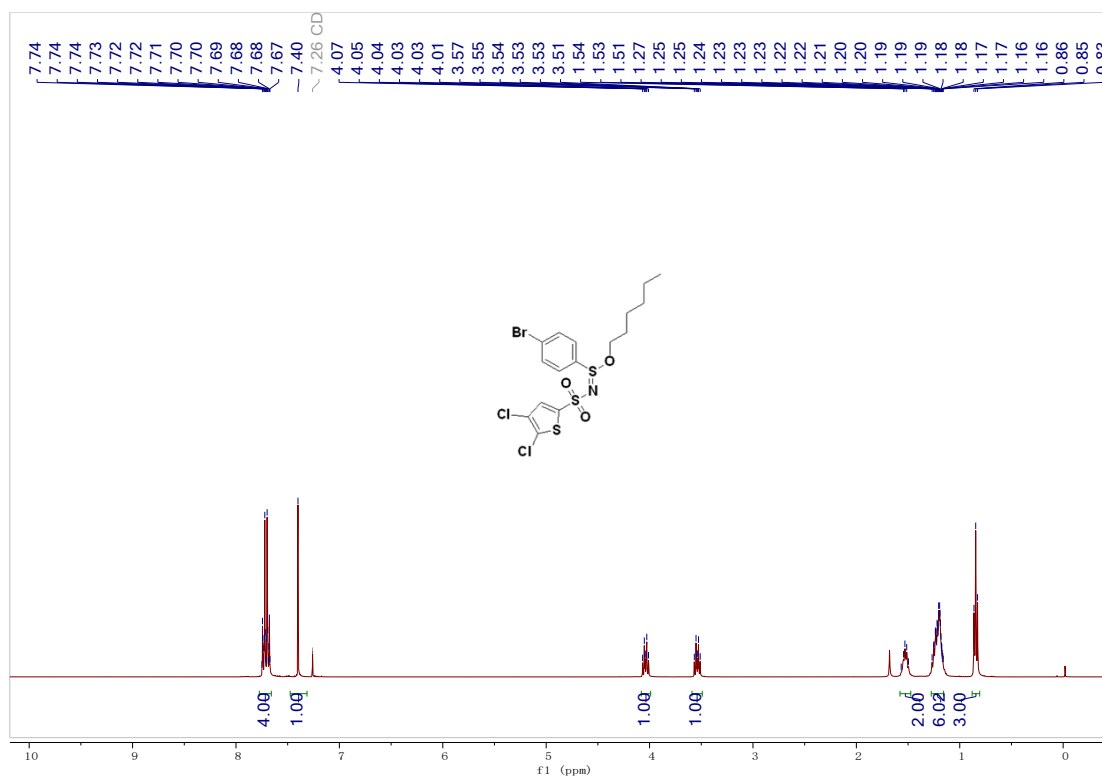

**<sup>13</sup>C NMR (100 MHz, Chloroform-*d*) of compound 4ap**

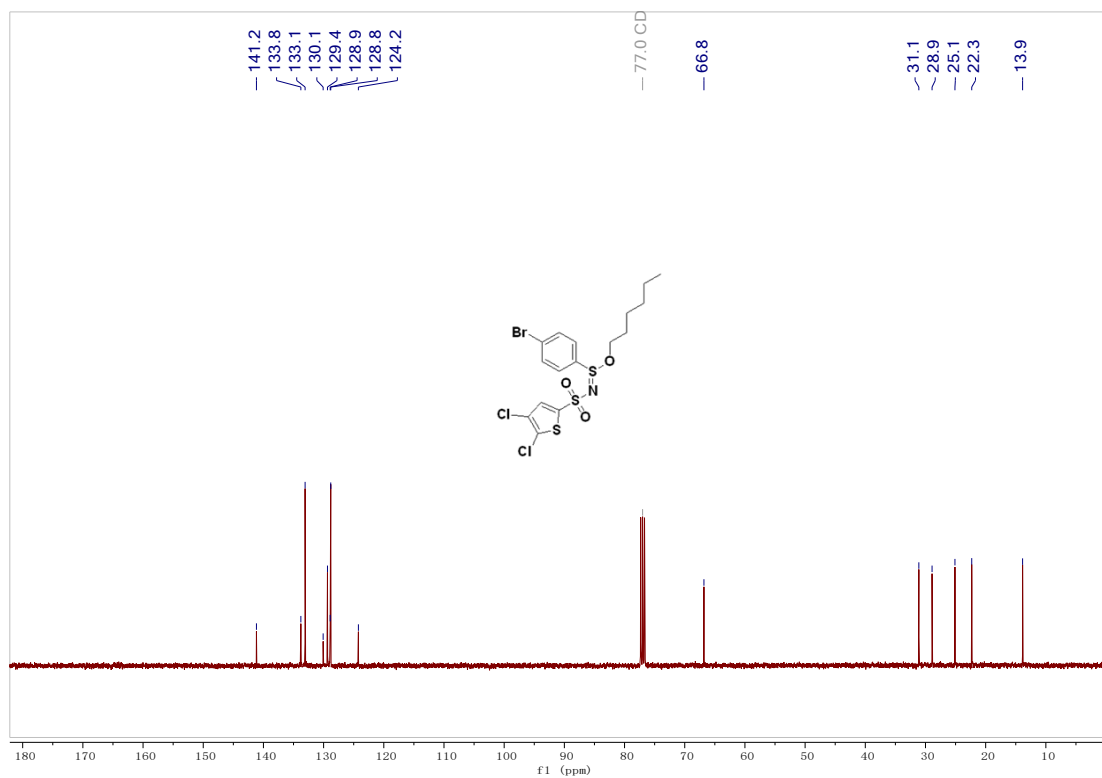

**<sup>1</sup>H NMR (400 MHz, Chloroform-*d*) of compound 4aq**

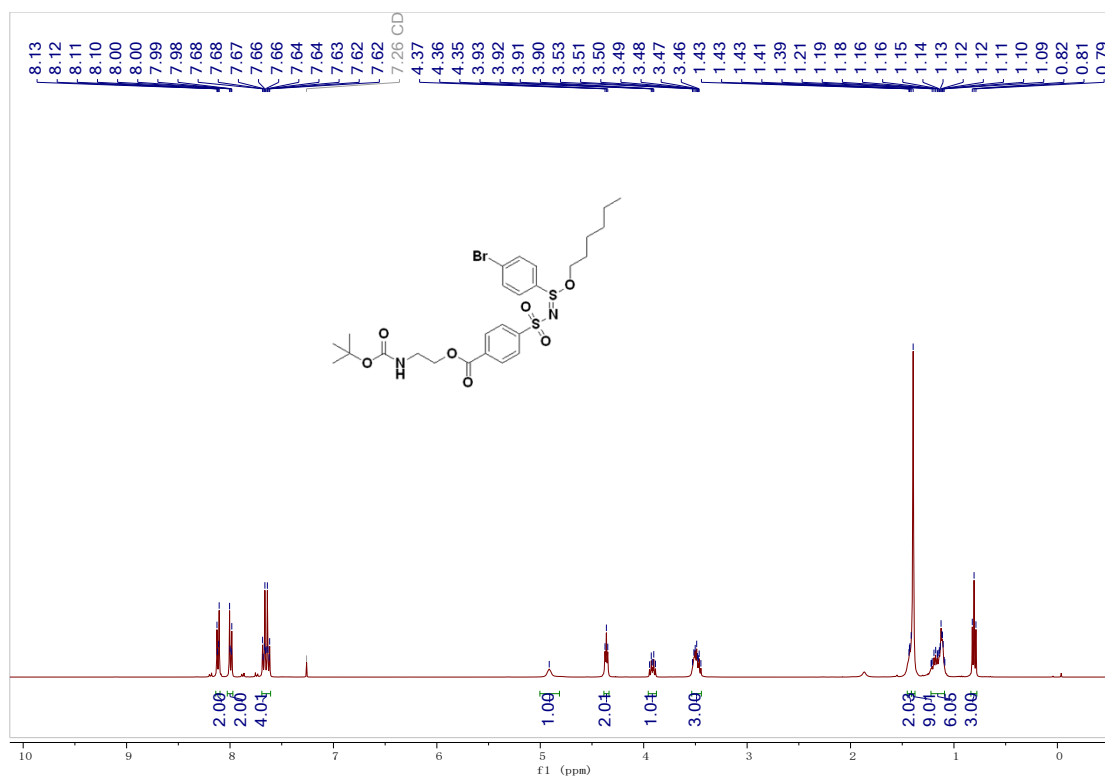

**<sup>13</sup>C NMR (100 MHz, Chloroform-*d*) of compound 4aq**

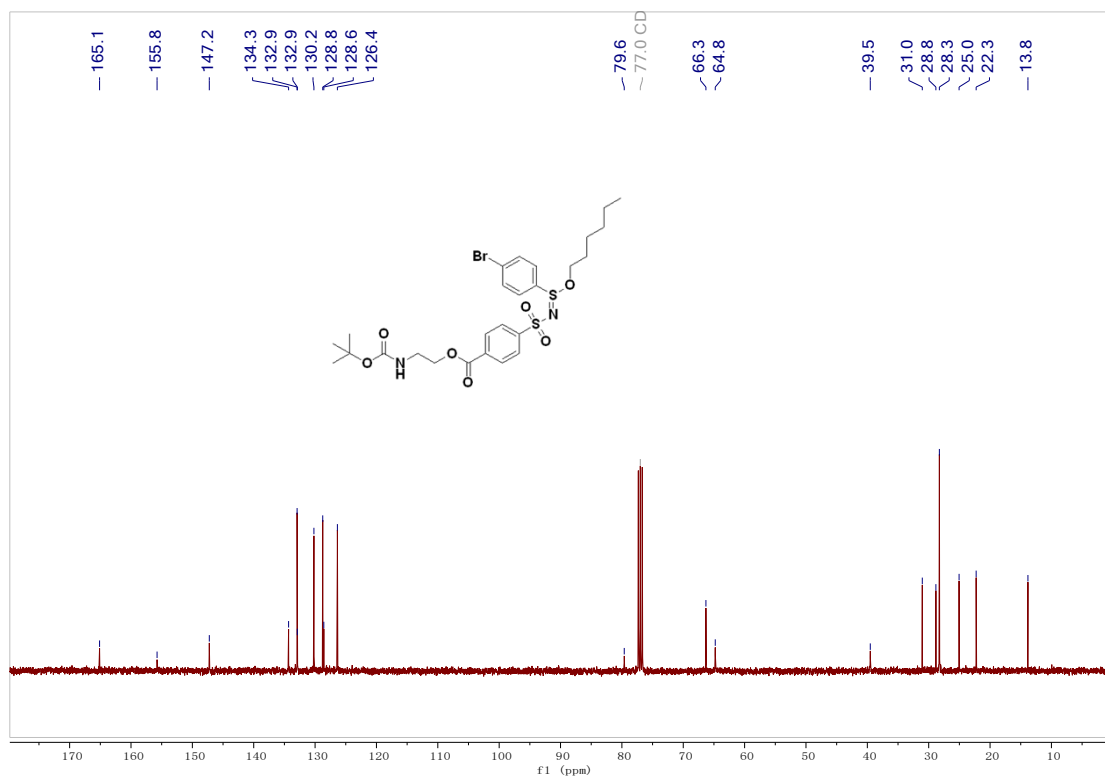

**<sup>1</sup>H NMR (400 MHz, Chloroform-*d*) of compound 4ar**

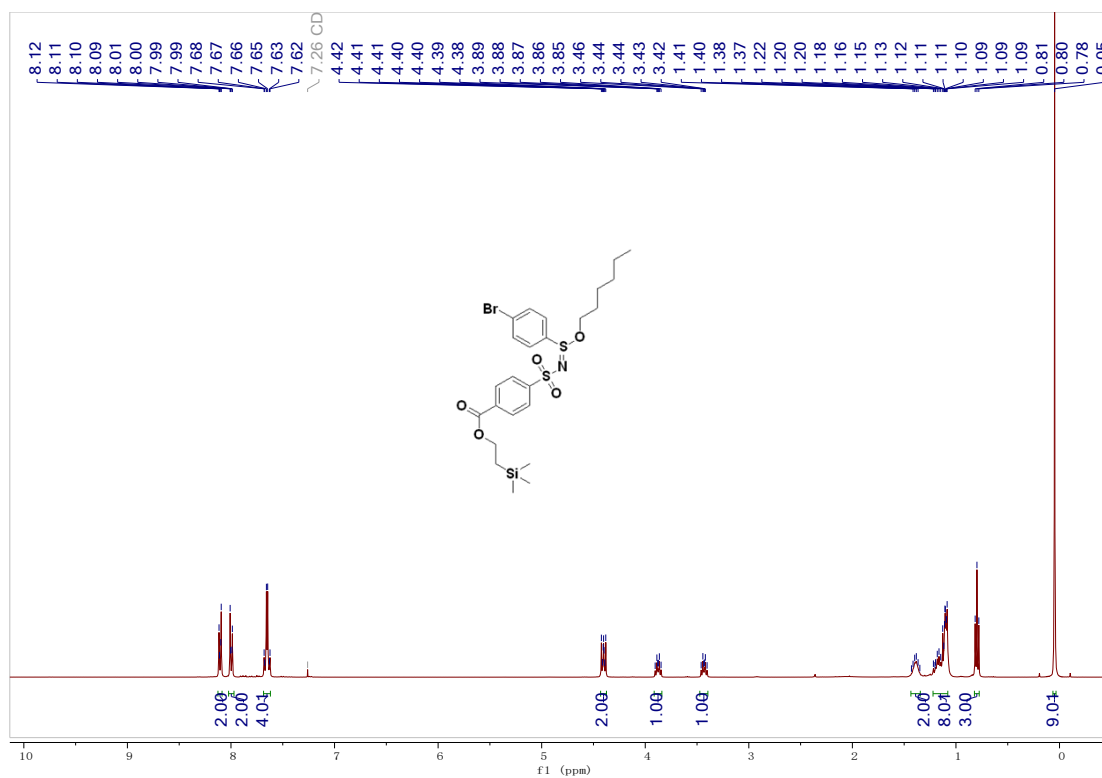

**<sup>13</sup>C NMR (100 MHz, Chloroform-*d*) of compound 4ar**

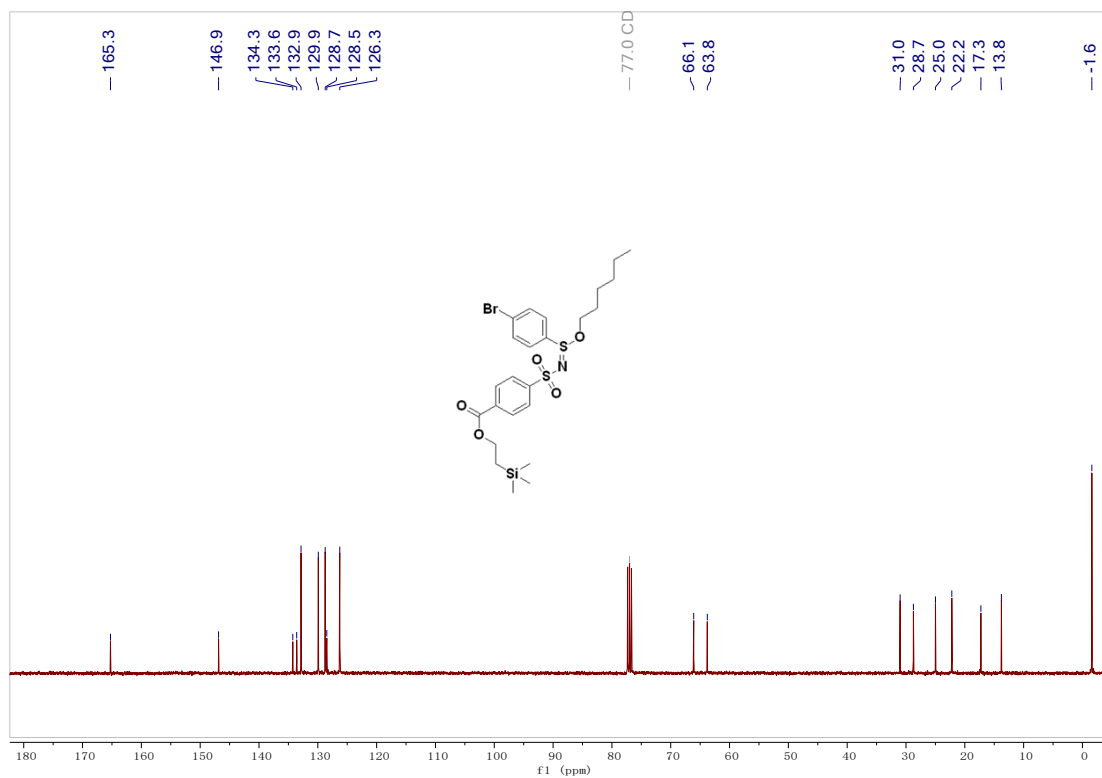



**<sup>1</sup>H NMR (400 MHz, Chloroform-*d*) of compound 4as**

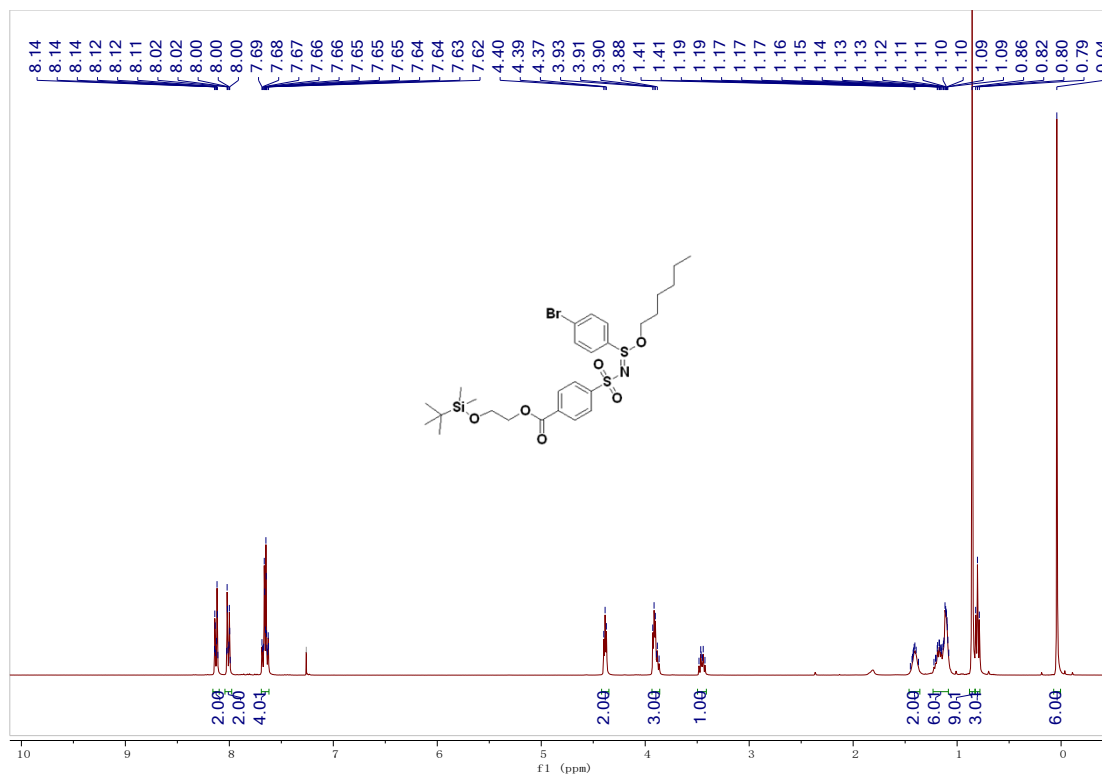

**<sup>13</sup>C NMR (100 MHz, Chloroform-*d*) of compound 4as**

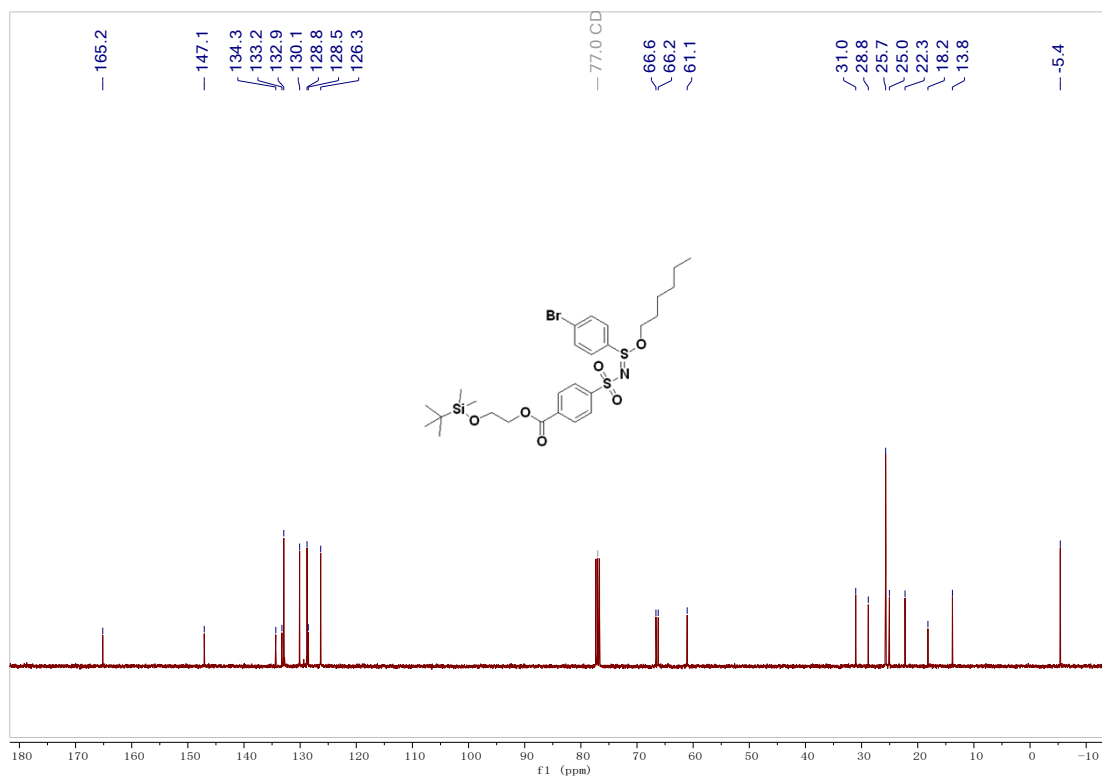

**$^1\text{H}$  NMR (400 MHz, Chloroform-*d*) of compound 4at**

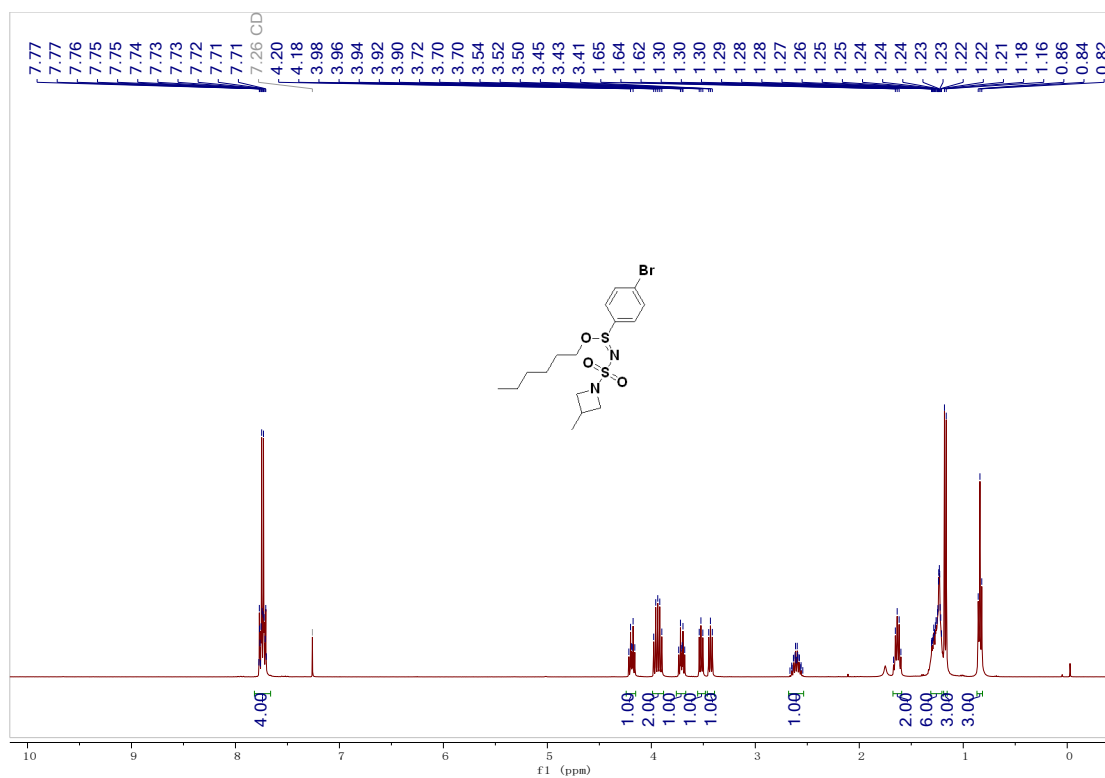

**$^{13}\text{C}$  NMR (100 MHz, Chloroform-*d*) of compound 4at**

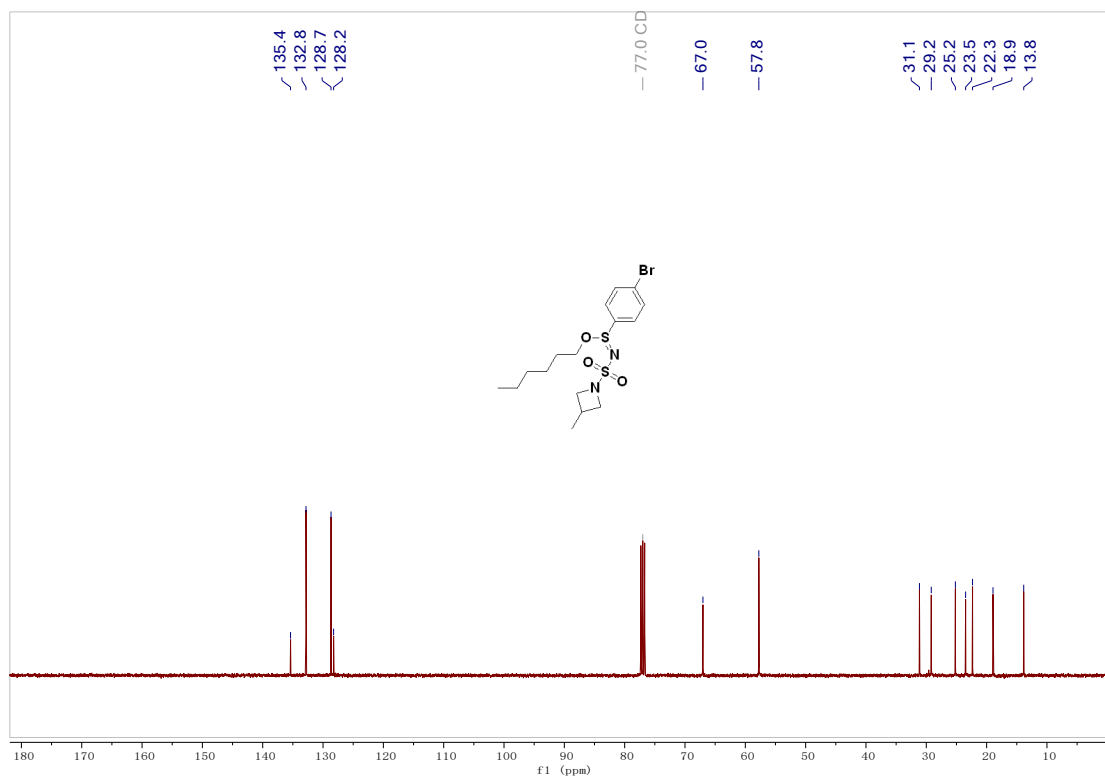

**<sup>1</sup>H NMR (400 MHz, Chloroform-*d*) of compound 4au**

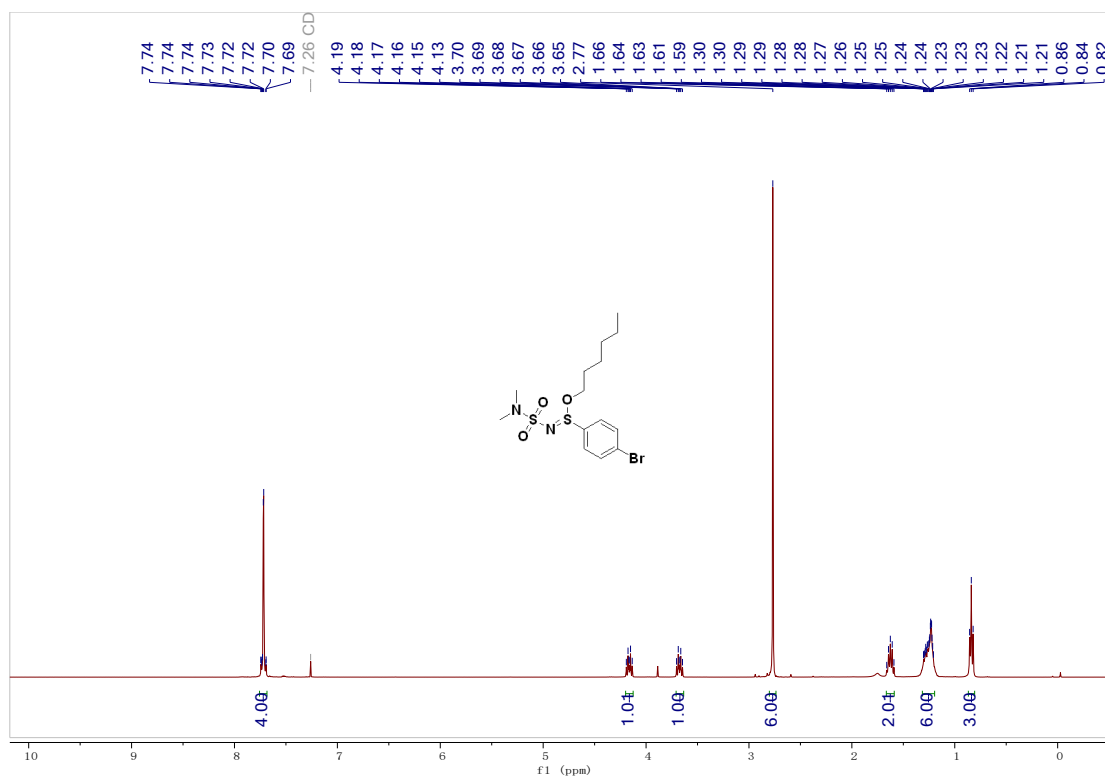

**<sup>13</sup>C NMR (100 MHz, Chloroform-*d*) of compound 4au**

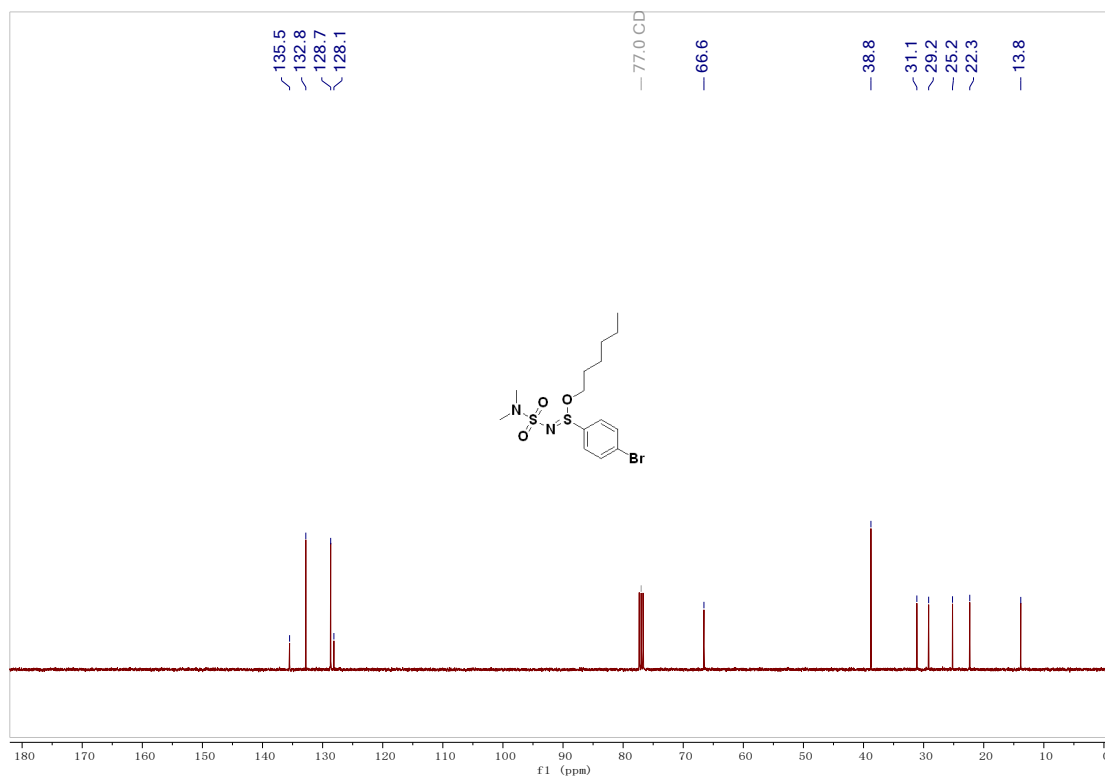

**<sup>1</sup>H NMR (400 MHz, Chloroform-*d*) of compound 4av**

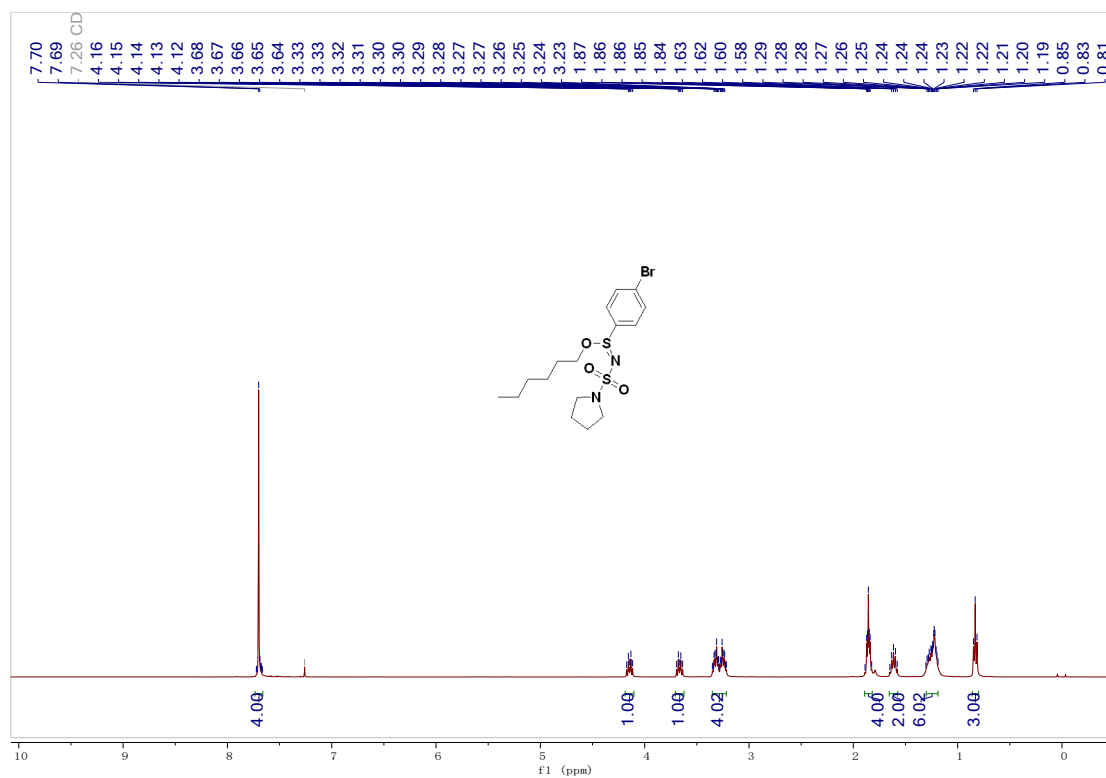

**<sup>13</sup>C NMR (100 MHz, Chloroform-*d*) of compound 4av**

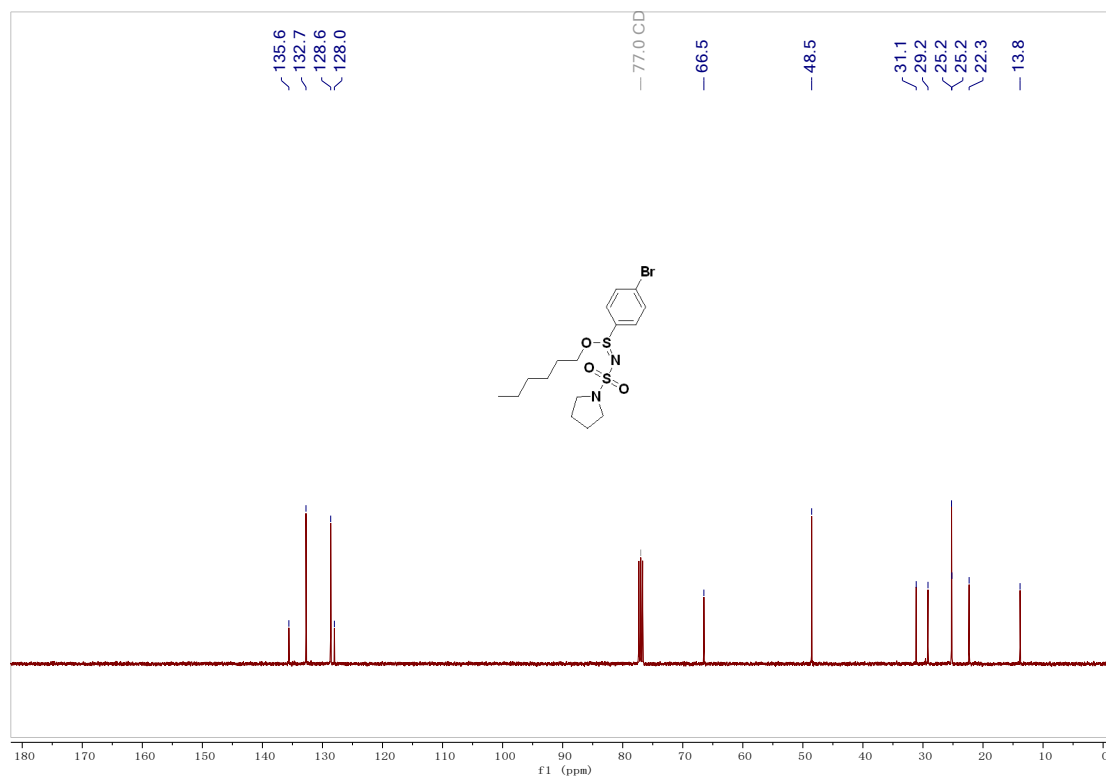

**<sup>1</sup>H NMR (400 MHz, Chloroform-*d*) of compound 4aw**

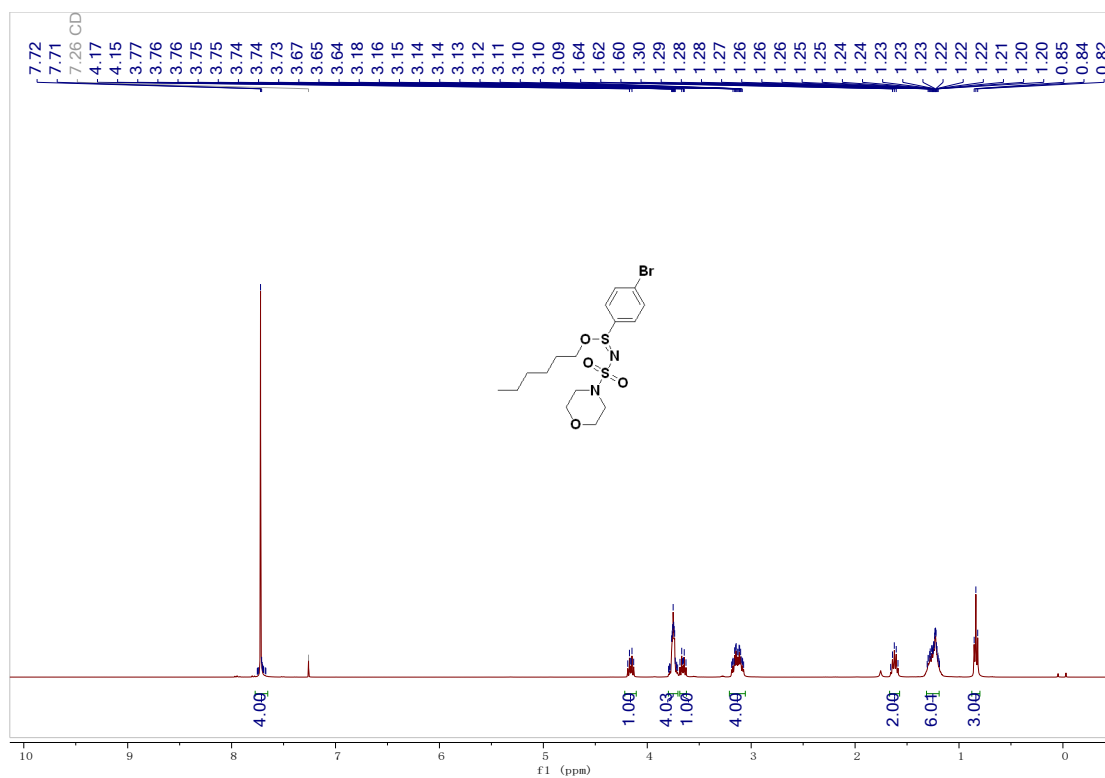

**<sup>13</sup>C NMR (100 MHz, Chloroform-*d*) of compound 4aw**

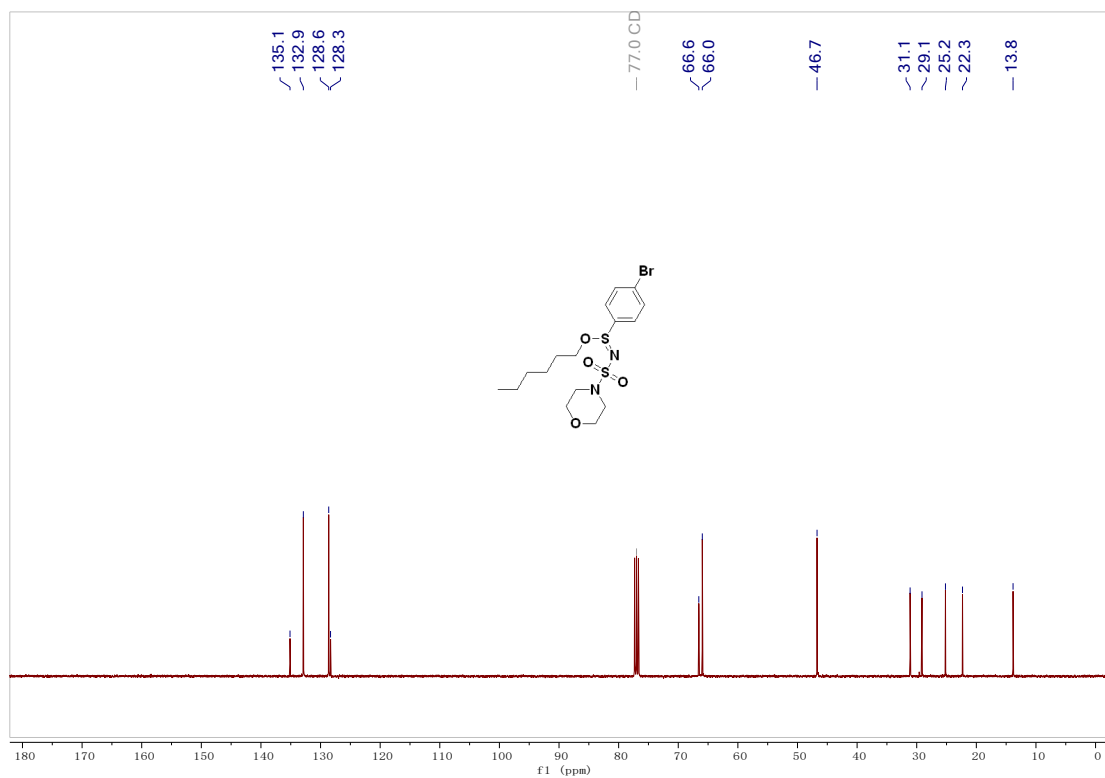

**<sup>1</sup>H NMR (400 MHz, Chloroform-*d*) of compound 4ax**

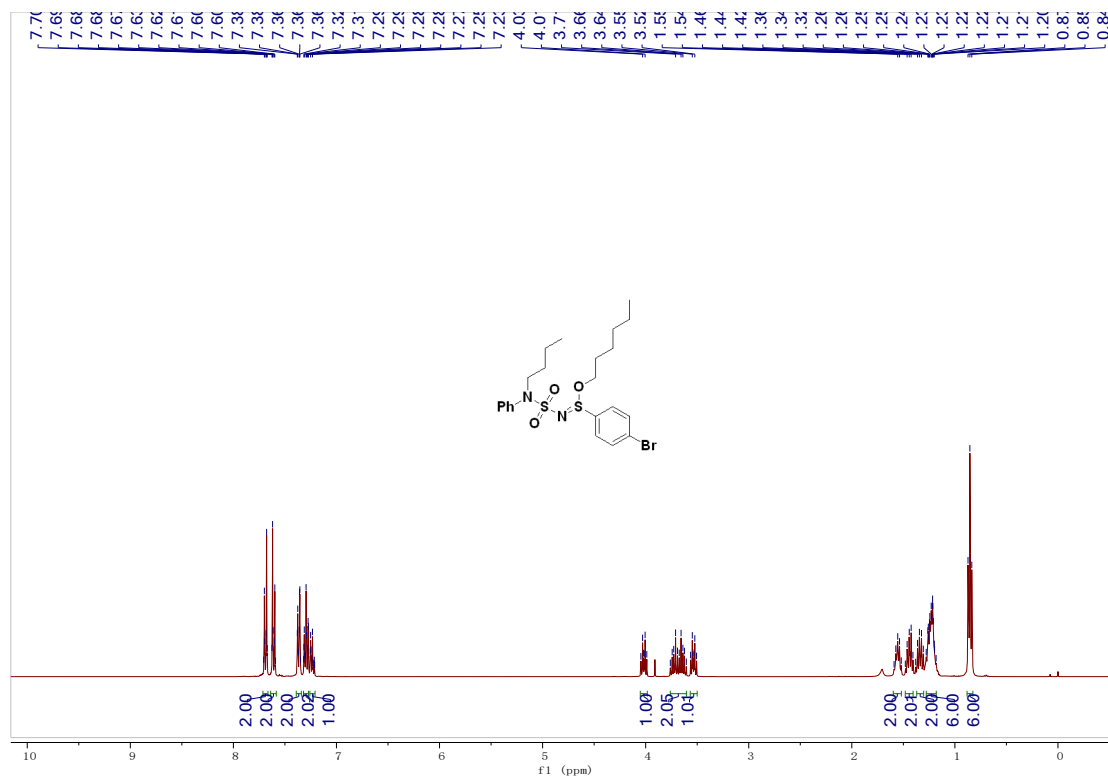

**<sup>13</sup>C NMR (100 MHz, Chloroform-*d*) of compound 4ax**

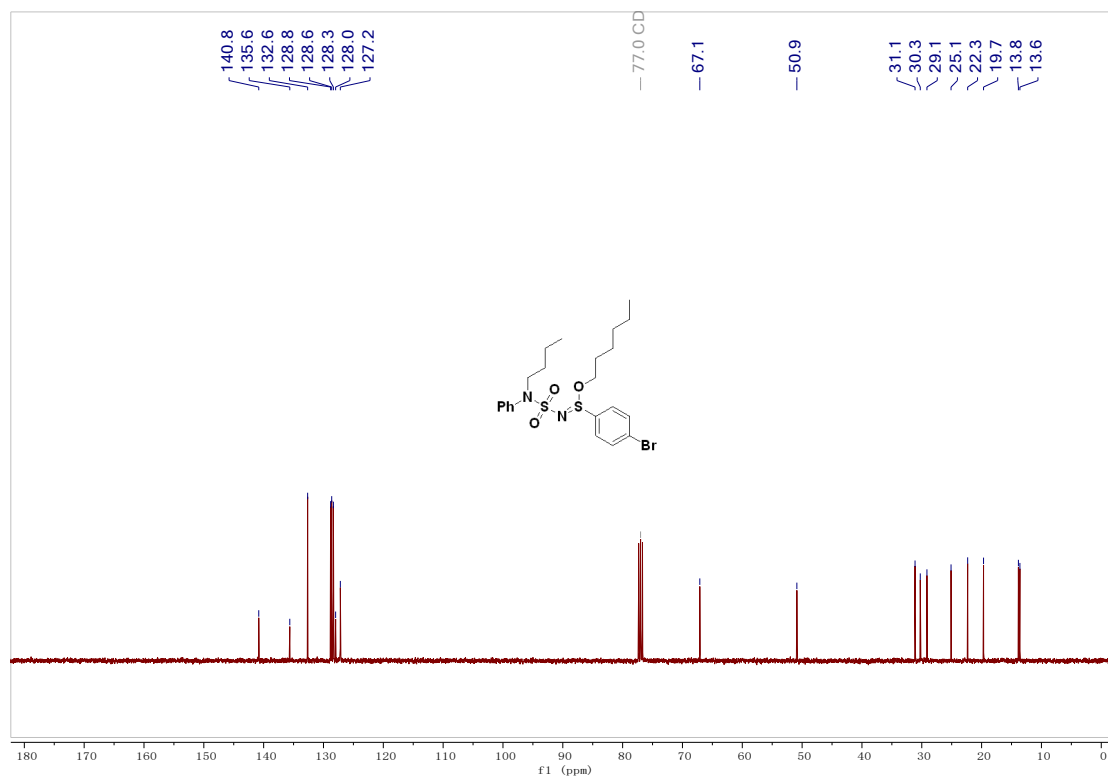

**<sup>1</sup>H NMR (400 MHz, Chloroform-*d*) of compound 4ay**

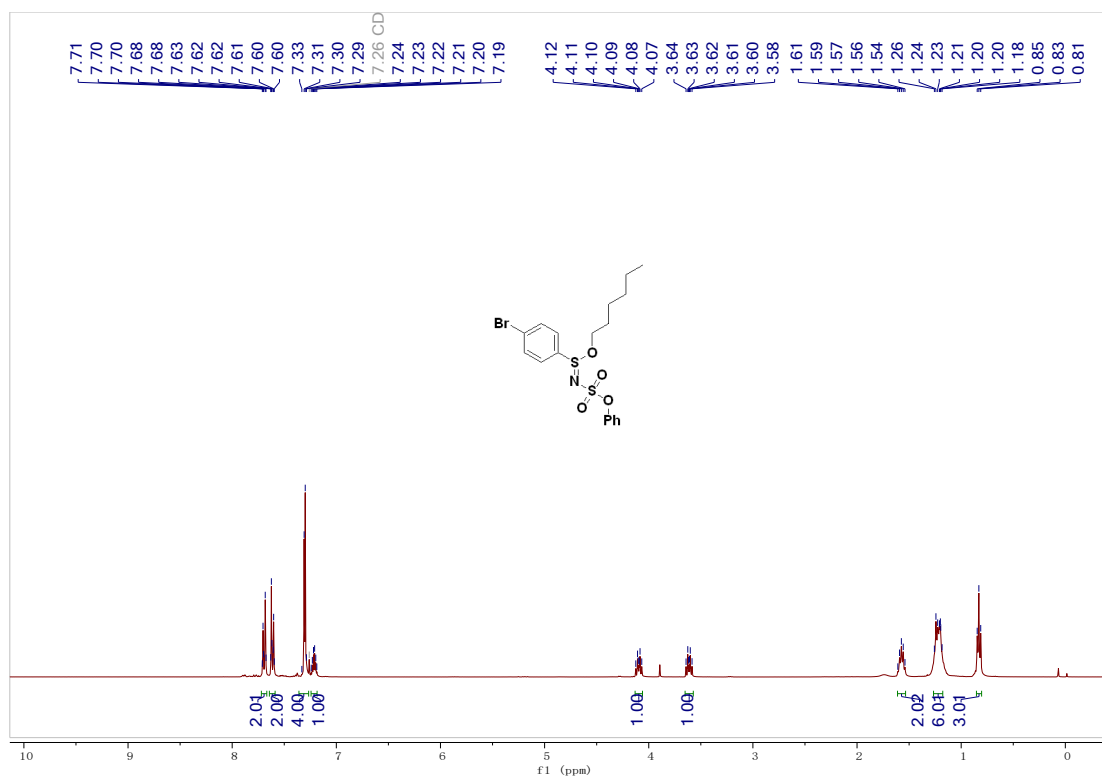

**<sup>13</sup>C NMR (100 MHz, Chloroform-*d*) of compound 4ay**

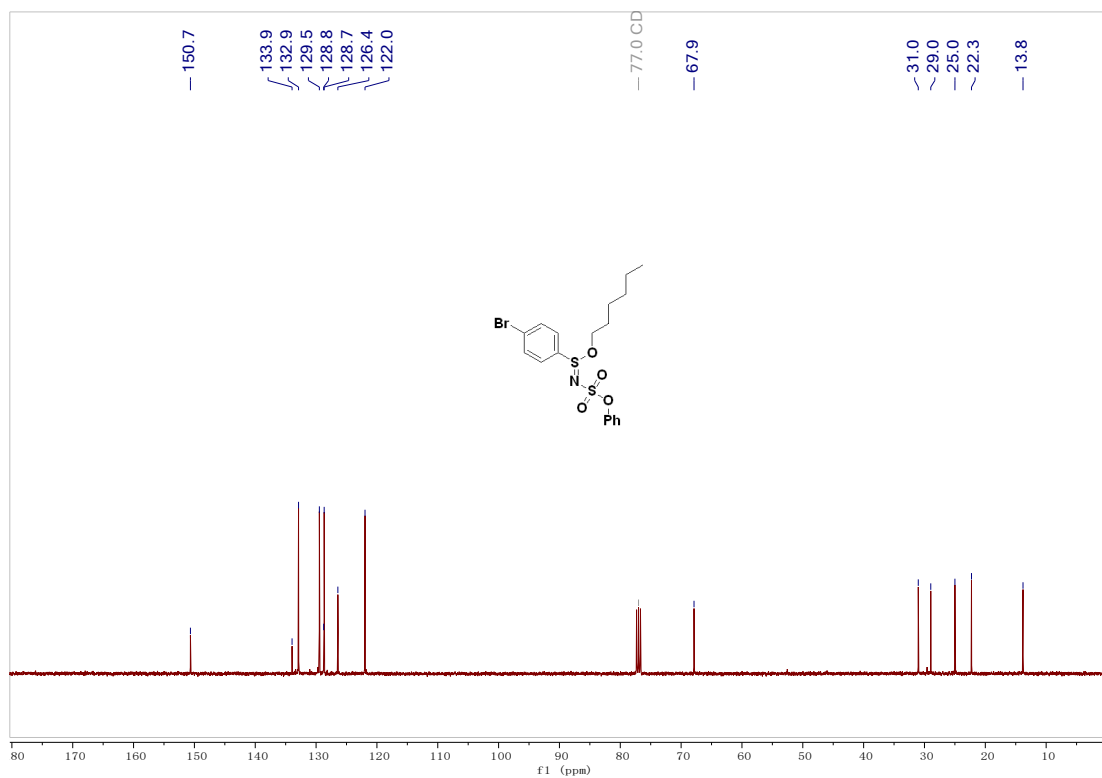

**<sup>1</sup>H NMR (400 MHz, Chloroform-*d*) of compound 4az**

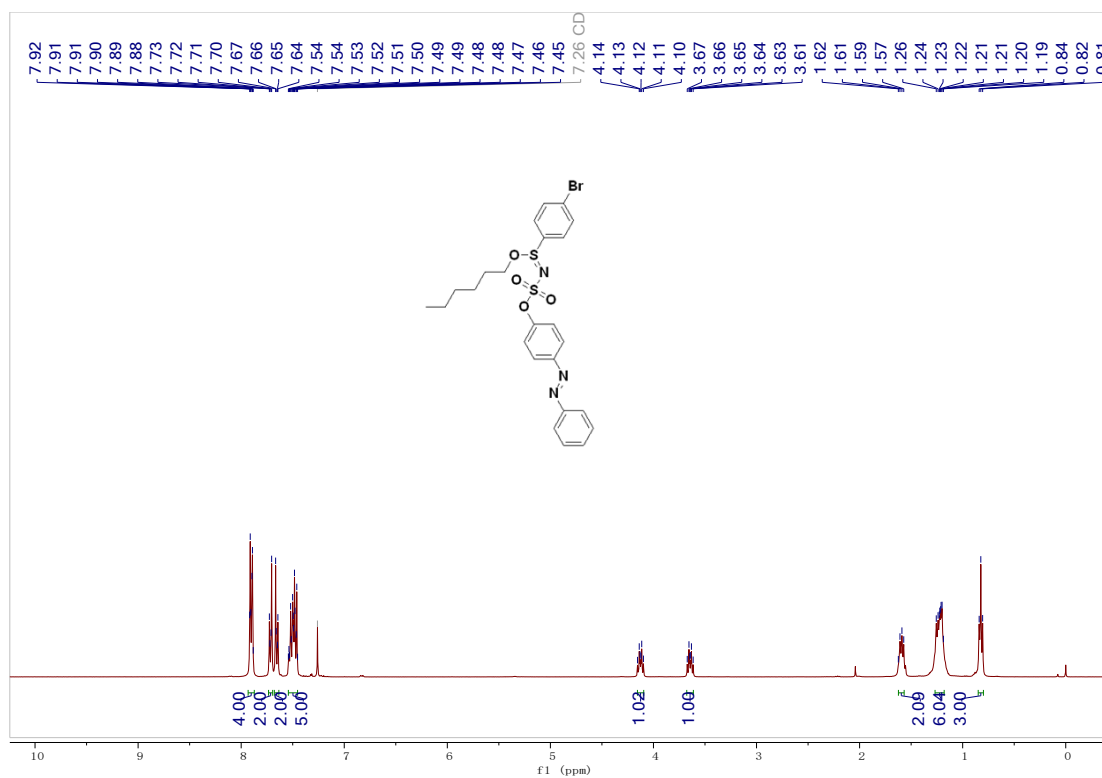

**<sup>13</sup>C NMR (100 MHz, Chloroform-*d*) of compound 4az**

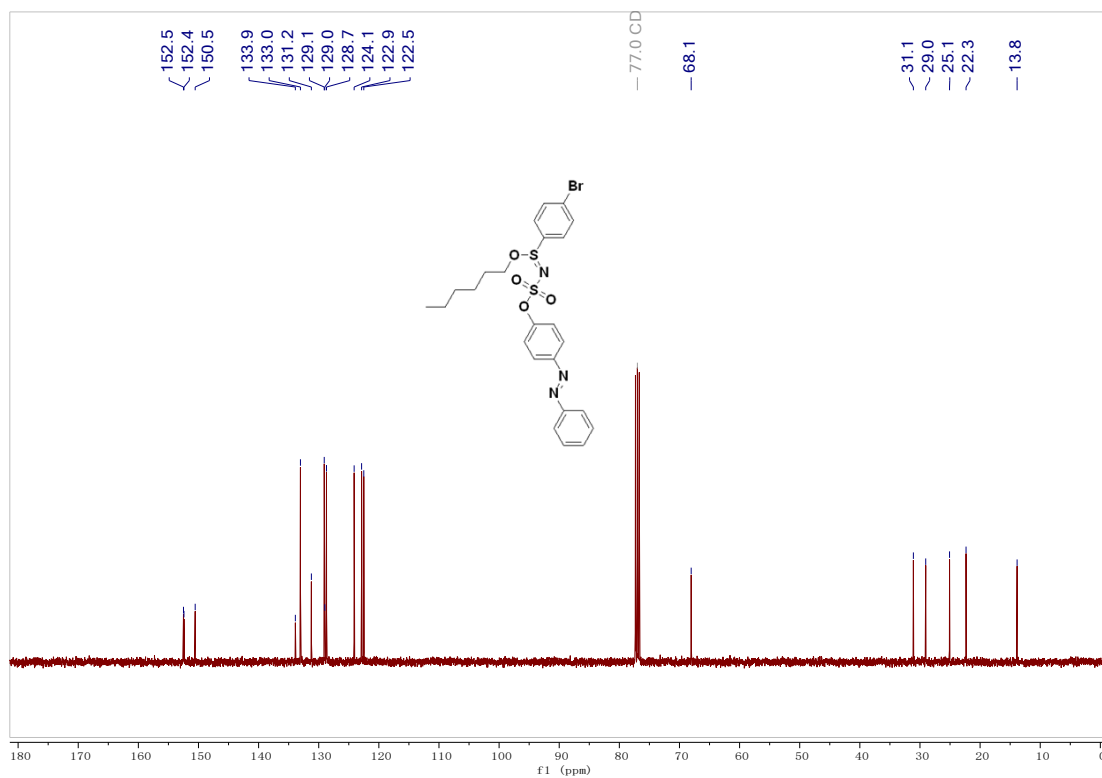



**<sup>1</sup>H NMR (400 MHz, Chloroform-*d*) of compound 4ba**

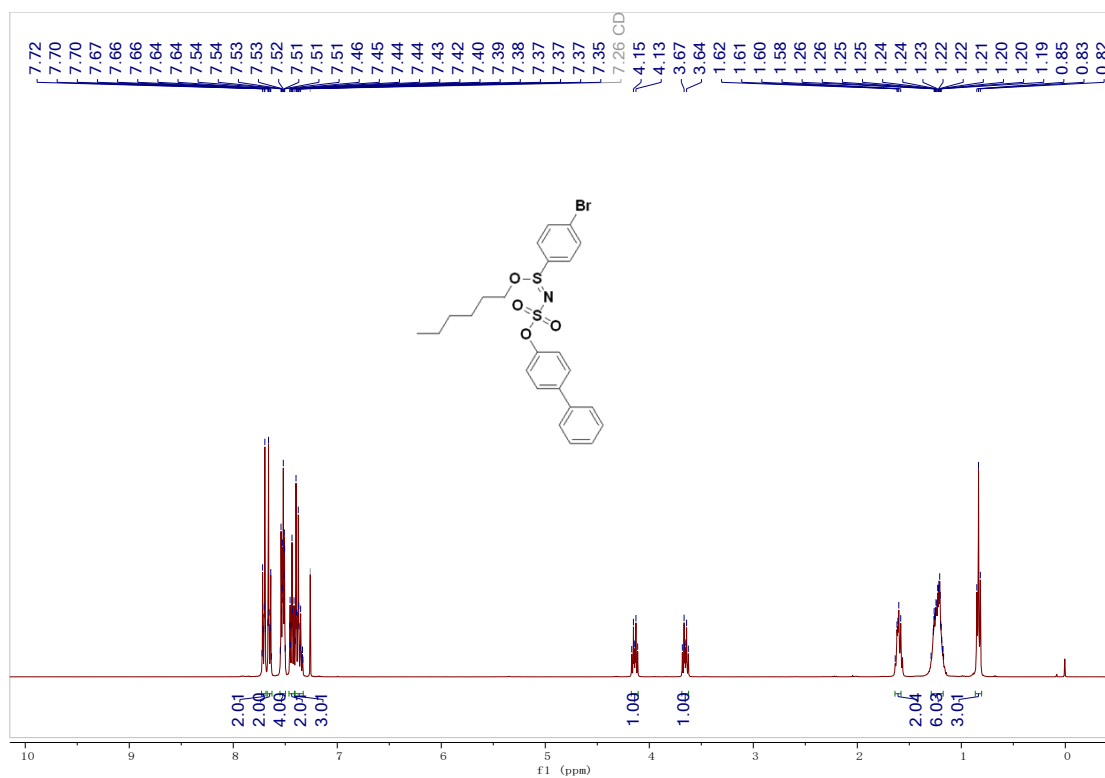

**<sup>13</sup>C NMR (100 MHz, Chloroform-*d*) of compound 4ba**

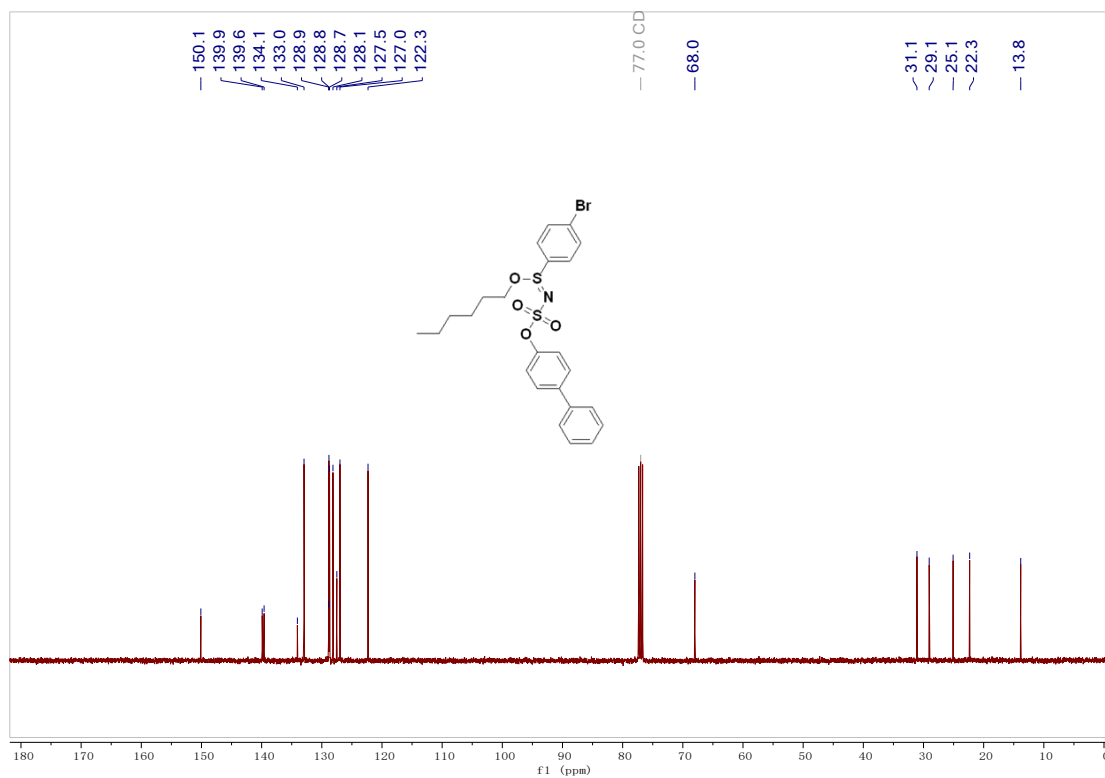

**<sup>1</sup>H NMR (400 MHz, Chloroform-*d*) of compound 4bb**

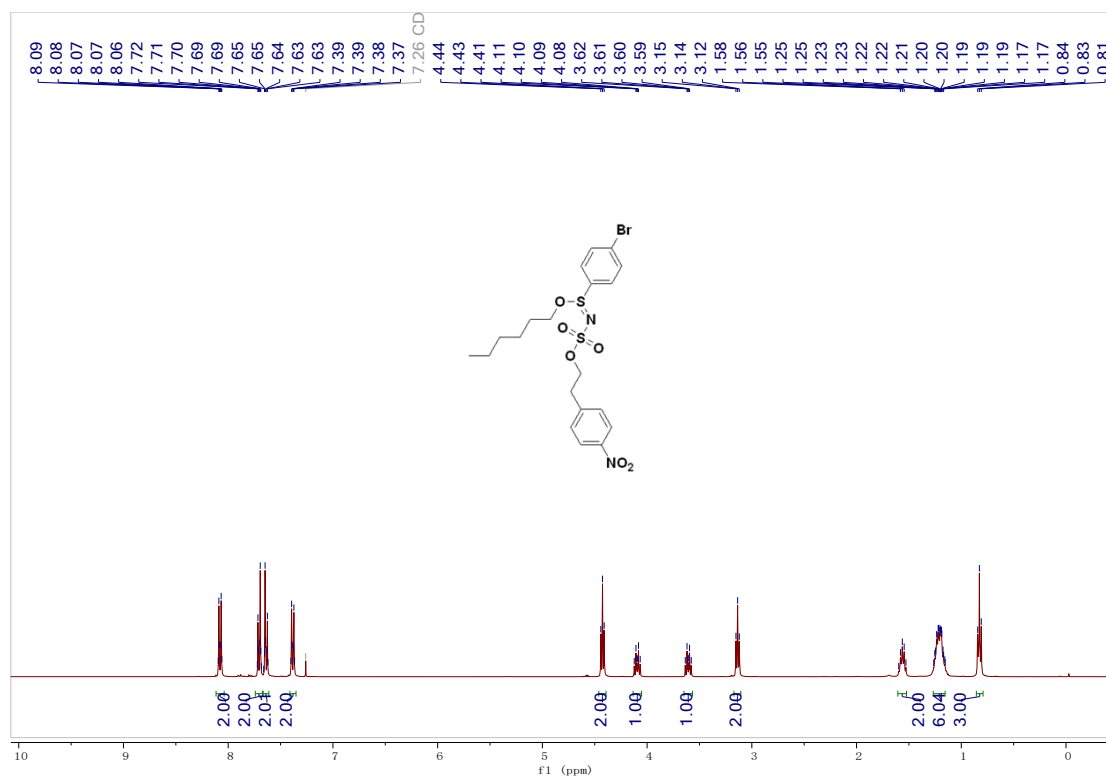

**<sup>13</sup>C NMR (100 MHz, Chloroform-*d*) of compound 4bb**

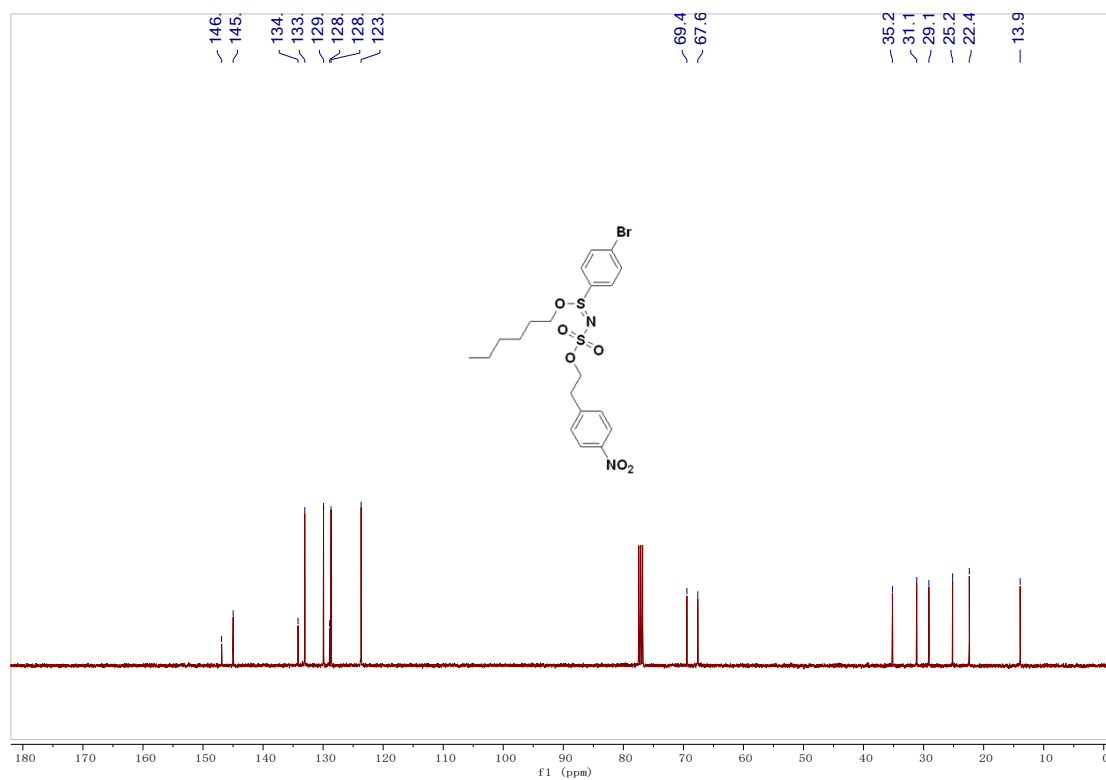

**<sup>1</sup>H NMR (400 MHz, Chloroform-*d*) of compound 4bc**

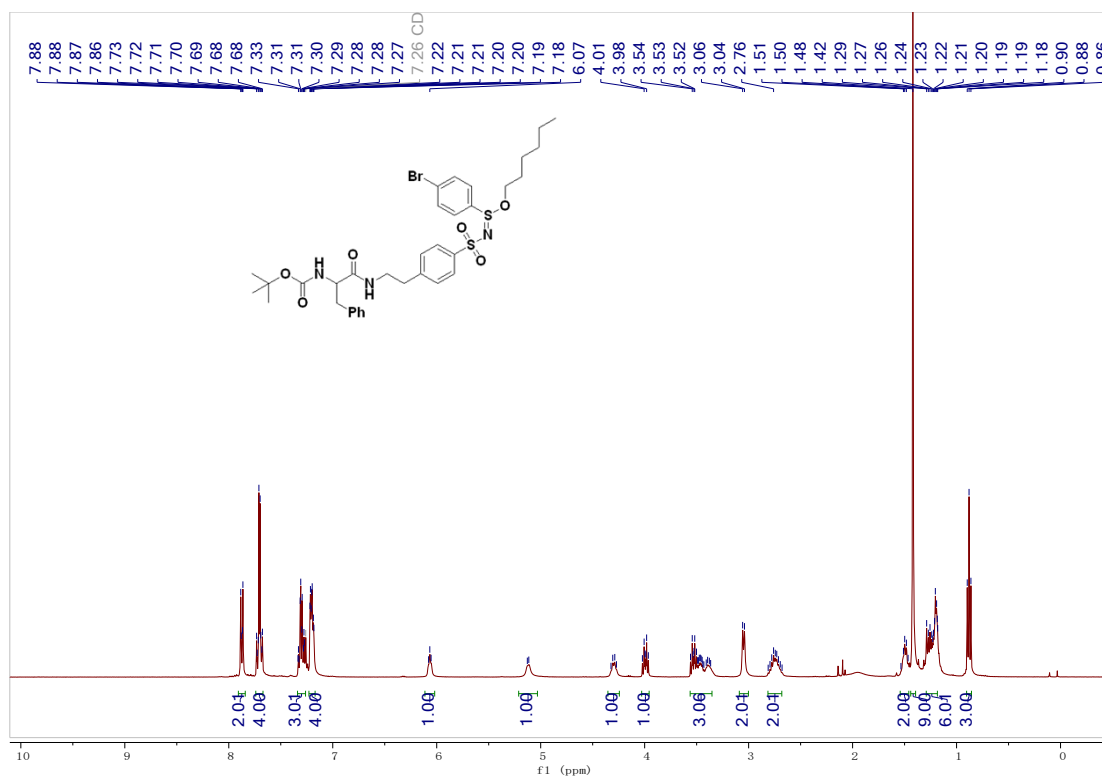

**<sup>13</sup>C NMR (100 MHz, Chloroform-*d*) of compound 4bc**

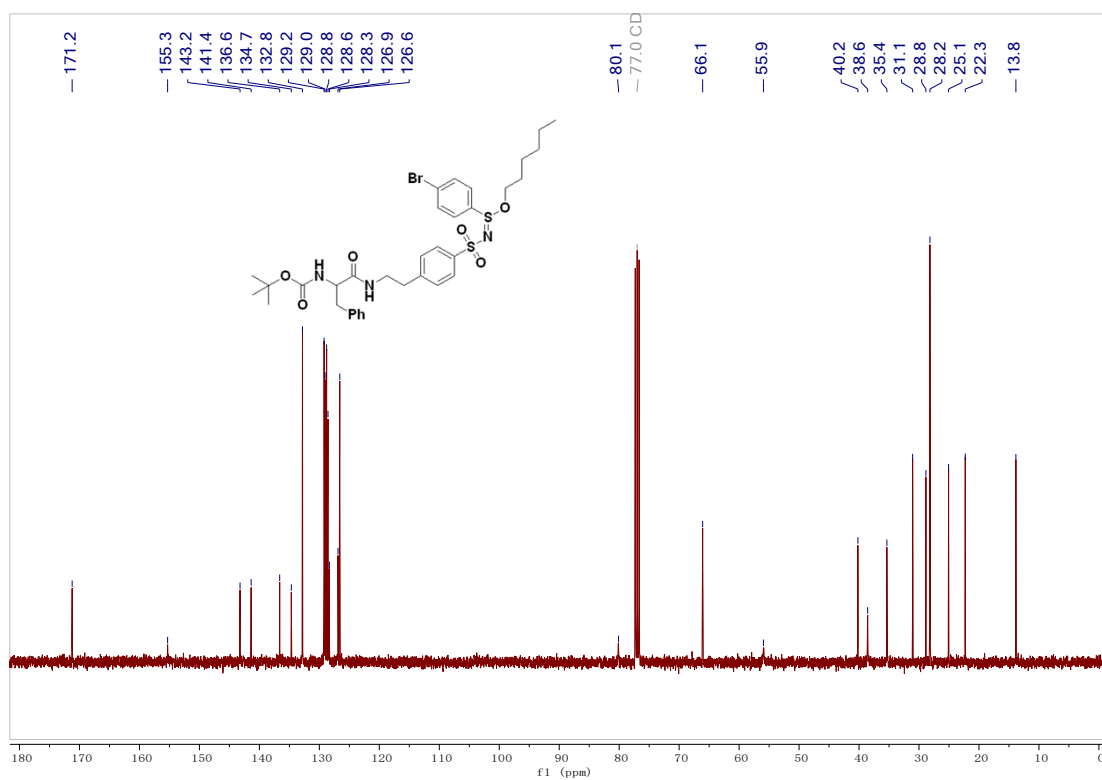

**<sup>1</sup>H NMR (400 MHz, Chloroform-*d*) of compound 4bd**

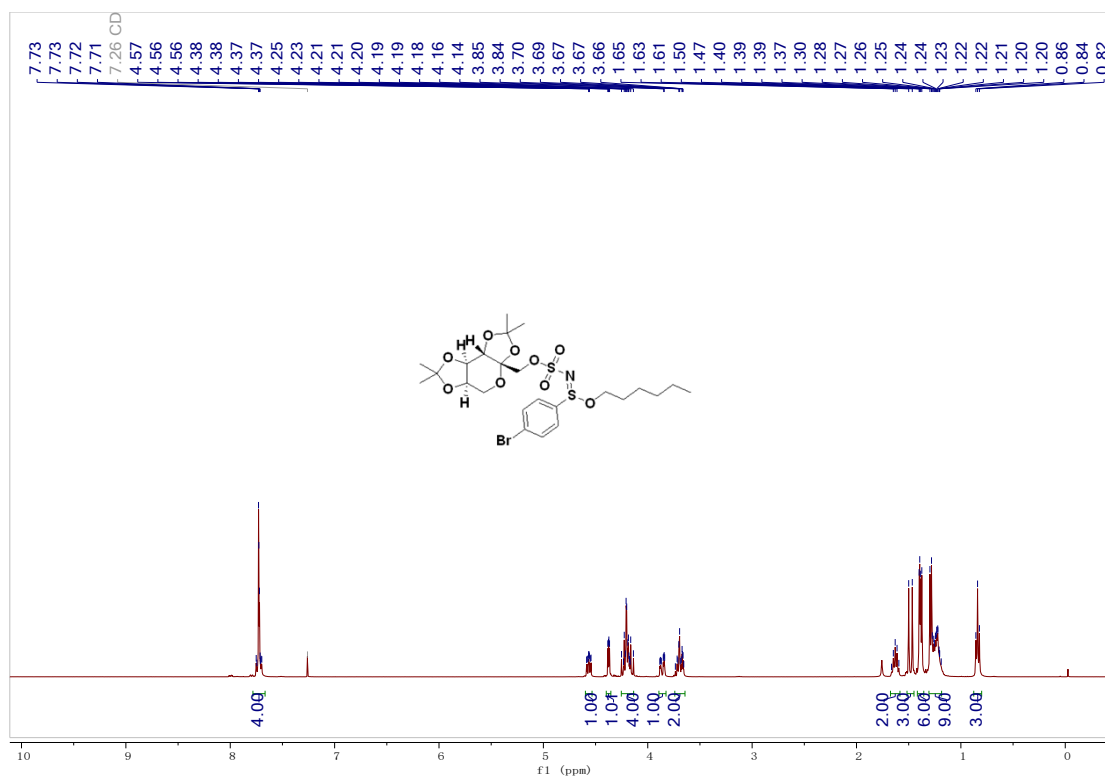

**<sup>13</sup>C NMR (100 MHz, Chloroform-*d*) of compound 4bd**

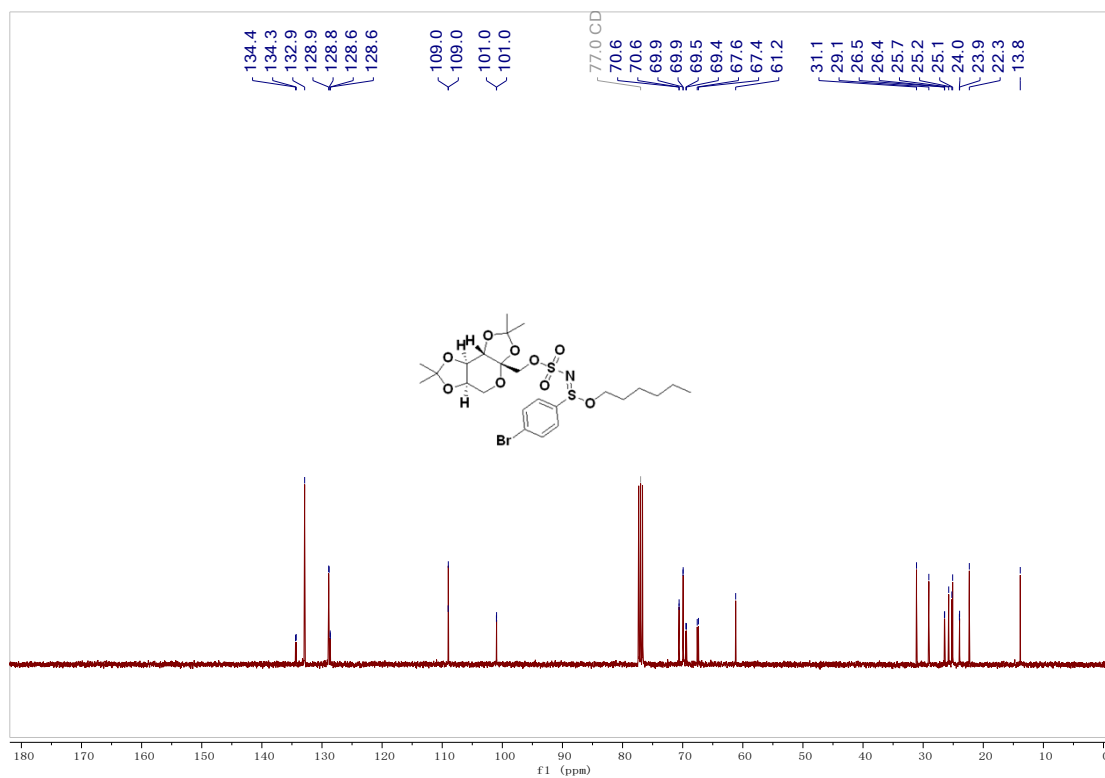

**<sup>1</sup>H NMR (400 MHz, Chloroform-*d*) of compound 4be**

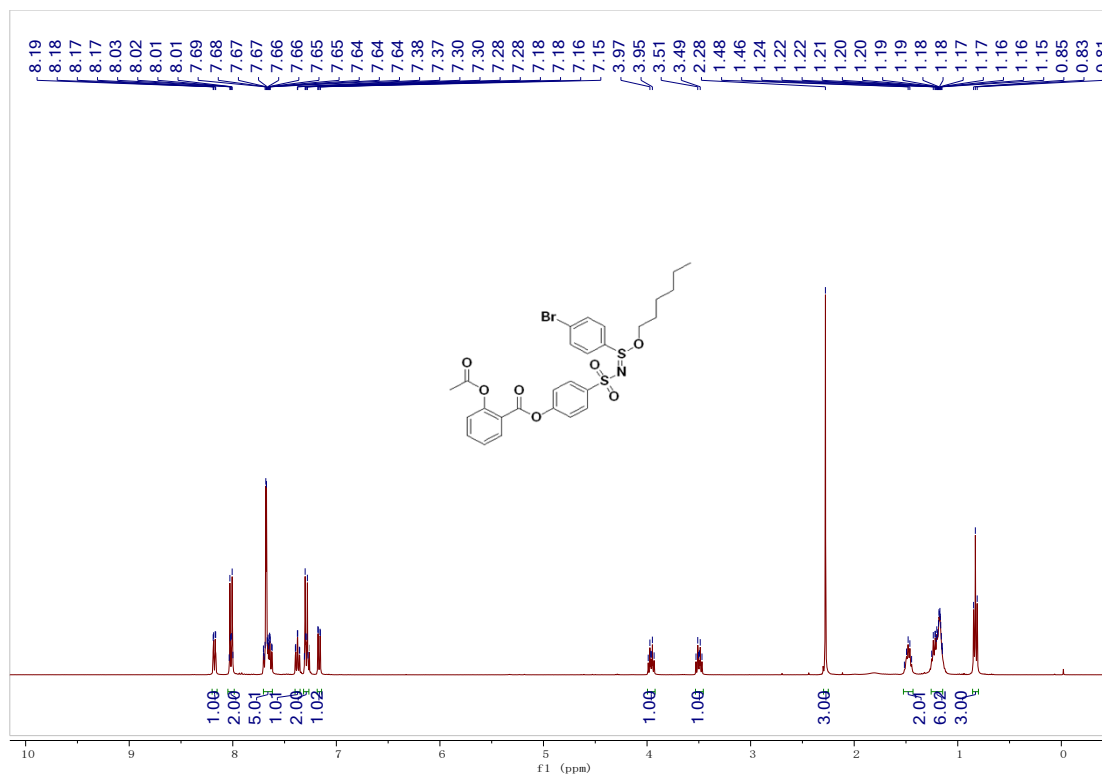

**<sup>13</sup>C NMR (100 MHz, Chloroform-*d*) of compound 4be**

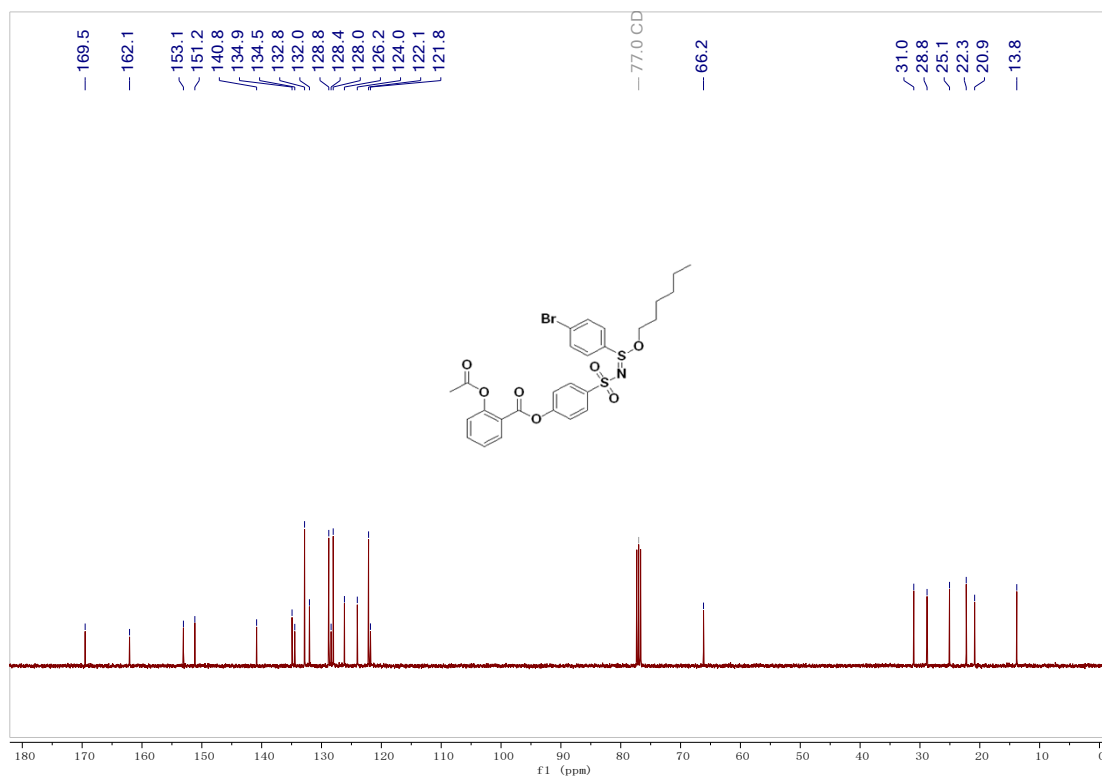

**<sup>1</sup>H NMR (400 MHz, Chloroform-*d*) of compound 4bf**

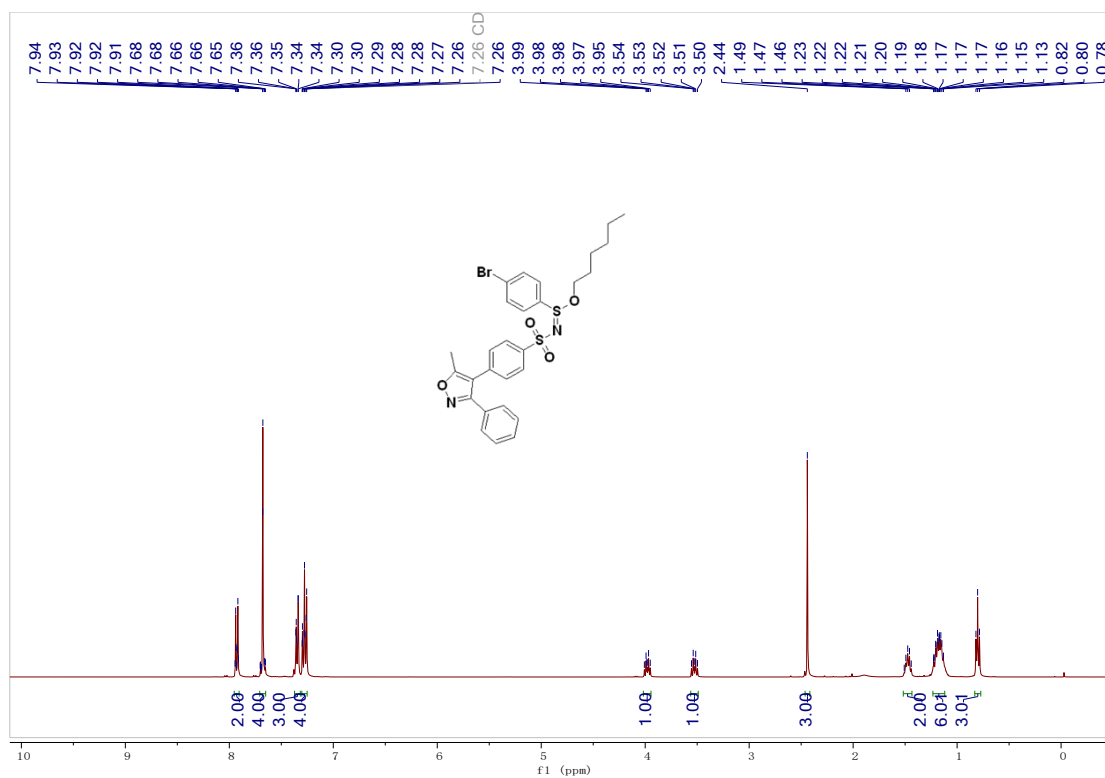

**<sup>13</sup>C NMR (100 MHz, Chloroform-*d*) of compound 4bf**

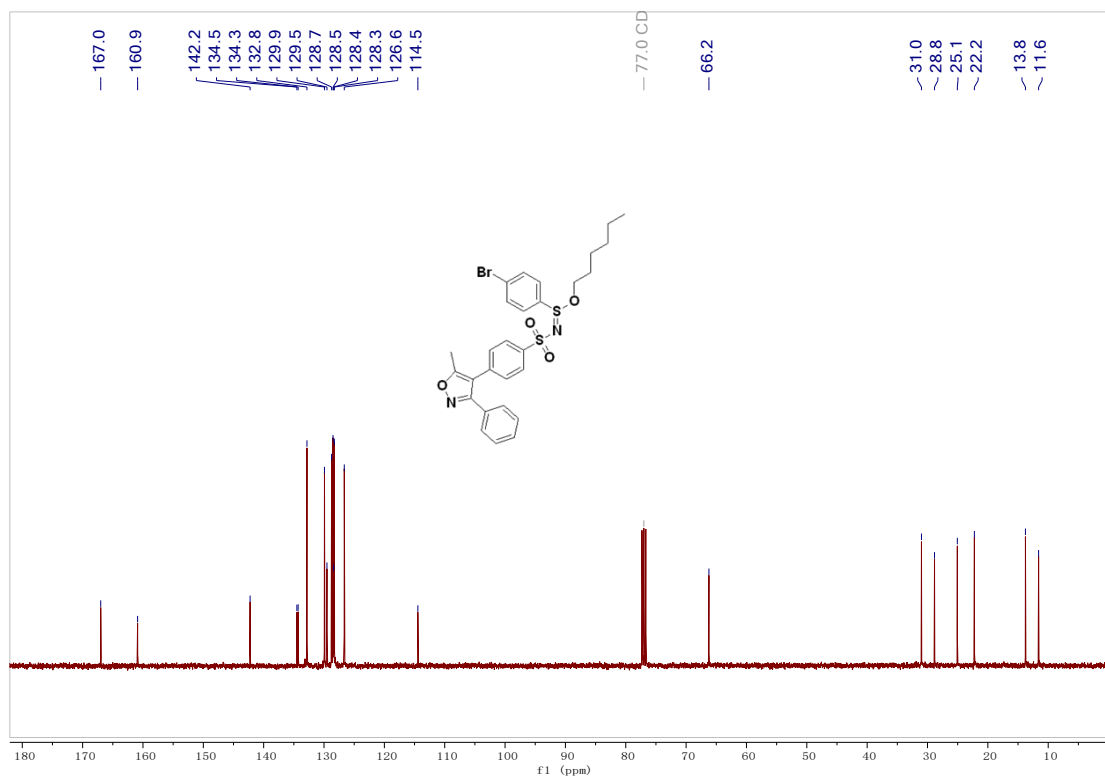

**<sup>1</sup>H NMR (400 MHz, Chloroform-*d*) of compound 4bg**

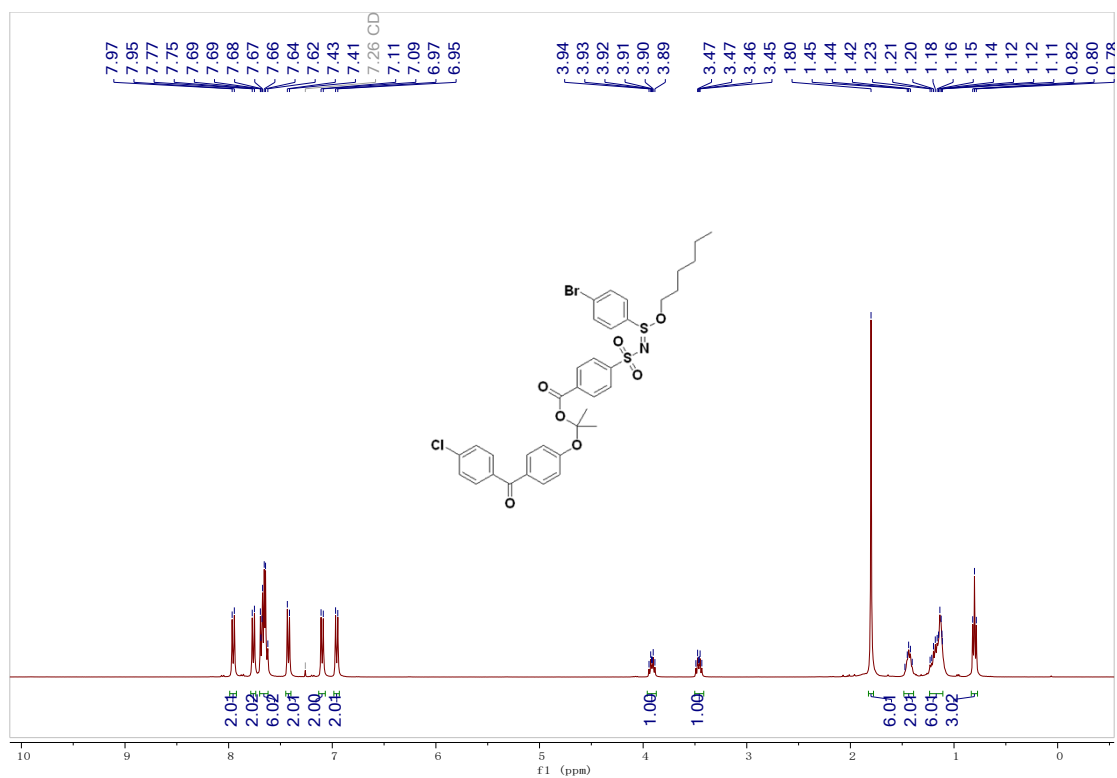

**<sup>13</sup>C NMR (100 MHz, Chloroform-*d*) of compound 4bg**

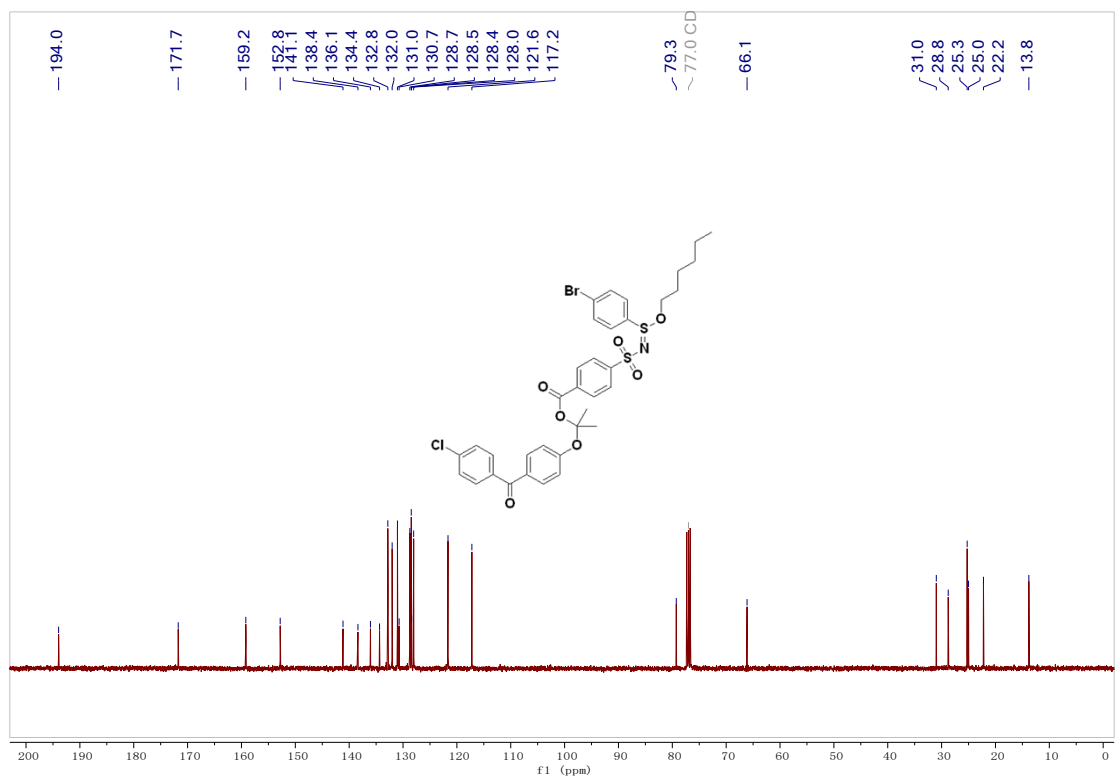

**<sup>1</sup>H NMR (400 MHz, Chloroform-*d*) of compound 4bh**

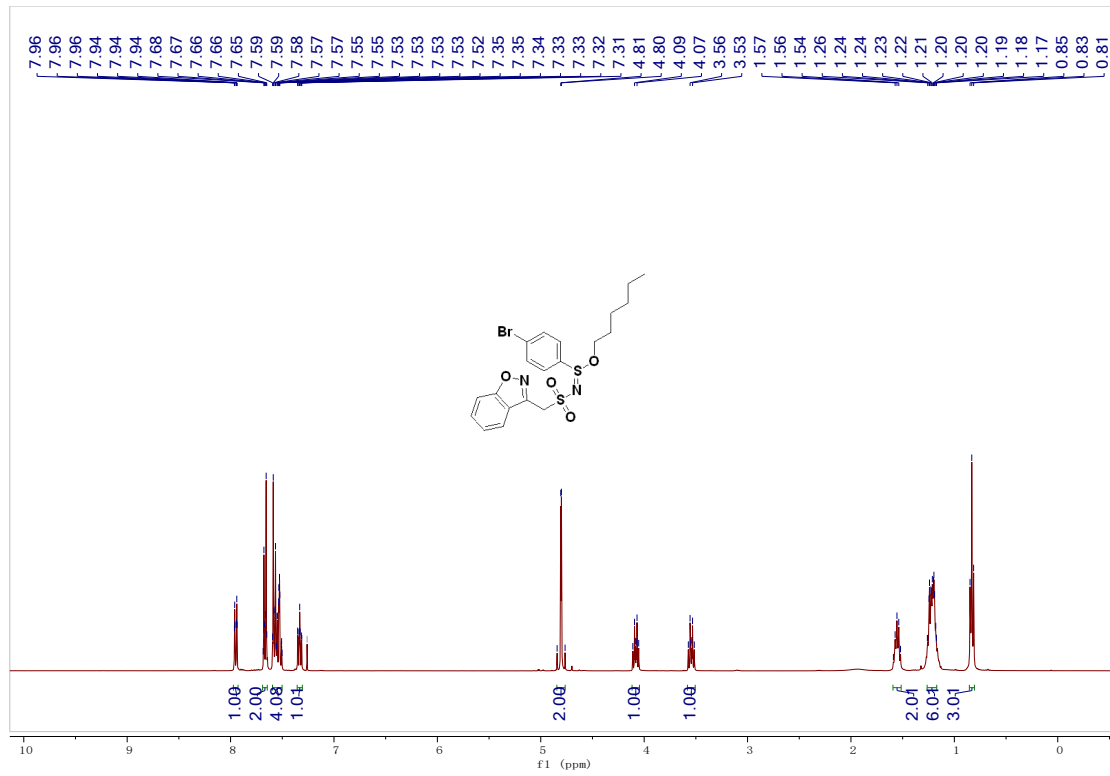

**<sup>13</sup>C NMR (100 MHz, Chloroform-*d*) of compound 4bh**

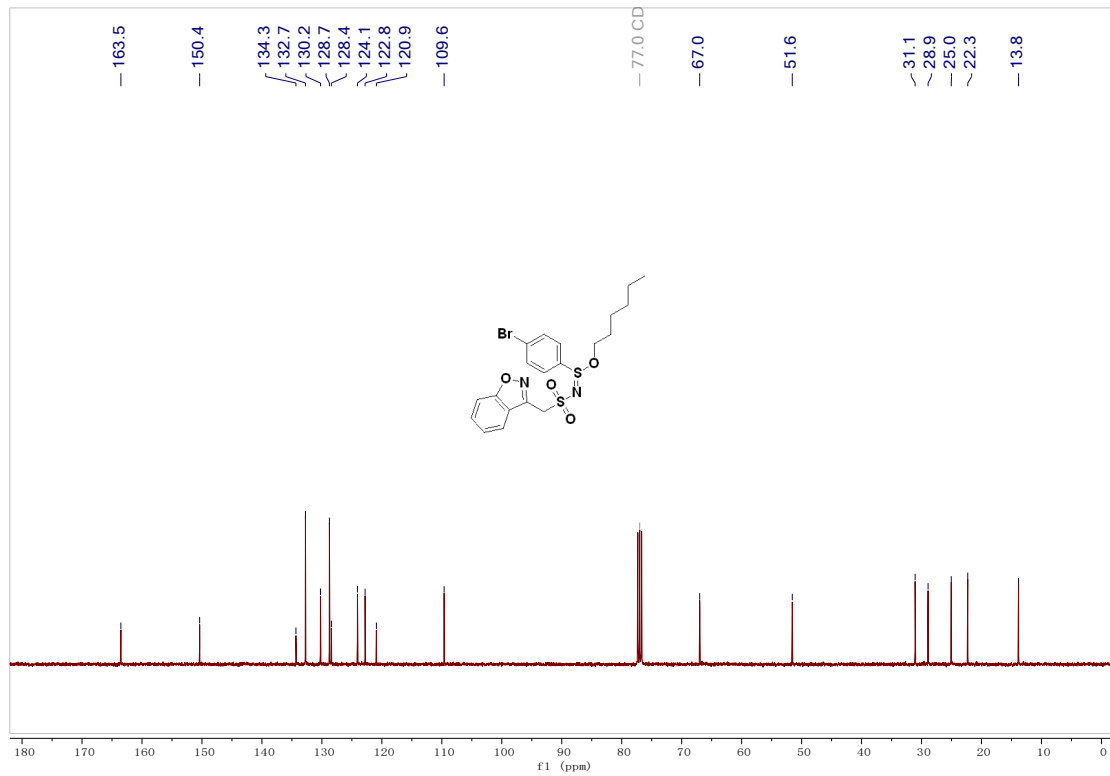



**<sup>1</sup>H NMR (400 MHz, Chloroform-*d*) of compound 4bi**

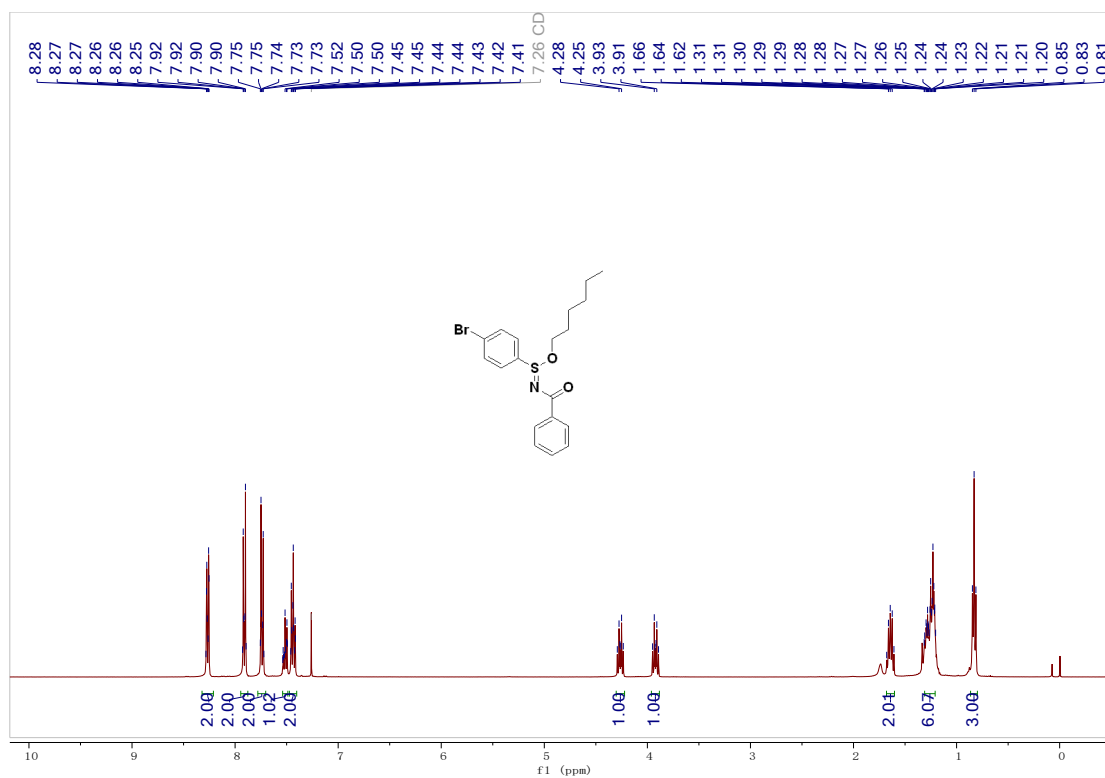

**<sup>13</sup>C NMR (100 MHz, Chloroform-*d*) of compound 4bi**

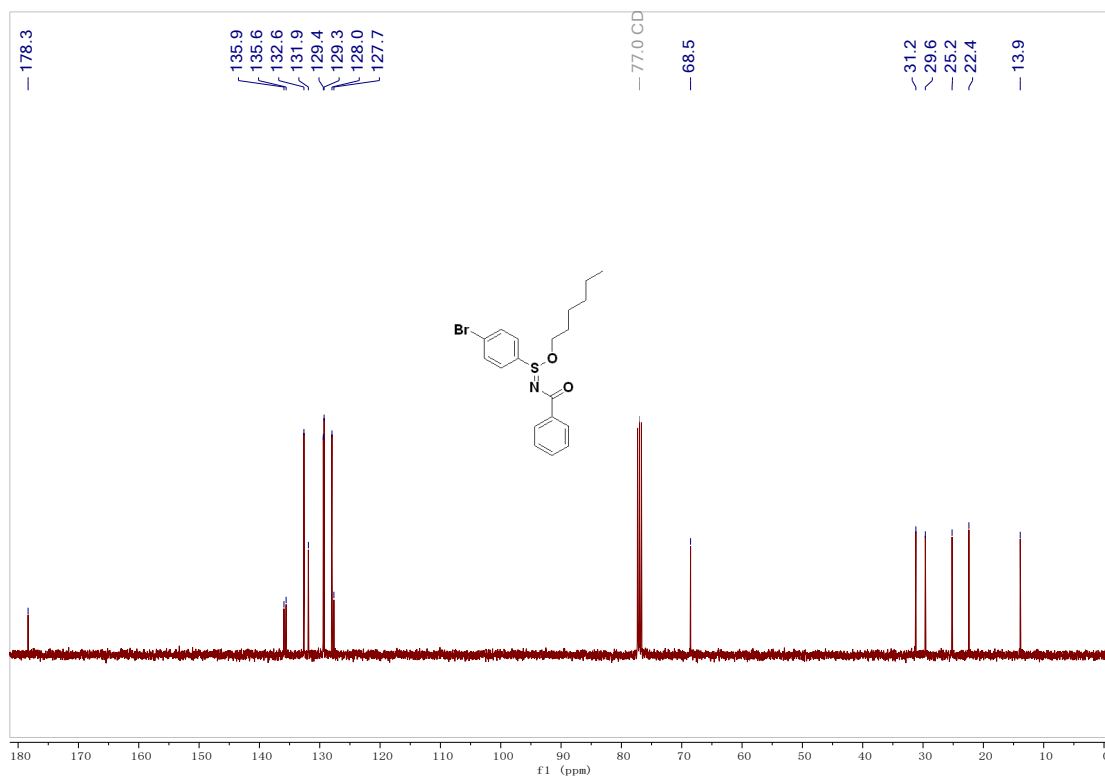

**<sup>1</sup>H NMR (400 MHz, Chloroform-*d*) of compound 4b<sub>j</sub>**

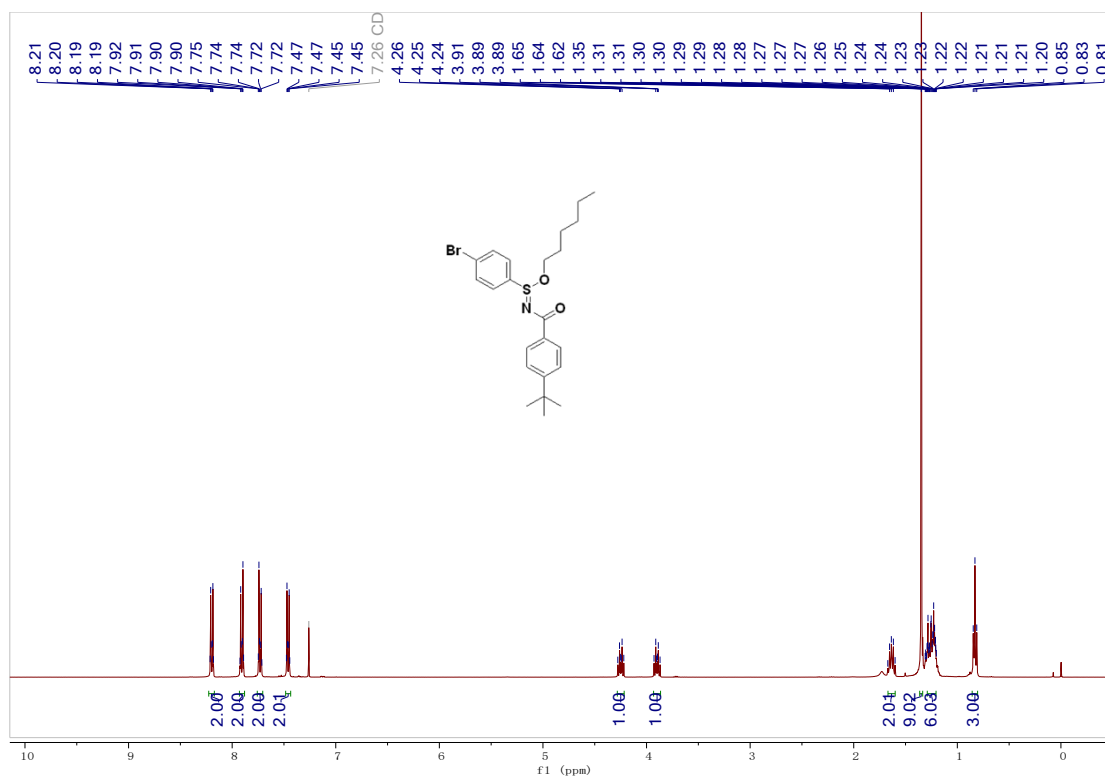

**<sup>13</sup>C NMR (100 MHz, Chloroform-*d*) of compound 4b<sub>j</sub>**

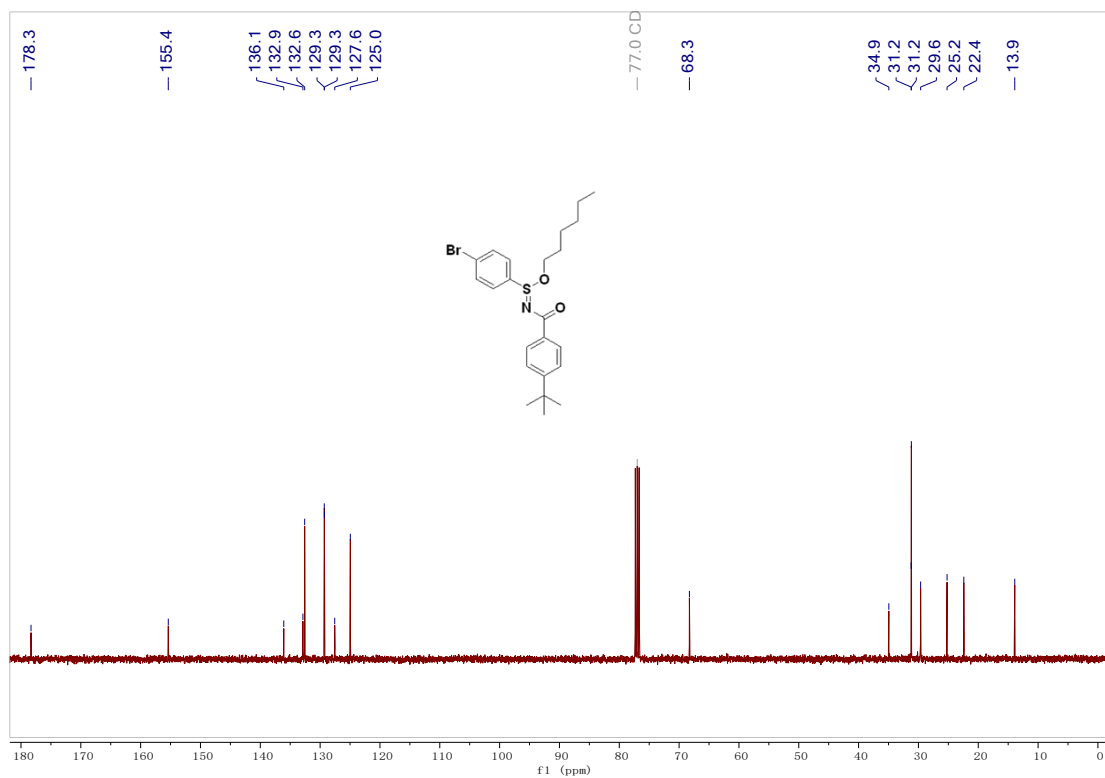

**<sup>1</sup>H NMR (400 MHz, Chloroform-*d*) of compound 4bk**

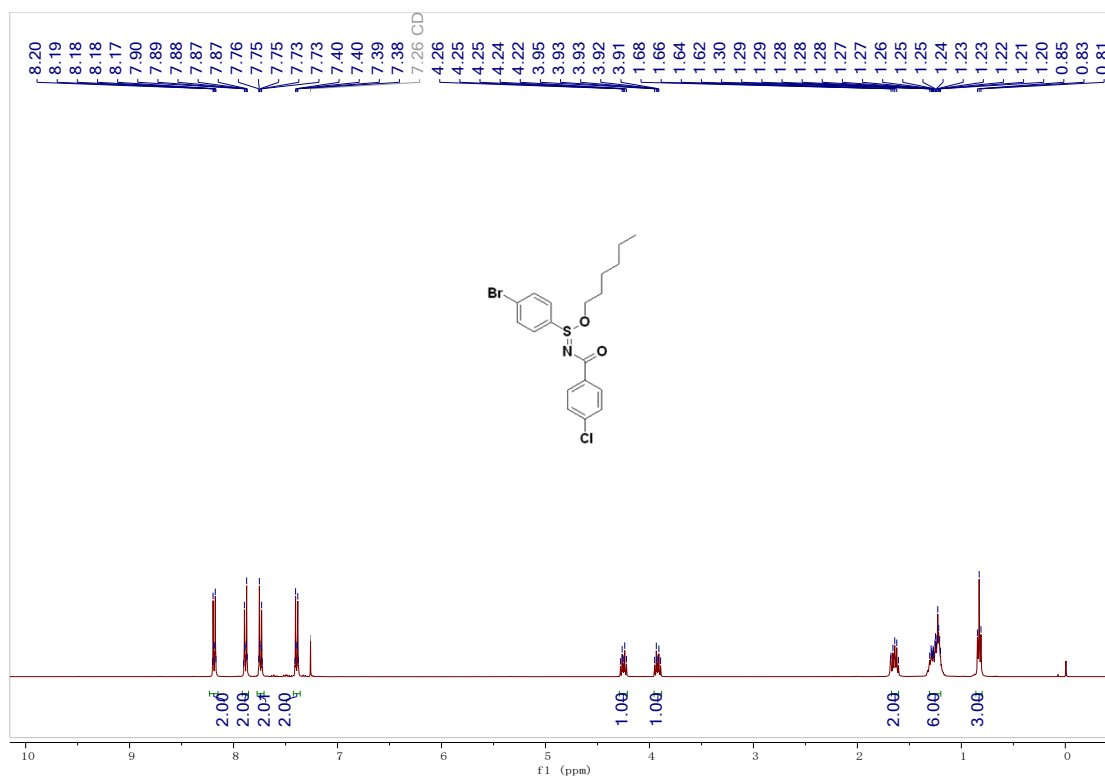

**<sup>13</sup>C NMR (100 MHz, Chloroform-*d*) of compound 4bk**

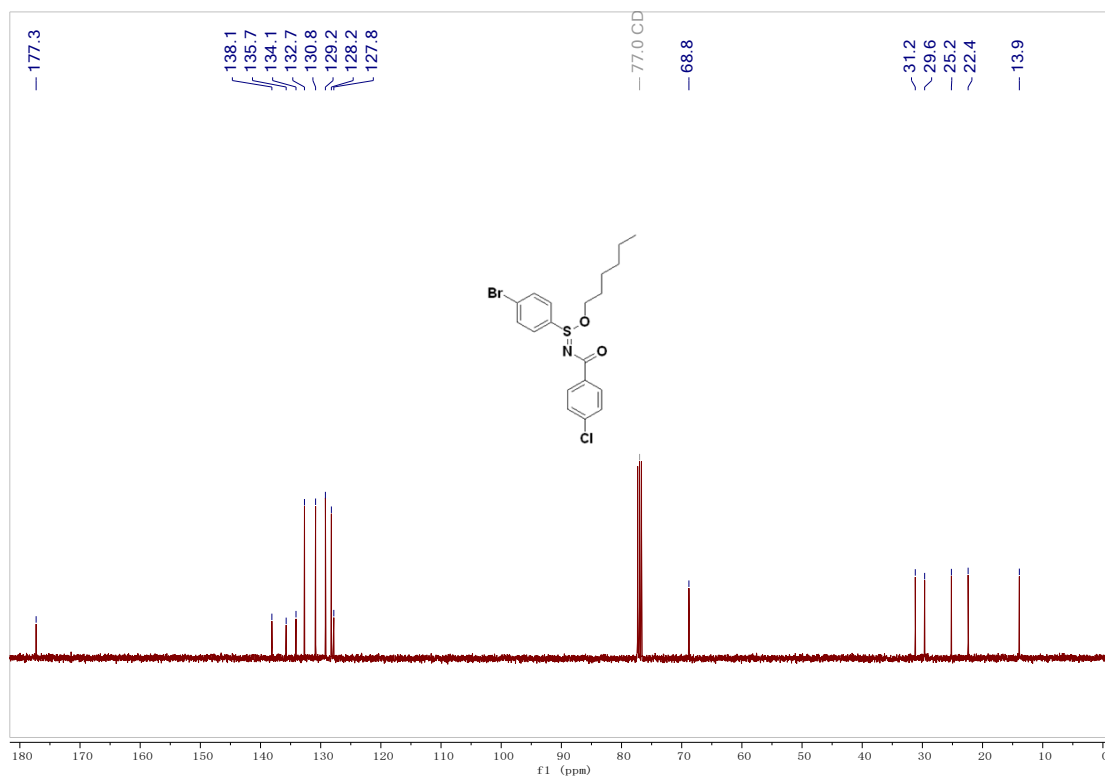

**<sup>1</sup>H NMR (400 MHz, Chloroform-*d*) of compound 4b1**

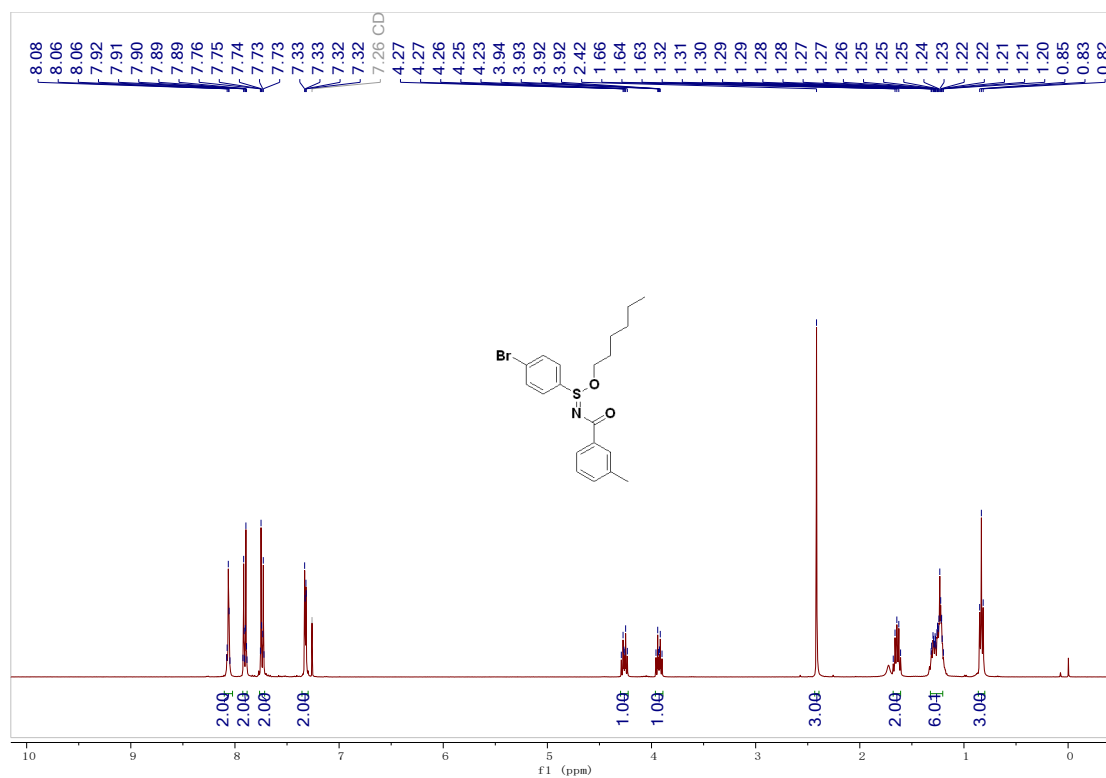

**<sup>13</sup>C NMR (100 MHz, Chloroform-*d*) of compound 4b1**

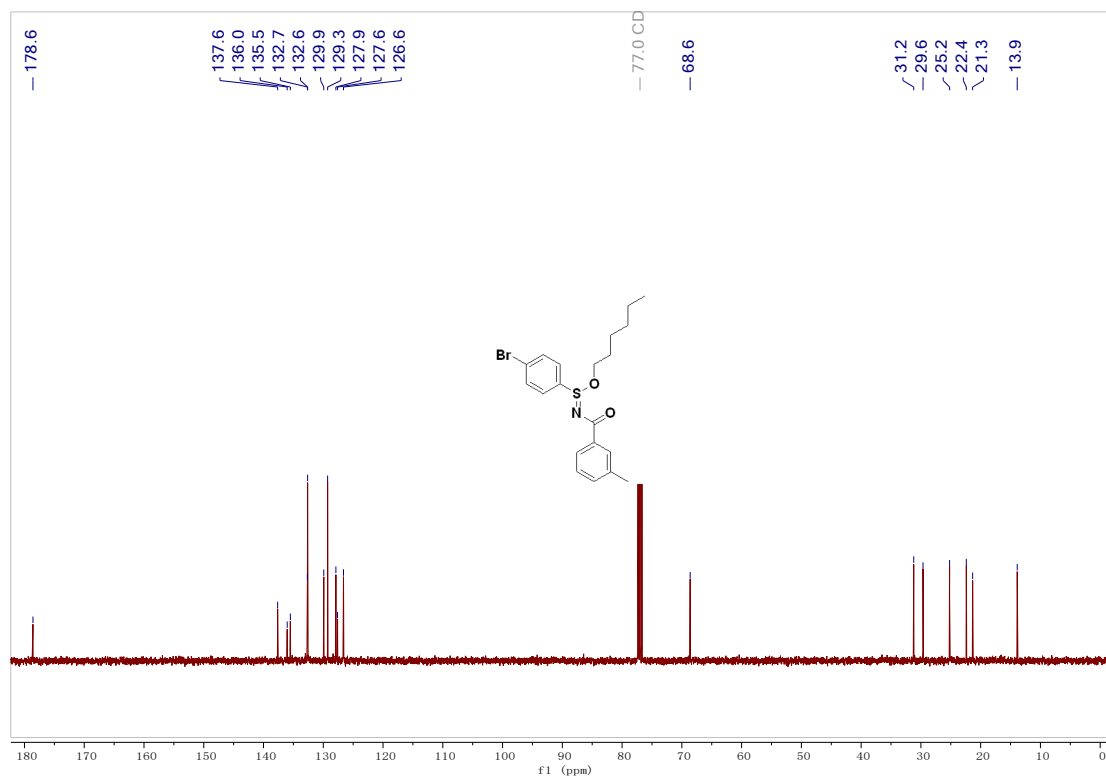

**<sup>1</sup>H NMR (400 MHz, Chloroform-*d*) of compound 4bm**

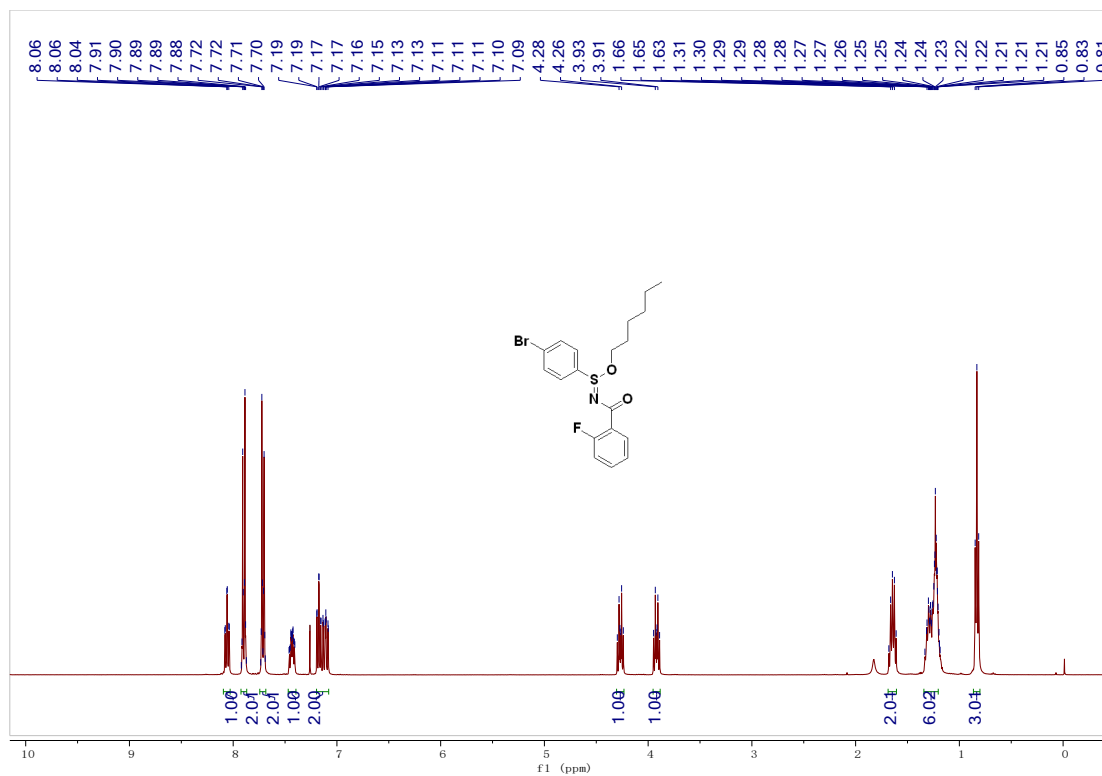

**<sup>13</sup>C NMR (100 MHz, Chloroform-*d*) of compound 4bm**

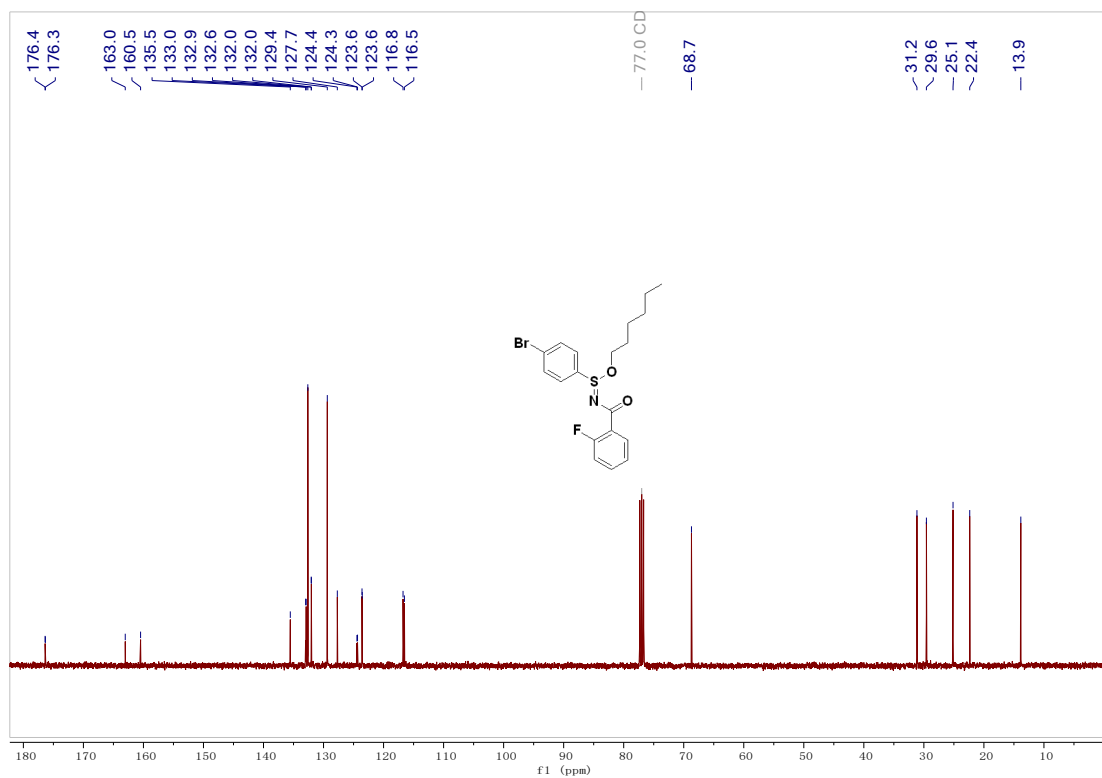

**<sup>19</sup>F NMR (376 MHz, Chloroform-d) of compound 4bm**

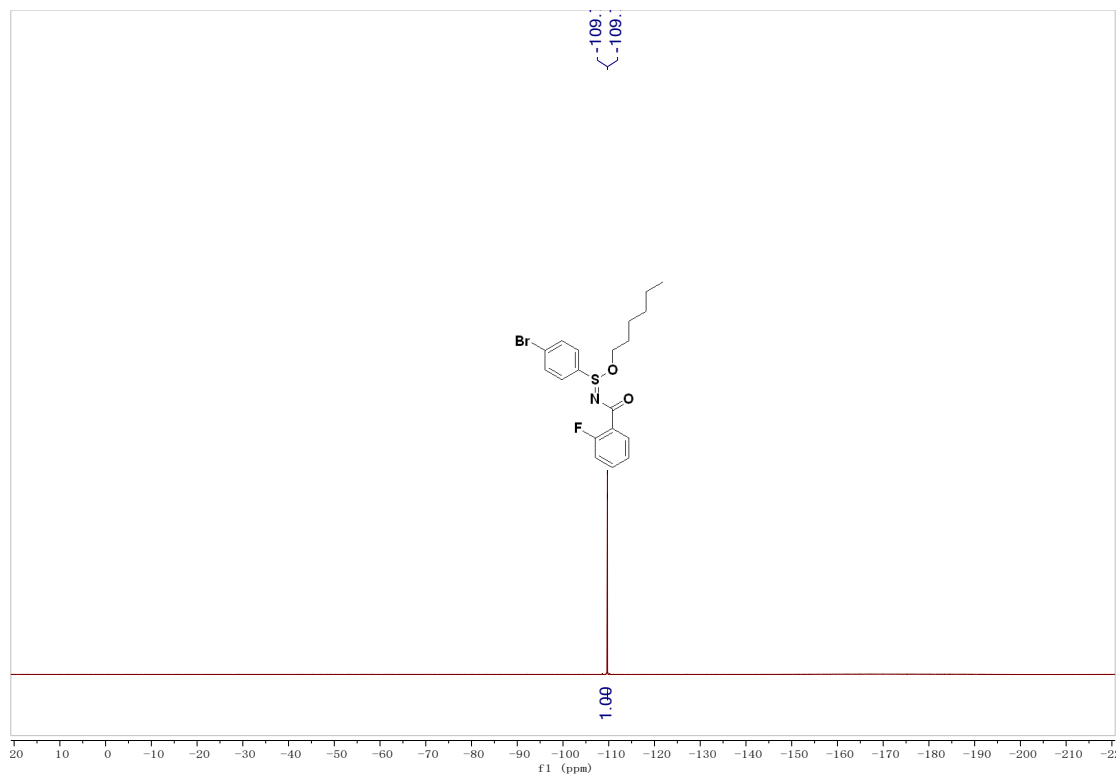

**<sup>1</sup>H NMR (400 MHz, Chloroform-d) of compound 4bn**

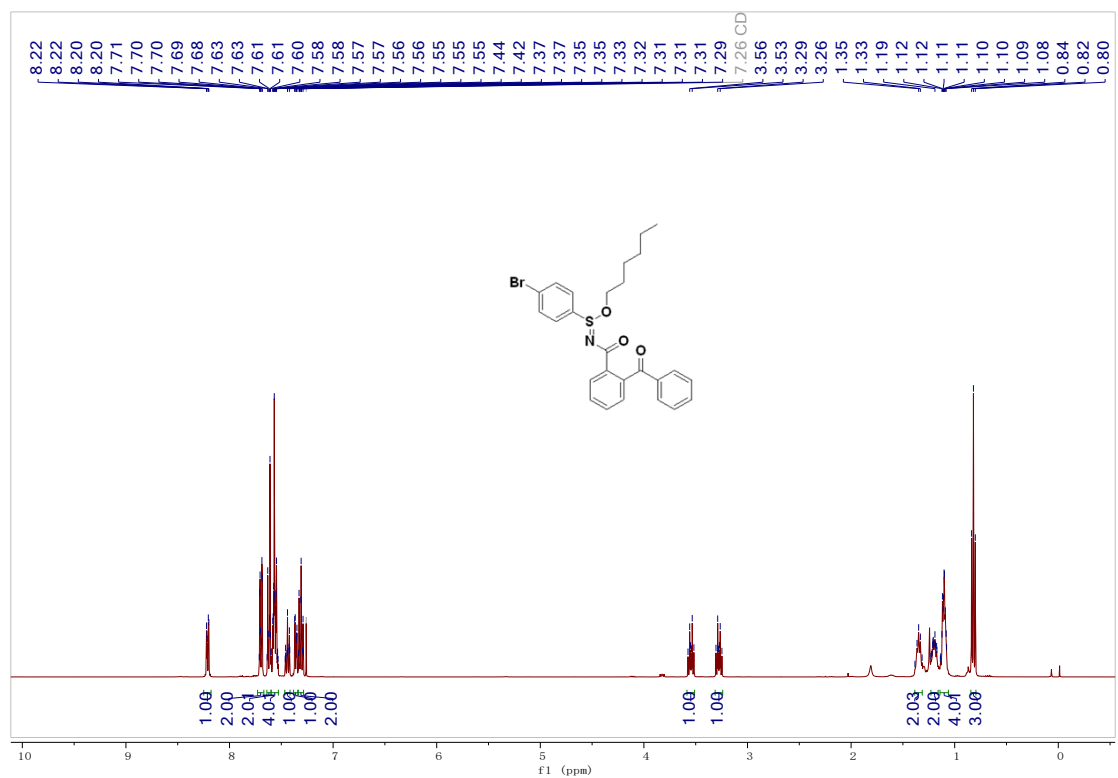

**<sup>13</sup>C NMR (100 MHz, Chloroform-*d*) of compound 4bn**

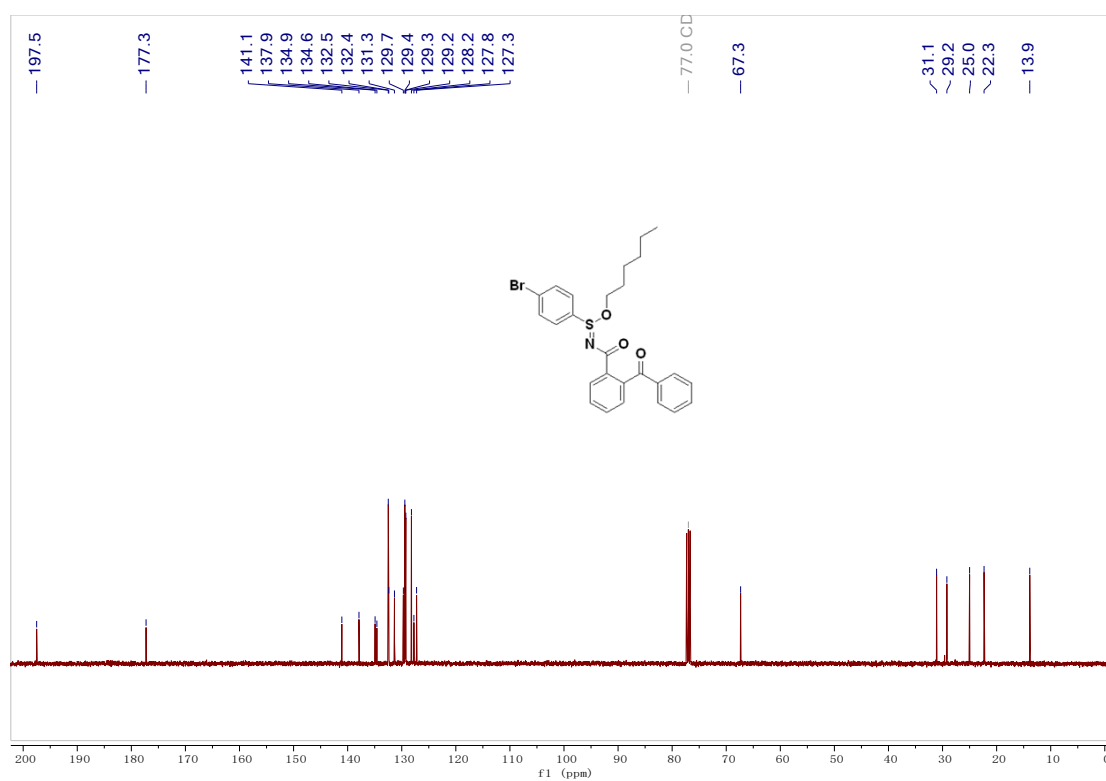

**<sup>1</sup>H NMR (400 MHz, Chloroform-*d*) of compound 4bo**

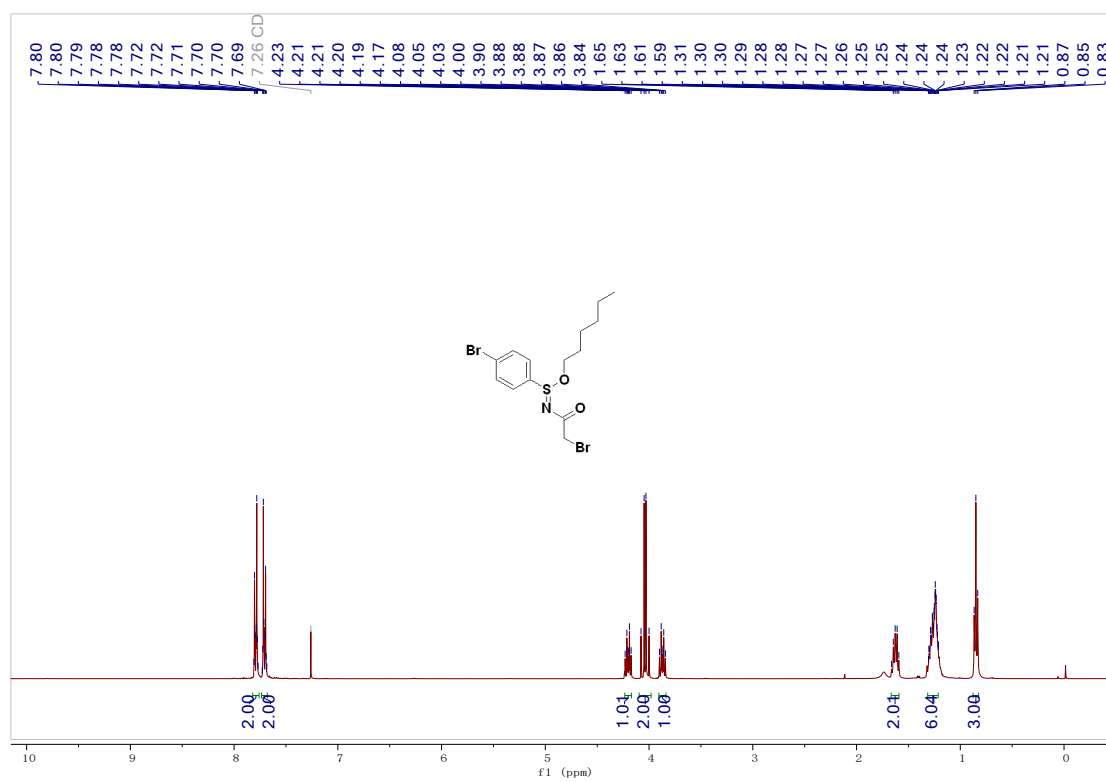

**<sup>13</sup>C NMR (100 MHz, Chloroform-*d*) of compound 4bo**

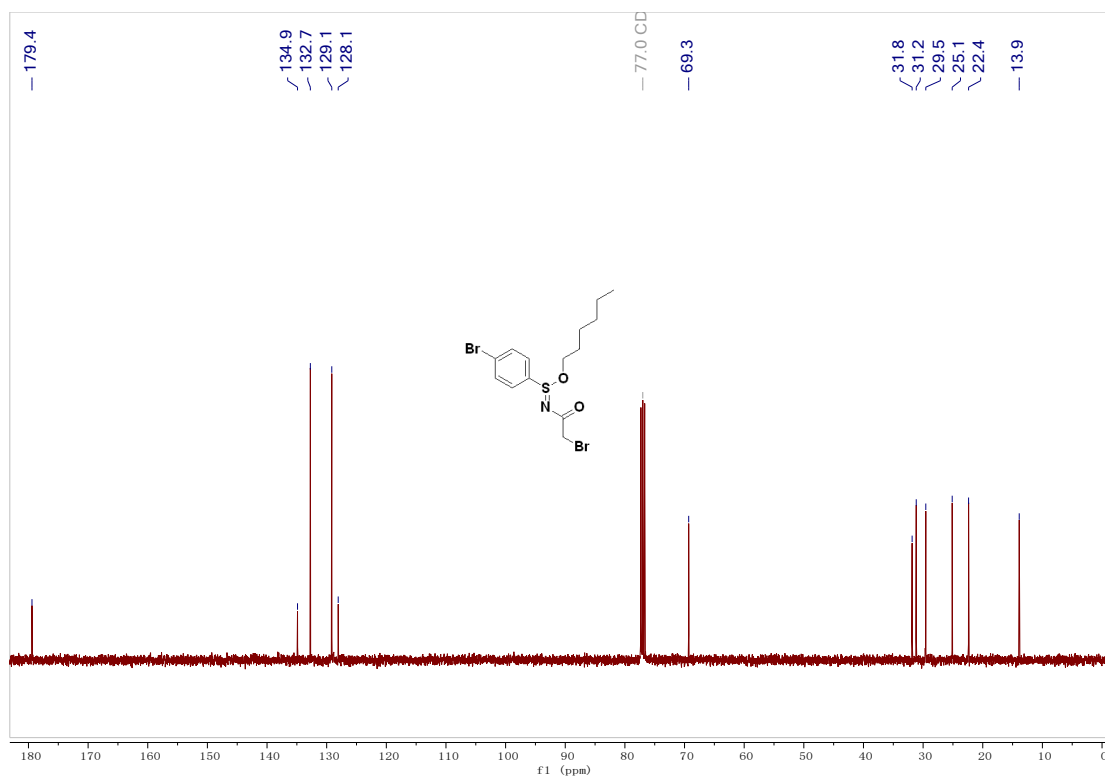

**<sup>1</sup>H NMR (400 MHz, Chloroform-*d*) of compound 4bp**

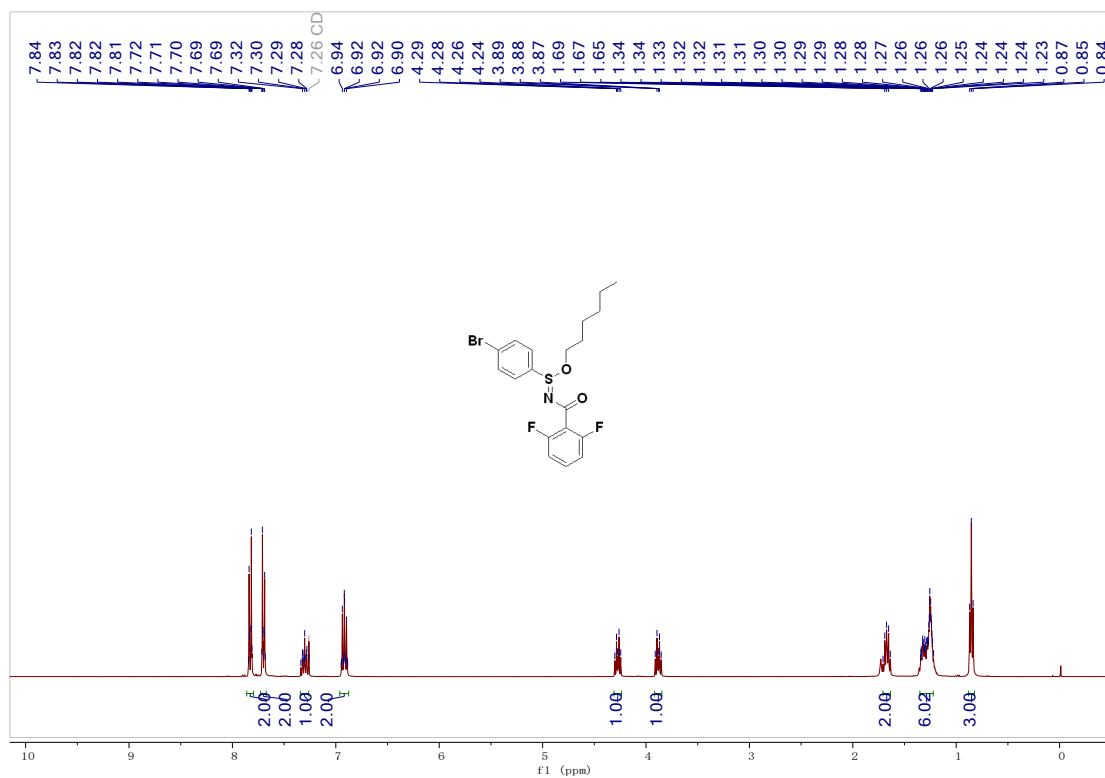



**<sup>13</sup>C NMR (100 MHz, Chloroform-*d*) of compound 4bp**

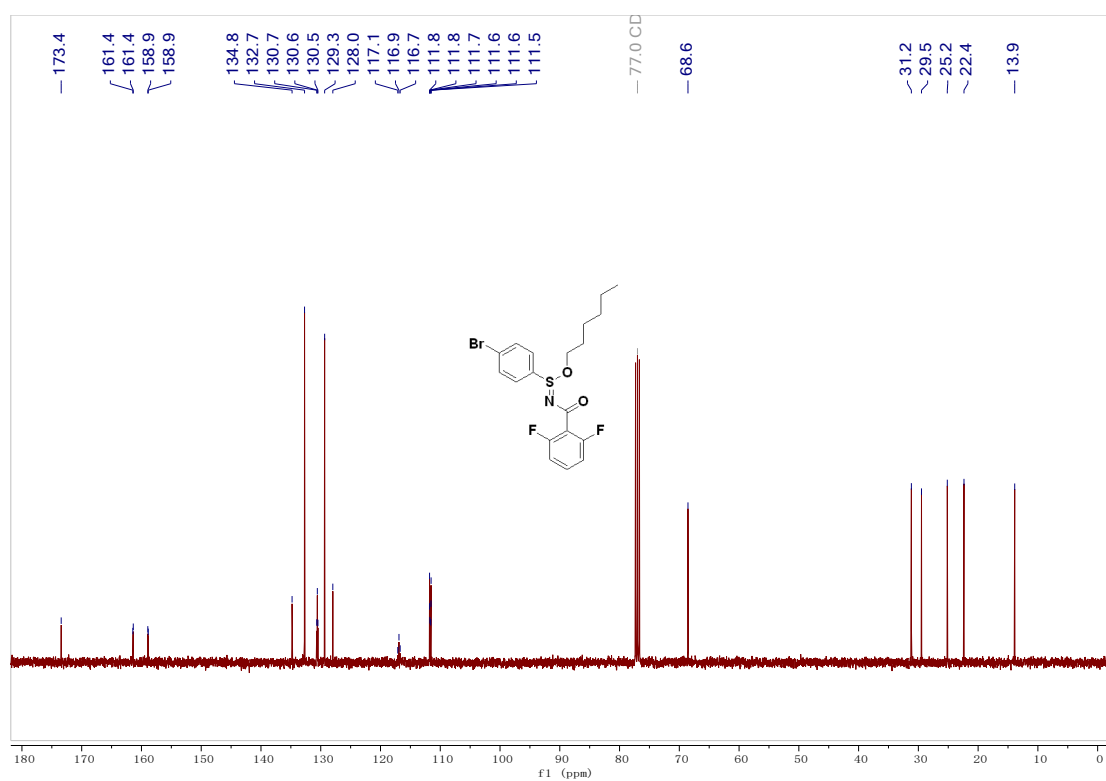

**<sup>19</sup>F NMR (376 MHz, Chloroform-*d*) of compound 4bp**

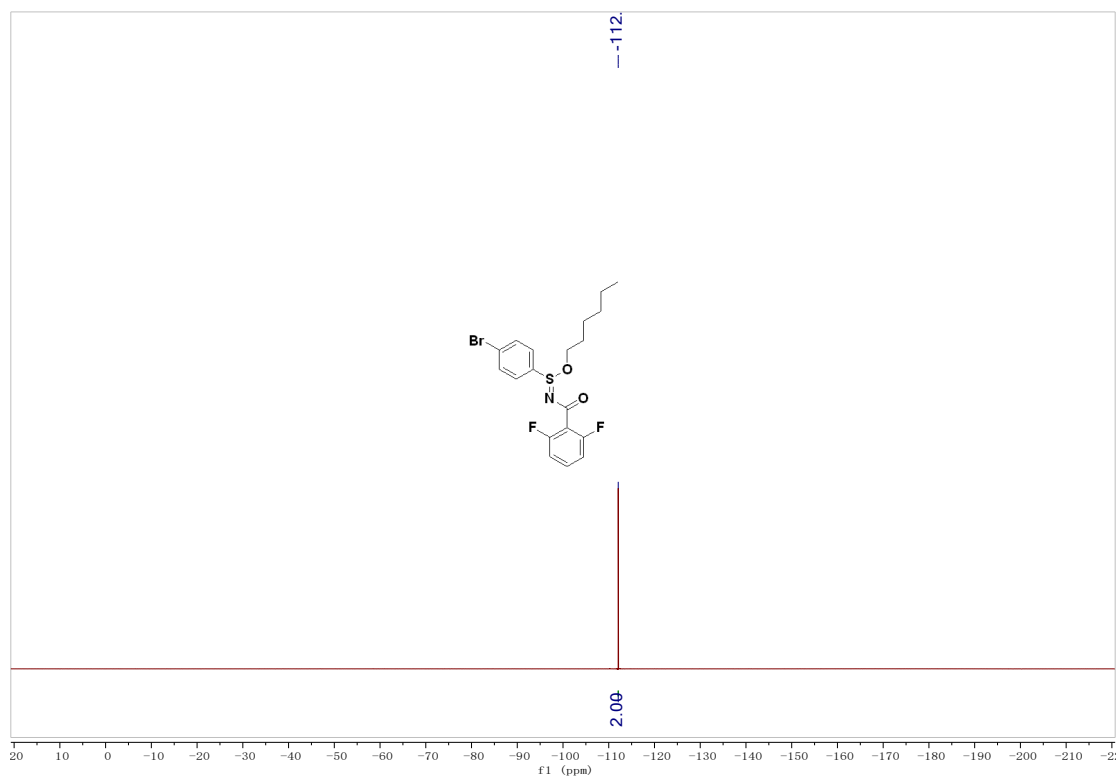

**<sup>1</sup>H NMR (400 MHz, Chloroform-*d*) of compound 4bq**

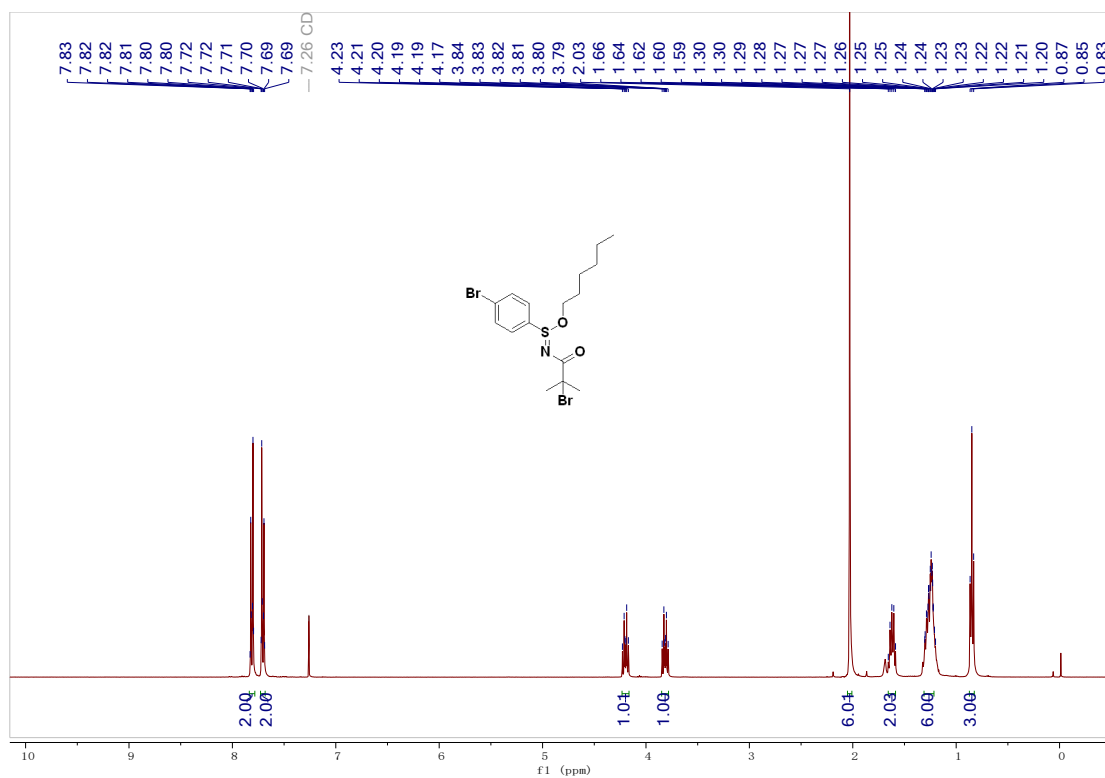

**<sup>13</sup>C NMR (100 MHz, Chloroform-*d*) of compound 4bq**

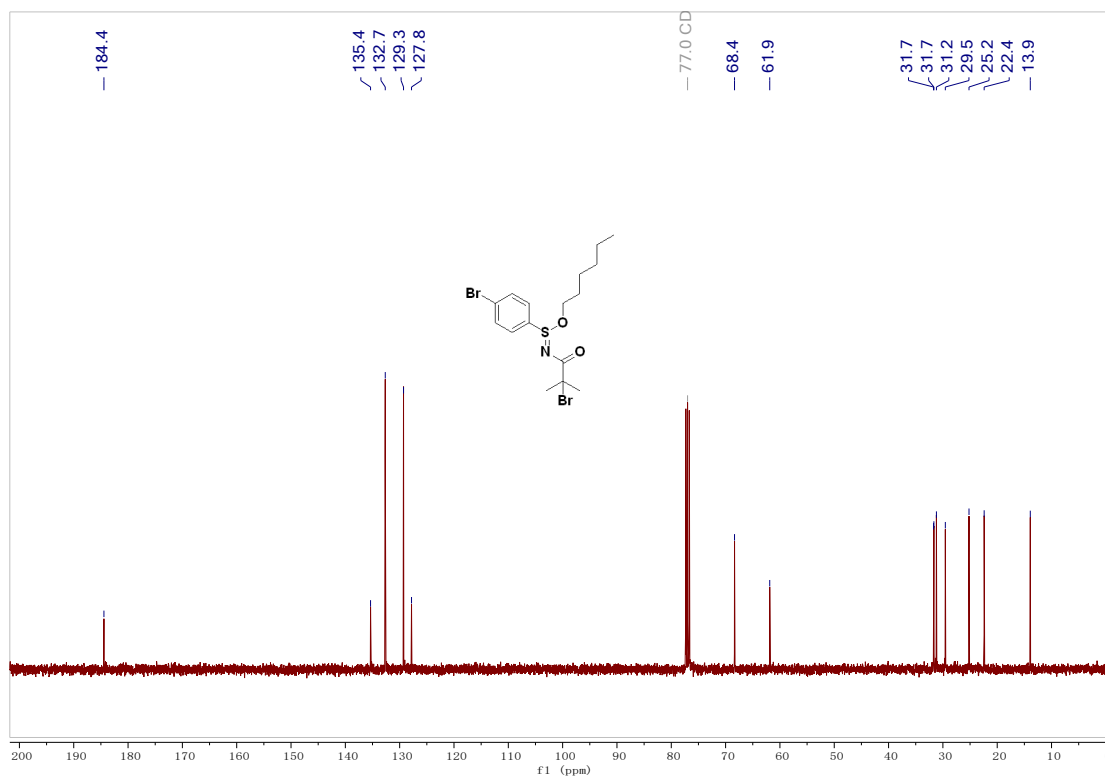

**<sup>1</sup>H NMR (400 MHz, Chloroform-*d*) of compound 4br**

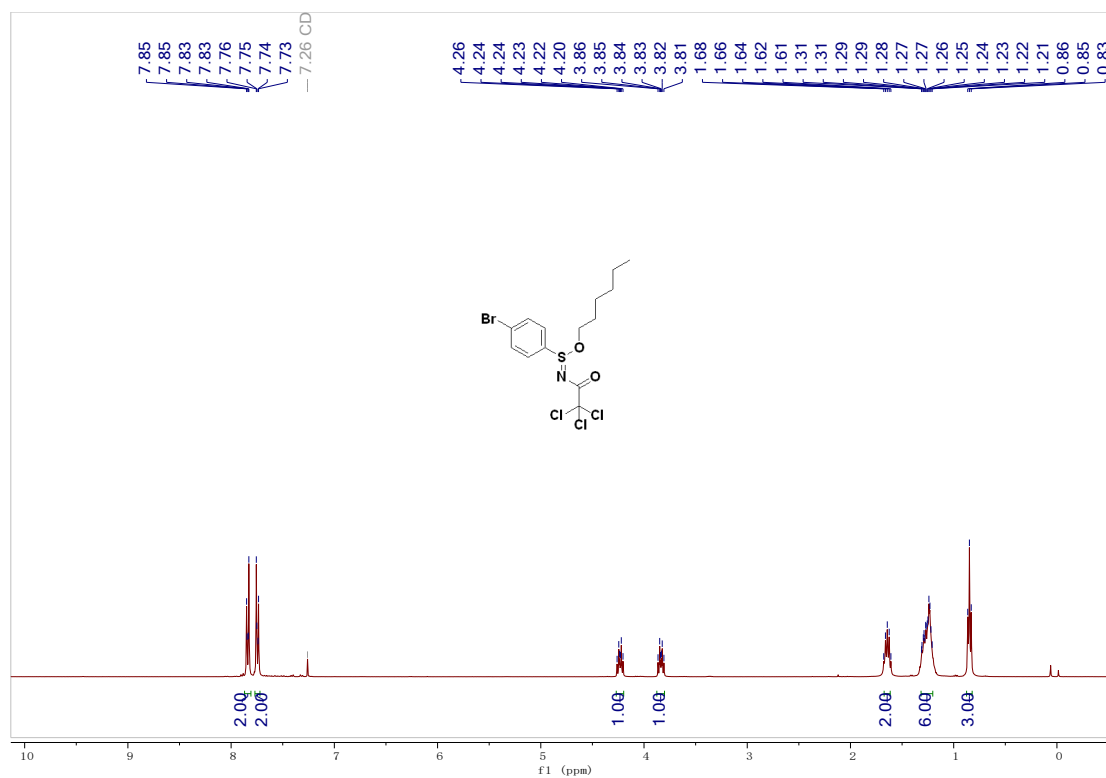

**<sup>13</sup>C NMR (100 MHz, Chloroform-*d*) of compound 4br**

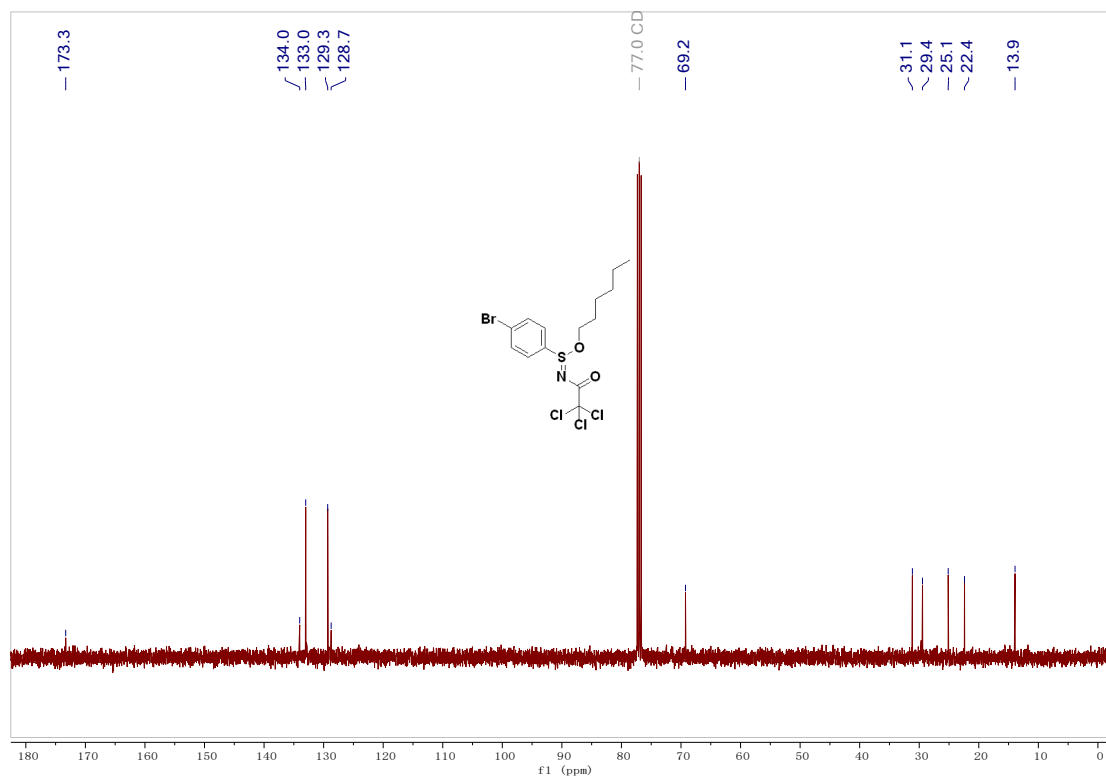

**<sup>1</sup>H NMR (400 MHz, Chloroform-*d*) of compound 4bs**

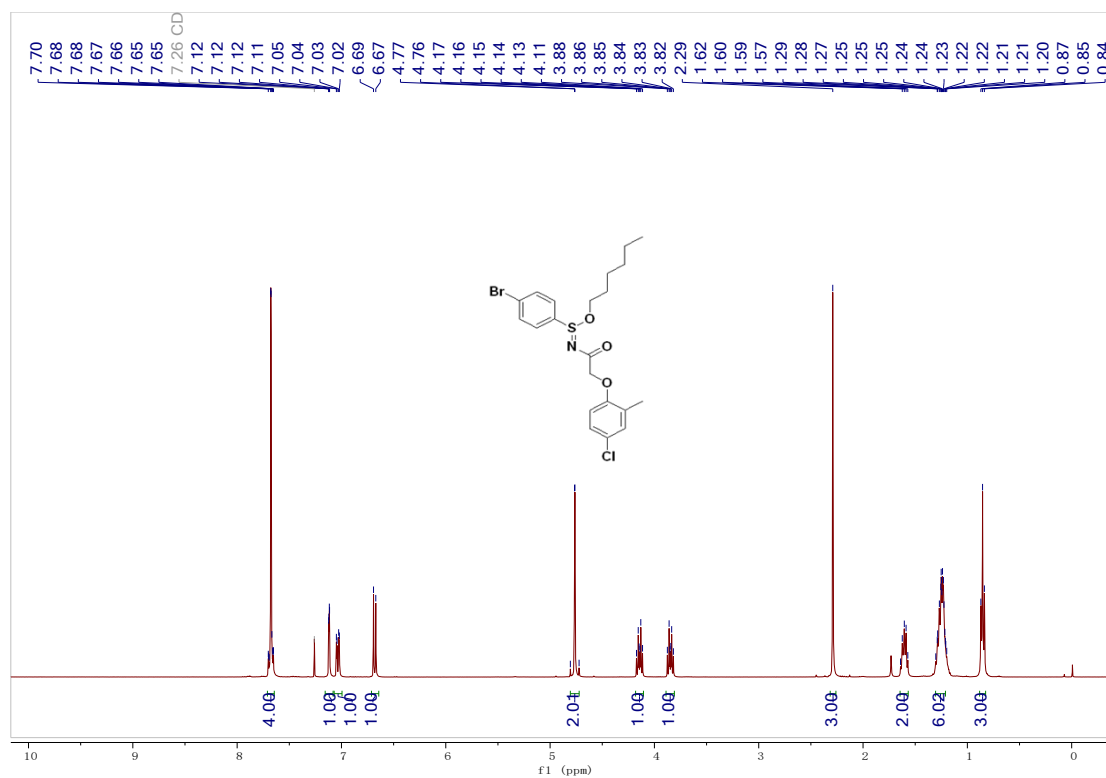

**<sup>13</sup>C NMR (100 MHz, Chloroform-*d*) of compound 4bs**

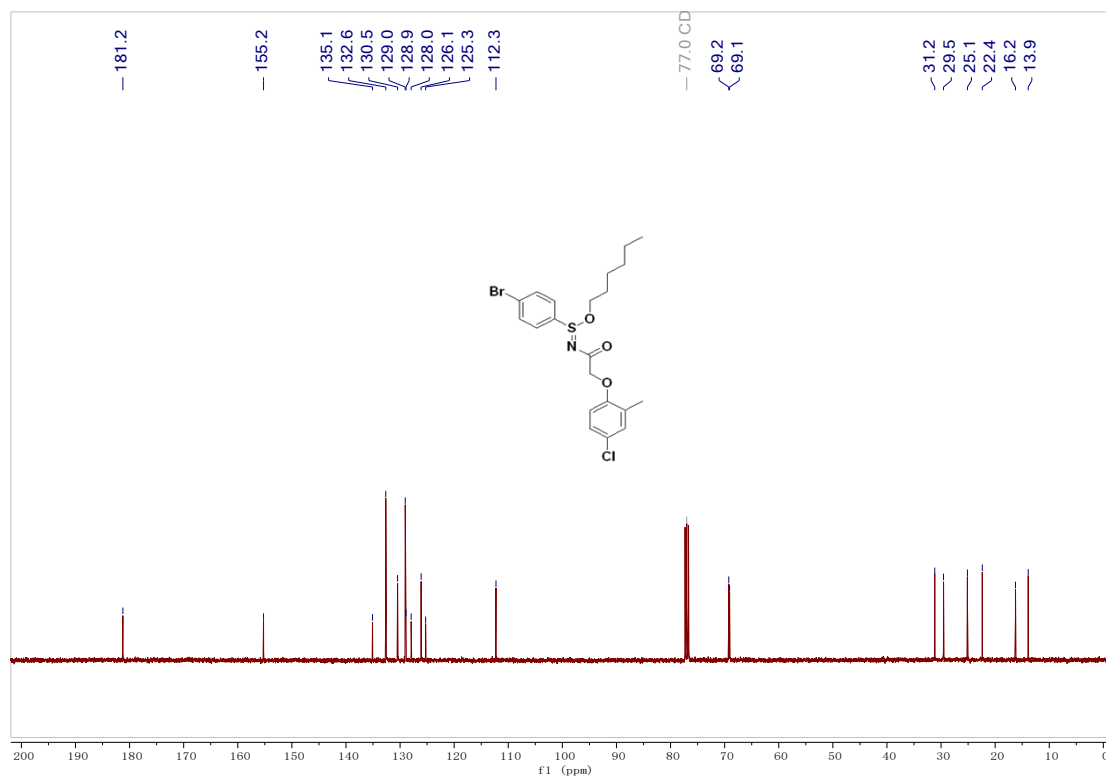

**<sup>1</sup>H NMR (400 MHz, Chloroform-*d*) of compound 4bt**

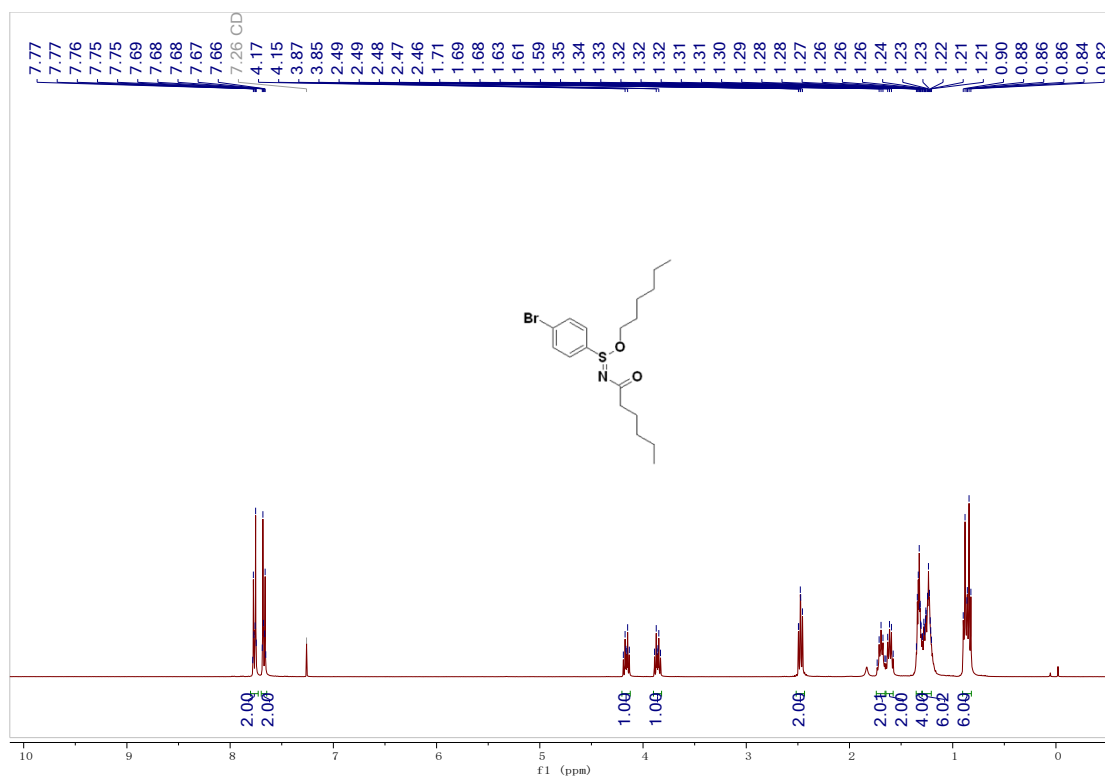

**<sup>13</sup>C NMR (100 MHz, Chloroform-*d*) of compound 4bt**

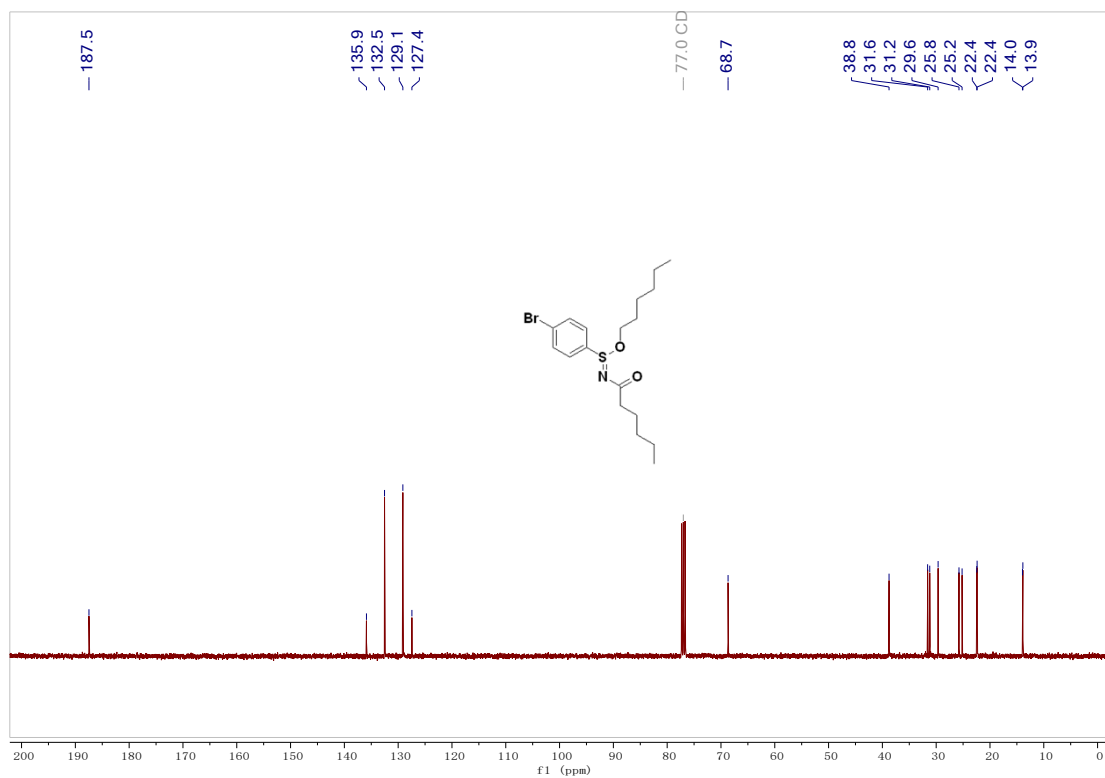

**<sup>1</sup>H NMR (400 MHz, Chloroform-*d*) of compound 4bu**

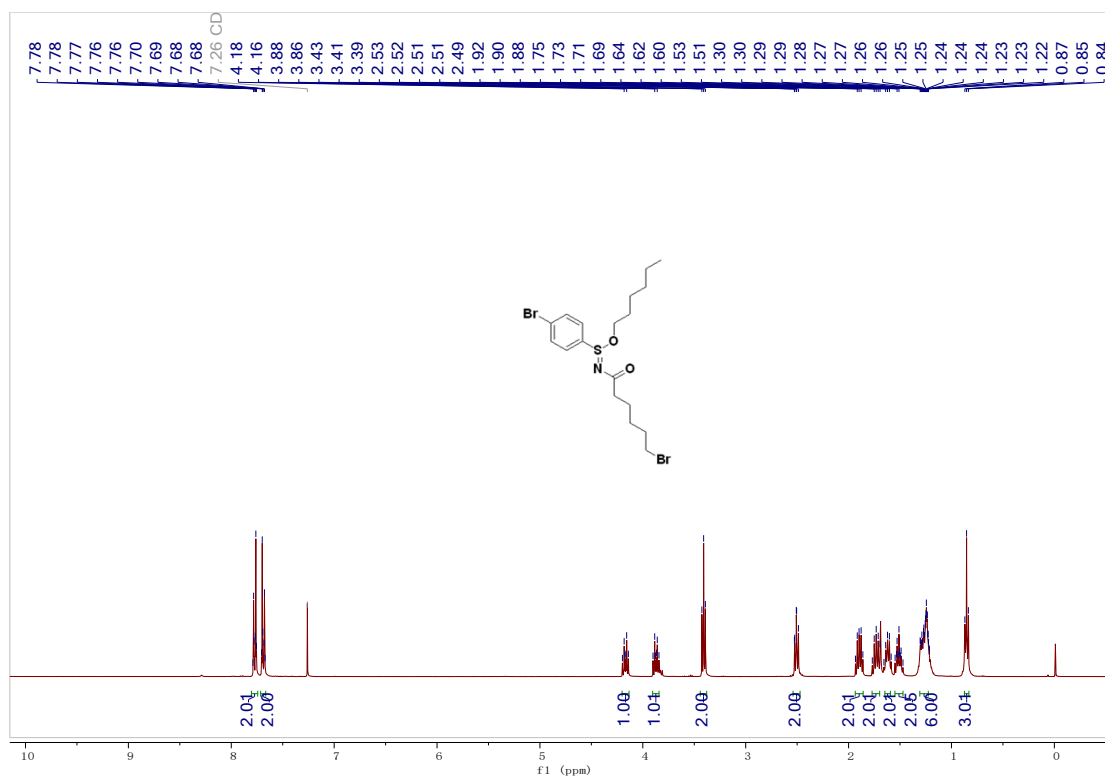

**<sup>13</sup>C NMR (100 MHz, Chloroform-*d*) of compound 4bu**

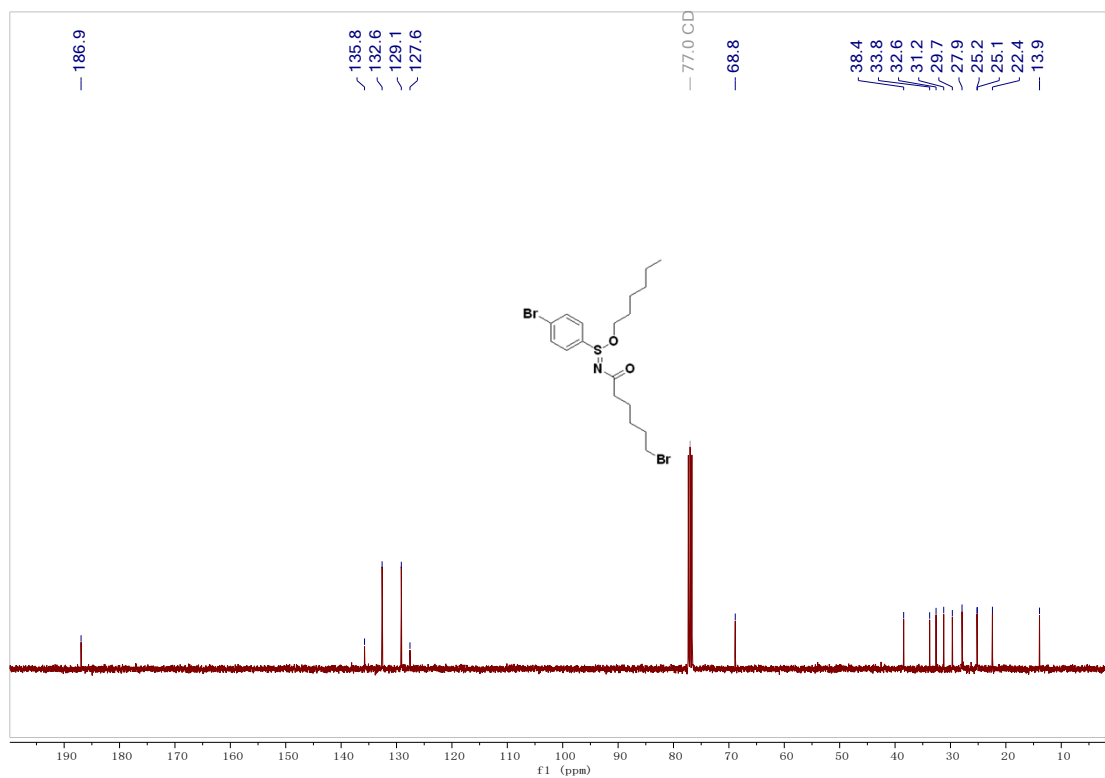

**$^1\text{H}$  NMR (400 MHz, Chloroform-*d*) of compound 4bv**

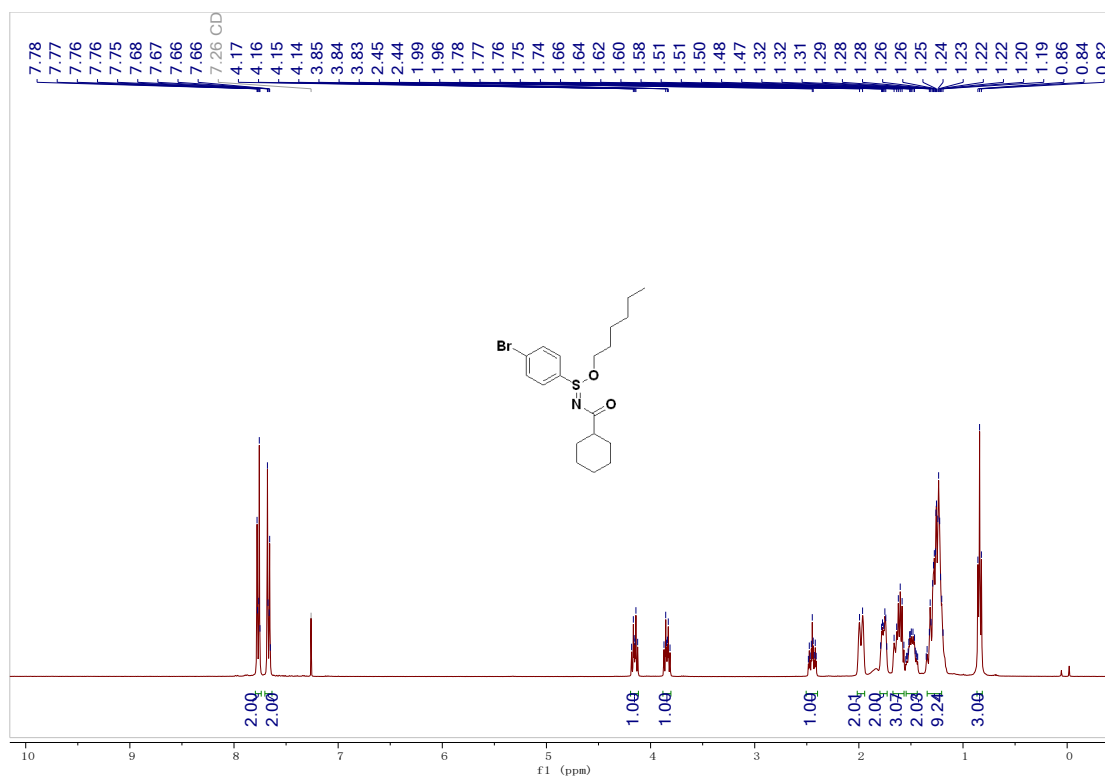

**$^{13}\text{C}$  NMR (100 MHz, Chloroform-*d*) of compound 4bv**

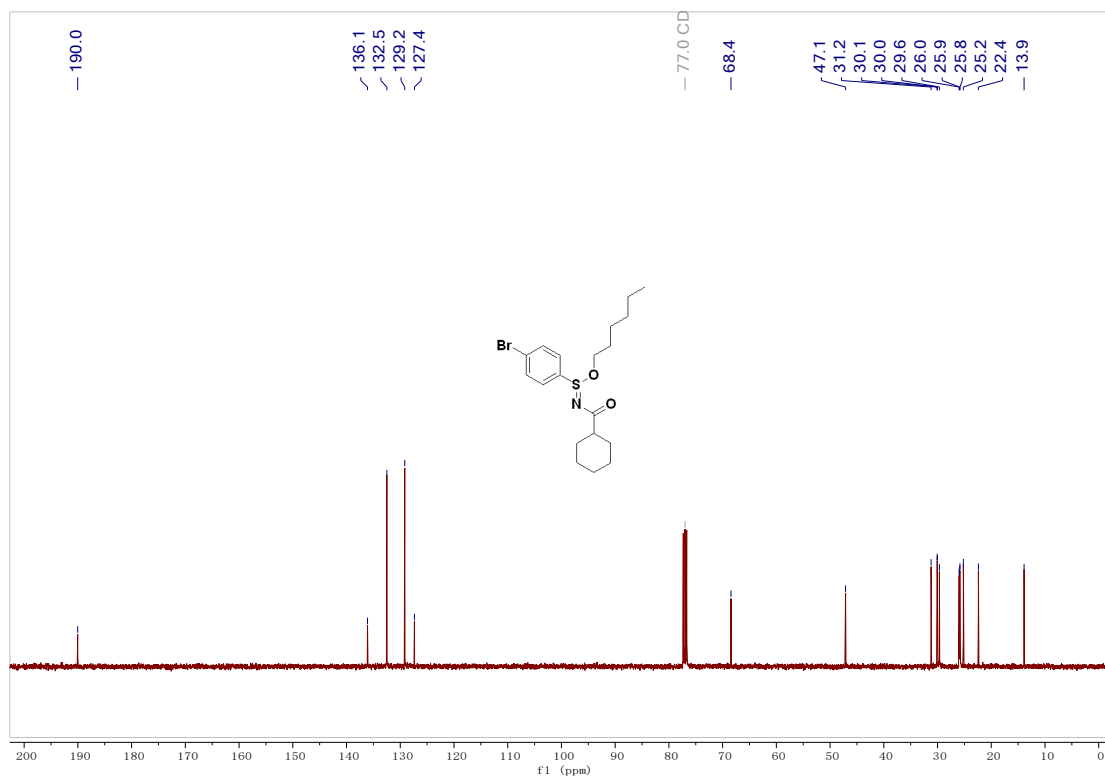

**<sup>1</sup>H NMR (400 MHz, Chloroform-*d*) of compound 4bw**

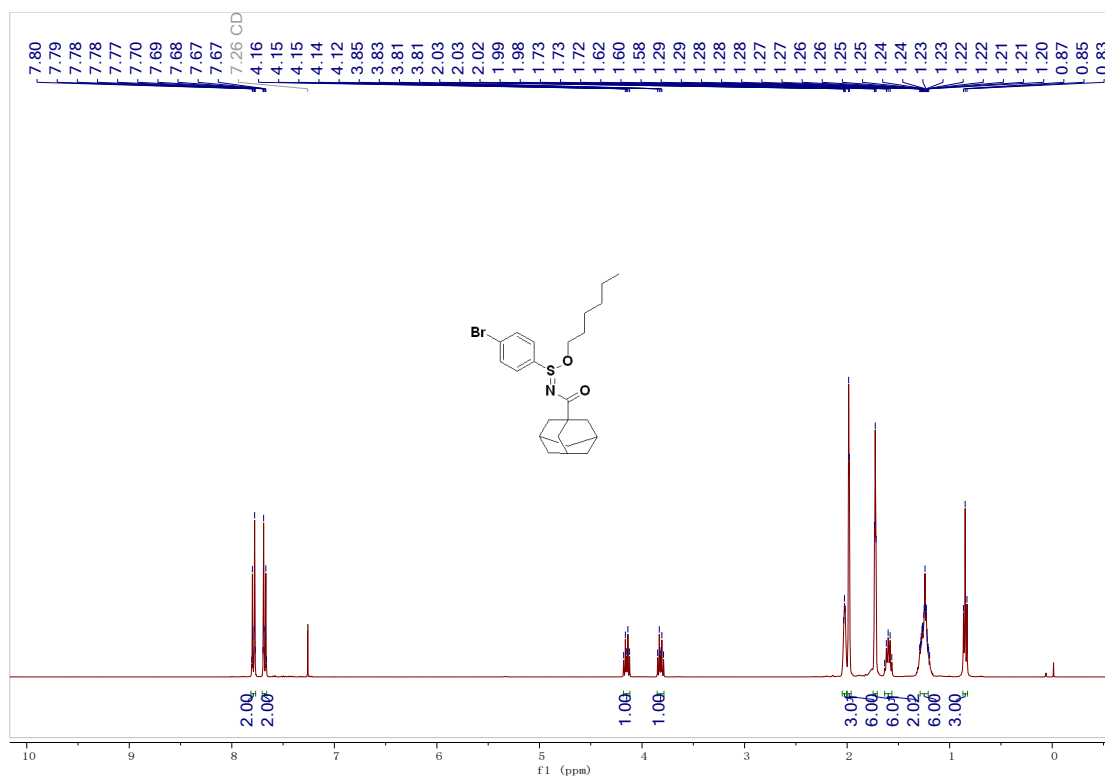

**<sup>13</sup>C NMR (100 MHz, Chloroform-*d*) of compound 4bw**

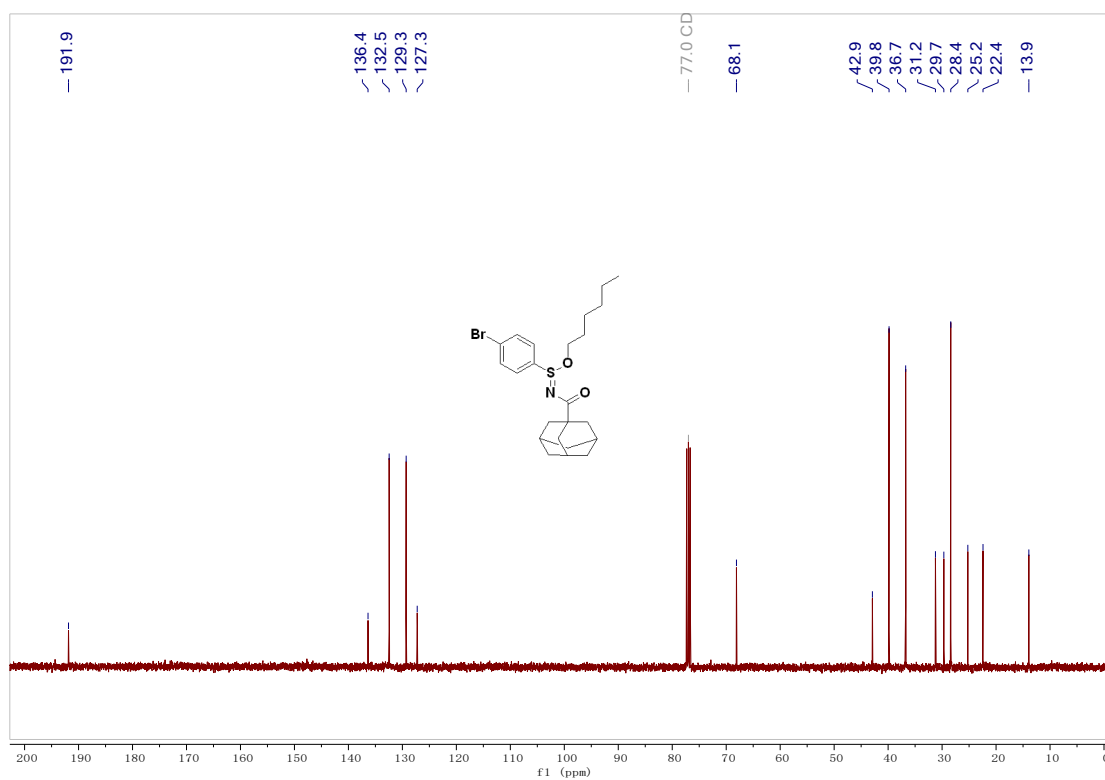



**<sup>1</sup>H NMR (400 MHz, Chloroform-*d*) of compound 4bx**

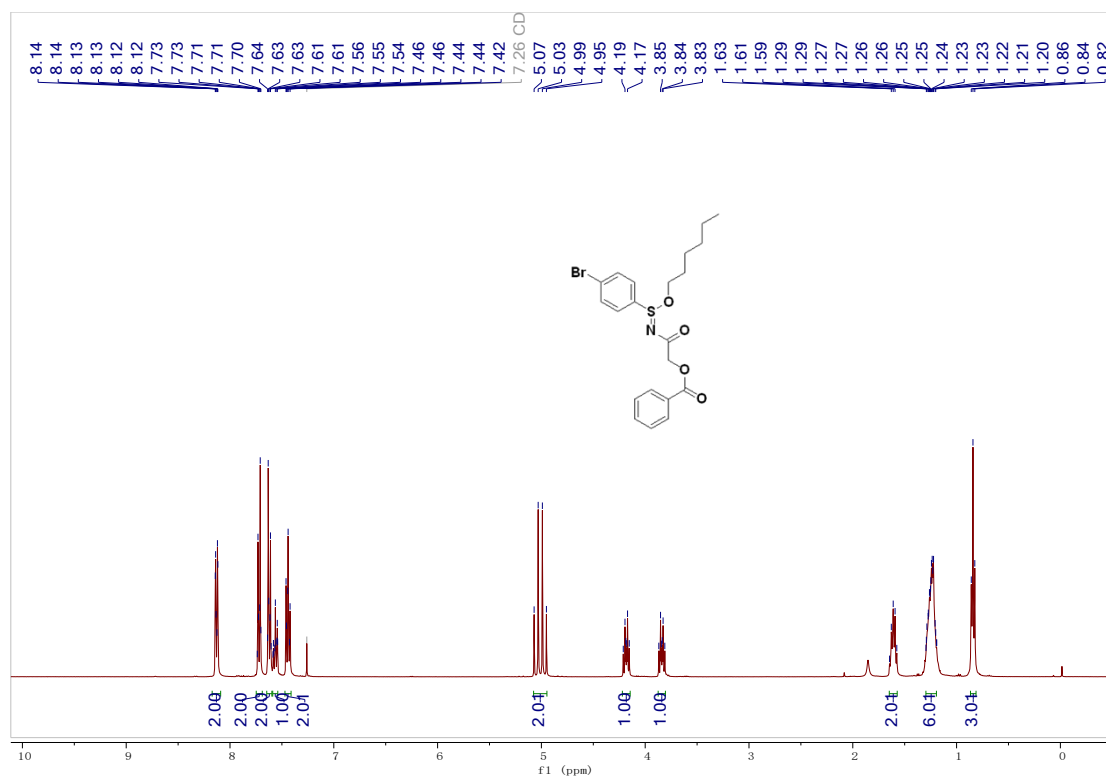

**<sup>13</sup>C NMR (100 MHz, Chloroform-*d*) of compound 4bx**

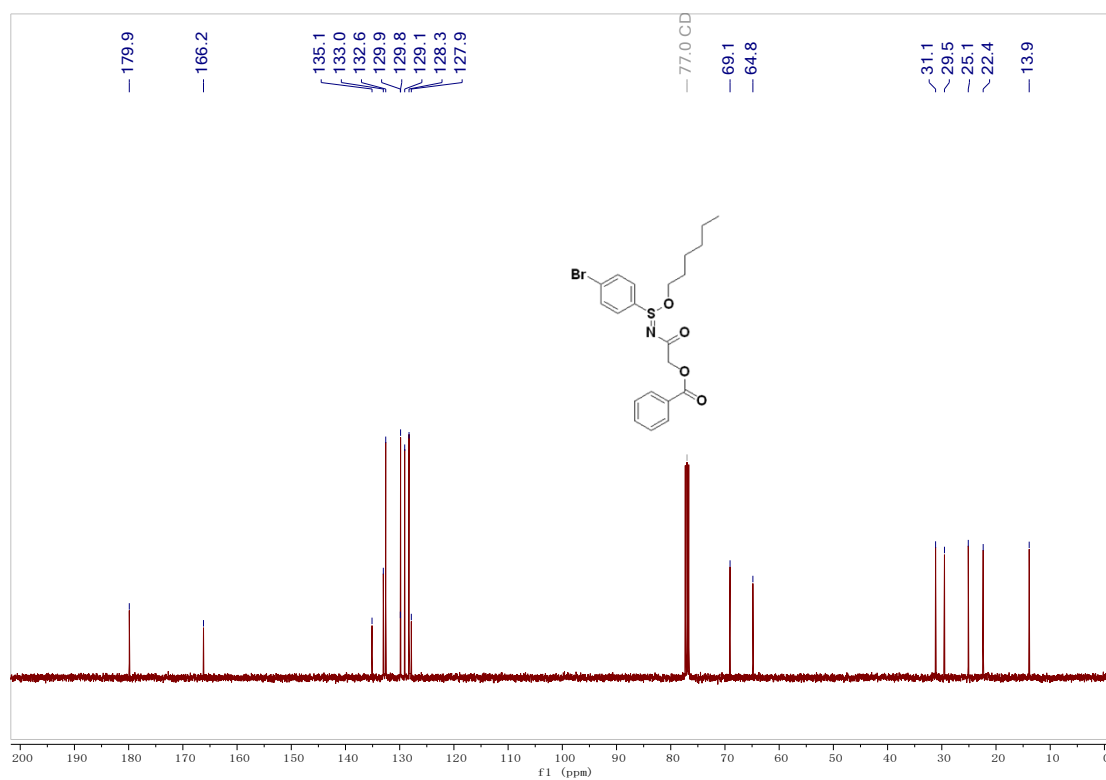

**<sup>1</sup>H NMR (400 MHz, Chloroform-*d*) of compound 4by**

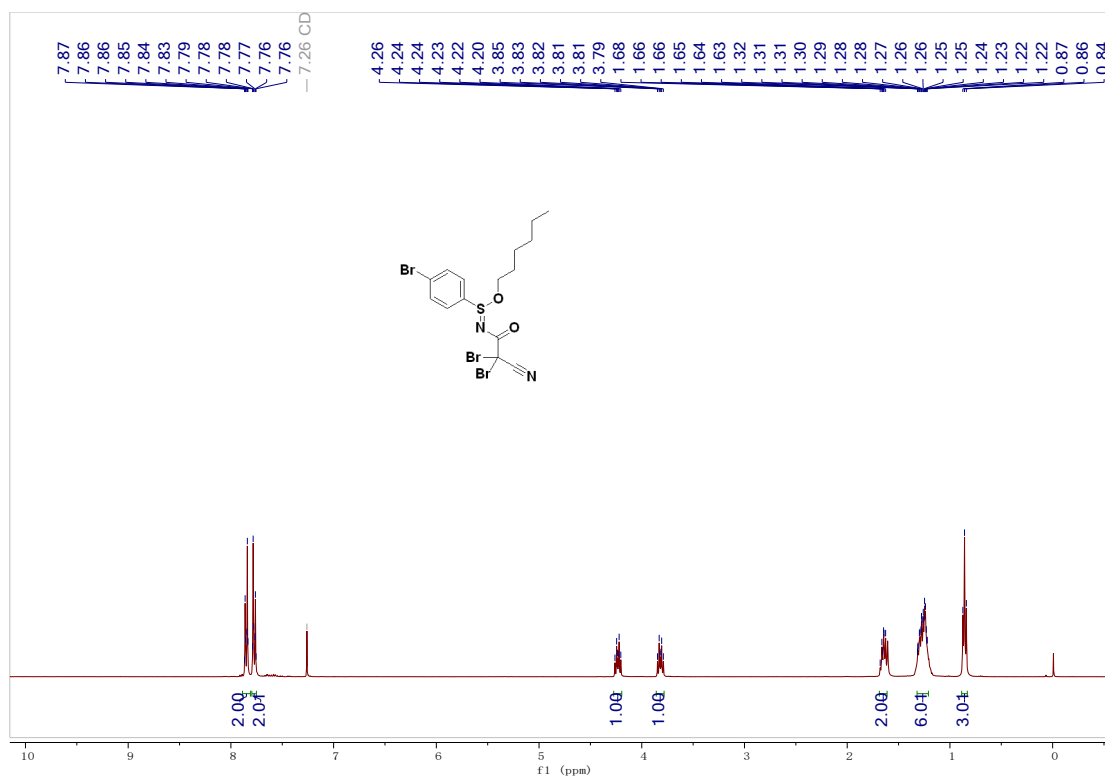

**<sup>13</sup>C NMR (100 MHz, Chloroform-*d*) of compound 4by**

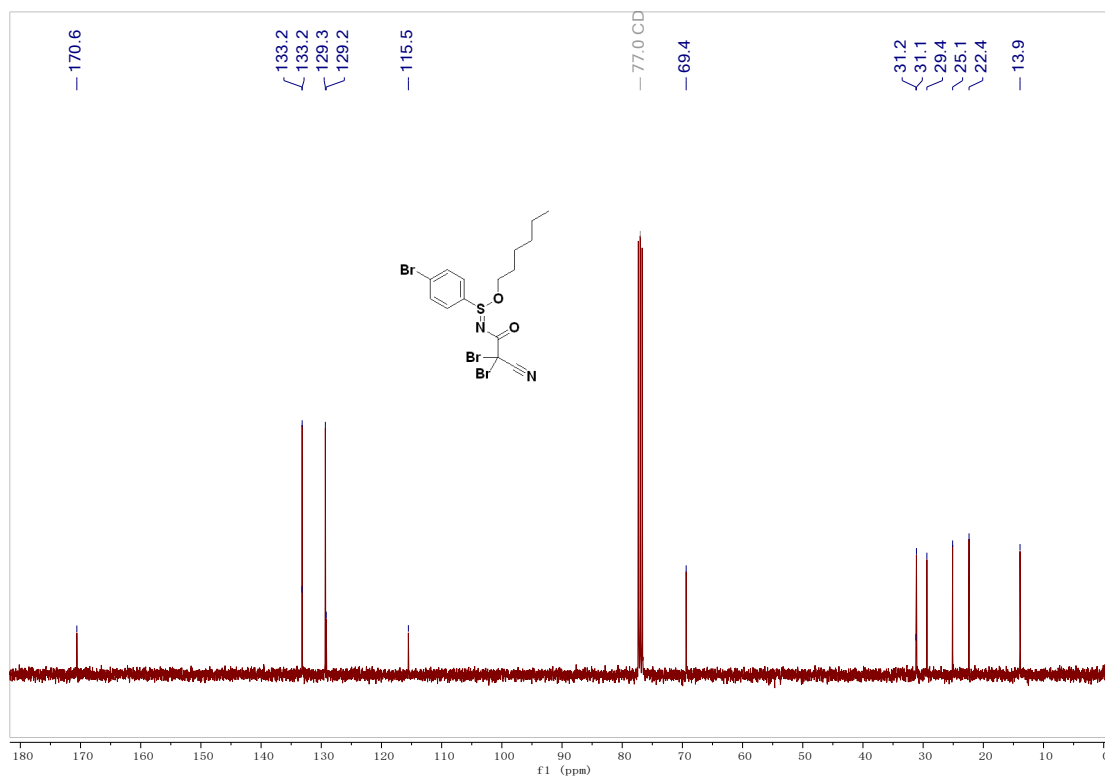

**<sup>1</sup>H NMR (400 MHz, Chloroform-*d*) of compound 4bz**

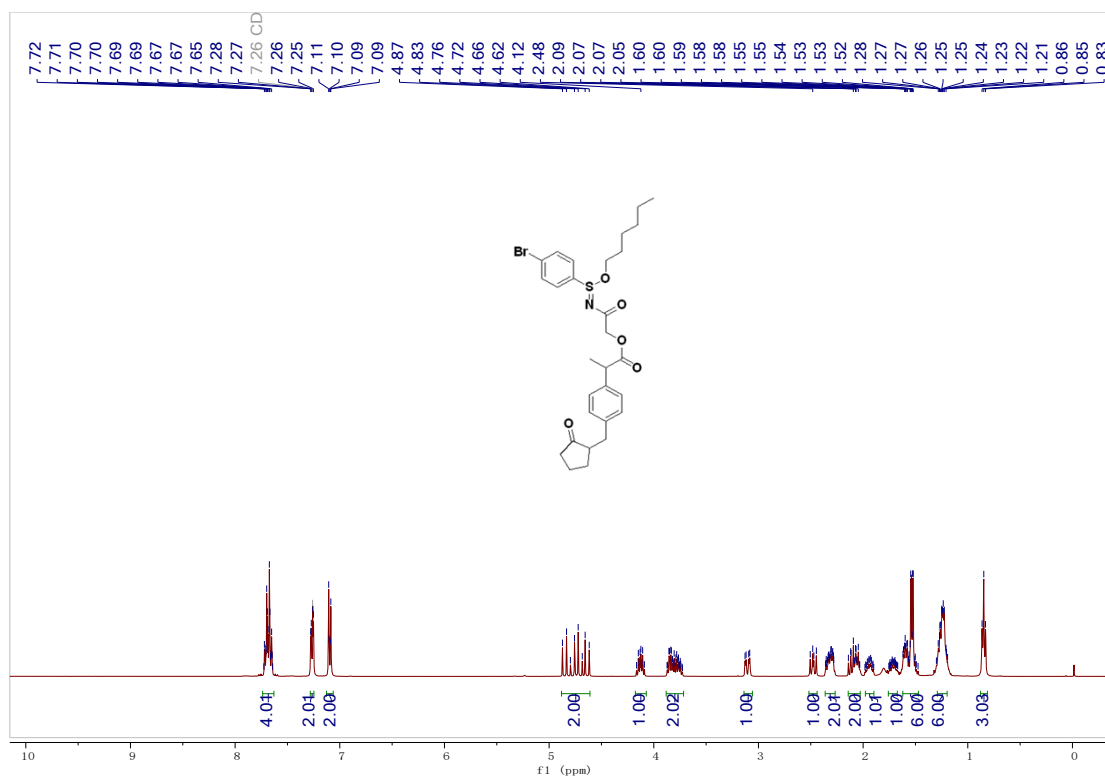

**<sup>13</sup>C NMR (100 MHz, Chloroform-*d*) of compound 4bz**

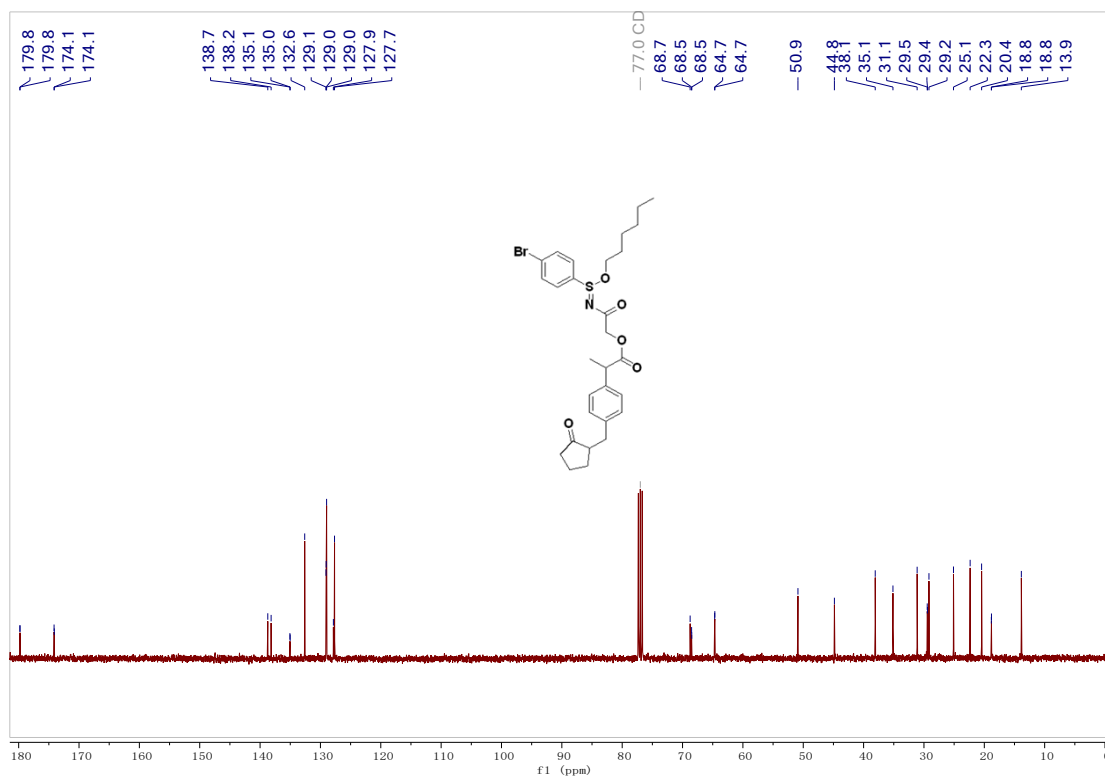

**<sup>1</sup>H NMR (400 MHz, Chloroform-*d*) of compound 4ca**

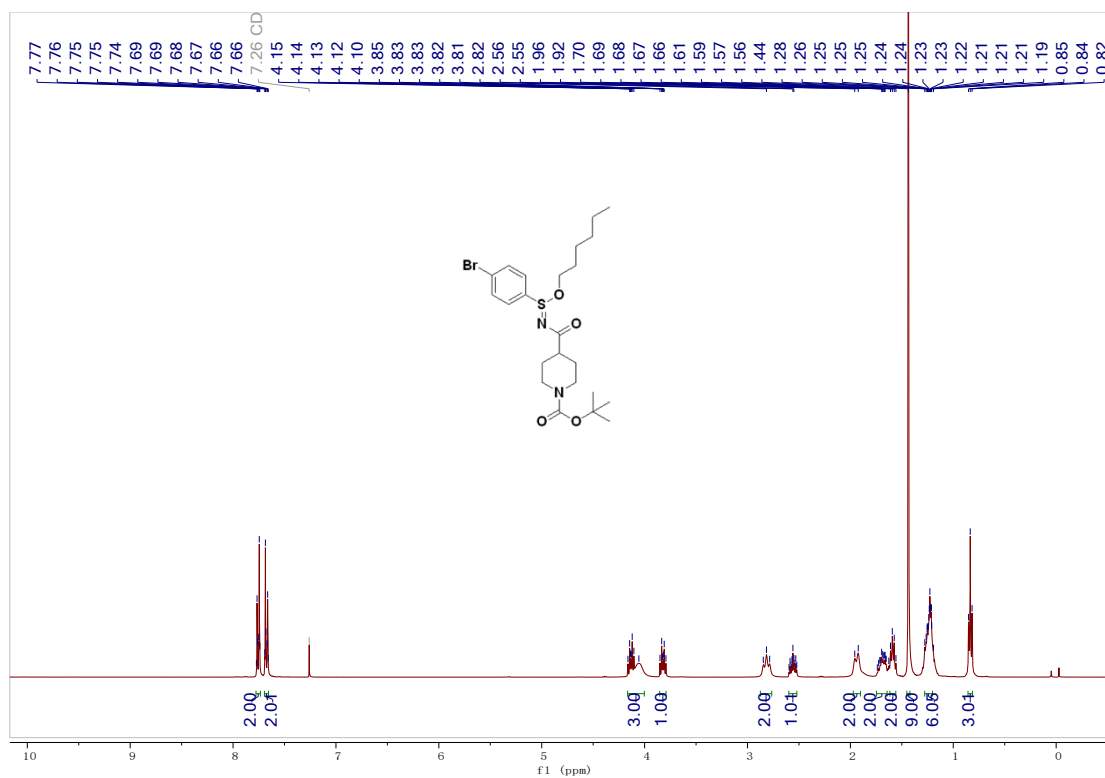

**<sup>13</sup>C NMR (100 MHz, Chloroform-*d*) of compound 4ca**

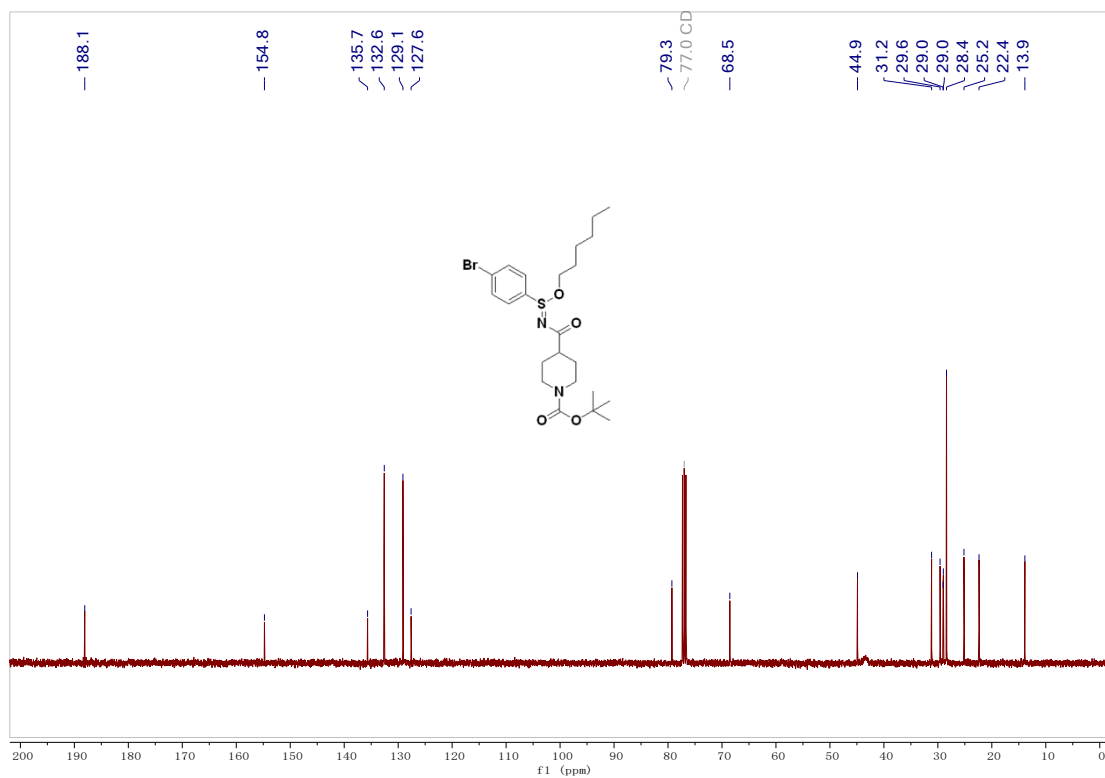

**<sup>1</sup>H NMR (400 MHz, Chloroform-*d*) of compound 4b**

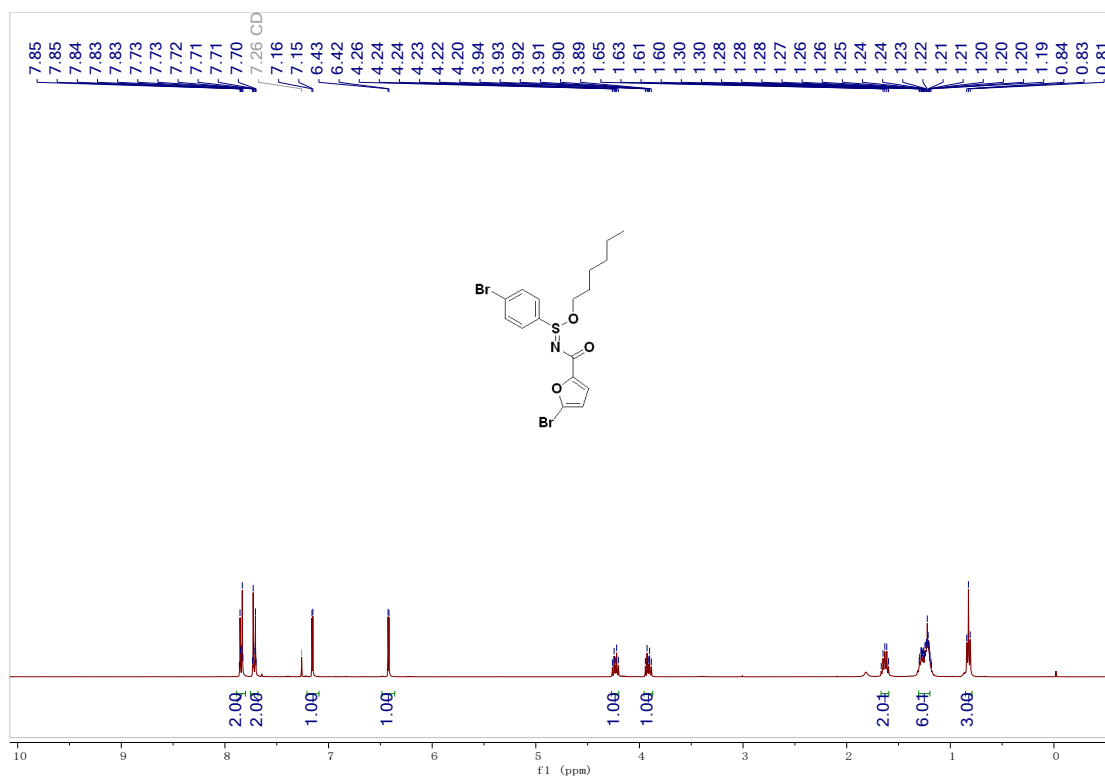

**<sup>13</sup>C NMR (100 MHz, Chloroform-*d*) of compound 4b**

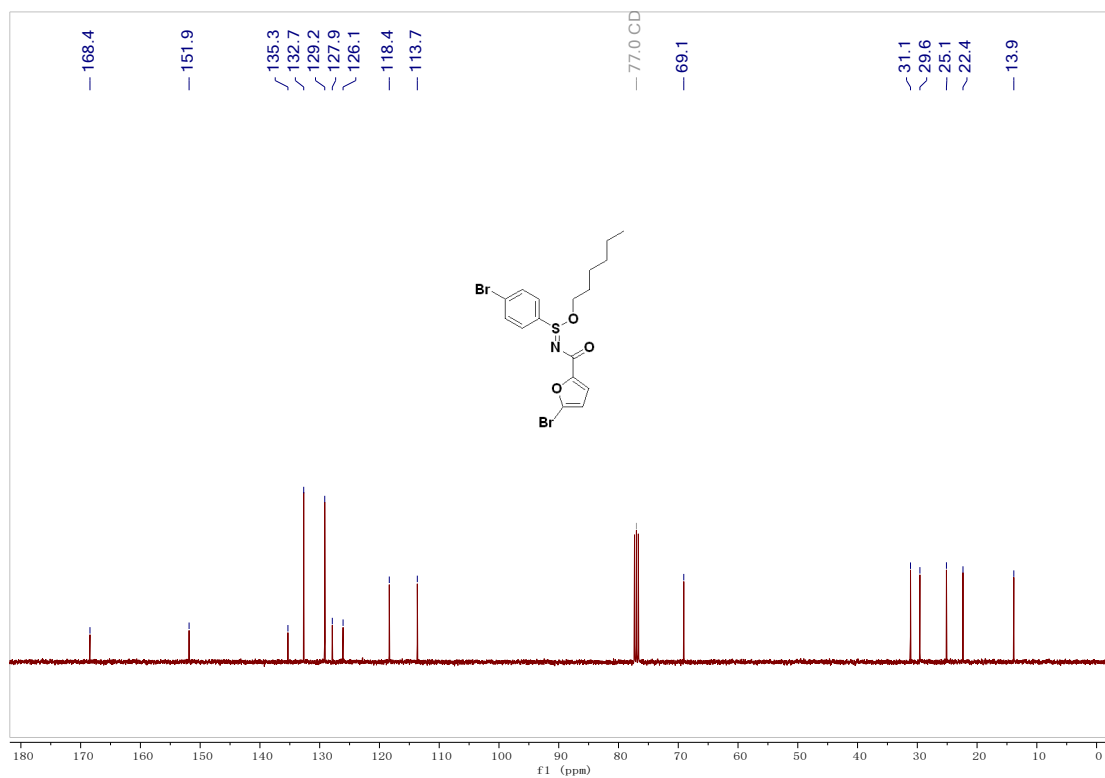

**<sup>1</sup>H NMR (400 MHz, Chloroform-*d*) of compound 4cc**

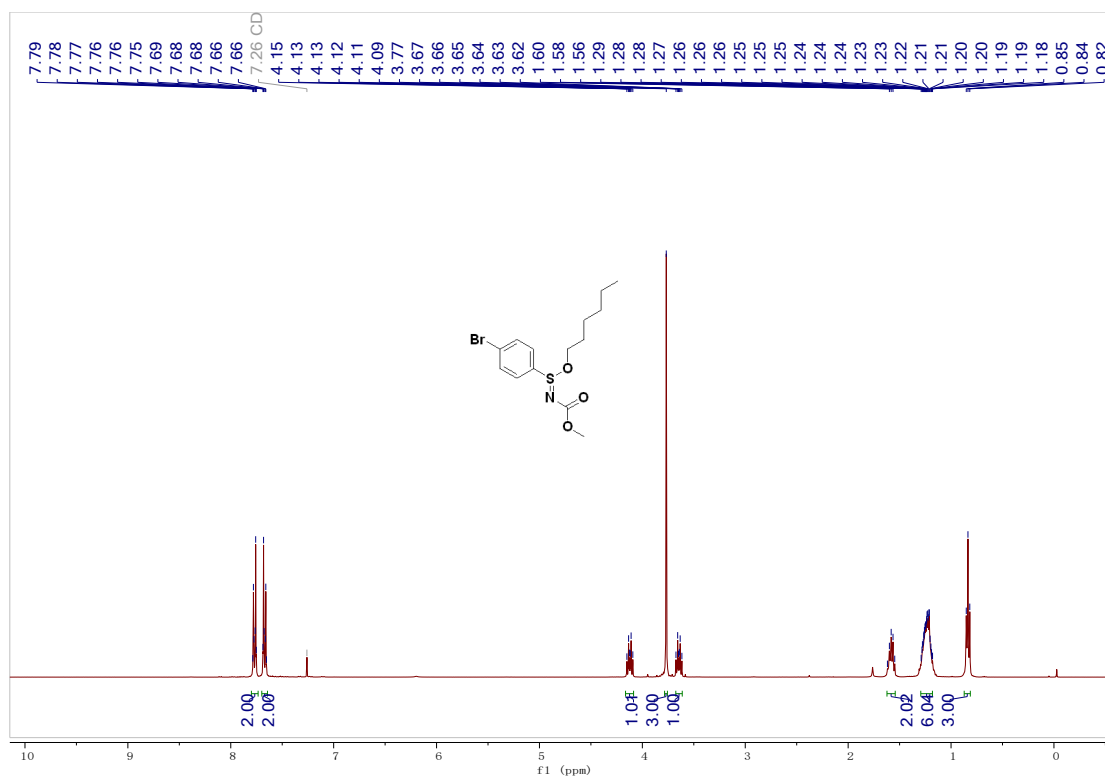

**<sup>13</sup>C NMR (100 MHz, Chloroform-*d*) of compound 4cc**

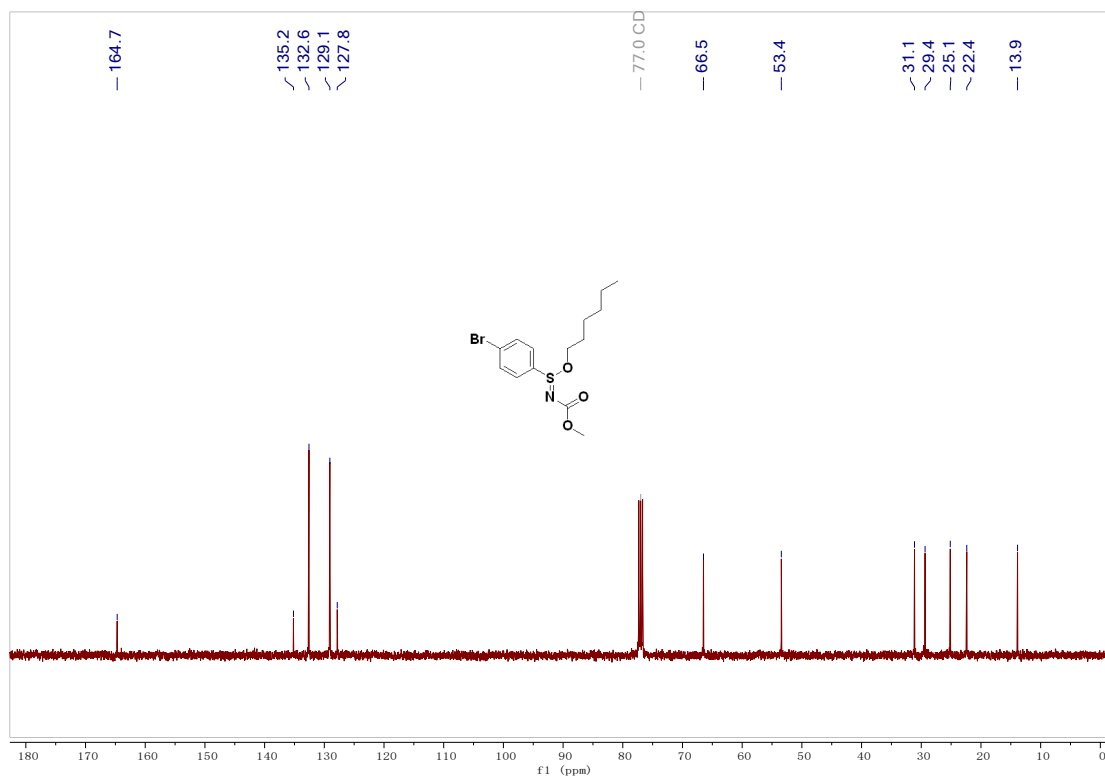

**<sup>1</sup>H NMR (400 MHz, Chloroform-*d*) of compound 4cd**

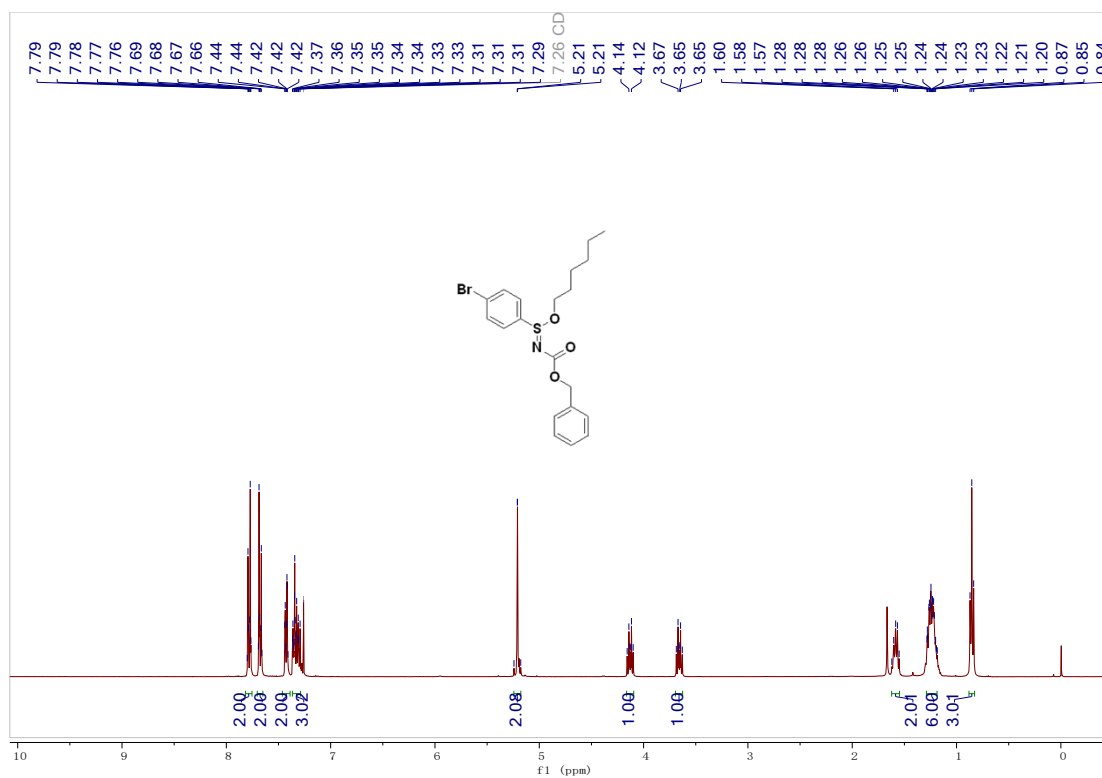

**<sup>13</sup>C NMR (100 MHz, Chloroform-*d*) of compound 4cd**

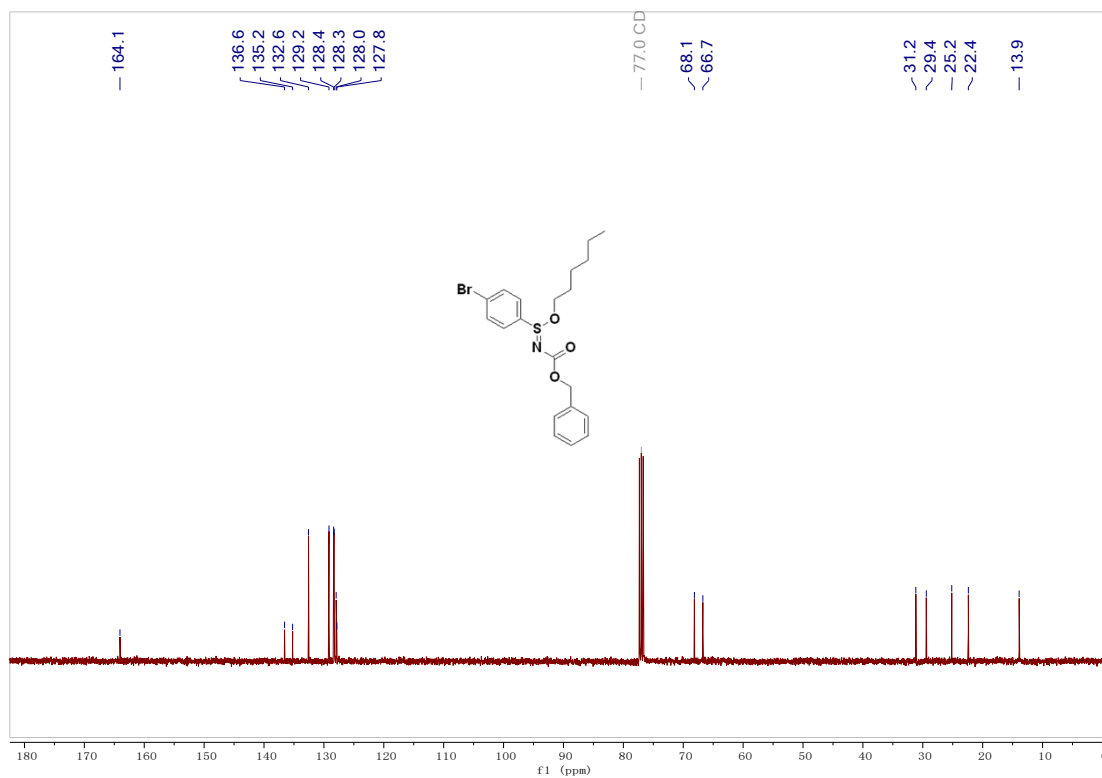

**<sup>1</sup>H NMR (400 MHz, Chloroform-*d*) of compound 5a**

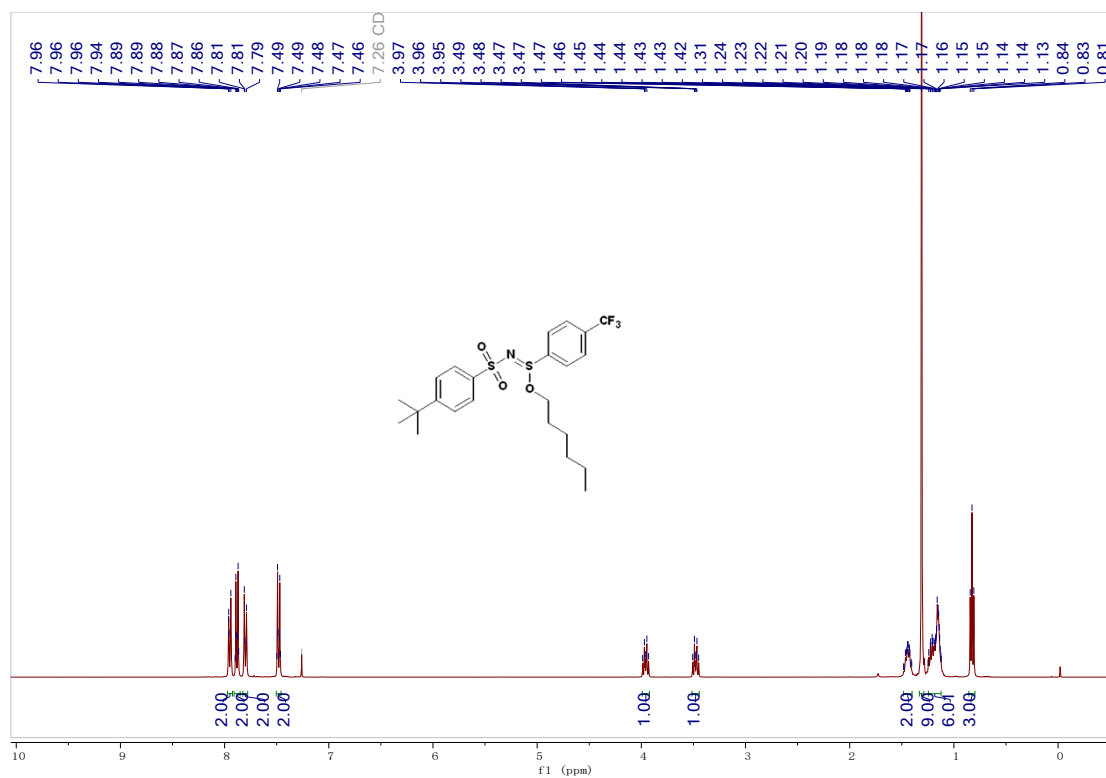

**<sup>13</sup>C NMR (100 MHz, Chloroform-*d*) of compound 5a**

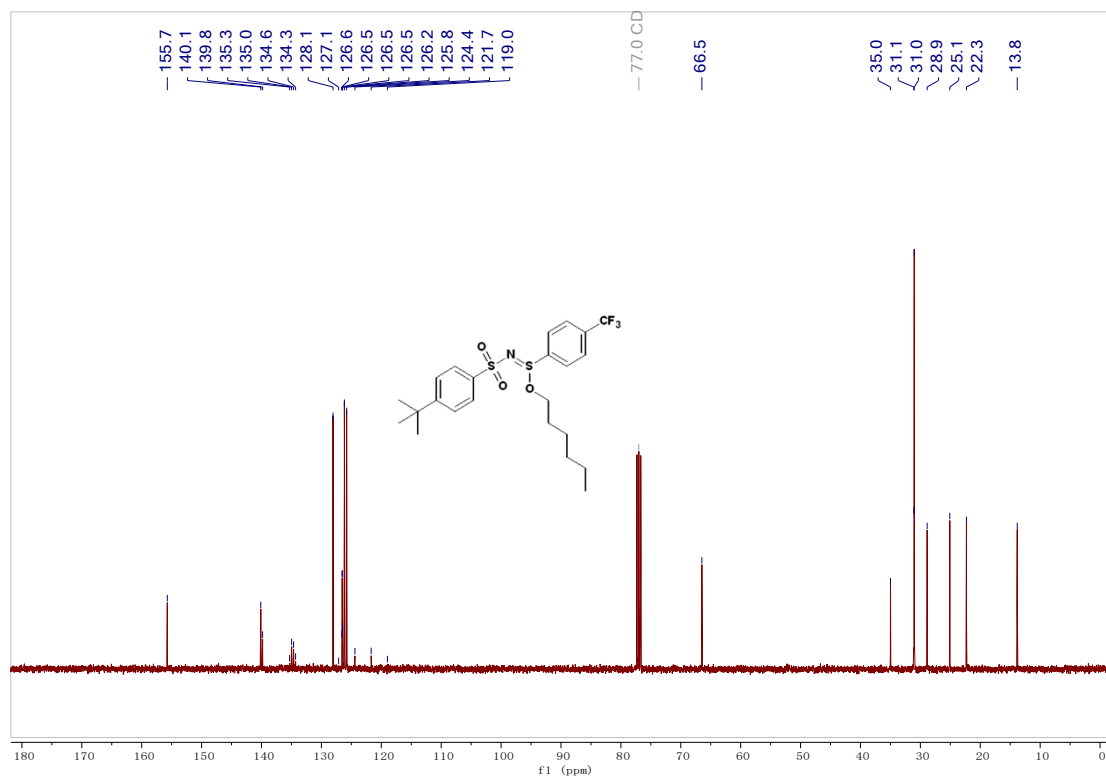



**<sup>19</sup>F NMR (376 MHz, Chloroform-*d*) of compound 5a**

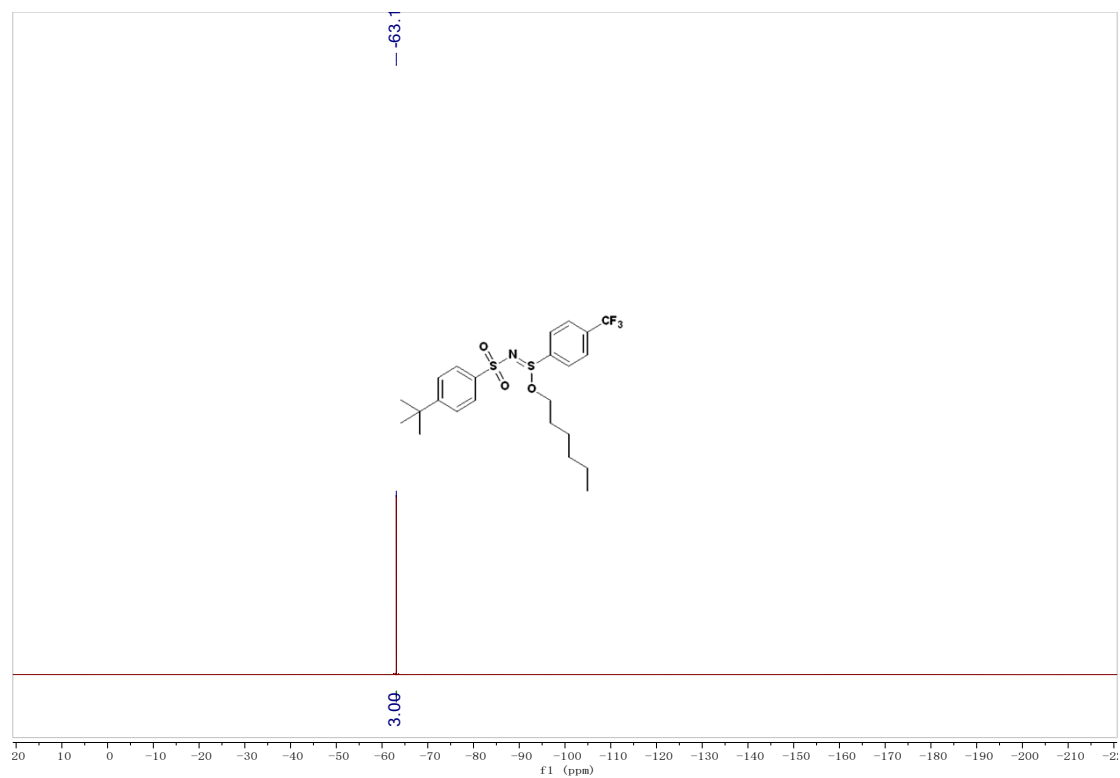

**<sup>1</sup>H NMR (400 MHz, Chloroform-*d*) of compound 5b**

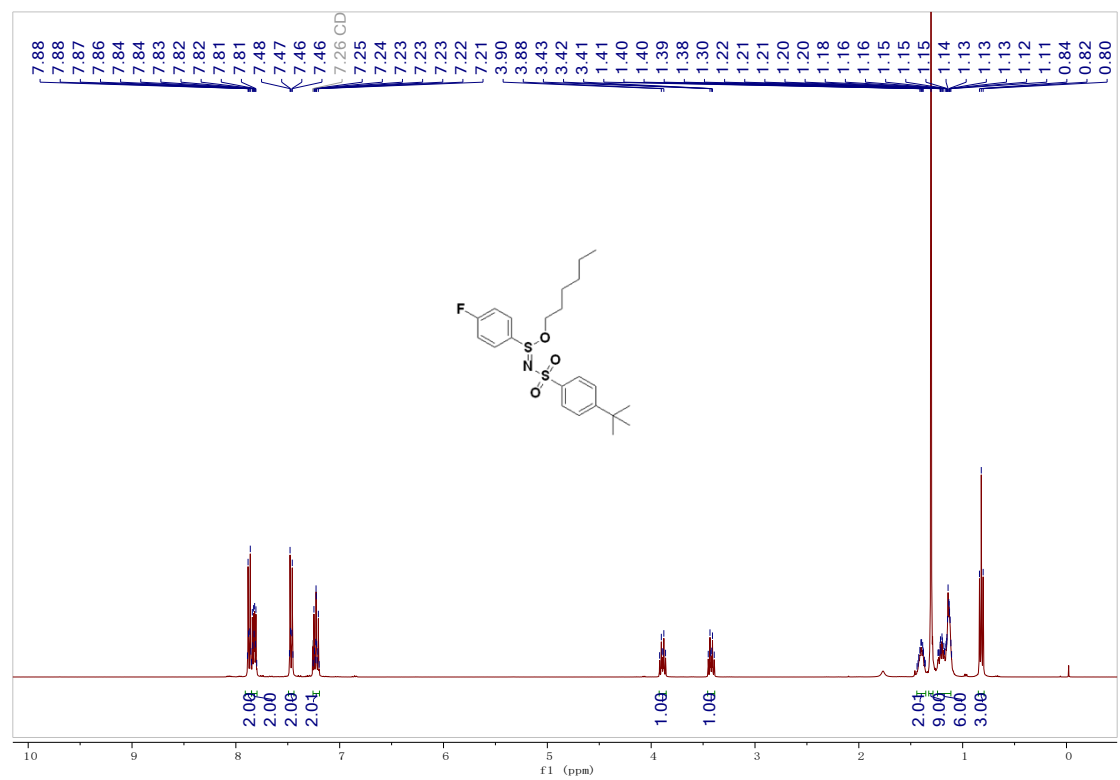

**<sup>13</sup>C NMR (100 MHz, Chloroform-*d*) of compound 5b**

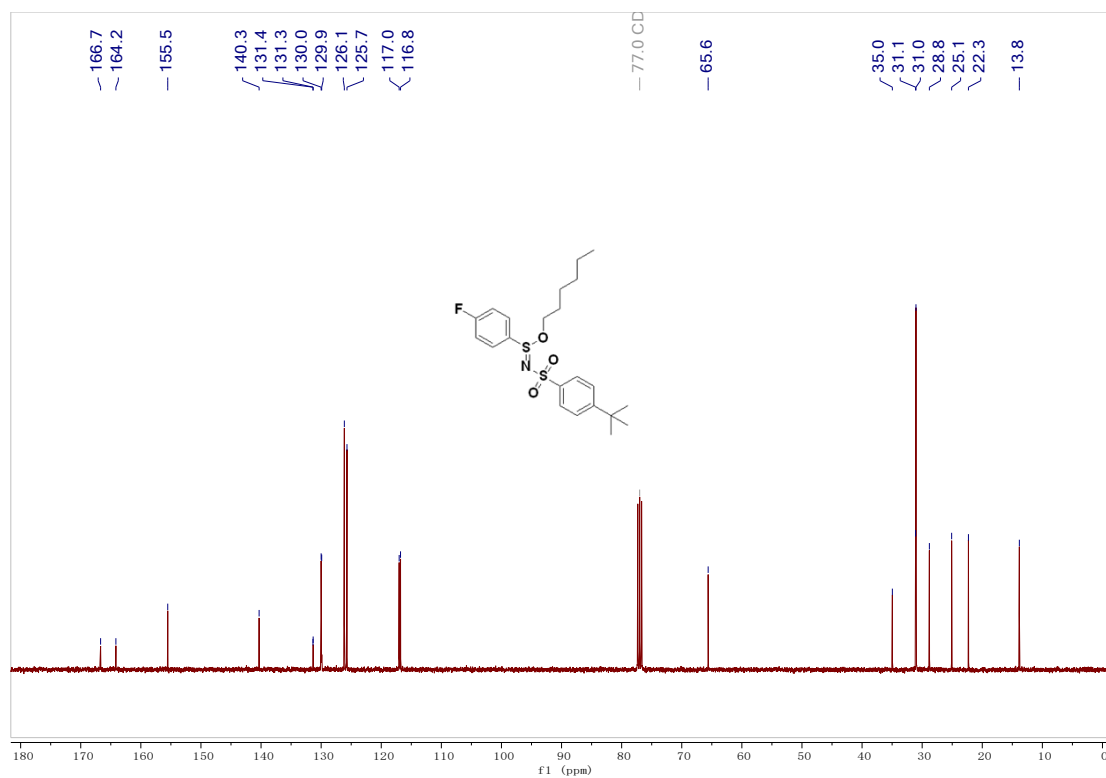

**<sup>19</sup>F NMR (376 MHz, Chloroform-*d*) of compound 5b**

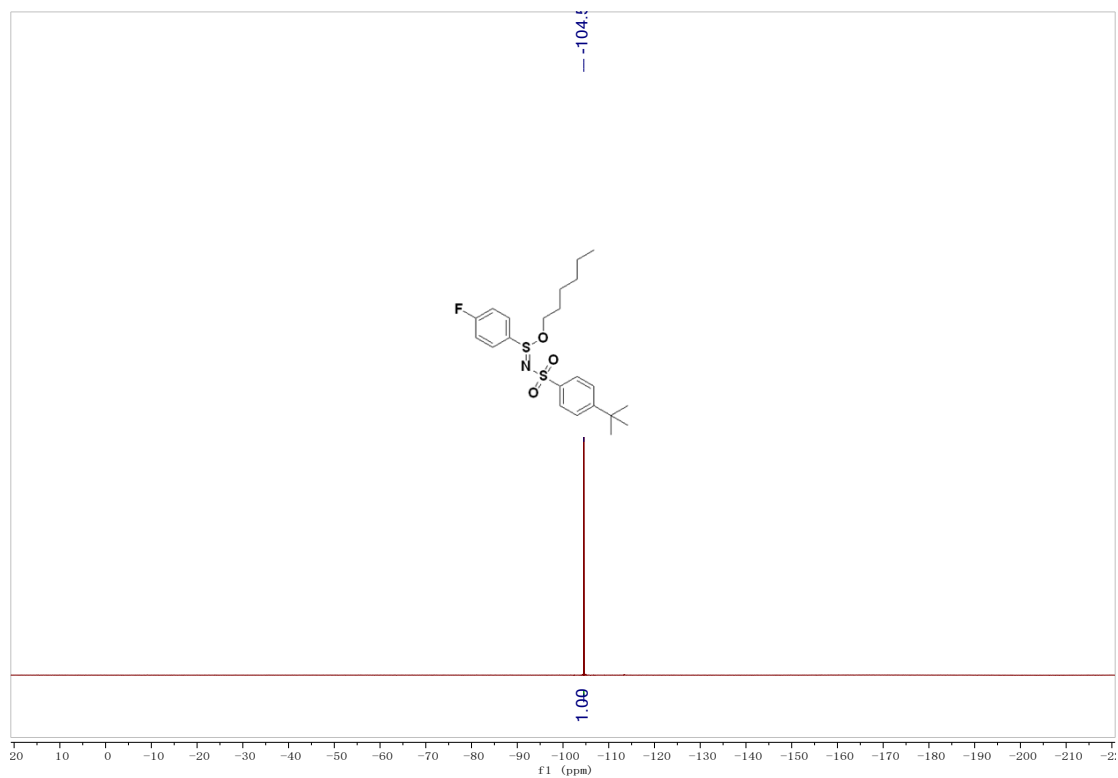

**<sup>1</sup>H NMR (400 MHz, Chloroform-*d*) of compound 5c**

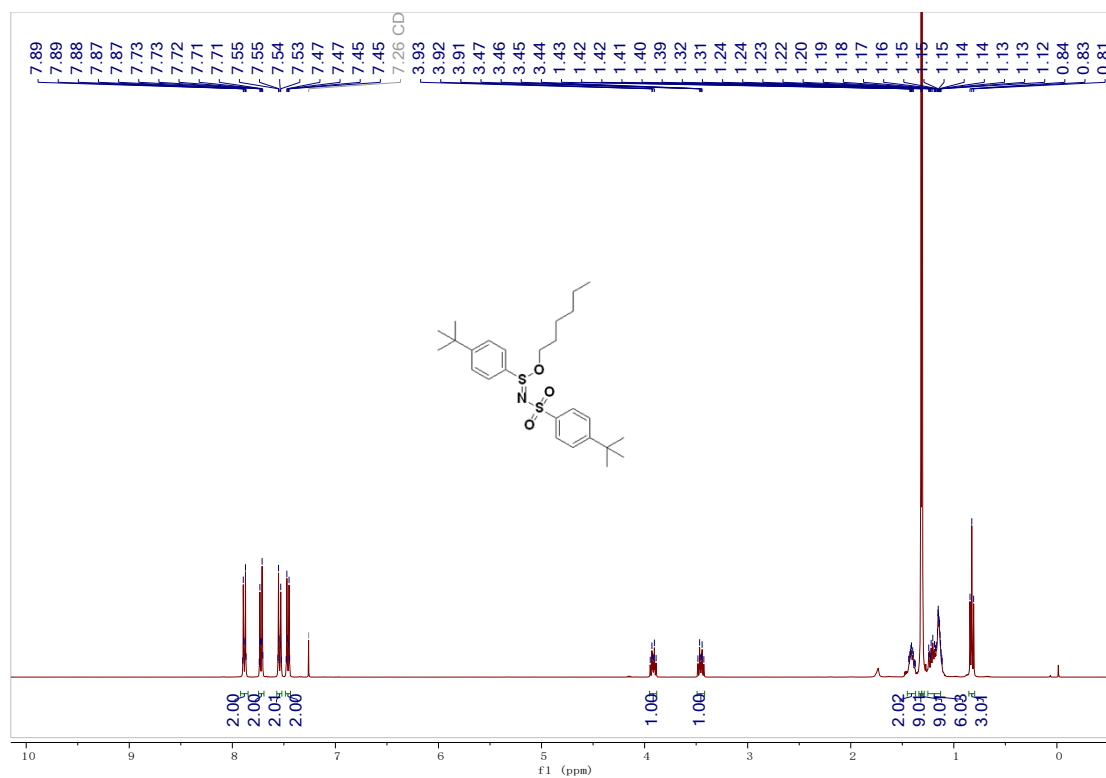

**<sup>13</sup>C NMR (100 MHz, Chloroform-*d*) of compound 5c**

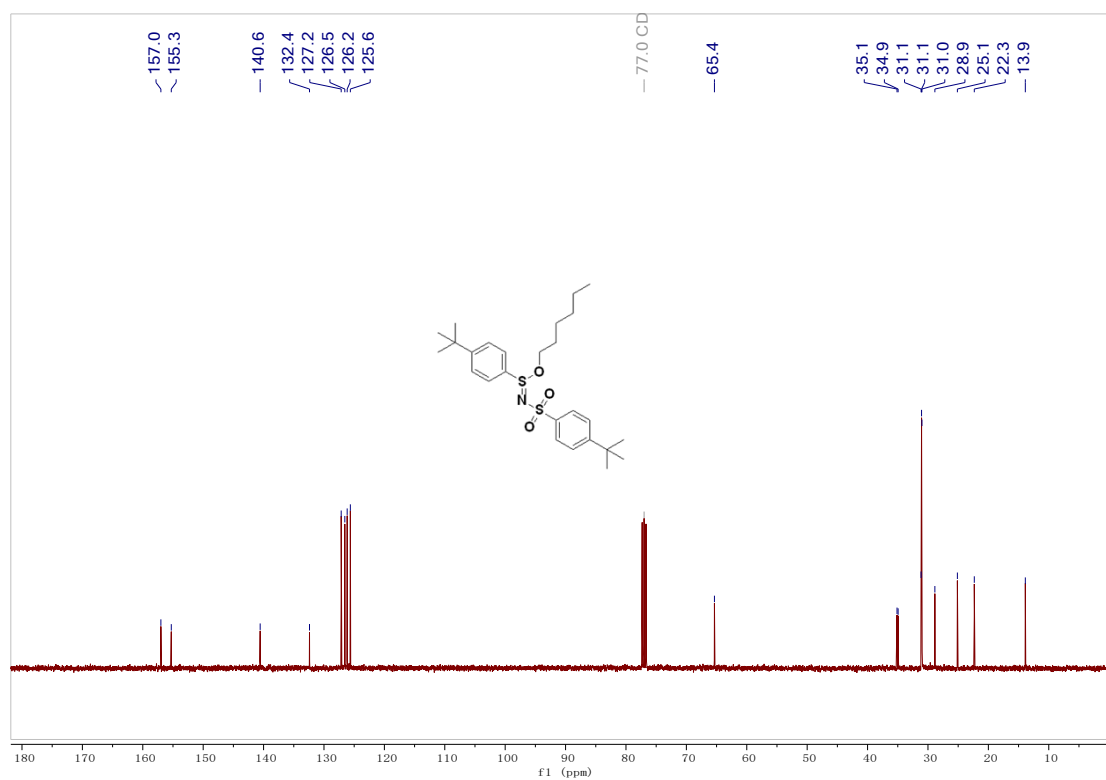

**<sup>1</sup>H NMR (400 MHz, Chloroform-*d*) of compound 5d**

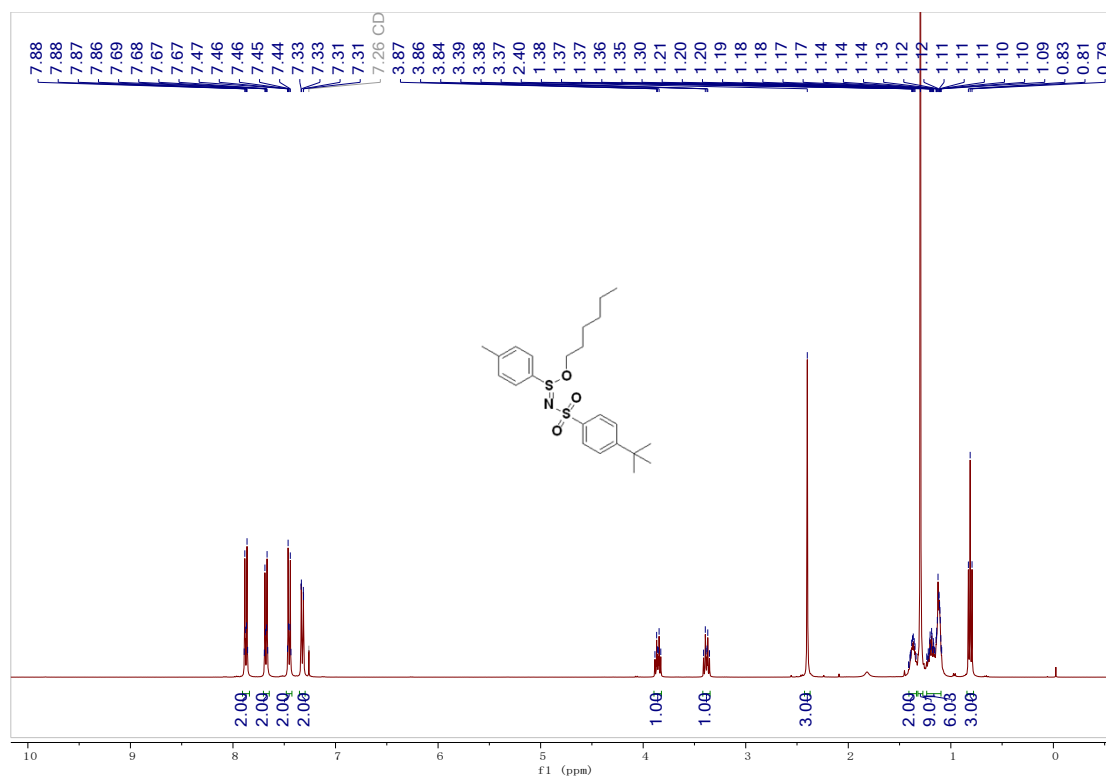

**<sup>13</sup>C NMR (100 MHz, Chloroform-*d*) of compound 5d**

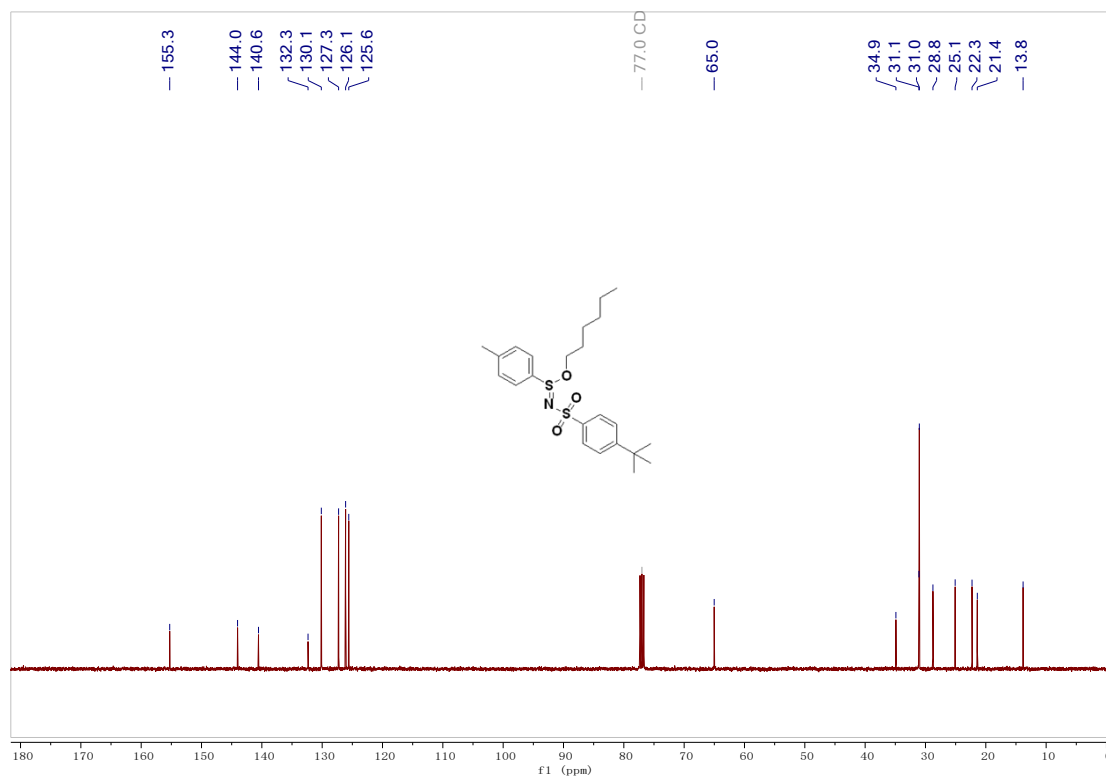

<sup>1</sup>H NMR (400 MHz, Chloroform-*d*) of compound **5e**

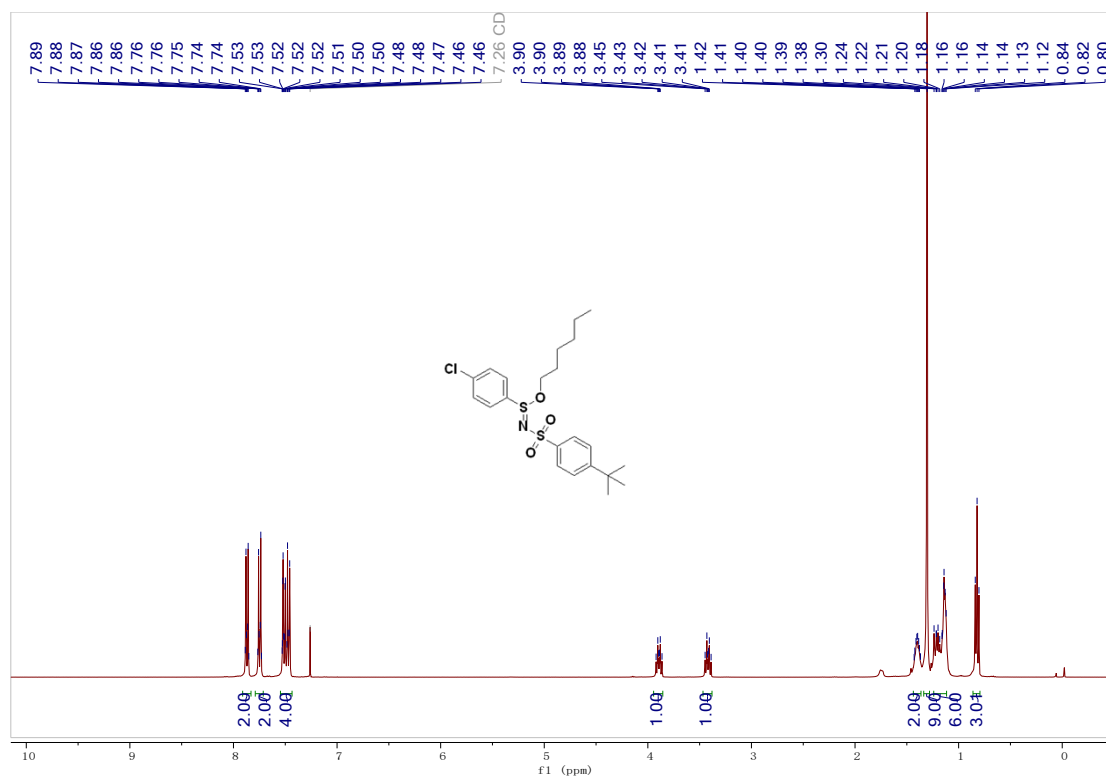

<sup>13</sup>C NMR (100 MHz, Chloroform-*d*) of compound **5e**

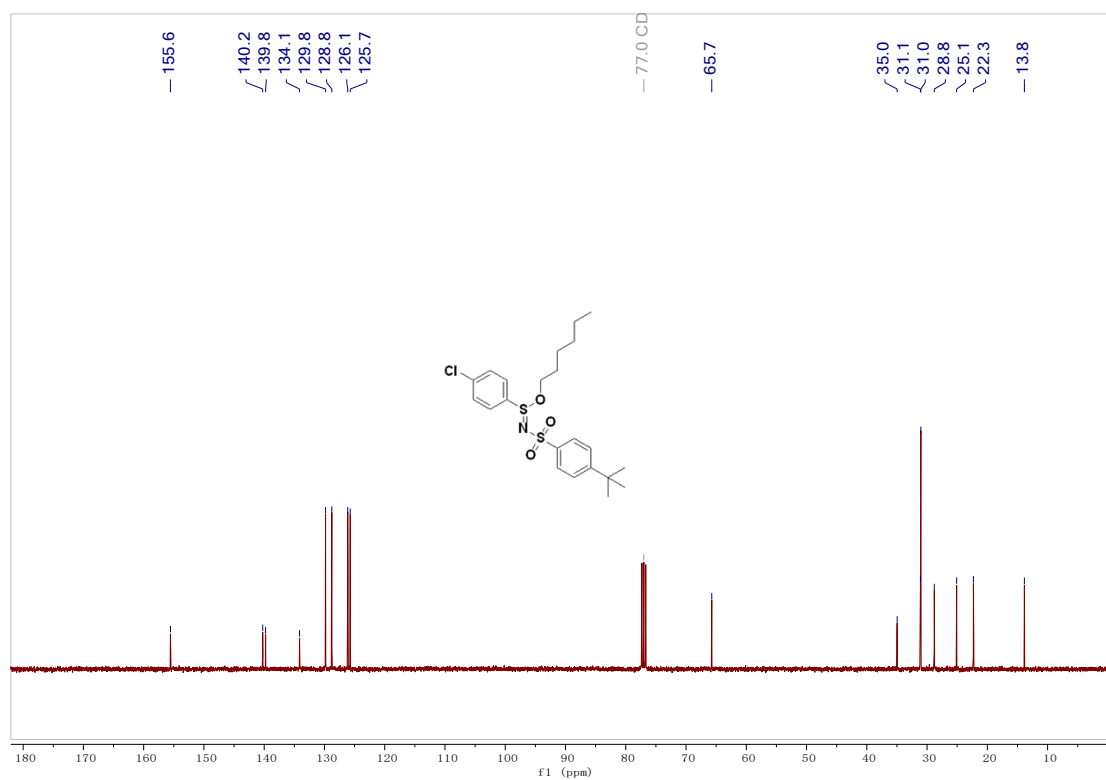

**<sup>1</sup>H NMR (400 MHz, Chloroform-*d*) of compound 5f**

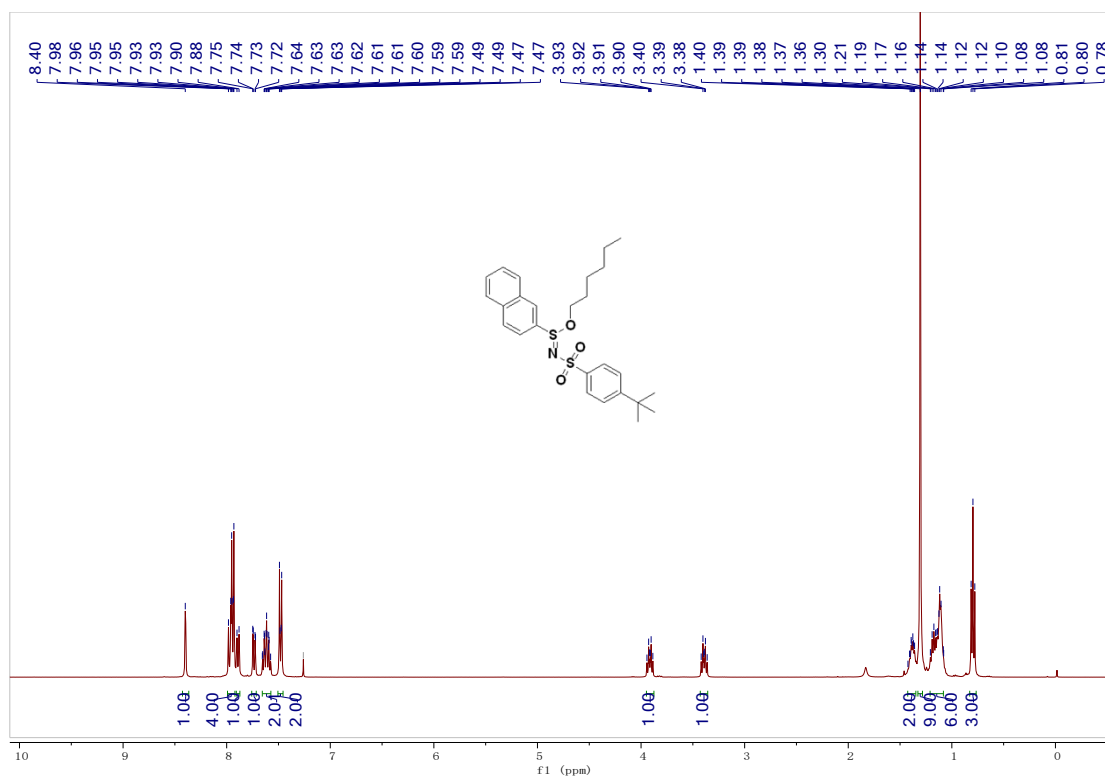

**<sup>13</sup>C NMR (100 MHz, Chloroform-*d*) of compound 5f**

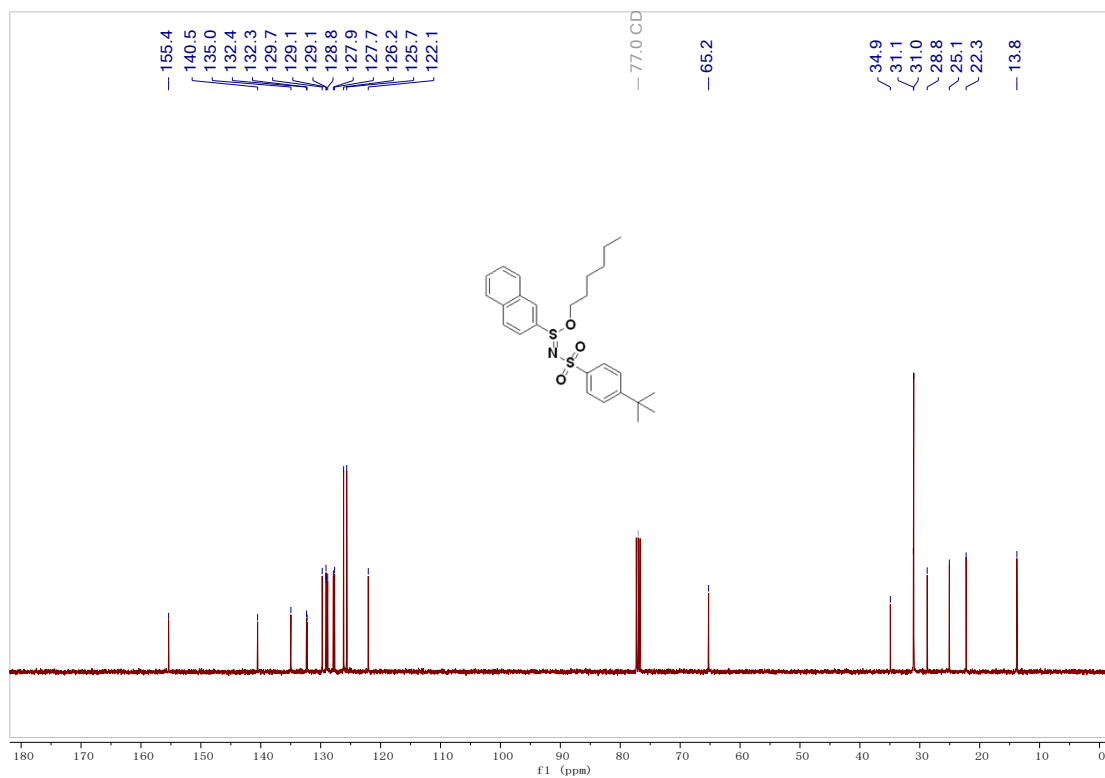

<sup>1</sup>H NMR (400 MHz, Chloroform-*d*) of compound **5g**

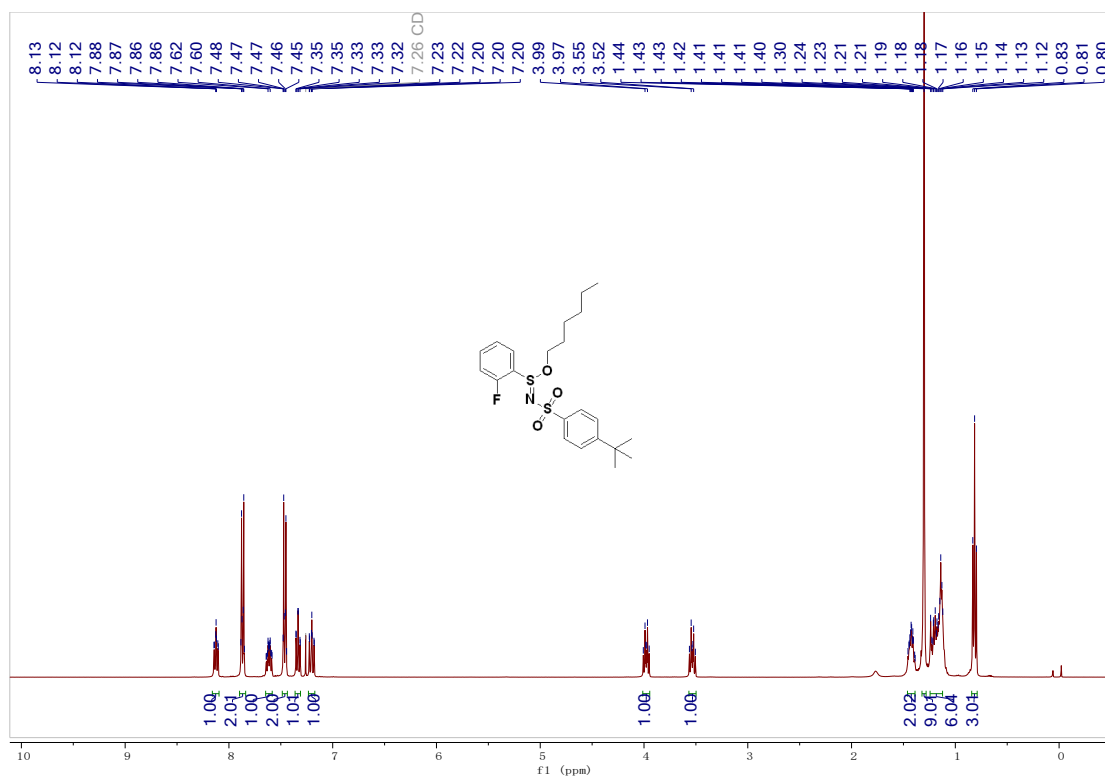

<sup>13</sup>C NMR (100 MHz, Chloroform-*d*) of compound **5g**

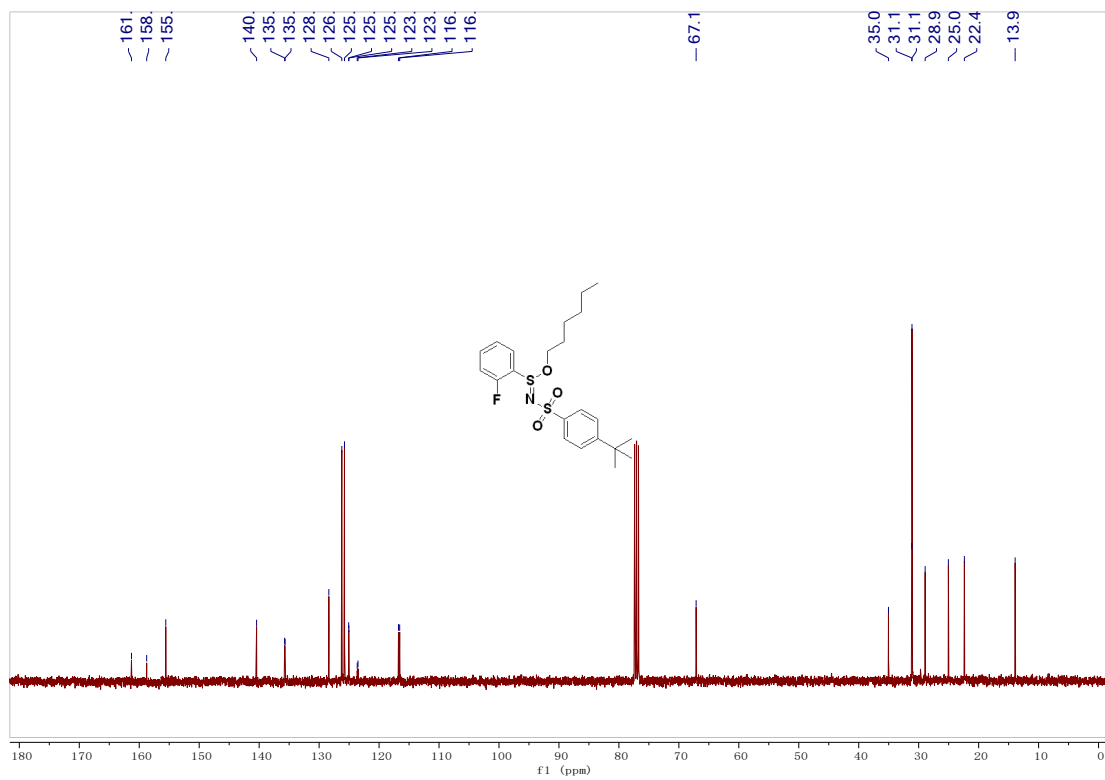

**<sup>19</sup>F NMR (376 MHz, Chloroform-*d*) of compound 5g**

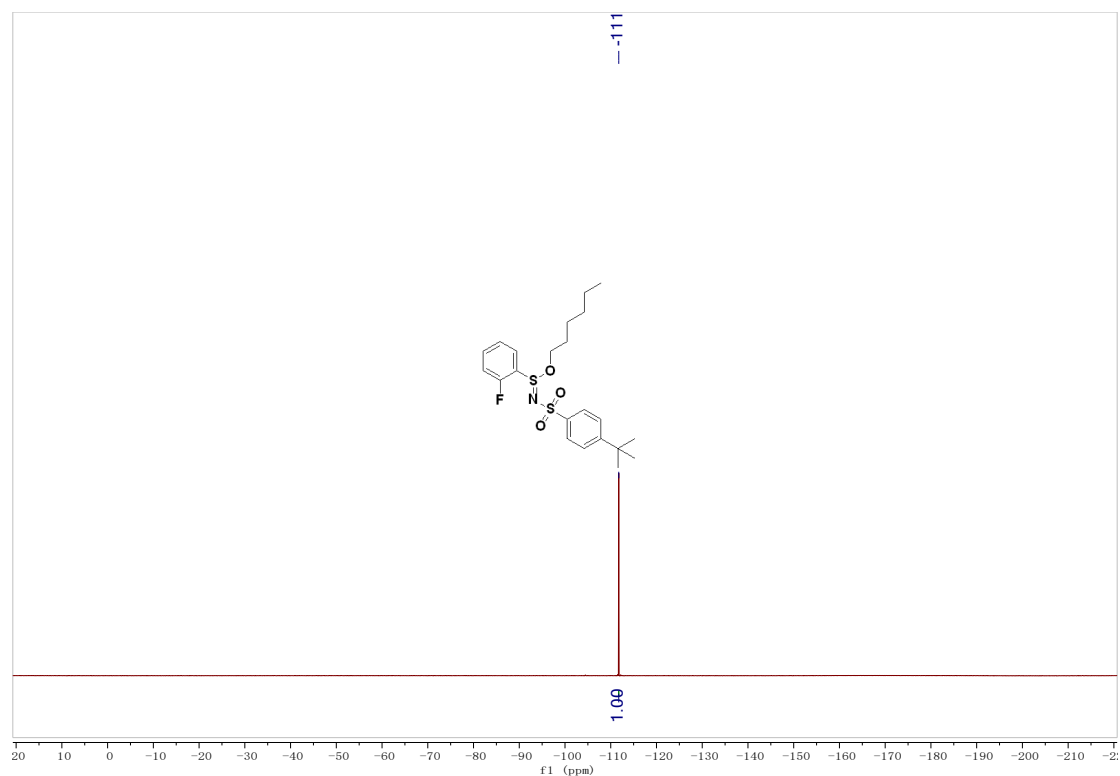

**<sup>1</sup>H NMR (400 MHz, Chloroform-*d*) of compound 5h**

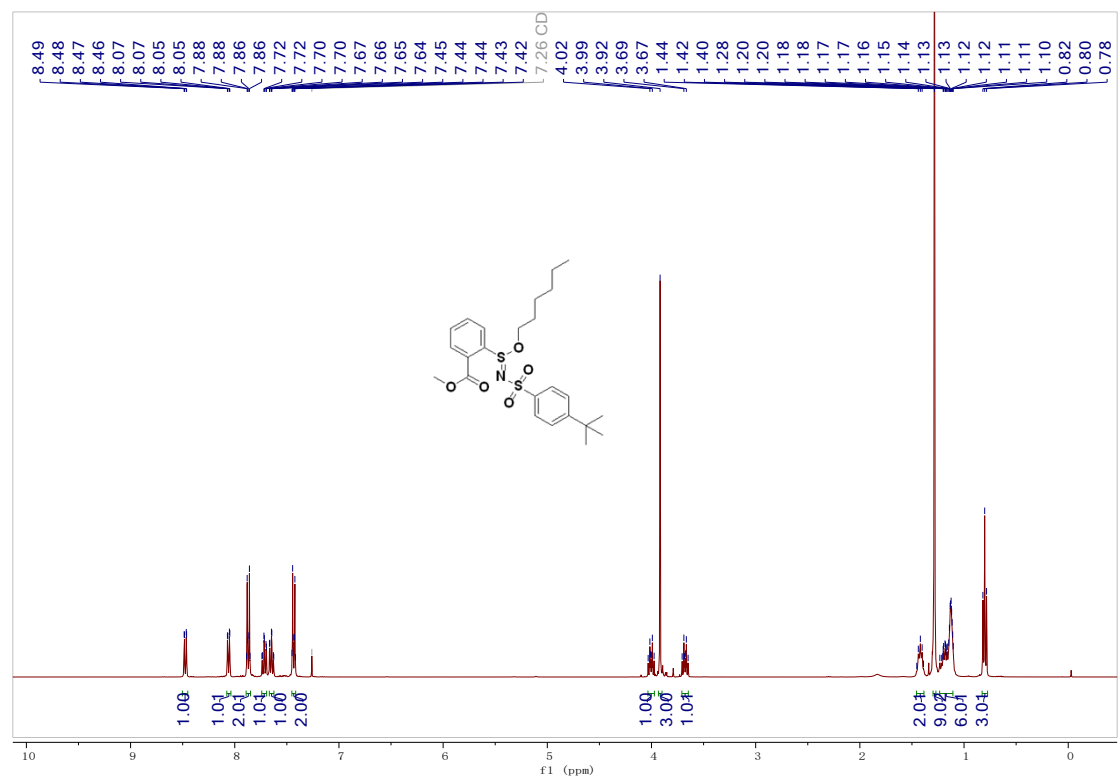



<sup>13</sup>C NMR (100 MHz, Chloroform-*d*) of compound **5h**

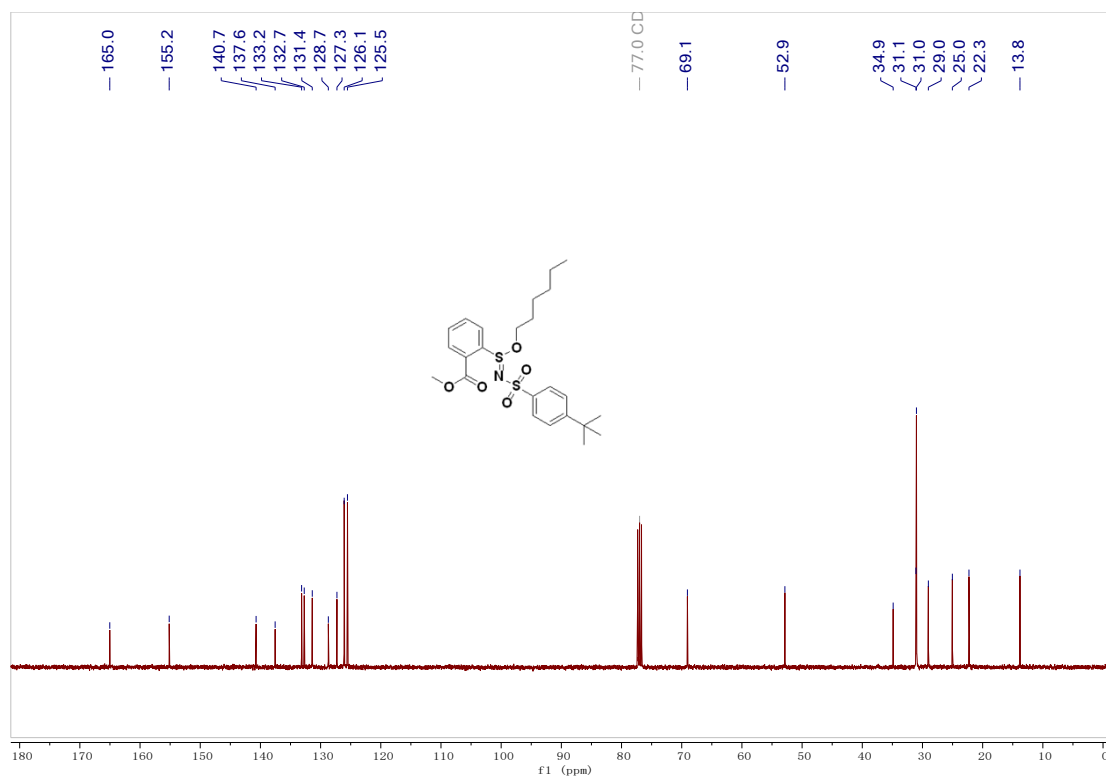

<sup>1</sup>H NMR (400 MHz, Chloroform-*d*) of compound **5i**

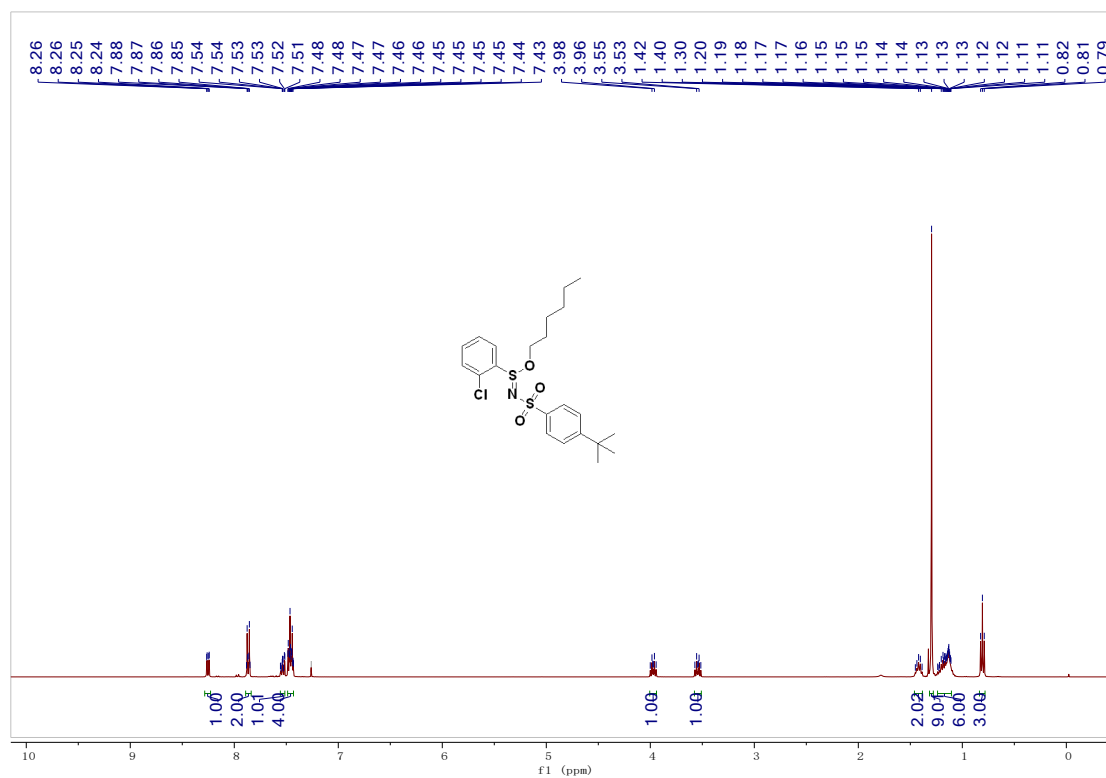

<sup>13</sup>C NMR (100 MHz, Chloroform-*d*) of compound **5i**

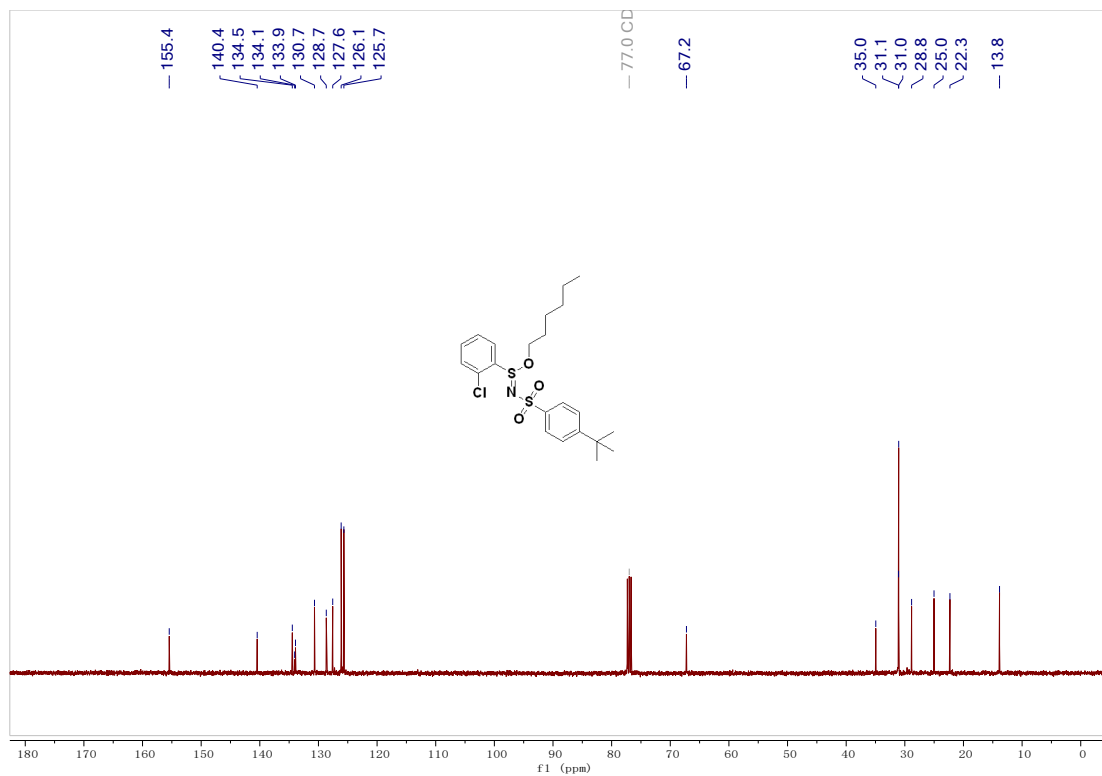

<sup>1</sup>H NMR (400 MHz, Chloroform-*d*) of compound **5j**

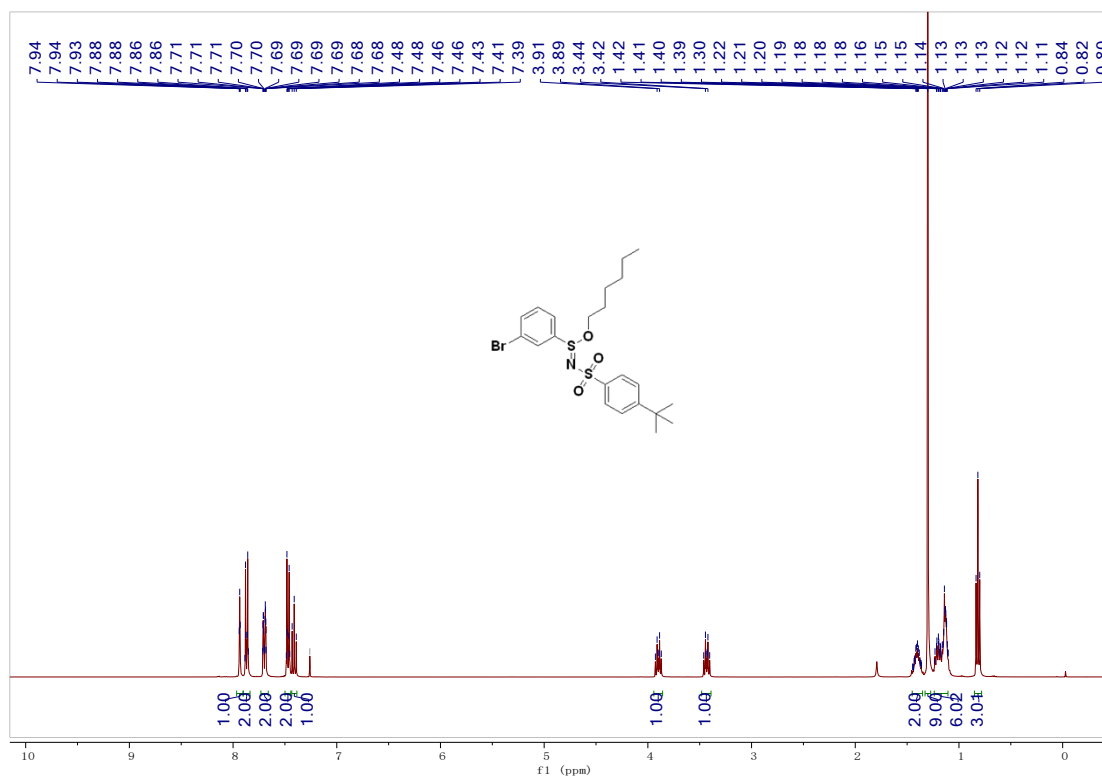

<sup>13</sup>C NMR (100 MHz, Chloroform-*d*) of compound **5j**

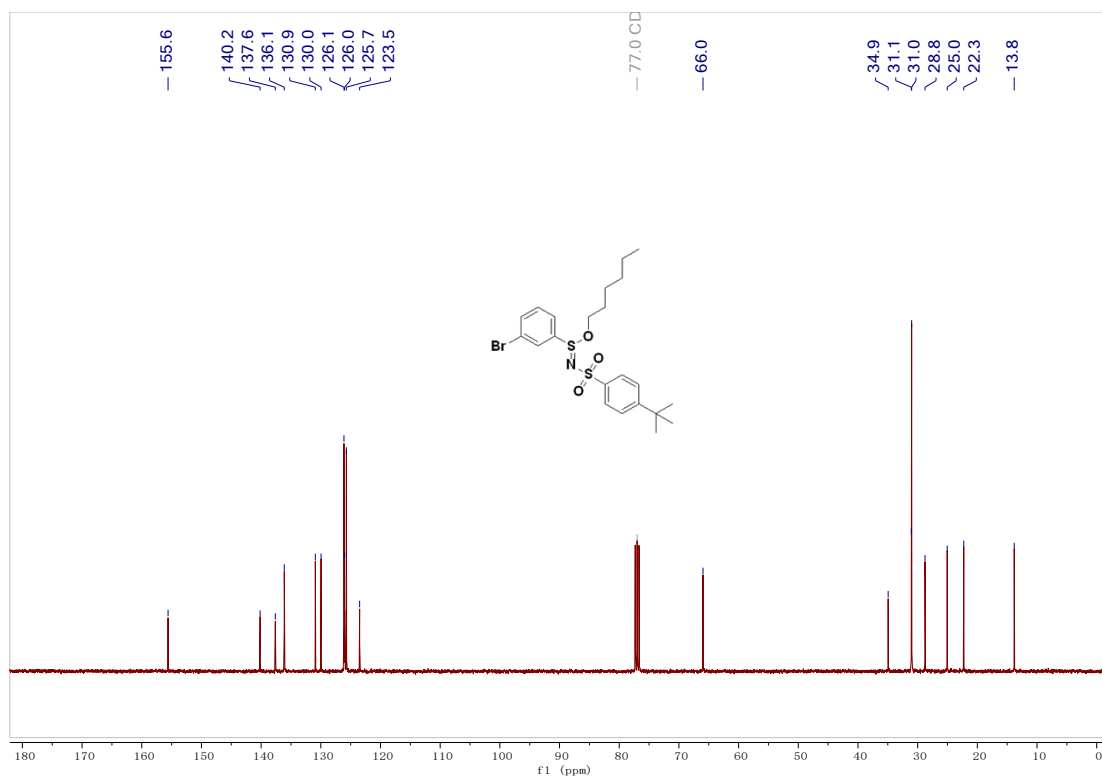

<sup>1</sup>H NMR (400 MHz, Chloroform-*d*) of compound **5k**

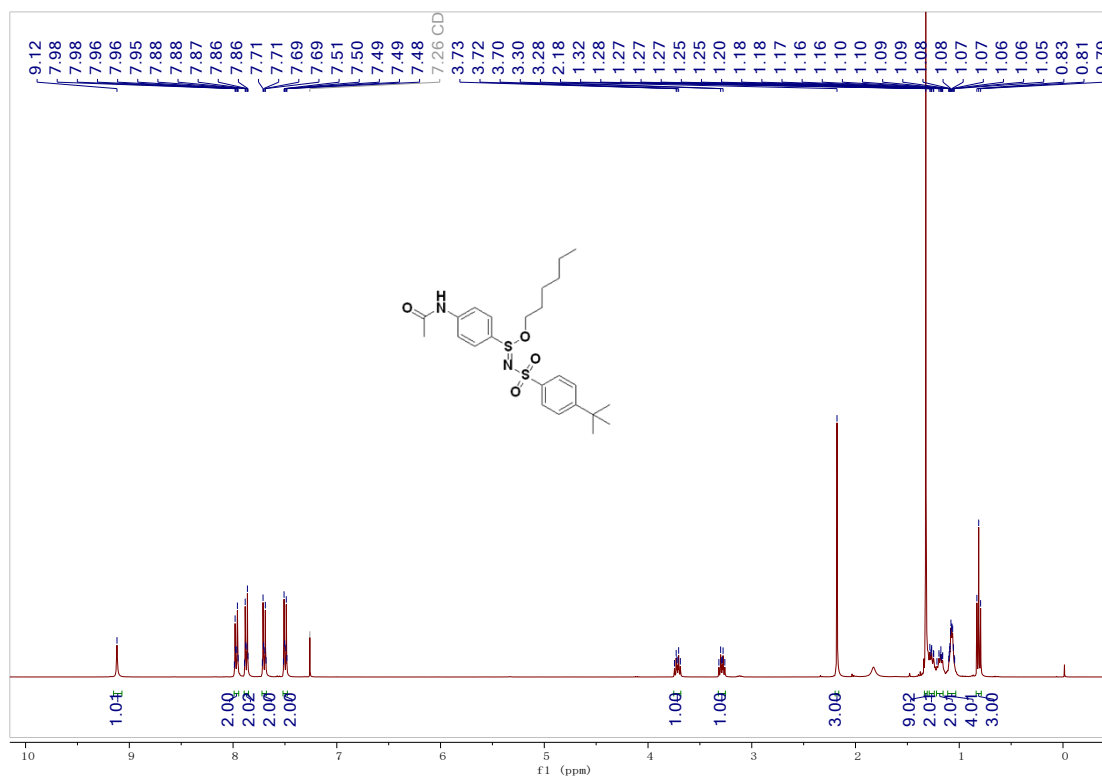

<sup>13</sup>C NMR (100 MHz, Chloroform-*d*) of compound **5k**

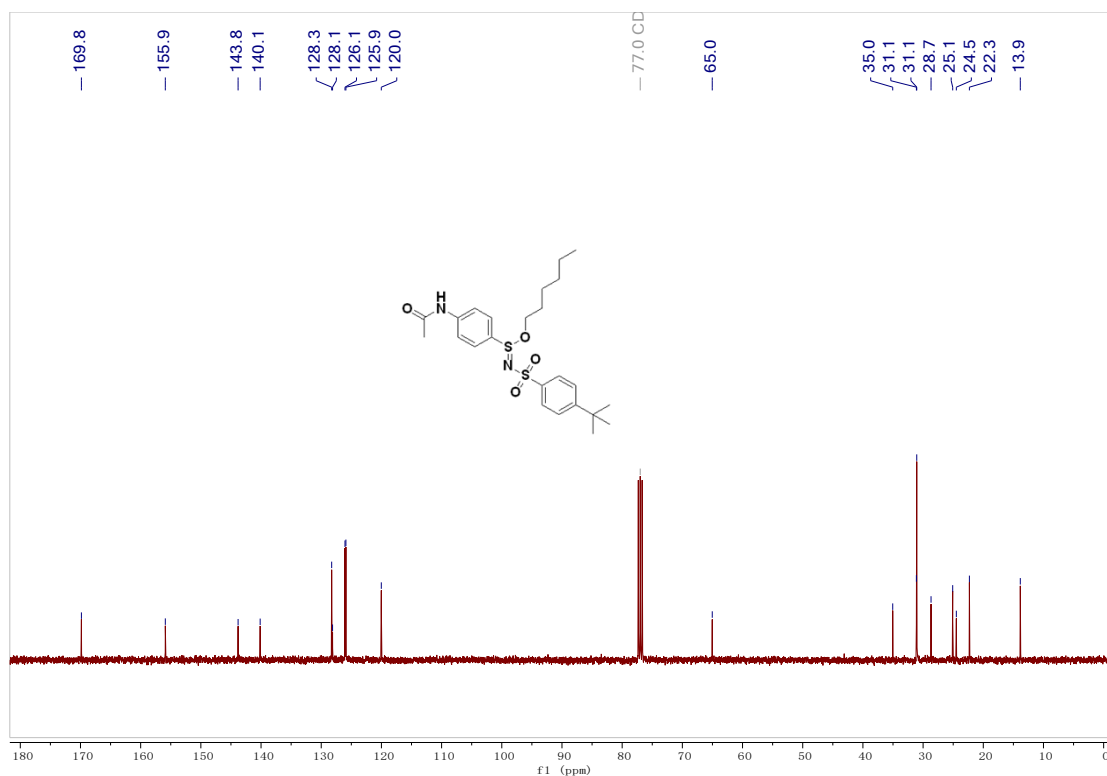

<sup>1</sup>H NMR (400 MHz, Chloroform-*d*) of compound **5l**

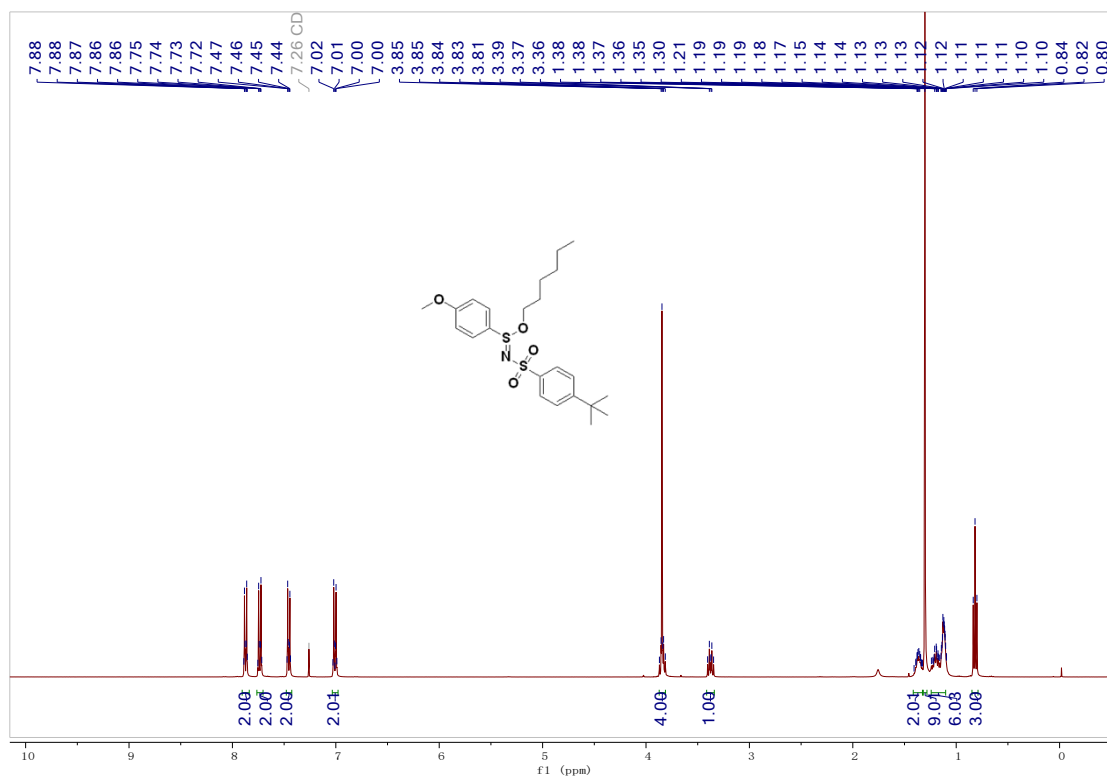

<sup>13</sup>C NMR (100 MHz, Chloroform-*d*) of compound **5l**

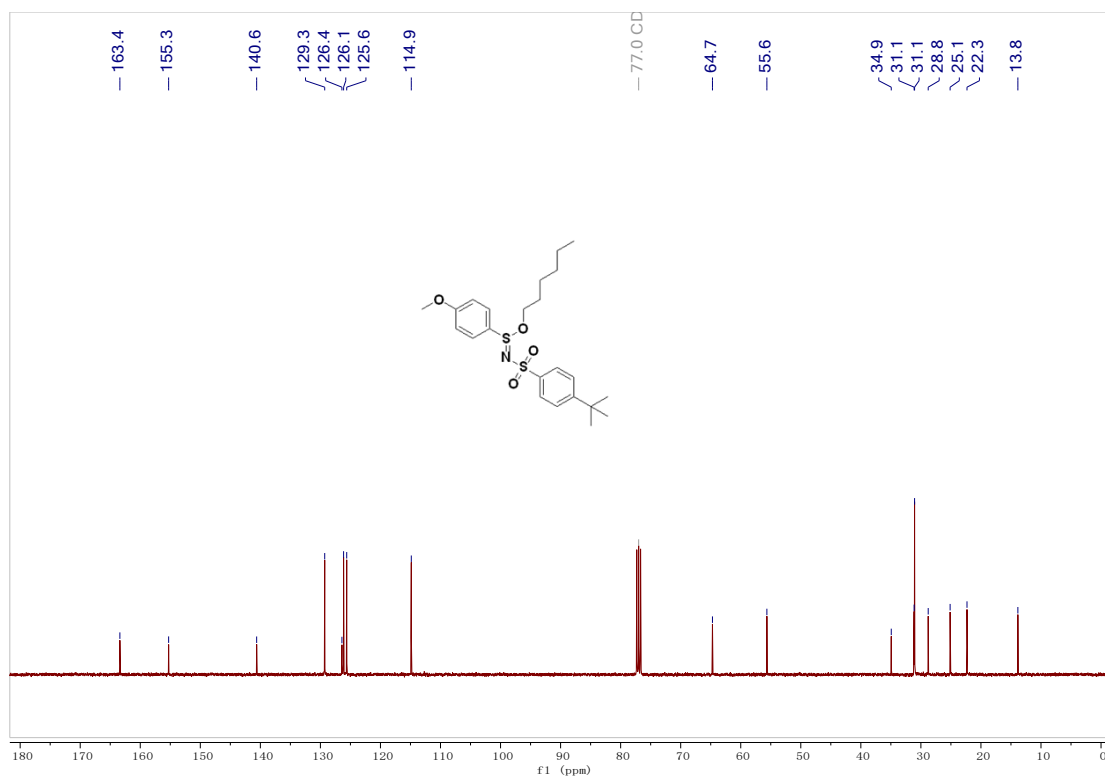

<sup>1</sup>H NMR (400 MHz, Chloroform-*d*) of compound **5m**

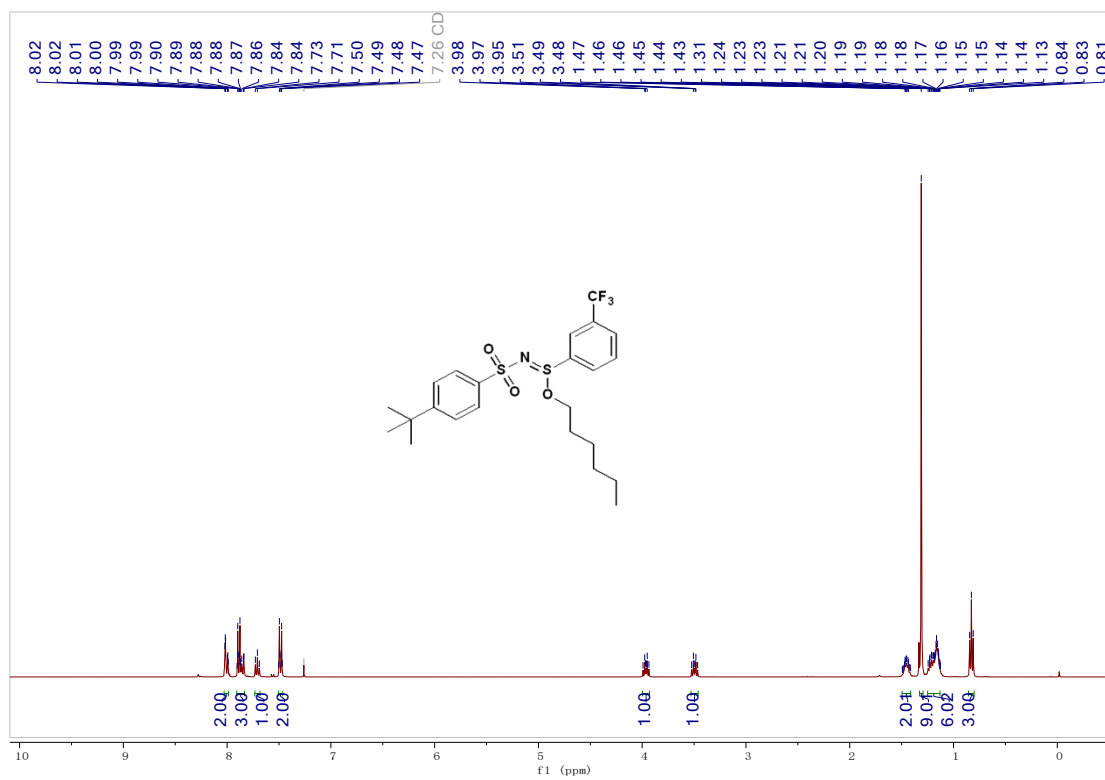

**<sup>13</sup>C NMR (100 MHz, Chloroform-*d*) of compound 5m**

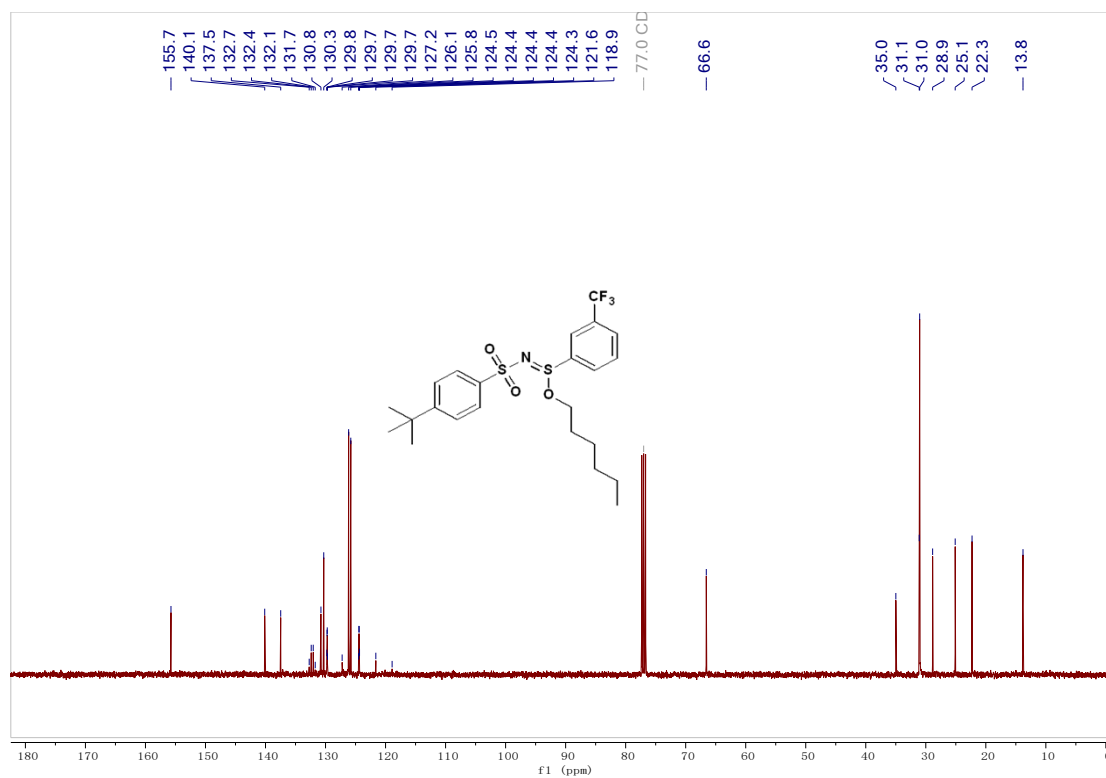

**<sup>19</sup>F NMR (376 MHz, Chloroform-*d*) of compound 5m**

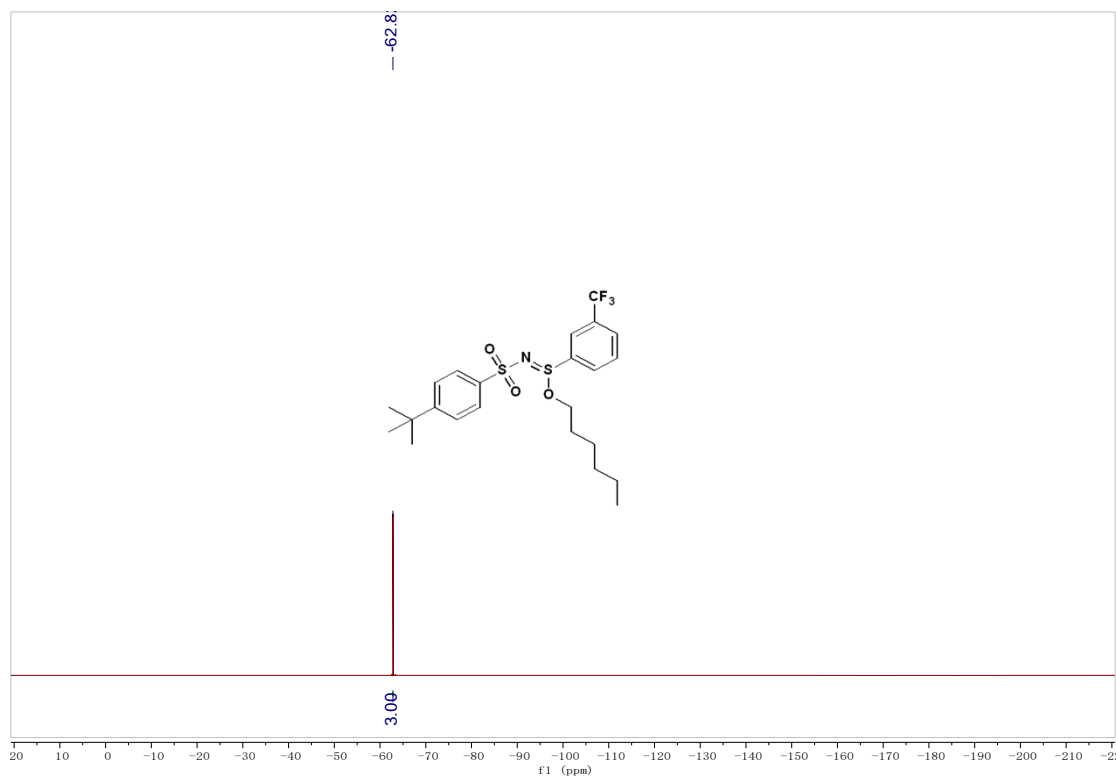

**<sup>1</sup>H NMR (400 MHz, Chloroform-*d*) of compound 5n**

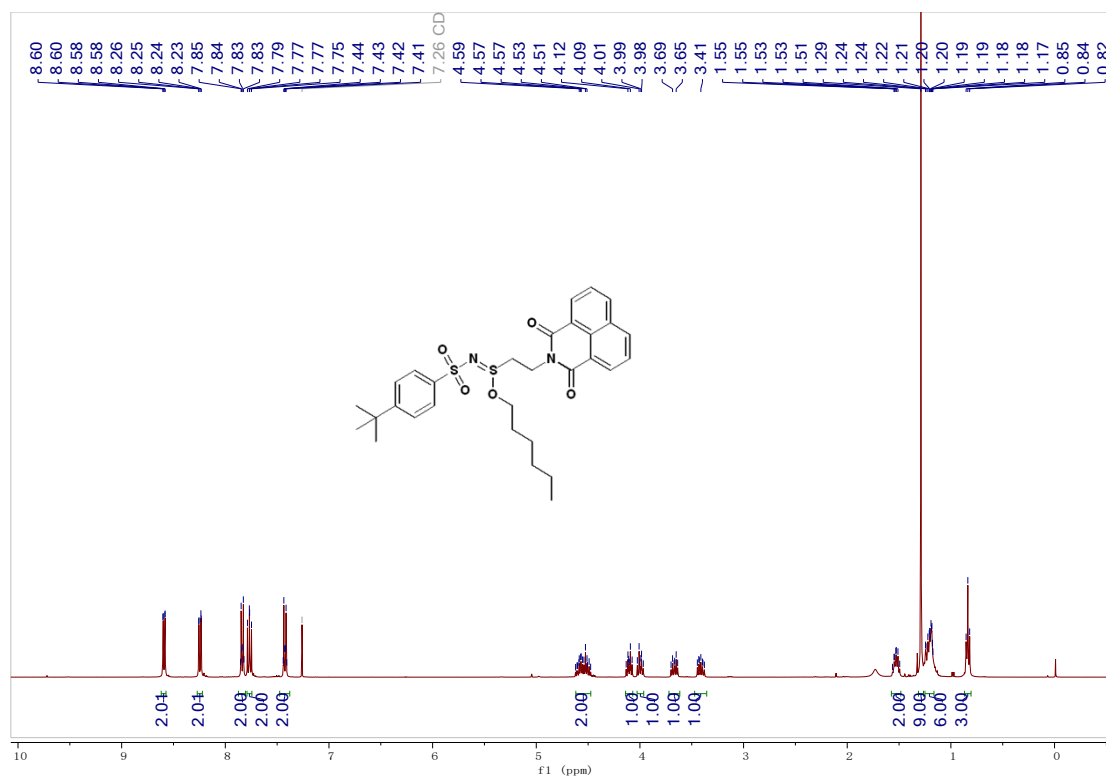

**<sup>13</sup>C NMR (100 MHz, Chloroform-*d*) of compound 5n**

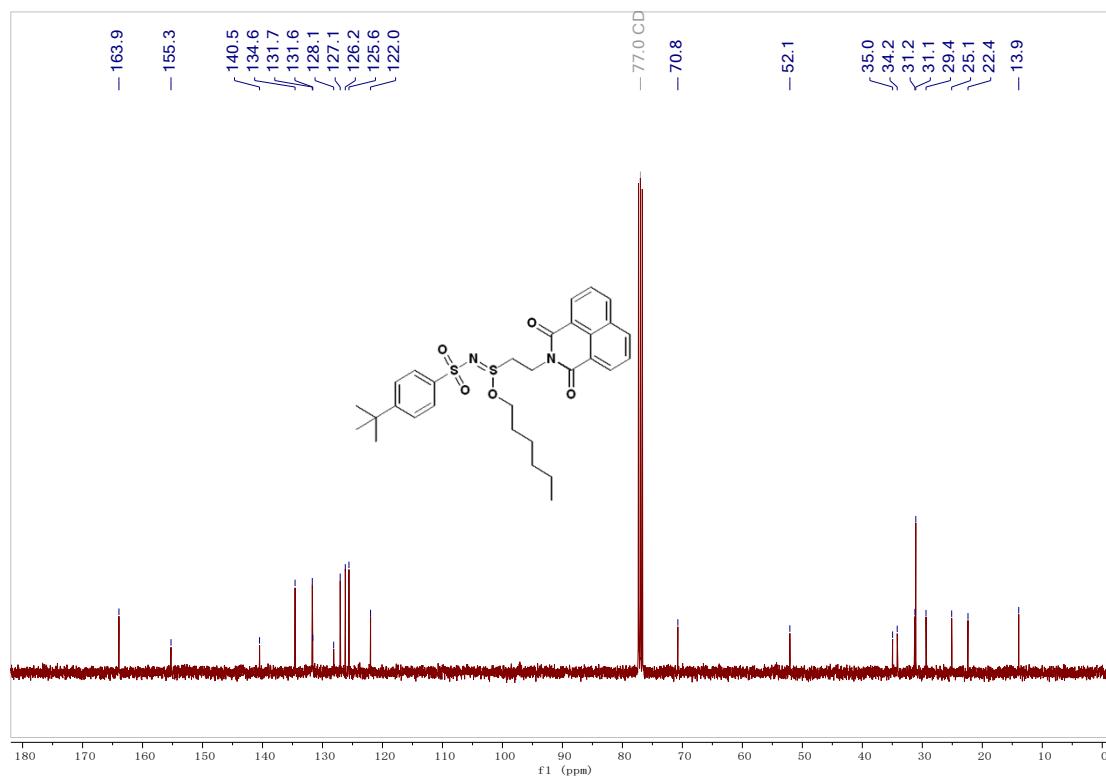

**<sup>1</sup>H NMR (400 MHz, Chloroform-*d*) of compound 5o**

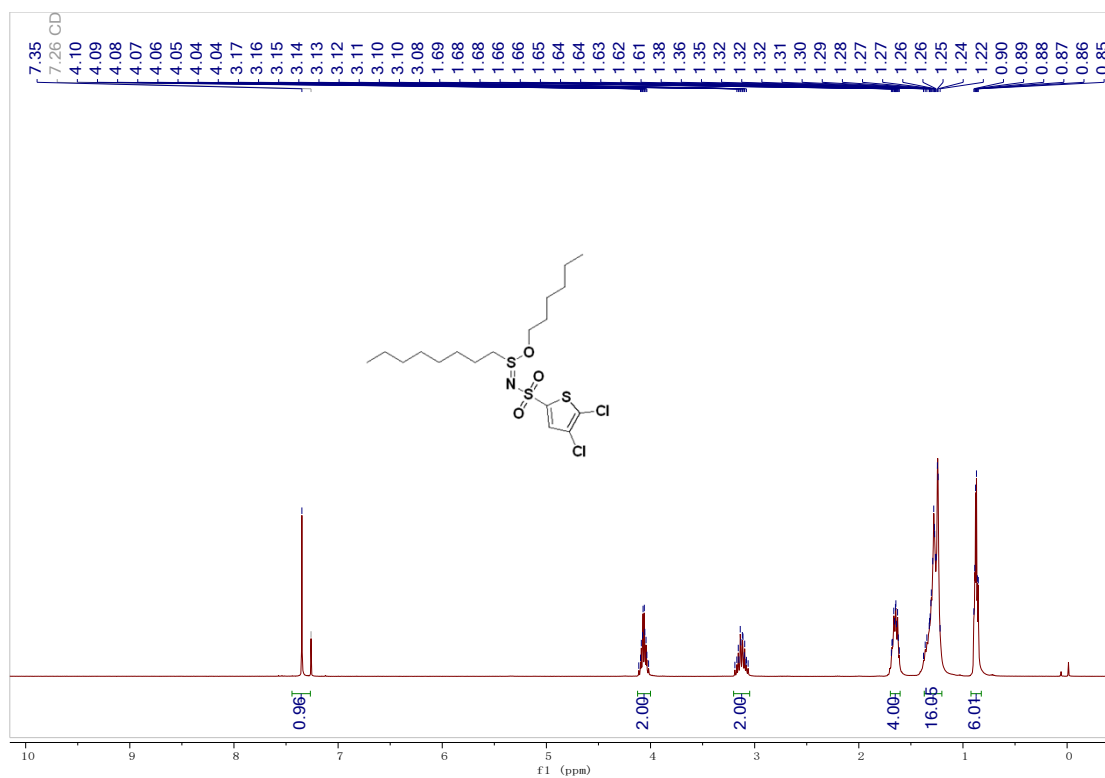

**<sup>13</sup>C NMR (100 MHz, Chloroform-*d*) of compound 5o**

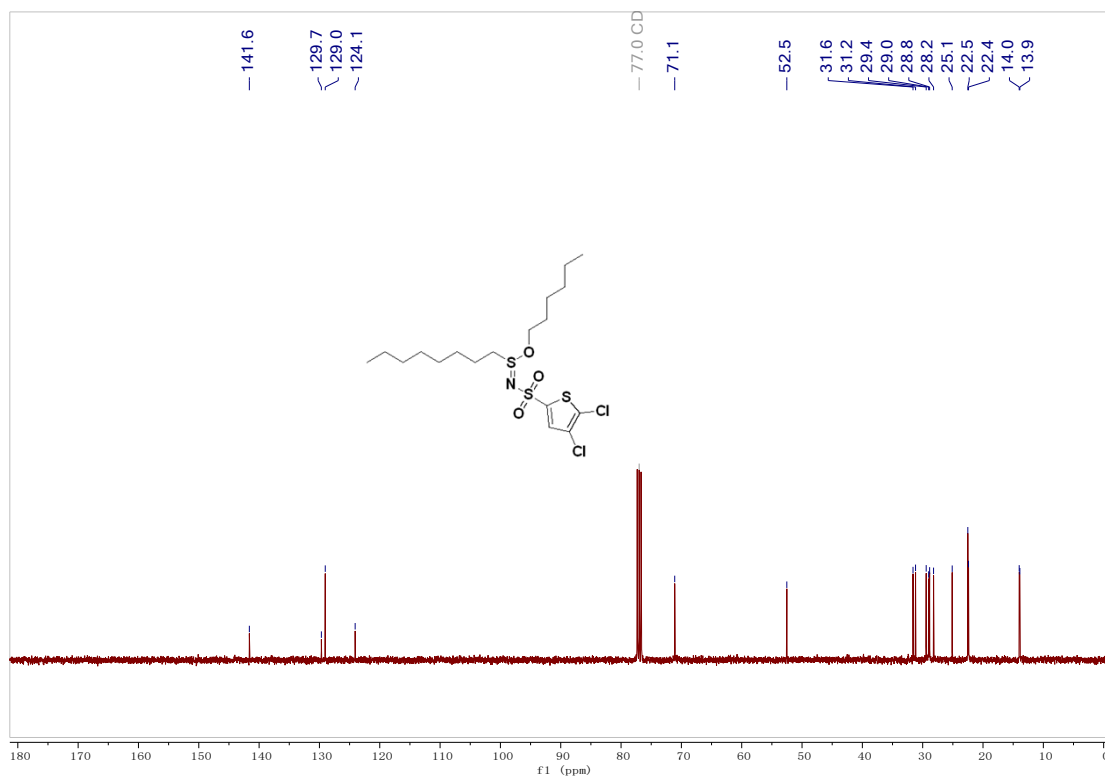



**<sup>1</sup>H NMR (400 MHz, Chloroform-*d*) of compound 5p**

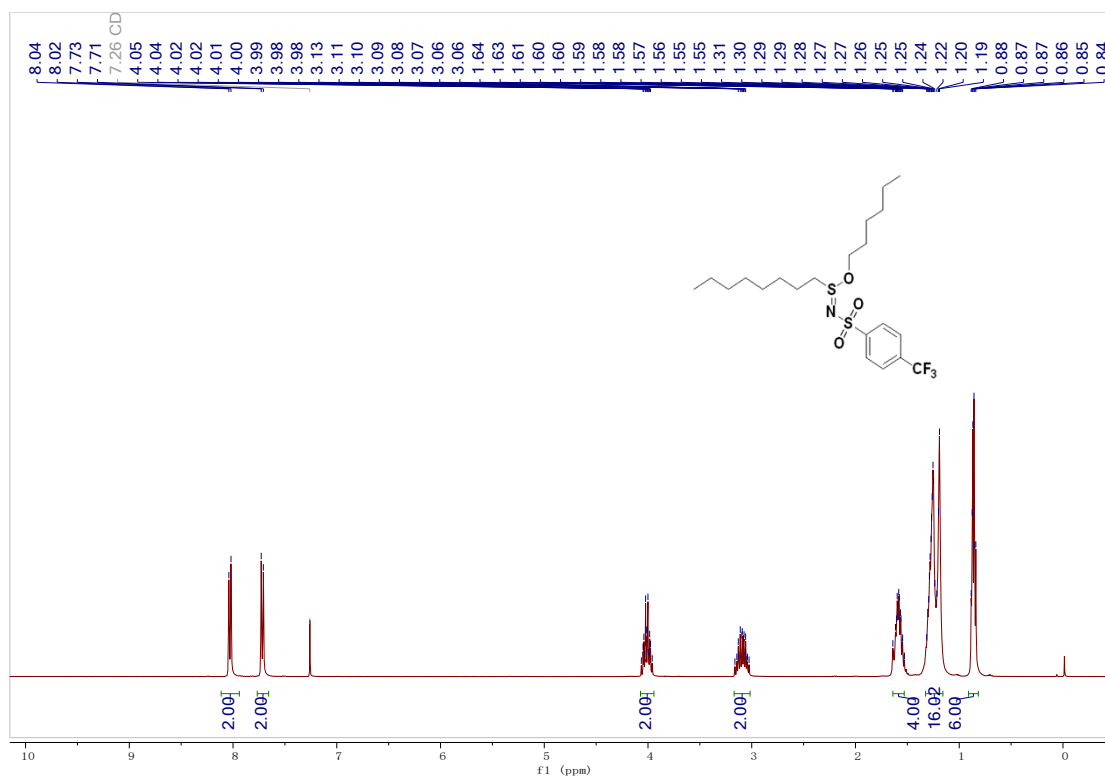

**<sup>13</sup>C NMR (100 MHz, Chloroform-*d*) of compound 5p**

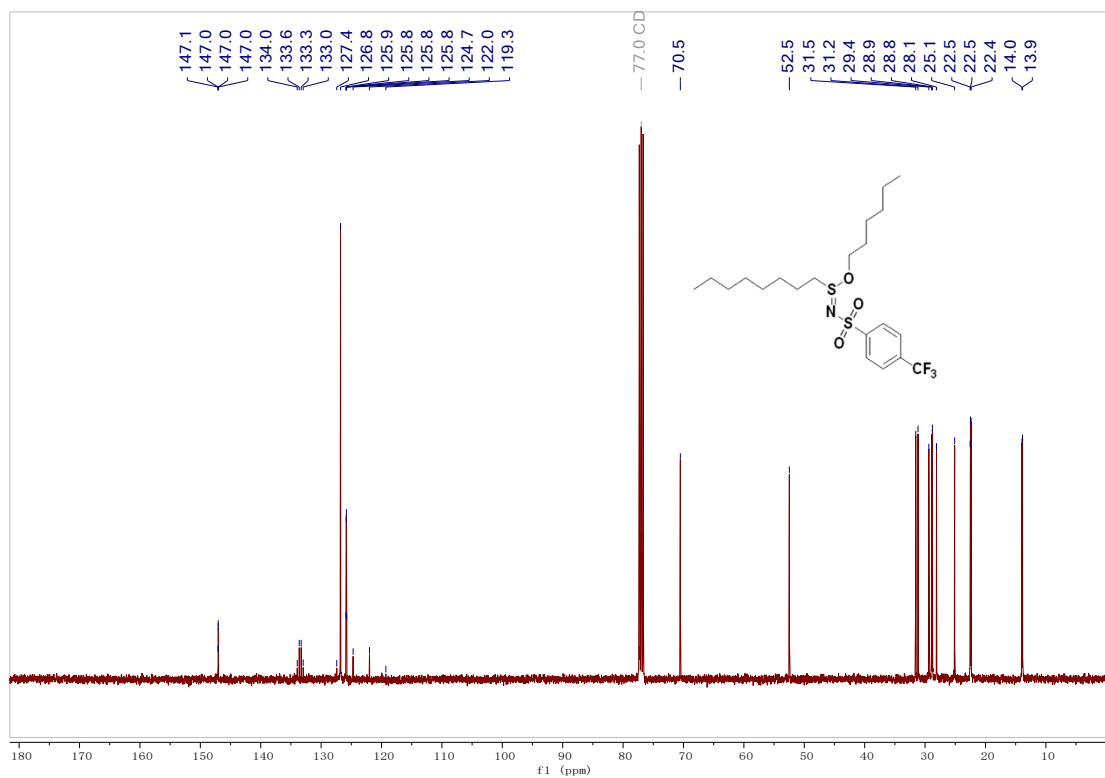

**<sup>19</sup>F NMR (376 MHz, Chloroform-d) of compound 5p**

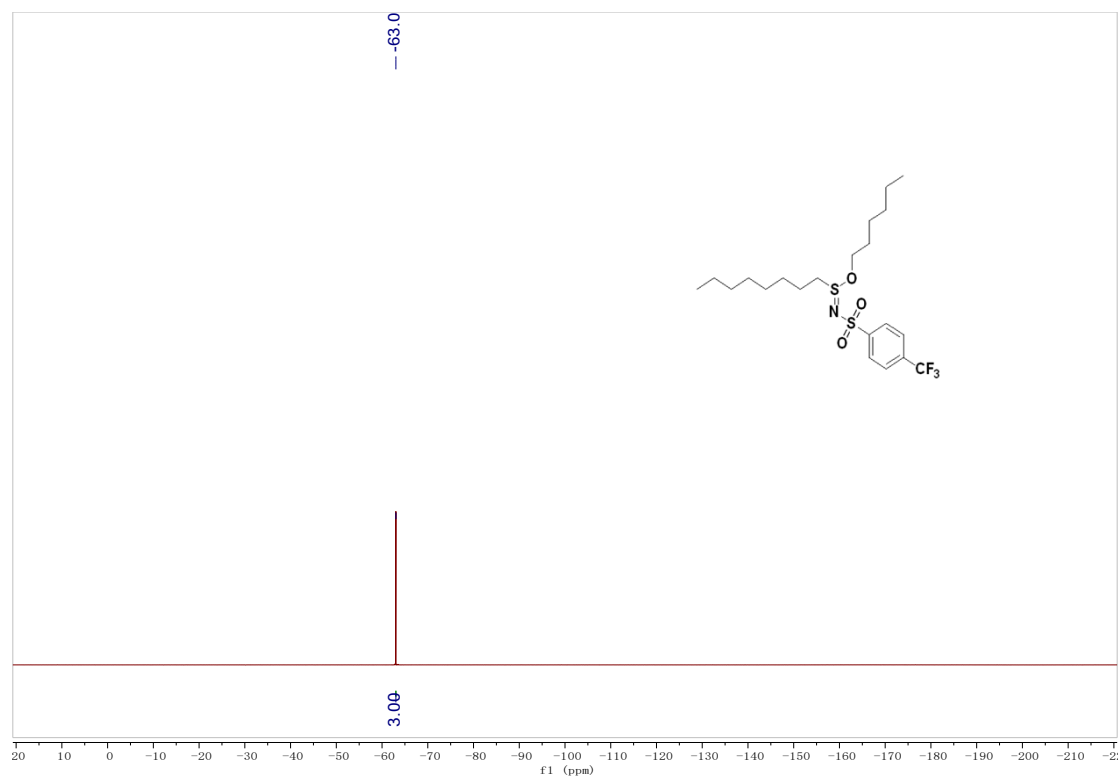

**<sup>1</sup>H NMR (400 MHz, Chloroform-d) of compound 5q**

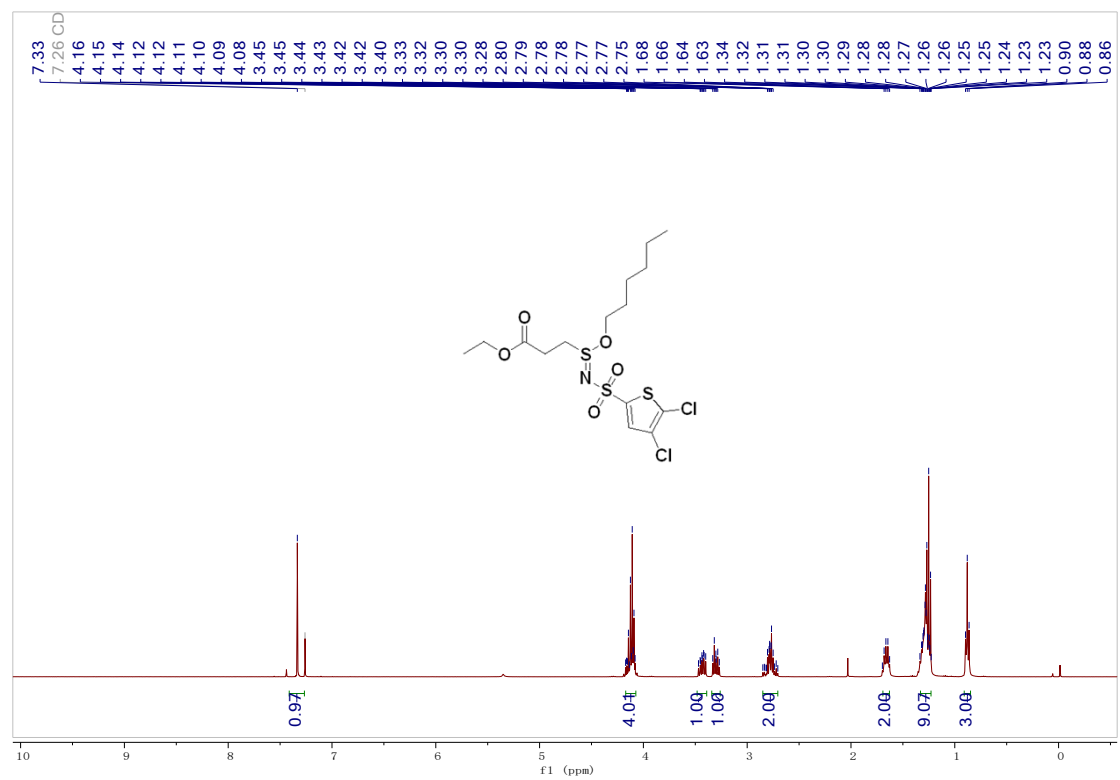

<sup>13</sup>C NMR (100 MHz, Chloroform-*d*) of compound **5q**

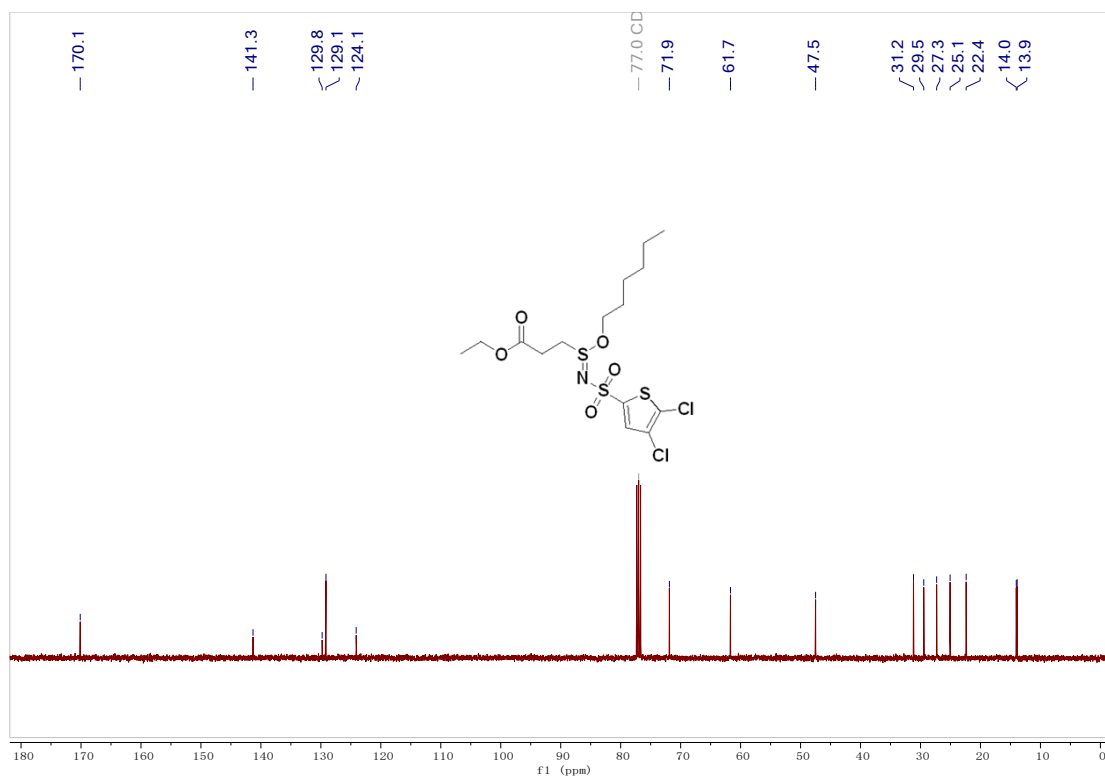

<sup>1</sup>H NMR (400 MHz, Chloroform-*d*) of compound **6a**

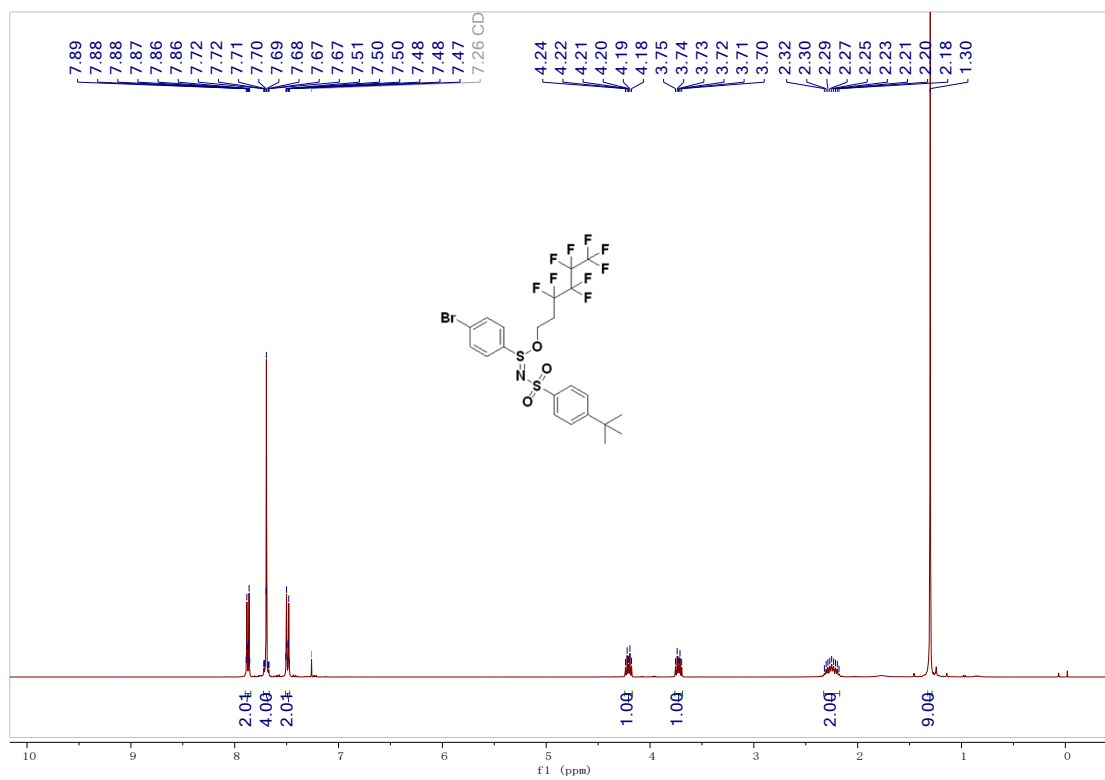





**<sup>1</sup>H NMR (400 MHz, Chloroform-*d*) of compound 6c**

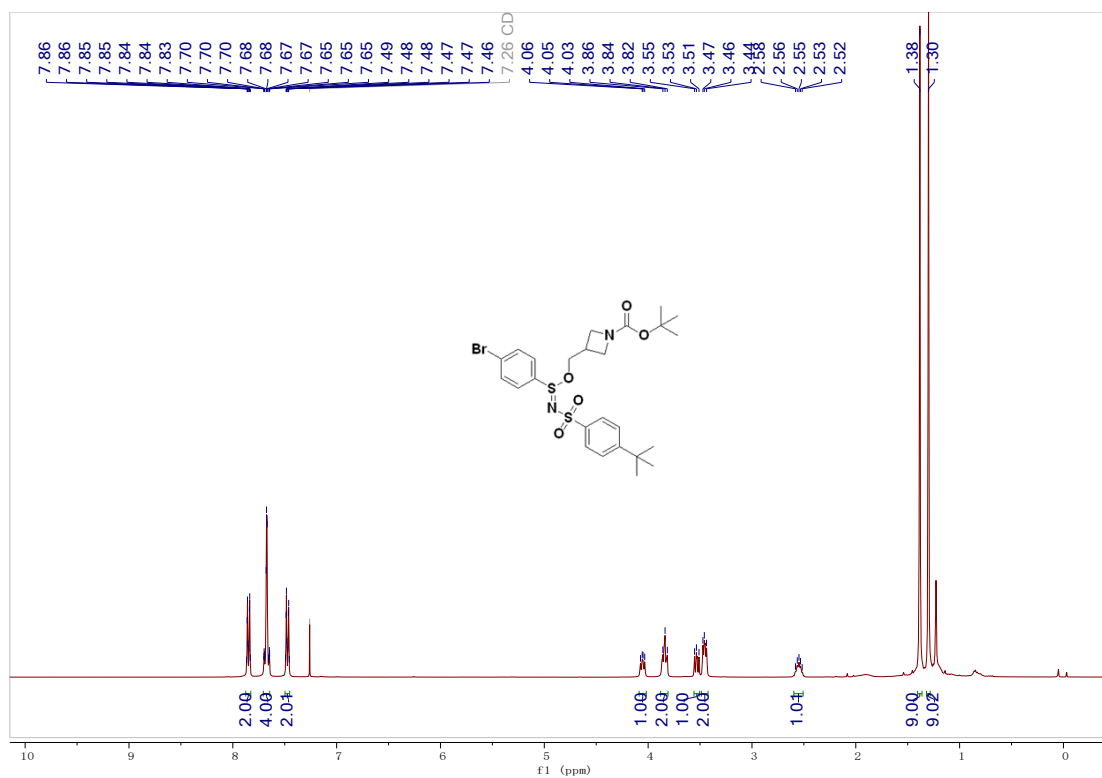

**<sup>13</sup>C NMR (100 MHz, Chloroform-*d*) of compound 6c**

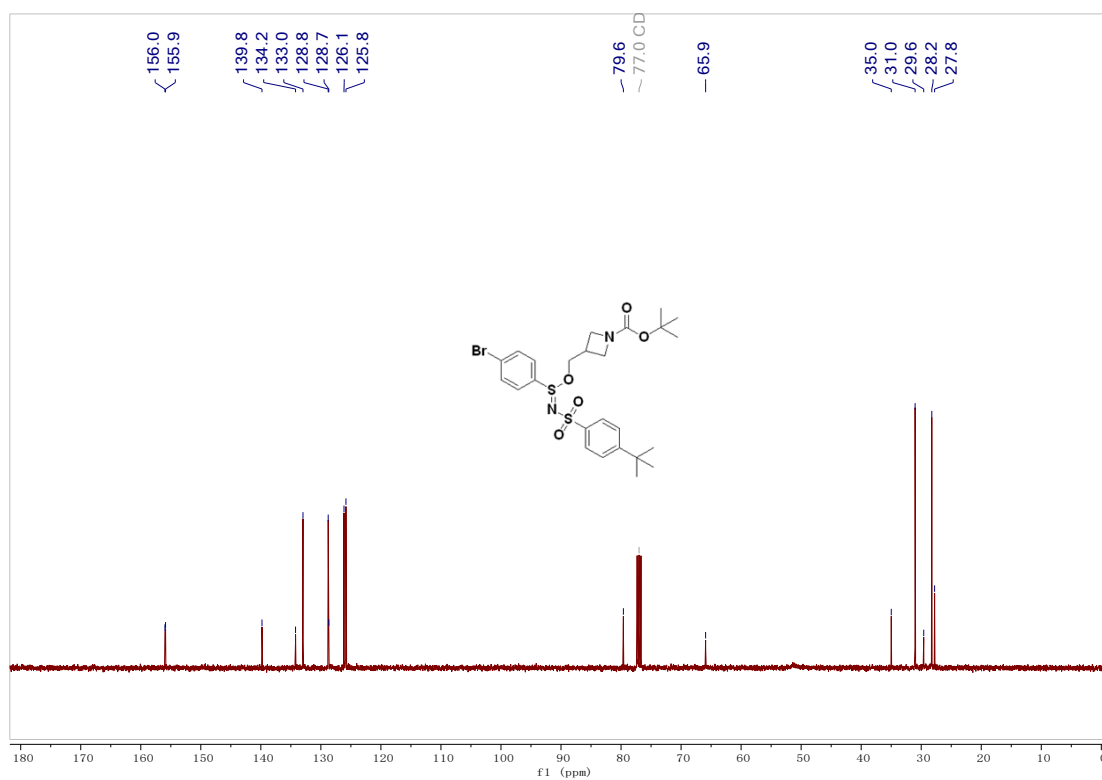

**<sup>1</sup>H NMR (400 MHz, Chloroform-*d*) of compound 6d**

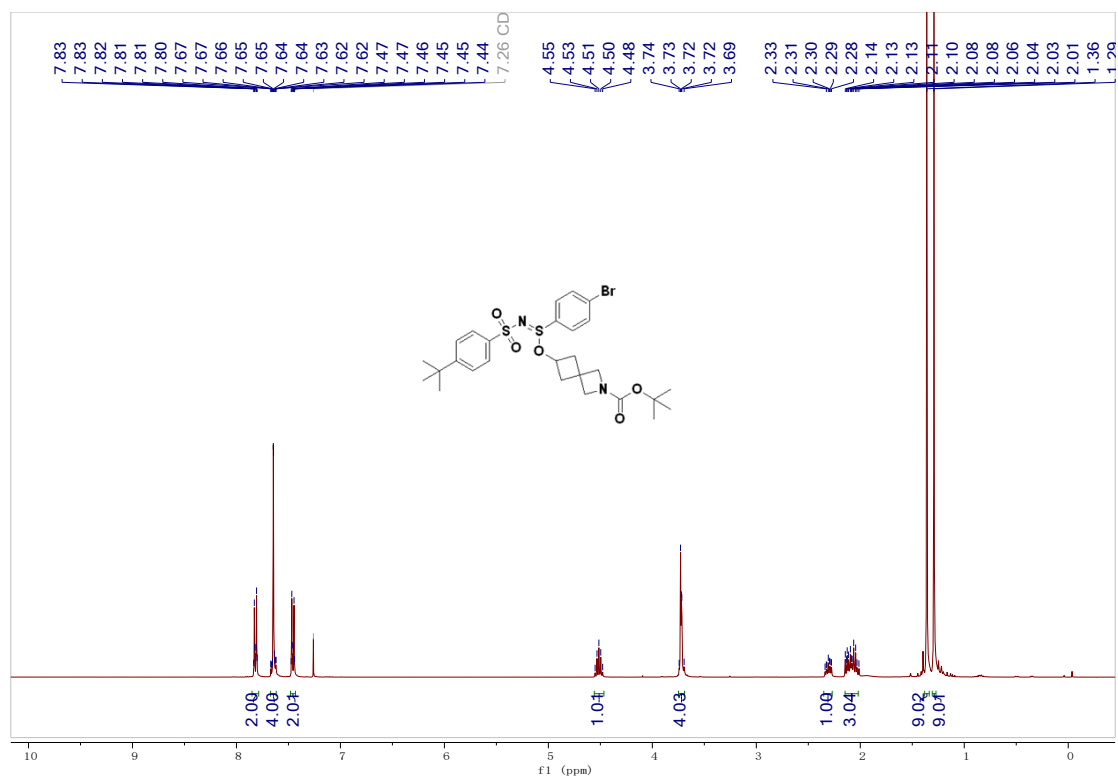

**<sup>13</sup>C NMR (100 MHz, Chloroform-*d*) of compound 6d**

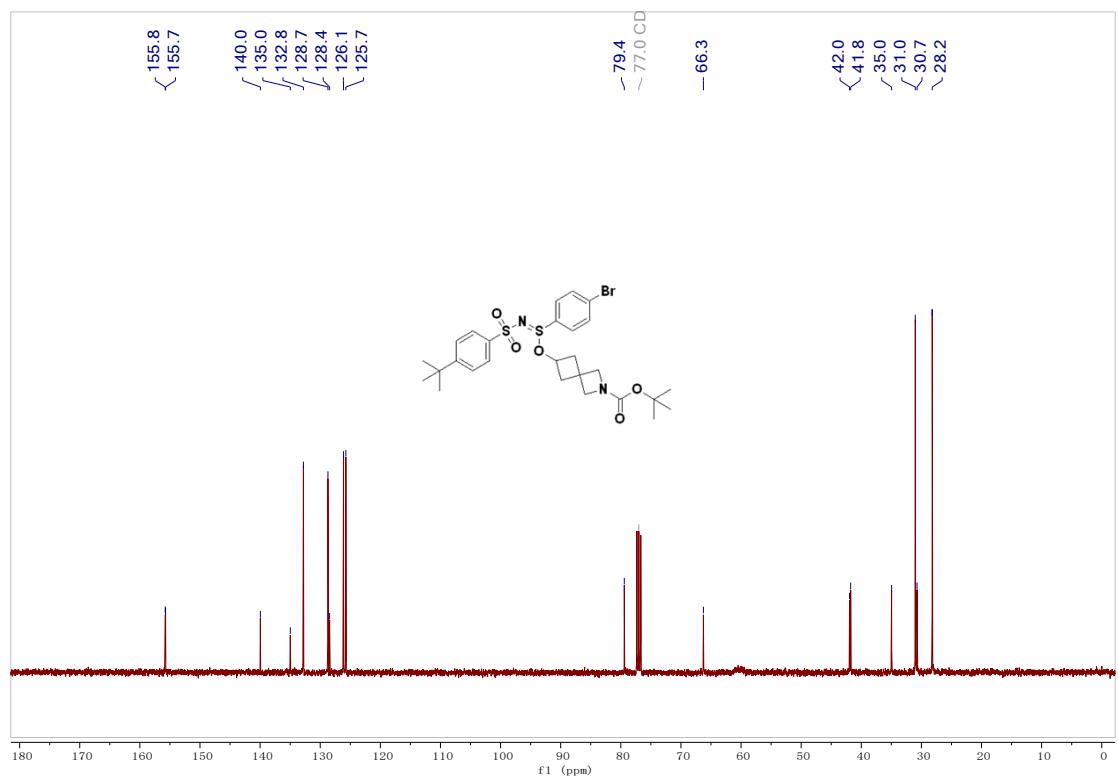

<sup>1</sup>H NMR (400 MHz, Chloroform-*d*) of compound **6e**

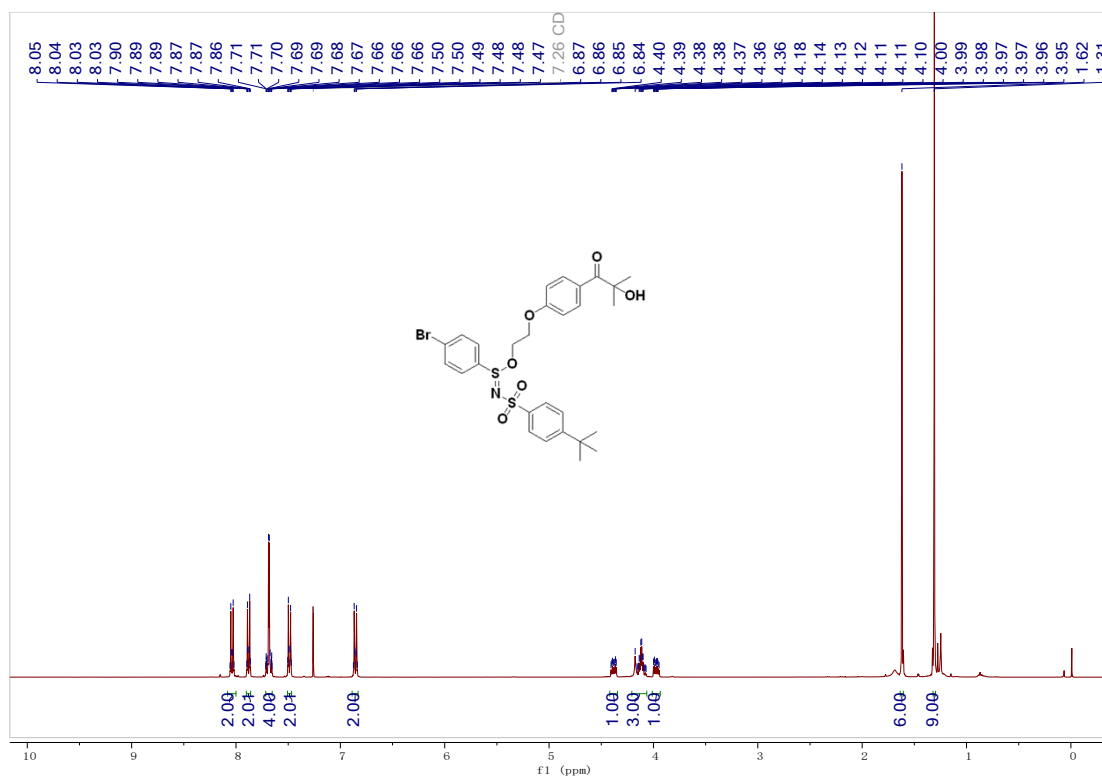

<sup>13</sup>C NMR (100 MHz, Chloroform-*d*) of compound **6e**

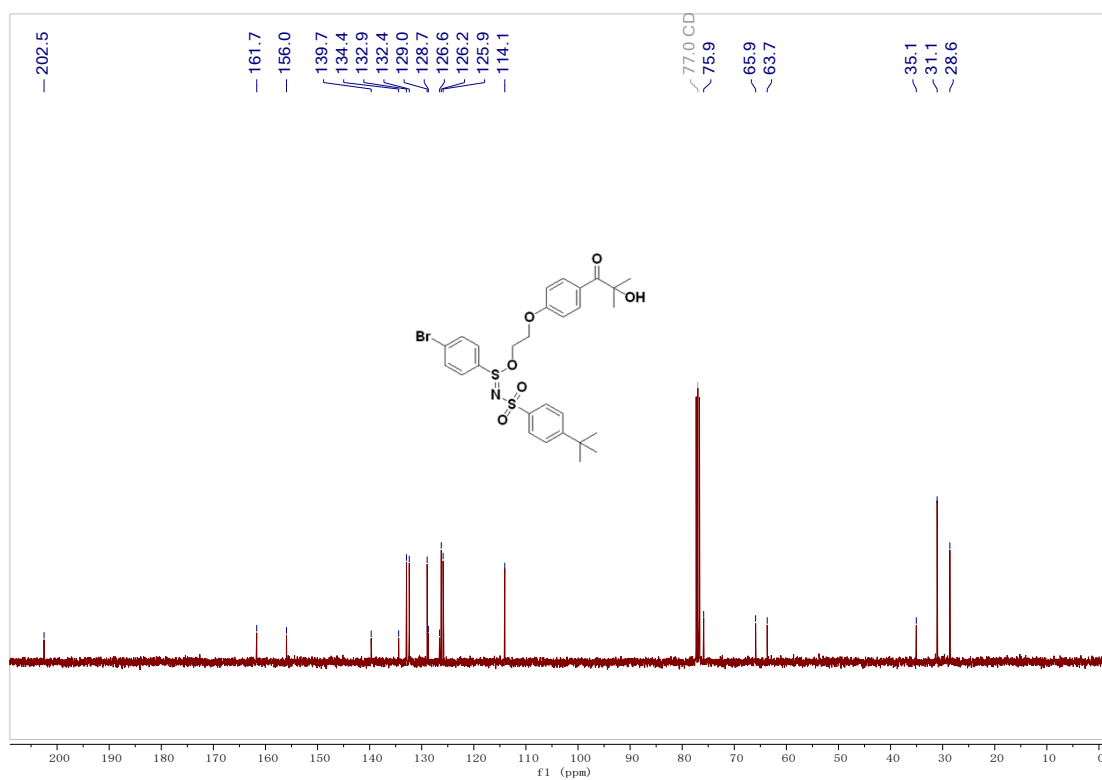



**<sup>1</sup>H NMR (400 MHz, Chloroform-*d*) of compound 6f**

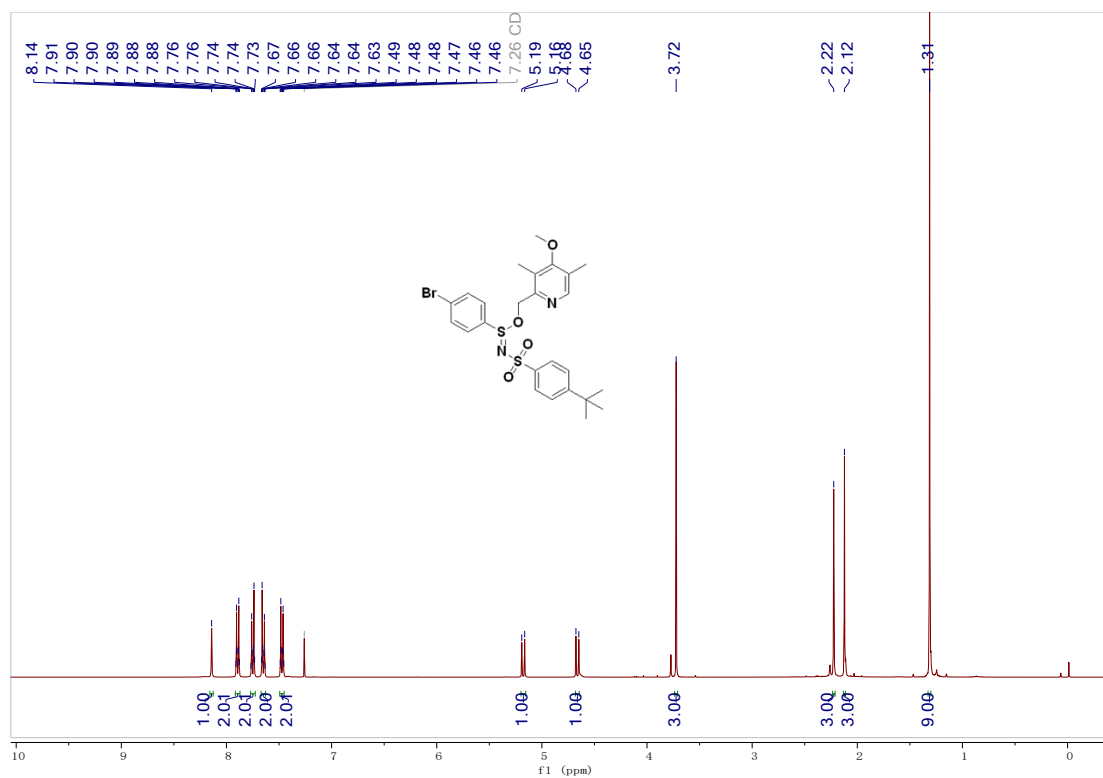

**<sup>13</sup>C NMR (100 MHz, Chloroform-*d*) of compound 6f**

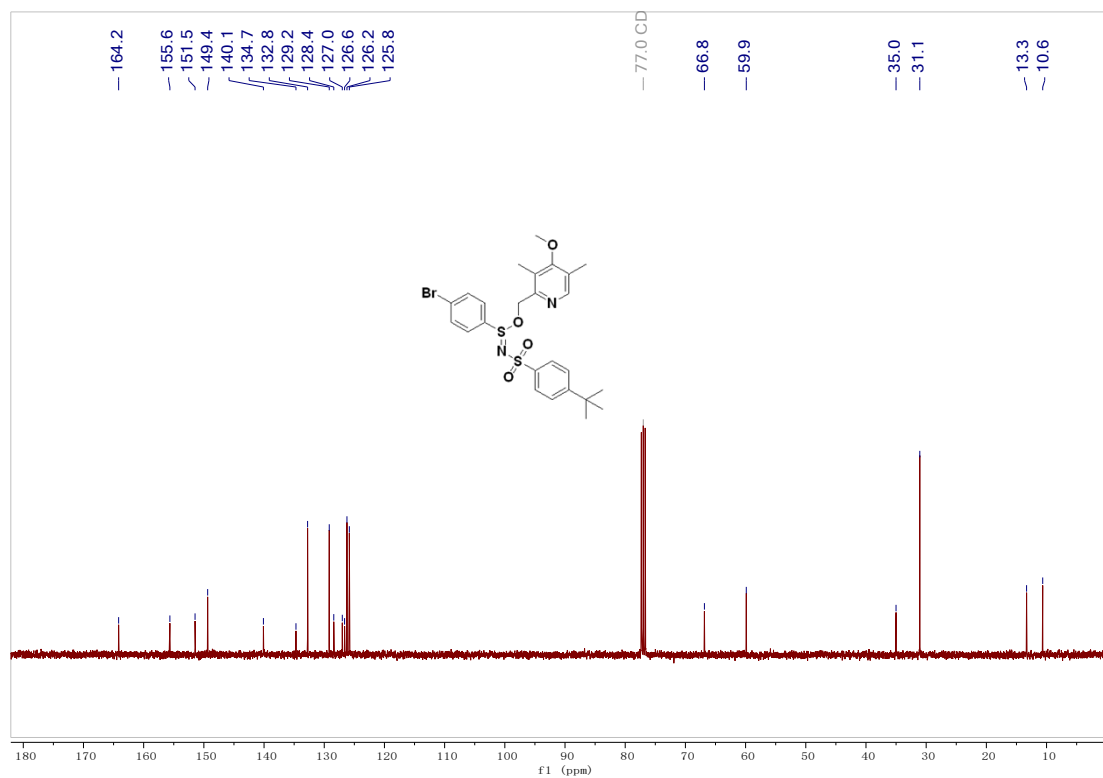

<sup>1</sup>H NMR (400 MHz, Chloroform-*d*) of compound **6g**

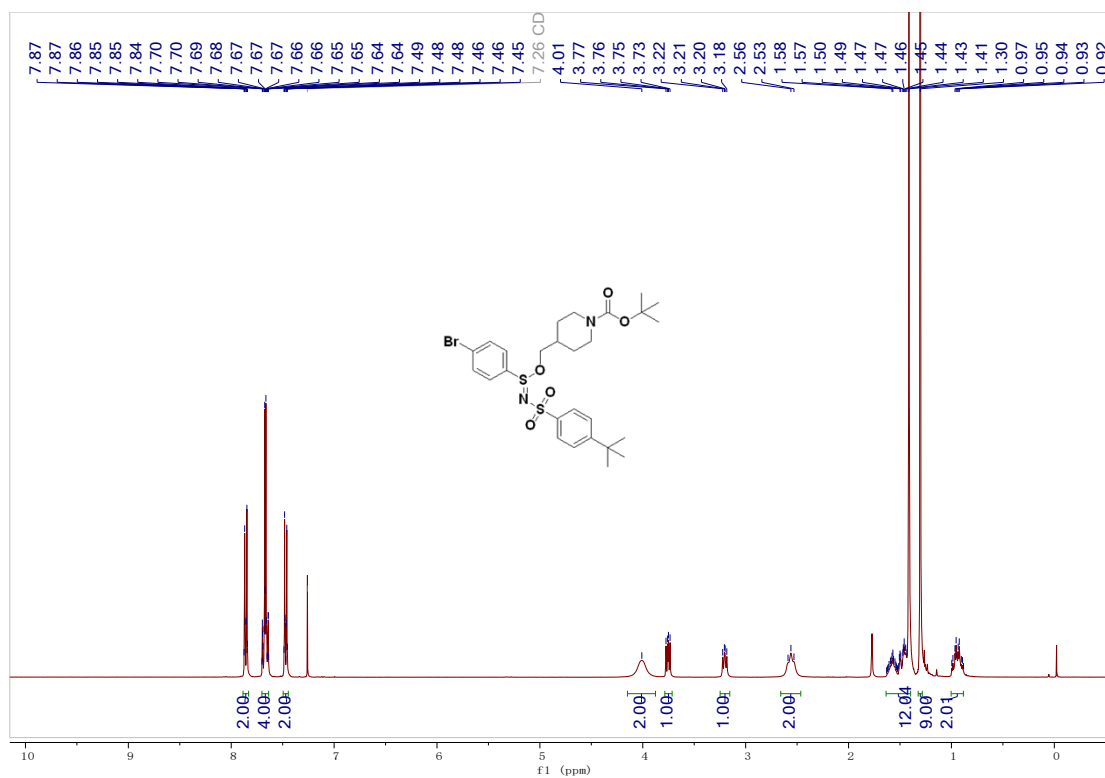

<sup>13</sup>C NMR (100 MHz, Chloroform-*d*) of compound **6g**

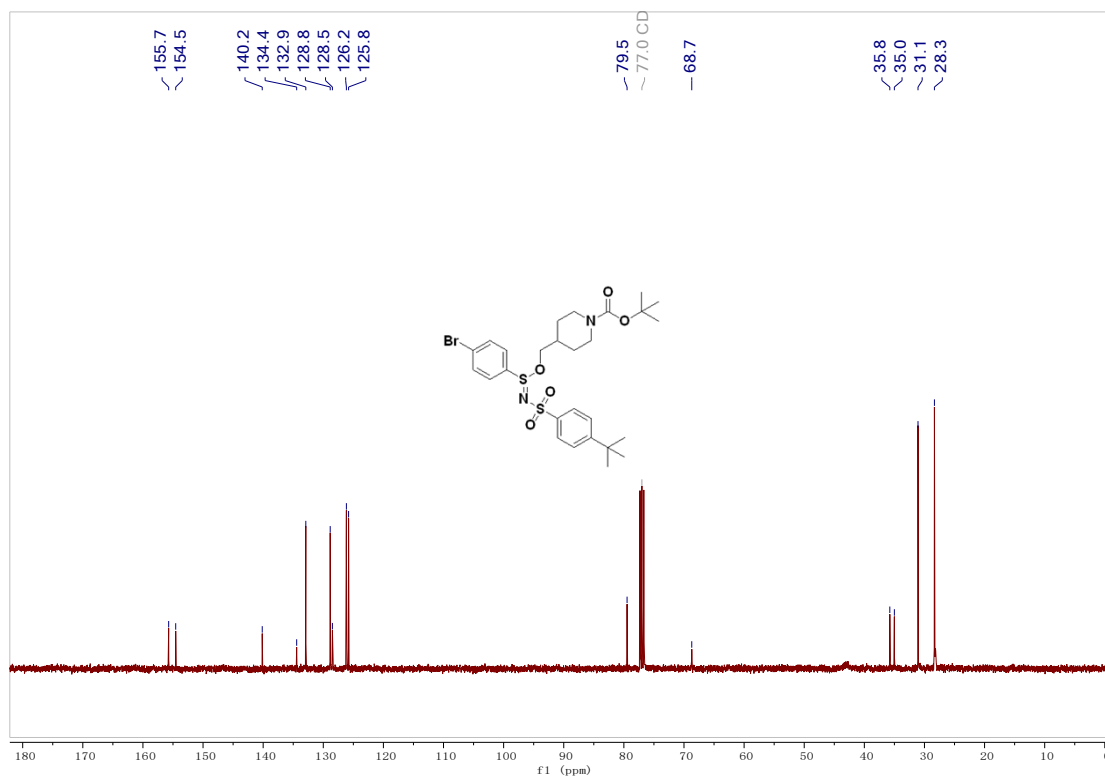

**<sup>1</sup>H NMR (400 MHz, Chloroform-*d*) of compound 6h**

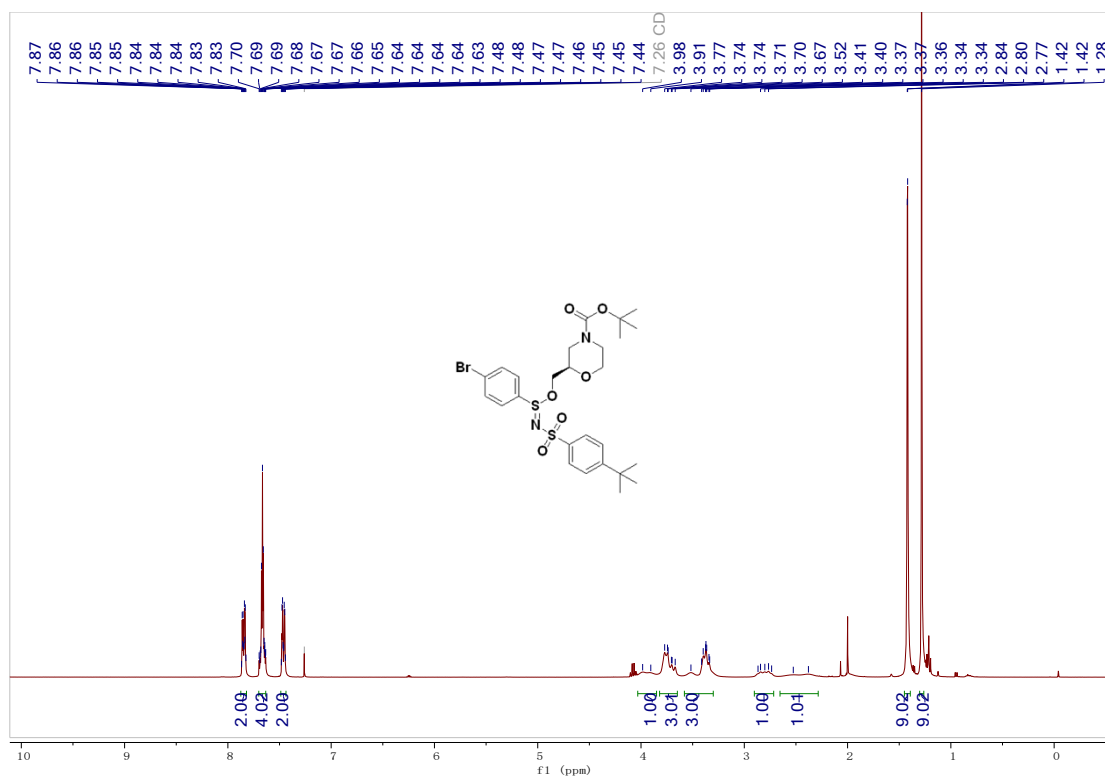

**<sup>13</sup>C NMR (100 MHz, Chloroform-*d*) of compound 6h**

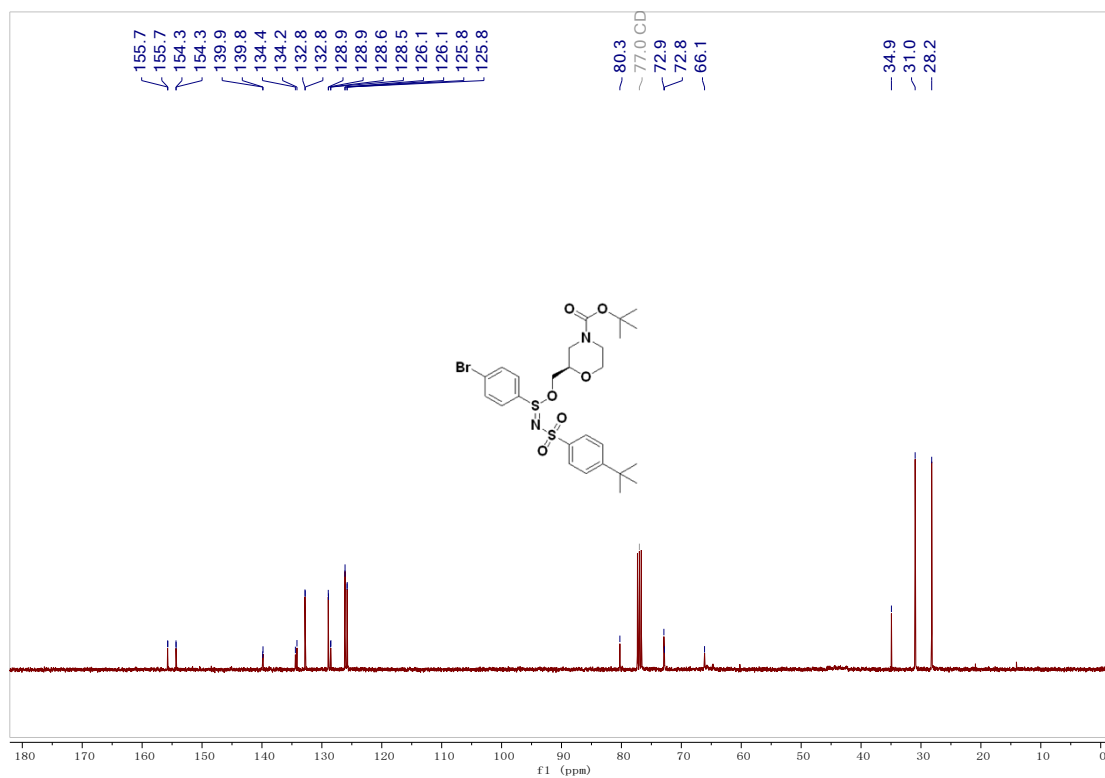

<sup>1</sup>H NMR (400 MHz, Chloroform-*d*) of compound **6i**

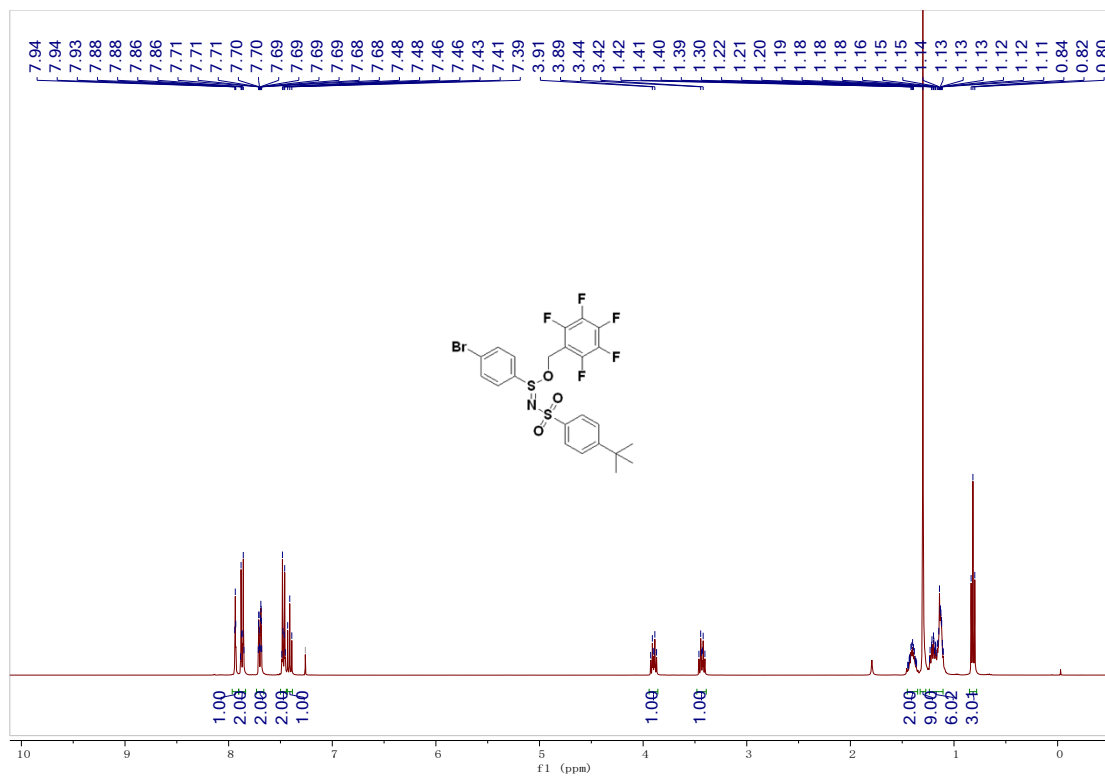

<sup>13</sup>C NMR (100 MHz, Chloroform-*d*) of compound **6i**

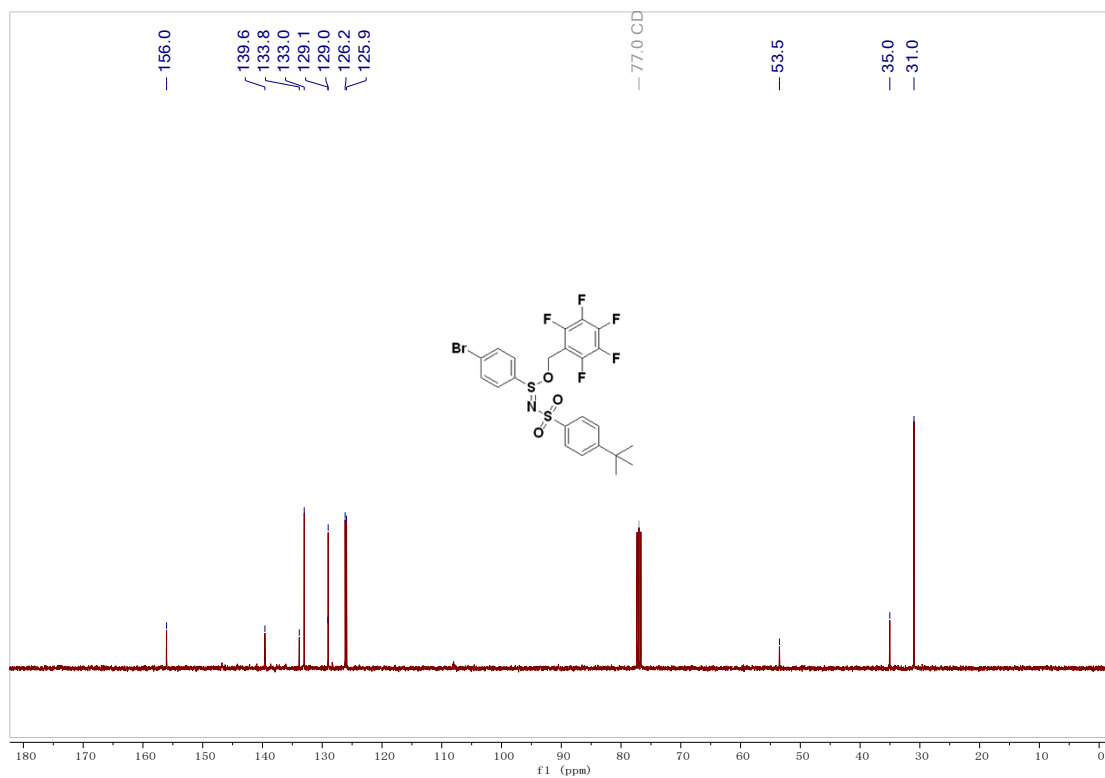

<sup>19</sup>F NMR (376 MHz, Chloroform-d) of compound **6i**

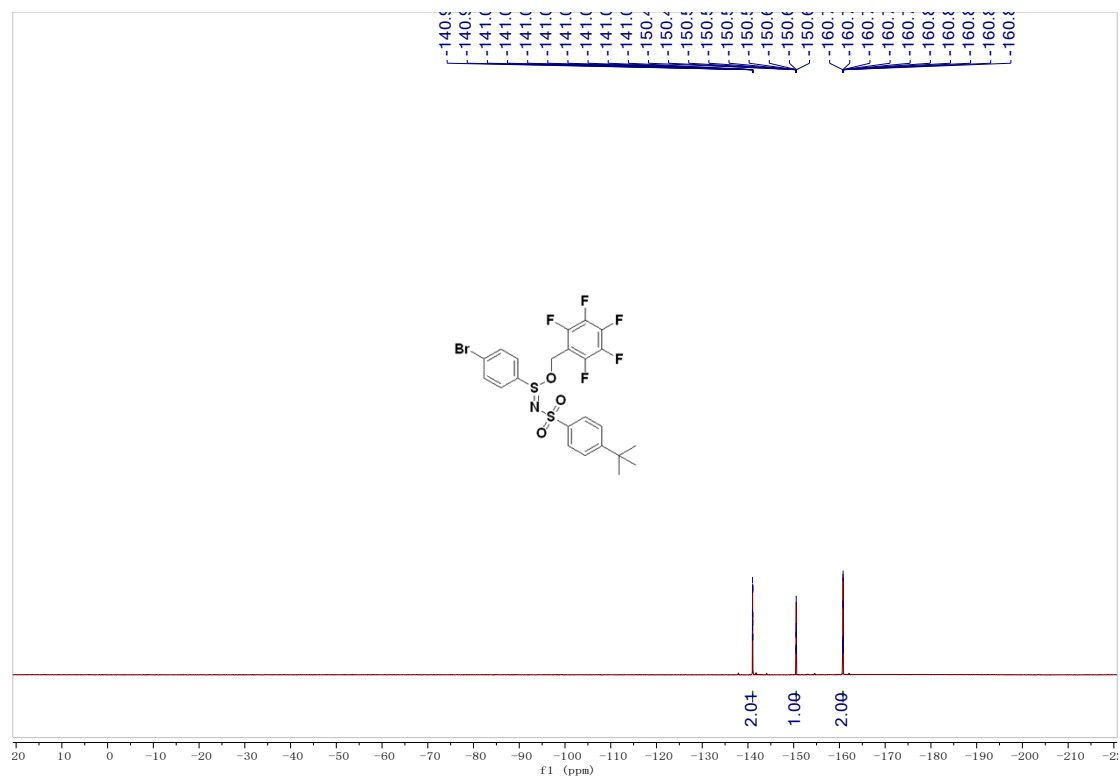

<sup>1</sup>H NMR (400 MHz, Chloroform-d) of compound **6j**

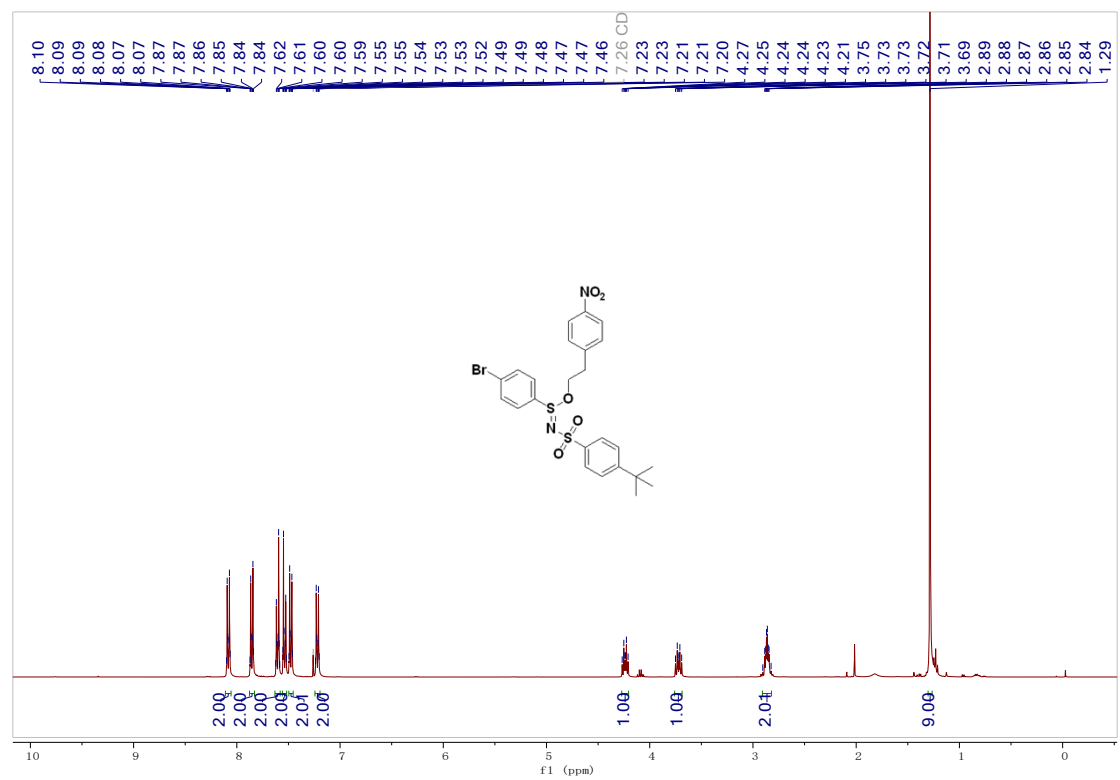

<sup>13</sup>C NMR (100 MHz, Chloroform-*d*) of compound **6j**

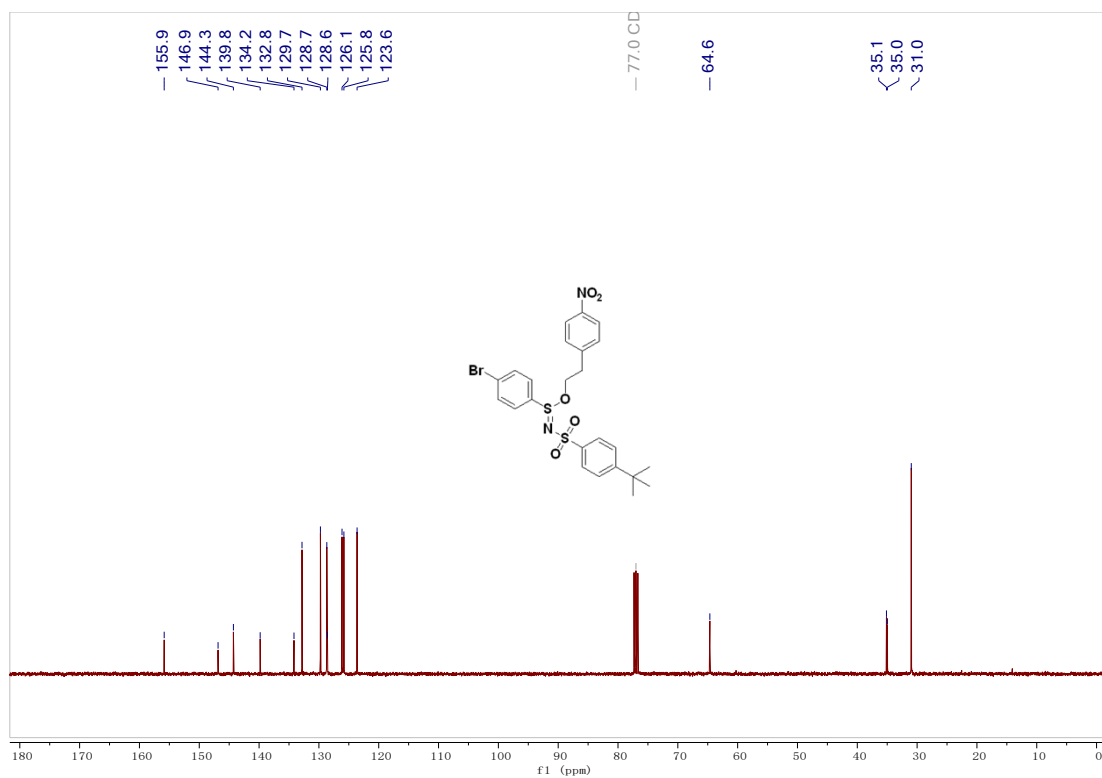

<sup>1</sup>H NMR (400 MHz, Chloroform-*d*) of compound **6k**

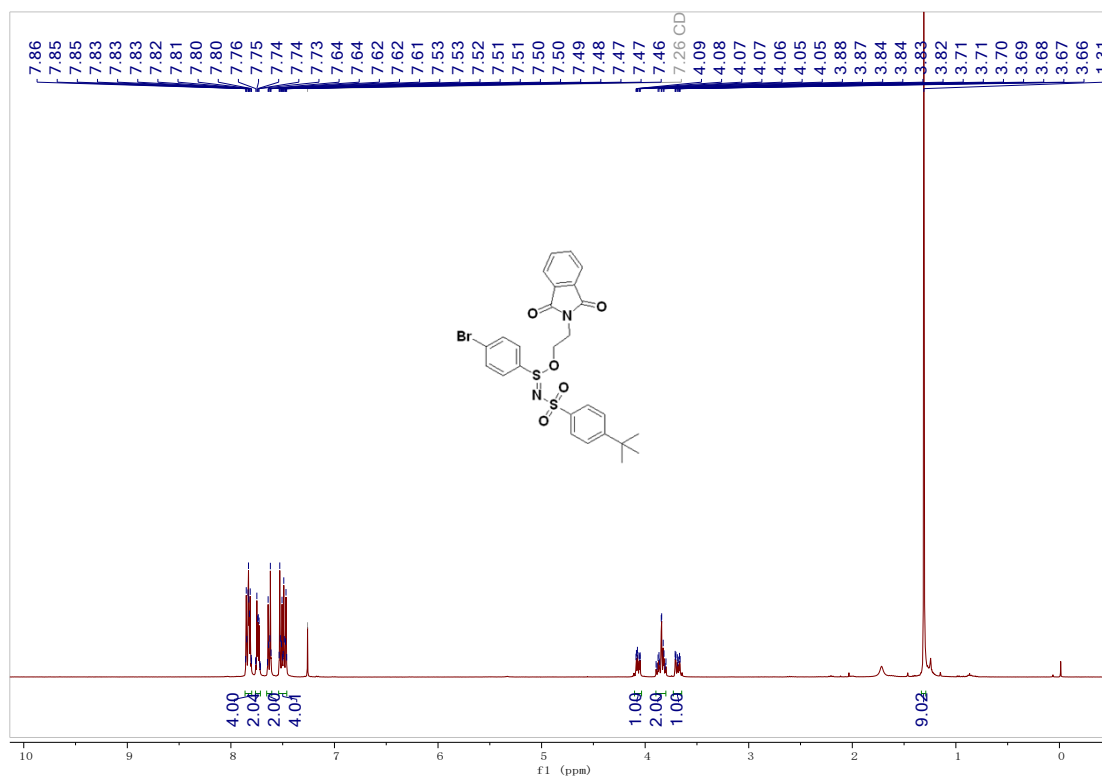

<sup>13</sup>C NMR (100 MHz, Chloroform-*d*) of compound **6k**

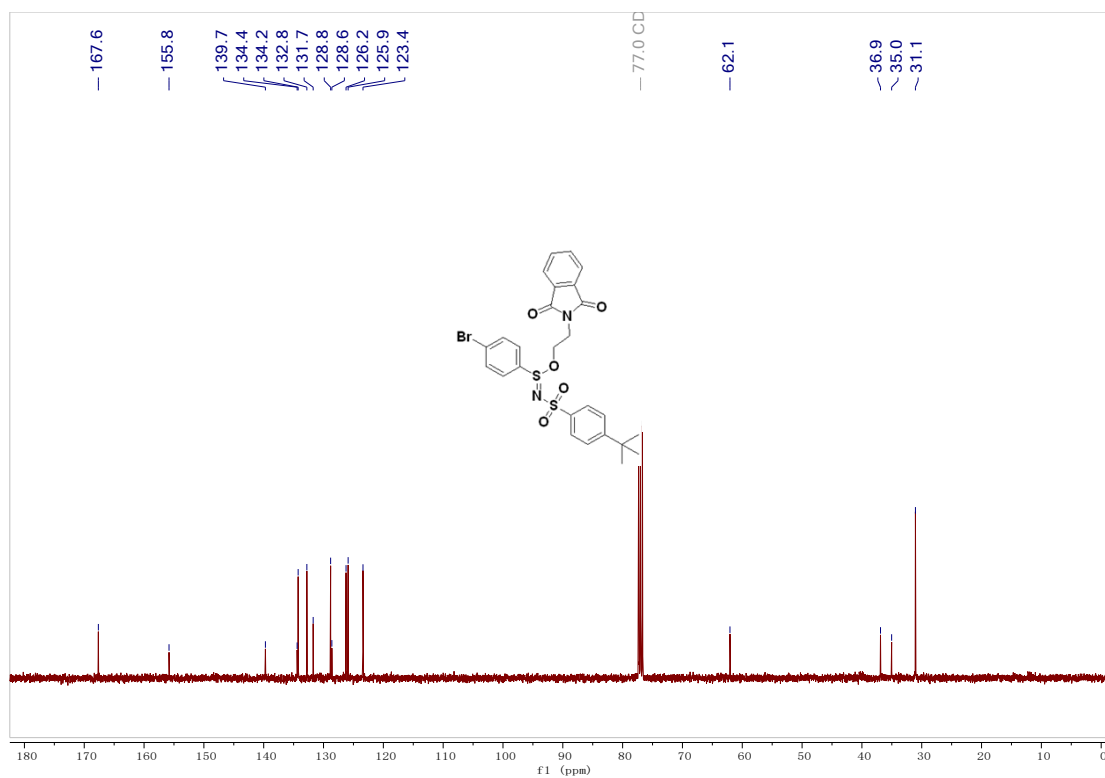

<sup>1</sup>H NMR (400 MHz, Chloroform-*d*) of compound **6l**

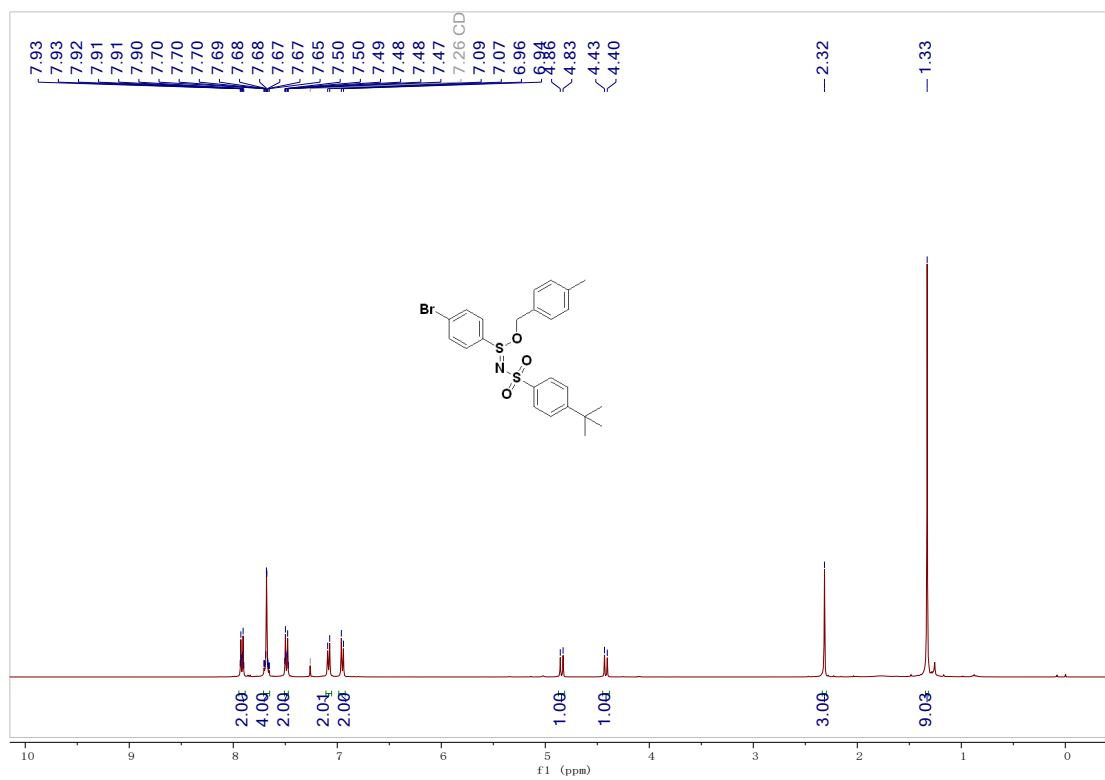

**<sup>13</sup>C NMR (100 MHz, Chloroform-*d*) of compound 6l**

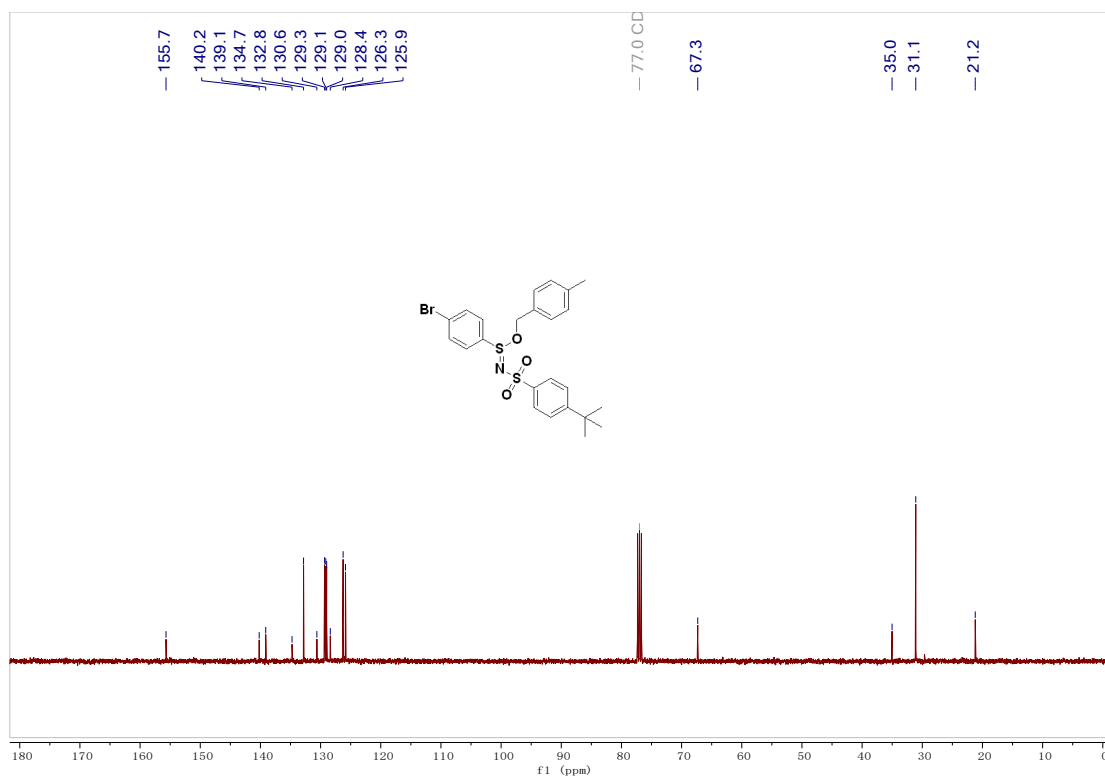

**<sup>1</sup>H NMR (400 MHz, Chloroform-*d*) of compound 6m**

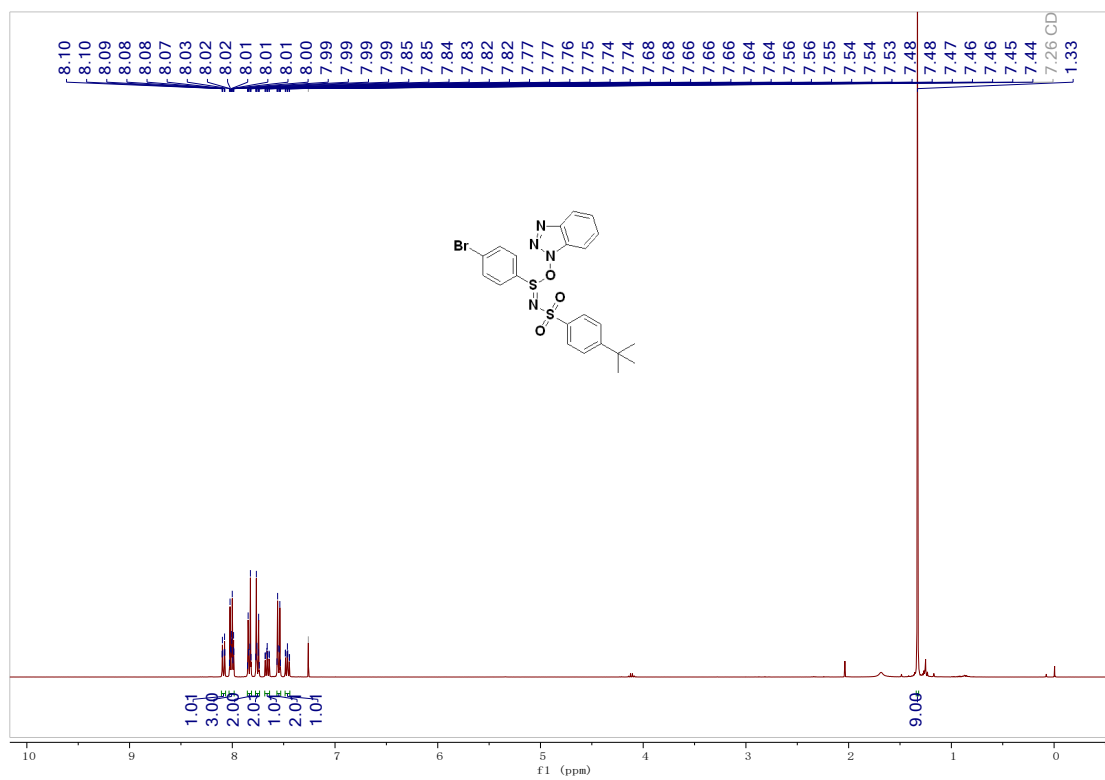





<sup>13</sup>C NMR (100 MHz, Chloroform-*d*) of compound **6n**

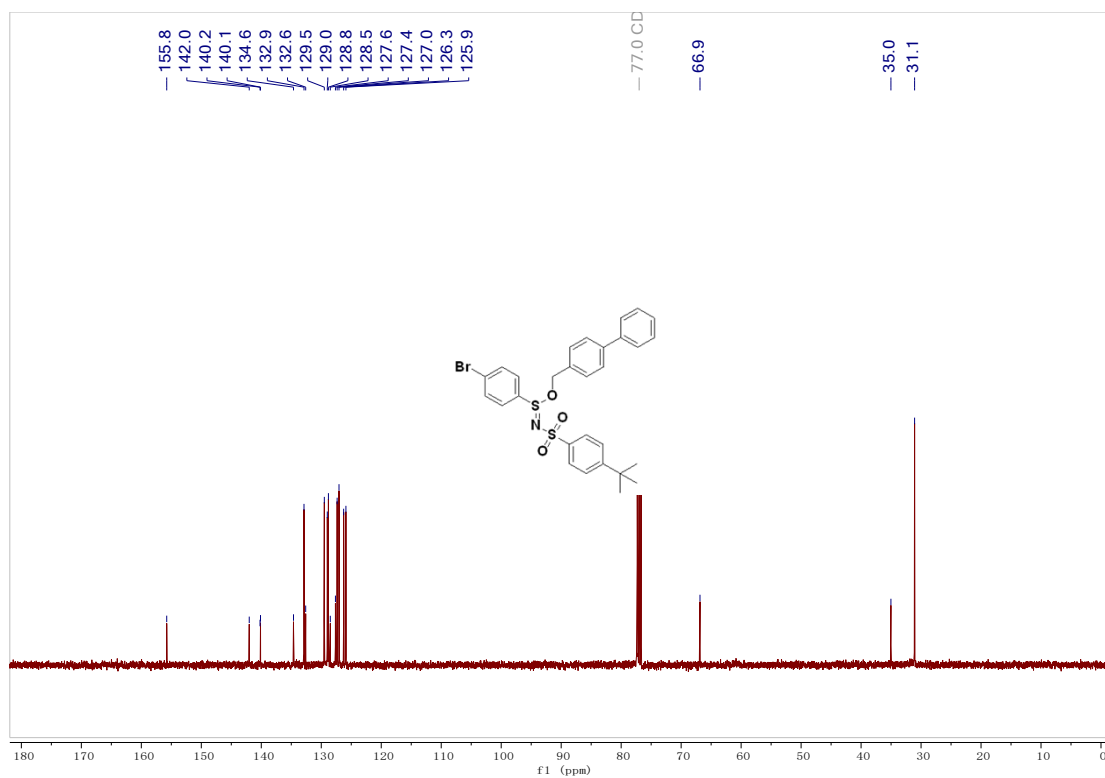

<sup>1</sup>H NMR (400 MHz, Chloroform-*d*) of compound **6o**

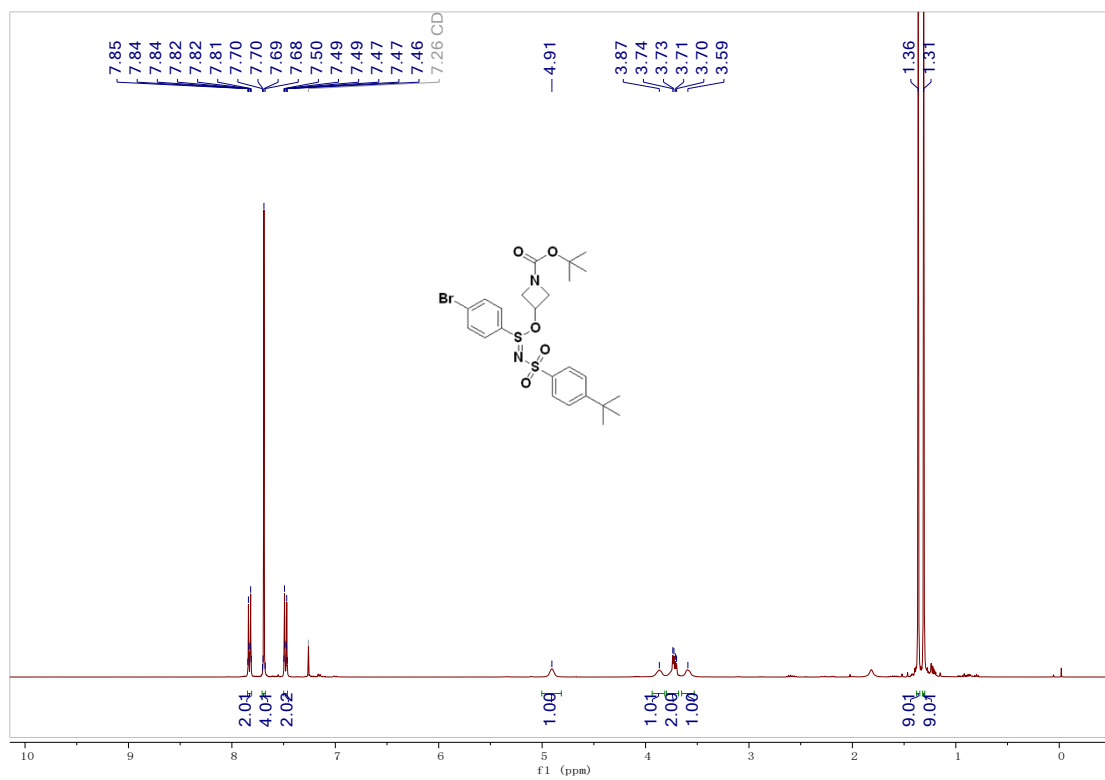

<sup>13</sup>C NMR (100 MHz, Chloroform-*d*) of compound **6o**

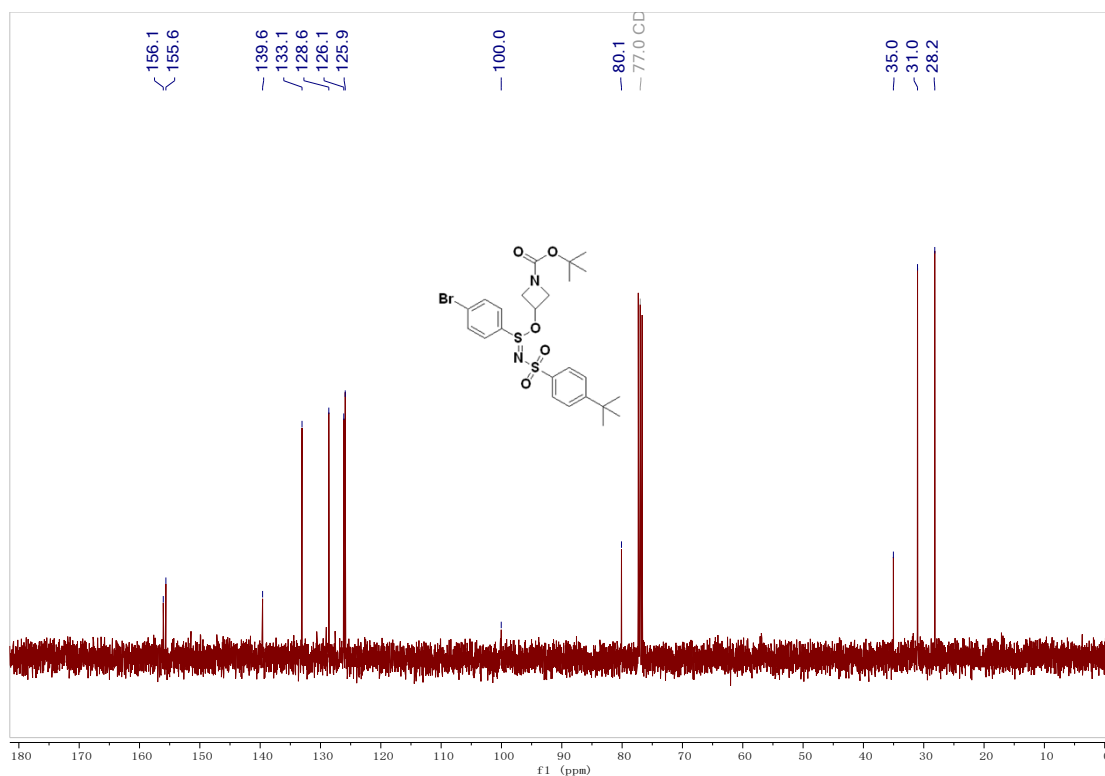

<sup>1</sup>H NMR (400 MHz, Chloroform-*d*) of compound **6p**

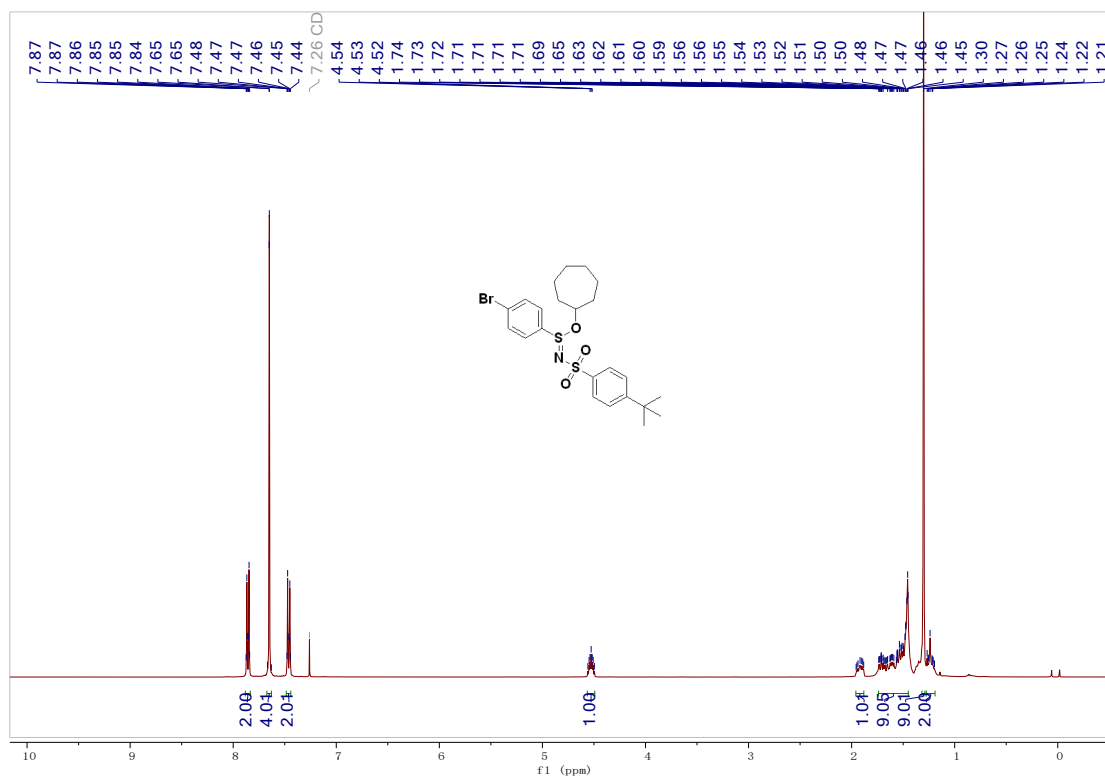

<sup>13</sup>C NMR (100 MHz, Chloroform-*d*) of compound **6p**

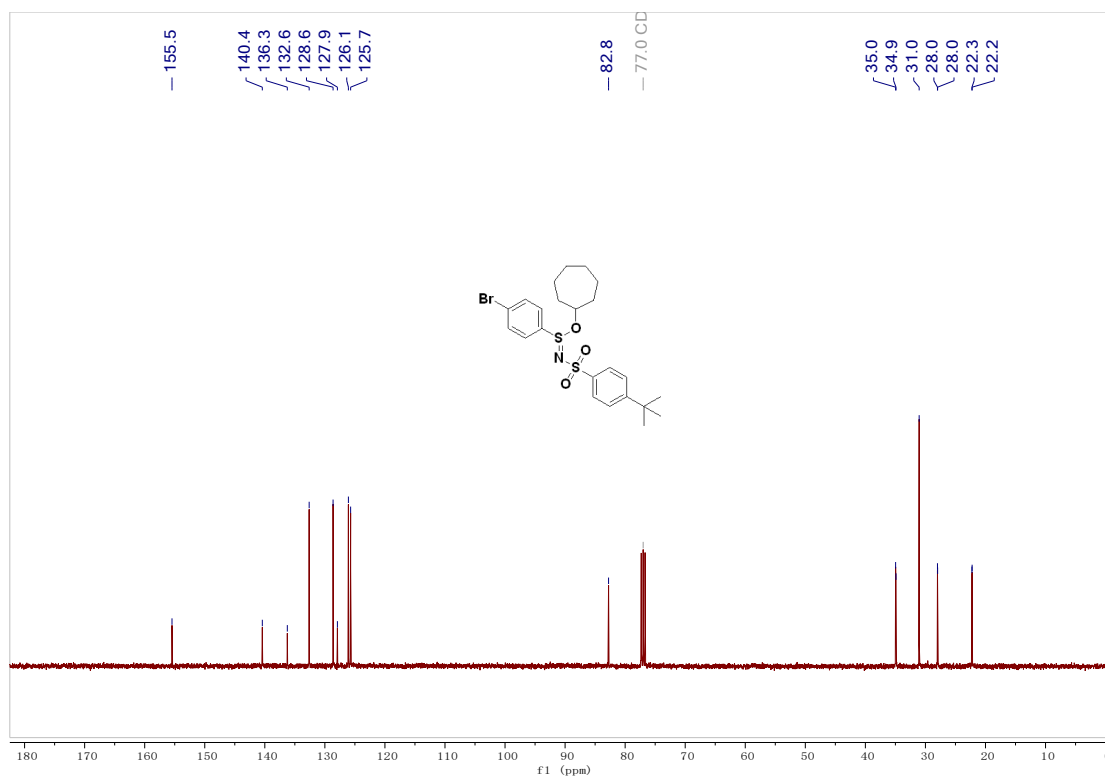

<sup>1</sup>H NMR (400 MHz, Chloroform-*d*) of compound **6q**

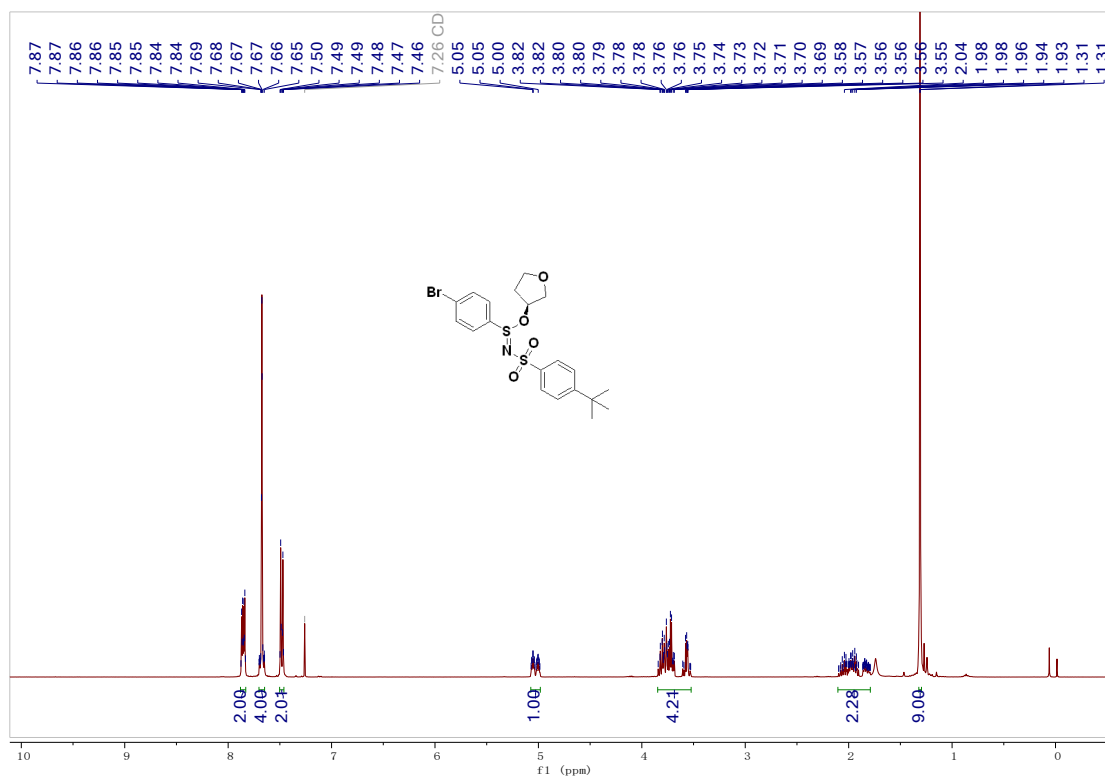

<sup>13</sup>C NMR (100 MHz, Chloroform-*d*) of compound **6q**

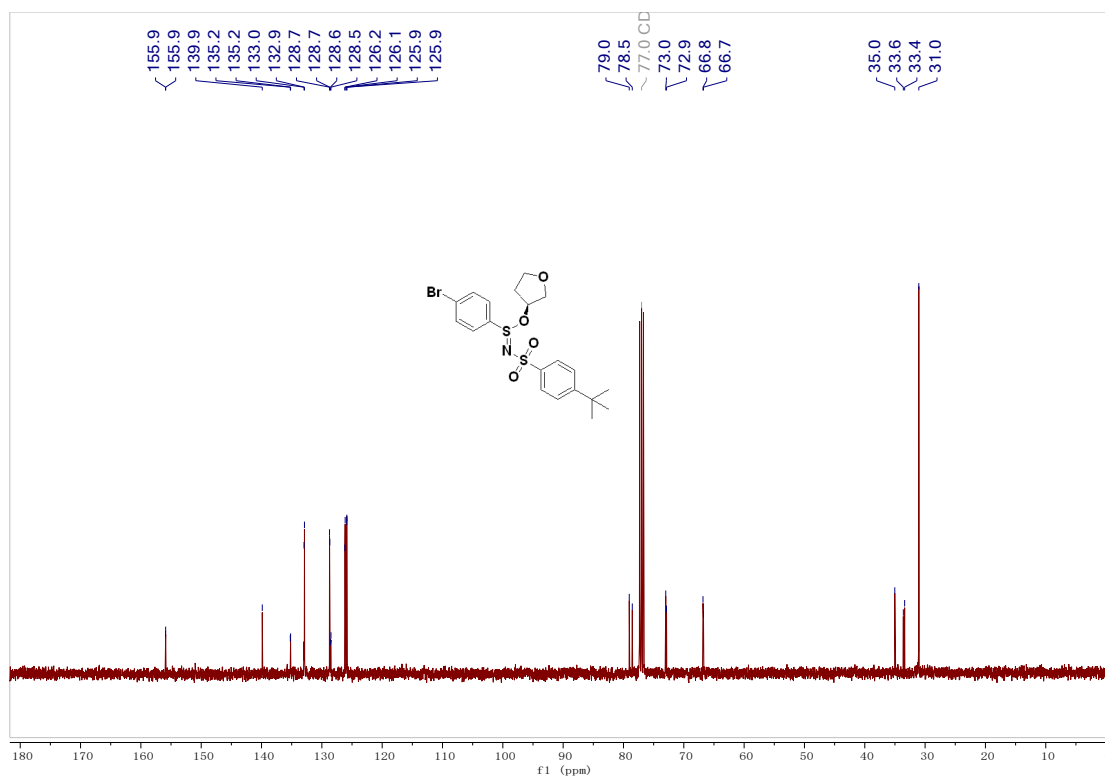

<sup>1</sup>H NMR (400 MHz, Chloroform-*d*) of compound **6r**

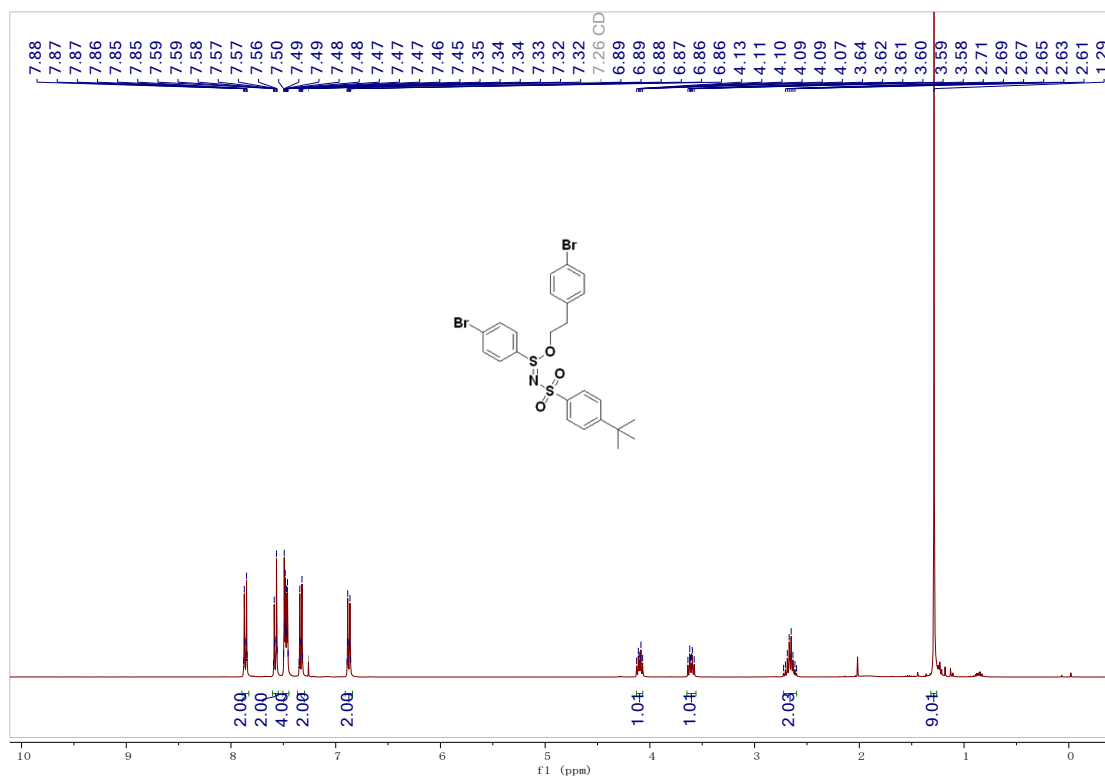

**<sup>13</sup>C NMR (100 MHz, Chloroform-*d*) of compound 6r**

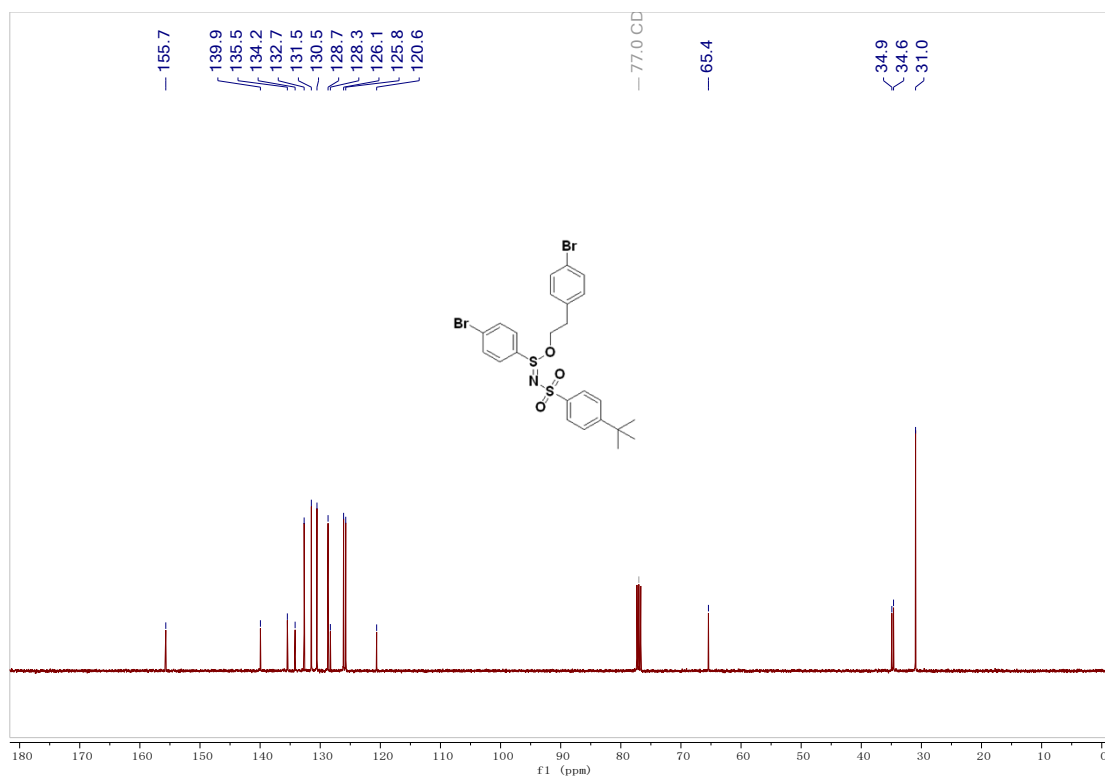

**<sup>1</sup>H NMR (400 MHz, Chloroform-*d*) of compound 6s**

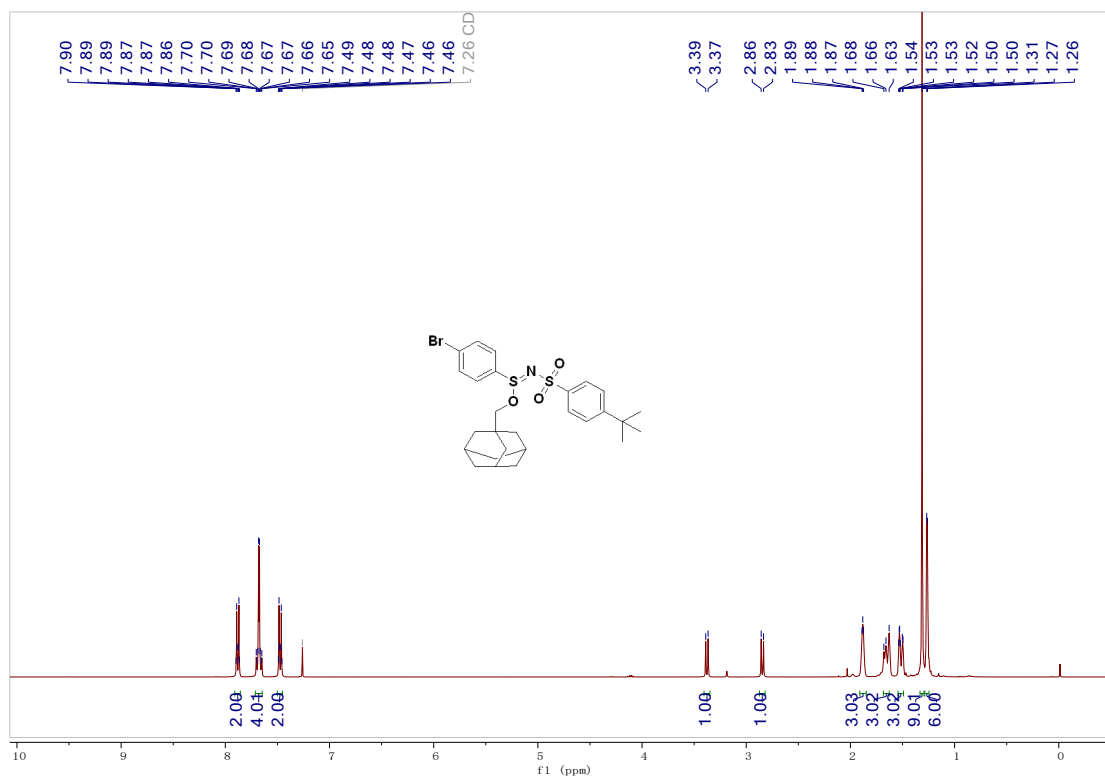

<sup>13</sup>C NMR (100 MHz, Chloroform-*d*) of compound **6s**

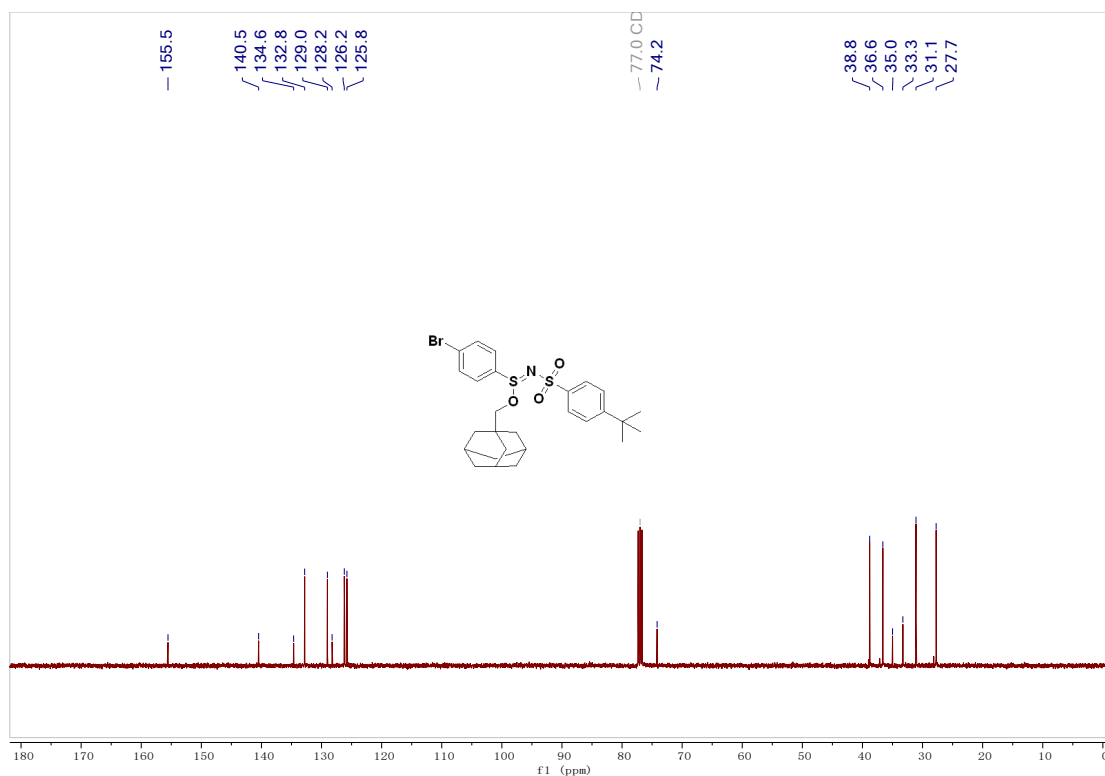

<sup>1</sup>H NMR (400 MHz, Chloroform-*d*) of compound **6t**

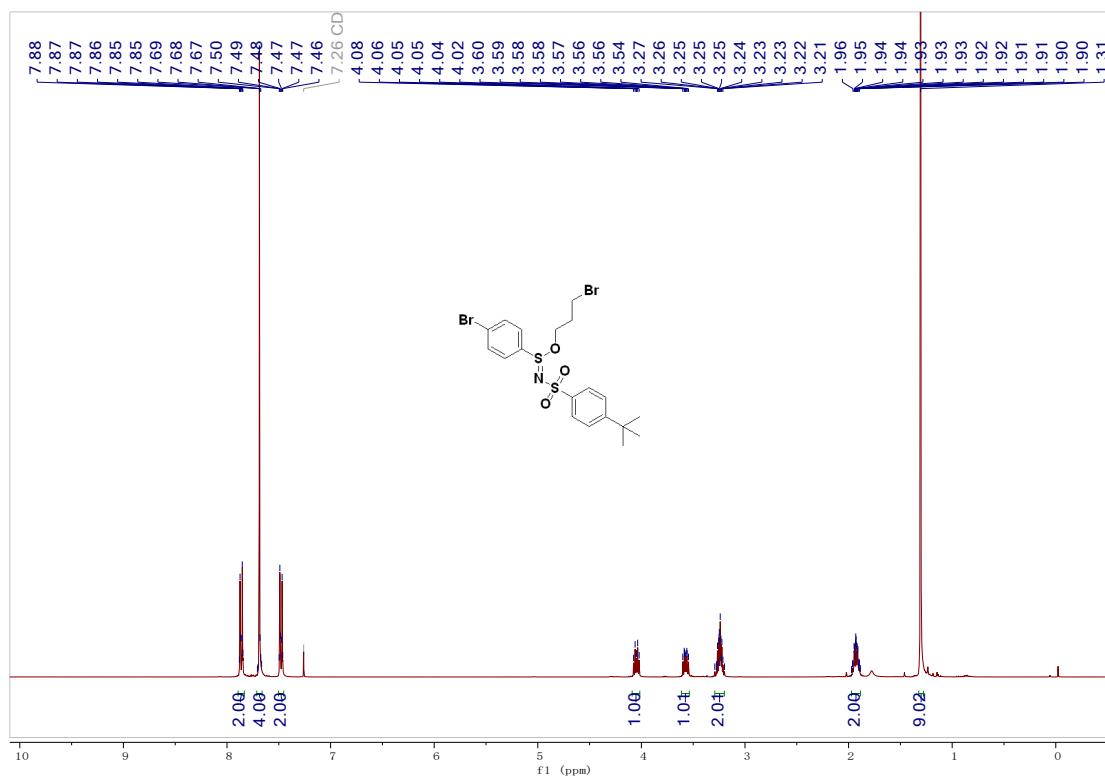

<sup>13</sup>C NMR (100 MHz, Chloroform-*d*) of compound **6t**

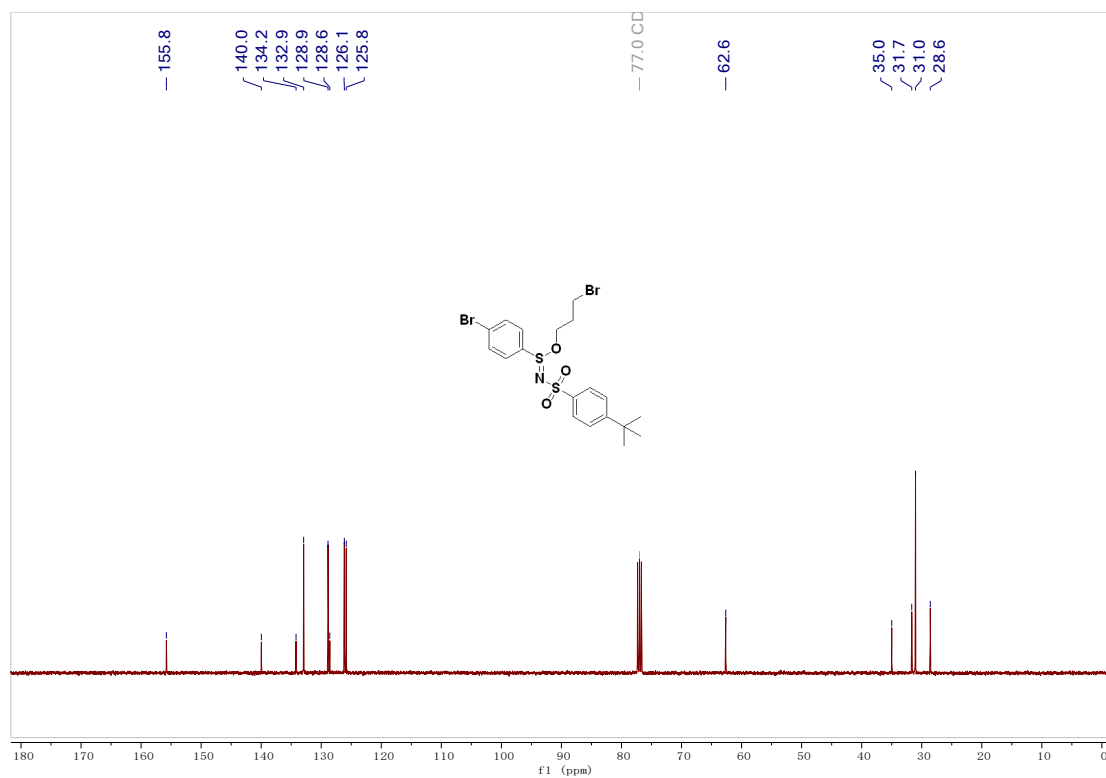

<sup>1</sup>H NMR (400 MHz, Chloroform-*d*) of compound **6u**

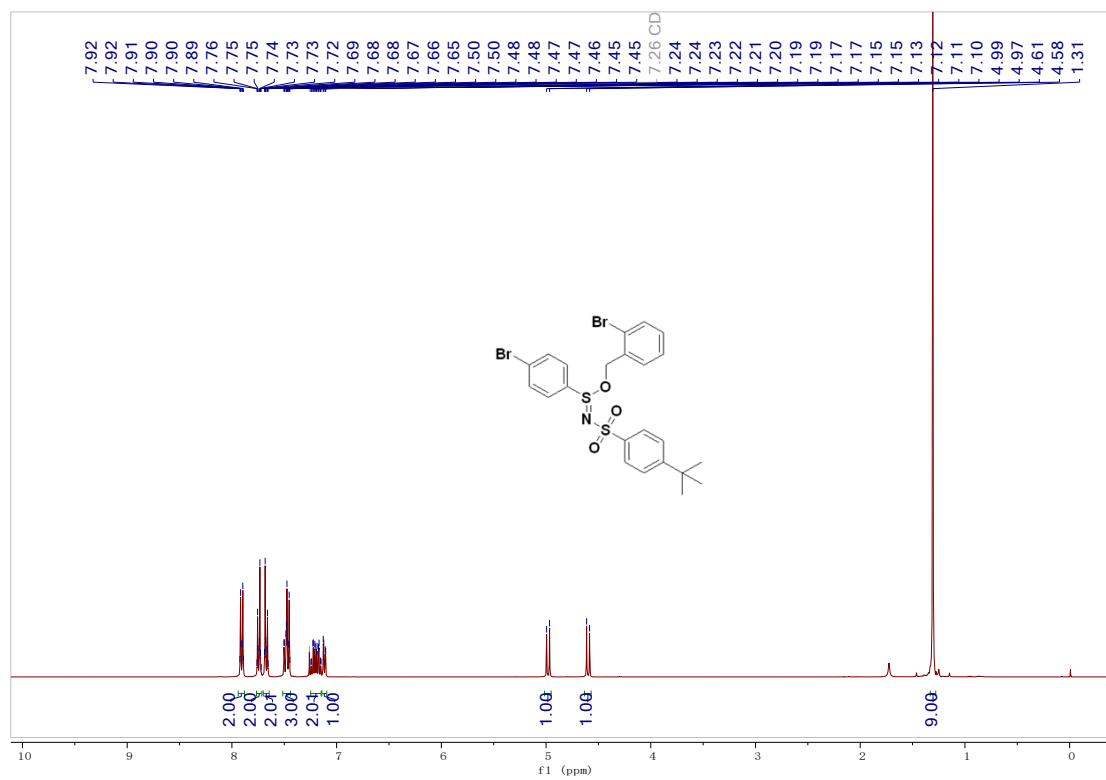



<sup>13</sup>C NMR (100 MHz, Chloroform-*d*) of compound **6u**

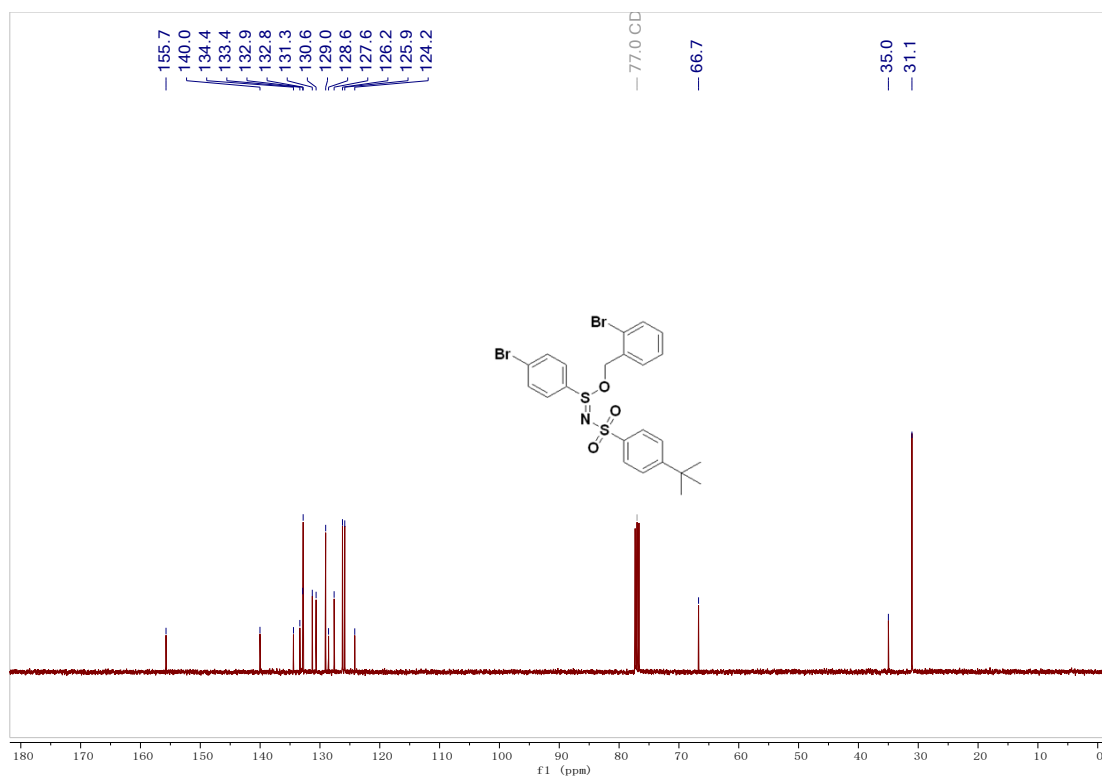

<sup>1</sup>H NMR (400 MHz, Chloroform-*d*) of compound **6v**

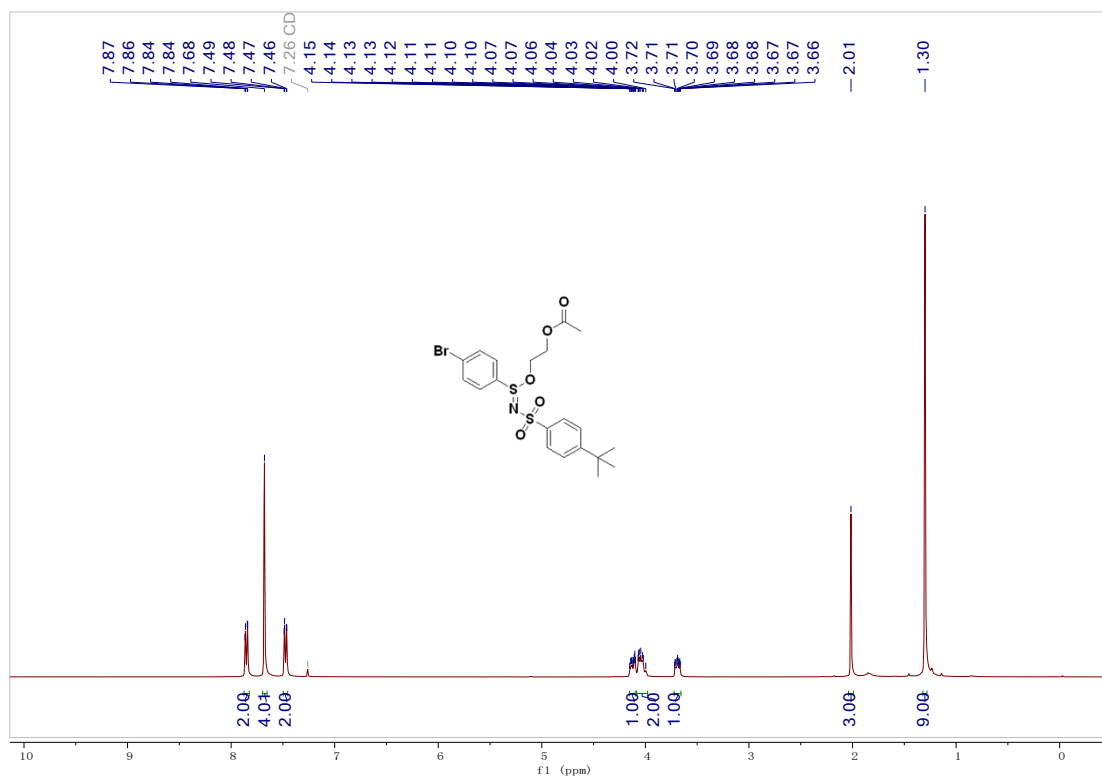

<sup>13</sup>C NMR (100 MHz, Chloroform-*d*) of compound **6v**

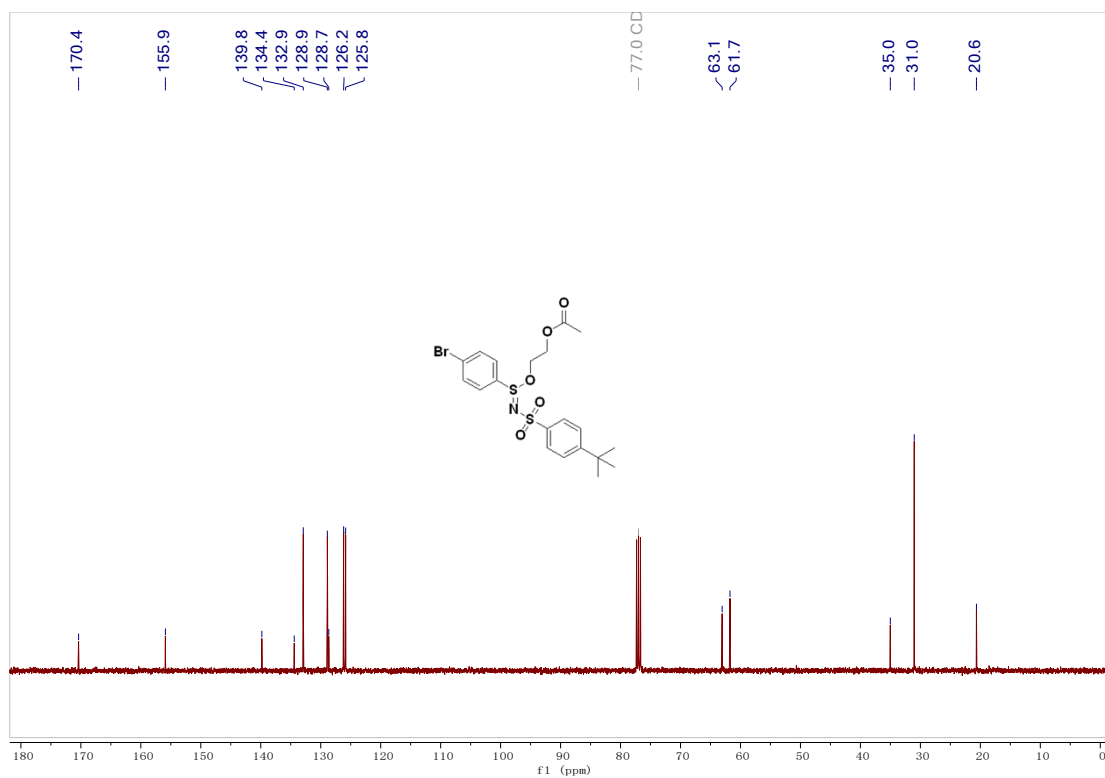

<sup>1</sup>H NMR (400 MHz, Chloroform-*d*) of compound **6w**

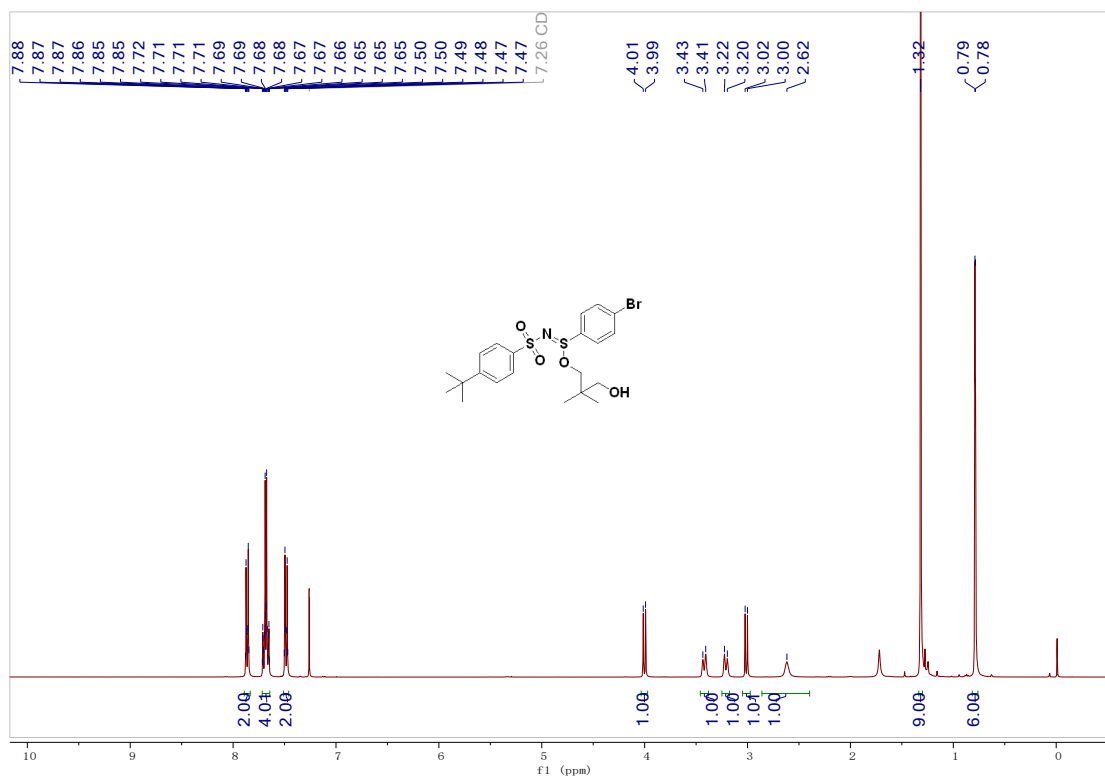

<sup>13</sup>C NMR (100 MHz, Chloroform-*d*) of compound **6w**

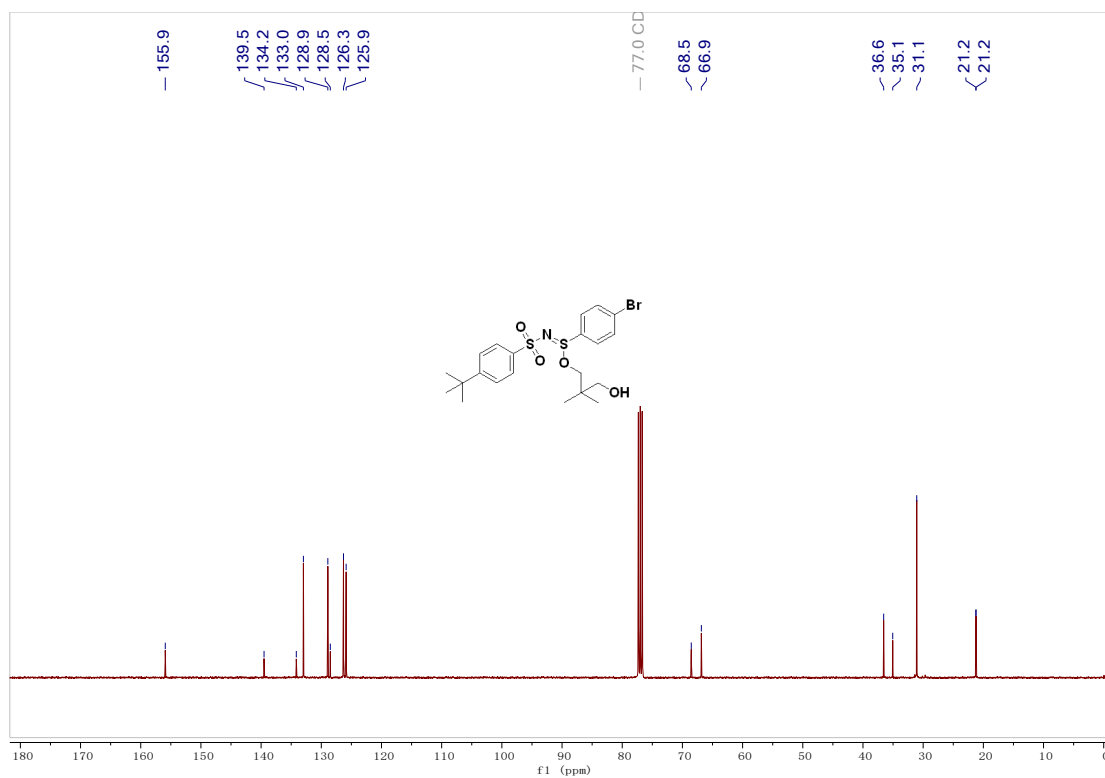

<sup>1</sup>H NMR (400 MHz, Chloroform-*d*) of compound **6x**

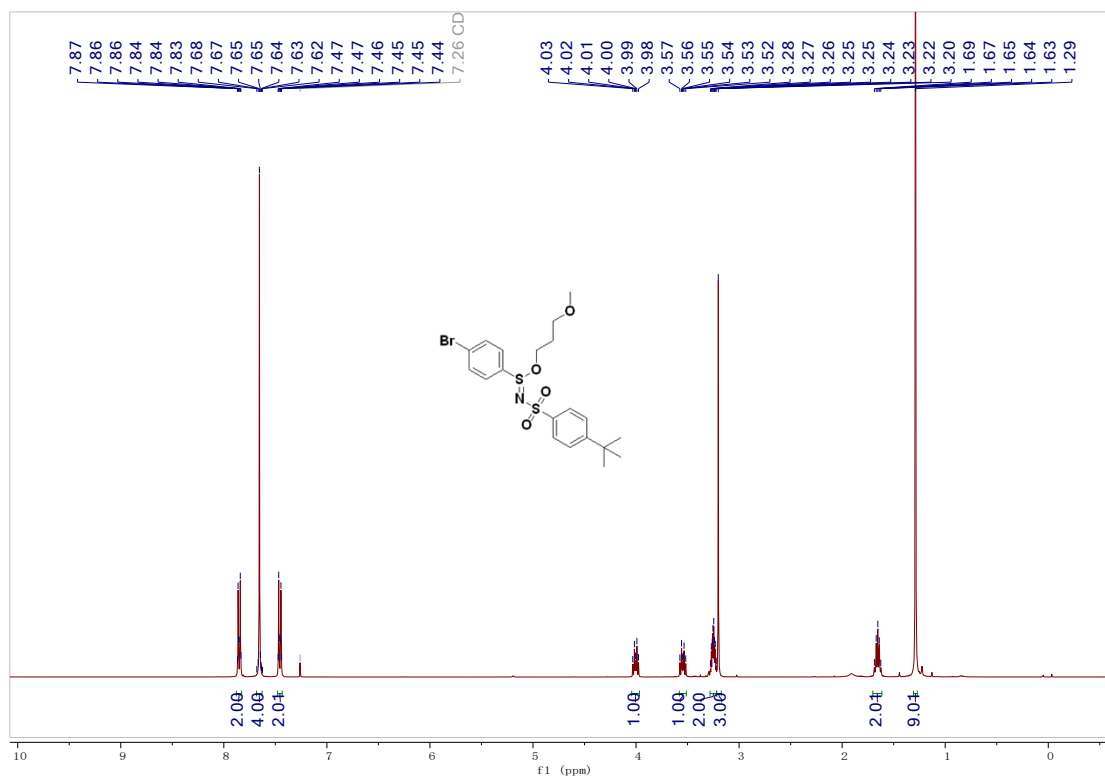

<sup>13</sup>C NMR (100 MHz, Chloroform-*d*) of compound **6x**

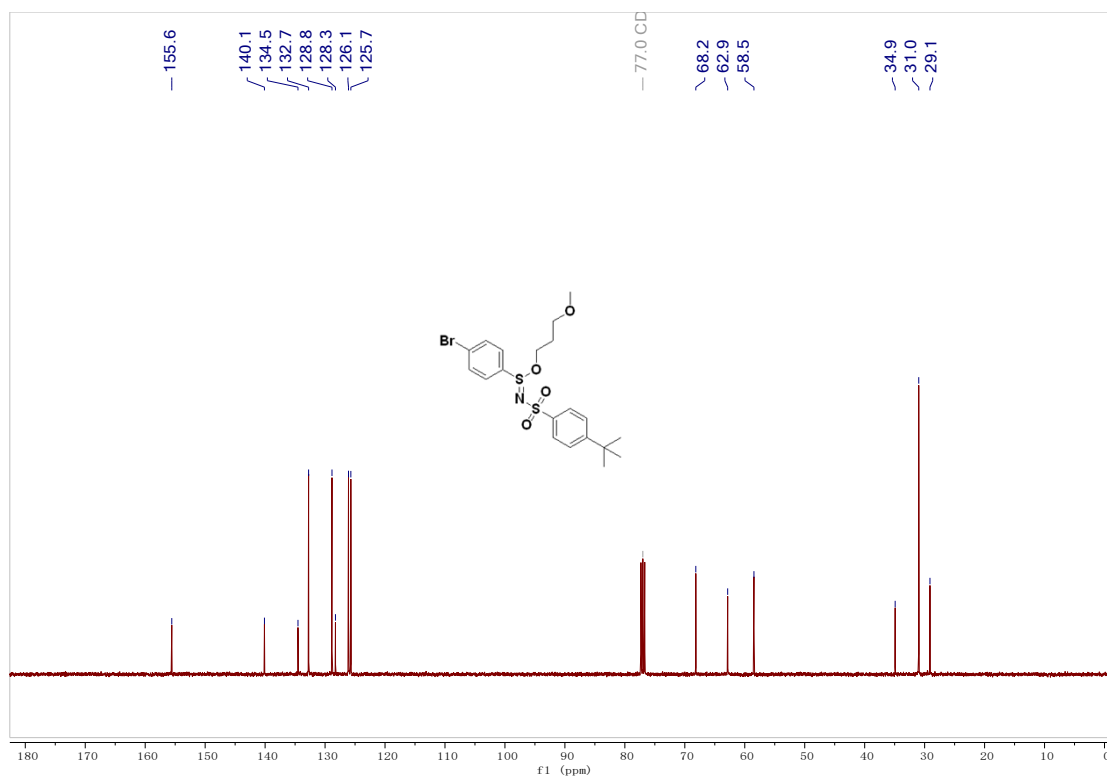

<sup>1</sup>H NMR (400 MHz, Chloroform-*d*) of compound **6y**

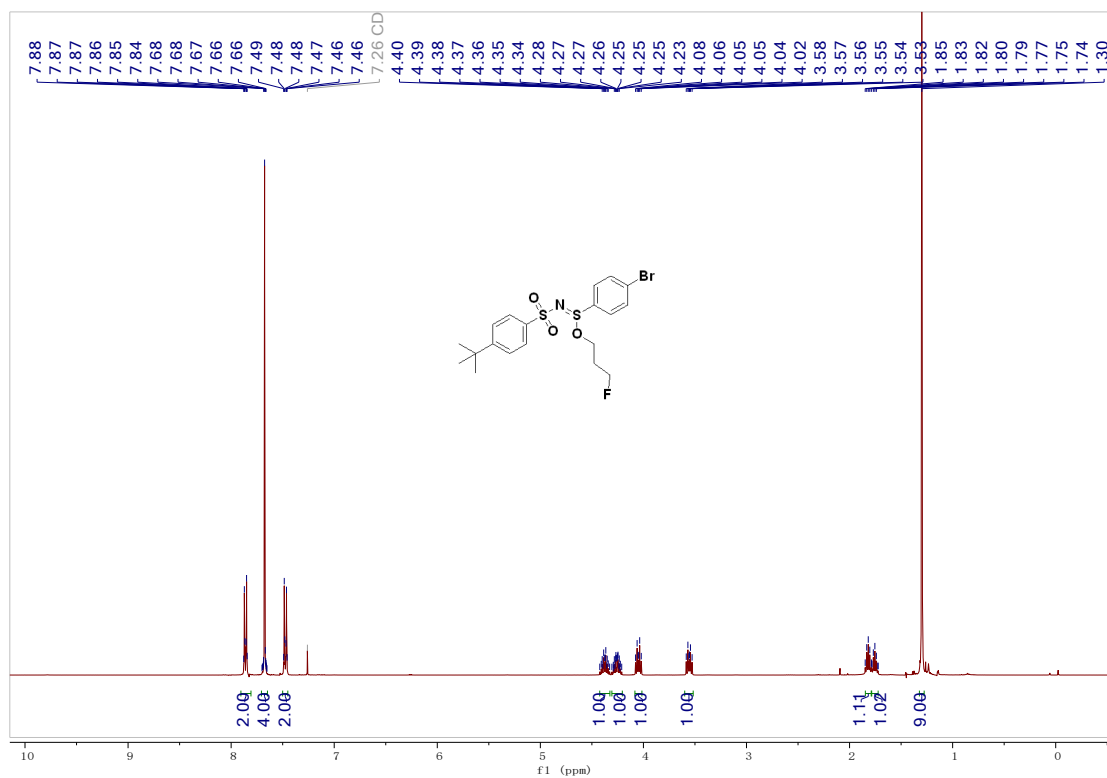

**<sup>13</sup>C NMR (100 MHz, Chloroform-*d*) of compound 6y**

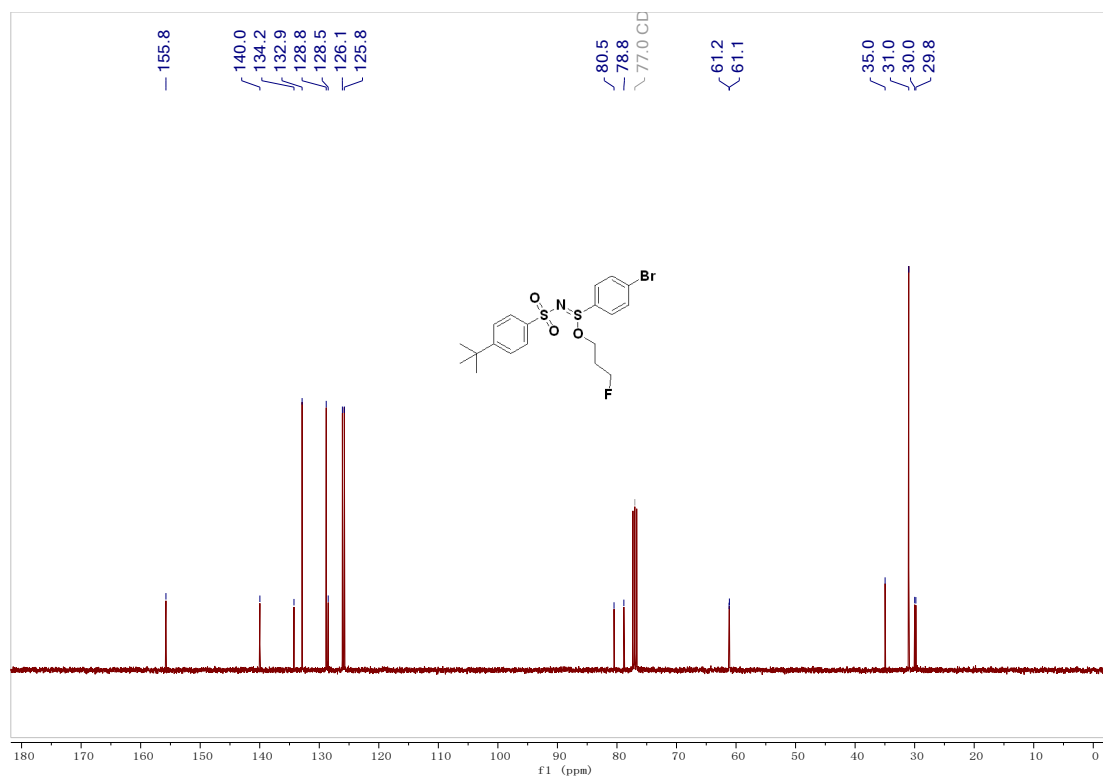

**<sup>19</sup>F NMR (376 MHz, Chloroform-*d*) of compound 6y**

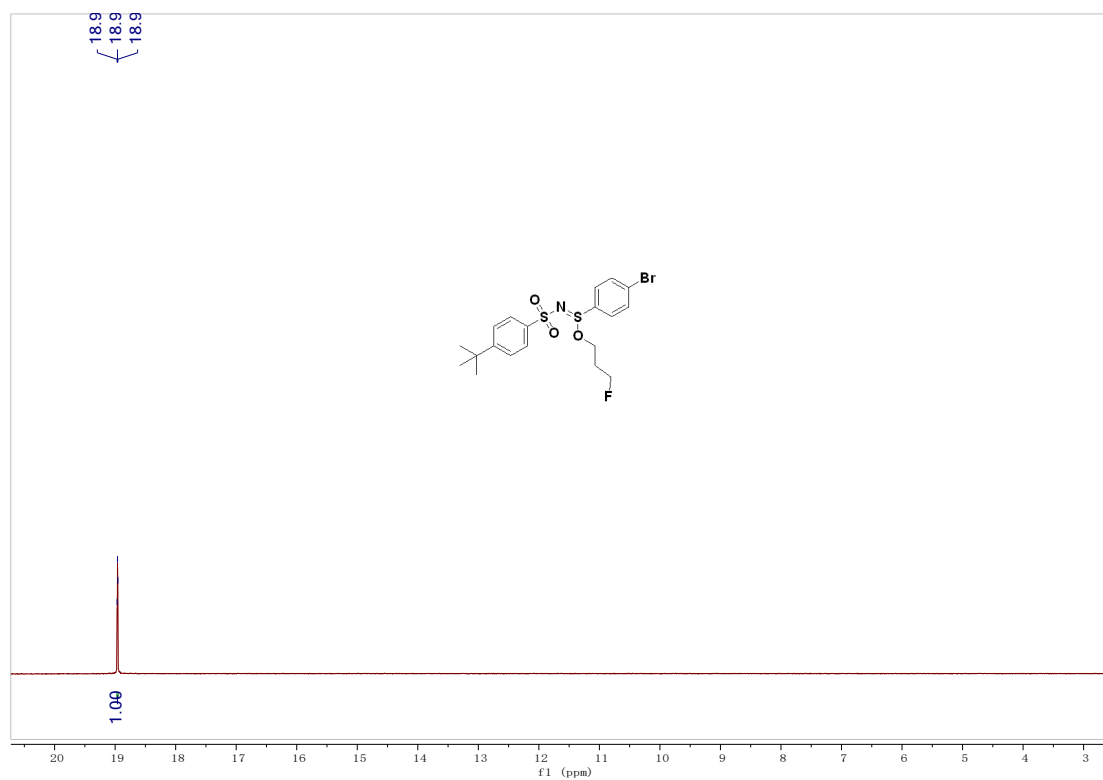

**<sup>1</sup>H NMR (400 MHz, Chloroform-*d*) of compound 6z**

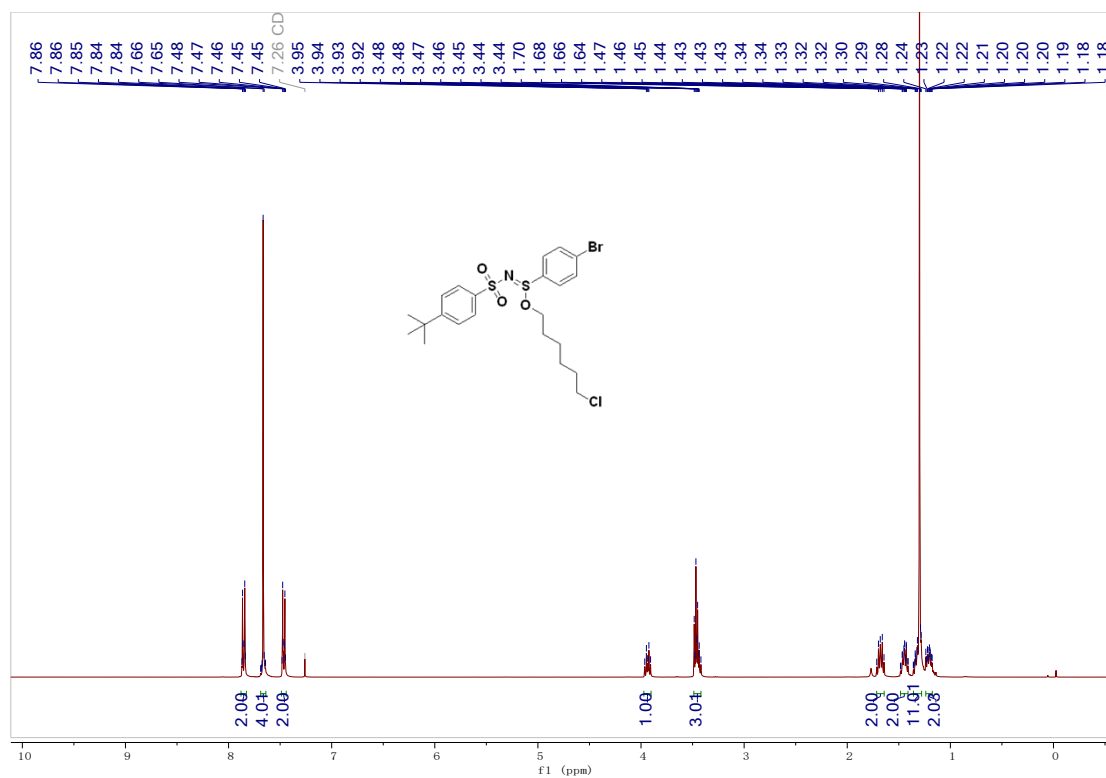

**<sup>13</sup>C NMR (100 MHz, Chloroform-*d*) of compound 6z**

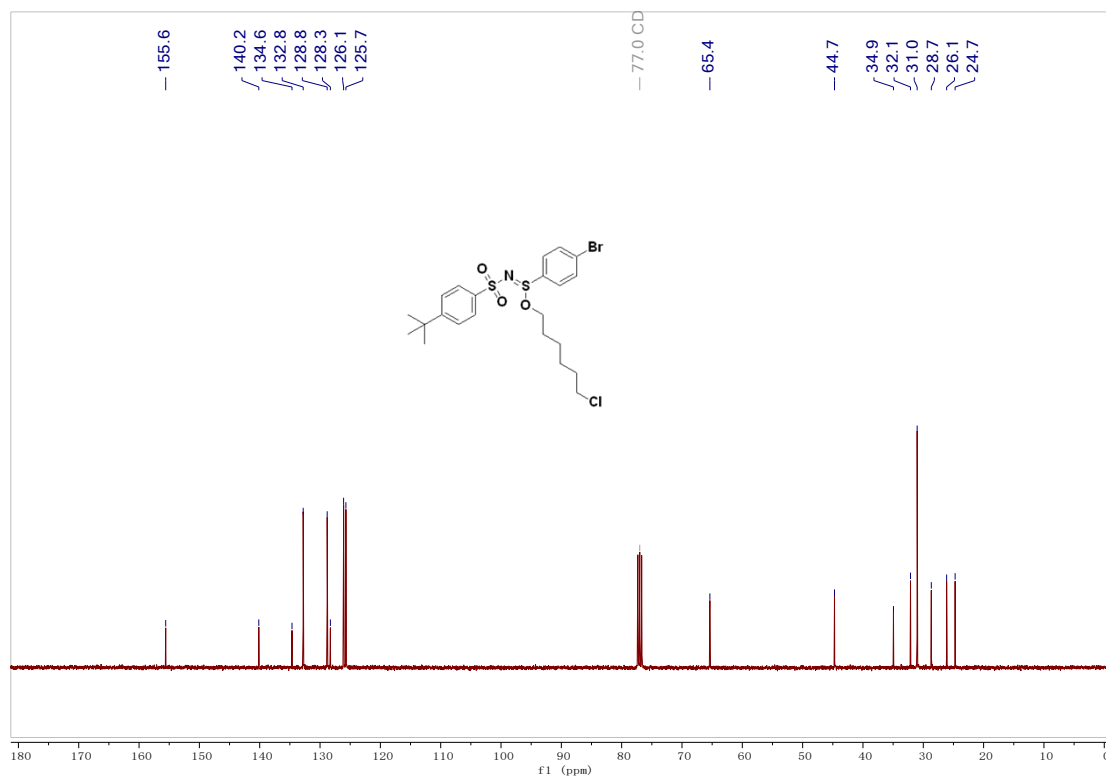

**<sup>1</sup>H NMR (400 MHz, Chloroform-*d*) of compound 6aa**

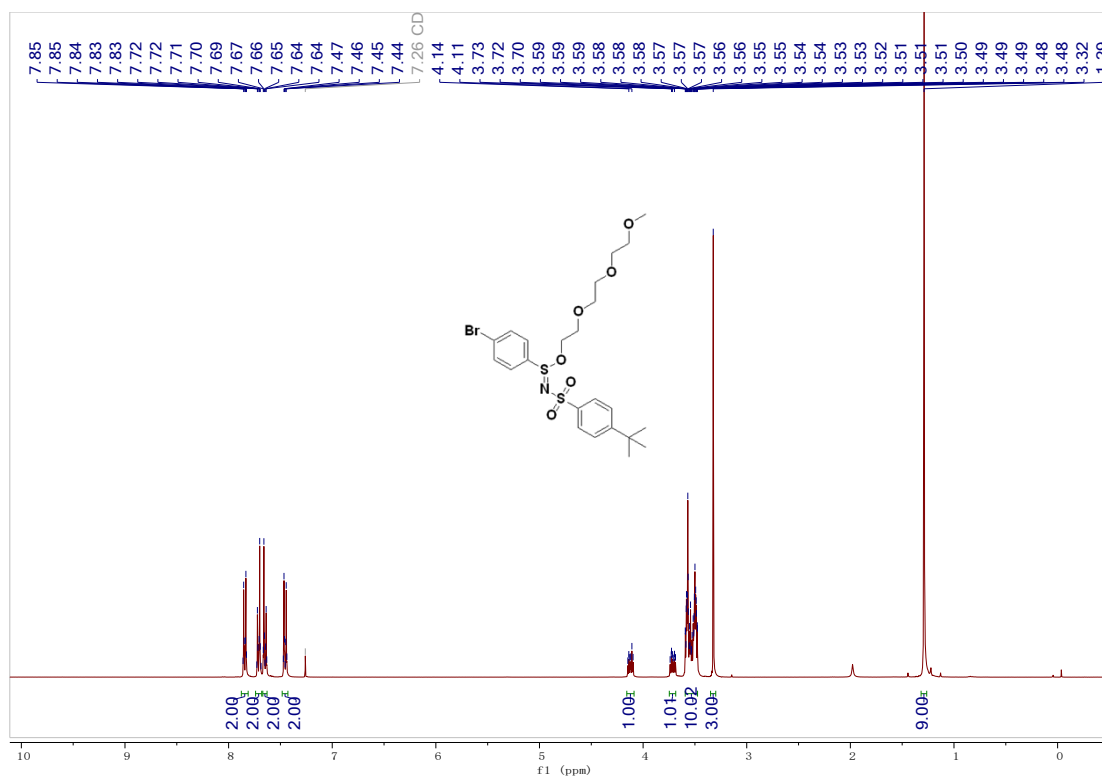

**<sup>13</sup>C NMR (100 MHz, Chloroform-*d*) of compound 6aa**

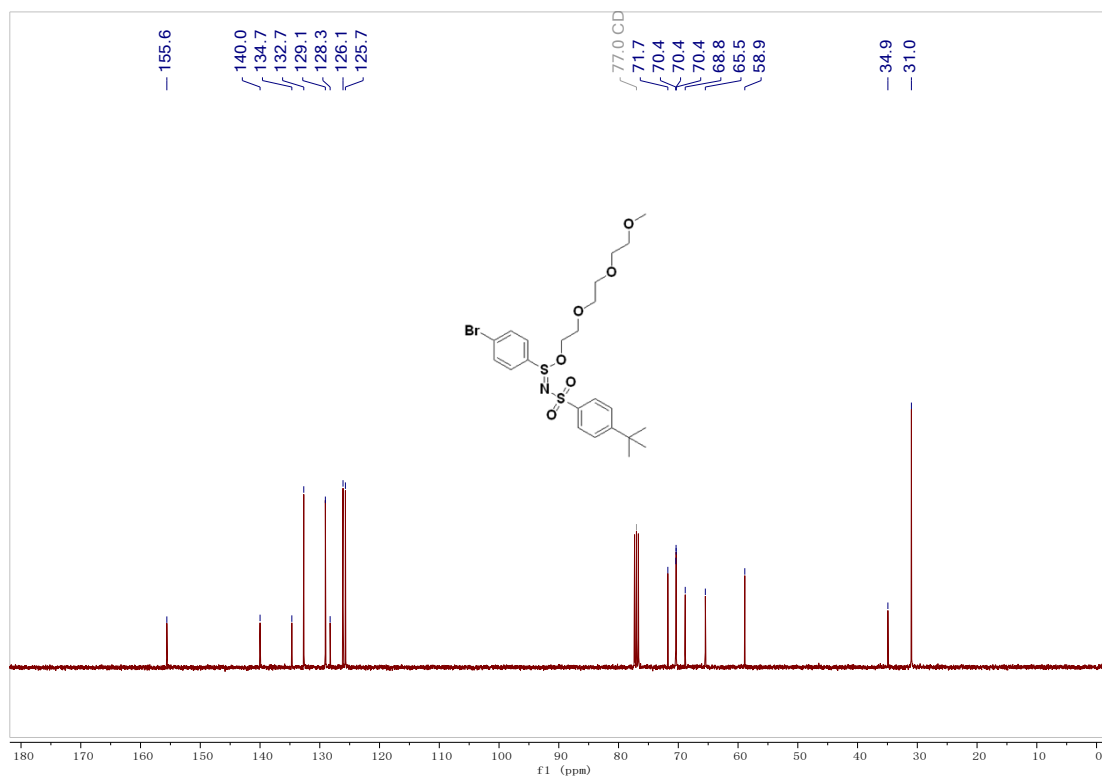

**<sup>1</sup>H NMR (400 MHz, Chloroform-*d*) of compound 6ab**

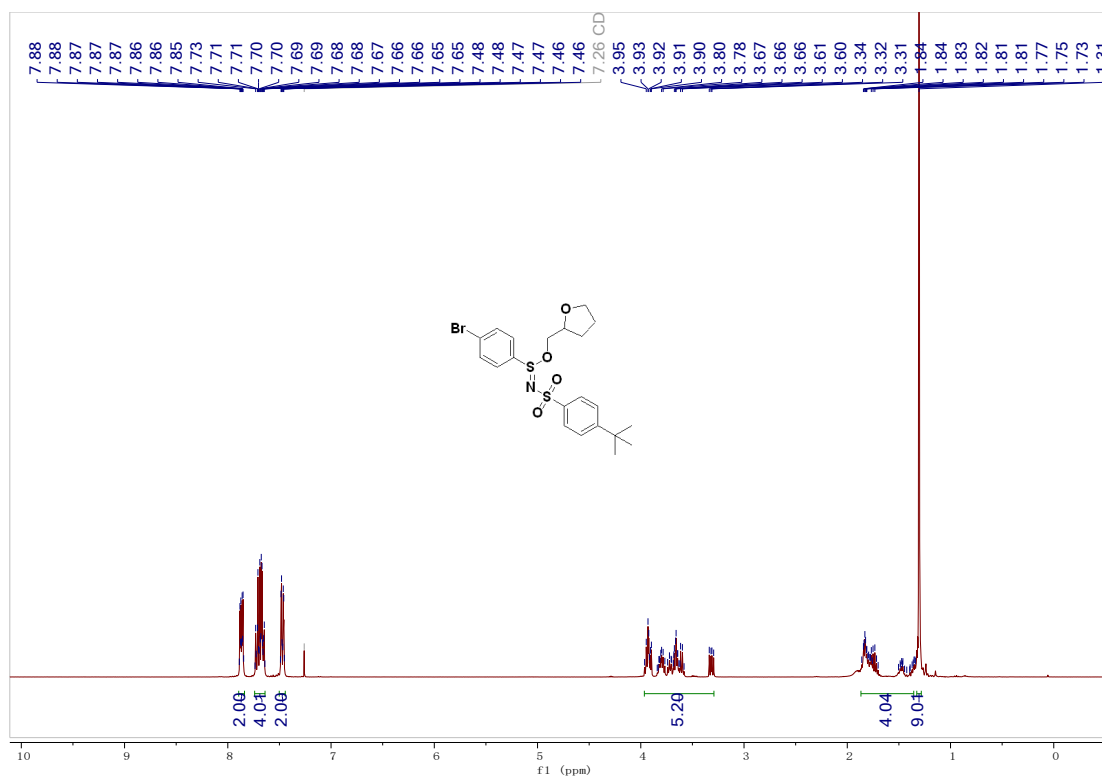

**<sup>13</sup>C NMR (100 MHz, Chloroform-*d*) of compound 6ab**

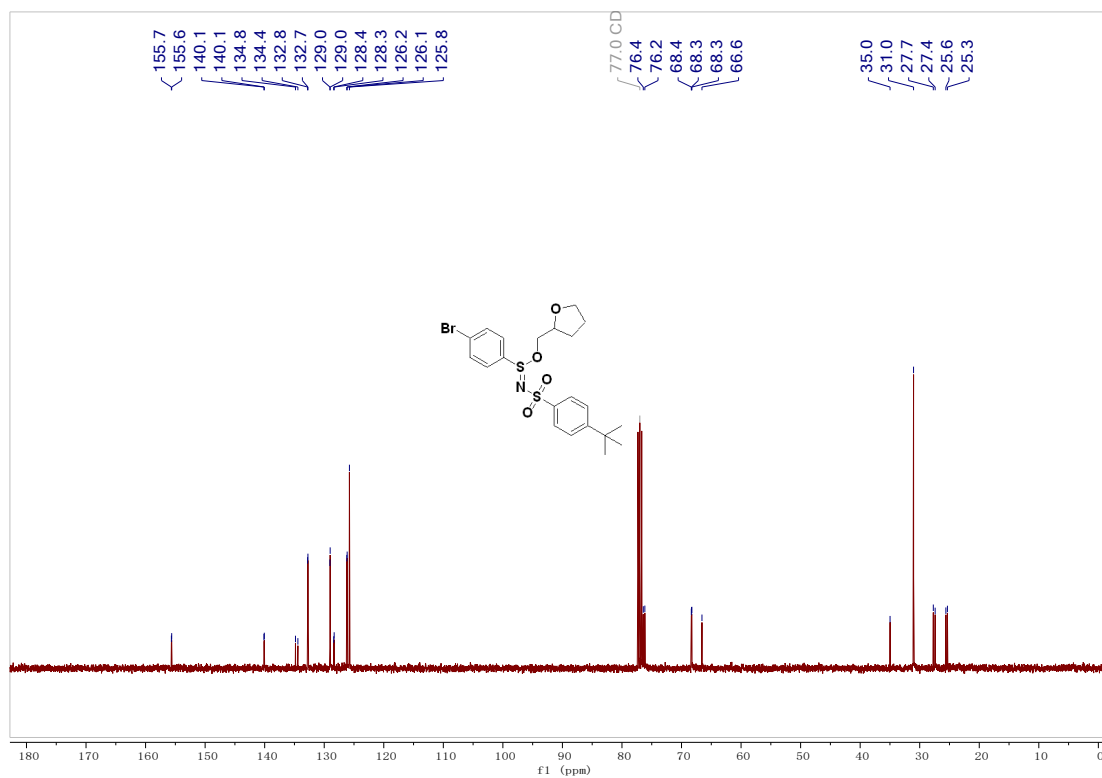



**<sup>1</sup>H NMR (400 MHz, Chloroform-*d*) of compound 6ac**

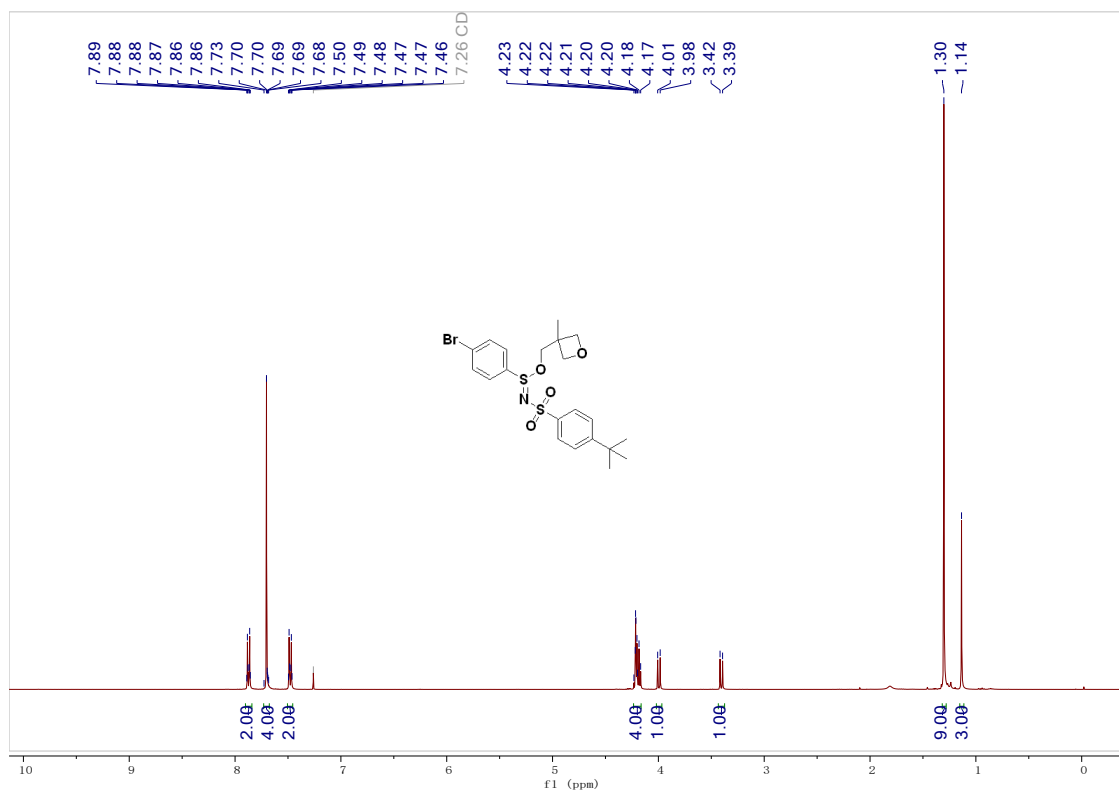

**<sup>13</sup>C NMR (100 MHz, Chloroform-*d*) of compound 6ac**

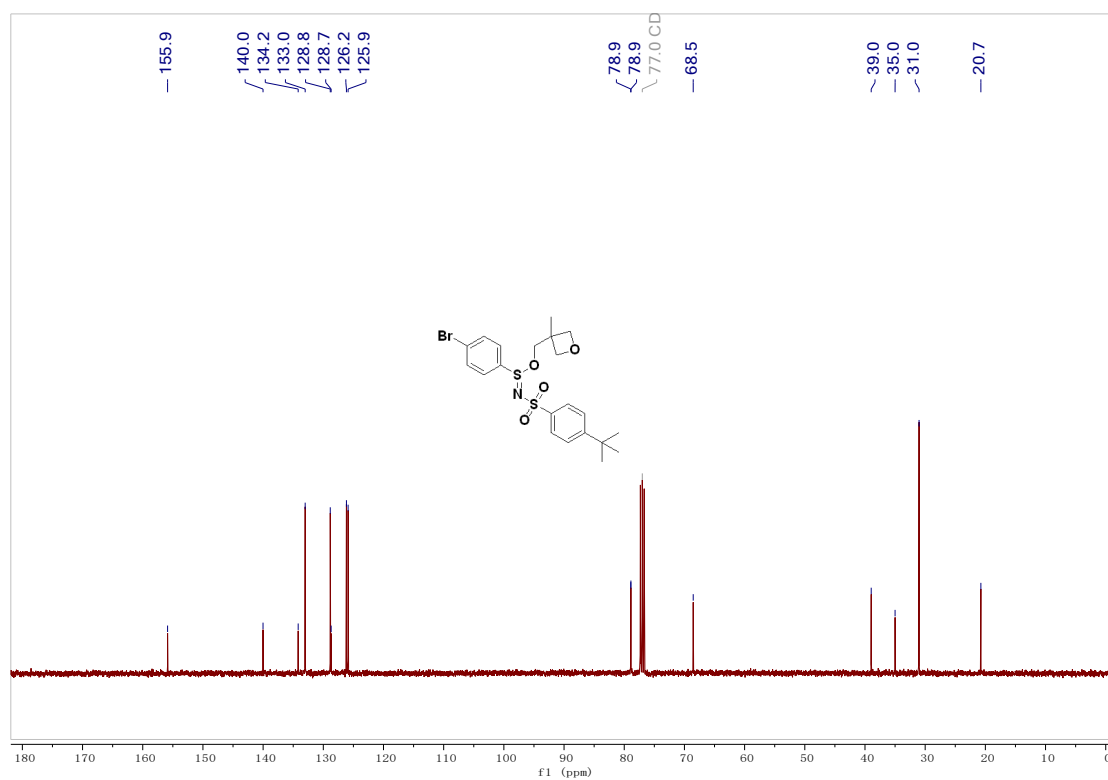

**<sup>1</sup>H NMR (400 MHz, Chloroform-*d*) of compound 6ad**

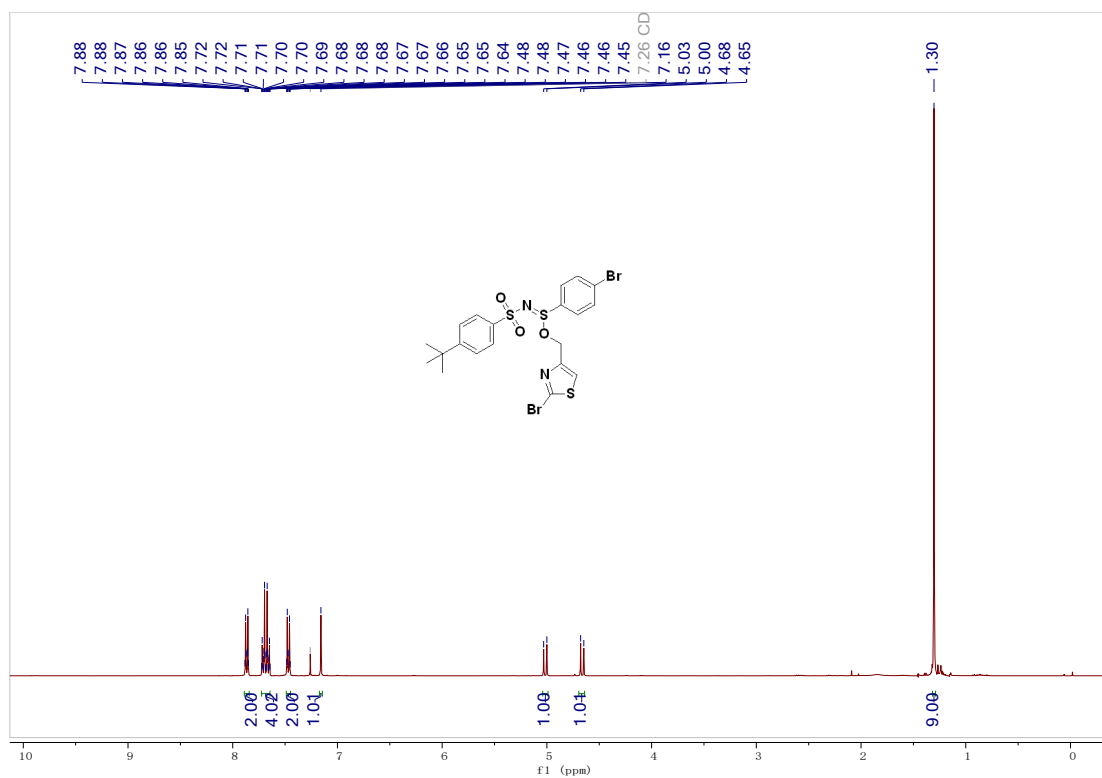

**<sup>13</sup>C NMR (100 MHz, Chloroform-*d*) of compound 6ad**

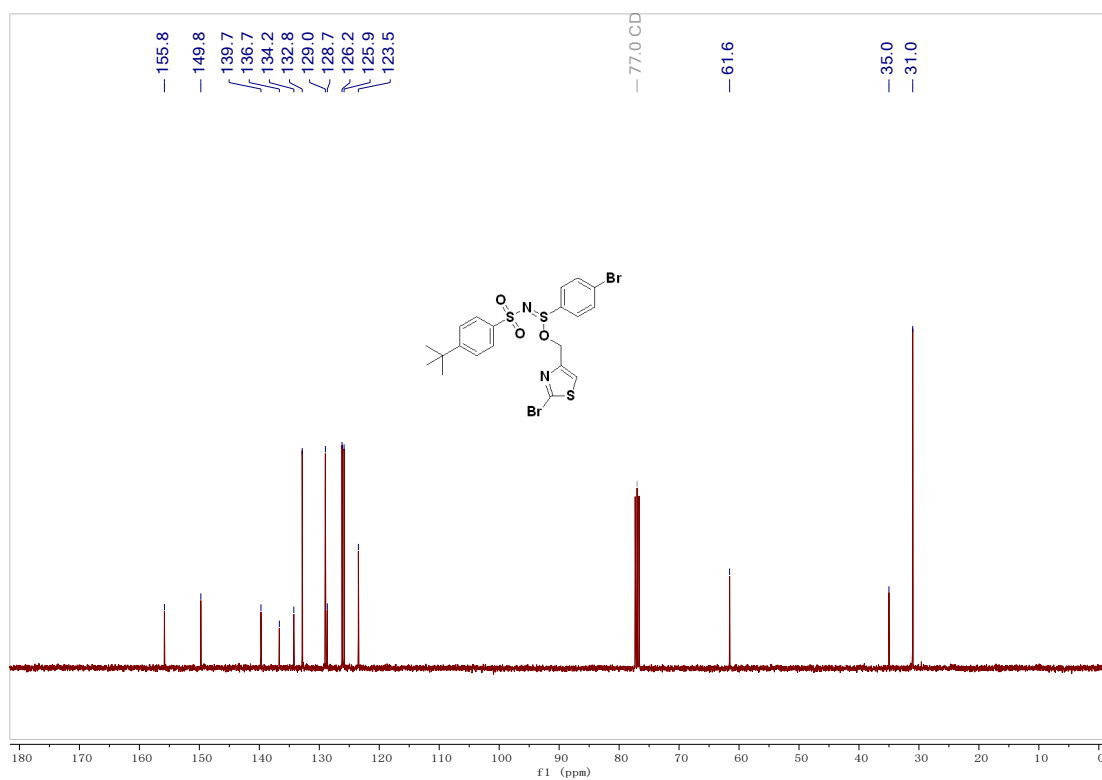

**<sup>1</sup>H NMR (400 MHz, Chloroform-*d*) of compound 6ae**

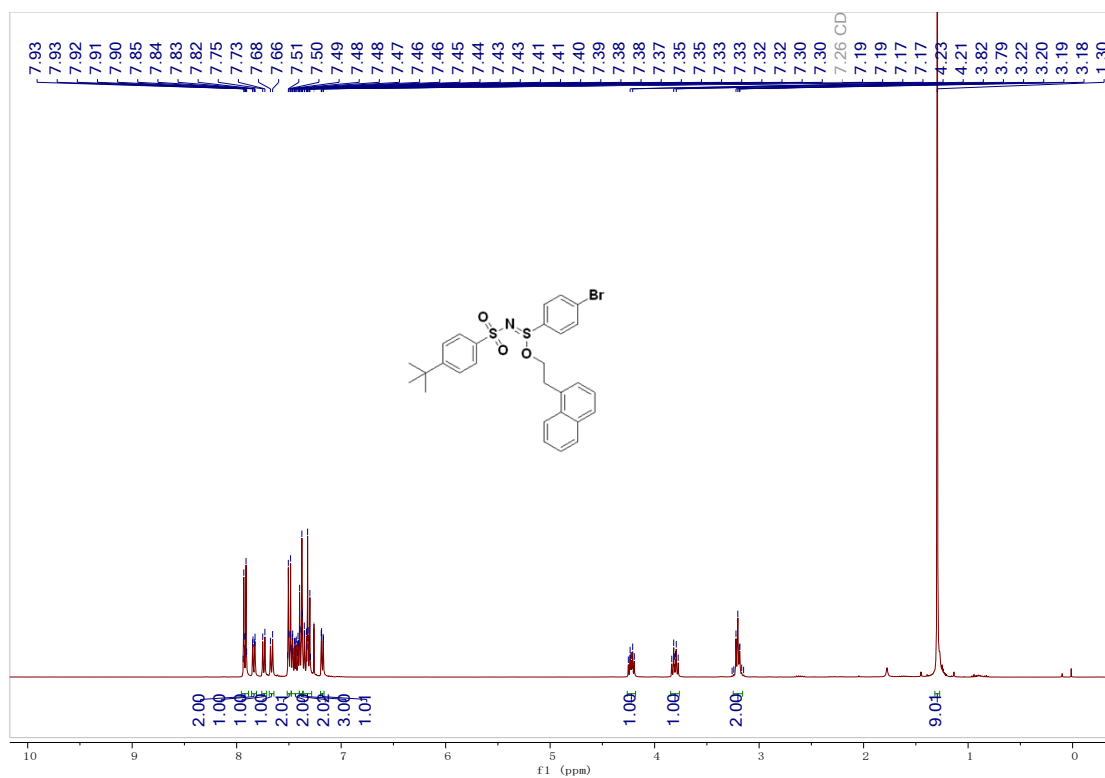

**<sup>13</sup>C NMR (100 MHz, Chloroform-*d*) of compound 6ae**

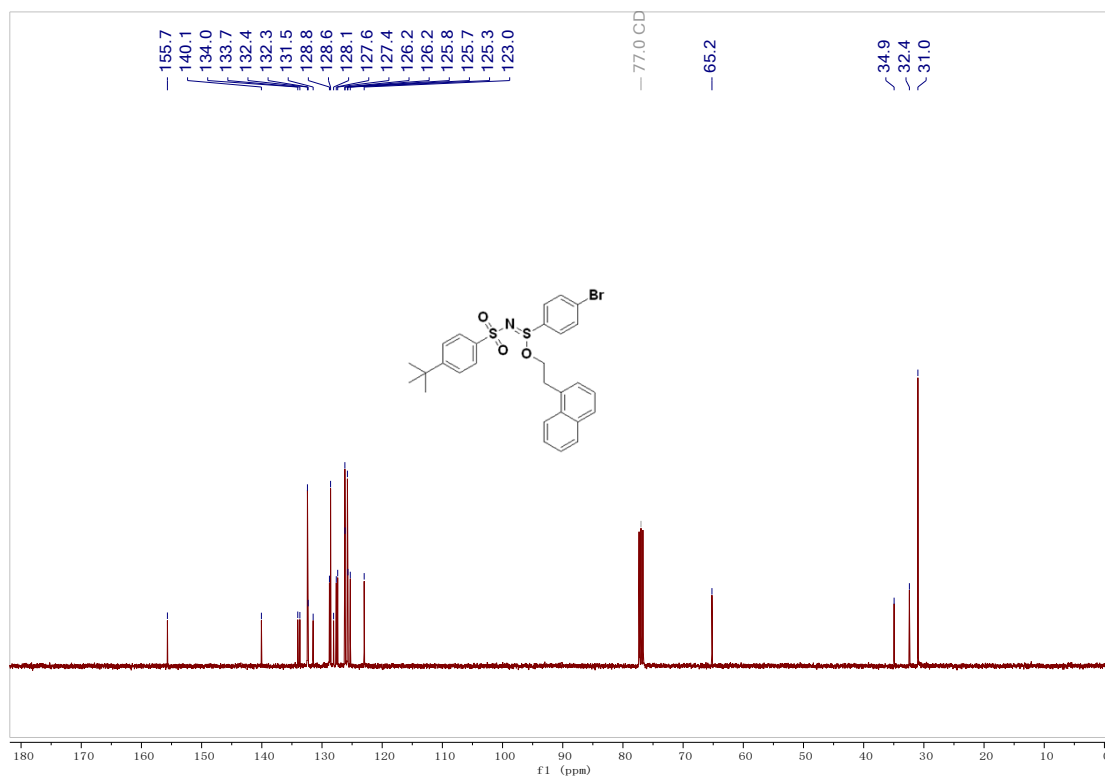

**<sup>1</sup>H NMR (400 MHz, Chloroform-*d*) of compound 6af**

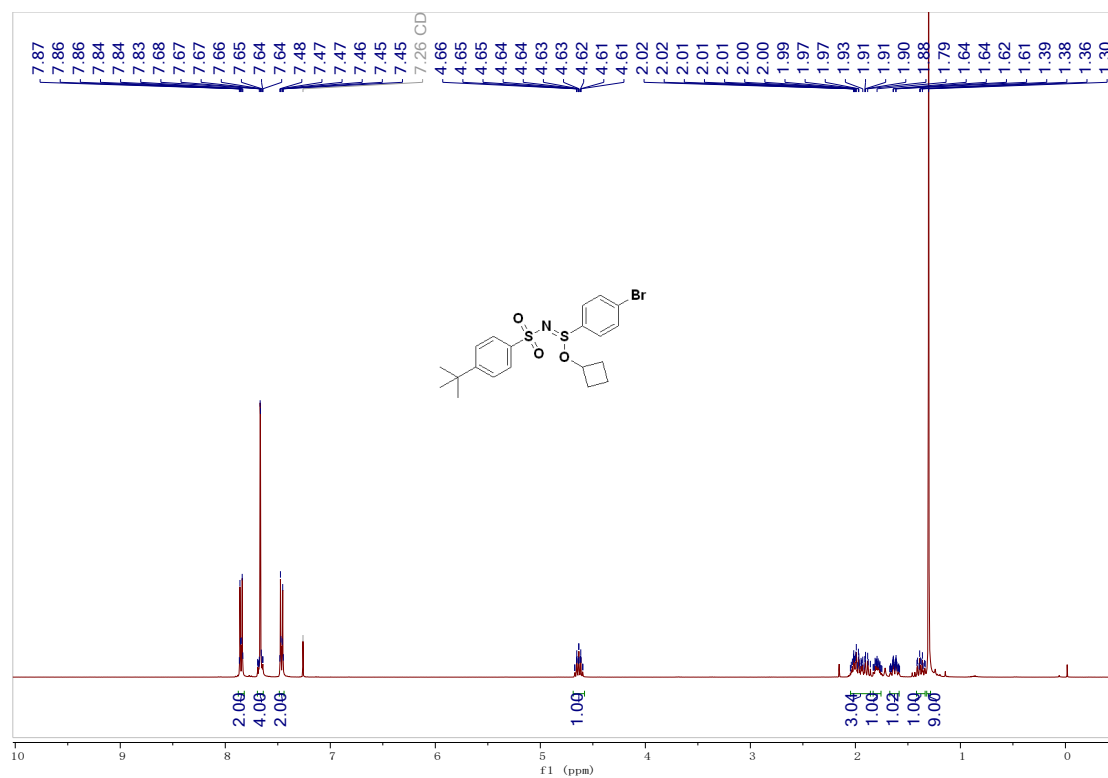

**<sup>13</sup>C NMR (100 MHz, Chloroform-*d*) of compound 6af**

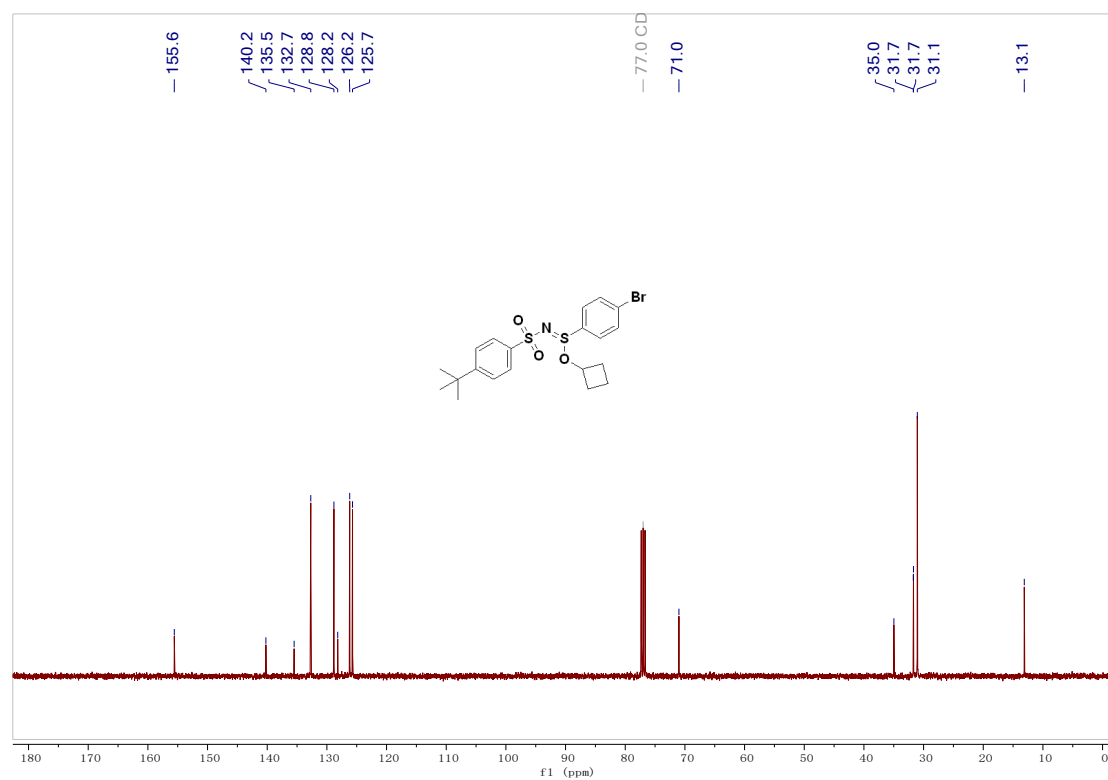

**<sup>1</sup>H NMR (400 MHz, Chloroform-*d*) of compound 6ag**

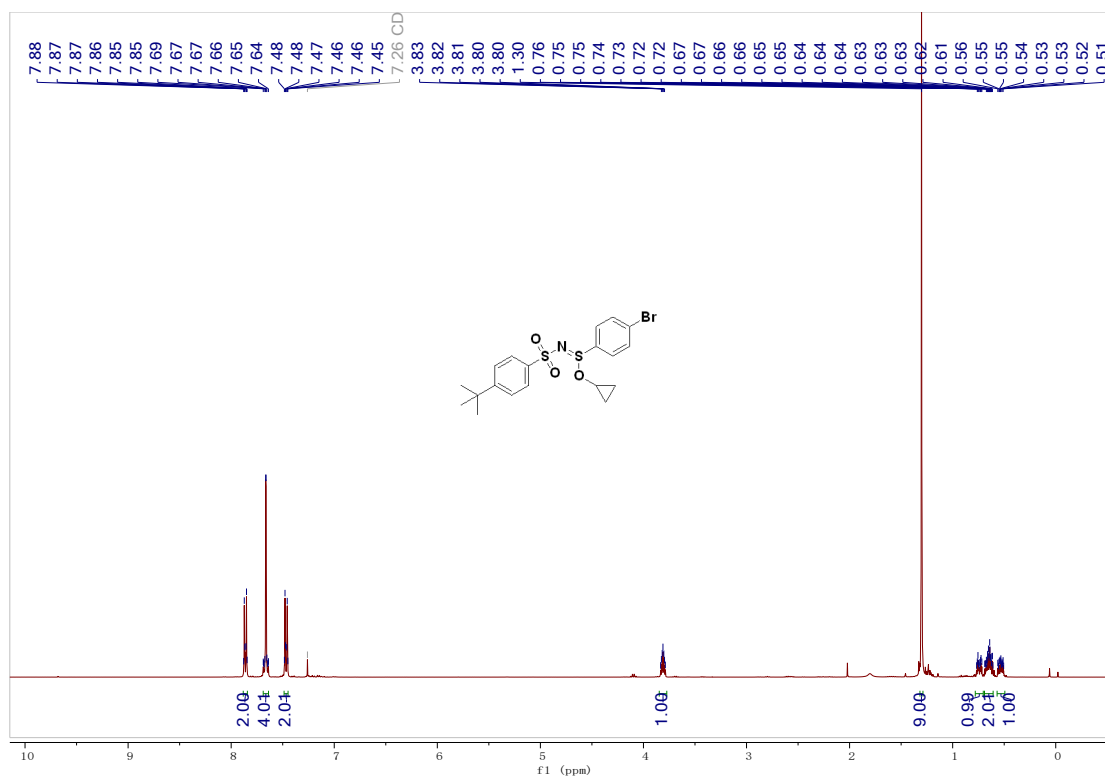

**<sup>13</sup>C NMR (100 MHz, Chloroform-*d*) of compound 6ag**

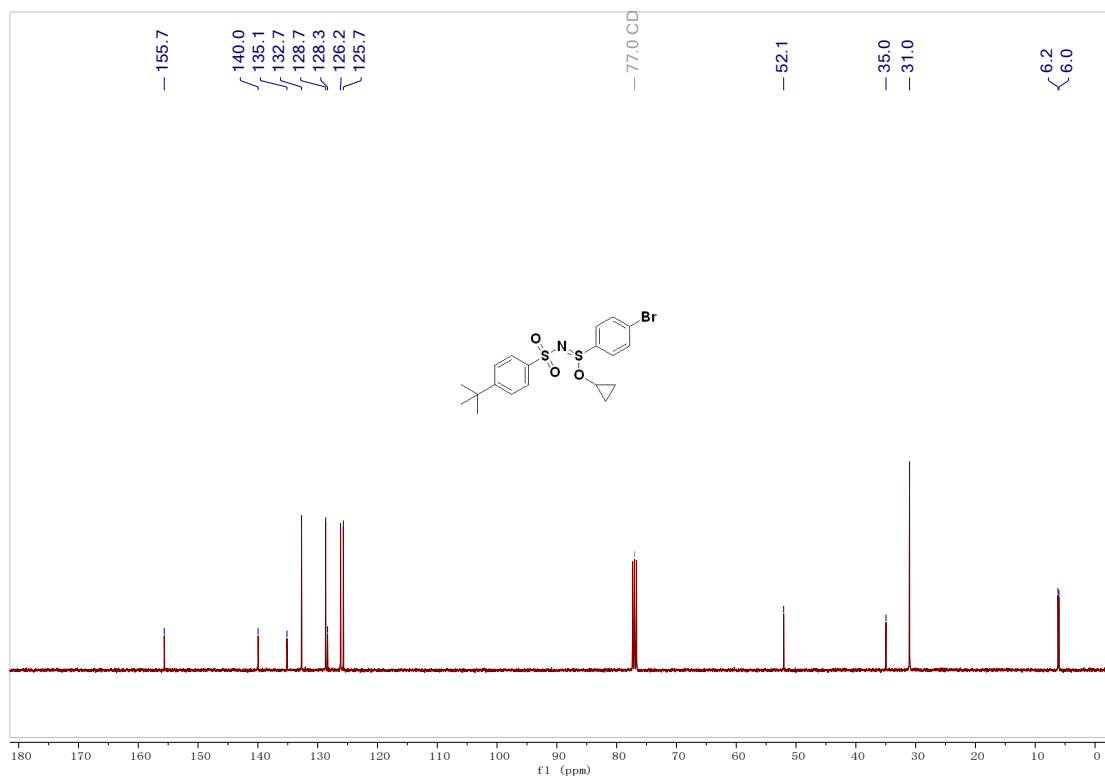

**<sup>1</sup>H NMR (400 MHz, Chloroform-*d*) of compound 6ah**

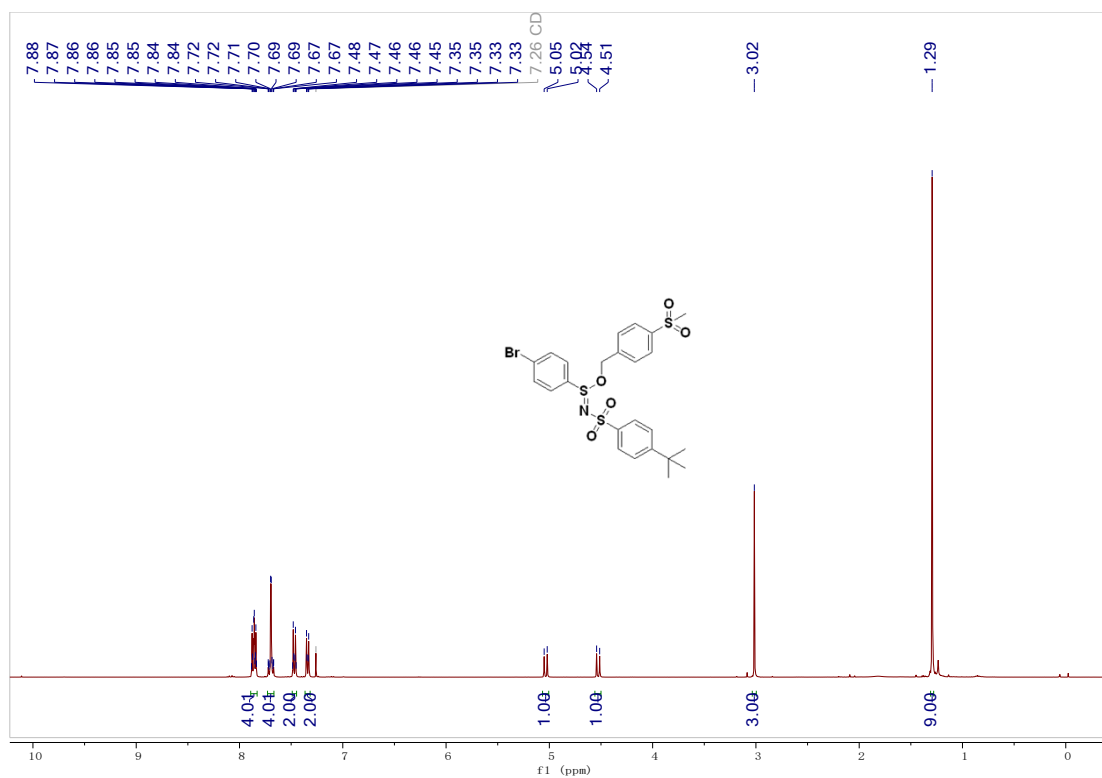

**<sup>13</sup>C NMR (100 MHz, Chloroform-*d*) of compound 6ah**

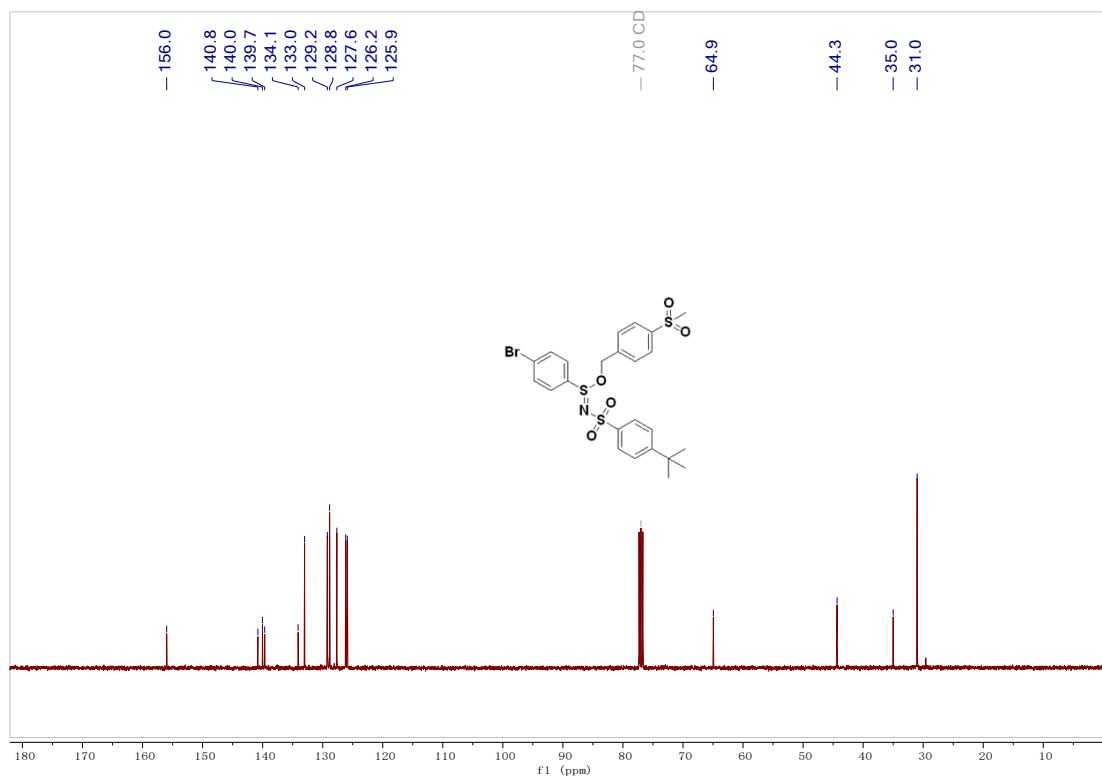

**<sup>1</sup>H NMR (400 MHz, Chloroform-*d*) of compound 6ai**

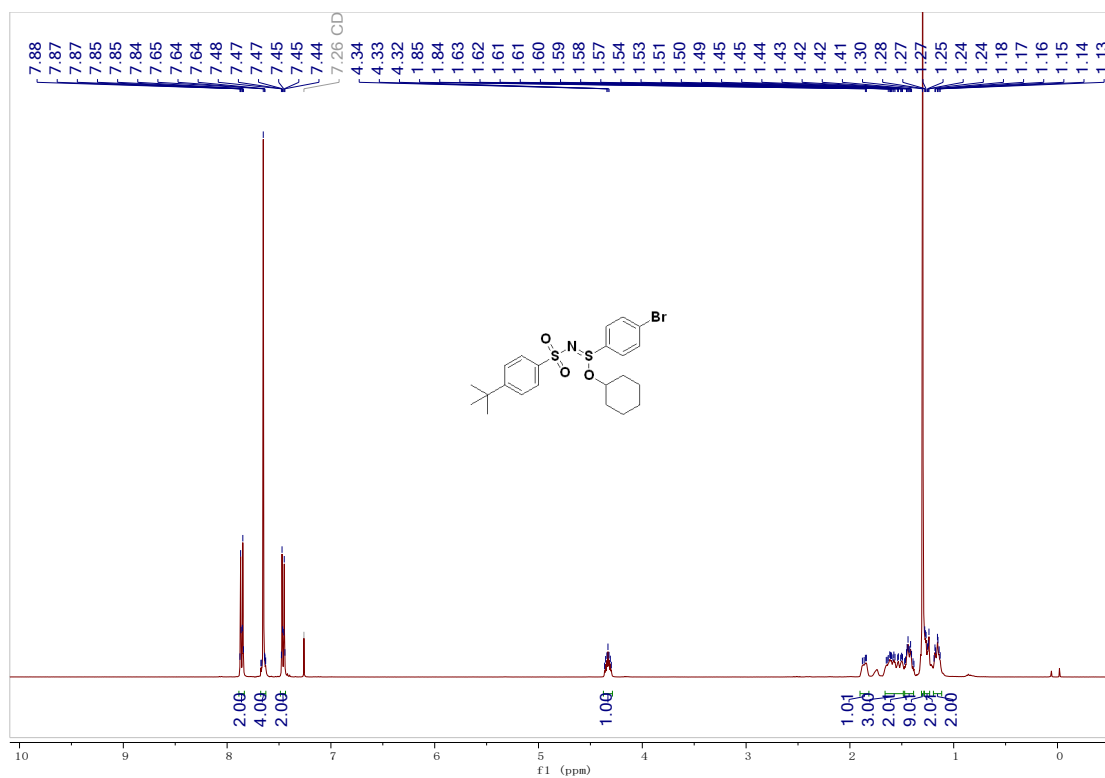

**<sup>13</sup>C NMR (100 MHz, Chloroform-*d*) of compound 6ai**

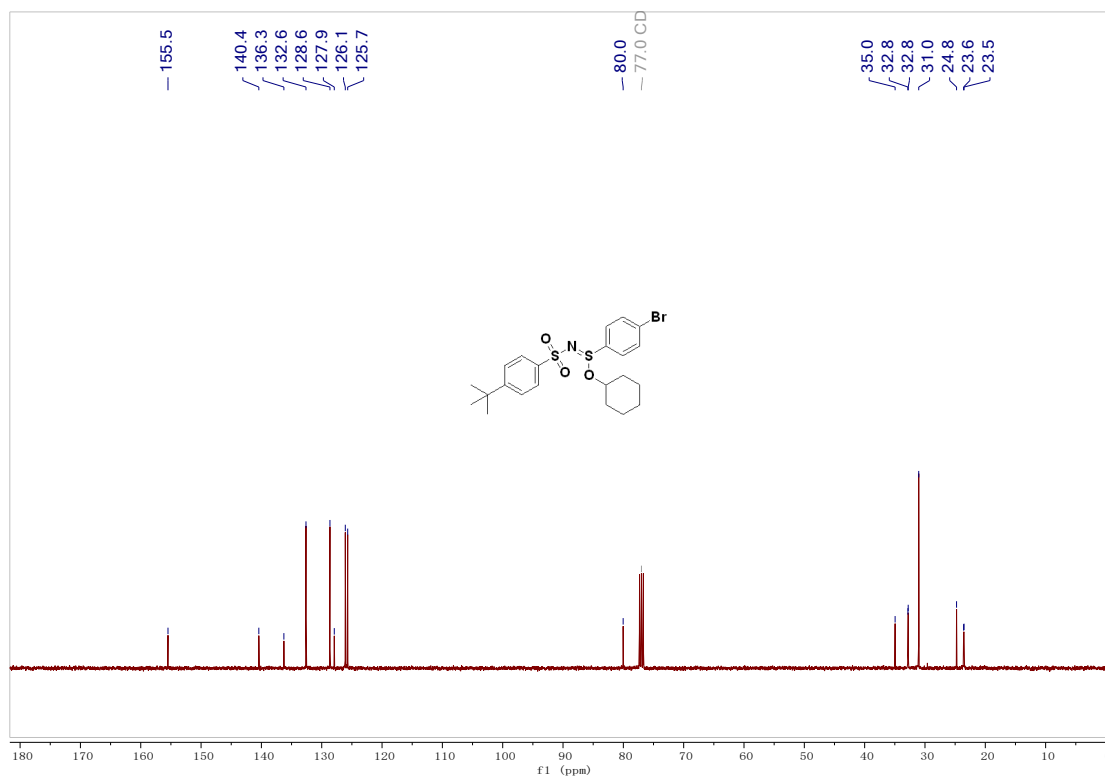

**<sup>1</sup>H NMR (400 MHz, Chloroform-*d*) of compound 6aj**

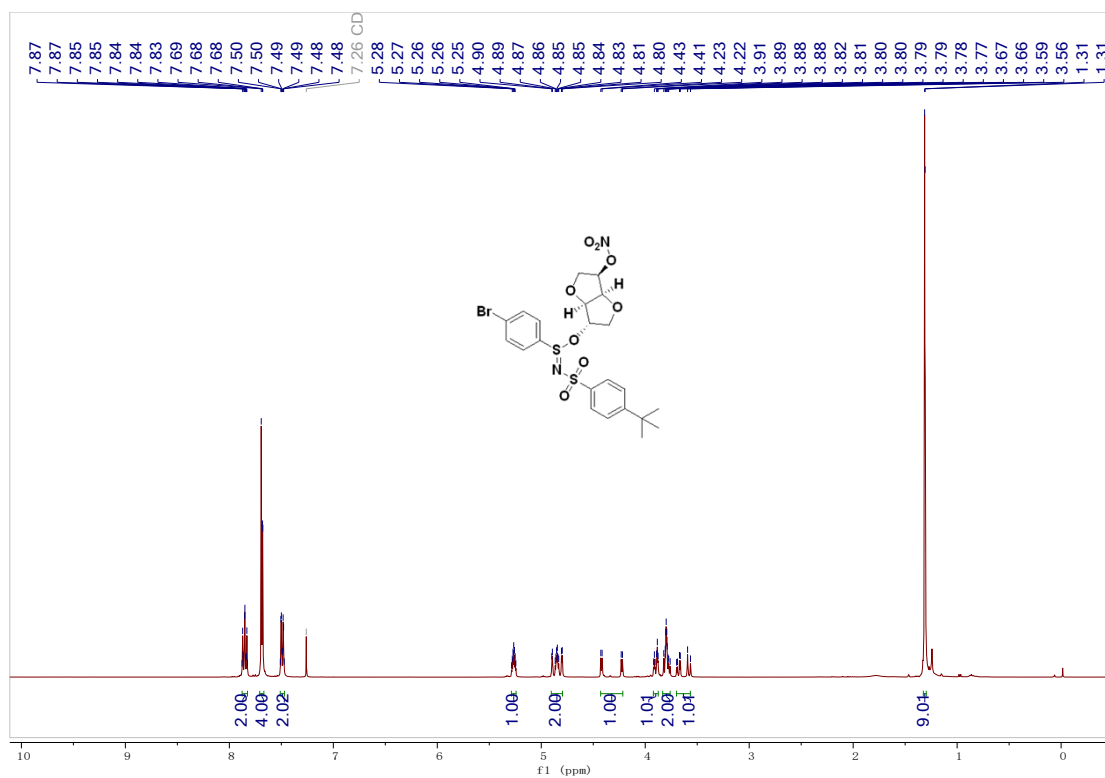

**<sup>13</sup>C NMR (100 MHz, Chloroform-*d*) of compound 6aj**

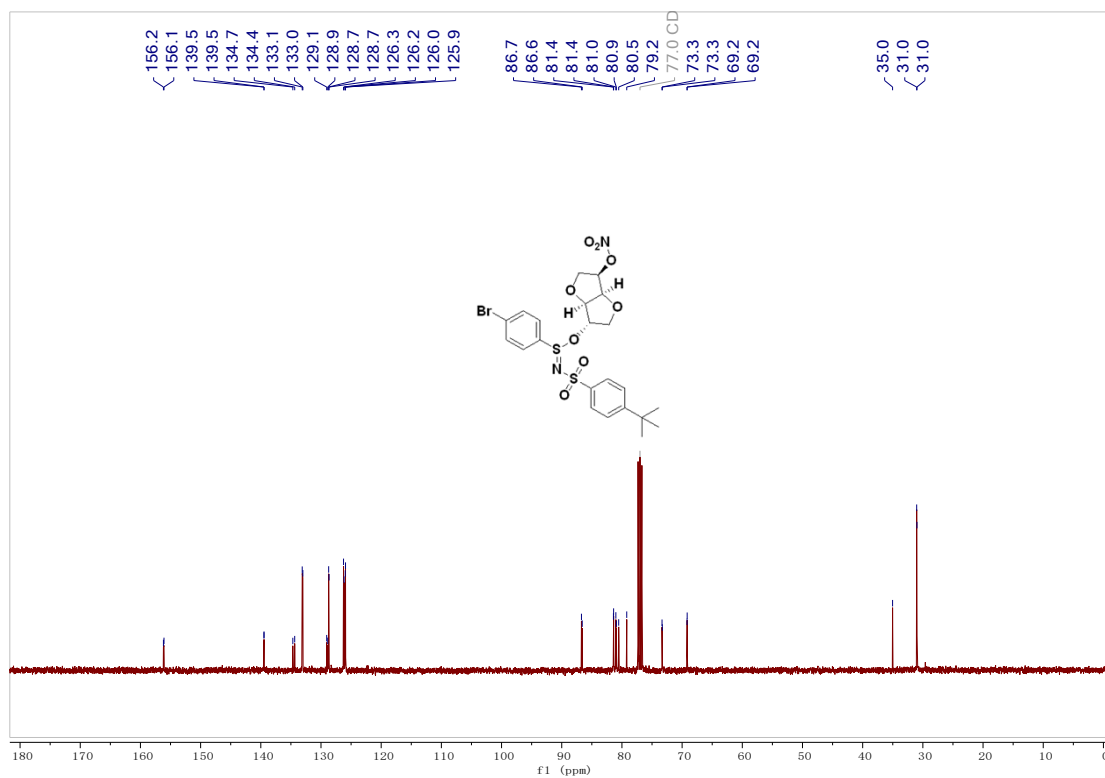



**<sup>1</sup>H NMR (400 MHz, Chloroform-*d*) of compound 6ak**

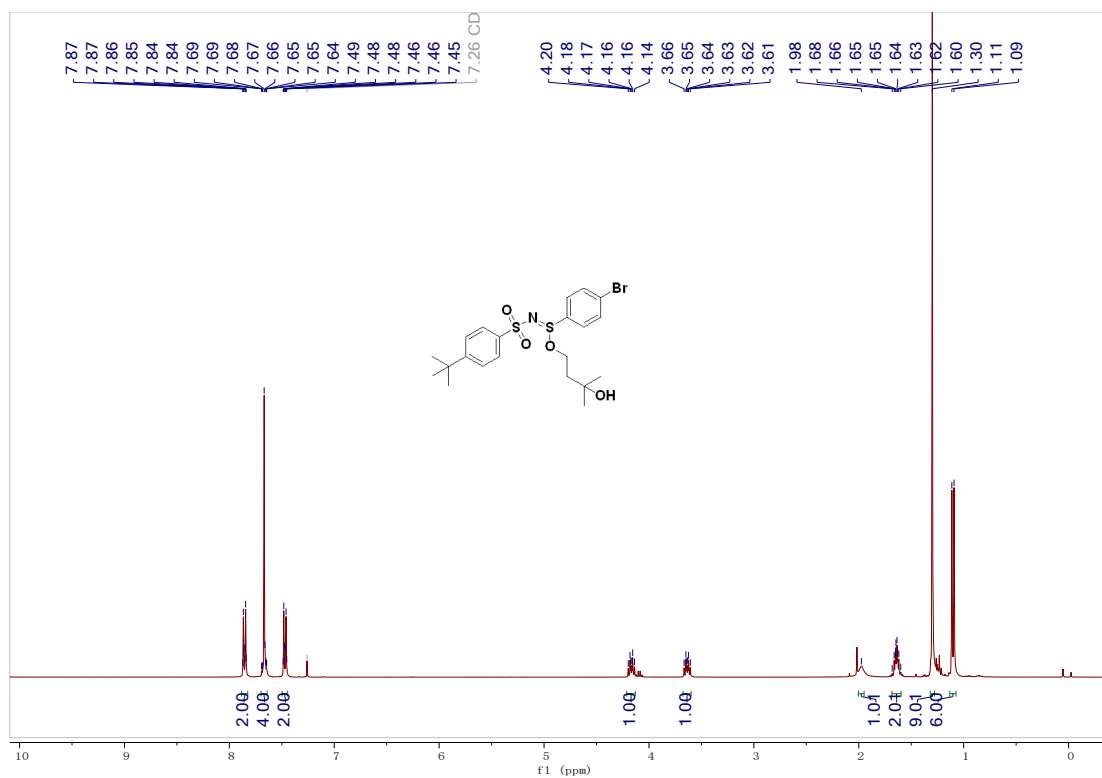

**<sup>13</sup>C NMR (100 MHz, Chloroform-*d*) of compound 6ak**

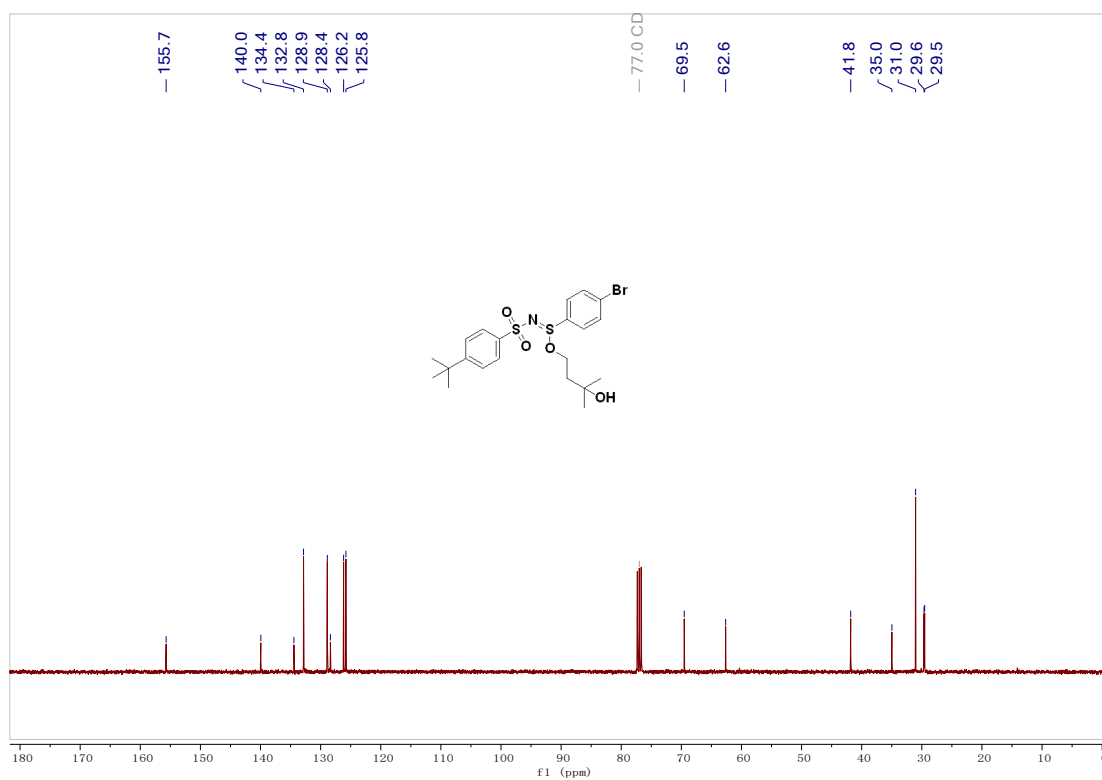

**<sup>1</sup>H NMR (400 MHz, Chloroform-*d*) of compound 6al**

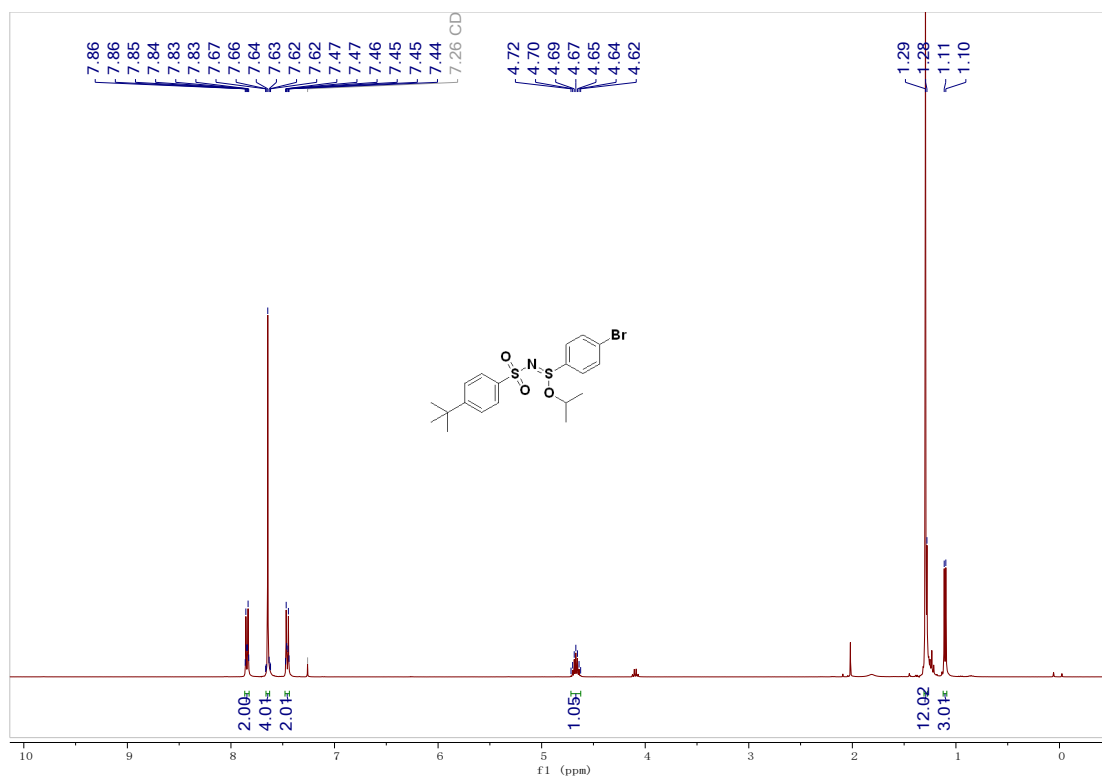

**<sup>13</sup>C NMR (100 MHz, Chloroform-*d*) of compound 6al**

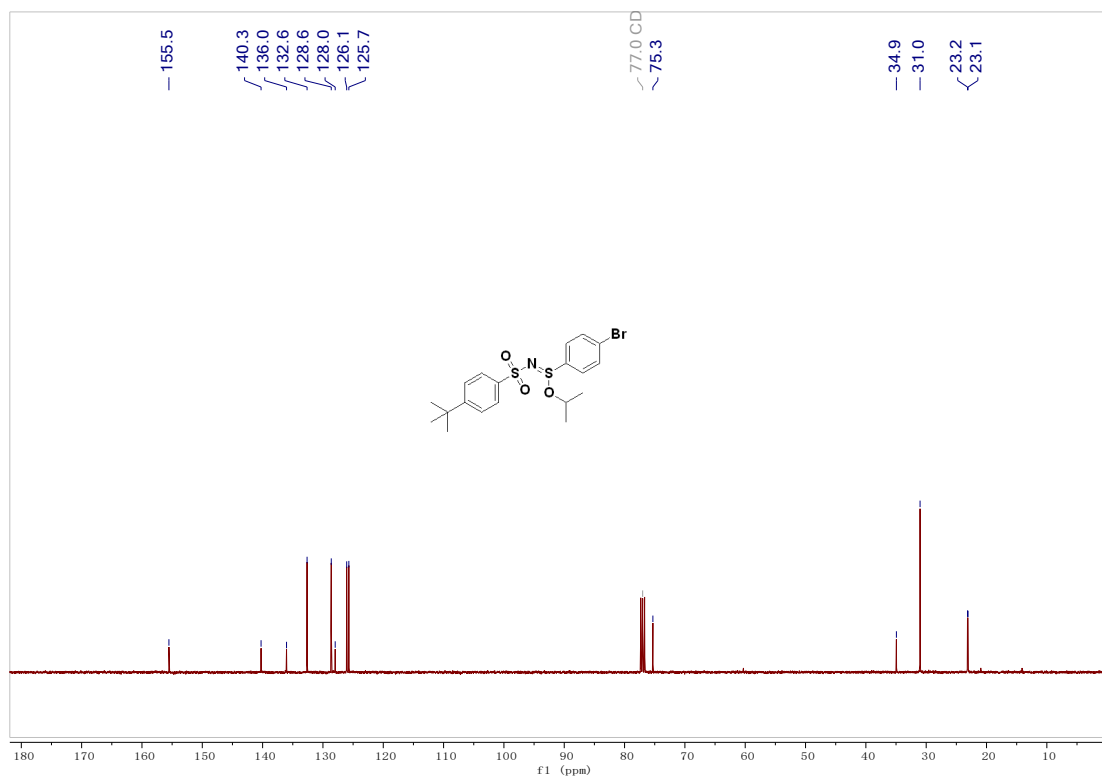

<sup>1</sup>H NMR (400 MHz, Chloroform-*d*) of compound **6am**

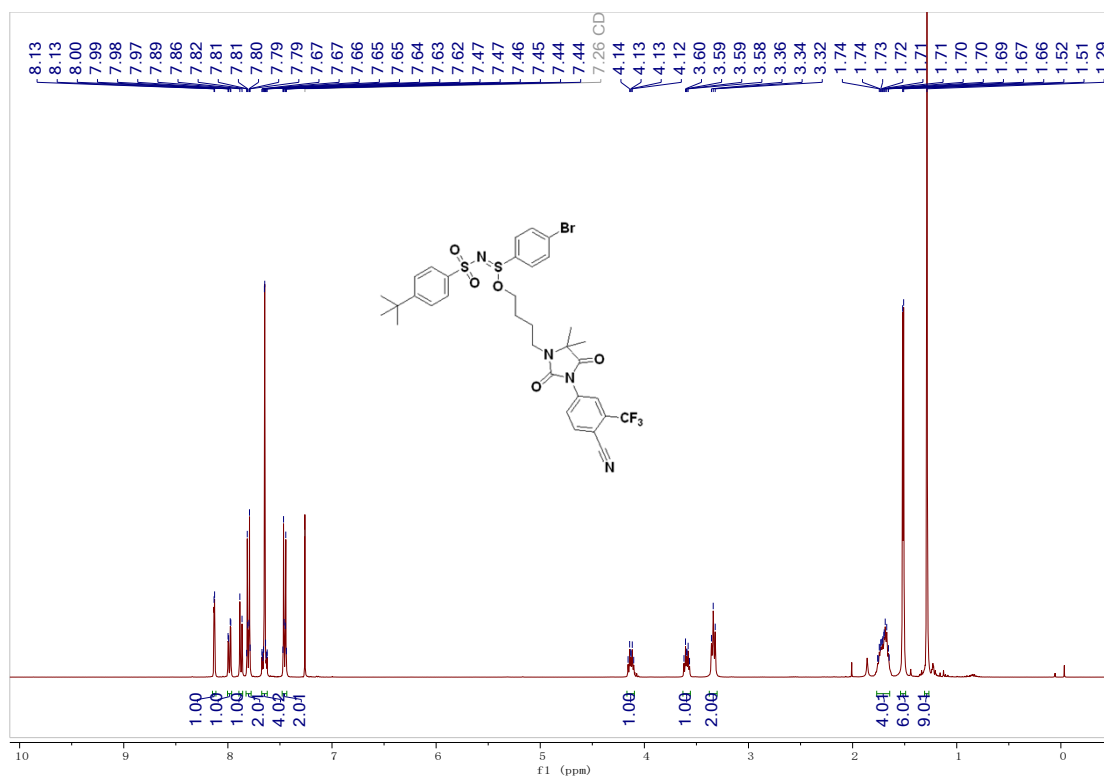

<sup>13</sup>C NMR (100 MHz, Chloroform-*d*) of compound **6am**

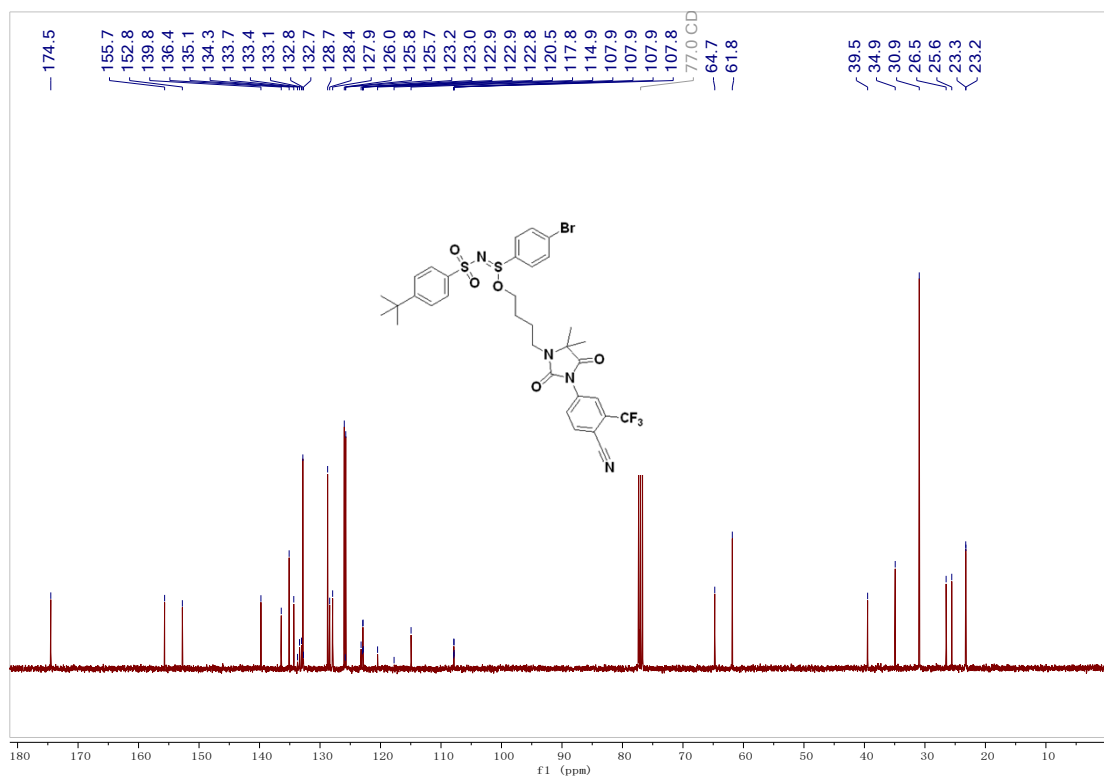

**<sup>19</sup>F NMR (376 MHz, Chloroform-d) of compound 6am**

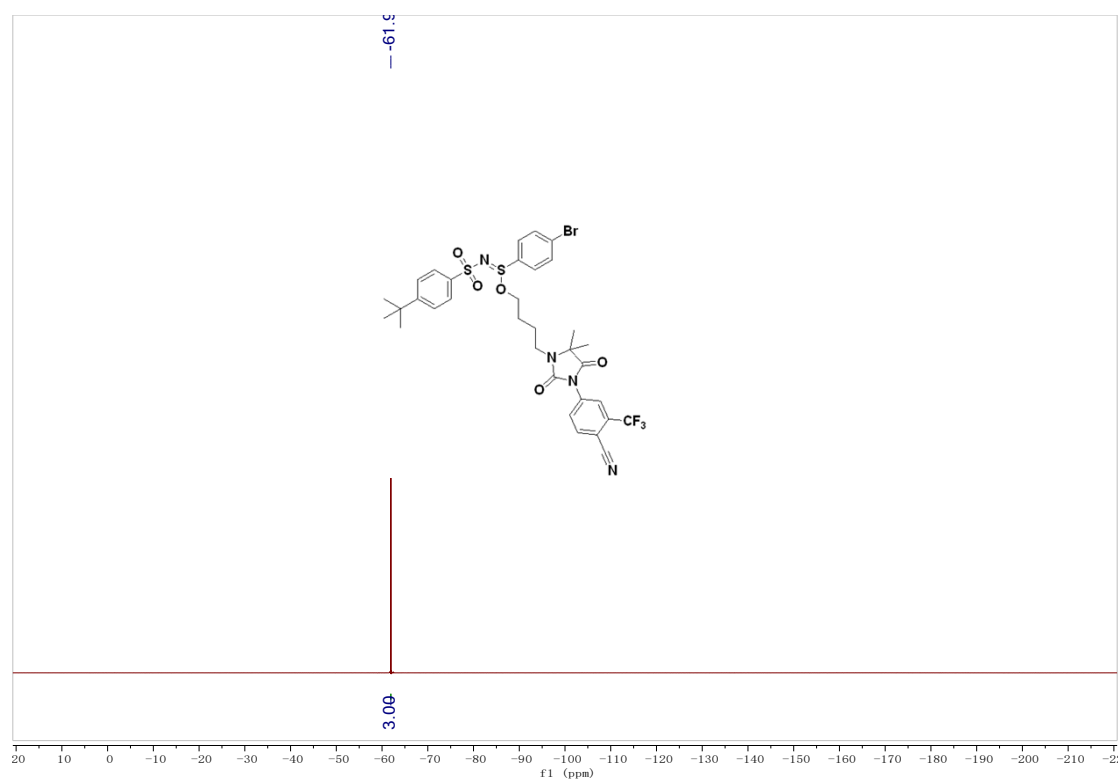

**<sup>1</sup>H NMR (400 MHz, Chloroform-d) of compound 7a**

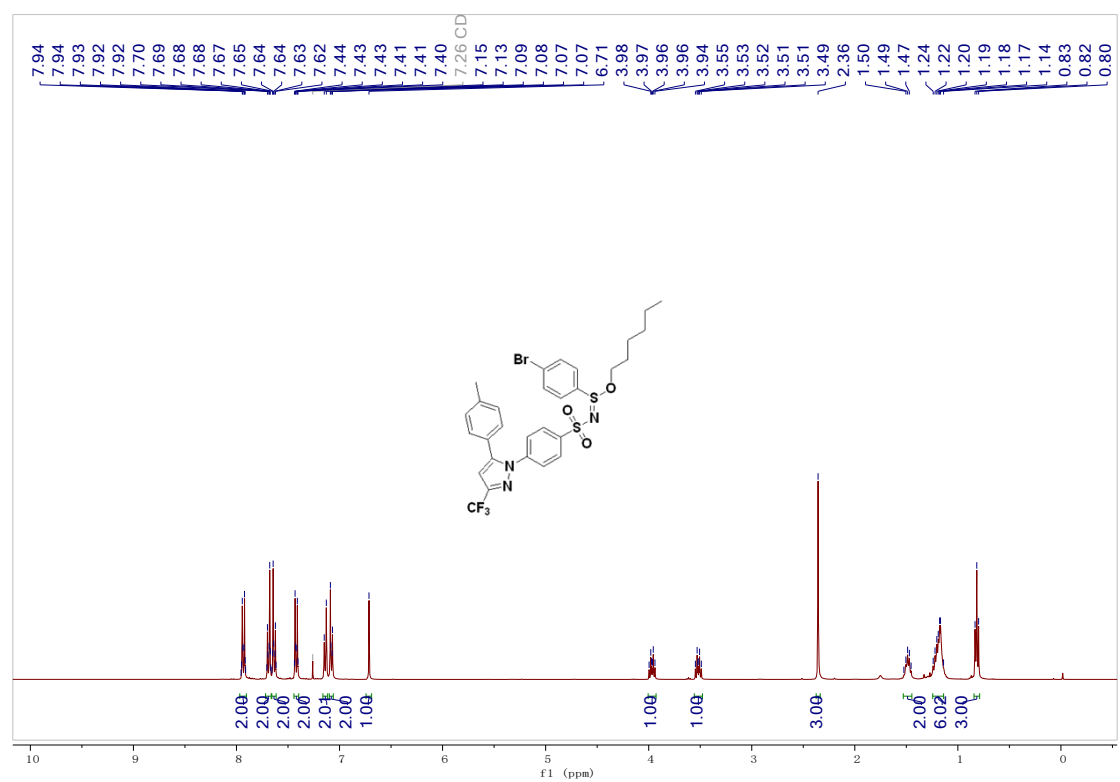

<sup>13</sup>C NMR (100 MHz, Chloroform-*d*) of compound **7a**

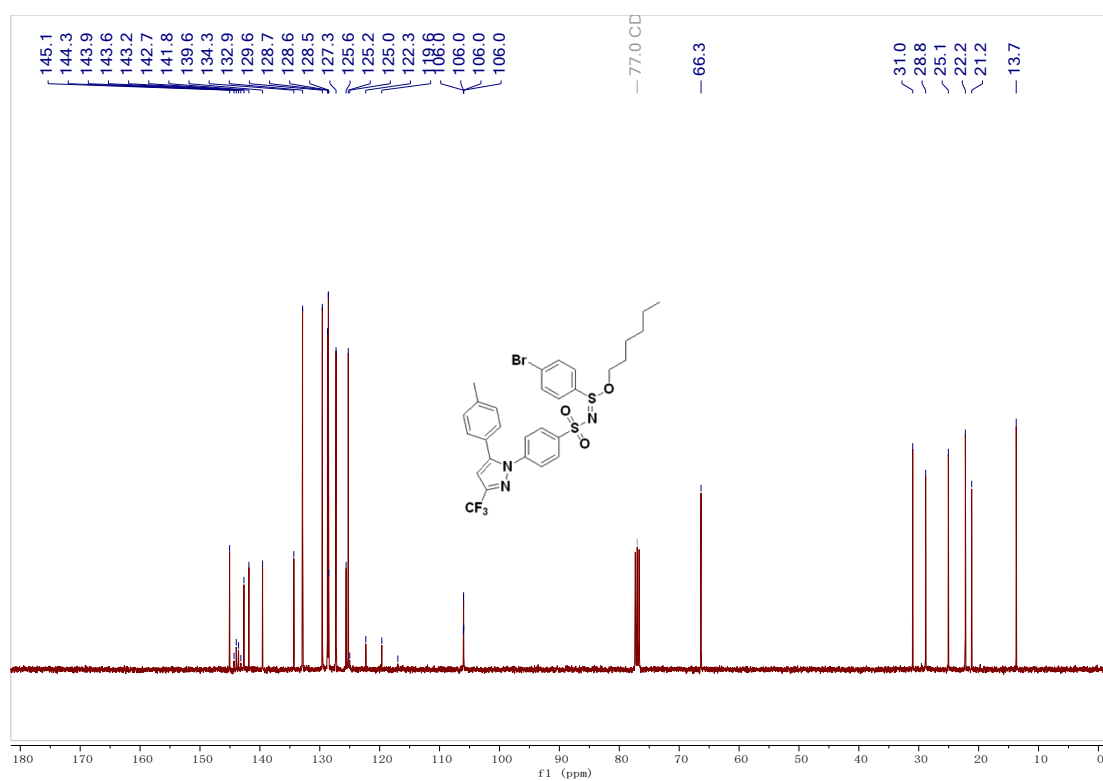

<sup>19</sup>F NMR (376 MHz, Chloroform-*d*) of compound **7a**

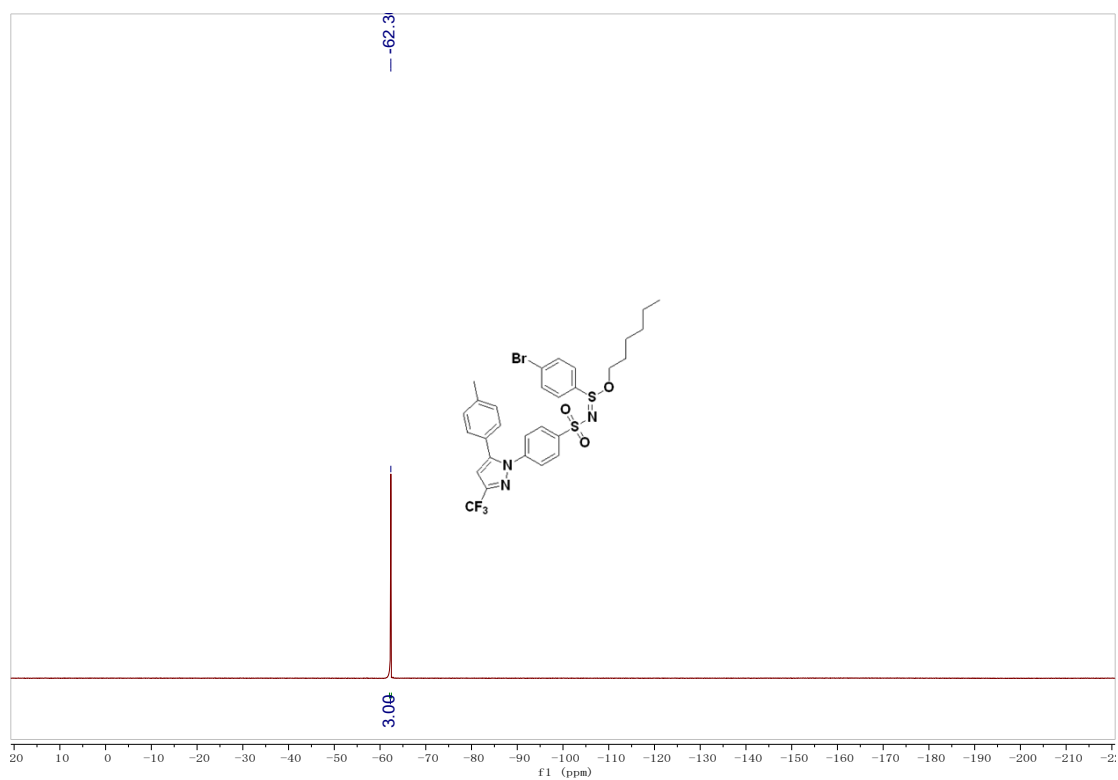

<sup>1</sup>H NMR (400 MHz, Chloroform-*d*) of compound **7b**

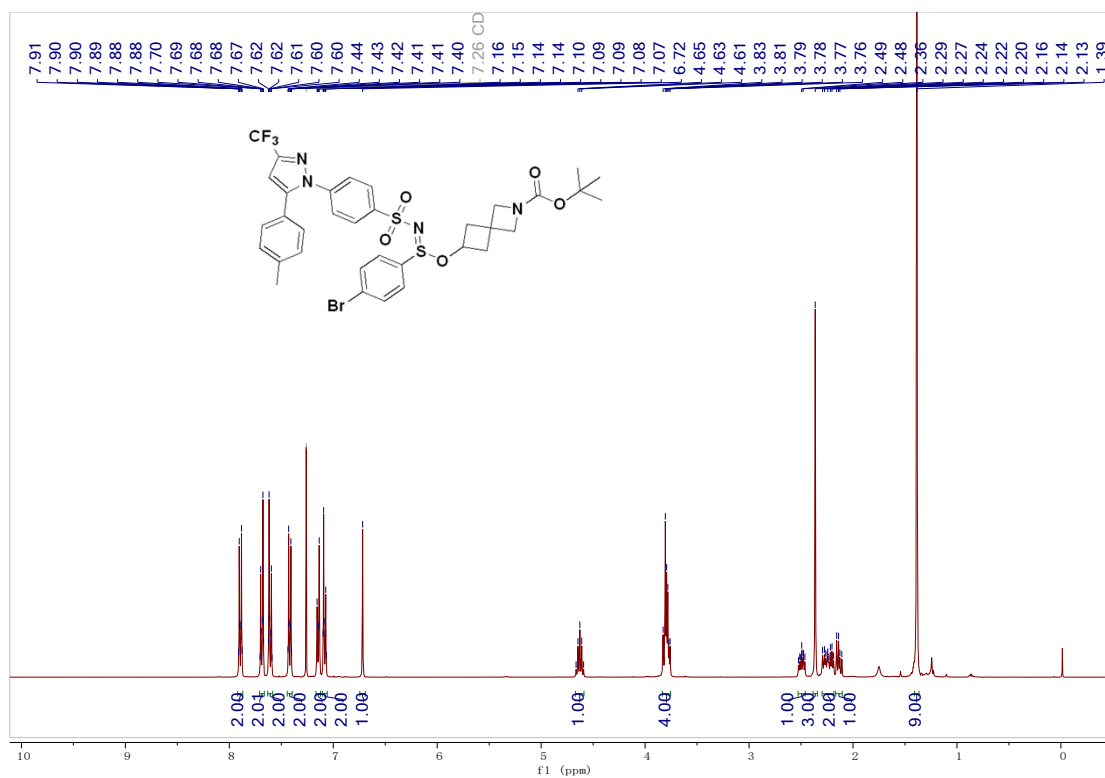

<sup>13</sup>C NMR (100 MHz, Chloroform-*d*) of compound **7b**

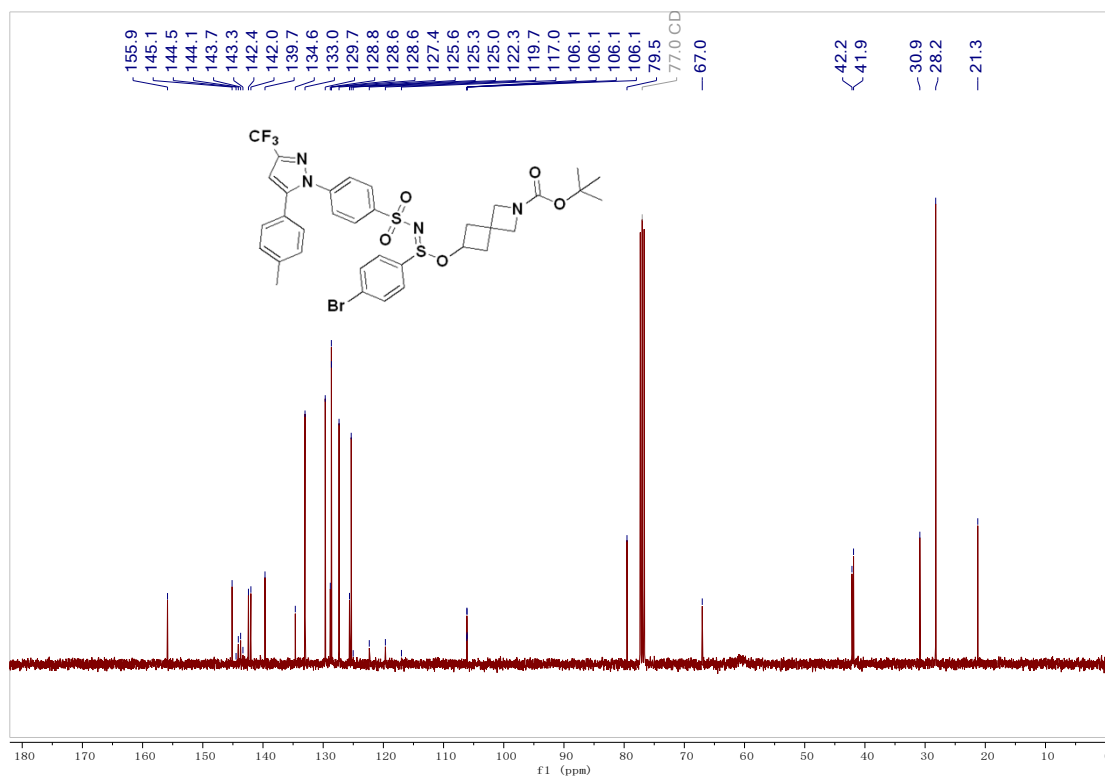

**<sup>19</sup>F NMR (376 MHz, Chloroform-d) of compound 7b**

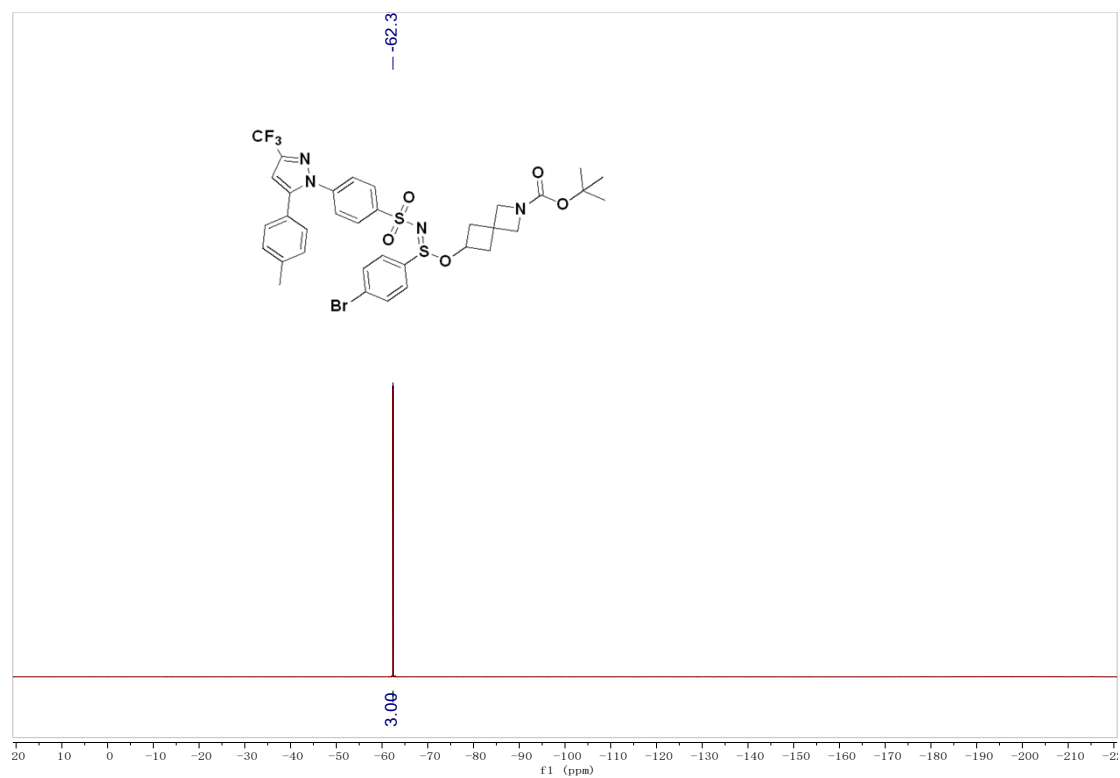

**<sup>1</sup>H NMR (400 MHz, Chloroform-d) of compound 7c**

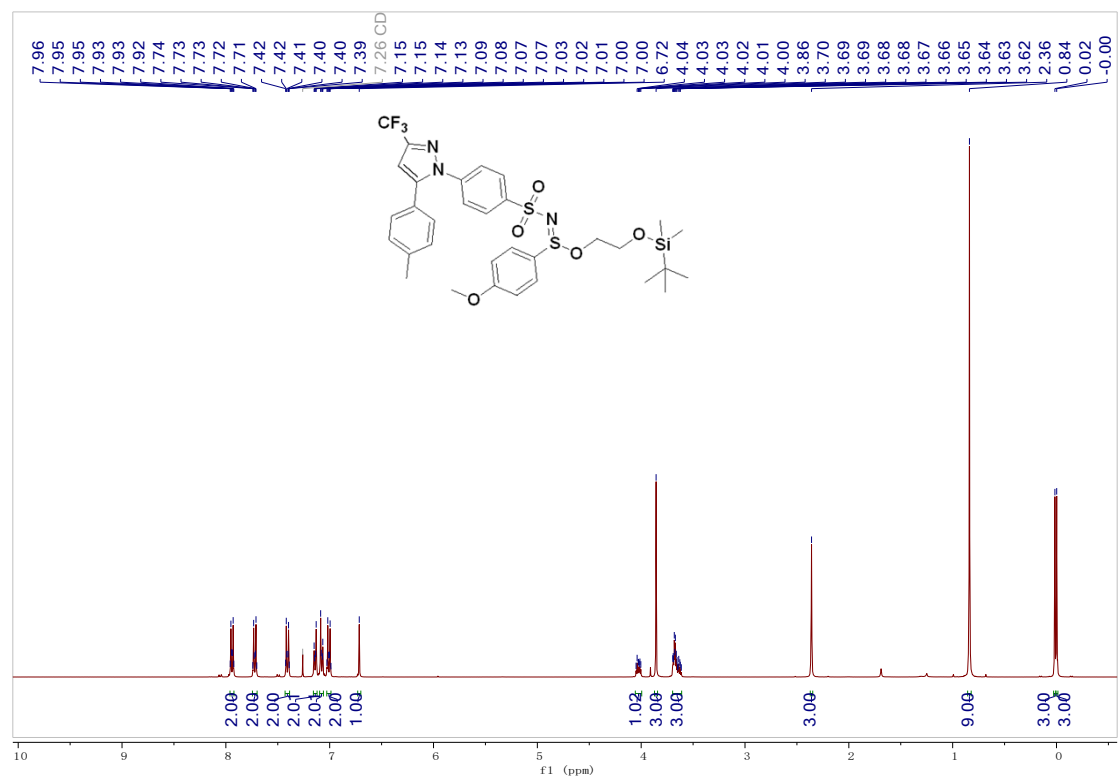

<sup>13</sup>C NMR (100 MHz, Chloroform-*d*) of compound **7c**

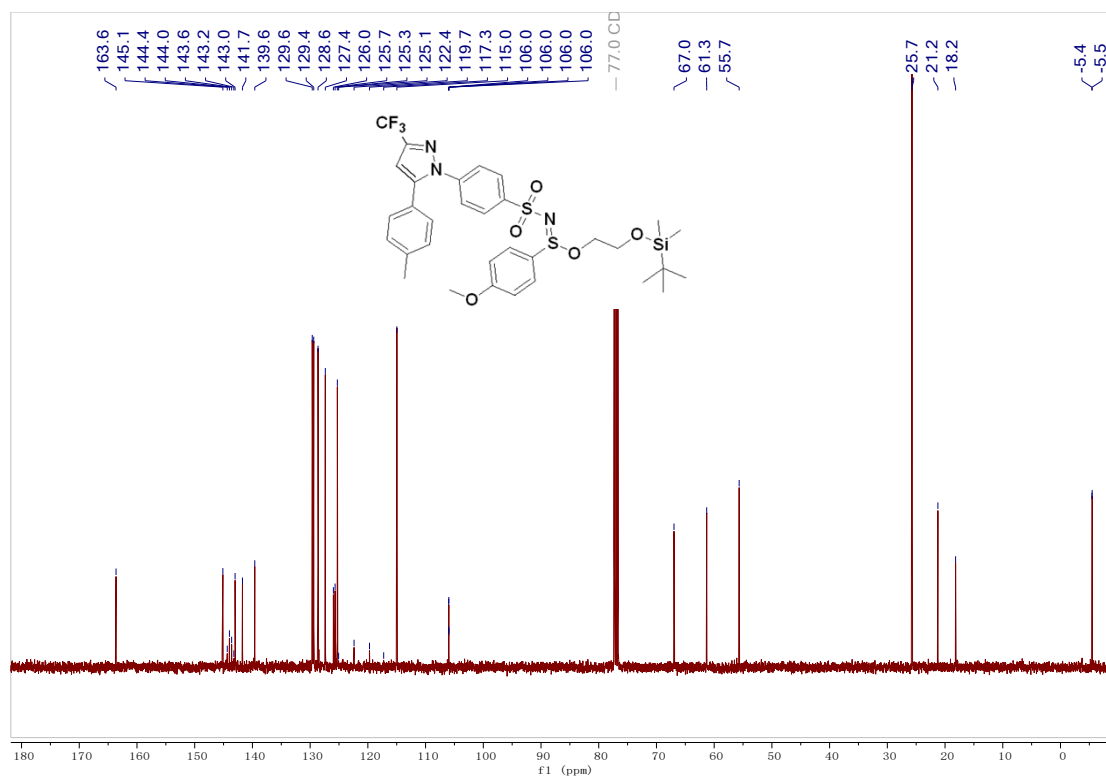

<sup>19</sup>F NMR (376 MHz, Chloroform-*d*) of compound **7c**

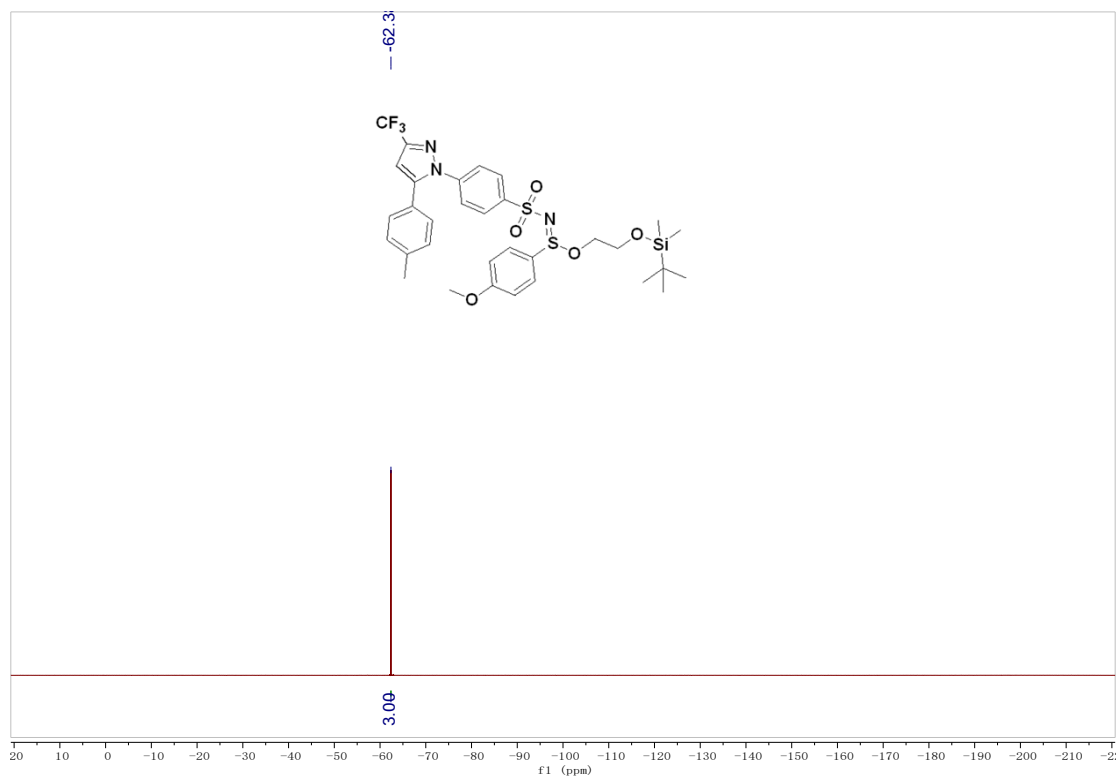



<sup>1</sup>H NMR (400 MHz, Chloroform-*d*) of compound **7d**

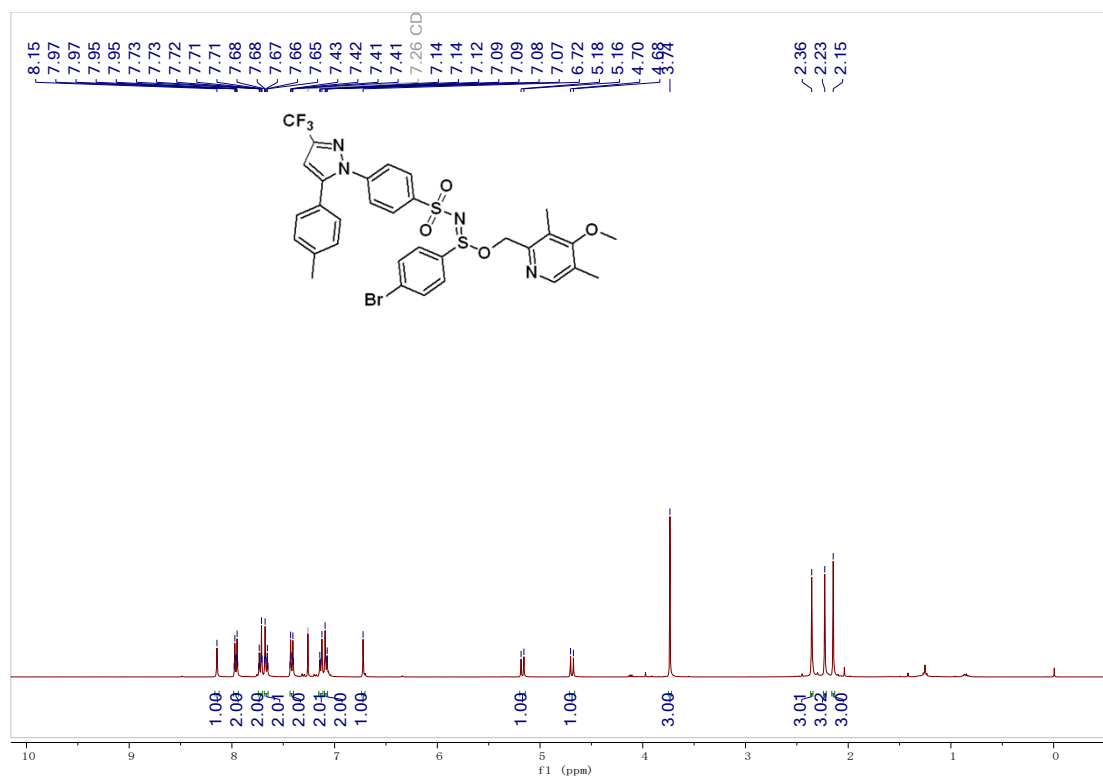

<sup>13</sup>C NMR (100 MHz, Chloroform-*d*) of compound **7d**

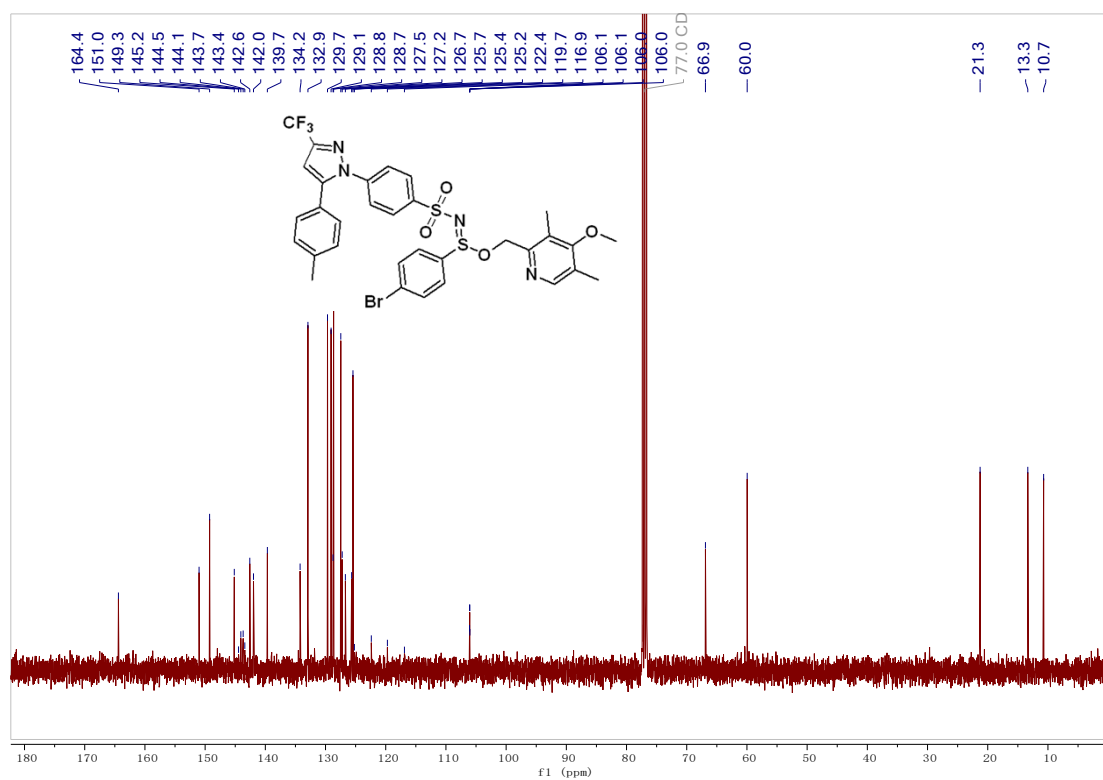

**<sup>19</sup>F NMR (376 MHz, Chloroform-d) of compound 7d**

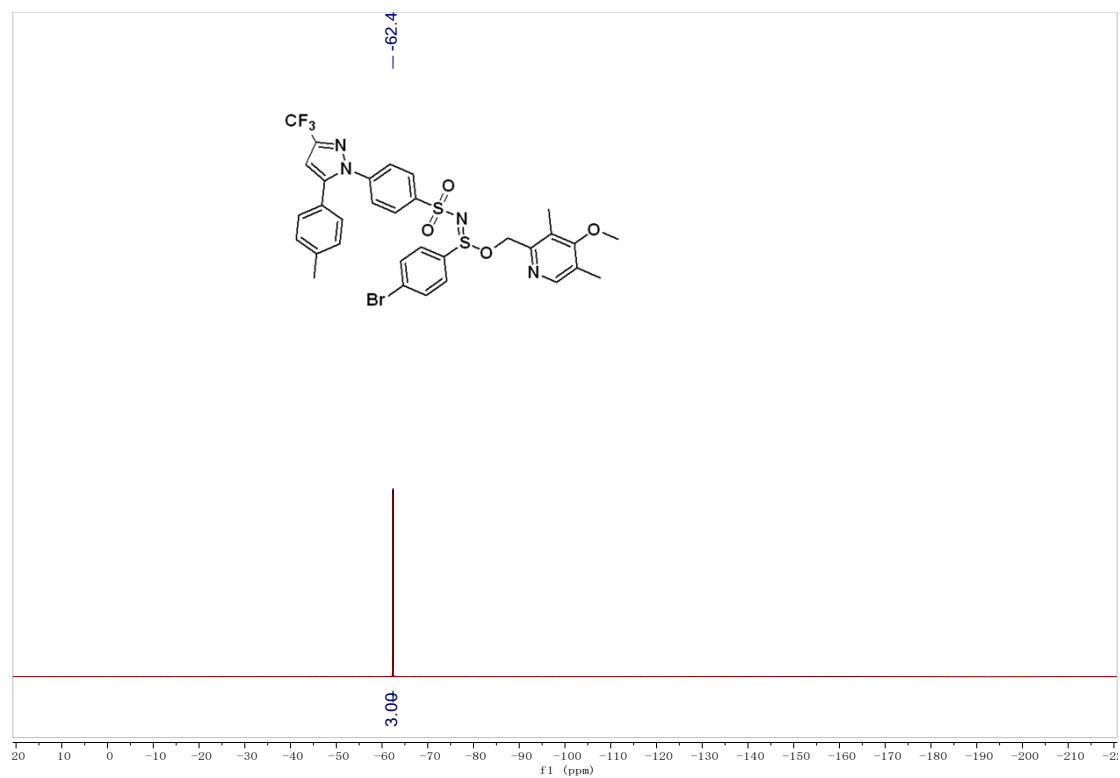

**<sup>1</sup>H NMR (400 MHz, Chloroform-d) of compound 7e**

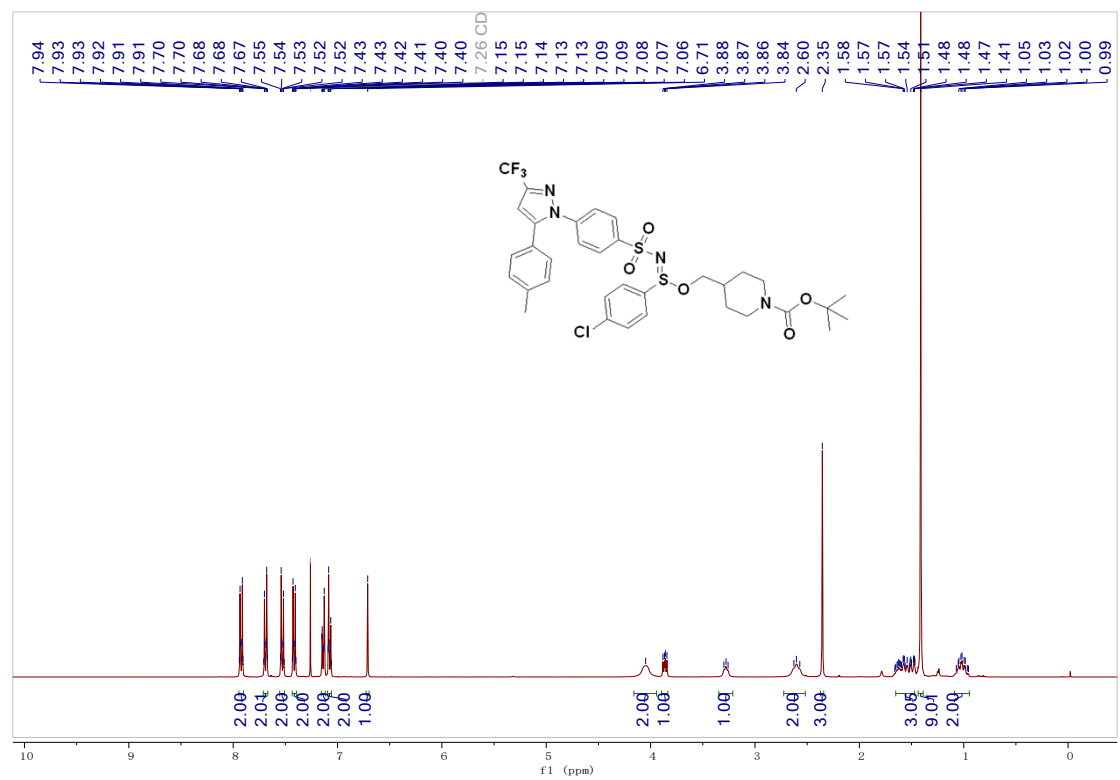

<sup>13</sup>C NMR (100 MHz, Chloroform-*d*) of compound **7e**

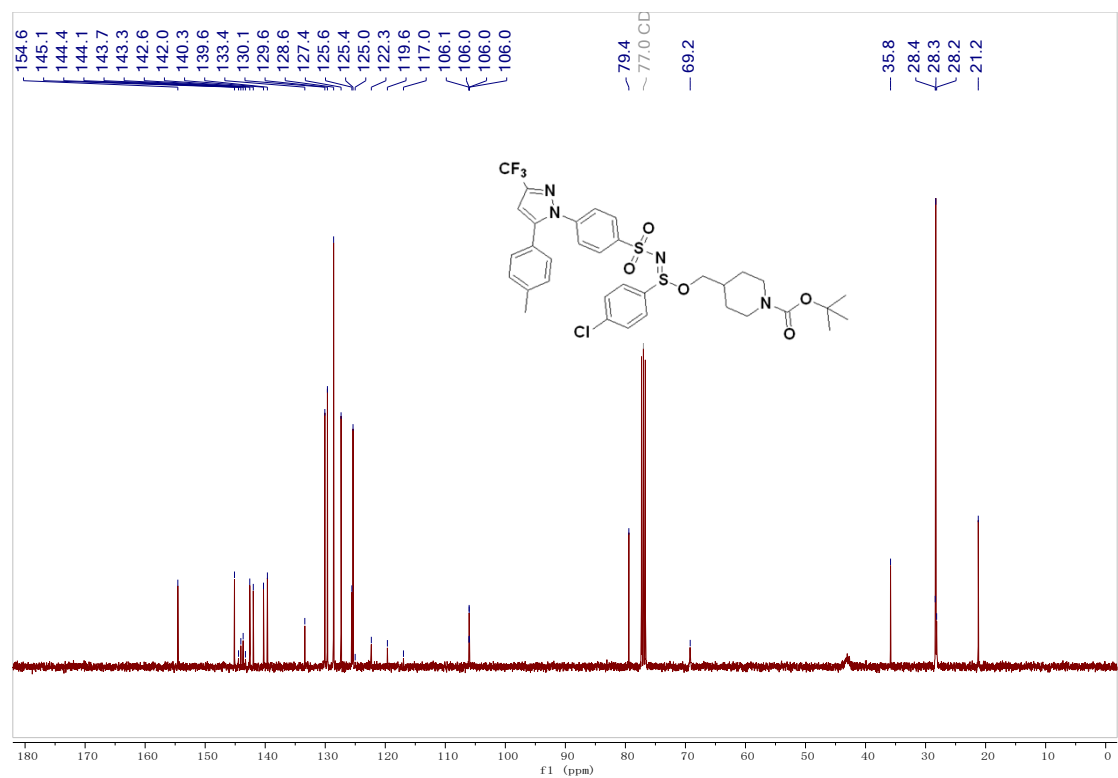

<sup>19</sup>F NMR (376 MHz, Chloroform-*d*) of compound **7e**

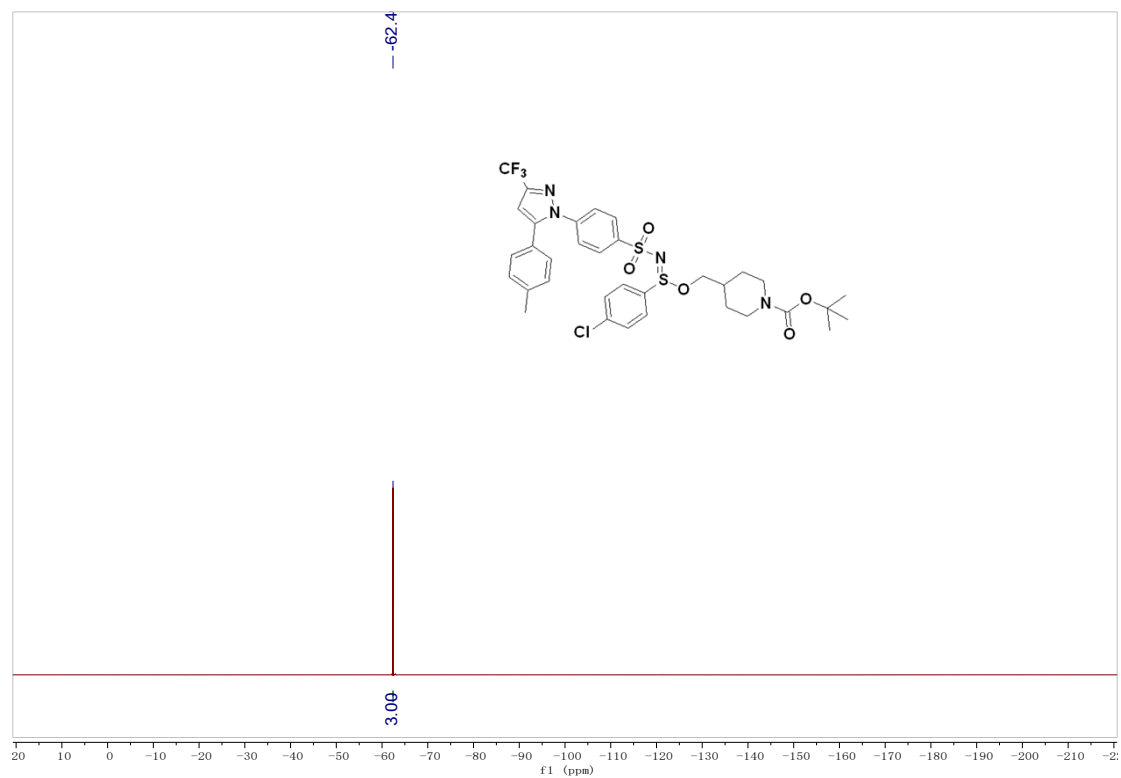

**<sup>1</sup>H NMR (400 MHz, Chloroform-*d*) of compound 7f**

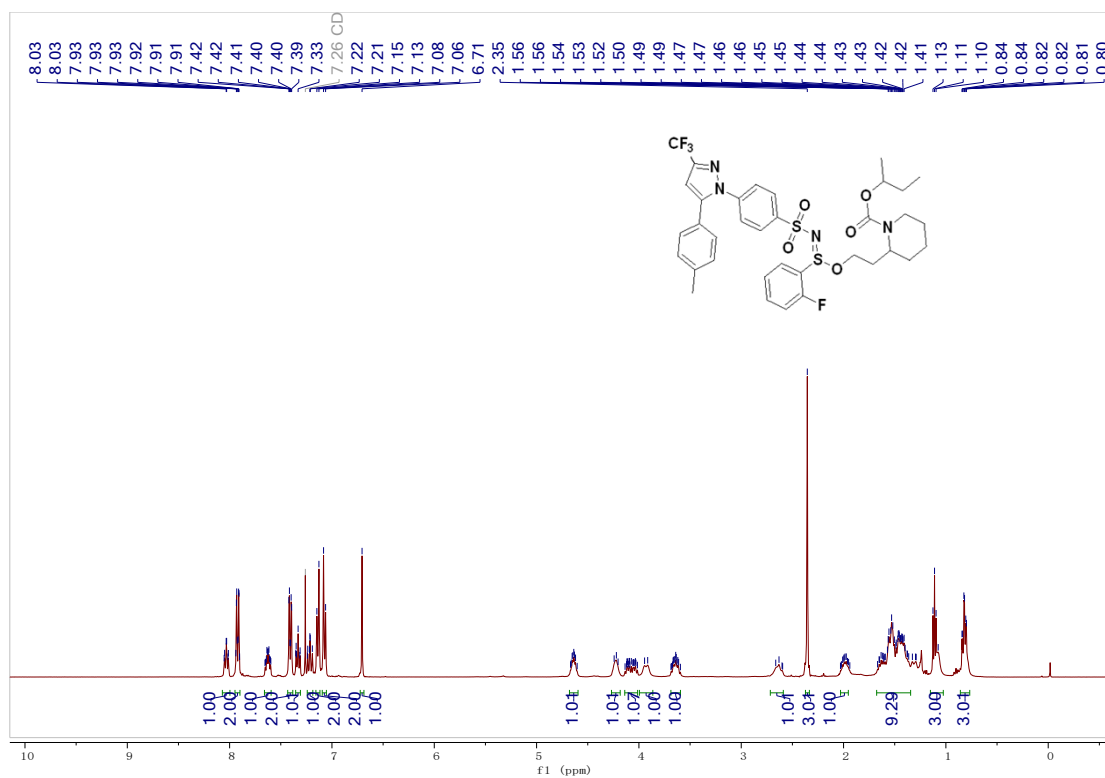

**<sup>13</sup>C NMR (100 MHz, Chloroform-*d*) of compound 7f**

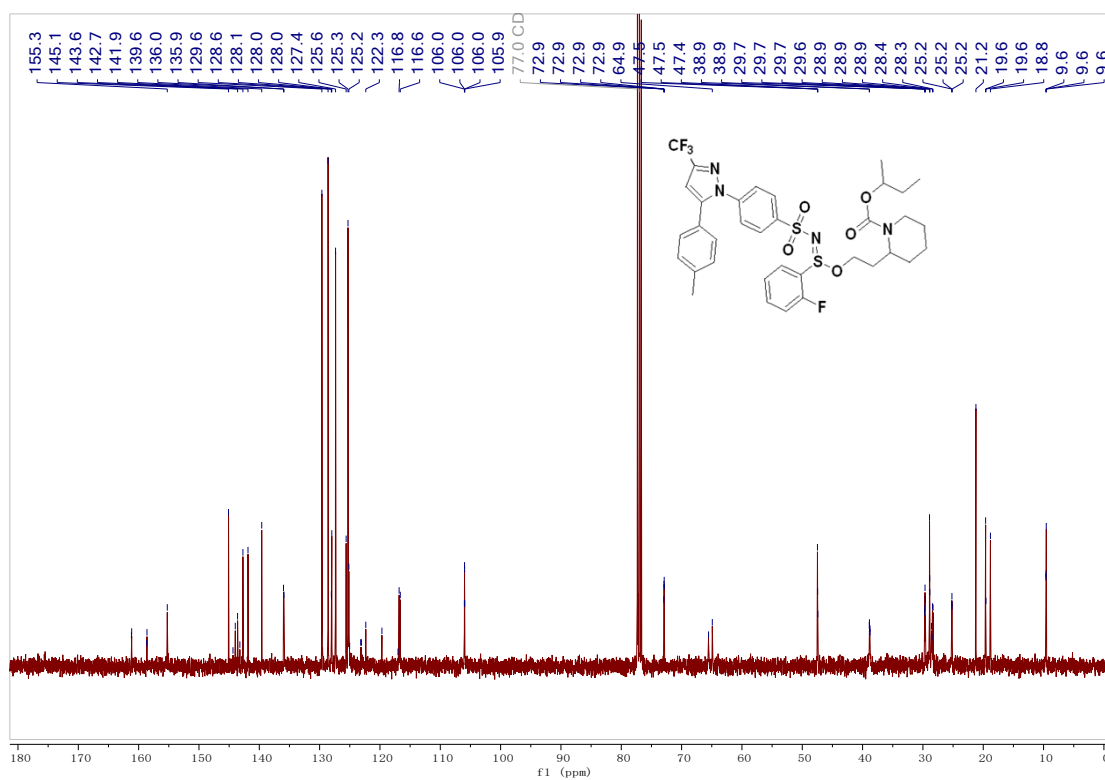

**<sup>19</sup>F NMR (376 MHz, Chloroform-d) of compound 7f**

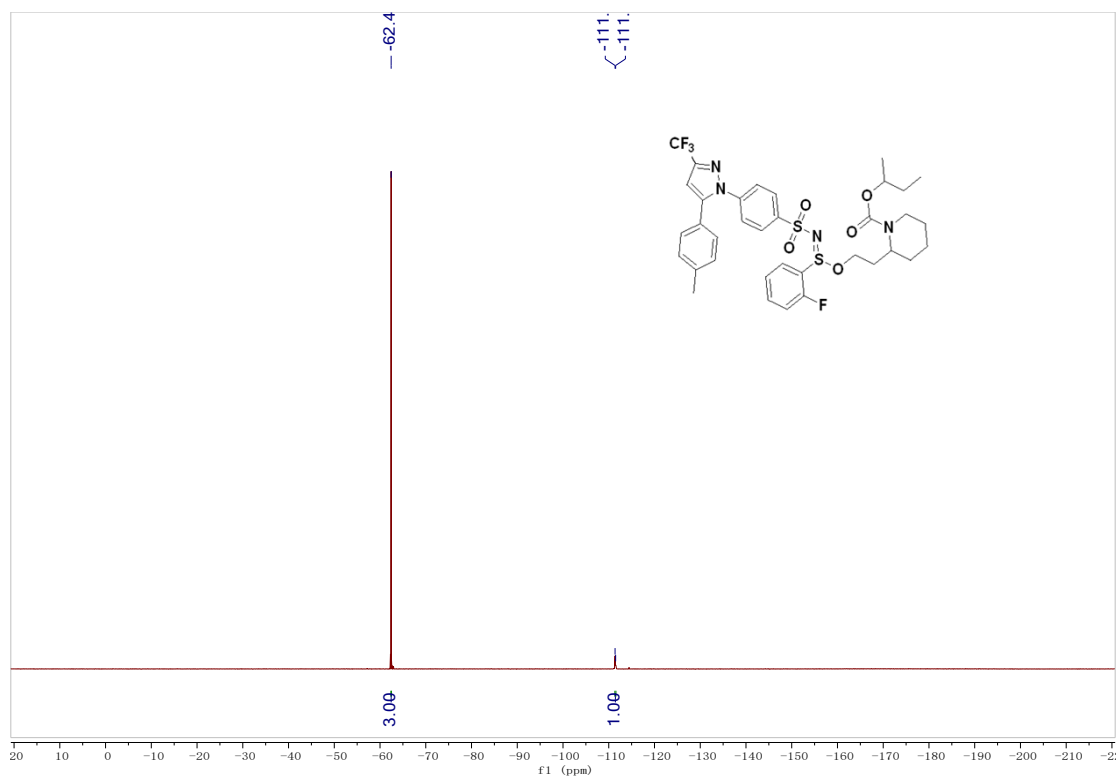

**<sup>1</sup>H NMR (400 MHz, Chloroform-d) of compound 7g**

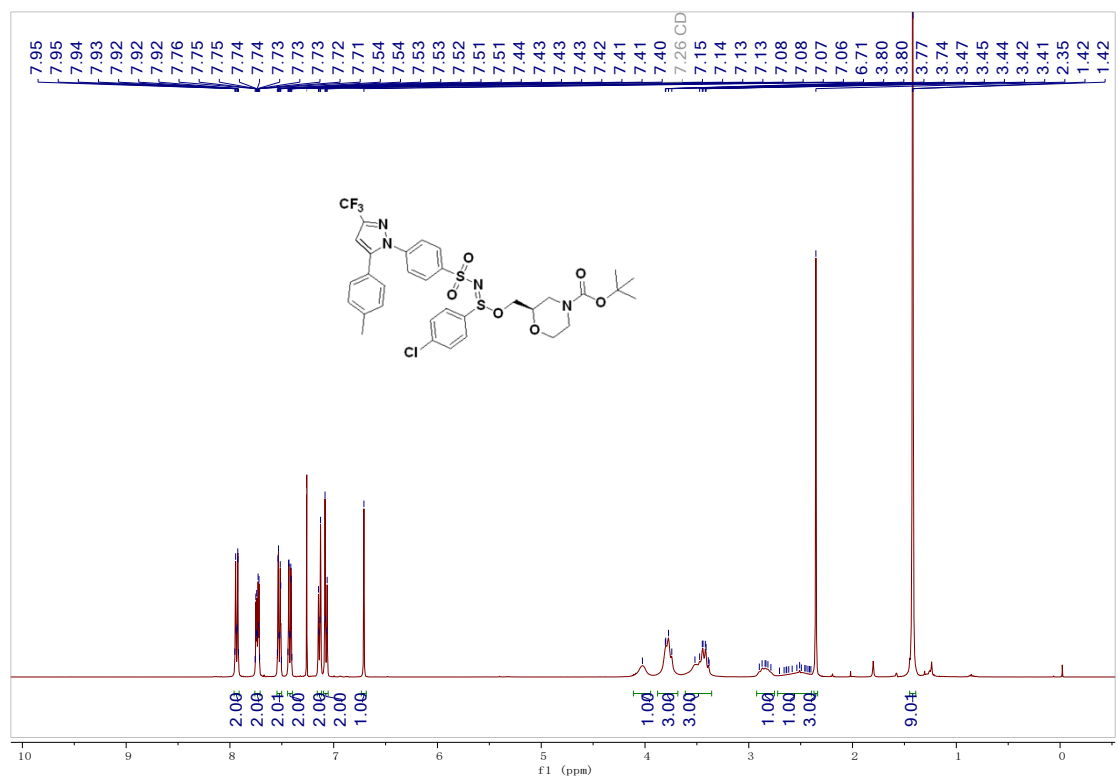

<sup>13</sup>C NMR (100 MHz, Chloroform-*d*) of compound **7g**

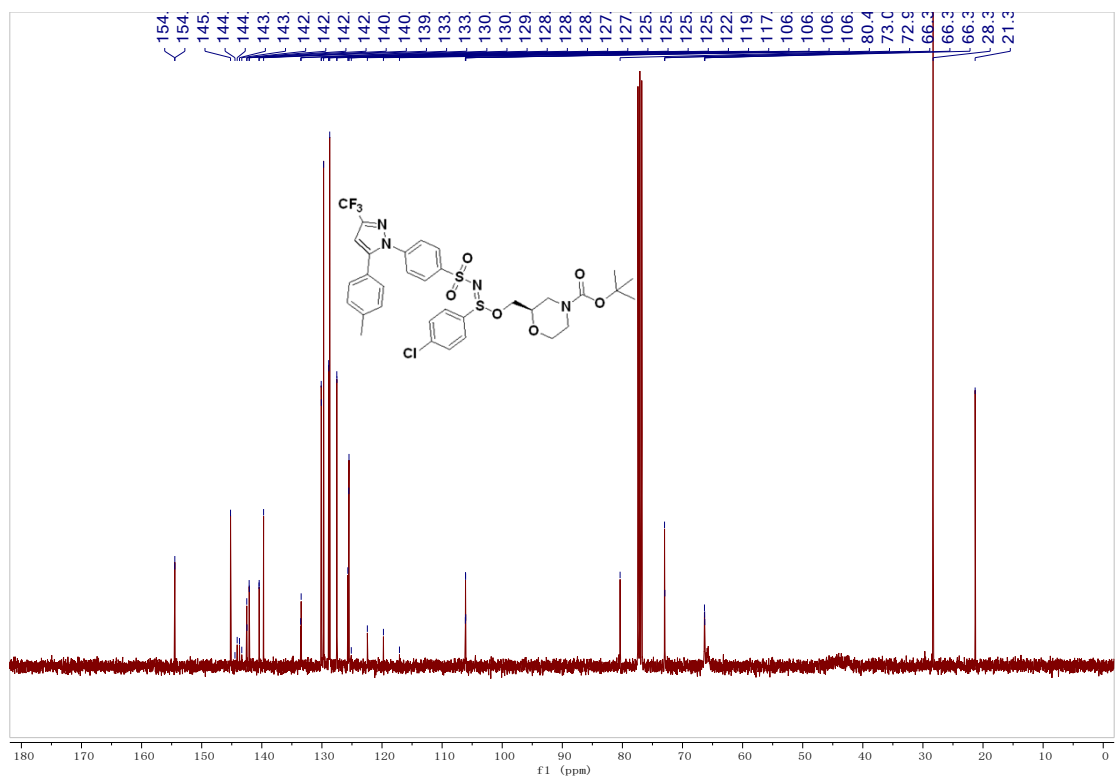

<sup>19</sup>F NMR (376 MHz, Chloroform-*d*) of compound **7g**

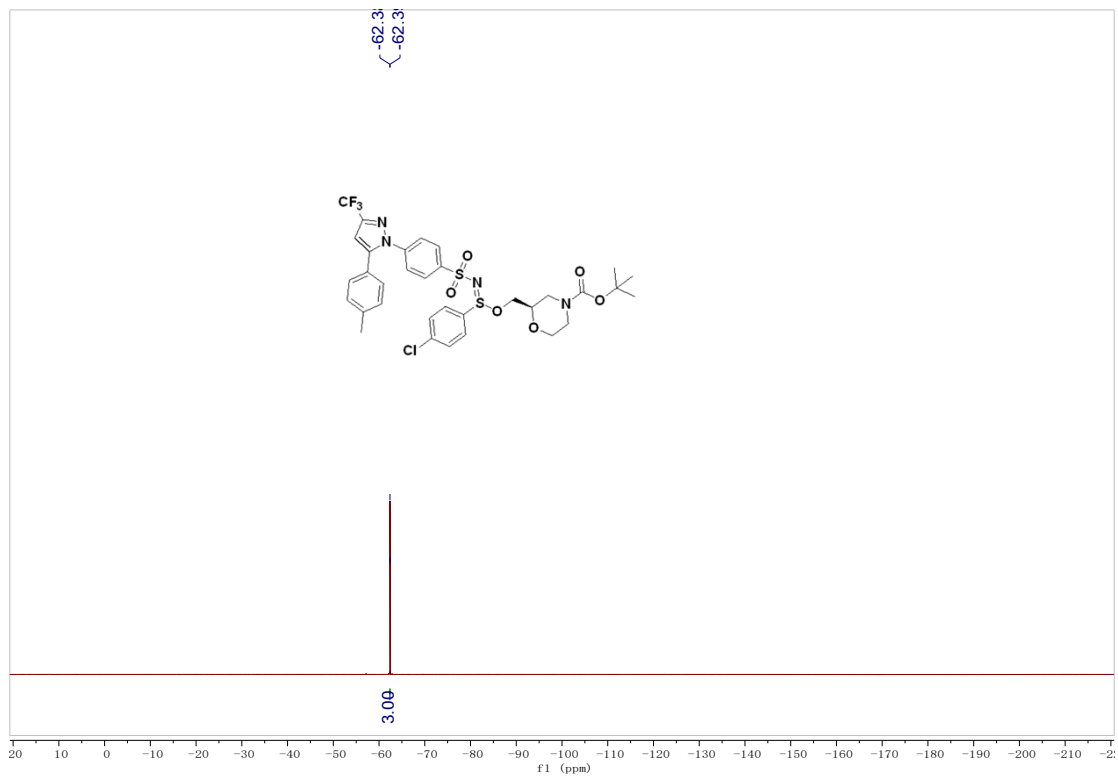

**<sup>1</sup>H NMR (400 MHz, Chloroform-*d*) of compound 7h**

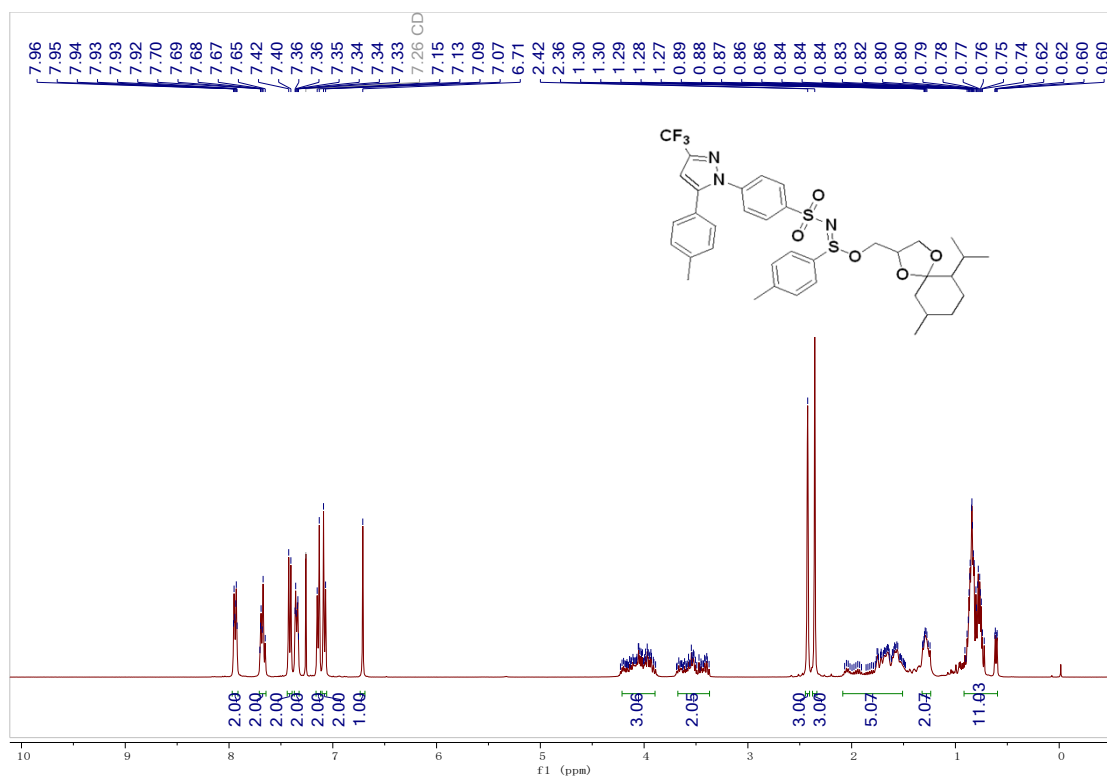

**<sup>13</sup>C NMR (100 MHz, Chloroform-*d*) of compound 7h**

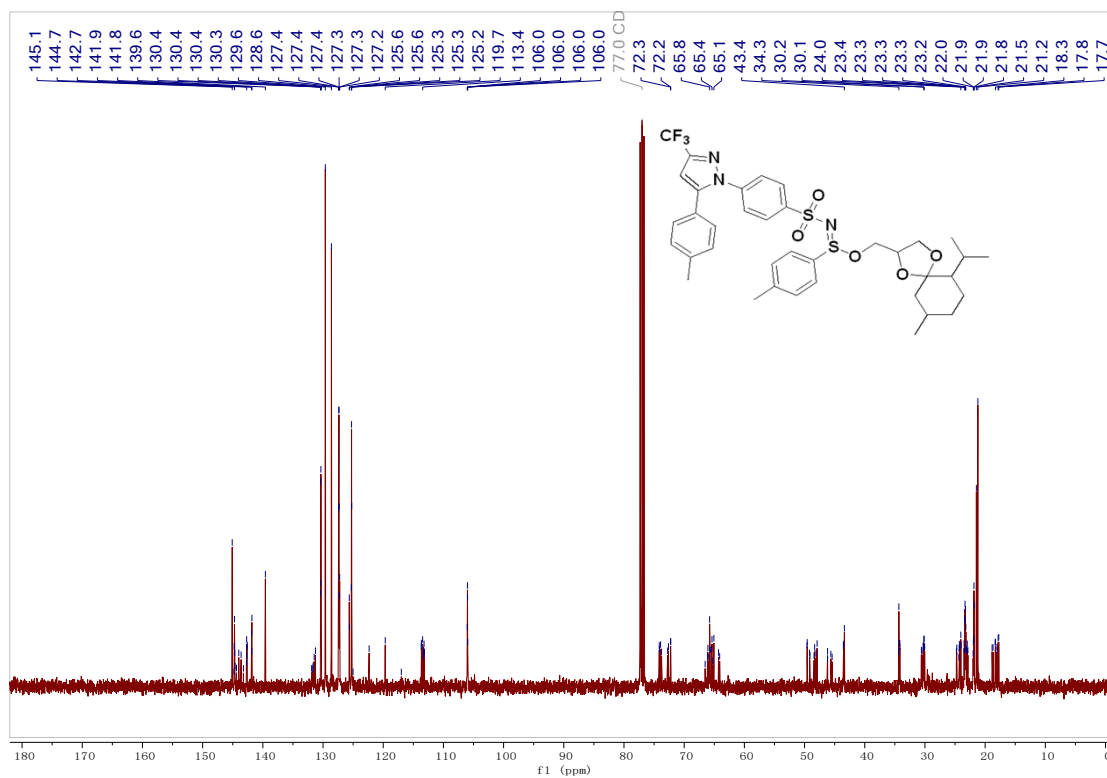

**<sup>19</sup>F NMR (376 MHz, Chloroform-*d*) of compound 7h**

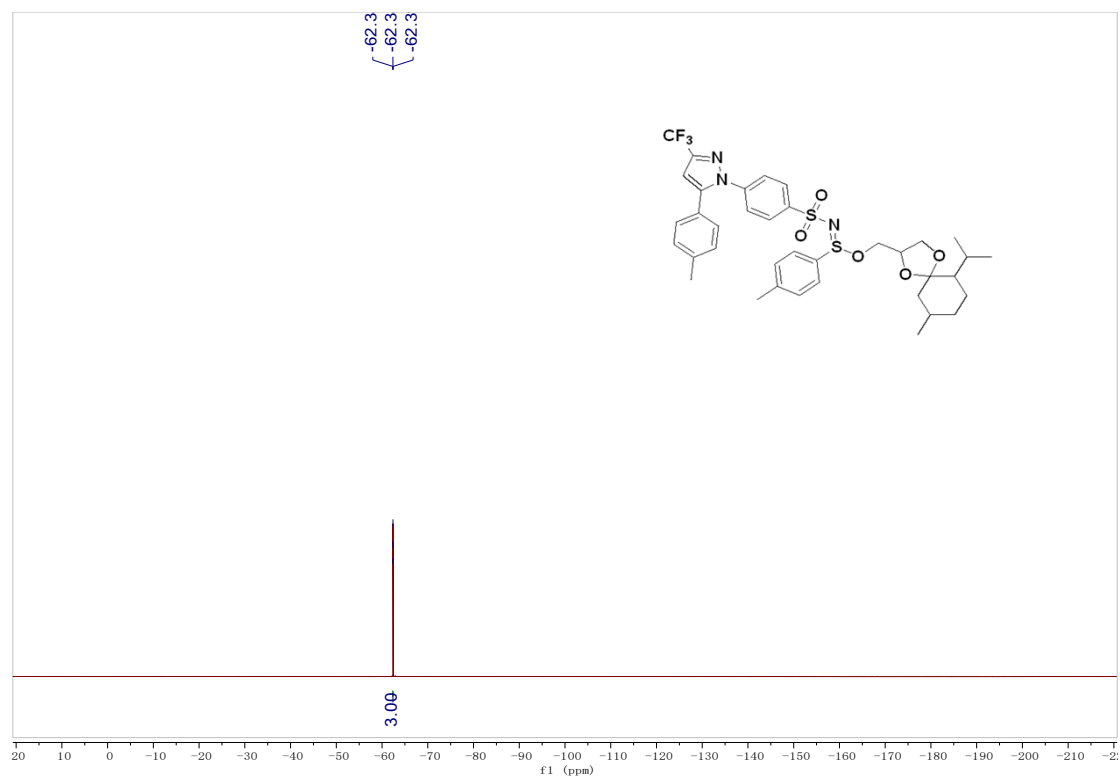

**<sup>1</sup>H NMR (400 MHz, Chloroform-*d*) of compound 8a**

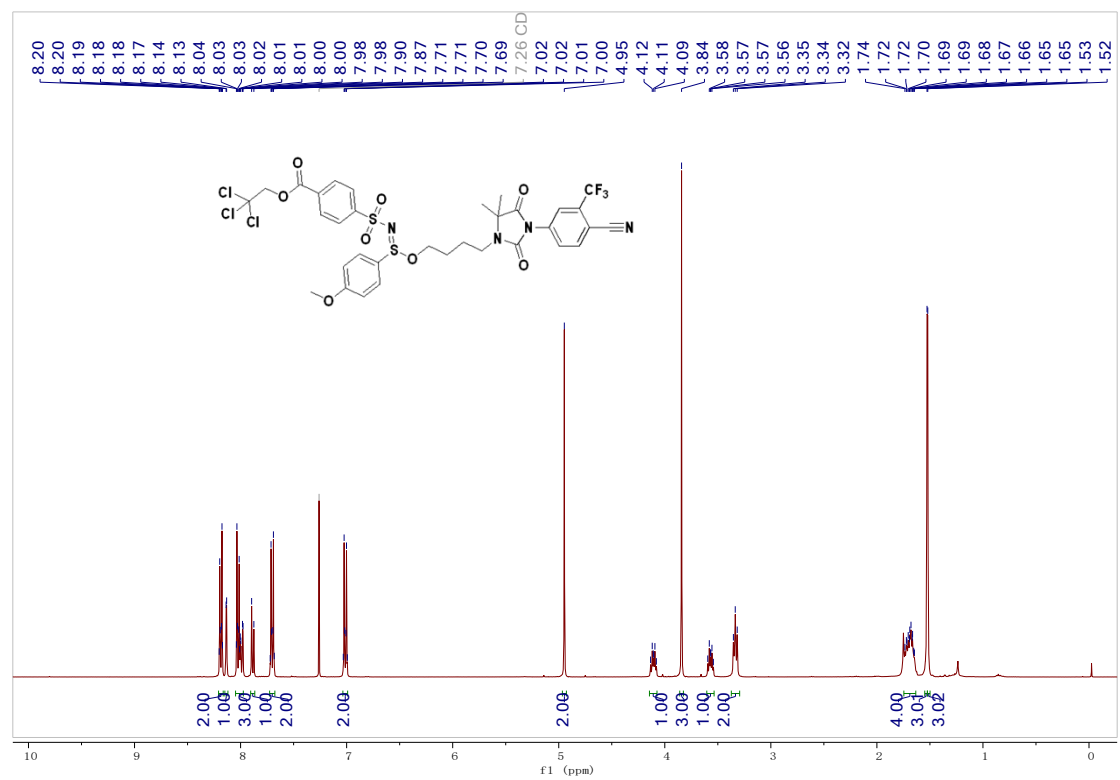



<sup>13</sup>C NMR (100 MHz, Chloroform-*d*) of compound **8a**

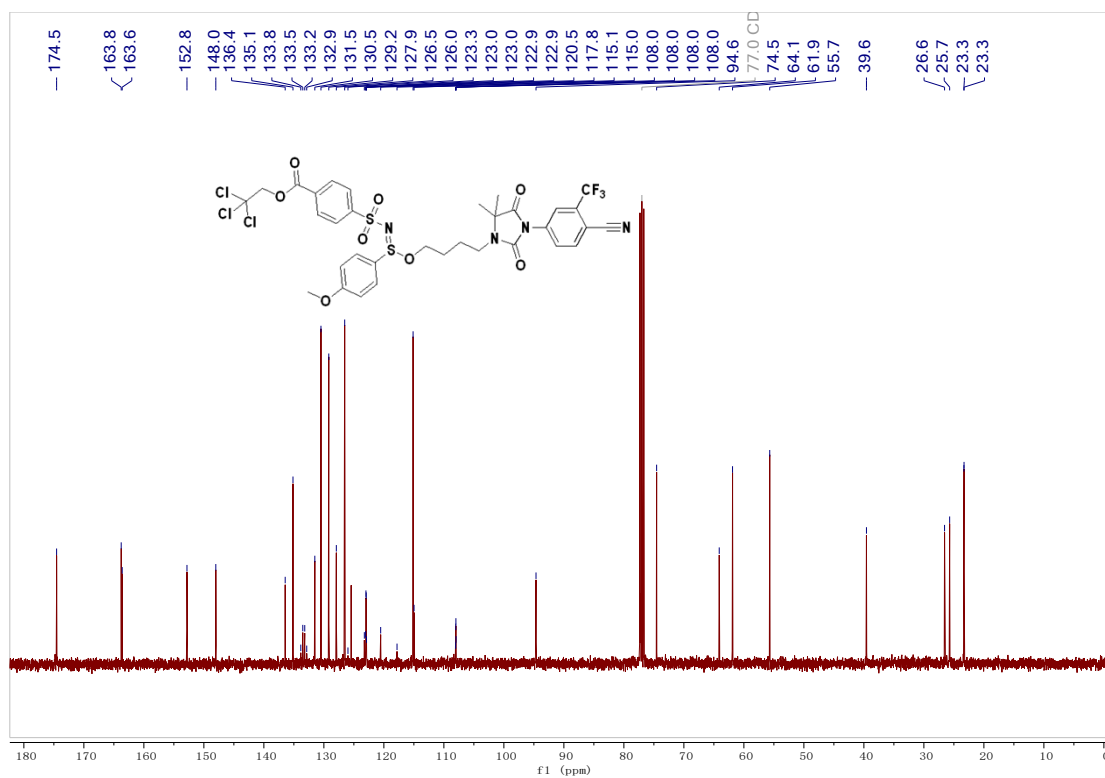

<sup>19</sup>F NMR (376 MHz, Chloroform-*d*) of compound **8a**

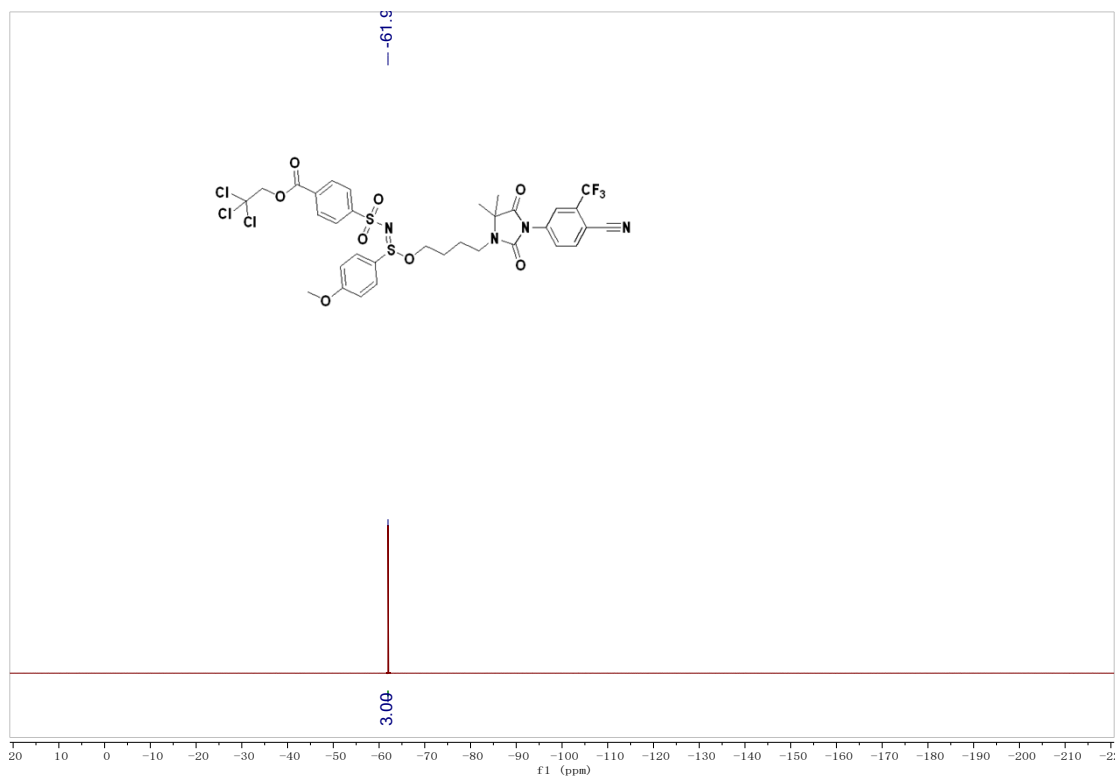

<sup>1</sup>H NMR (400 MHz, Chloroform-*d*) of compound **8b**

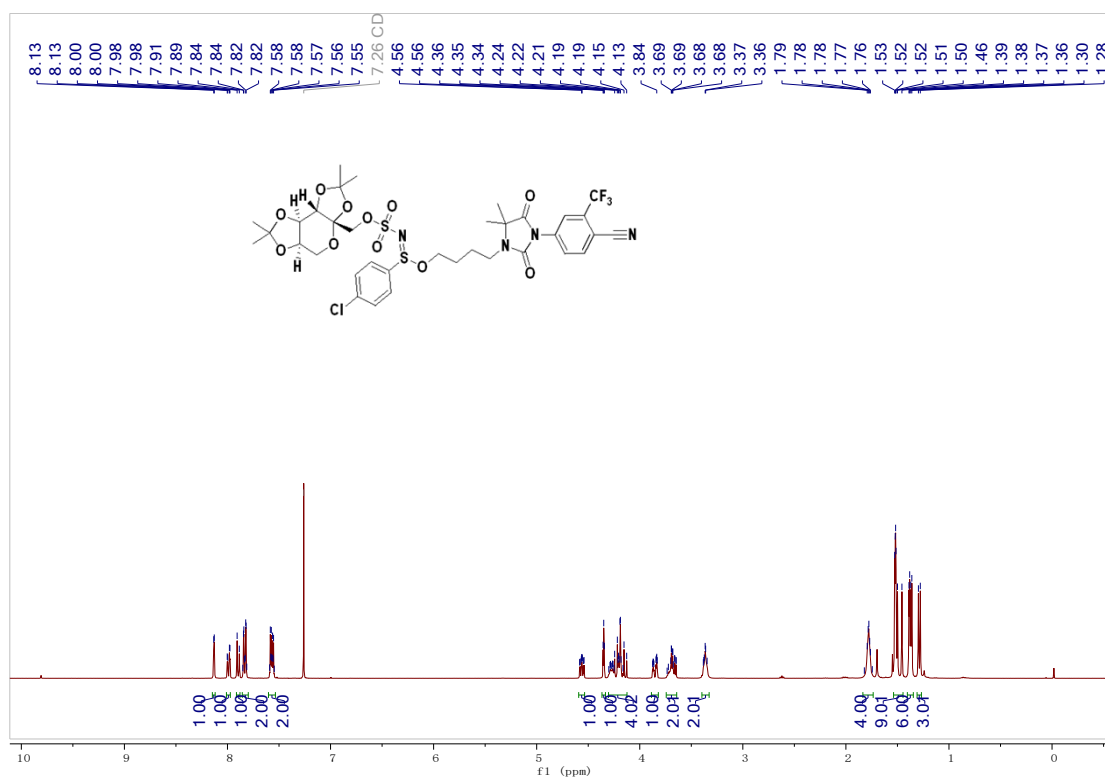

<sup>13</sup>C NMR (100 MHz, Chloroform-*d*) of compound **8b**

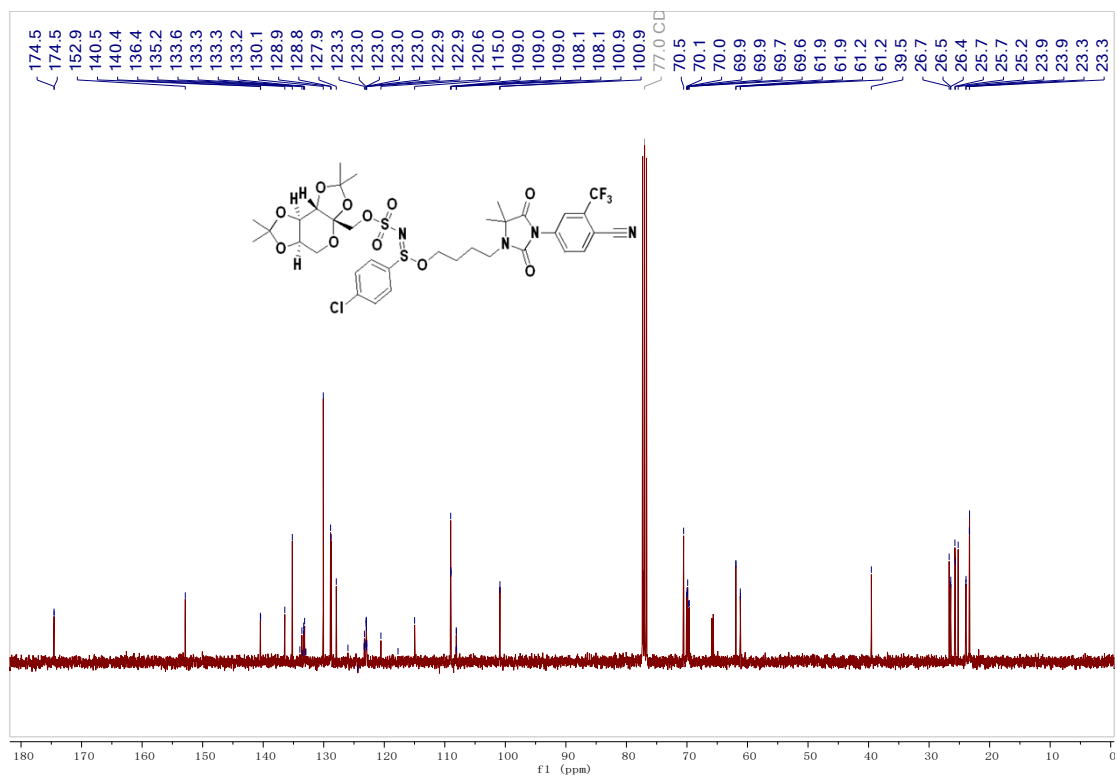

**<sup>13</sup>C NMR (376 MHz, Chloroform-*d*) of compound 8b**

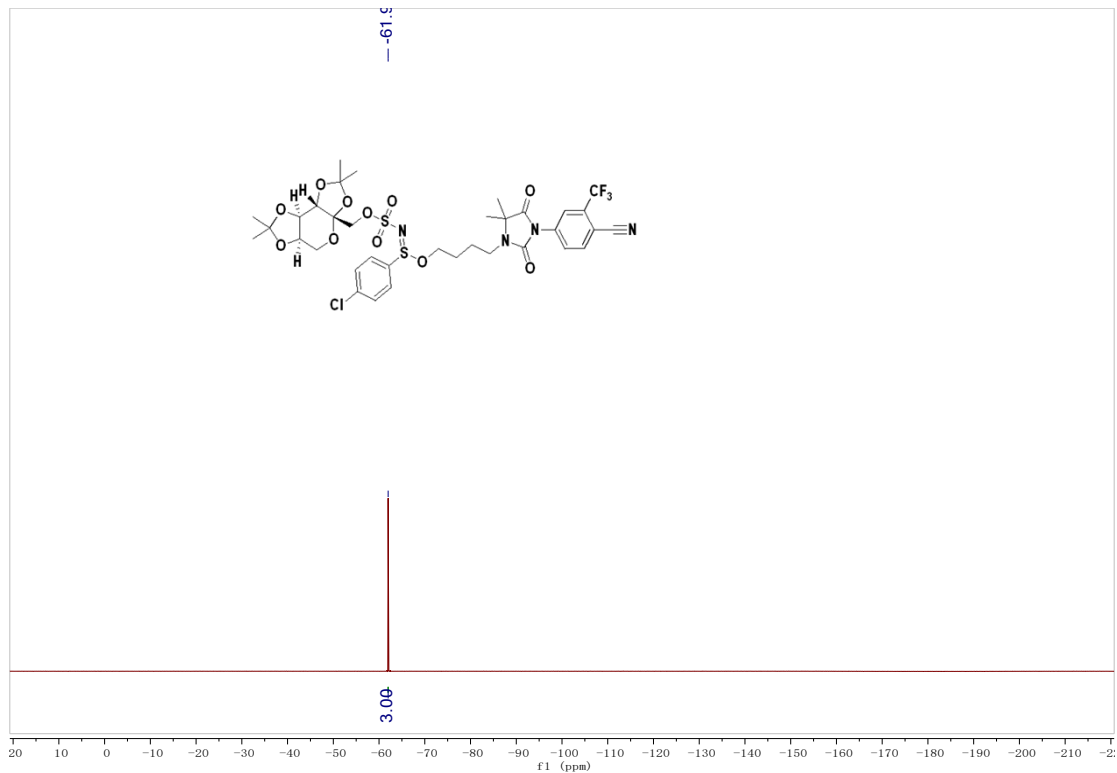

**<sup>1</sup>H NMR (400 MHz, Chloroform-*d*) of compound 8c**

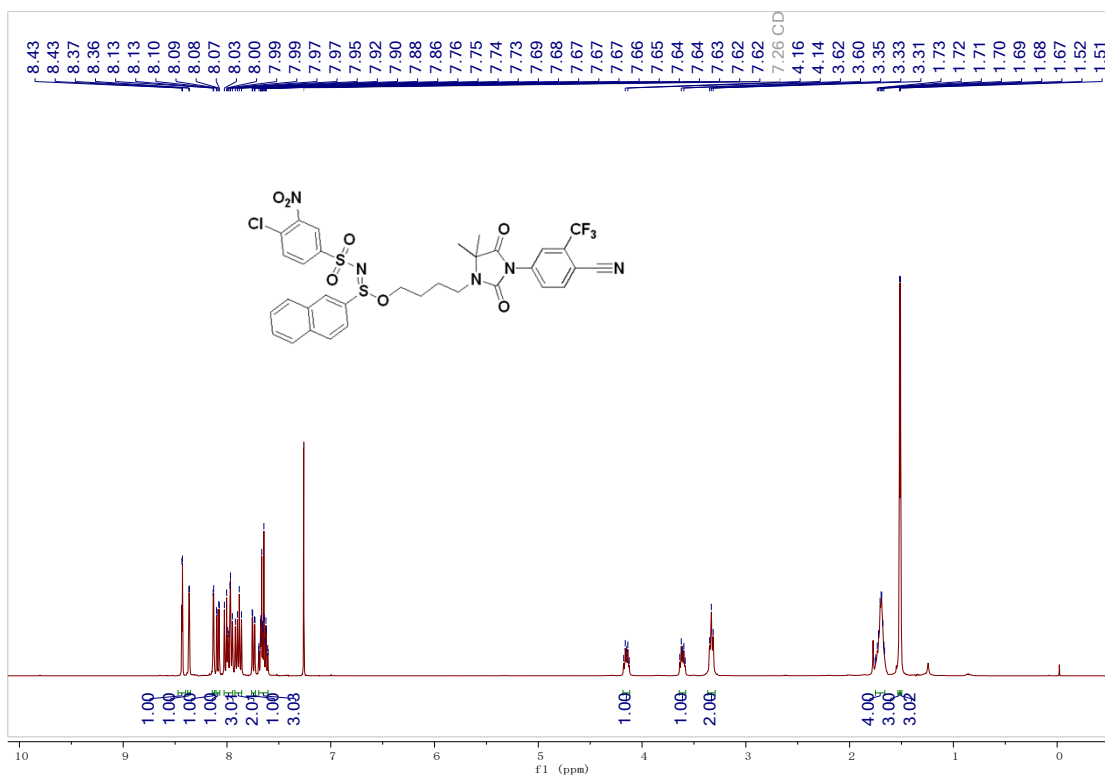

**<sup>13</sup>C NMR (100 MHz, Chloroform-*d*) of compound 8c**

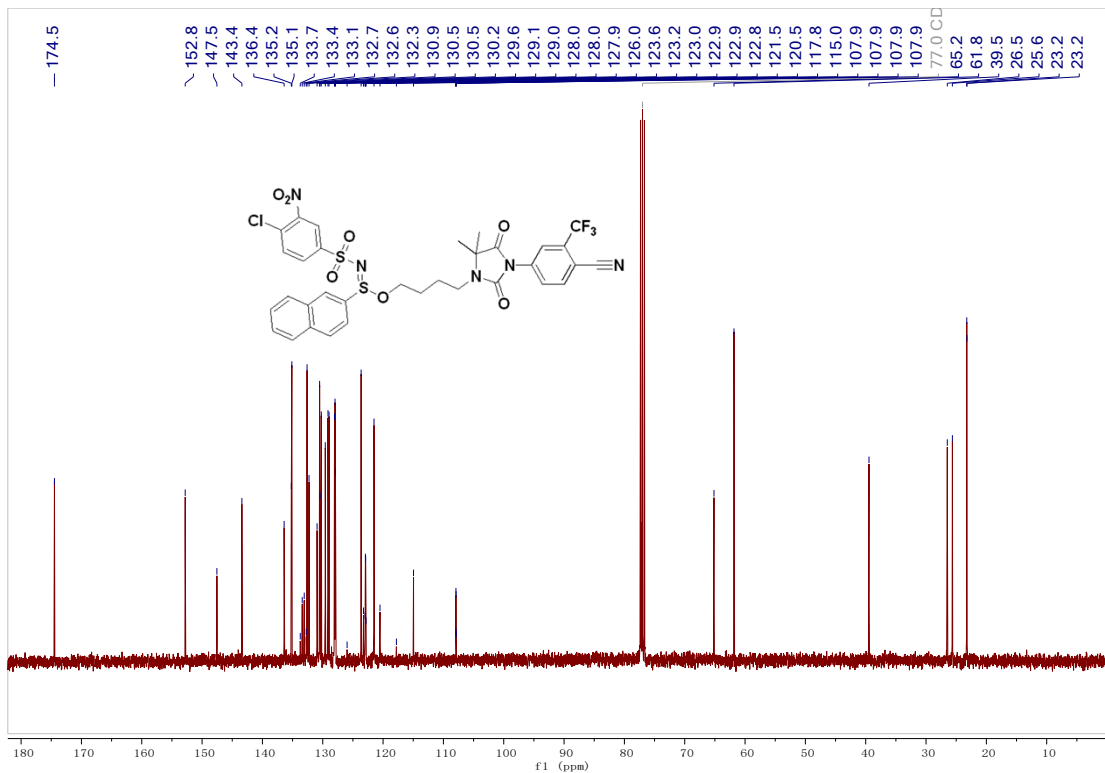

**<sup>19</sup>F NMR (376 MHz, Chloroform-*d*) of compound 8c**

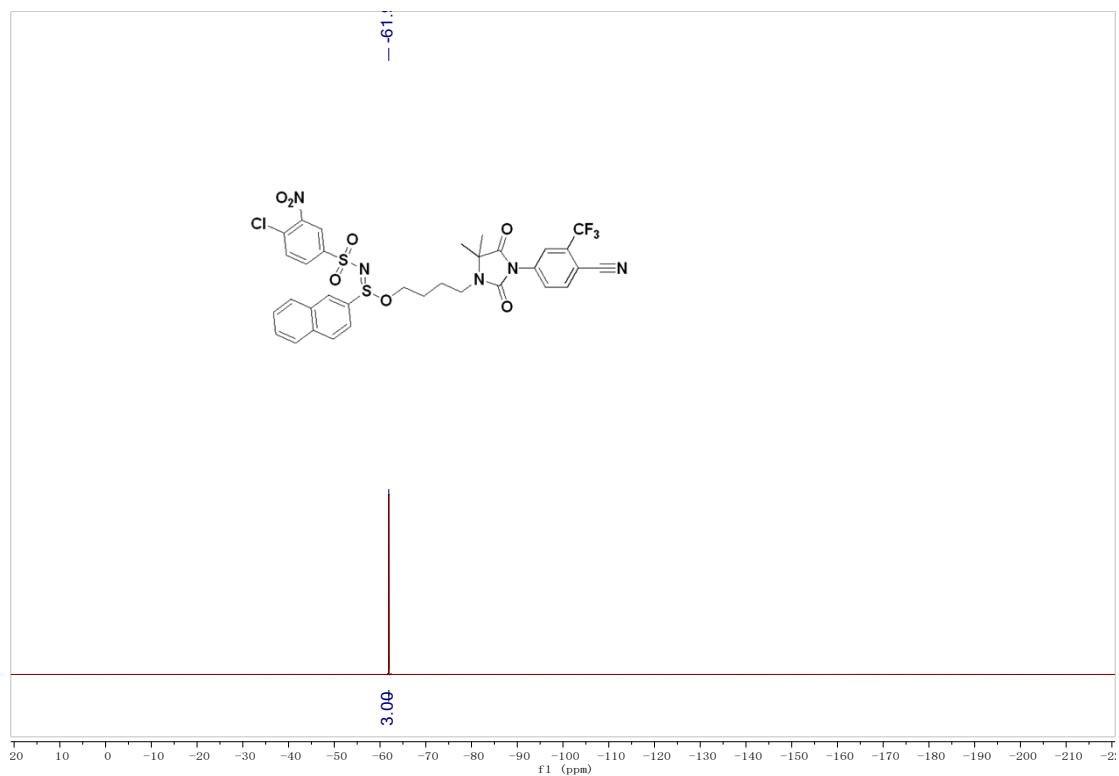

<sup>1</sup>H NMR (400 MHz, Chloroform-*d*) of compound 8d

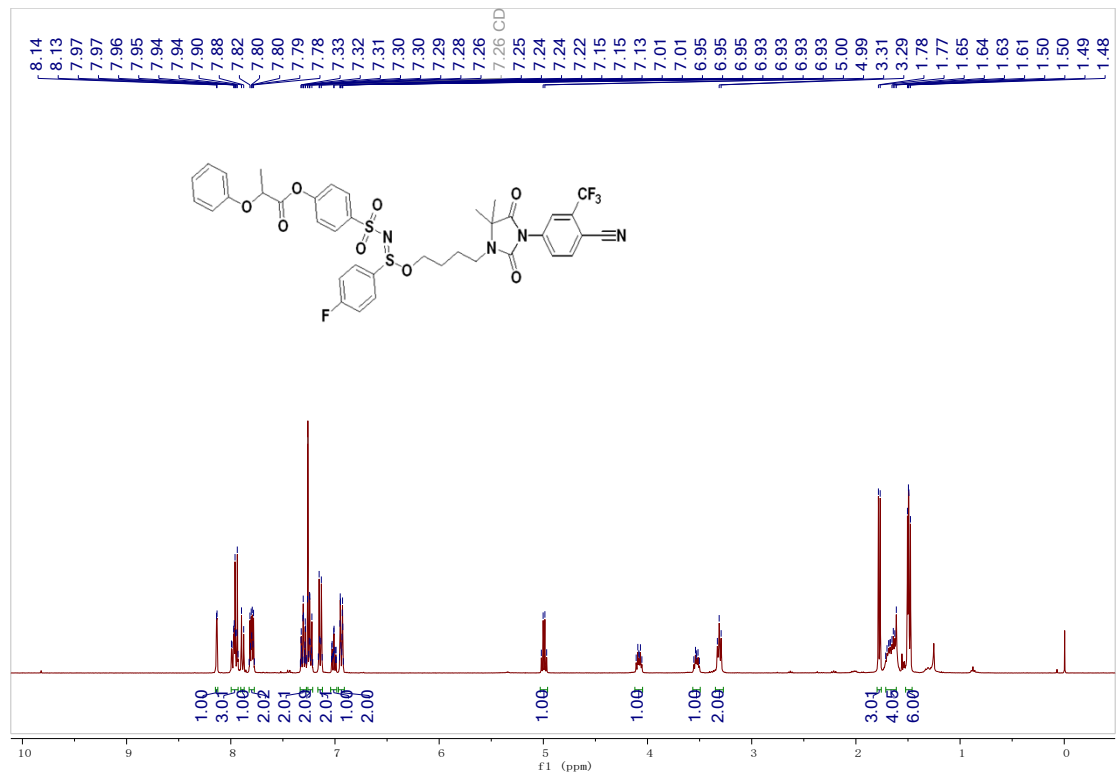

<sup>13</sup>C NMR (100 MHz, Chloroform-*d*) of compound 8d

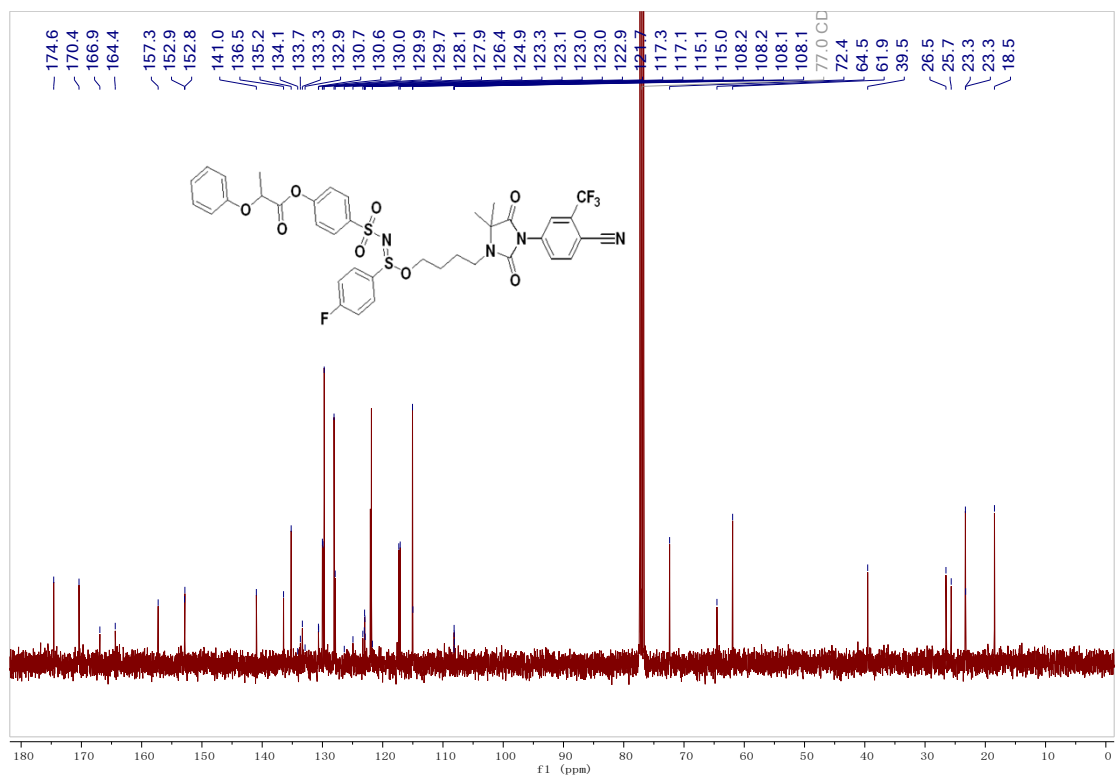

<sup>19</sup>F NMR (376 MHz, Chloroform-*d*) of compound **8d**

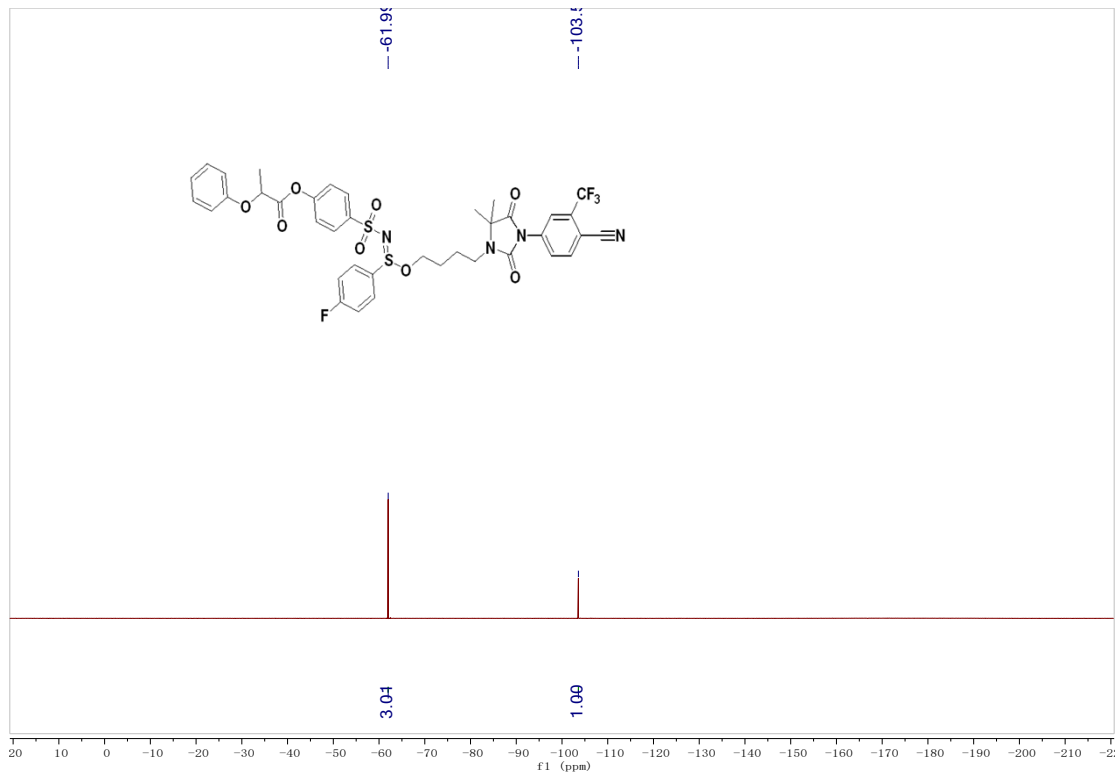

<sup>1</sup>H NMR (400 MHz, Chloroform-*d*) of compound **8e**

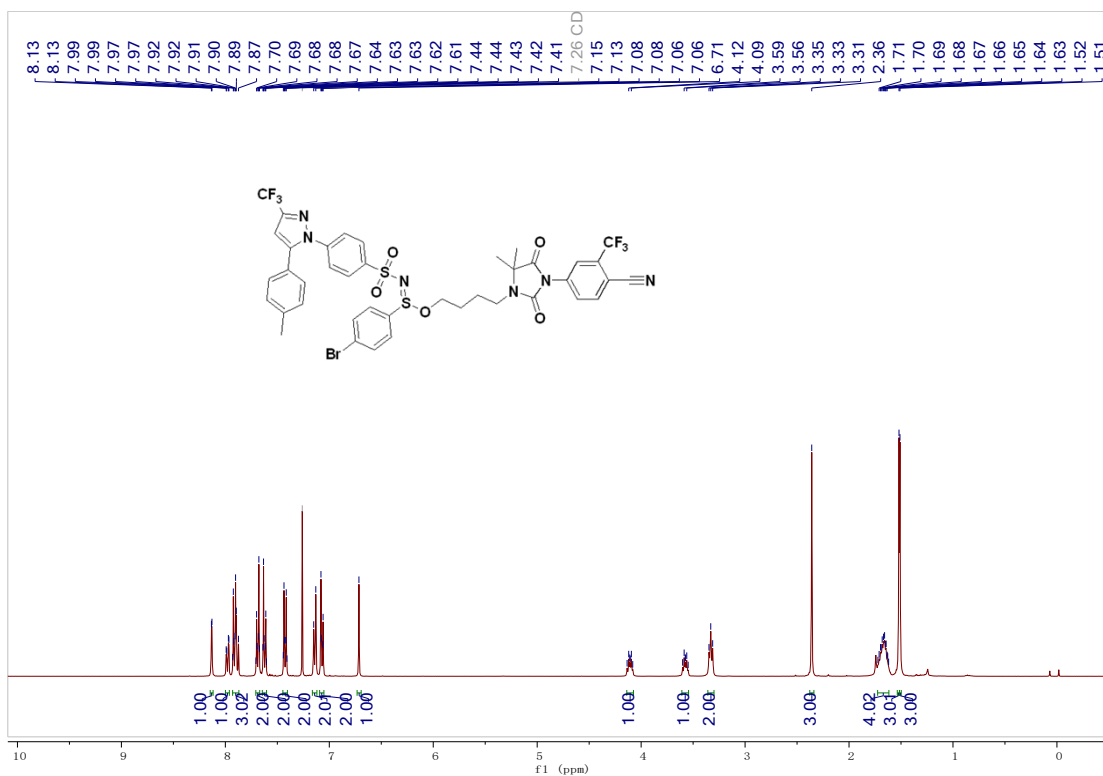

**<sup>13</sup>C NMR (100 MHz, Chloroform-*d*) of compound 8e**

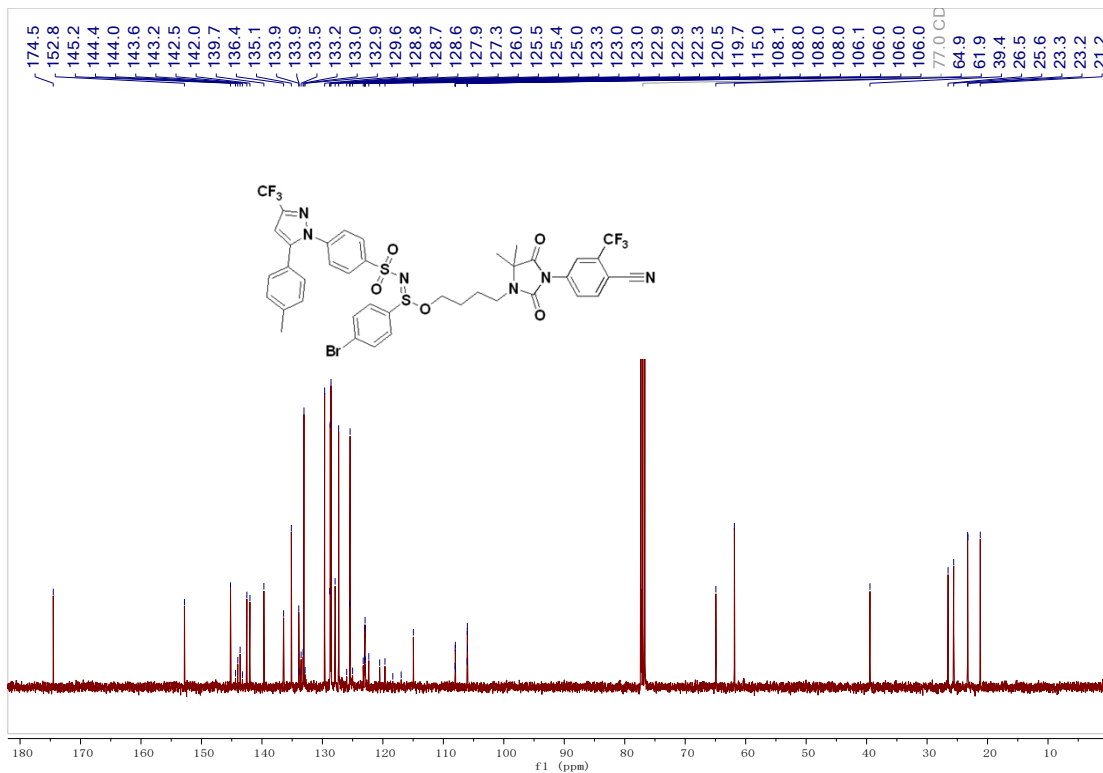

**<sup>19</sup>F NMR (376 MHz, Chloroform-*d*) of compound 8e**

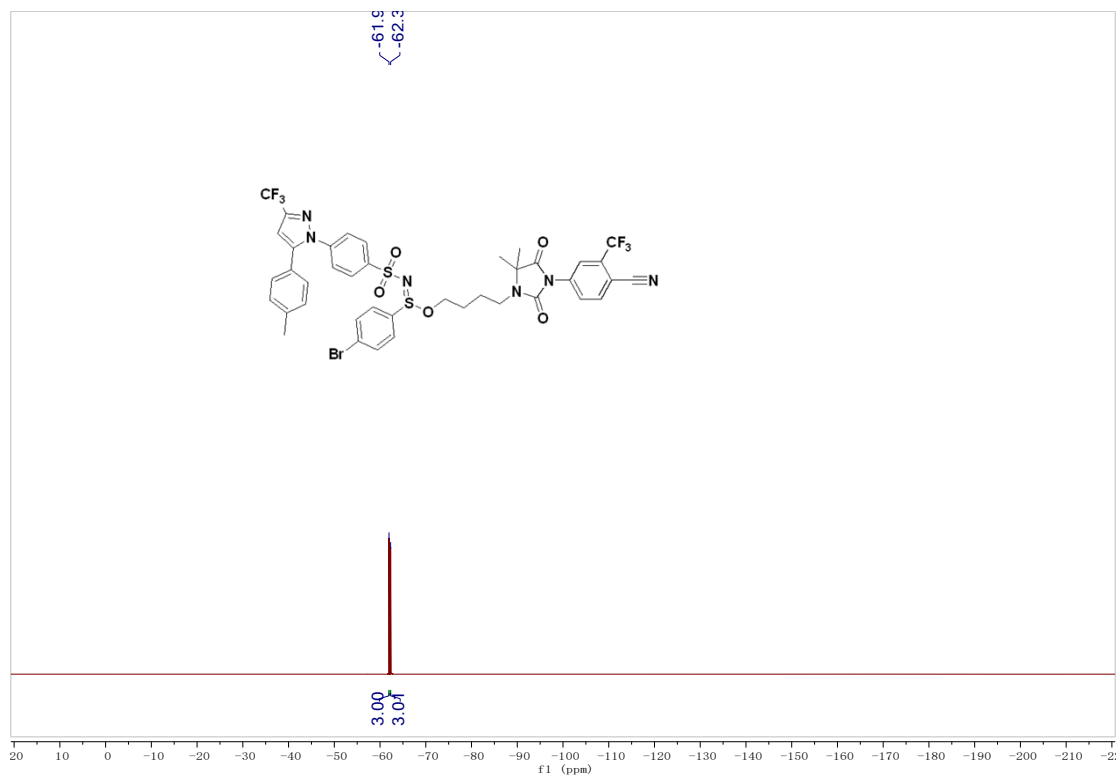





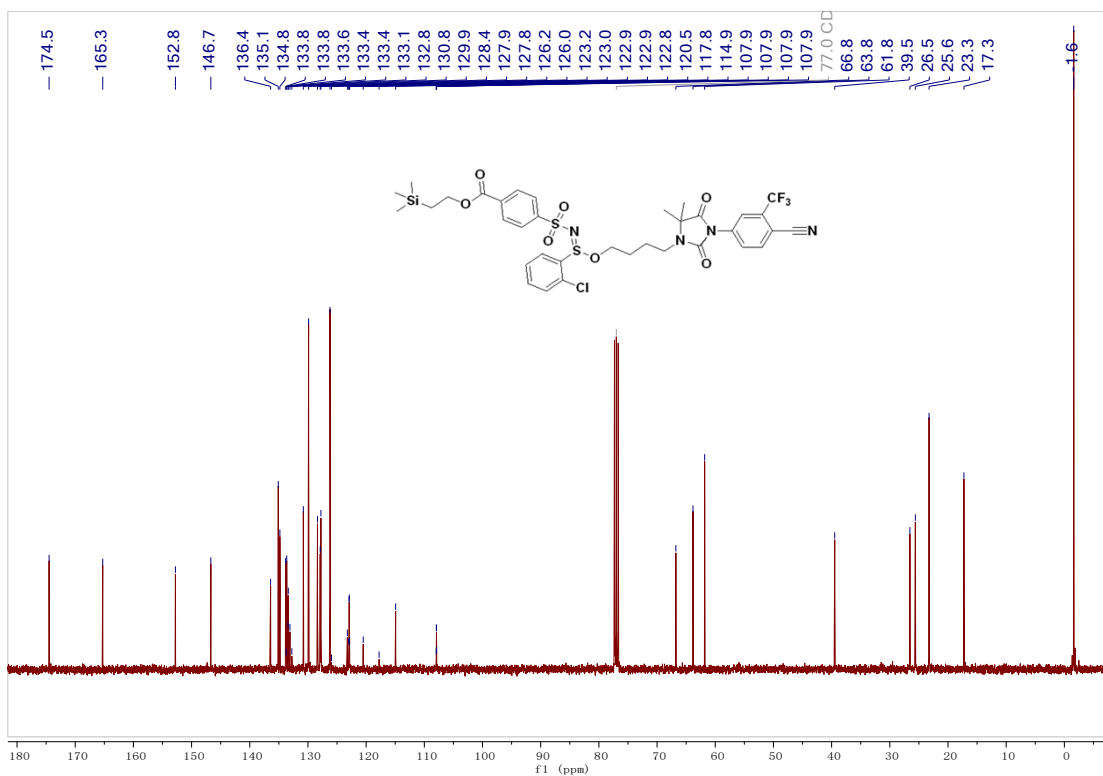

<sup>19</sup>F NMR (376 MHz, Chloroform-d) of compound 8f

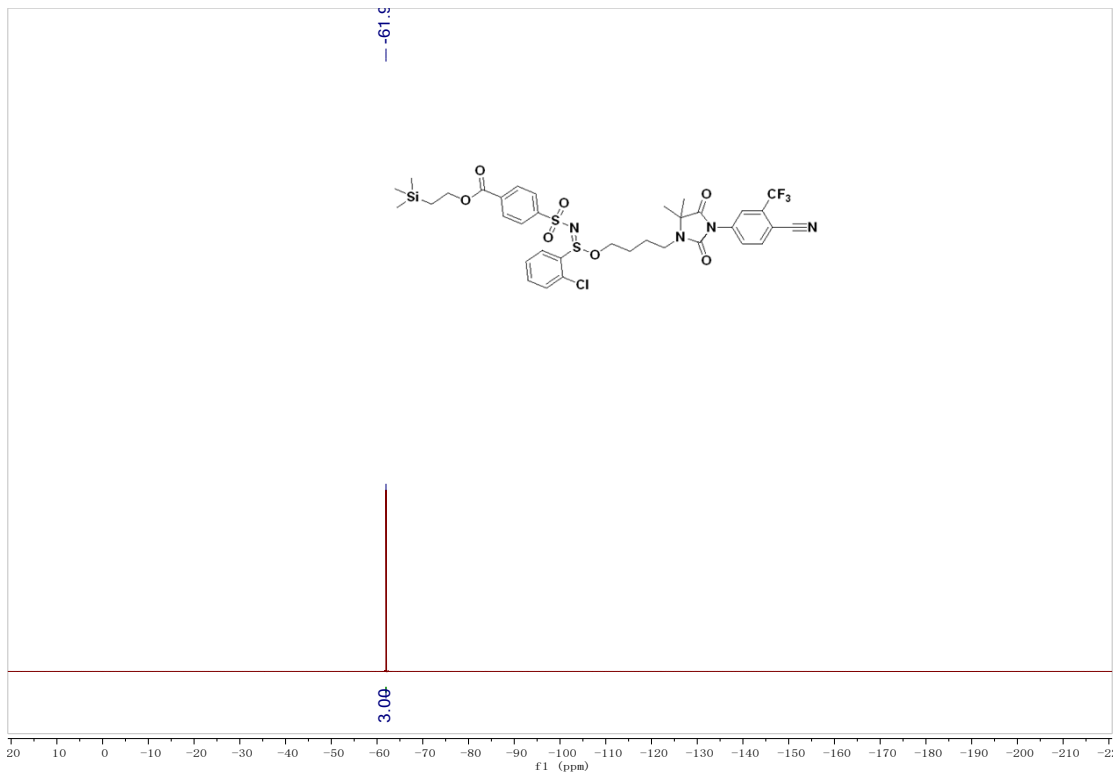

<sup>1</sup>H NMR (400 MHz, Chloroform-d) of compound 8g

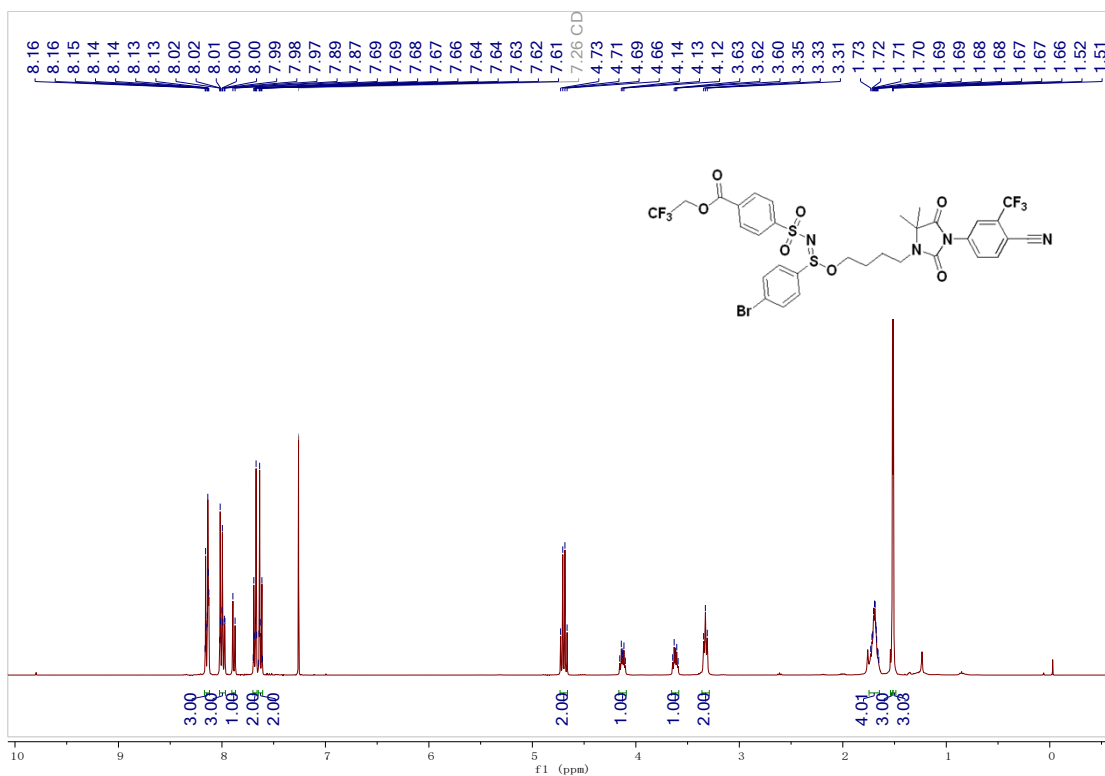

**<sup>13</sup>C NMR (100 MHz, Chloroform-*d*) of compound 8g**

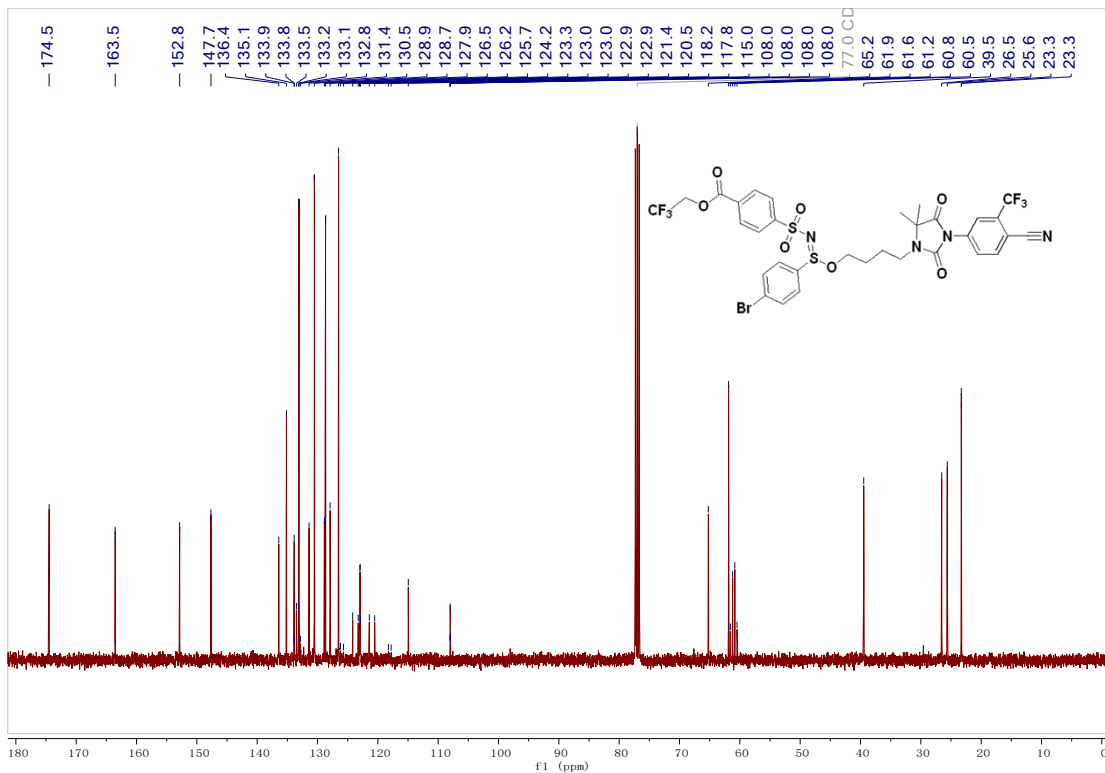

**<sup>19</sup>F NMR (376 MHz, Chloroform-*d*) of compound 8g**

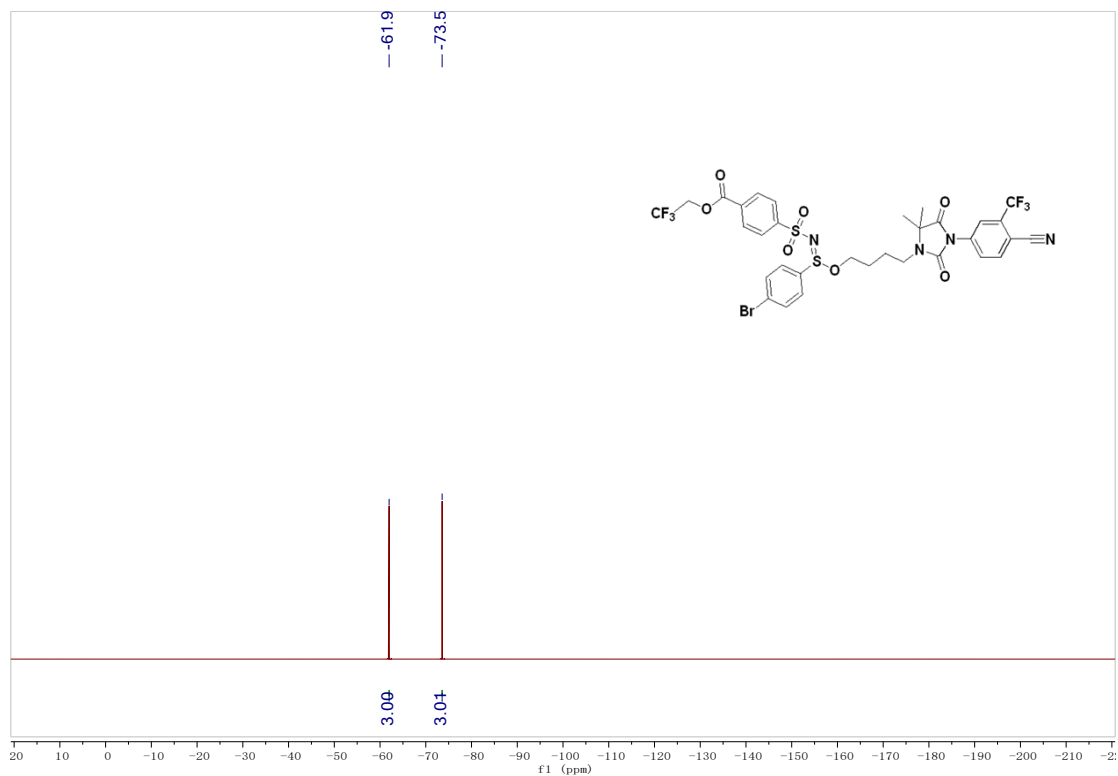

<sup>1</sup>H NMR (400 MHz, Chloroform-*d*) of compound 8h

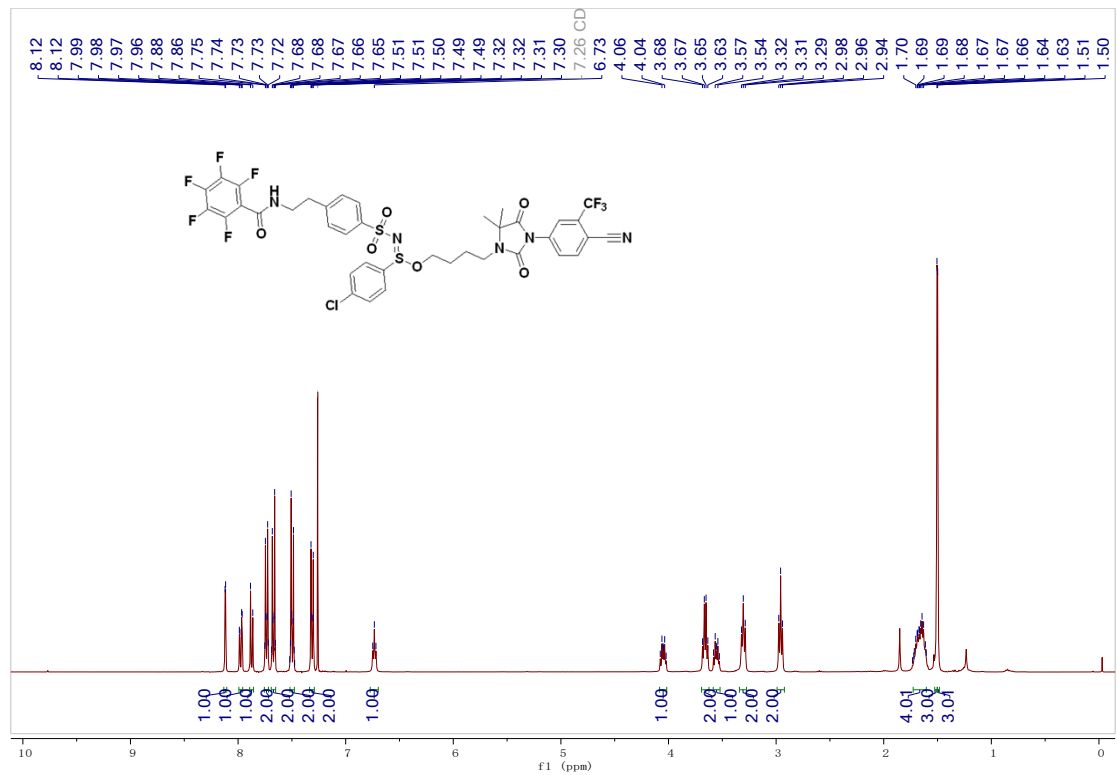

<sup>13</sup>C NMR (100 MHz, Chloroform-*d*) of compound 8h

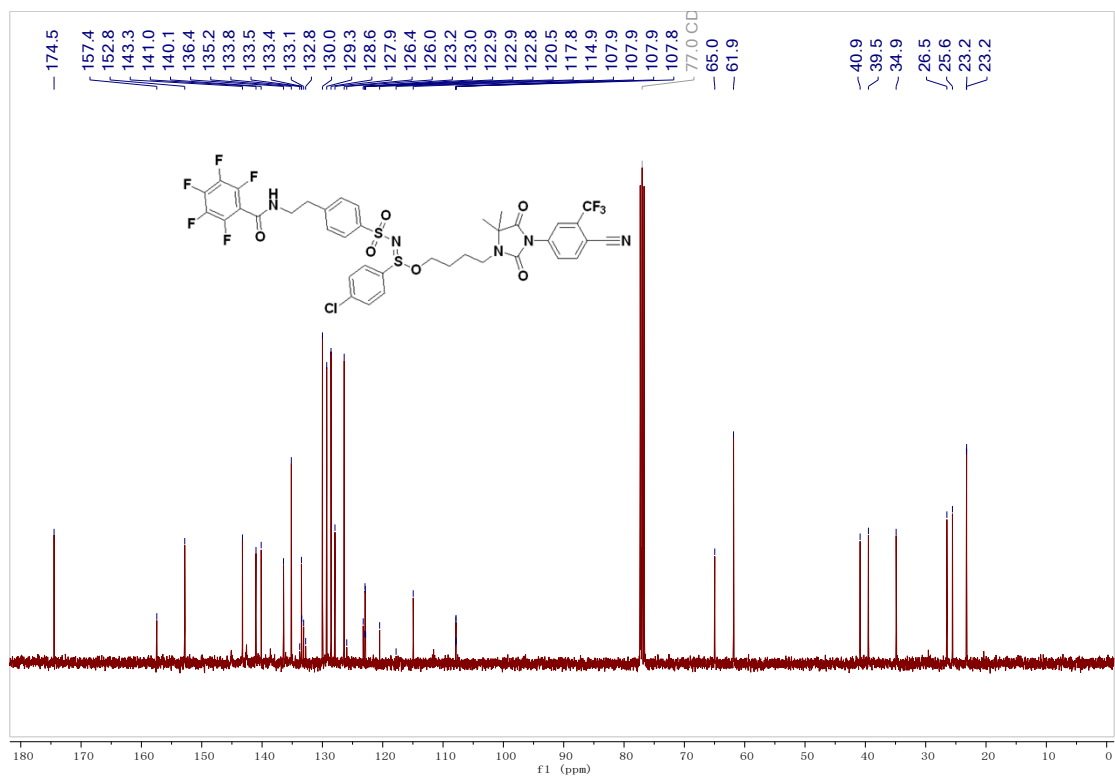

<sup>19</sup>F NMR (376 MHz, Chloroform-d) of compound **8h**

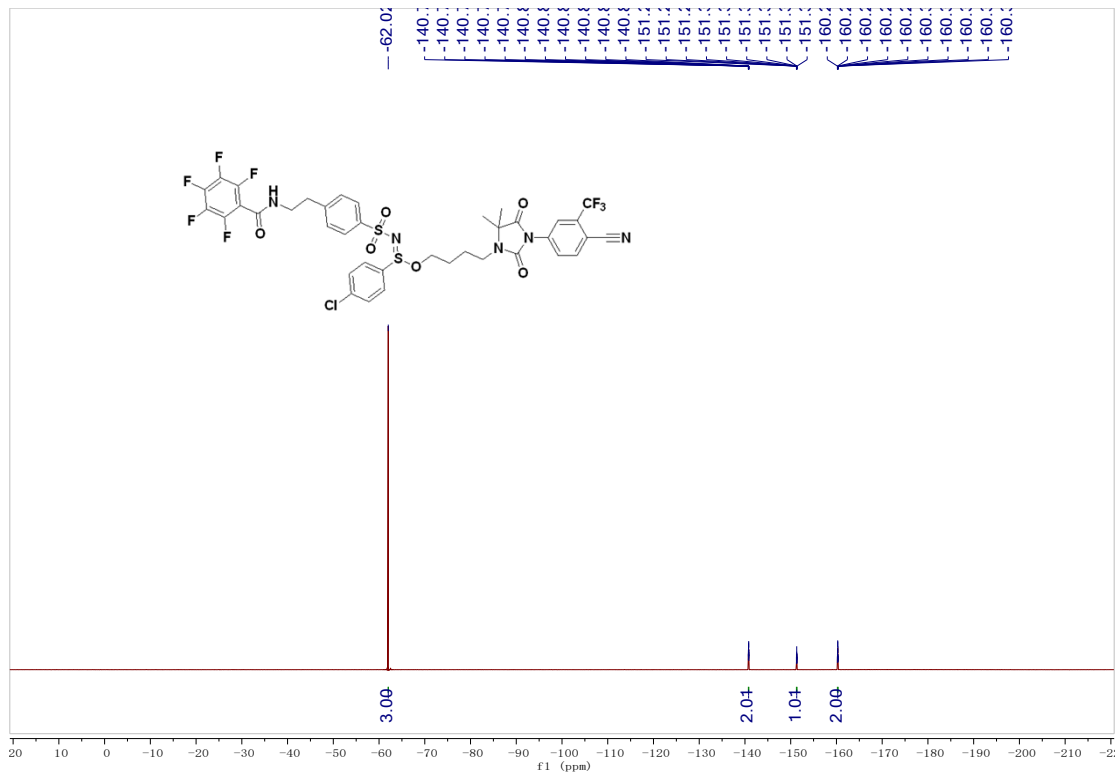

<sup>13</sup>C NMR (400 MHz, Chloroform-d) of compound **8i**

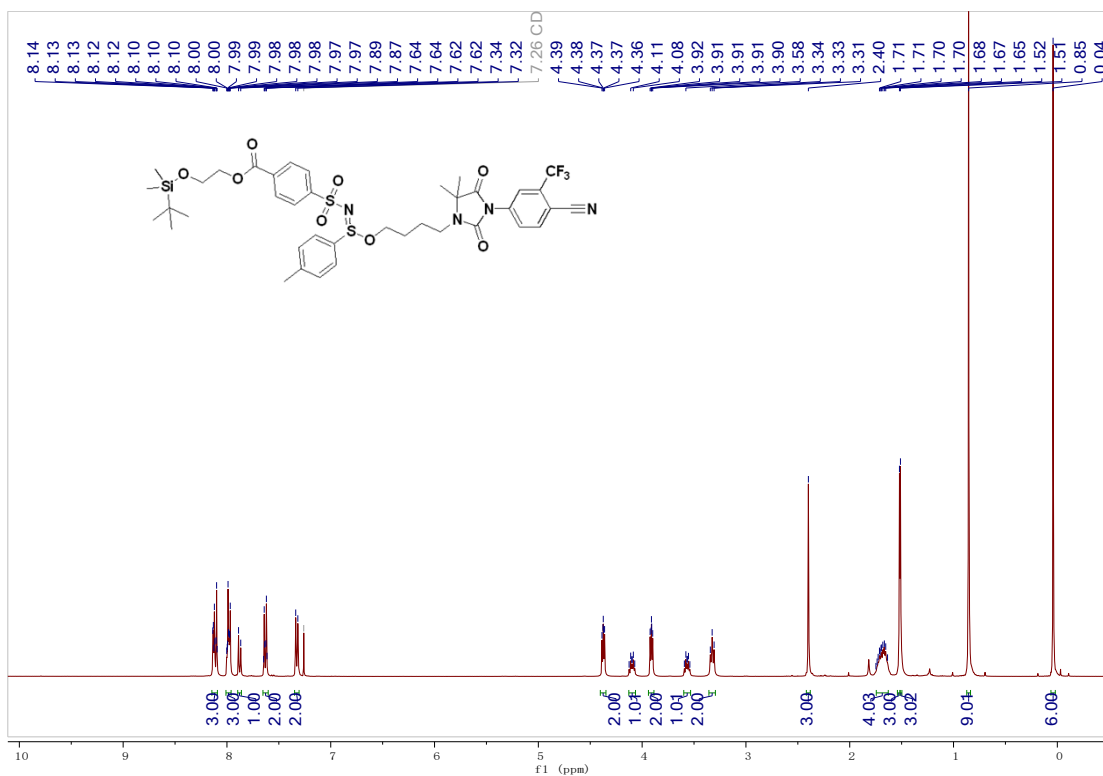

**<sup>13</sup>C NMR (100 MHz, Chloroform-*d*) of compound 8i**

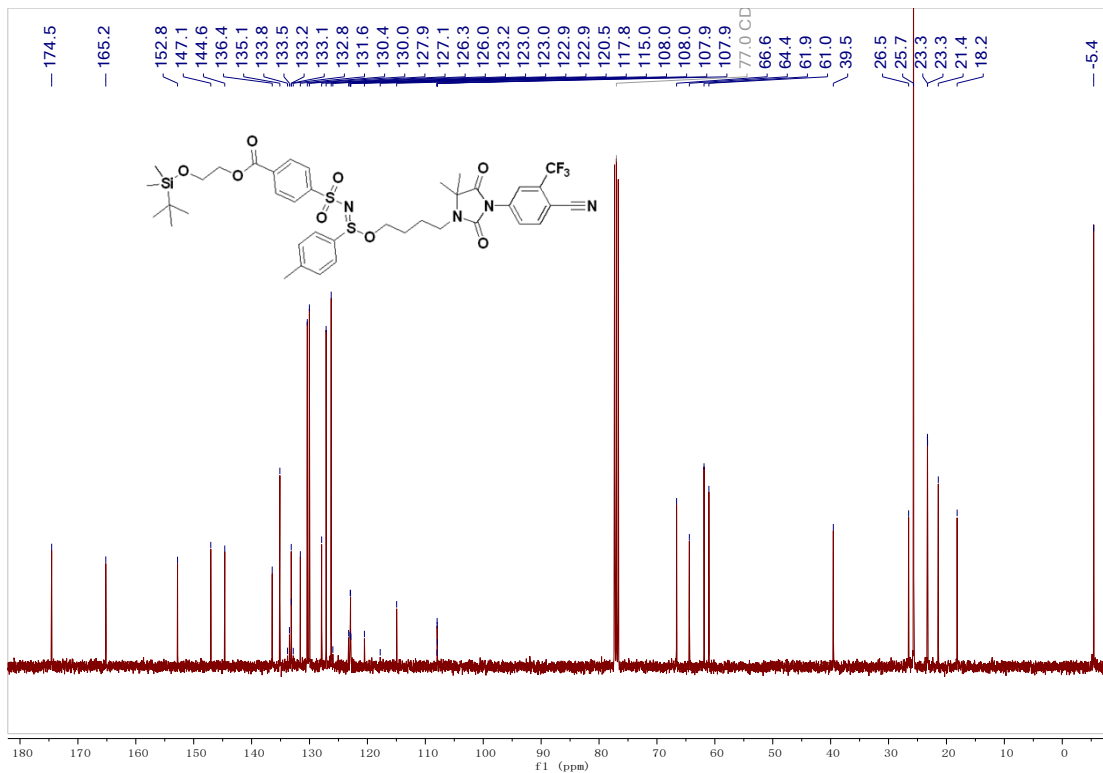

**<sup>19</sup>F NMR (376 MHz, Chloroform-*d*) of compound 8i**

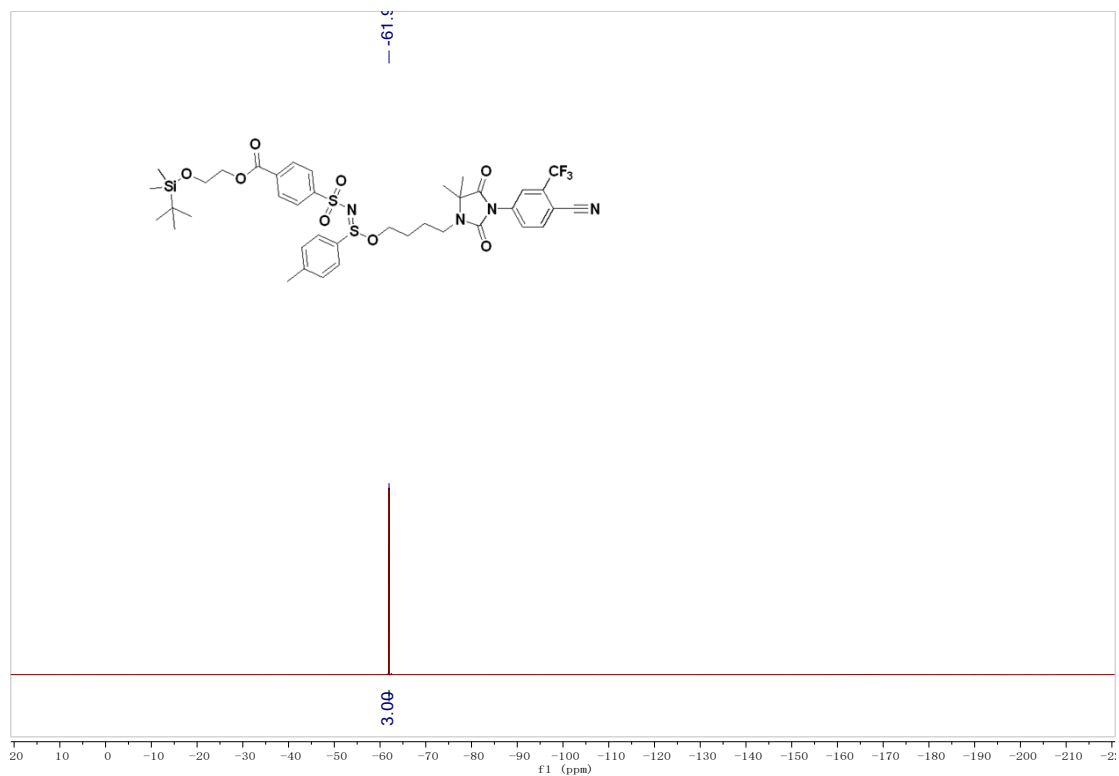

Supplement: d4qo00502c1.pdf [file d4qo00502c1.pdf]
